# Supplementary material for: Purified Zymogens Reveal Mechanisms of Snake Venom Metalloproteinase Auto-Activation
Source: eLife journal article supplement (doi:10.7554/elife.109112), 2026-01-21

Figure S2a 1

Expression of mature SVMP PI

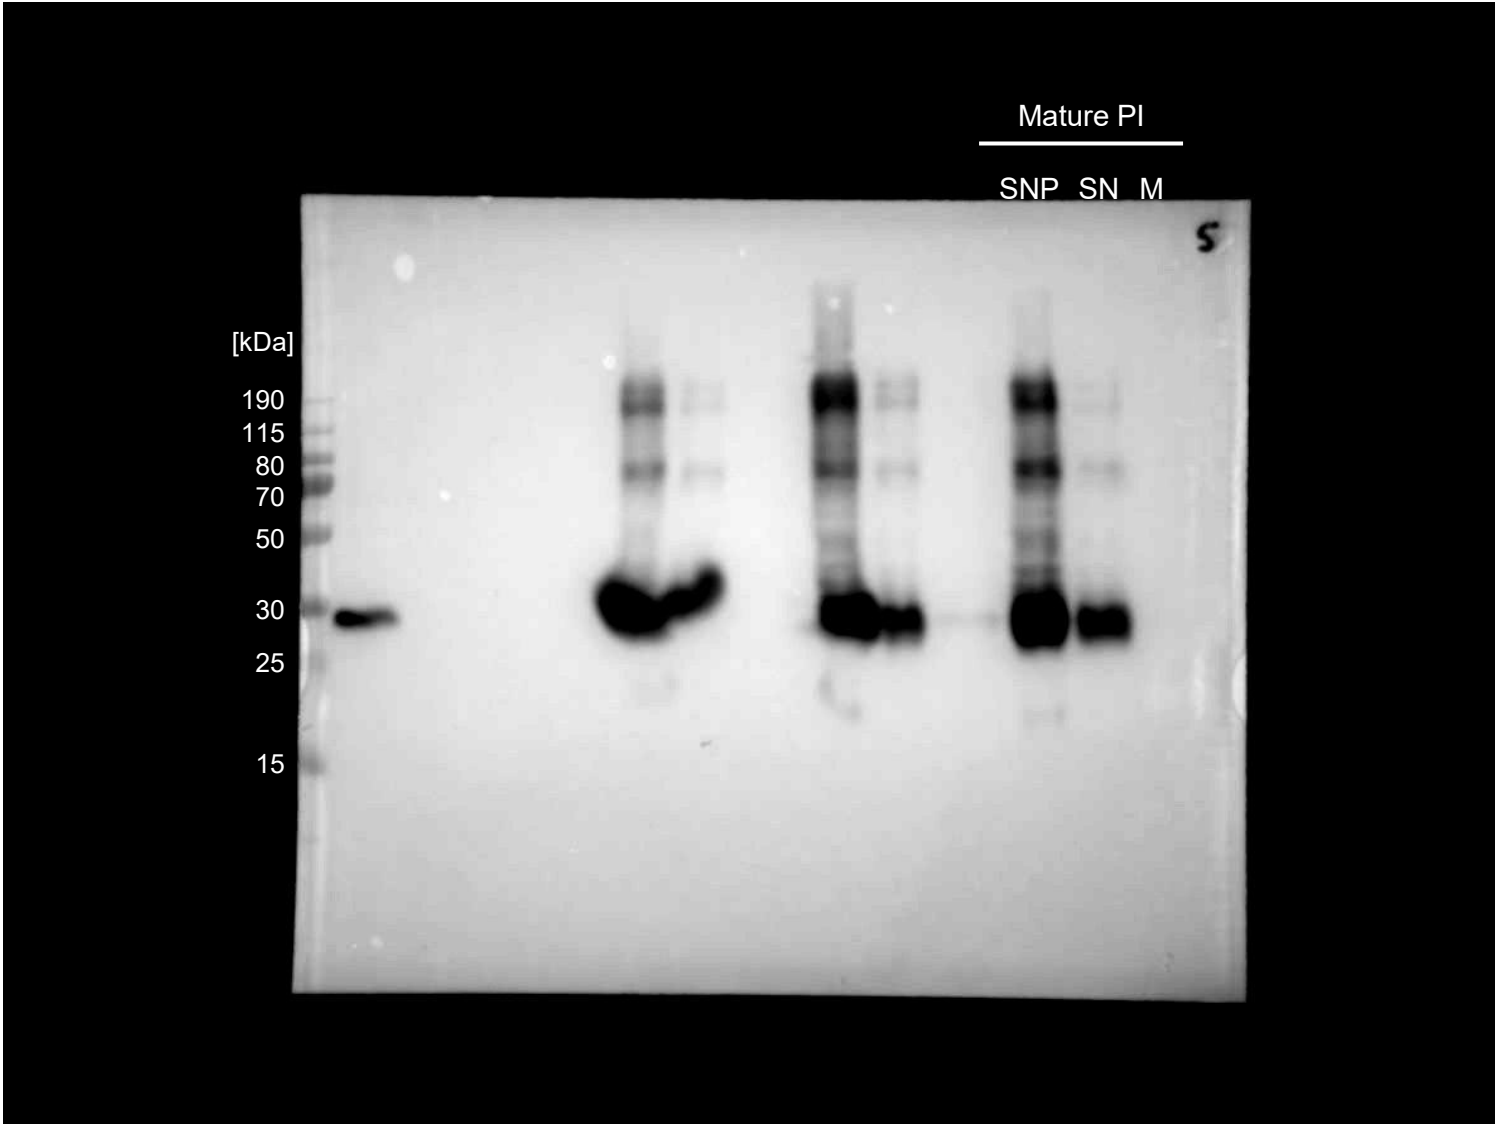

Figure S2a 2

Expression of mature SVMP PIII

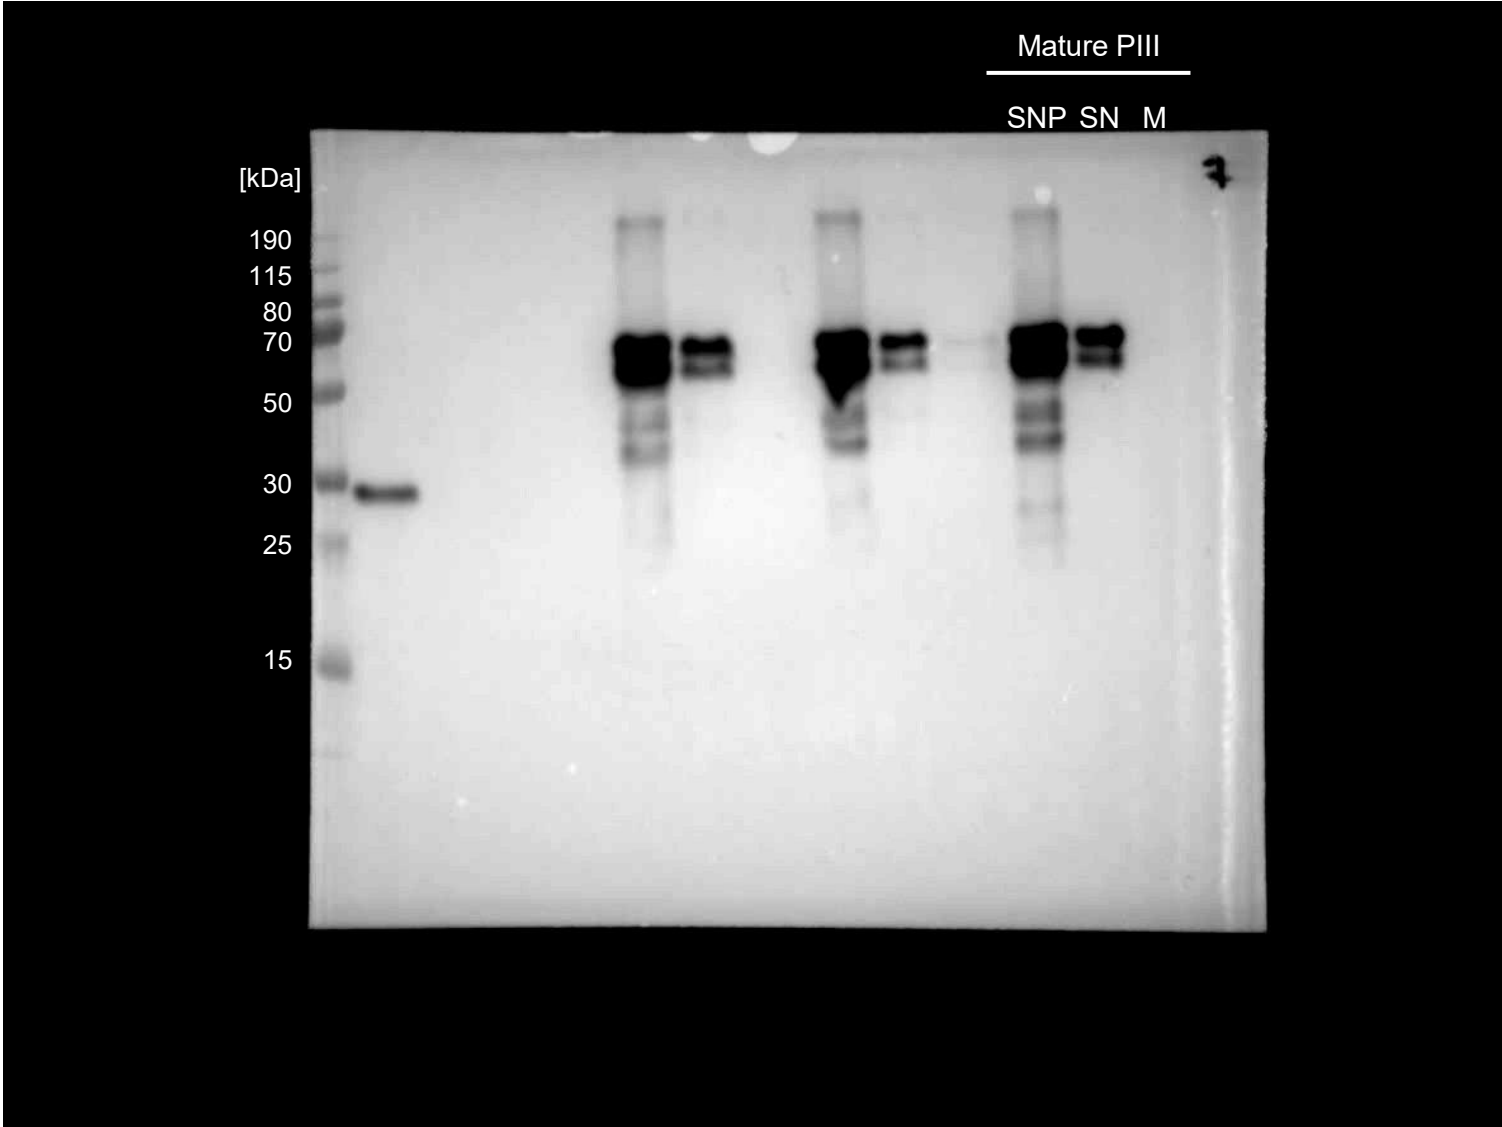

Figure S2b

Expression of SVMP7 in the presence of Marimastat

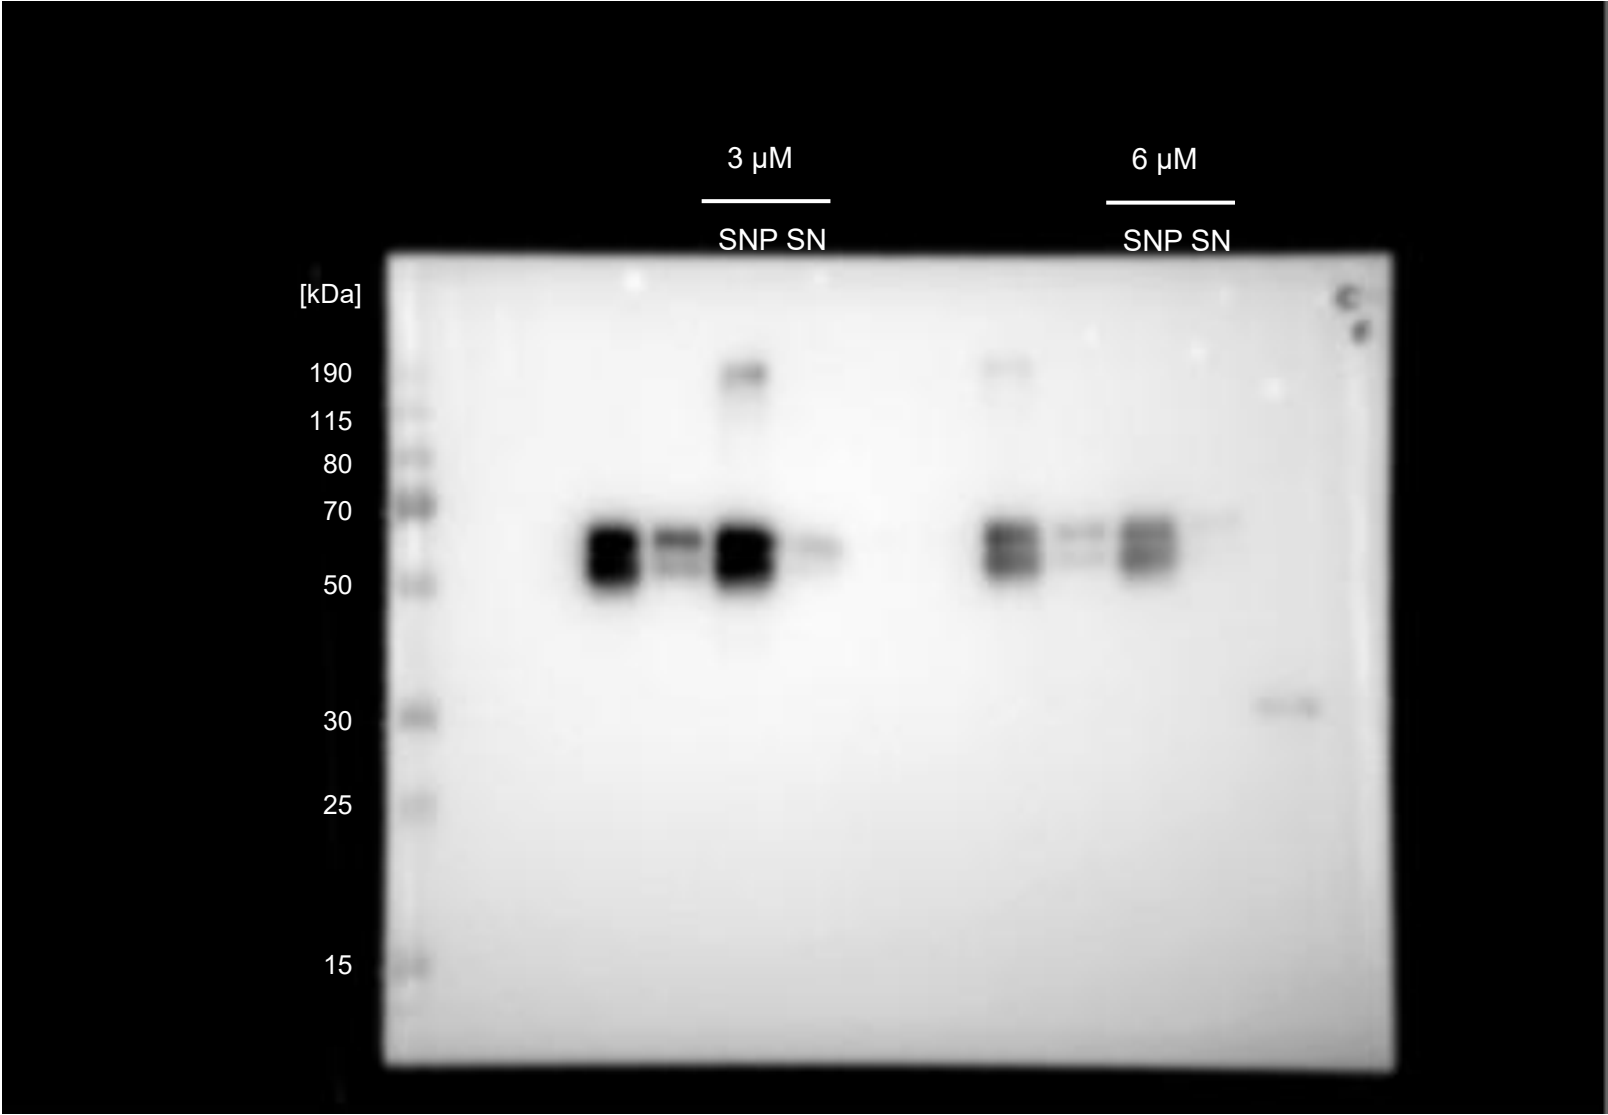

Figure S2c

## Expression of SVMP active site mutants

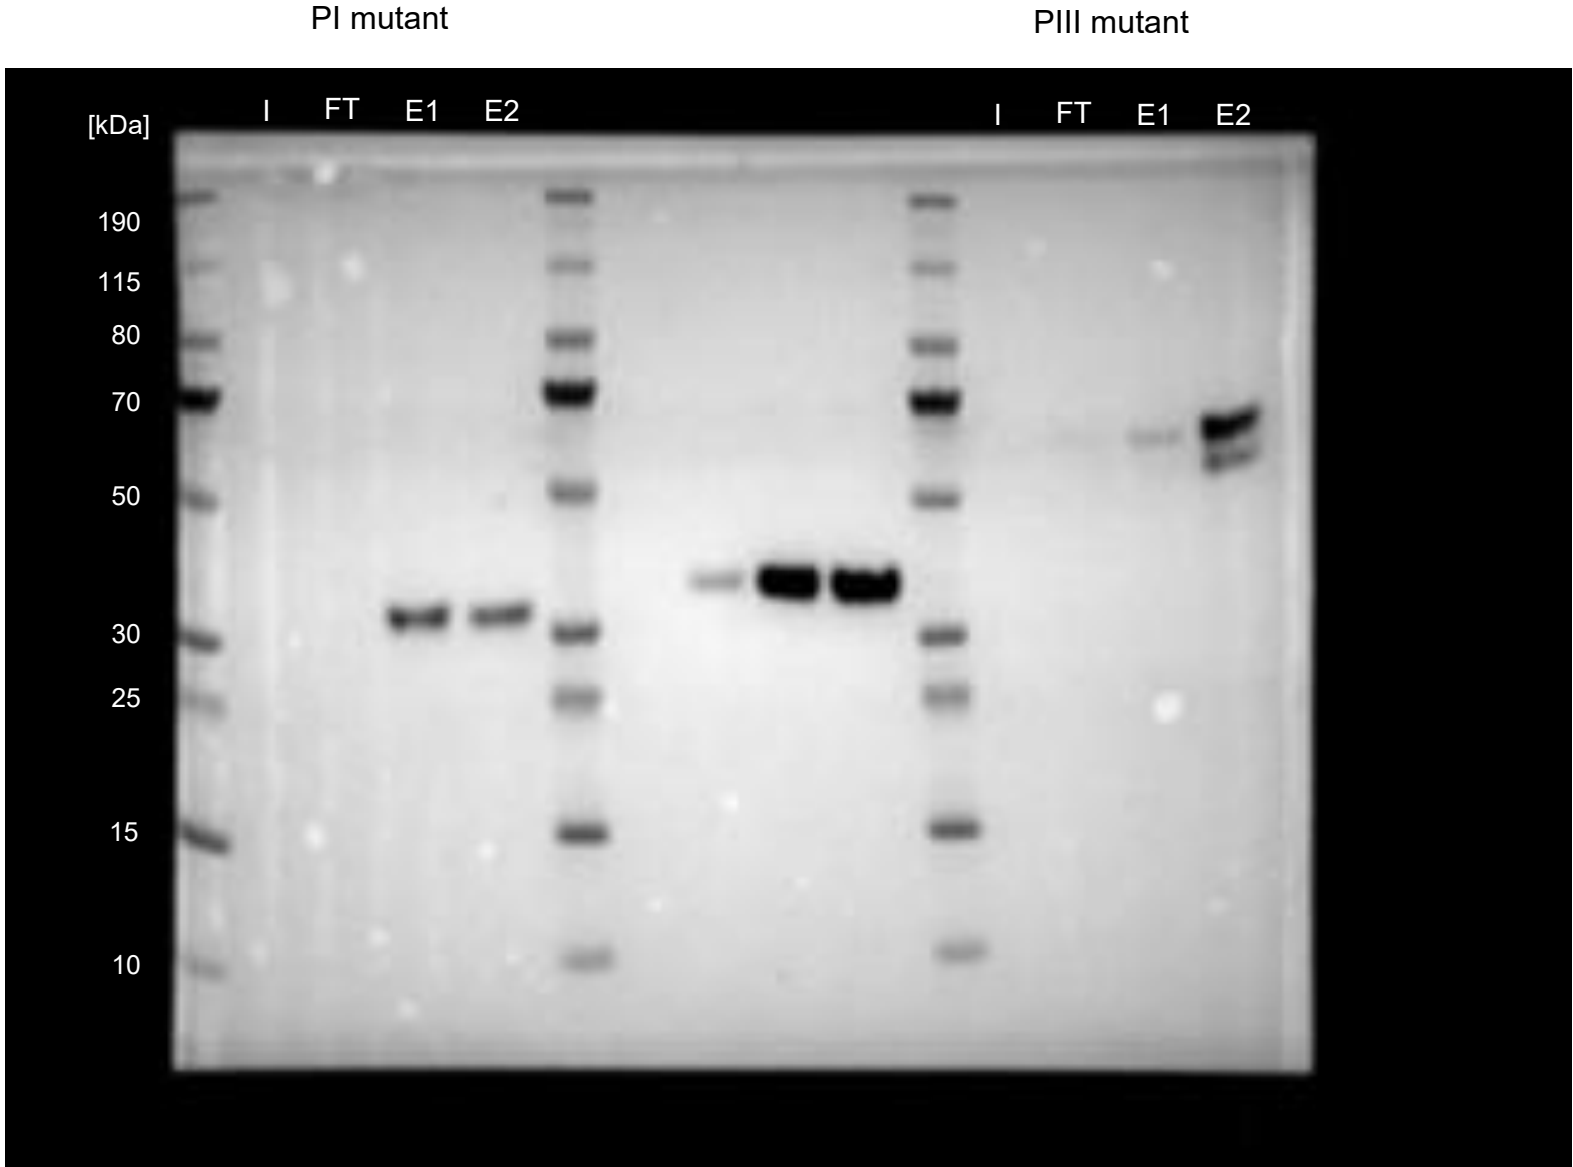

Figure S2d

Expression of propeptide-SVMP fusion protein

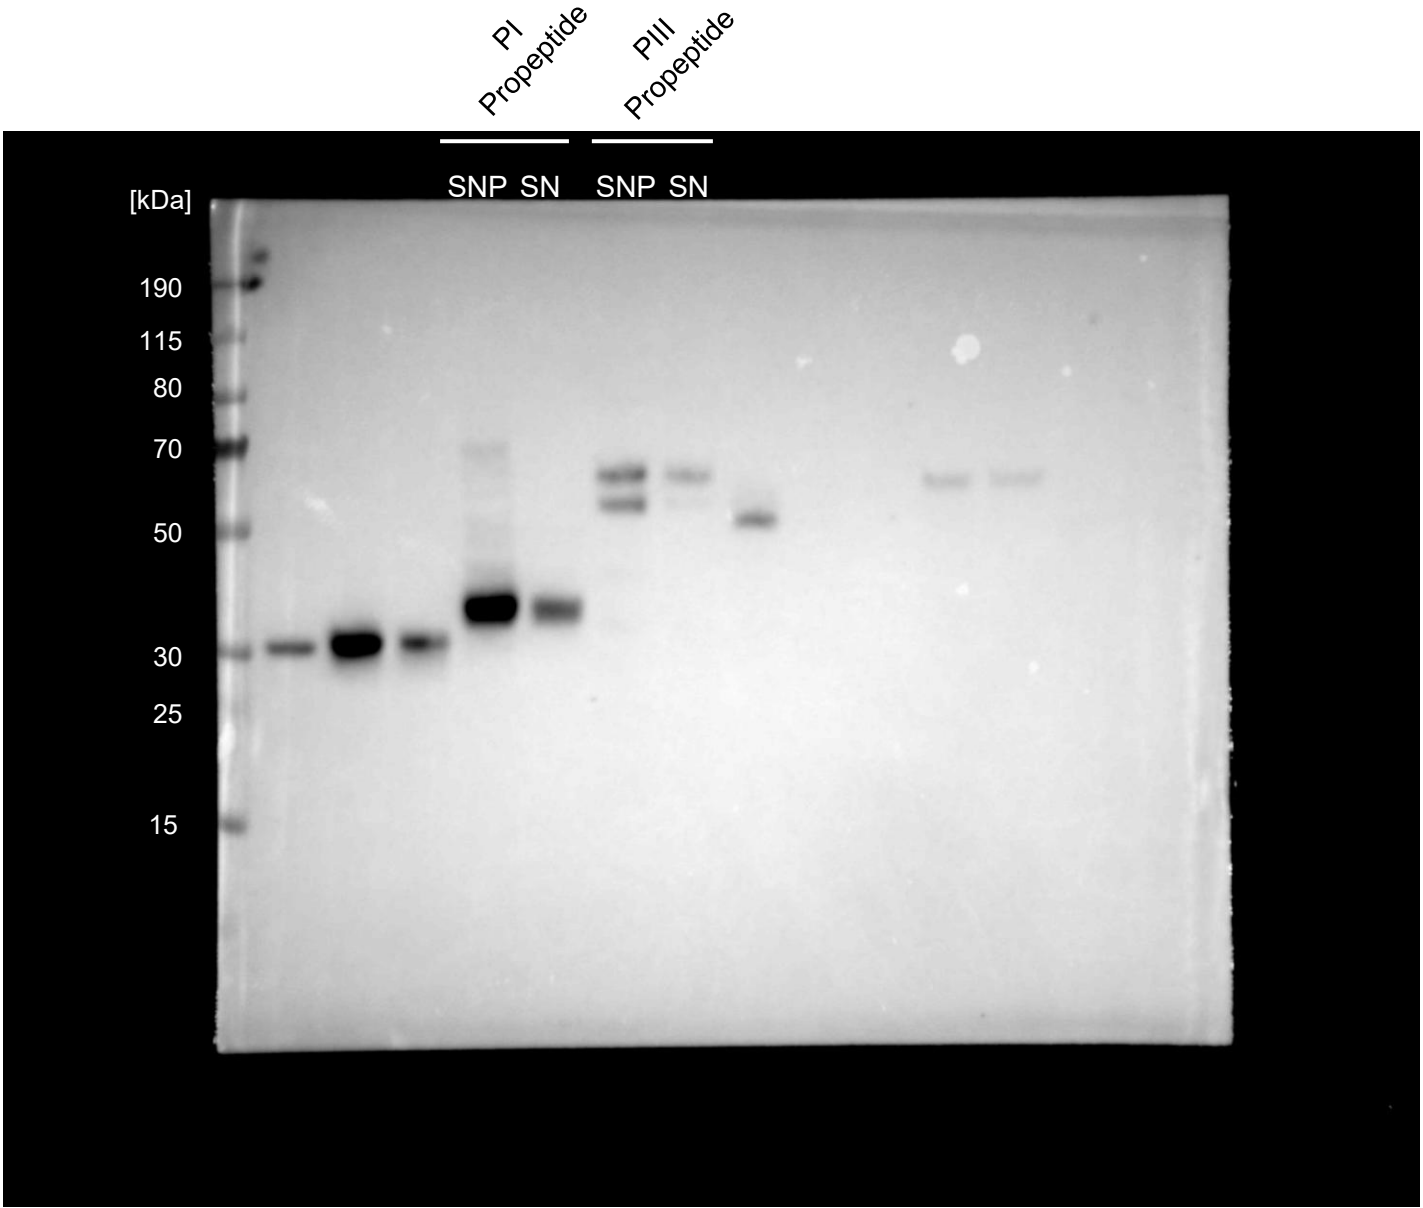

Supplement: fig2-figsupp1-data2 [file Figure 2 supplement 1 - source data 2.pdf › Figure 2 supplement 1 - source data 2/Figure 2 supplement 1 - source data 2.pdf]
