# Supplementary material for: Purified Zymogens Reveal Mechanisms of Snake Venom Metalloproteinase Auto-Activation
Source: eLife journal article supplement (doi:10.7554/elife.109112), 2026-01-21

Figure 3a

SVMP PI zymogen SEC – SDS-PAGE gel

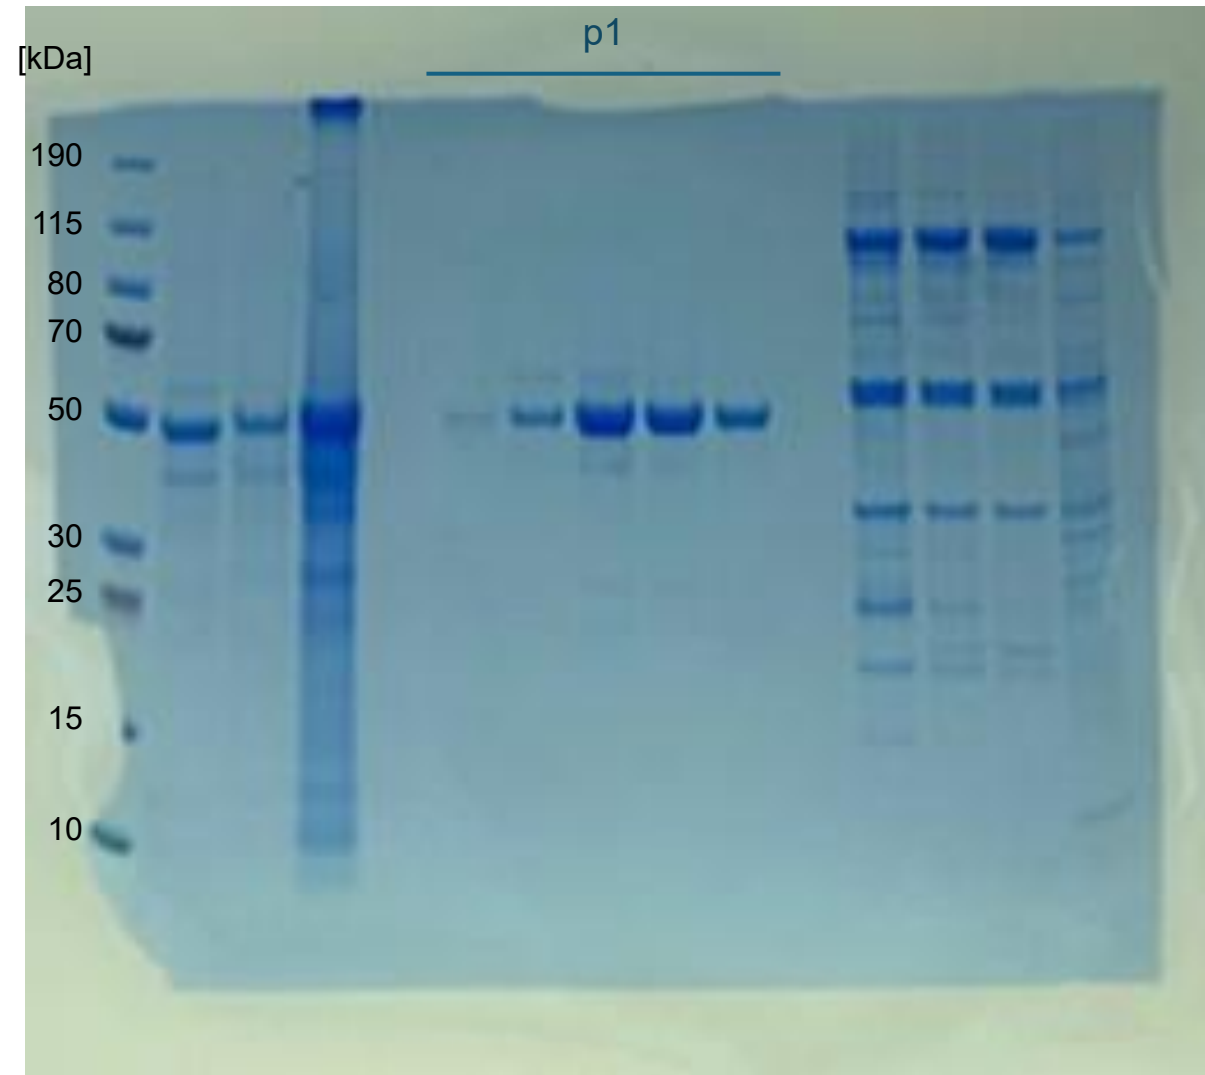

Figure 3b

SVMP PII zymogen SEC – SDS-PAGE

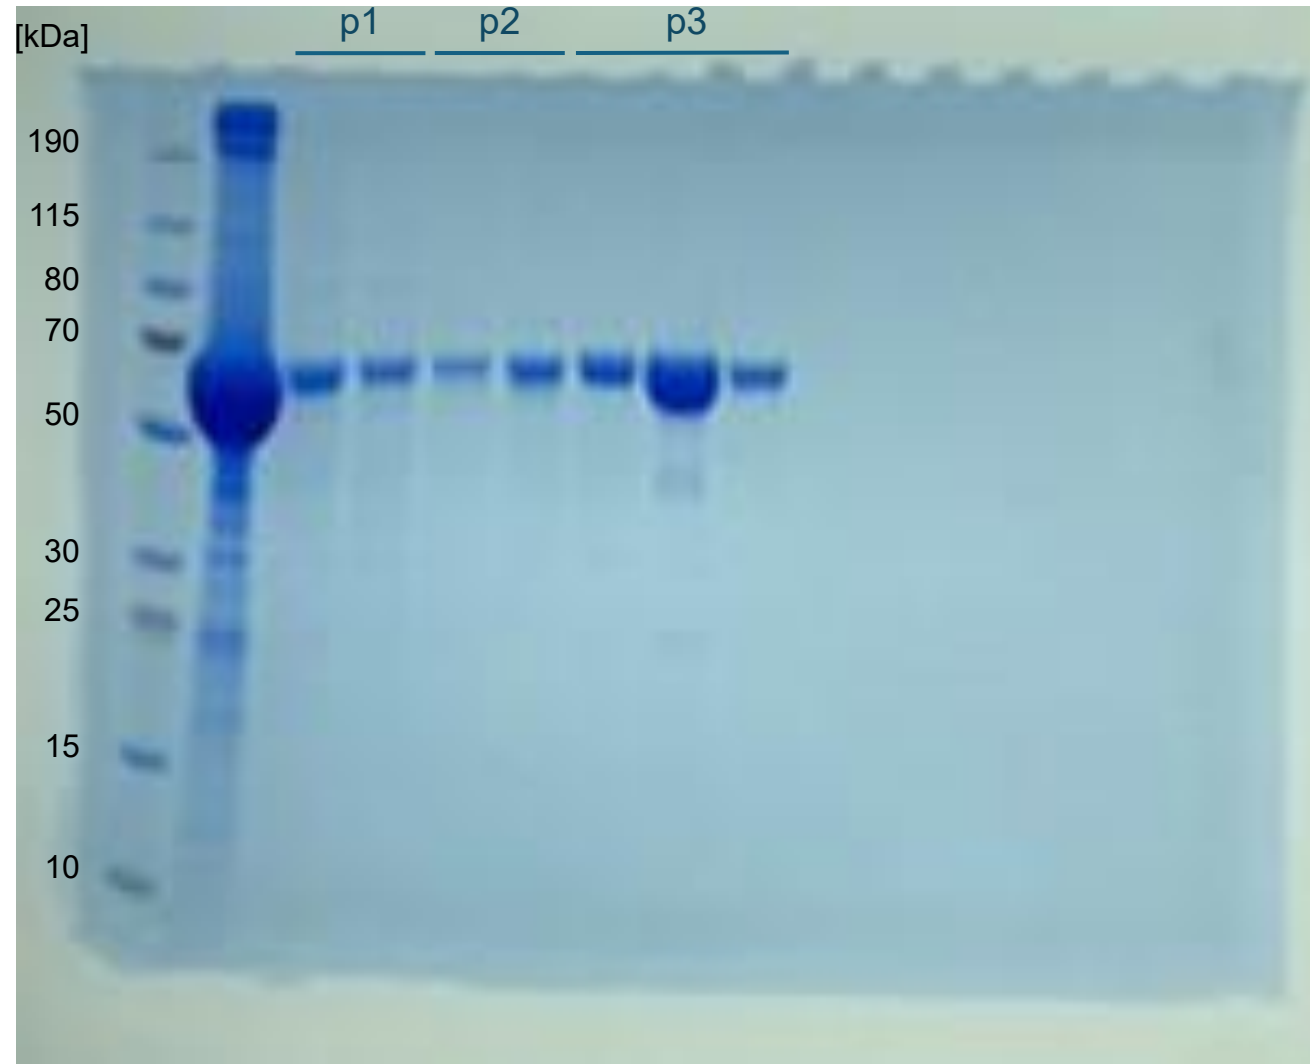

Figure 3c

SVMP PIII zymogen SEC – SDS-PAGE

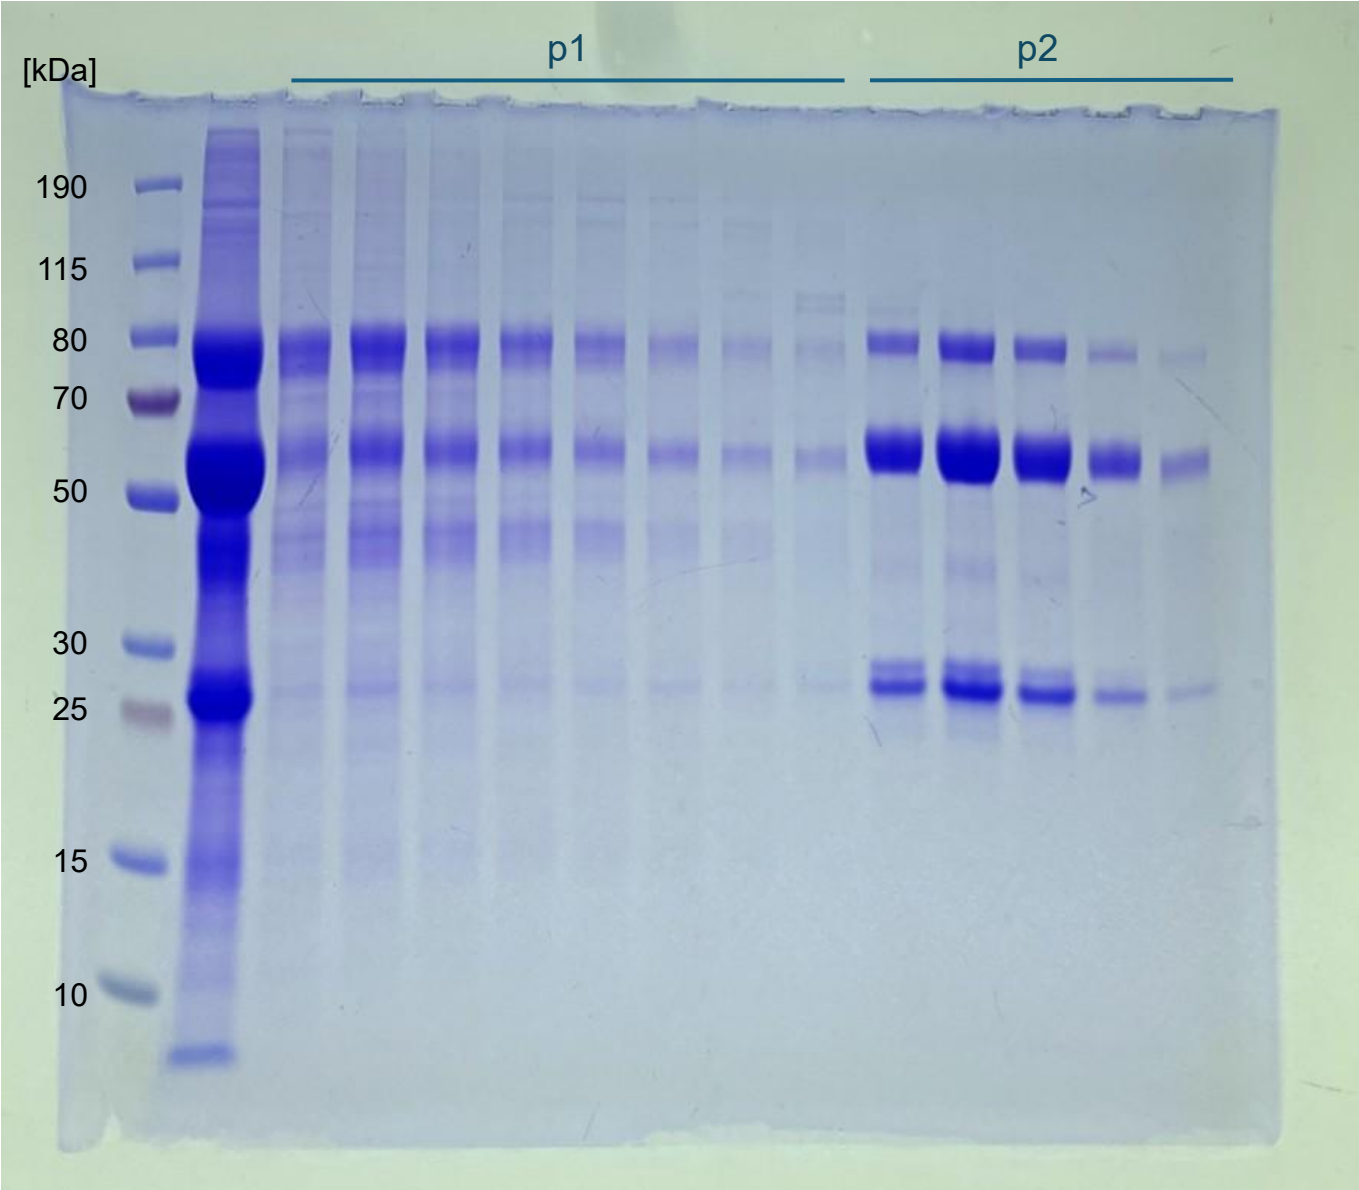

Figure 3d

SVMP PI zymogen – Activation test

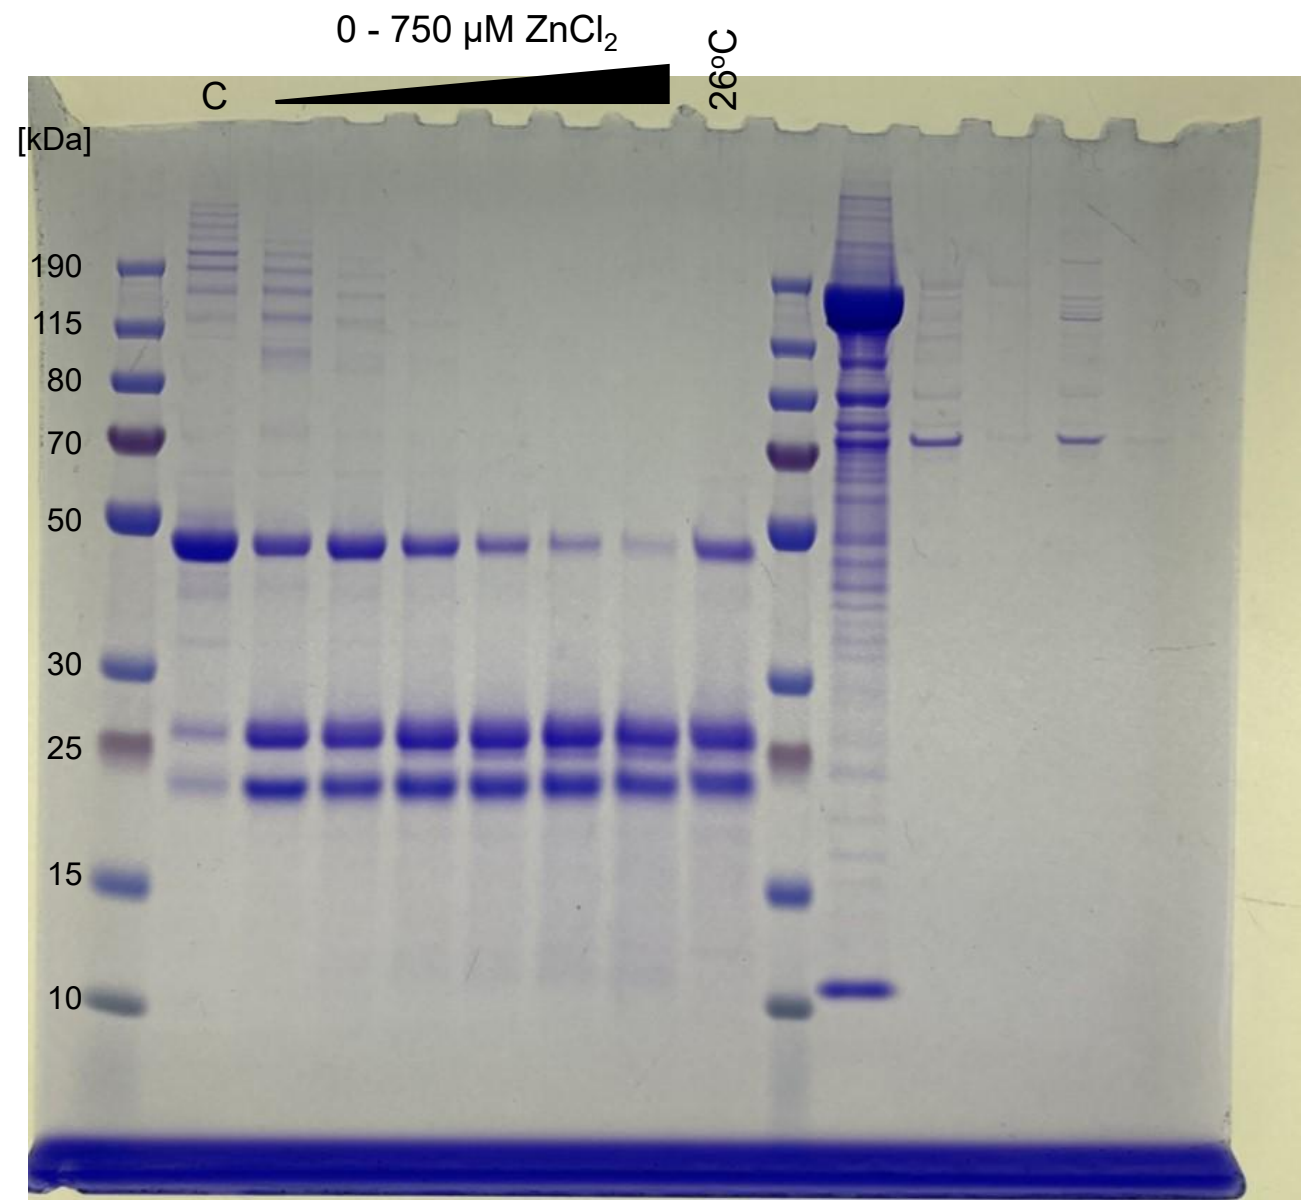

Figure 3e

SVMP PII zymogen – Activation test

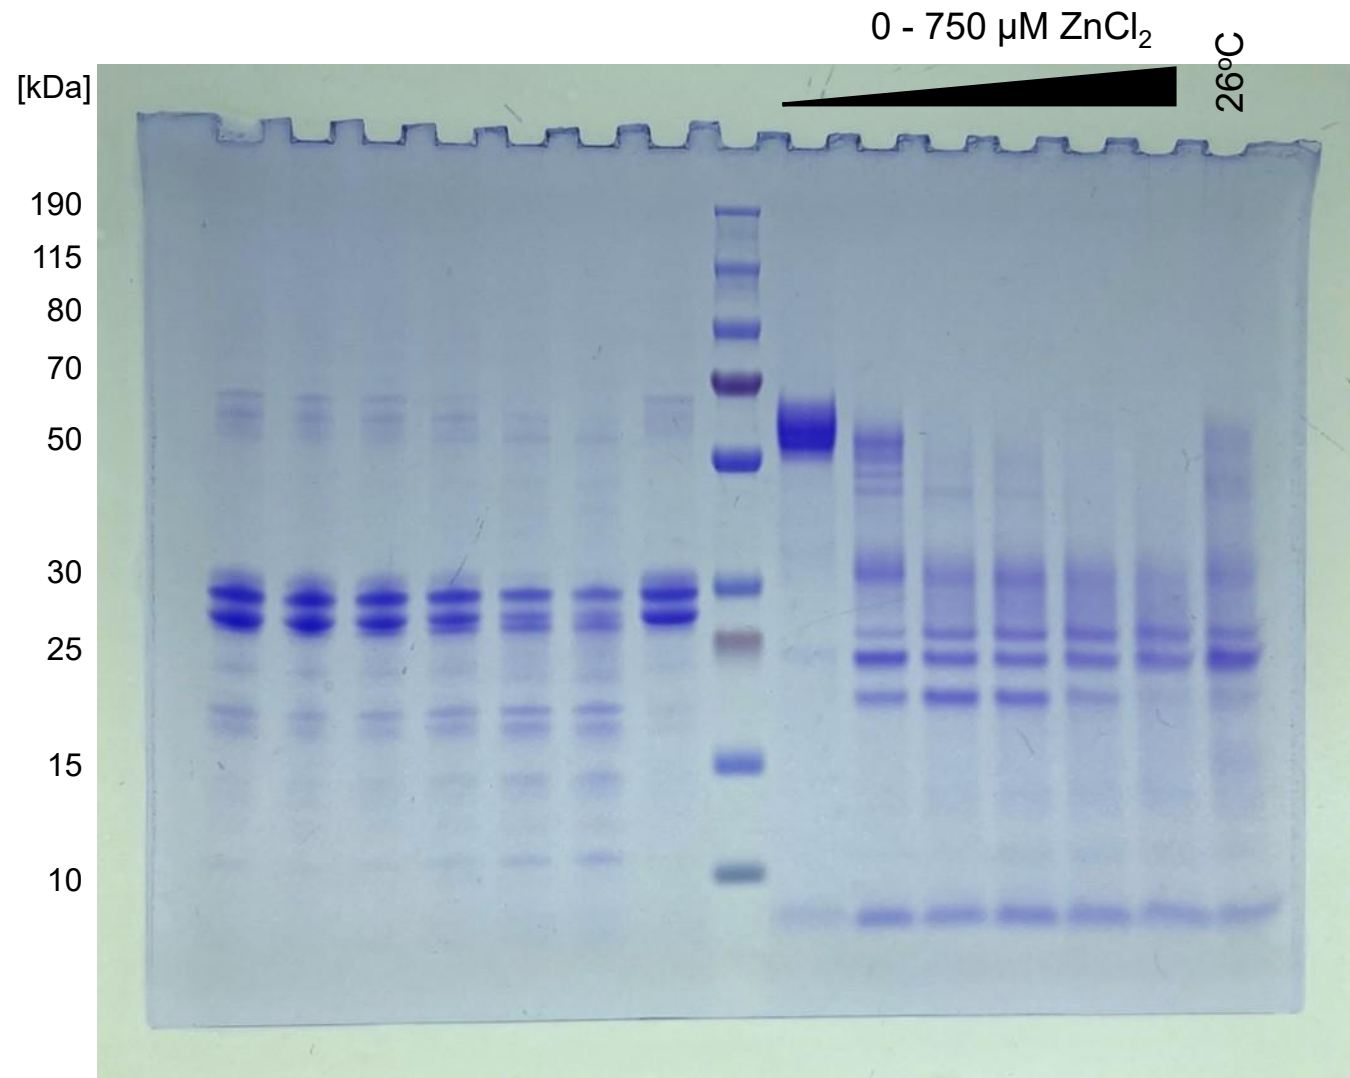

Figure 3f

### SVMP PIII zymogen – Activation test

0 - 750  $\mu$ M ZnCl<sub>2</sub>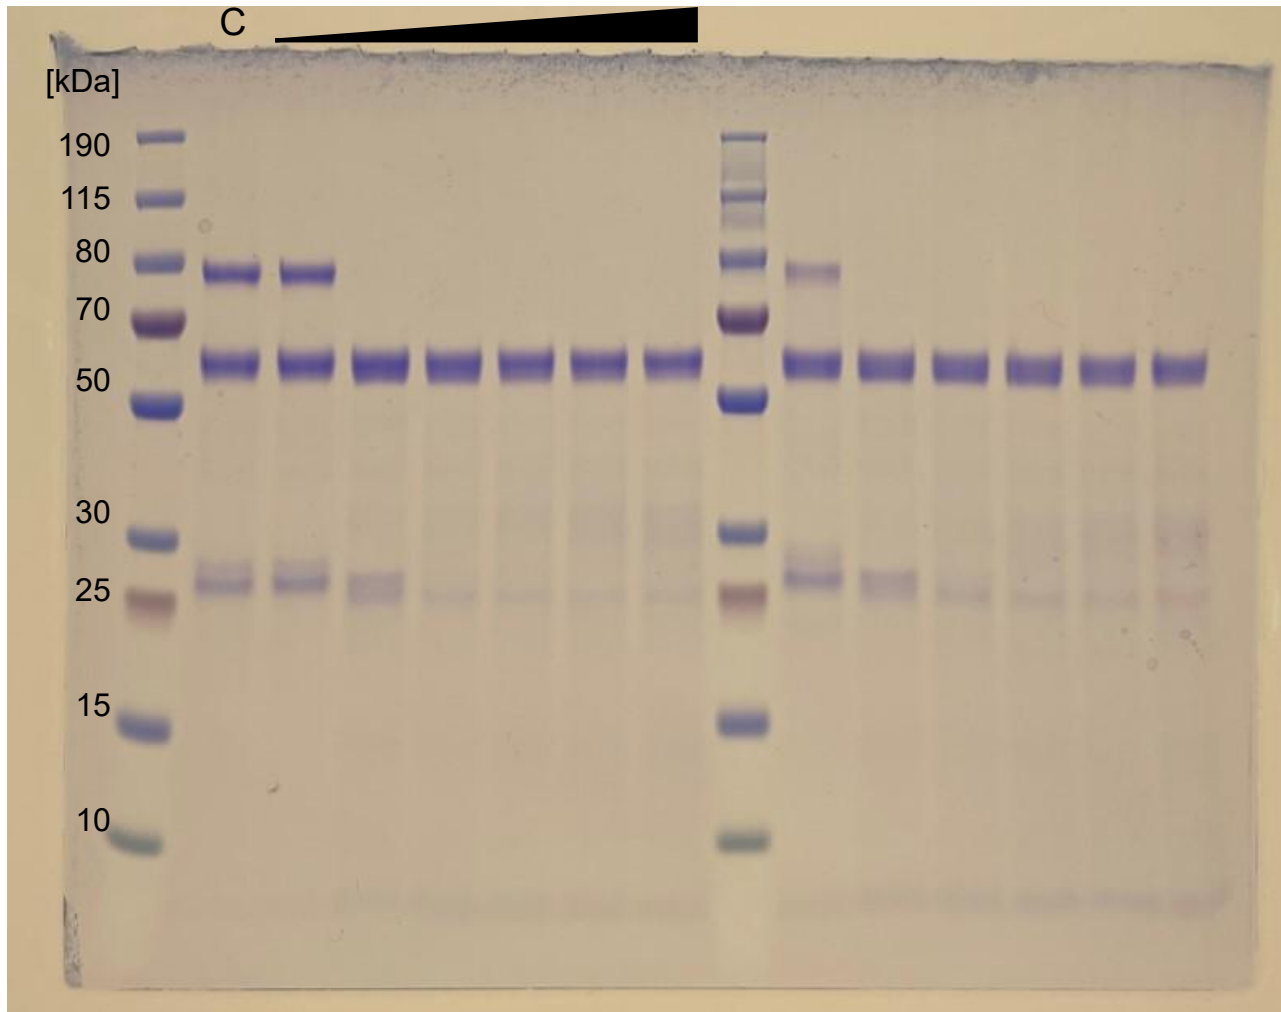

Supplement: fig3-data2 [file Figure 3 - source data 2.pdf › Figure 3 - source data 2.pdf]
