# Supplementary material for: Purified Zymogens Reveal Mechanisms of Snake Venom Metalloproteinase Auto-Activation
Source: eLife journal article supplement (doi:10.7554/elife.109112), 2026-01-21

Figure S4a

PI SVMP C-terminal auto-cleavage before and after dialysis, following IMAC purification - SDS-PAGE

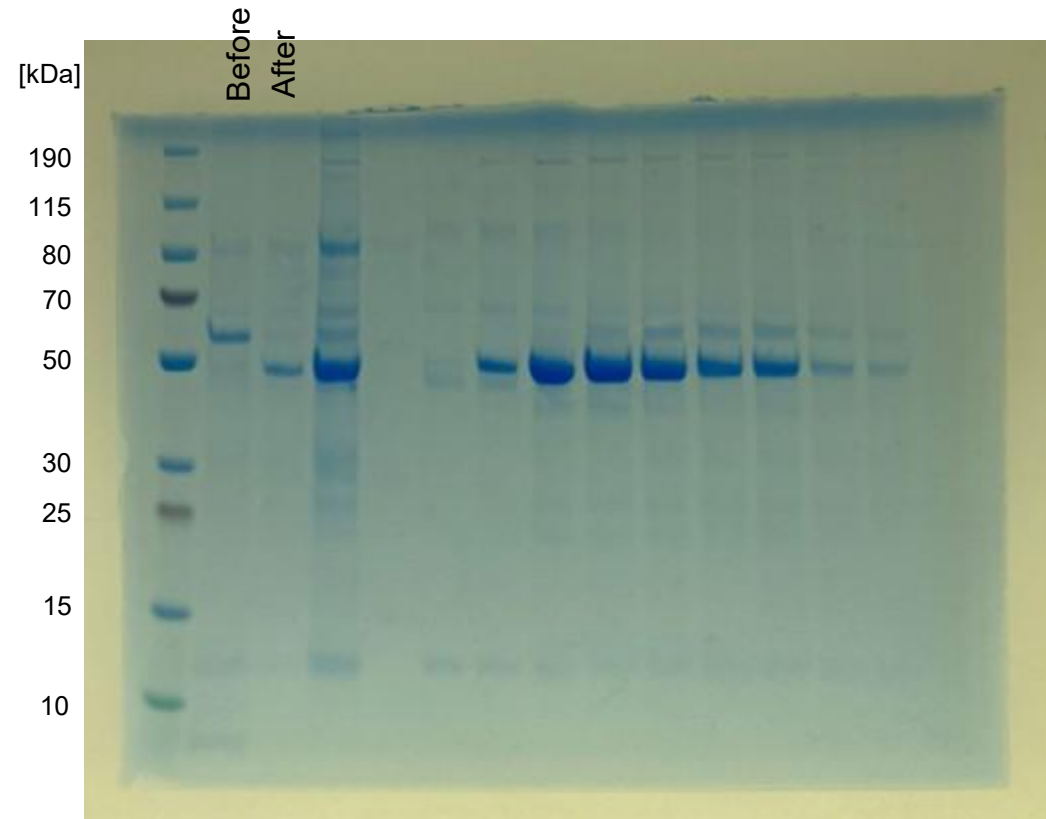

Figure S4b

PI SVMP C-terminal auto-cleavage before and after dialysis, following IMAC purification - WB

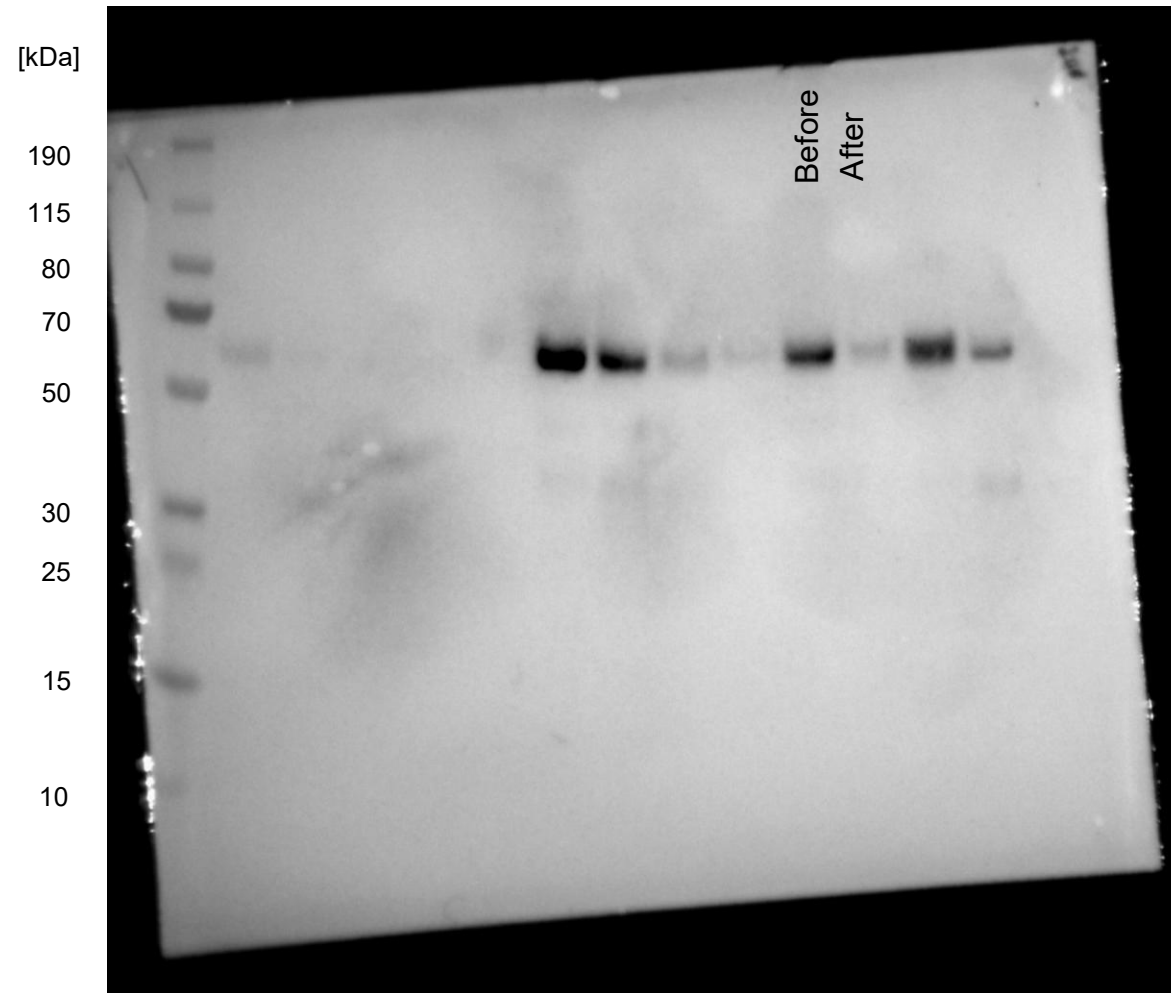

Supplement: fig3-figsupp1-data2 [file Figure 3 supplment 1 - source data 2.pdf › Figure 3 supplement 1 - source data 2/Figure 3 supplment 1 - source data 2.pdf]
