# Supplementary material for: Purified Zymogens Reveal Mechanisms of Snake Venom Metalloproteinase Auto-Activation
Source: eLife journal article supplement (doi:10.7554/elife.109112), 2026-01-21

Figure S5a

Reducing SDS-PAGE of IMAC purification of PIΔC SVM

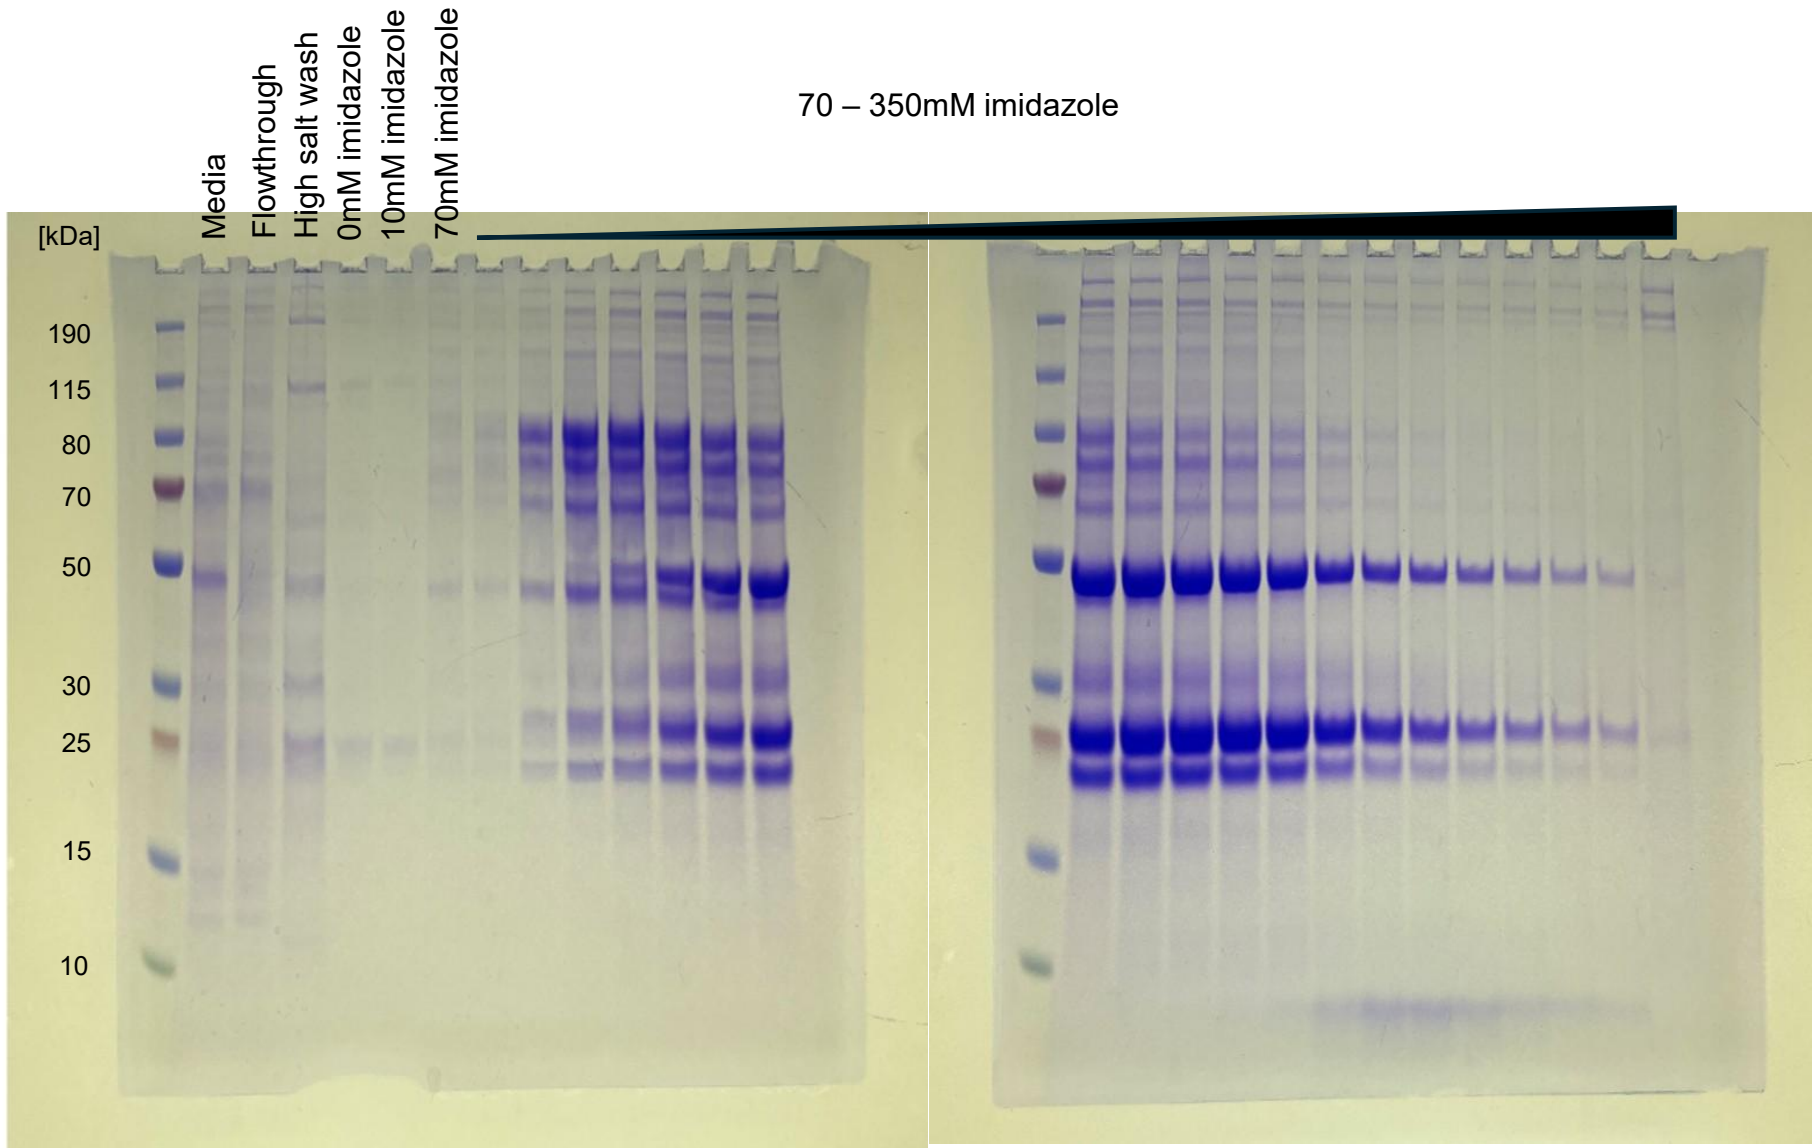

Figure S5b

Reducing SDS-PAGE of IMAC purification of PIII SVMP

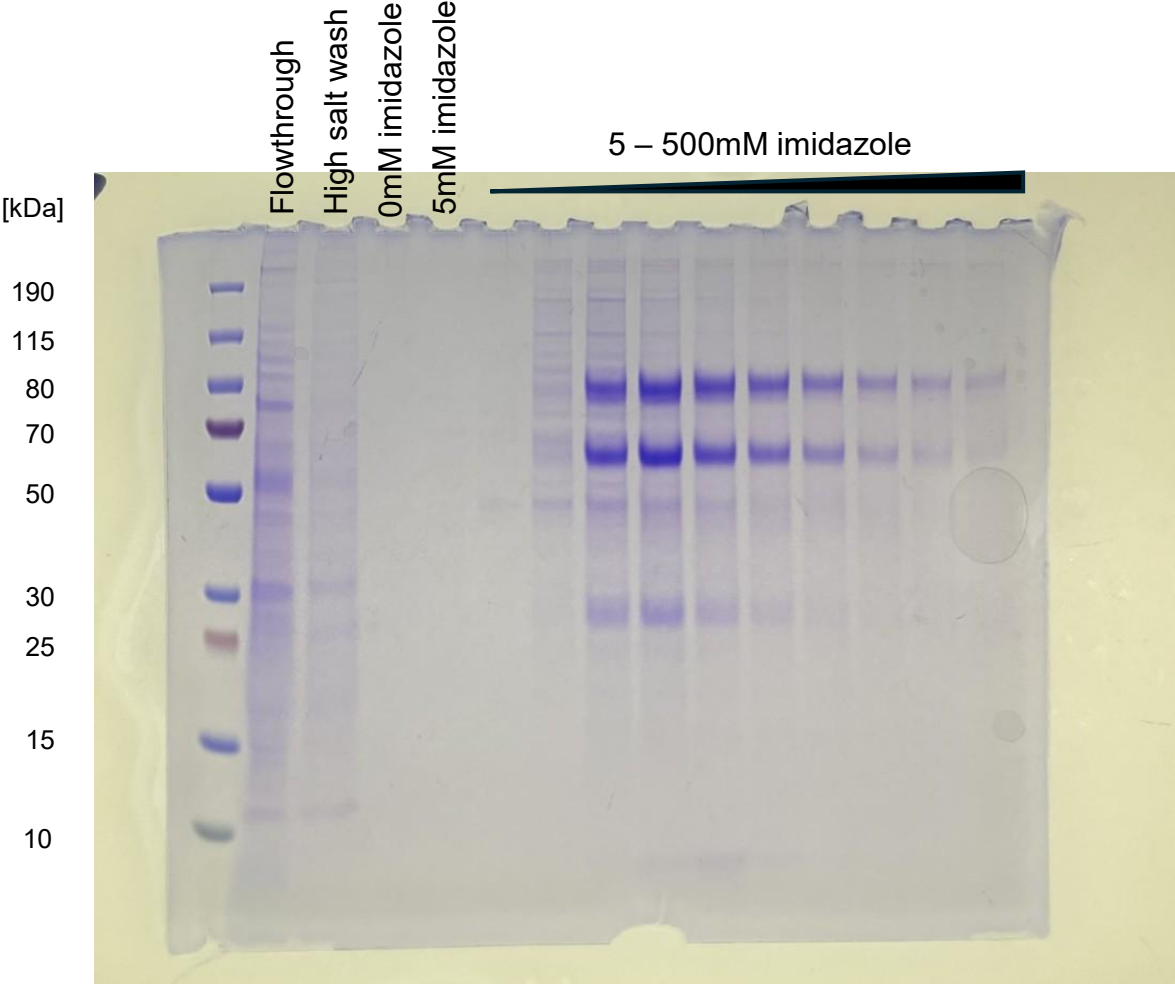

Supplement: fig3-figsupp2-data2 [file Figure 3 supplement 2- source data 2.pdf › Figure 3 supplement 2- source data 2/Figure 3 supplement 2- source data 2.pdf]
