# Supplementary material for: Purified Zymogens Reveal Mechanisms of Snake Venom Metalloproteinase Auto-Activation
Source: eLife journal article supplement (doi:10.7554/elife.109112), 2026-01-21

Figure S6a

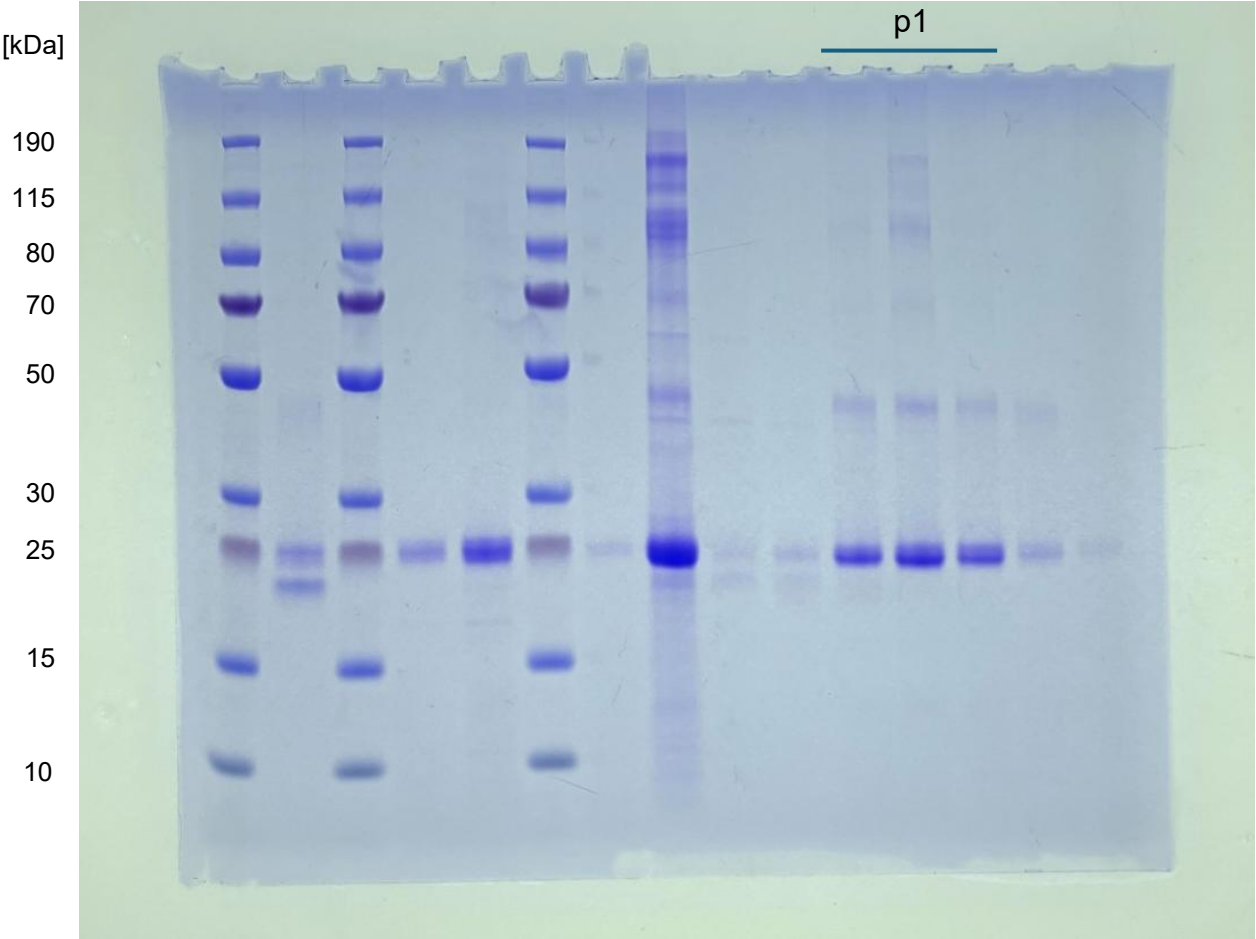

Figure S6b

SDS-PAGE of metalloproteinase domain of PIΔC

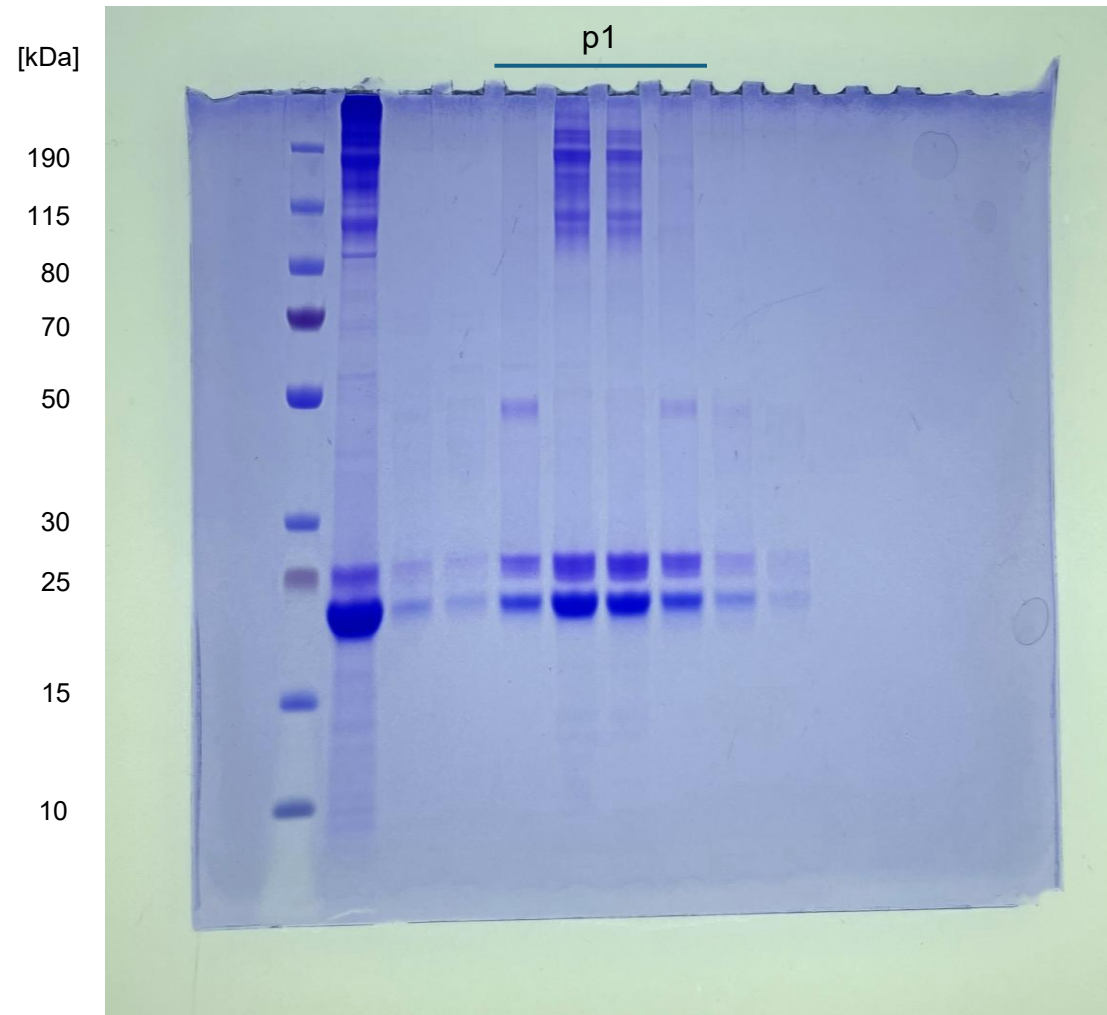

Figure S6c

PIΔC activity against casein with no prior addition of Zn<sup>2+</sup> ions (left) and with prior incubation with 450 μM of Zn<sup>2+</sup>(right).

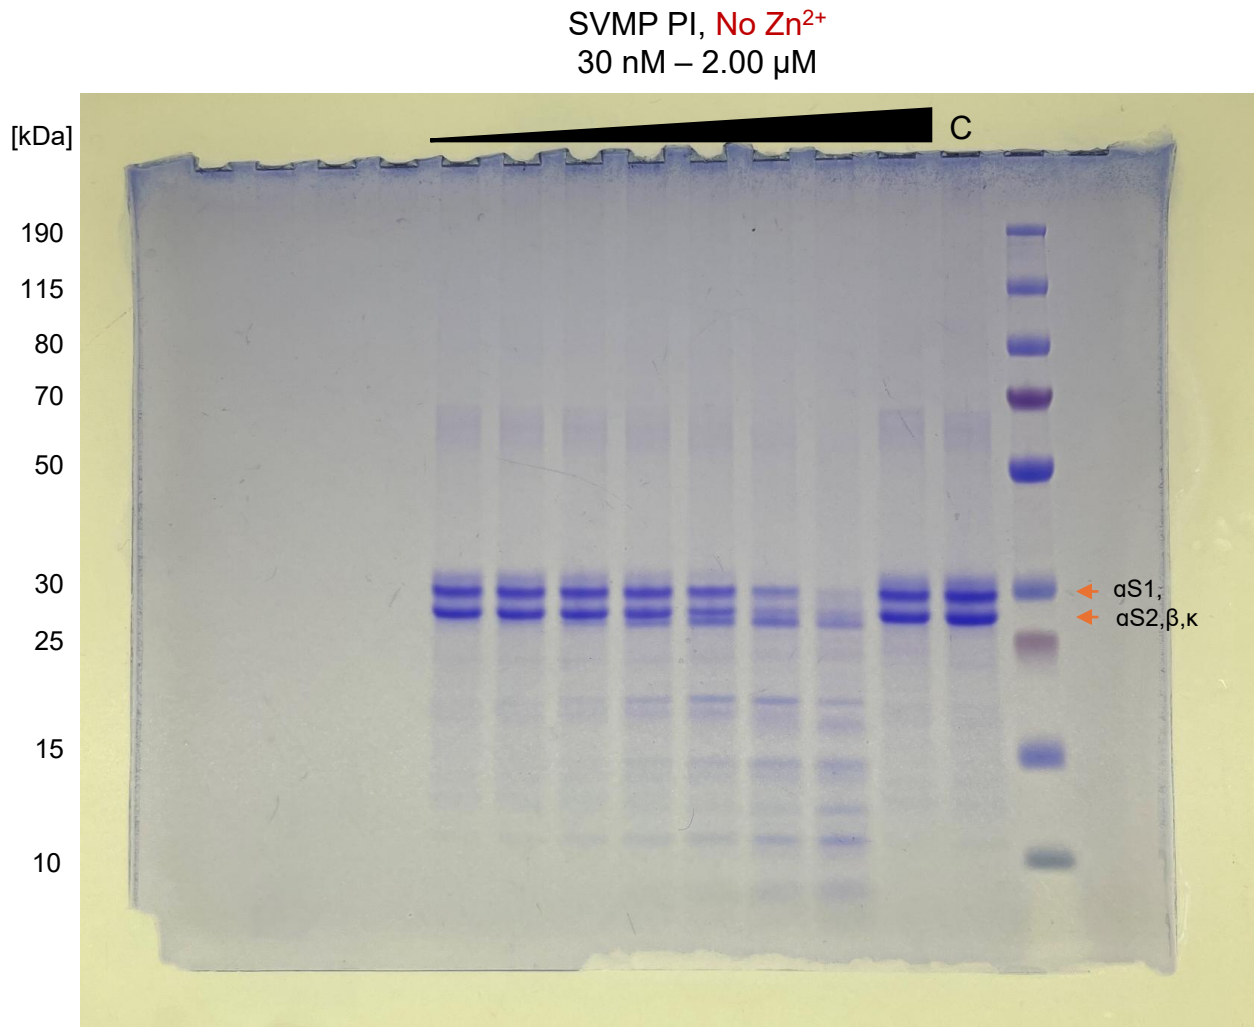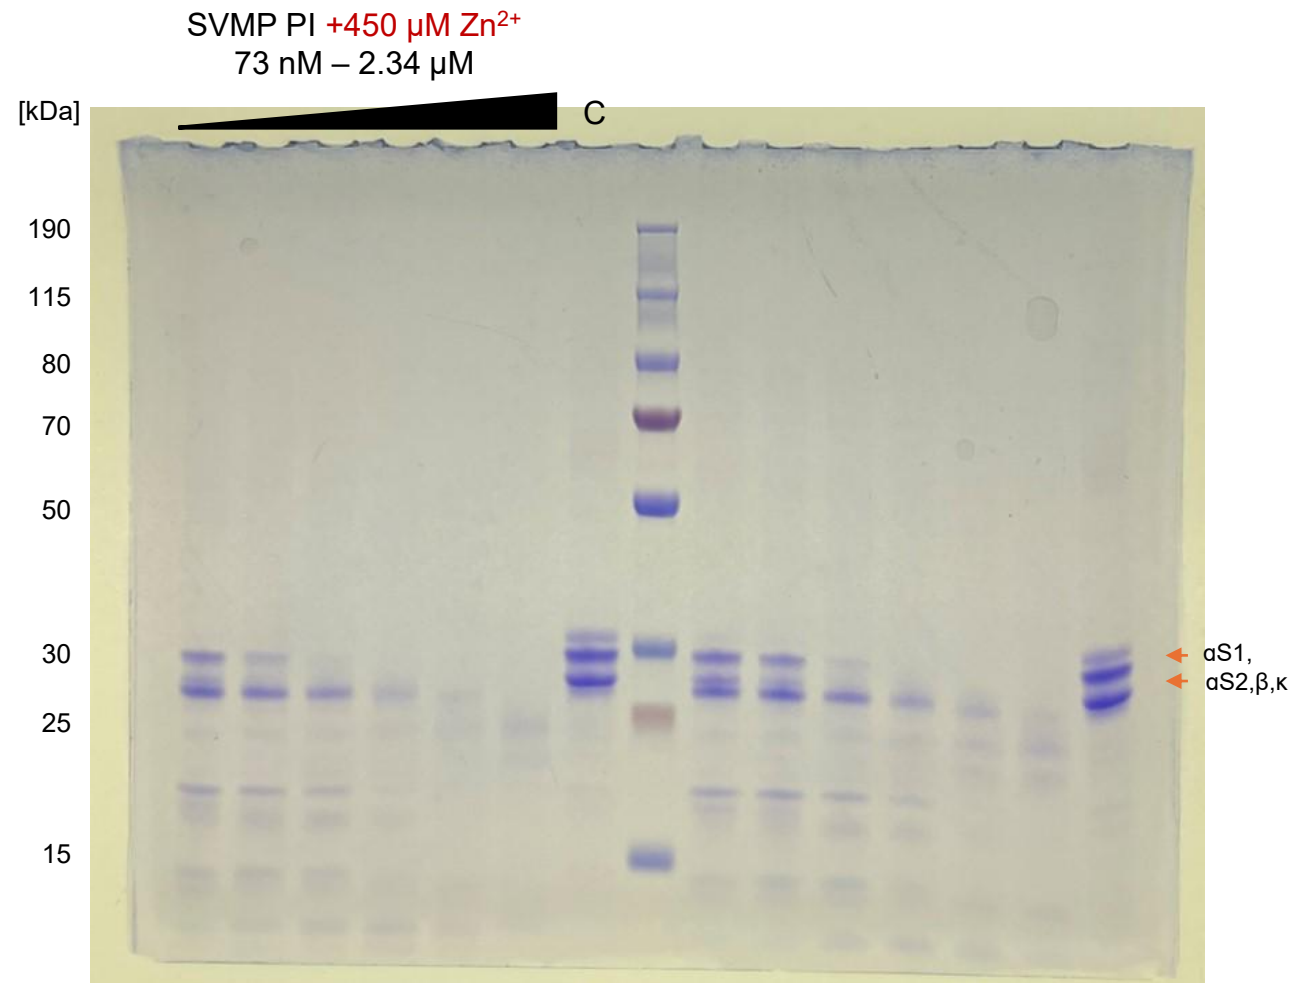

Supplement: fig3-figsupp3-data2 [file Figure 3 supplement 3 - source data 2.pdf › Figure 3 supplement 3 - source data 2/Figure 3 supplement 3 - source data 2.pdf]
