# Supplementary material for: Purified Zymogens Reveal Mechanisms of Snake Venom Metalloproteinase Auto-Activation
Source: eLife journal article supplement (doi:10.7554/elife.109112), 2026-01-21

Figure S7b

Reducing and non-reducing SDS-PAGE of SEC peaks 2 and 3 of PII SVMP zymogen

Reducing

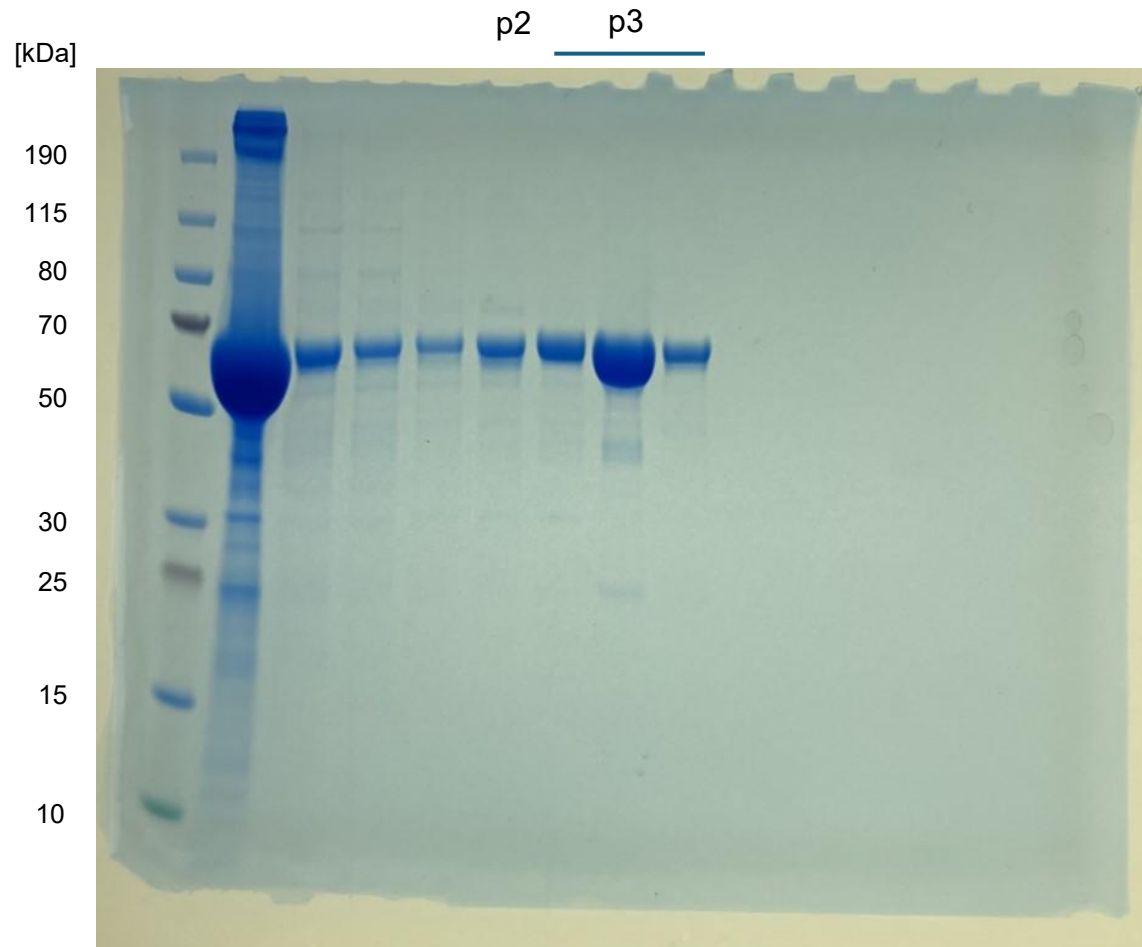

Non-reducing

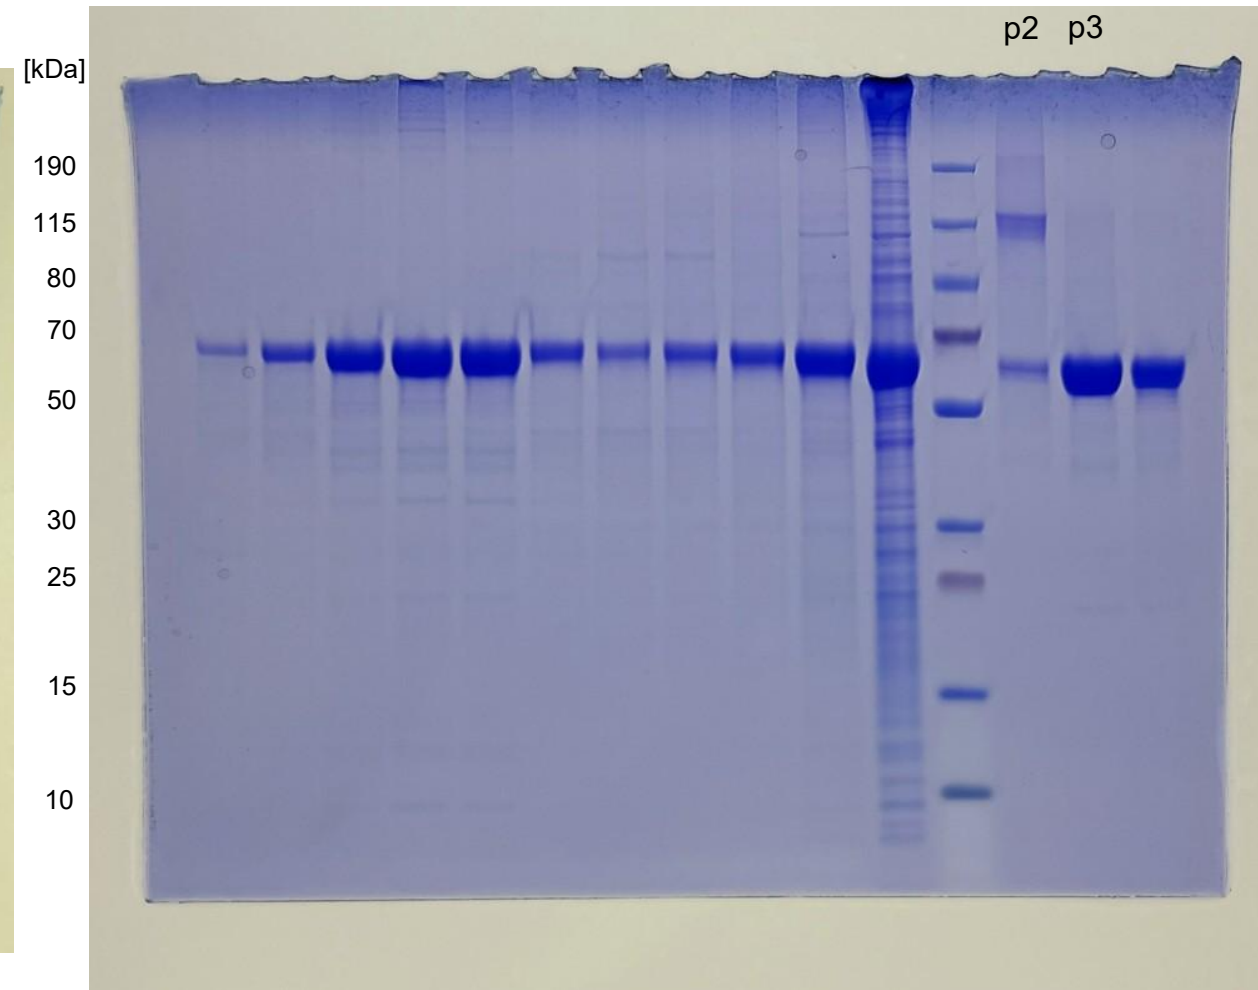

Figure S7c

Western blot analysis of sample before and after activation of PII SVMP.

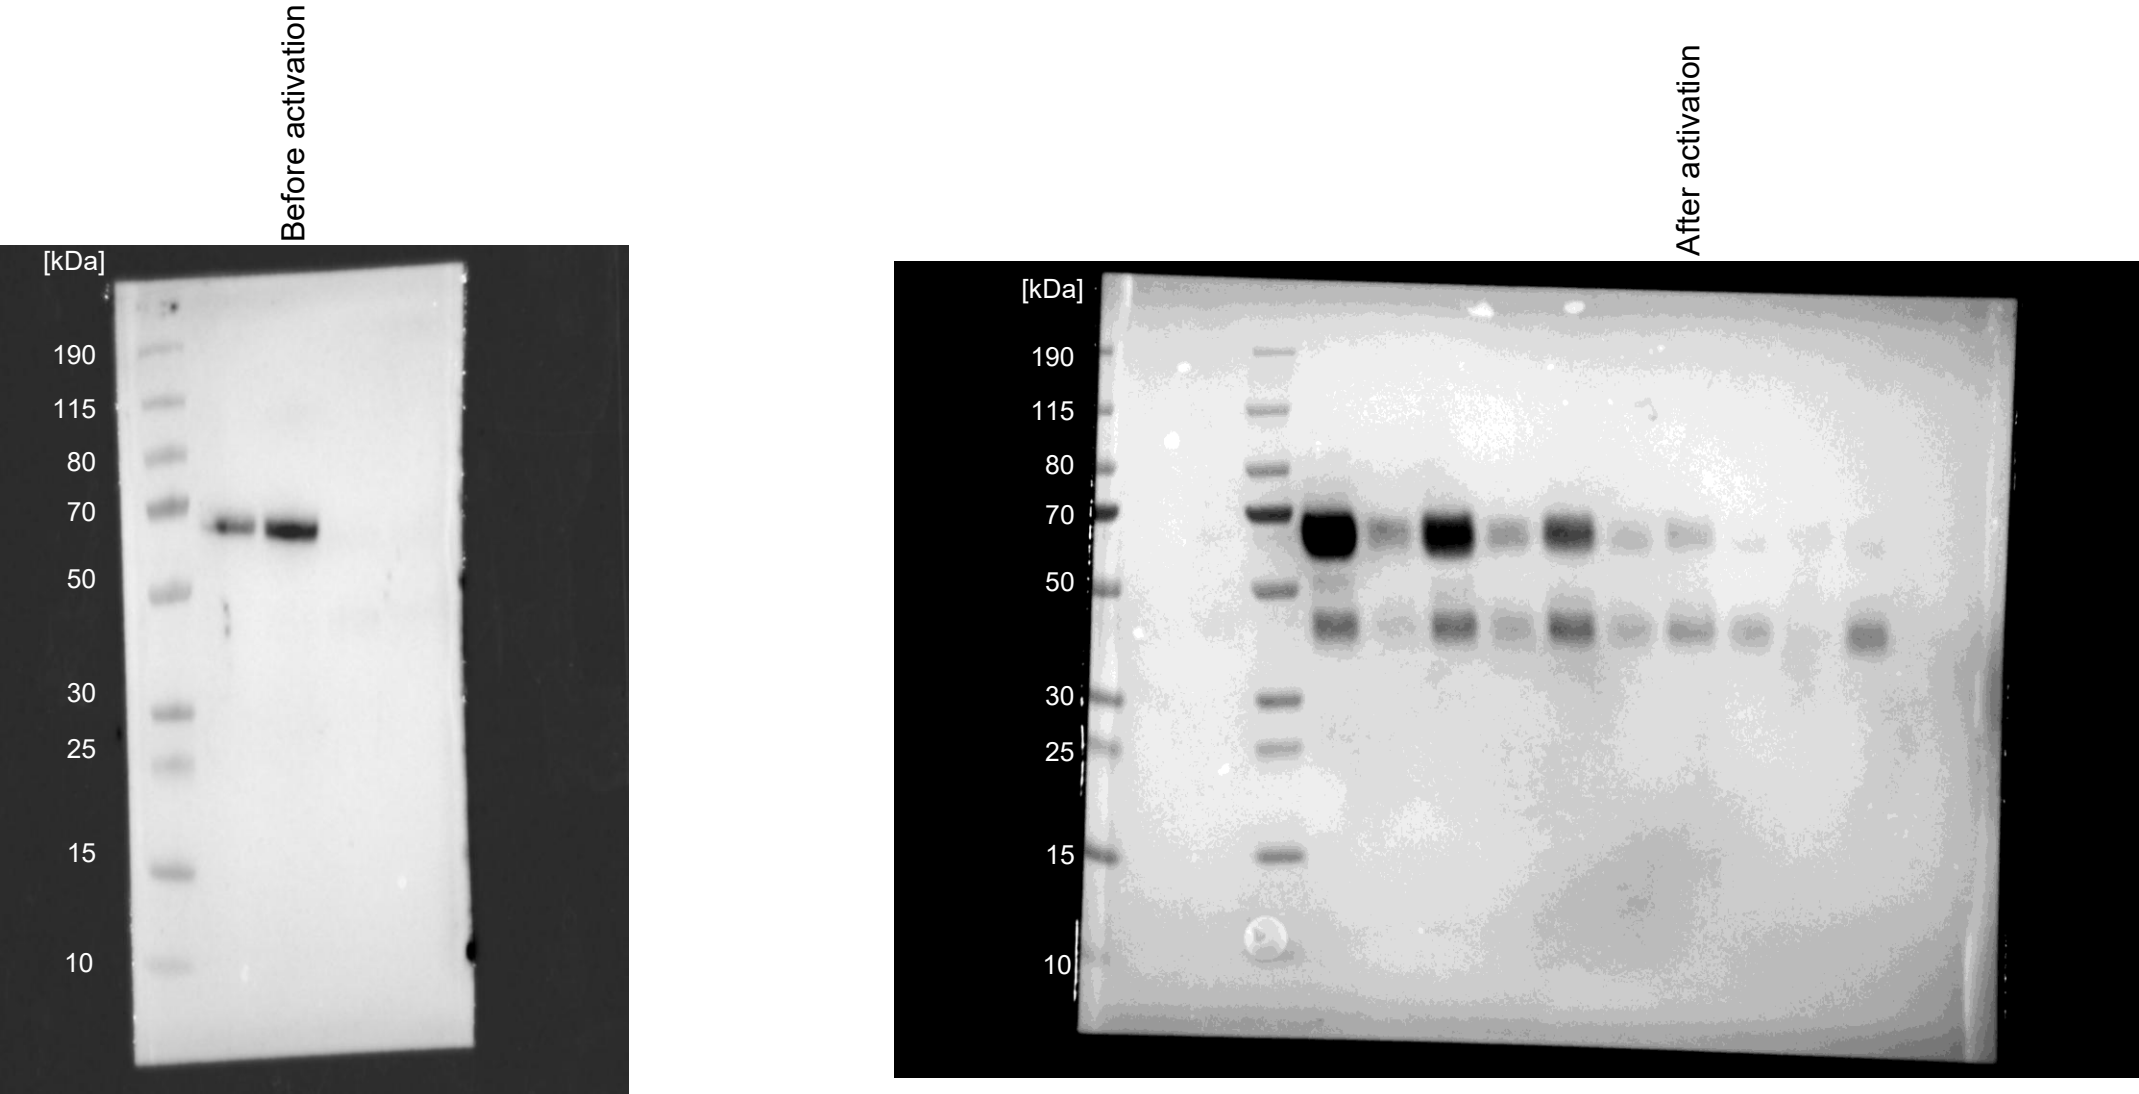

Supplement: fig3-figsupp4-data2 [file Figure 3 supplement 4 - source data 2.pdf › Figure 3 supplement 4 - source data 2/Figure 3 supplement 4 - source data 2.pdf]
