# Supplementary material for: Purified Zymogens Reveal Mechanisms of Snake Venom Metalloproteinase Auto-Activation
Source: eLife journal article supplement (doi:10.7554/elife.109112), 2026-01-21

Figure S9b

PII SVMP zymogen – SDS-PAGE of SEC

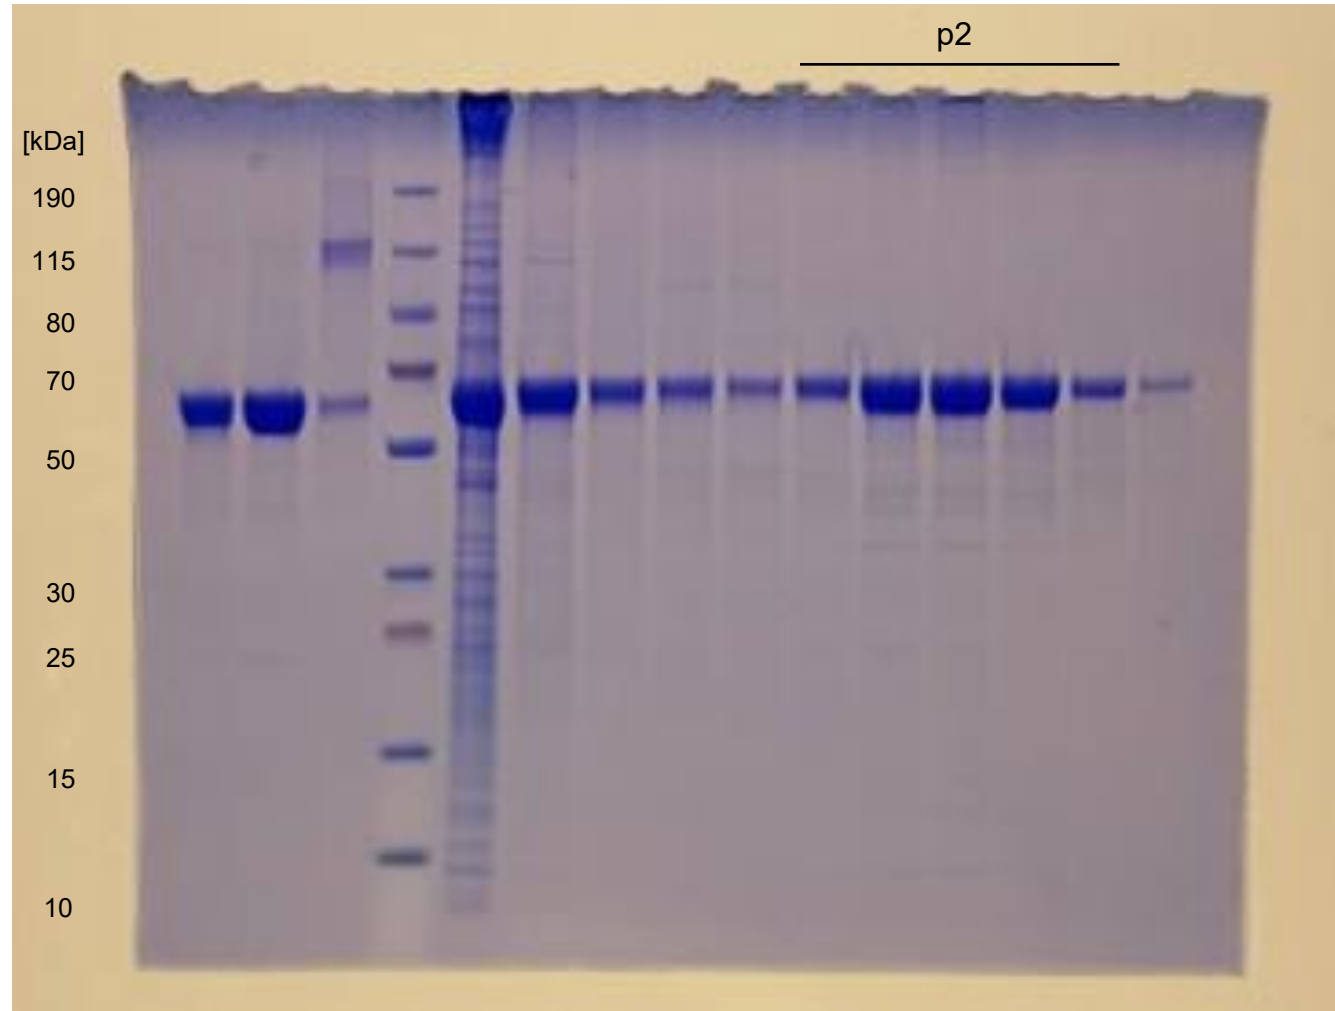

Figure S9c

PIII SVMP zymogen – SDS-PAGE of SEC

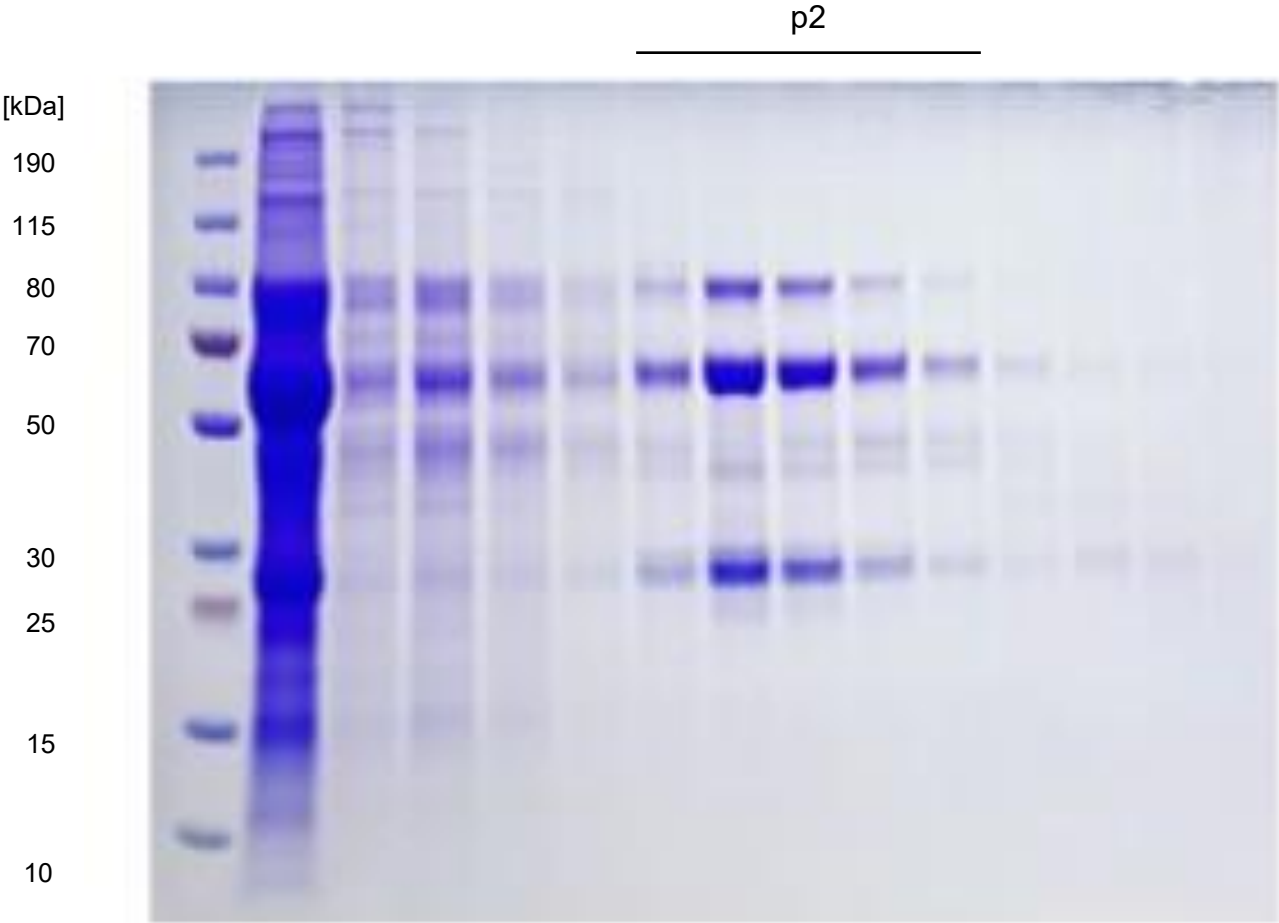

Figure S9d

Fibrinogen degradation assays in the presence of Zn<sup>2+</sup> and increasing amounts of SVMPs PII, PII + hPDI (human PDI) and PII + sPDI (snake PDI)

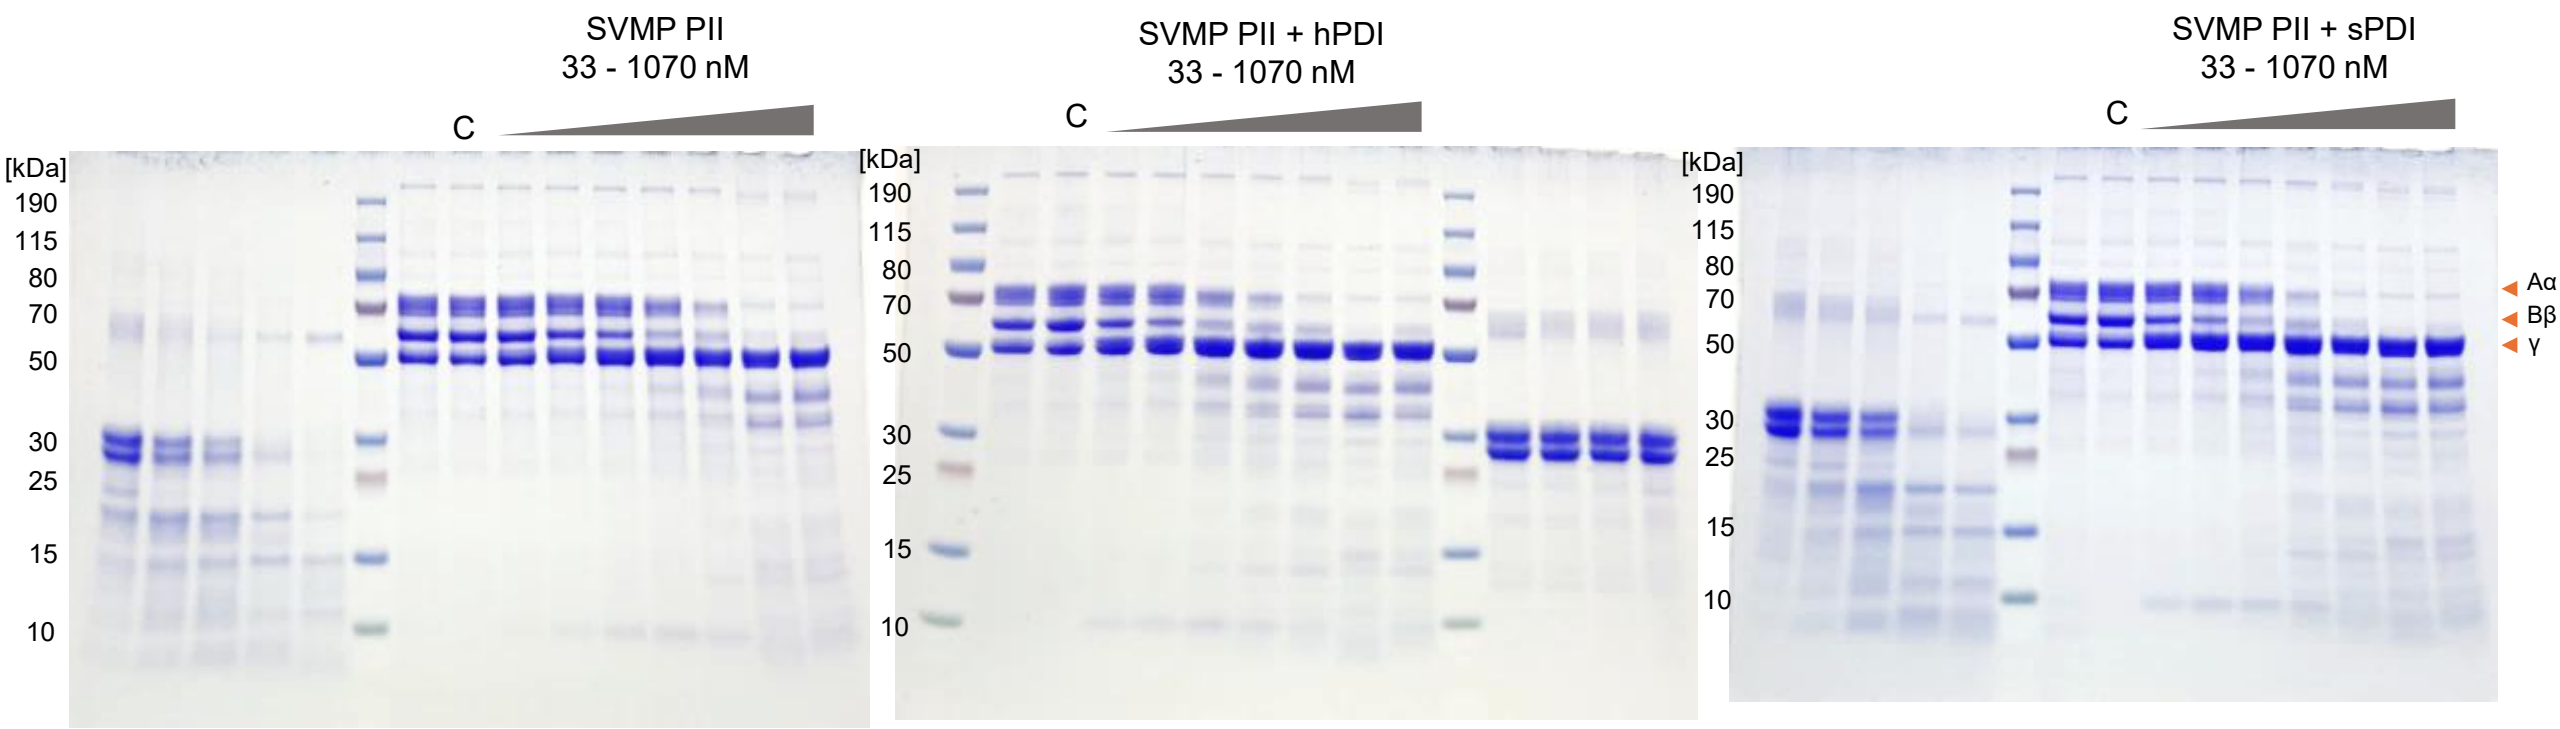

Figure S9e

Fibrinogen degradation assays in the presence of Zn<sup>2+</sup> and increasing amounts of SVMPs PIII, PIII + hPDI and PIII + sPDI

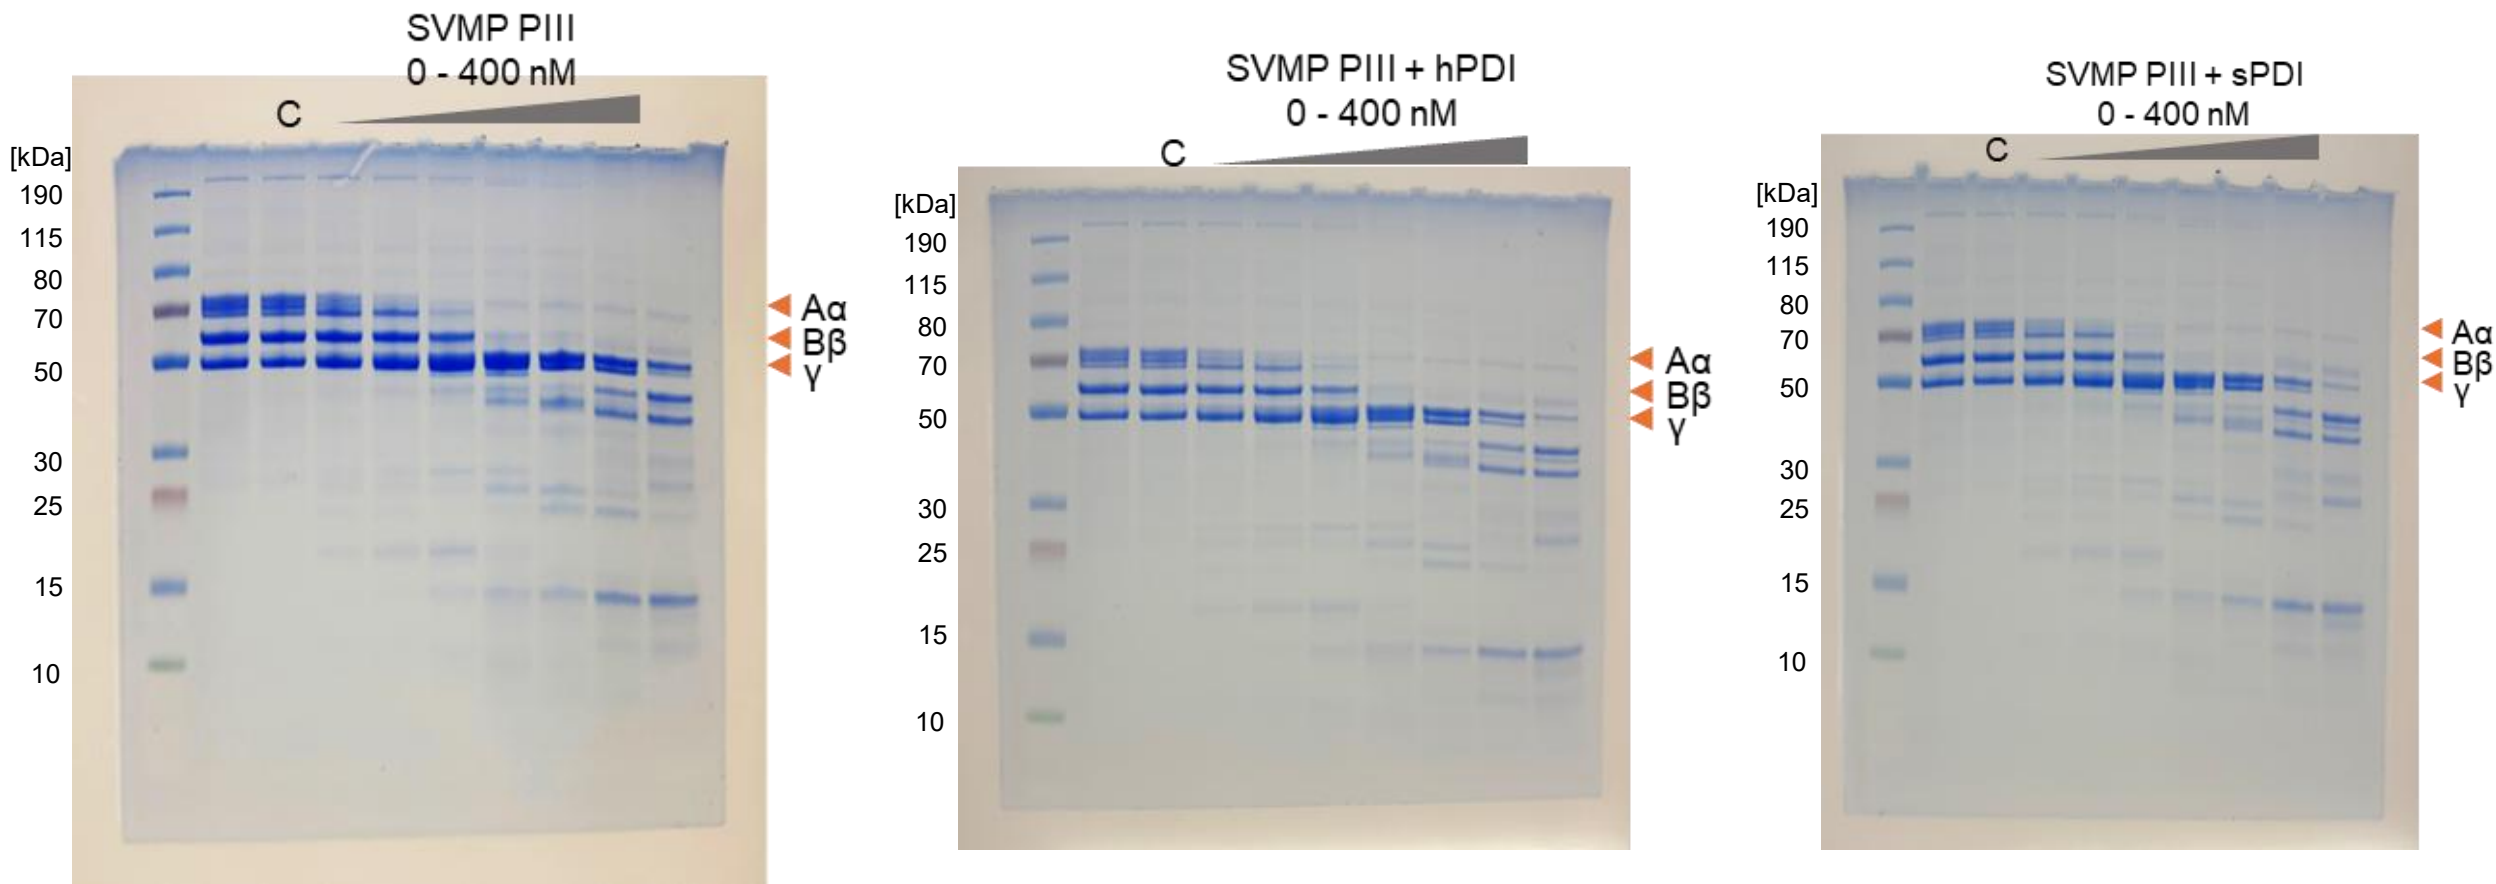

Supplement: fig3-figsupp6-data2 [file Figure 3 supplement 6 - source data 2.pdf › Figure 3 supplement 6 - source data 2/Figure 3 supplement 6 - source data 2.pdf]
