# Supplementary material for: Purified Zymogens Reveal Mechanisms of Snake Venom Metalloproteinase Auto-Activation
Source: eLife journal article supplement (doi:10.7554/elife.109112), 2026-01-21

Figure 4a

SVMP PI – Casein degradation

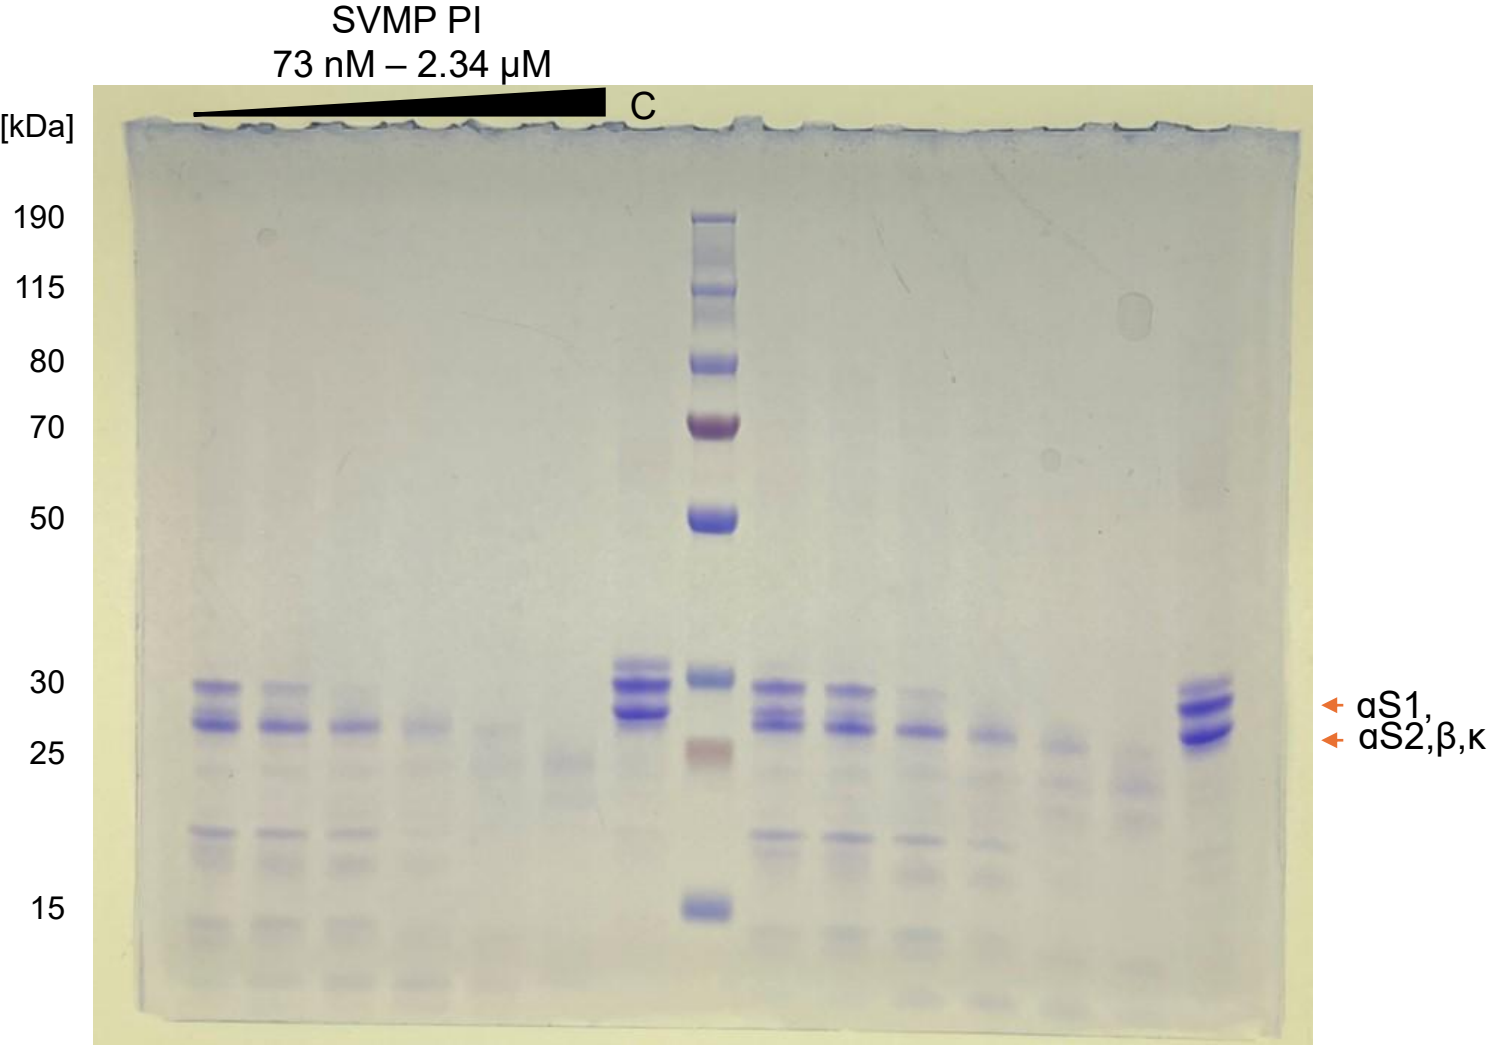

Figure 4b

SVMP PII – Casein degradation

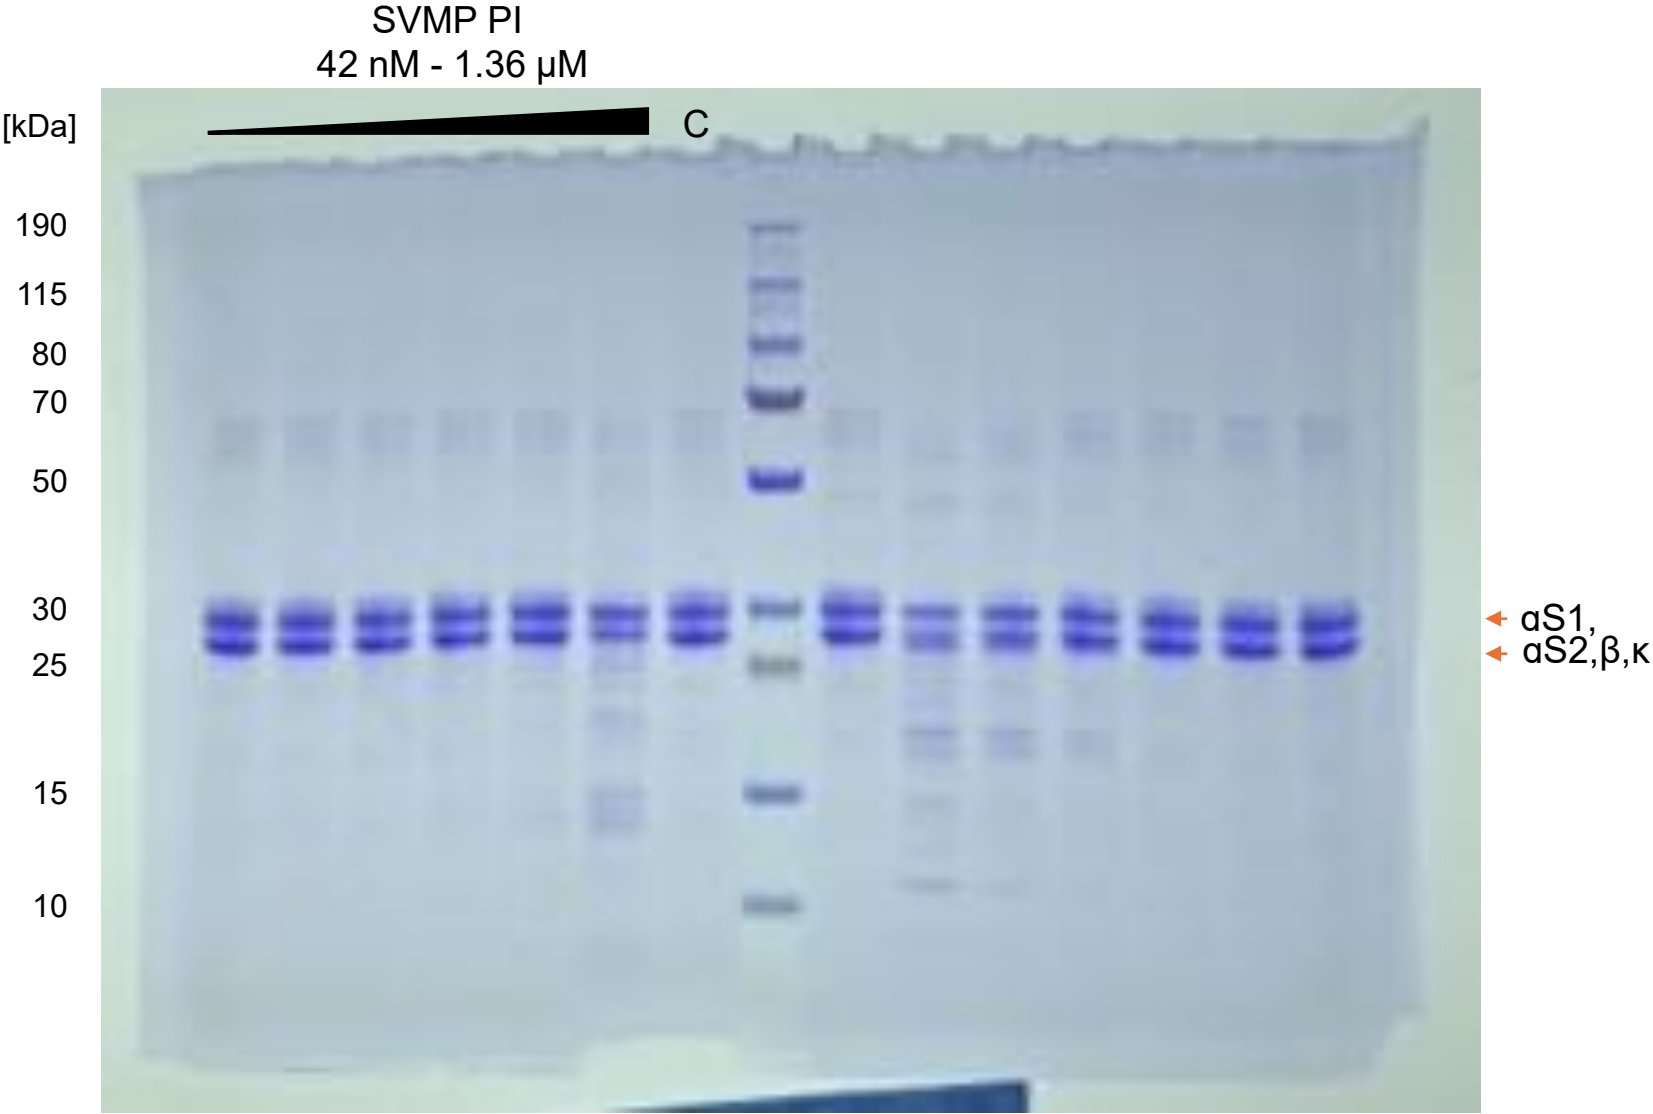

Figure 4c

SVMP PIII – Casein degradation

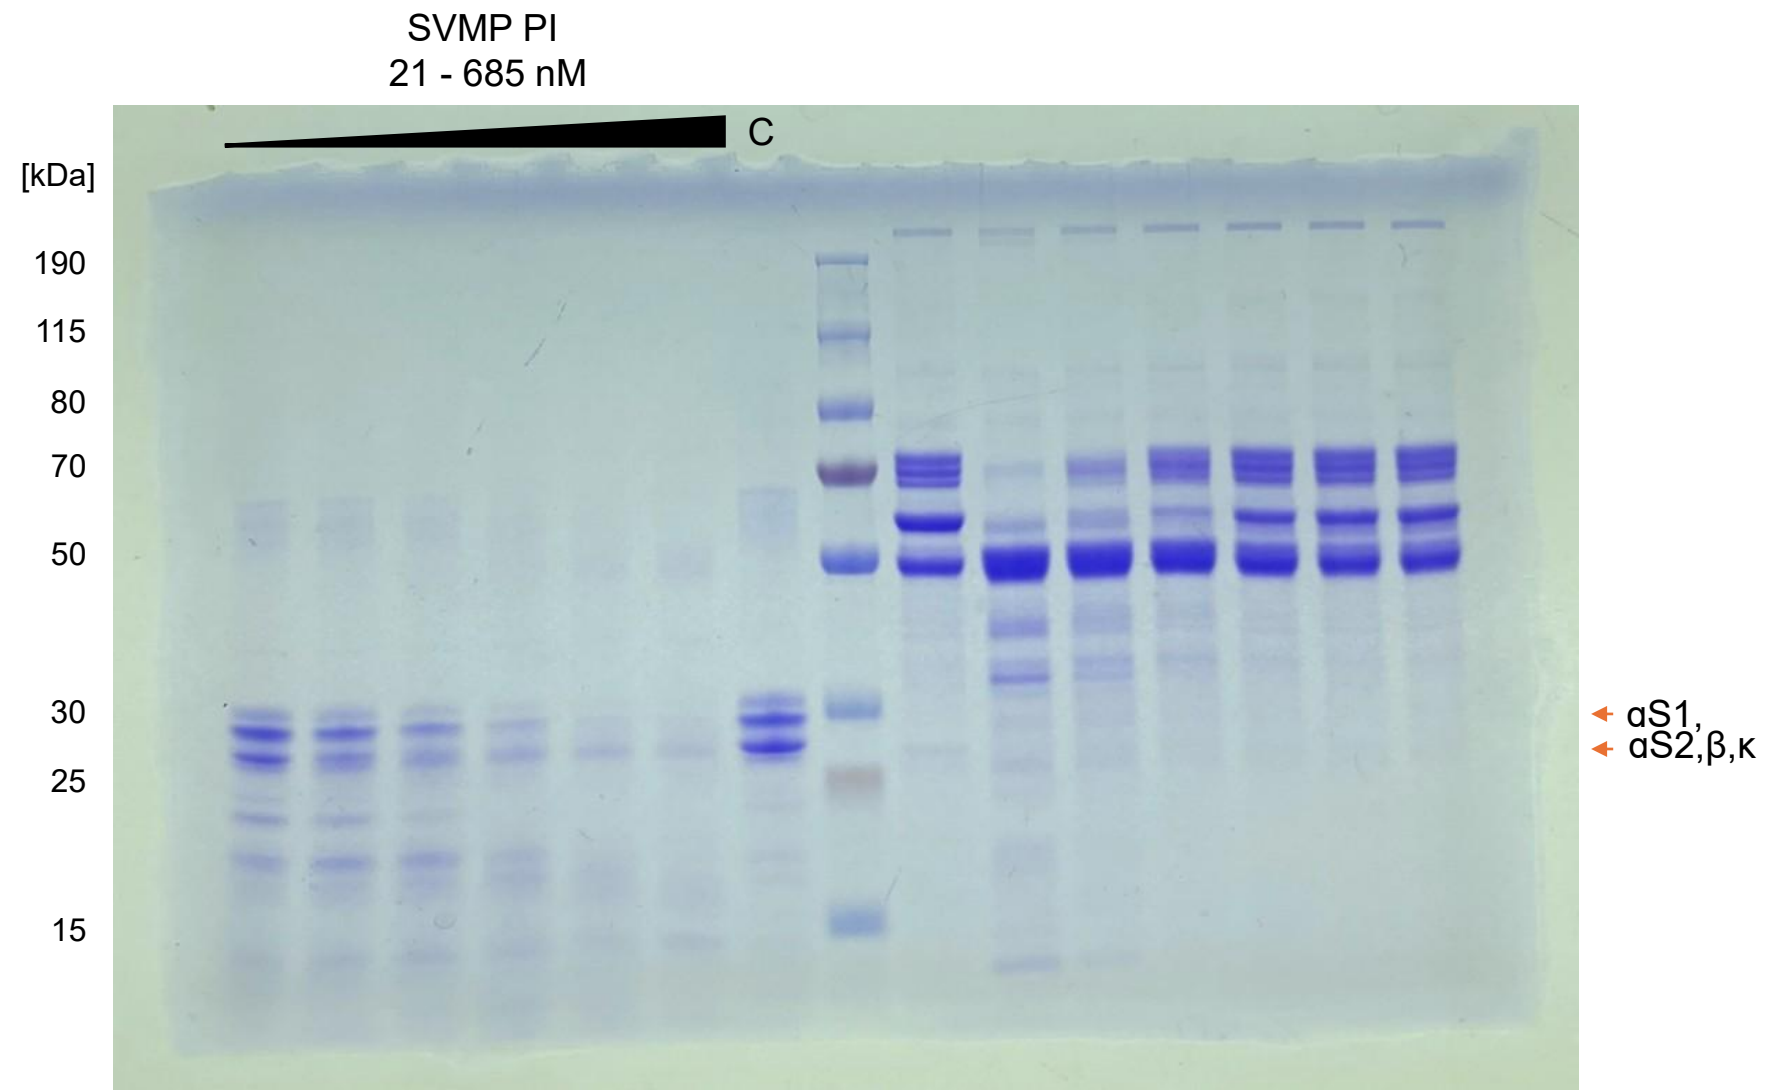

Figure 4d

SVMP PI – Fibrinogen degradation

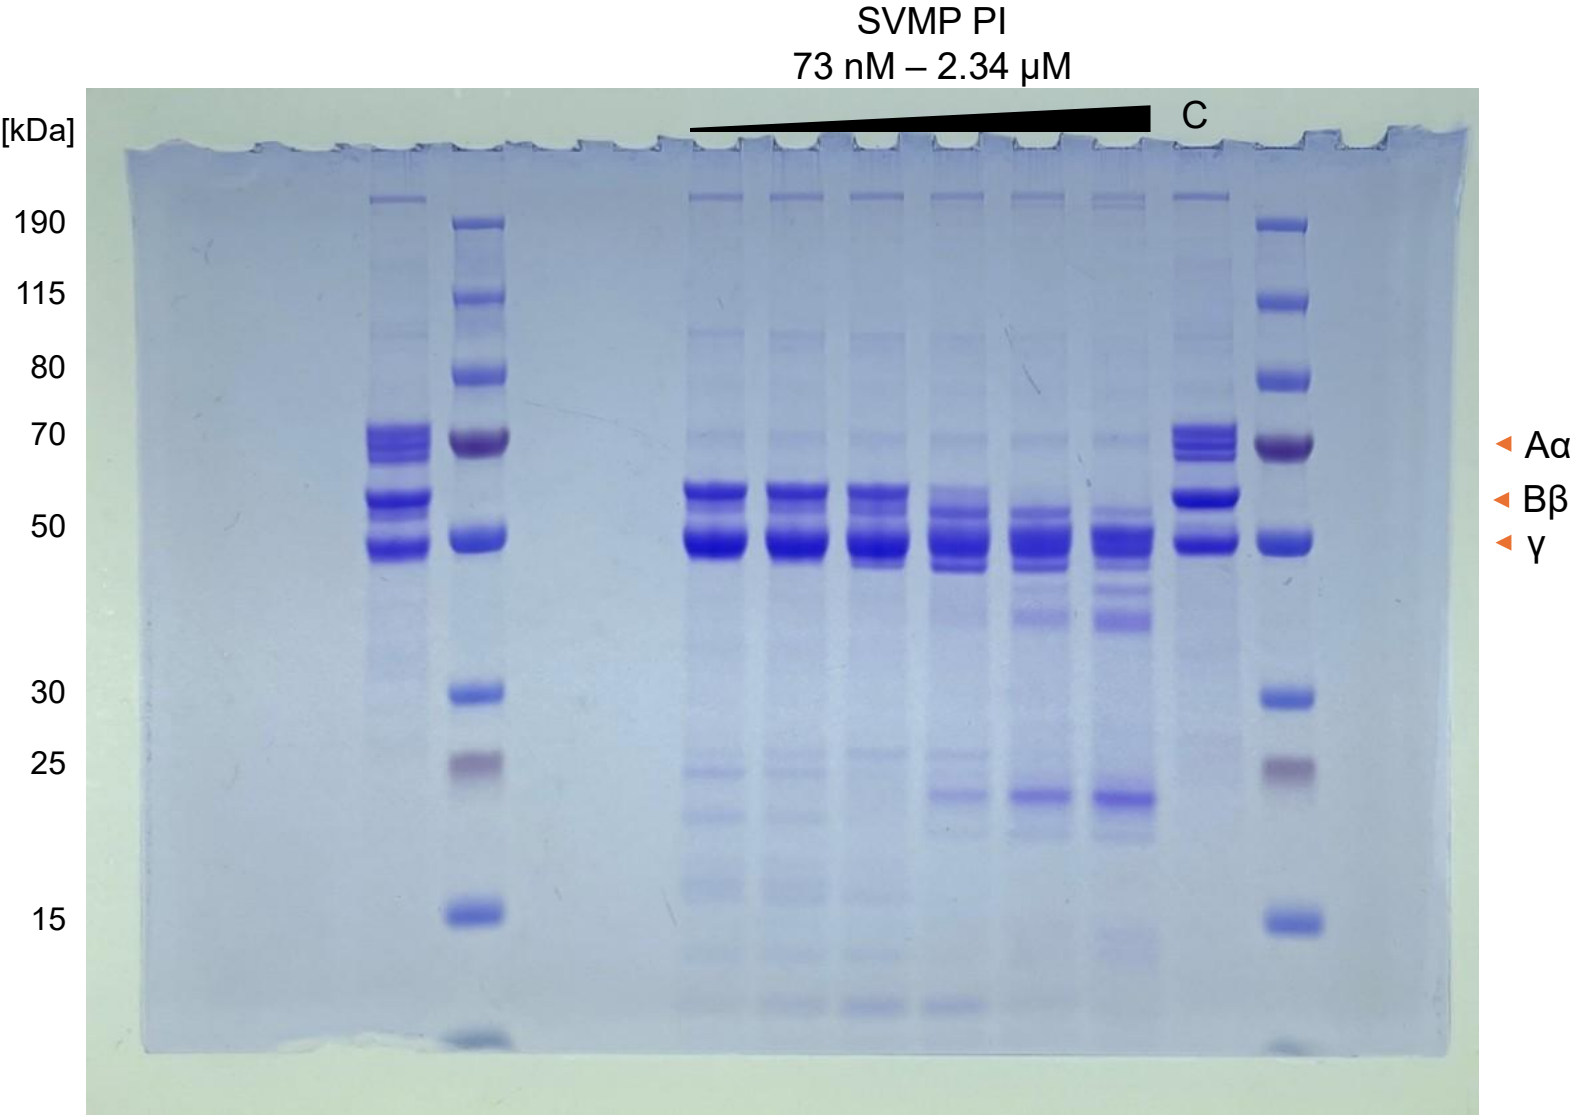

Figure 4e

SVMP PII – Fibrinogen degradation

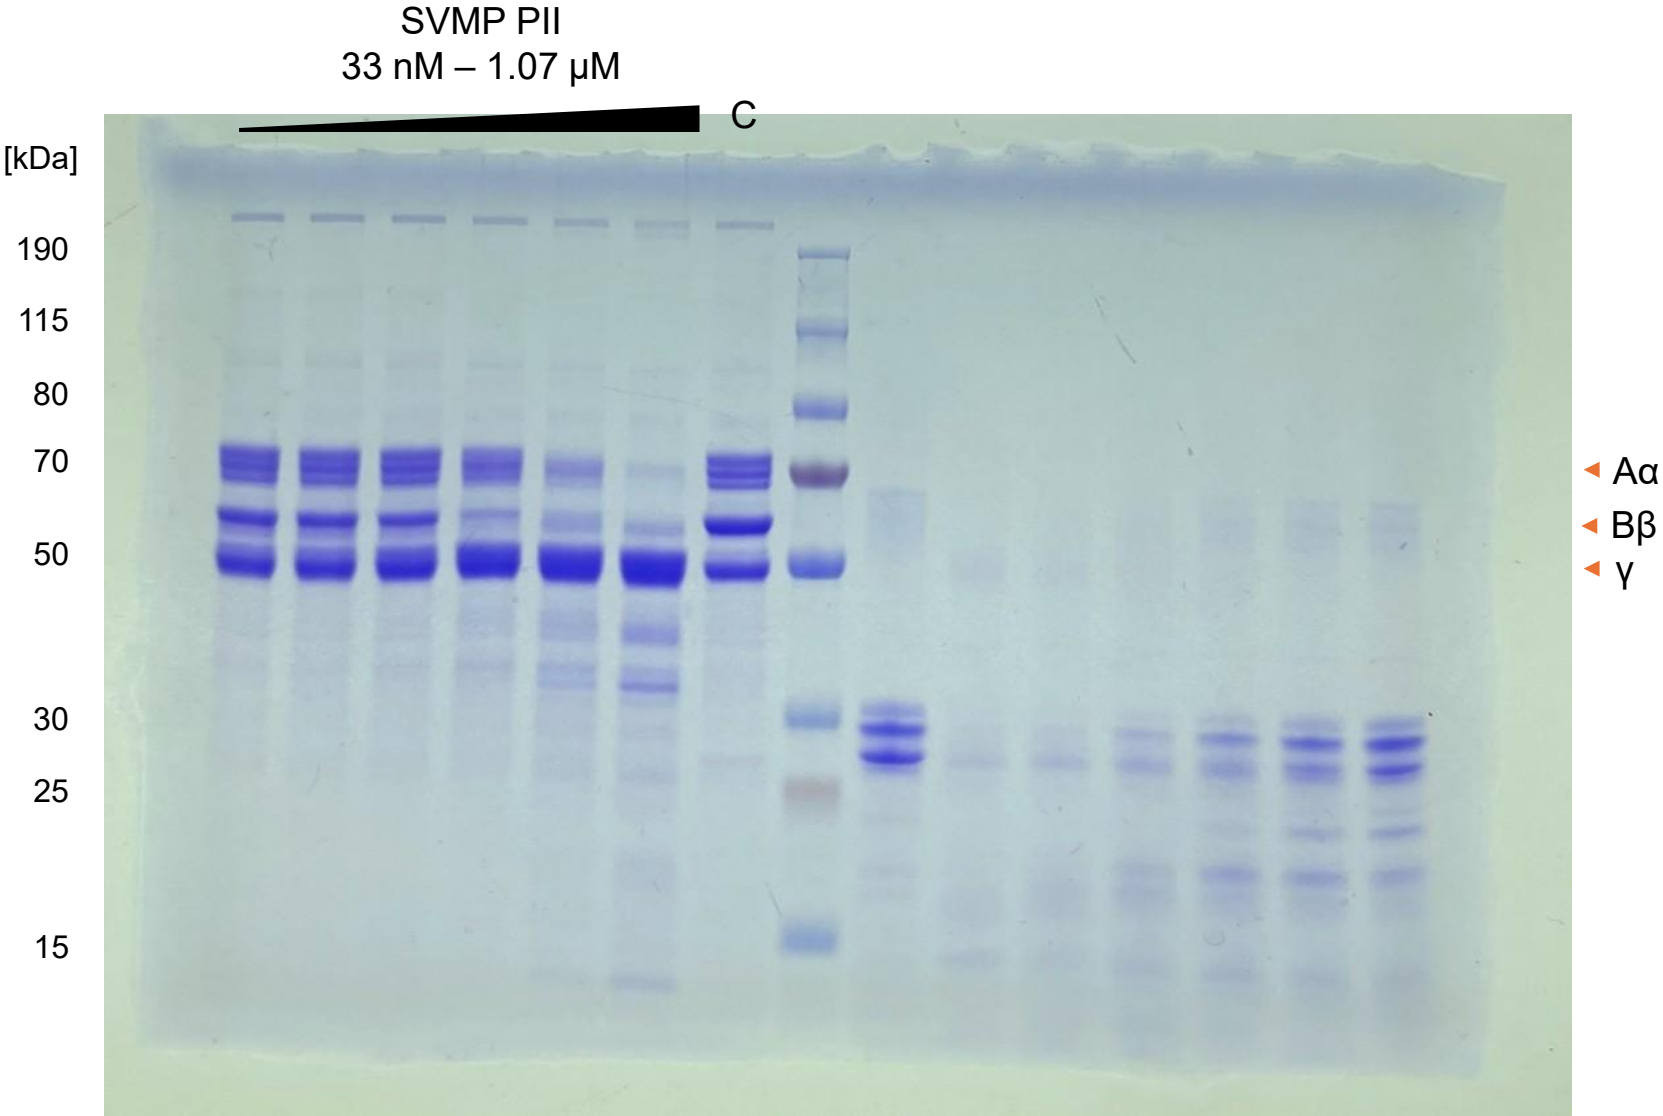

Figure 4f

SVMP PIII – Fibrinogen degradation

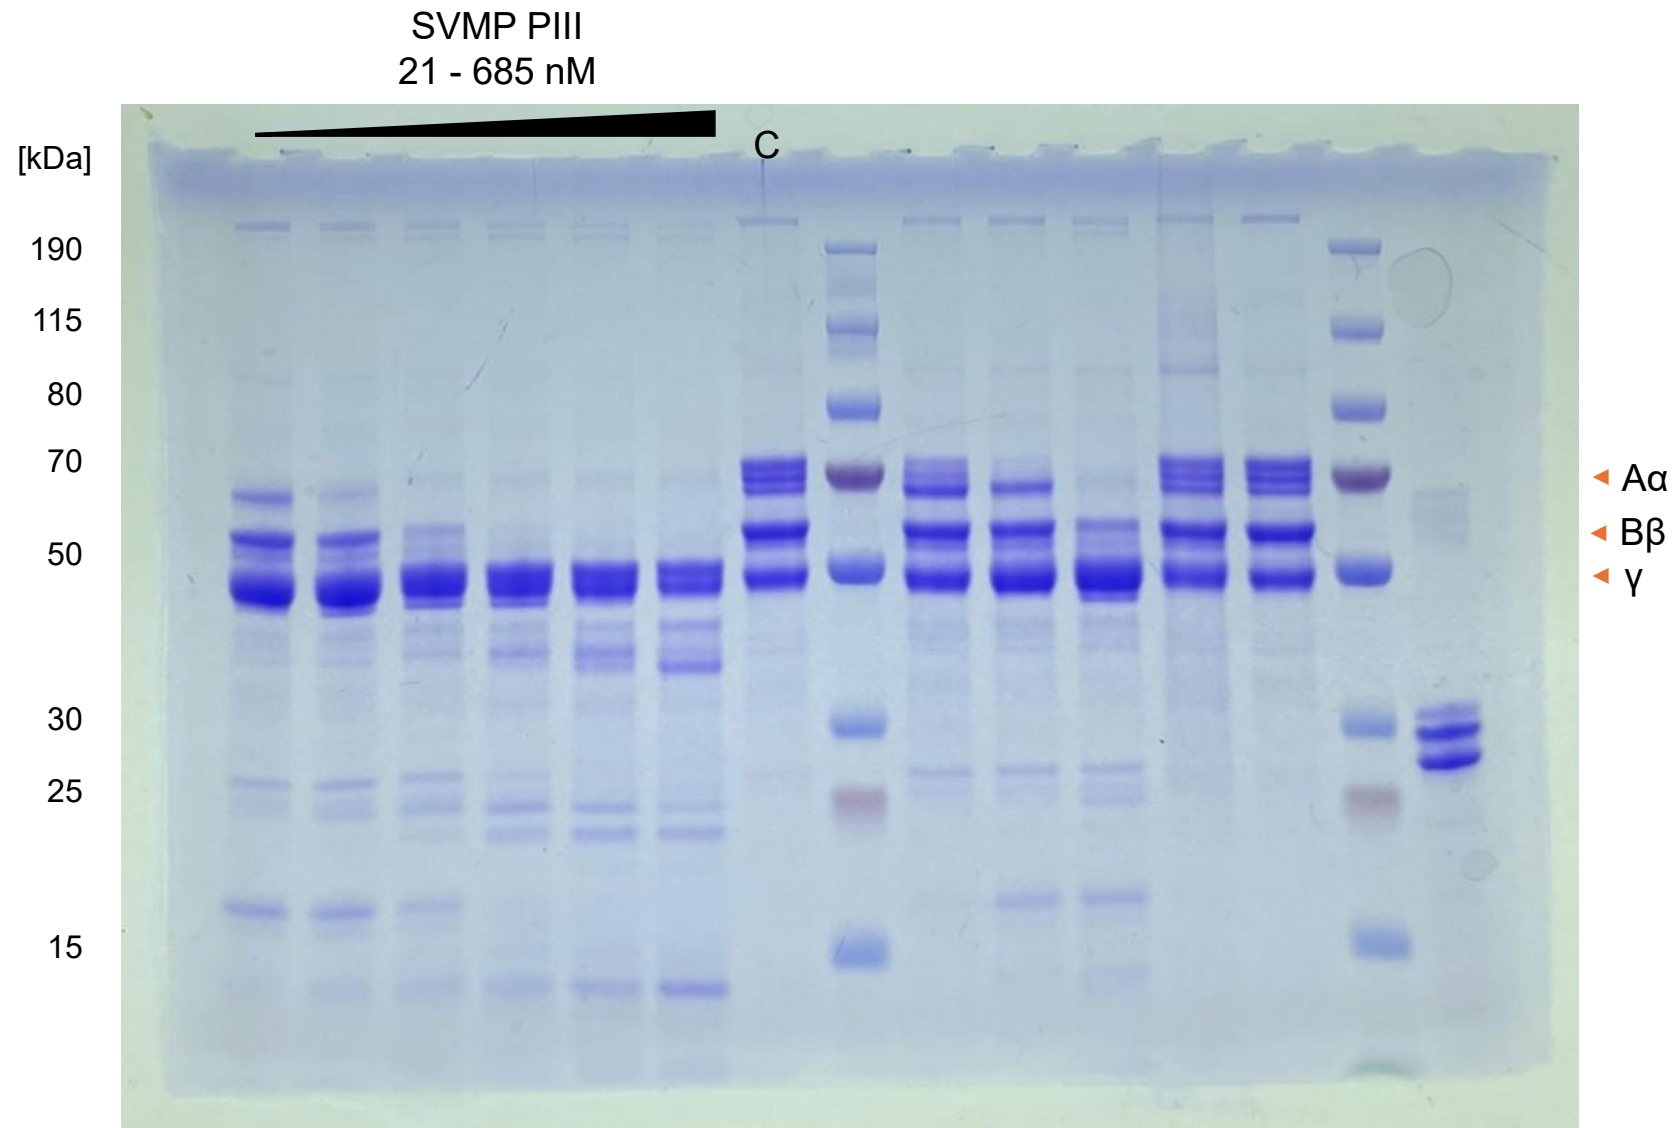

Supplement: fig4-data2 [file Figure 4 - source data 2.pdf › Figure 4 - source data 2.pdf]
