# Supplementary material for: Purified zymogens reveal mechanisms of snake venom metalloproteinase auto-activation
Source: eLife. 2026 Jun 10;15:RP109112. doi: 10.7554/eLife.109112 (PMC13252954; doi:10.7554/eLife.109112)
Supplement: Figure 2—figure supplement 1—source data 3. [file elife-109112-fig2-figsupp1-data3.xlsx]

## Sheet: S2a
cell viability							YFP
	1	100	100	96			2	8954	6894	3675	71164
	2	82	90	97			3	40976	8984	6704	83754
	3	20	39	97			4	33520	4464	2864	90040
	4	0	0	80			5	21304	2720	2512	62796

## Sheet: S2b
cell viability							YFP
	Days	PIII + 3uM Marimastat	PIII + 6uM Marimastat	Control (non-toxic protein)	PIII + 0uM Marimastat			Days	PIII + 3uM Marimastat	PIII + 6uM Marimastat	Control (non-toxic protein)	PIII + 0uM Marimastat
	0	100	100	100	100			1	0	0	0	0
	1	100	100	96	98			2	724	0	71164	9565
	2	29	31	97	68			3	15791	18684	83754	8846
	3	10	9	95	29			4	6656	4670	90040	4038
	4			83	16			5			62796	139
	5			68	6

## Sheet: S2c
cell viability						YFP
	Days	PI mutant	PIII mutant	Control			Days	PI mutant	PIII mutant	Control
	1	100	93	96			1	0	5381	0
	2	95	72	97			2	59161	16760	71164
	3	61	25	95			3	56332	9803	83754
	4	49	0	83			4	22966	2019	90040
	5	50	0	68			5	22903	0	62796

## Sheet: S2d
cell viability						YFP
	Days	PI	PIII	Control			Days	PI	PIII	Control
	1	100	96	96			2	38821	28232	71164
	2	90	77	97			3	34974	25715	83754
	3	81	65	97			4	23564	2914	90040
	4	62	17	80			5	23209	1908	62796
	5	25	10	70
