# Supplementary material for: Purified zymogens reveal mechanisms of snake venom metalloproteinase auto-activation
Source: eLife. 2026 Jun 10;15:RP109112. doi: 10.7554/eLife.109112 (PMC13252954; doi:10.7554/eLife.109112)
Supplement: Figure 2—source data 3. [file elife-109112-fig2-data3.xlsx]

## Sheet: YFP
YFP
	Days	PII_zymogen	PI_zymogen	PIII_zymogen
	1	210	40320	753
	2	8304	98675	27344
	3	95732	99767	41330
	4	98392	100000	51194
	5	99183	100000

## Sheet: cell viability
cell viability
	Days	PII_zymogen	PI_zymogen	PIII_zymogen
	1	100	100	100
	2	100	98	100
	3	98	83	94
	4	86	80	67
	5	73	75
