# Supplementary material for: Purified zymogens reveal mechanisms of snake venom metalloproteinase auto-activation
Source: eLife. 2026 Jun 10;15:RP109112. doi: 10.7554/eLife.109112 (PMC13252954; doi:10.7554/eLife.109112)
Supplement: Figure 3—figure supplement 1—source data 3. [file elife-109112-fig3-figsupp1-data3.xlsx]

## Sheet: Proteins
Protein FDR Confidence	Accession	Description	Contaminant	Hi5	SH Sequences	Coverage	# Peptides	# PSMs	# Unique Peptides	Area: F2: Sample	Score Sequest HT	MW [kDa]	calc. pI
High	Q2UXQ3+tags	Q2UXQ3+tags Q2UXQ3+tags	FALSE	FALSE	TRUE	59.5918	27	1087	27	8.53189e+10	2337.7	55.1	5.82
	Confidence	Annotated Sequence	# Protein Groups	# Proteins	Master Protein Accessions	Protein Accessions	Protein Descriptions	Charge	m/z [Da]	MH+ [Da]	RT [min]	55.1	5.82
	High	[R].GETYLIEPLKVPDSESHAVYK.[Y]	1	1	Q2UXQ3+tags	Q2UXQ3+tags	Q2UXQ3+tags Q2UXQ3+tags	4	594.559	2375.21	31.4401	1.83
	High	[R].GETYLIEPLKVPDSESHAVYK.[Y]	1	1	Q2UXQ3+tags	Q2UXQ3+tags	Q2UXQ3+tags Q2UXQ3+tags	2	1188.11	2375.21	31.4532	4.06	4.3323e+07
	High	[K].SGNVNDYEVVNPQK.[I]	1	1	Q2UXQ3+tags	Q2UXQ3+tags	Q2UXQ3+tags Q2UXQ3+tags	2	781.877	1562.75	31.4926	3.91	3.31062e+06
	High	[R].GETYLIEPLK.[V]	1	1	Q2UXQ3+tags	Q2UXQ3+tags	Q2UXQ3+tags Q2UXQ3+tags	2	581.82	1162.63	45.3385	2.32	278331
	High	[R].TDTVSTPVSENELLQFLR.[A]	1	1	Q2UXQ3+tags	Q2UXQ3+tags	Q2UXQ3+tags Q2UXQ3+tags	3	683.688	2049.05	45.3377	3.28	2.41225e+07
	High	[R].TDTVSTPVSENELLQFLR.[A]	1	1	Q2UXQ3+tags	Q2UXQ3+tags	Q2UXQ3+tags Q2UXQ3+tags	2	1025.03	2049.05	45.328	3.64	4.55299e+07
	High	[K].ITGLPVGAVK.[Q]	1	1	Q2UXQ3+tags	Q2UXQ3+tags	Q2UXQ3+tags Q2UXQ3+tags	2	477.803	954.598	31.7167	1.32	1.17013e+07
	High	[R].WNDLQGGSGLNDIFEAQK.[I]	1	1	Q2UXQ3+tags	Q2UXQ3+tags	Q2UXQ3+tags Q2UXQ3+tags	2	996.478	1991.95	45.3093	3.3	109314
	High	[R].IQNDADSTASISAcNGLK.[G]	1	1	Q2UXQ3+tags	Q2UXQ3+tags	Q2UXQ3+tags Q2UXQ3+tags	2	932.94	1864.87	31.8005	3.92
	High	[R].YIQLVIVADHAmVTK.[N]	1	1	Q2UXQ3+tags	Q2UXQ3+tags	Q2UXQ3+tags Q2UXQ3+tags	3	572.984	1716.94	31.8196	1.78
	High	[R].YIQLVIVADHAmVTK.[N]	1	1	Q2UXQ3+tags	Q2UXQ3+tags	Q2UXQ3+tags Q2UXQ3+tags	2	858.972	1716.94	31.8338	2.35
	High	[R].AQDSYHFSDcSK.[N]	1	1	Q2UXQ3+tags	Q2UXQ3+tags	Q2UXQ3+tags Q2UXQ3+tags	3	482.198	1444.58	31.8495	3.09	1.77687e+06
	High	[R].AVSDDmDDYcSGITSDcAR.[N]	1	1	Q2UXQ3+tags	Q2UXQ3+tags	Q2UXQ3+tags Q2UXQ3+tags	2	1077.4	2153.8	31.8513	3.15	976382
	High	[R].GETYLIEPLKVPDSESHAVYK.[Y]	1	1	Q2UXQ3+tags	Q2UXQ3+tags	Q2UXQ3+tags Q2UXQ3+tags	3	792.412	2375.22	31.8639	2.91	757141813
	High	[R].ITHDNAQLLTAVNLNGDTIGR.[A]	1	1	Q2UXQ3+tags	Q2UXQ3+tags	Q2UXQ3+tags Q2UXQ3+tags	3	746.062	2236.17	45.0653	3.71	114848
	High	[R].GETYLIEPLKVPDSESHAVYK.[Y]	1	1	Q2UXQ3+tags	Q2UXQ3+tags	Q2UXQ3+tags Q2UXQ3+tags	2	1188.11	2375.22	31.9556	2.98	3.85754e+07
	High	[R].GETYLIEPLKVPDSESHAVYK.[Y]	1	1	Q2UXQ3+tags	Q2UXQ3+tags	Q2UXQ3+tags Q2UXQ3+tags	3	792.409	2375.21	31.3621	3.09	3.70049e+10
	High	[R].YIQLVIVADHAmVTK.[N]	1	1	Q2UXQ3+tags	Q2UXQ3+tags	Q2UXQ3+tags Q2UXQ3+tags	2	858.971	1716.94	31.3262	3.28	5217591374
	High	[R].AQDSYHFSDcSK.[N]	1	1	Q2UXQ3+tags	Q2UXQ3+tags	Q2UXQ3+tags Q2UXQ3+tags	2	722.794	1444.58	45.6436	2.5	176511
	High	[K].mcGVTLTNWESDKPIK.[K]	1	1	Q2UXQ3+tags	Q2UXQ3+tags	Q2UXQ3+tags Q2UXQ3+tags	2	947.957	1894.91	30.7042	2.91	836181
	High	[R].YIQLVIVADHAmVTK.[N]	1	1	Q2UXQ3+tags	Q2UXQ3+tags	Q2UXQ3+tags Q2UXQ3+tags	3	572.984	1716.94	30.8101	2.96	1.47525e+08
	High	[R].ITHDNAQLLTAVNLNGDTIGR.[A]	1	1	Q2UXQ3+tags	Q2UXQ3+tags	Q2UXQ3+tags Q2UXQ3+tags	3	746.062	2236.17	45.572	4.53	304103
	High	[R].YIQLVIVADHAmVTK.[N]	1	1	Q2UXQ3+tags	Q2UXQ3+tags	Q2UXQ3+tags Q2UXQ3+tags	2	858.973	1716.94	30.8248	3.43	3.17377e+07
	High	[R].AVSDDMDDYcSGITSDcAR.[N]	1	1	Q2UXQ3+tags	Q2UXQ3+tags	Q2UXQ3+tags Q2UXQ3+tags	2	1069.41	2137.81	30.8265	2.87	1.54877e+06
	High	[K].SGNVNDYEVVNPQK.[I]	1	1	Q2UXQ3+tags	Q2UXQ3+tags	Q2UXQ3+tags Q2UXQ3+tags	2	781.876	1562.75	45.5372	3.01
	High	[R].AVSDDmDDYcSGITSDcAR.[N]	1	1	Q2UXQ3+tags	Q2UXQ3+tags	Q2UXQ3+tags Q2UXQ3+tags	2	1077.41	2153.81	30.8702	3.37	2.3864e+06
	High	[R].IQNDADSTASISAcNGLK.[G]	1	1	Q2UXQ3+tags	Q2UXQ3+tags	Q2UXQ3+tags Q2UXQ3+tags	2	932.94	1864.87	45.5153	2.73	288547
	High	[K].ASHLVATSEQQHFDPR.[Y]	1	1	Q2UXQ3+tags	Q2UXQ3+tags	Q2UXQ3+tags Q2UXQ3+tags	4	456.476	1822.88	45.4485	2.9	1.33175e+06
	High	[R].EILNSFGEWR.[Q]	1	1	Q2UXQ3+tags	Q2UXQ3+tags	Q2UXQ3+tags Q2UXQ3+tags	2	625.812	1250.62	45.4416	2.26	2.48127e+06
	High	[R].GETYLIEPLKVPDSESHAVYK.[Y]	1	1	Q2UXQ3+tags	Q2UXQ3+tags	Q2UXQ3+tags Q2UXQ3+tags	4	594.559	2375.21	30.9354	2.76	4.56577e+10
	High	[K].ITGLPVGAVK.[Q]	1	1	Q2UXQ3+tags	Q2UXQ3+tags	Q2UXQ3+tags Q2UXQ3+tags	2	477.803	954.598	45.4162	1.04	2.16075e+06
	High	[R].GETYLIEPLKVPDSESHAVYK.[Y]	1	1	Q2UXQ3+tags	Q2UXQ3+tags	Q2UXQ3+tags Q2UXQ3+tags	2	1188.11	2375.21	30.9512	4.46	9053989298
	High	[K].SGNVNDYEVVNPQK.[I]	1	1	Q2UXQ3+tags	Q2UXQ3+tags	Q2UXQ3+tags Q2UXQ3+tags	2	781.875	1562.74	30.986	3.25	4.94612e+06
	High	[R].GETYLIEPLKVPDSESHAVYK.[Y]	1	1	Q2UXQ3+tags	Q2UXQ3+tags	Q2UXQ3+tags Q2UXQ3+tags	5	475.848	2375.21	31.1174	2.41	7.45414e+07
	High	[K].ITGLPVGAVK.[Q]	1	1	Q2UXQ3+tags	Q2UXQ3+tags	Q2UXQ3+tags Q2UXQ3+tags	2	477.803	954.599	31.2118	1.87	1.80363e+07
	High	[R].YIQLVIVADHAmVTK.[N]	1	1	Q2UXQ3+tags	Q2UXQ3+tags	Q2UXQ3+tags Q2UXQ3+tags	3	572.983	1716.94	45.3694	2.04	557001
	High	[R].IQNDADSTASISAcNGLK.[G]	1	1	Q2UXQ3+tags	Q2UXQ3+tags	Q2UXQ3+tags Q2UXQ3+tags	2	932.935	1864.86	31.2966	3.5	1.44557e+06
	High	[R].YIQLVIVADHAmVTK.[N]	1	1	Q2UXQ3+tags	Q2UXQ3+tags	Q2UXQ3+tags Q2UXQ3+tags	3	572.985	1716.94	31.3132	2.13	18784975757
	High	[K].SGNVNDYEVVNPQK.[I]	1	1	Q2UXQ3+tags	Q2UXQ3+tags	Q2UXQ3+tags Q2UXQ3+tags	2	781.877	1562.75	31.9974	3.75	2.53711e+06
	High	[R].IQNDADSTASISAcNGLK.[G]	1	1	Q2UXQ3+tags	Q2UXQ3+tags	Q2UXQ3+tags Q2UXQ3+tags	2	932.94	1864.87	45.008	3.4	202937
	High	[R].GETYLIEPLKVPDSESHAVYK.[Y]	1	1	Q2UXQ3+tags	Q2UXQ3+tags	Q2UXQ3+tags Q2UXQ3+tags	3	792.41	2375.21	44.3387	3.37	771409
	High	[R].AQDSYHFSDcSK.[N]	1	1	Q2UXQ3+tags	Q2UXQ3+tags	Q2UXQ3+tags Q2UXQ3+tags	3	482.198	1444.58	32.8899	1.97	2.82162e+06
	High	[R].WNDLQGGSGLNDIFEAQK.[I]	1	1	Q2UXQ3+tags	Q2UXQ3+tags	Q2UXQ3+tags Q2UXQ3+tags	2	996.477	1991.95	44.3036	3.5	264573
	High	[R].YIQLVIVADHAmVTK.[N]	1	1	Q2UXQ3+tags	Q2UXQ3+tags	Q2UXQ3+tags Q2UXQ3+tags	3	572.983	1716.94	44.0941	2.58	331329
	High	[R].GETYLIEPLKVPDSESHAVYK.[Y]	1	1	Q2UXQ3+tags	Q2UXQ3+tags	Q2UXQ3+tags Q2UXQ3+tags	4	594.559	2375.22	32.9554	3.08
	High	[R].YIQLVIVADHAmVTK.[N]	1	1	Q2UXQ3+tags	Q2UXQ3+tags	Q2UXQ3+tags Q2UXQ3+tags	3	572.983	1716.94	32.9889	3.14	8.87838e+06
	High	[R].AVSDDmDDYcSGITSDcAR.[N]	1	1	Q2UXQ3+tags	Q2UXQ3+tags	Q2UXQ3+tags Q2UXQ3+tags	2	1077.41	2153.81	32.9936	3.49
	High	[R].YIQLVIVADHAmVTK.[N]	1	1	Q2UXQ3+tags	Q2UXQ3+tags	Q2UXQ3+tags Q2UXQ3+tags	2	858.971	1716.93	32.9976	2.92	4.66487e+06
	High	[K].SGNVNDYEVVNPQK.[I]	1	1	Q2UXQ3+tags	Q2UXQ3+tags	Q2UXQ3+tags Q2UXQ3+tags	2	781.878	1562.75	33.0067	3.84	2.20533e+06
	High	[R].ITHDNAQLLTAVNLNGDTIGR.[A]	1	1	Q2UXQ3+tags	Q2UXQ3+tags	Q2UXQ3+tags Q2UXQ3+tags	2	1118.59	2236.17	33.0418	4.79	6.36438e+08
	High	[R].WNDLQGGSGLNDIFEAQK.[I]	1	1	Q2UXQ3+tags	Q2UXQ3+tags	Q2UXQ3+tags Q2UXQ3+tags	3	664.653	1991.94	44.0284	3.42	73495.8
	High	[K].SGNVNDYEVVNPQK.[I]	1	1	Q2UXQ3+tags	Q2UXQ3+tags	Q2UXQ3+tags Q2UXQ3+tags	2	781.877	1562.75	44.0273	2.65	43150.4
	High	[R].ITHDNAQLLTAVNLNGDTIGR.[A]	1	1	Q2UXQ3+tags	Q2UXQ3+tags	Q2UXQ3+tags Q2UXQ3+tags	4	559.798	2236.17	33.1158	4.53	3.31726e+07
	High	[R].ITHDNAQLLTAVNLNGDTIGR.[A]	1	1	Q2UXQ3+tags	Q2UXQ3+tags	Q2UXQ3+tags Q2UXQ3+tags	3	746.065	2236.18	33.1873	4.02	6214946145
	High	[K].ASHLVATSEQQHFDPR.[Y]	1	1	Q2UXQ3+tags	Q2UXQ3+tags	Q2UXQ3+tags Q2UXQ3+tags	4	456.476	1822.88	33.2914	2.71	4.06967e+06
	High	[R].IQNDADSTASISAcNGLK.[G]	1	1	Q2UXQ3+tags	Q2UXQ3+tags	Q2UXQ3+tags Q2UXQ3+tags	2	932.941	1864.88	33.3268	3.24	2.17713e+06
	High	[K].ASHLVATSEQQHFDPR.[Y]	1	1	Q2UXQ3+tags	Q2UXQ3+tags	Q2UXQ3+tags Q2UXQ3+tags	4	456.476	1822.88	32.7882	2.5	8.11875e+06
	High	[K].mcGVTLTNWESDKPIK.[K]	1	1	Q2UXQ3+tags	Q2UXQ3+tags	Q2UXQ3+tags Q2UXQ3+tags	3	632.306	1894.9	30.6588	3.97
	High	[K].ITGLPVGAVK.[Q]	1	1	Q2UXQ3+tags	Q2UXQ3+tags	Q2UXQ3+tags Q2UXQ3+tags	2	477.803	954.598	44.3537	1.75	1.97408e+06
	High	[R].AVSDDMDDYcSGITSDcAR.[N]	1	1	Q2UXQ3+tags	Q2UXQ3+tags	Q2UXQ3+tags Q2UXQ3+tags	2	1069.41	2137.82	32.7174	2.23
	High	[K].ITGLPVGAVK.[Q]	1	1	Q2UXQ3+tags	Q2UXQ3+tags	Q2UXQ3+tags Q2UXQ3+tags	2	477.803	954.598	32.2204	1.47	3.43783e+06
	High	[K].VPDSESHAVYK.[Y]	1	1	Q2UXQ3+tags	Q2UXQ3+tags	Q2UXQ3+tags Q2UXQ3+tags	3	411.203	1231.6	32.2835	2.65	41585.8
	High	[R].IQNDADSTASISAcNGLK.[G]	1	1	Q2UXQ3+tags	Q2UXQ3+tags	Q2UXQ3+tags Q2UXQ3+tags	2	932.94	1864.87	32.3045	3.32	1.25946e+06
	High	[R].YIQLVIVADHAmVTK.[N]	1	1	Q2UXQ3+tags	Q2UXQ3+tags	Q2UXQ3+tags Q2UXQ3+tags	3	572.984	1716.94	32.3225	2.12
	High	[R].GETYLIEPLKVPDSESHAVYK.[Y]	1	1	Q2UXQ3+tags	Q2UXQ3+tags	Q2UXQ3+tags Q2UXQ3+tags	3	792.41	2375.22	32.3699	4.32
	High	[R].AQDSYHFSDcSK.[N]	1	1	Q2UXQ3+tags	Q2UXQ3+tags	Q2UXQ3+tags Q2UXQ3+tags	3	482.198	1444.58	32.3714	2.53	1.4037e+06
	High	[R].AVSDDmDDYcSGITSDcAR.[N]	1	1	Q2UXQ3+tags	Q2UXQ3+tags	Q2UXQ3+tags Q2UXQ3+tags	2	1077.41	2153.81	32.3743	3.4	1.21469e+06
	High	[K].ITGLPVGAVK.[Q]	1	1	Q2UXQ3+tags	Q2UXQ3+tags	Q2UXQ3+tags Q2UXQ3+tags	2	477.803	954.598	44.8594	1.43	292024
	High	[R].GETYLIEPLKVPDSESHAVYK.[Y]	1	1	Q2UXQ3+tags	Q2UXQ3+tags	Q2UXQ3+tags Q2UXQ3+tags	3	792.41	2375.21	44.8422	3.41	4.17546e+06
	High	[R].AQDSYHFSDcSK.[N]	1	1	Q2UXQ3+tags	Q2UXQ3+tags	Q2UXQ3+tags Q2UXQ3+tags	3	482.198	1444.58	44.824	2.19	89410.4
	High	[R].WNDLQGGSGLNDIFEAQK.[I]	1	1	Q2UXQ3+tags	Q2UXQ3+tags	Q2UXQ3+tags Q2UXQ3+tags	2	996.478	1991.95	44.808	2.5	189255
	High	[R].GETYLIEPLKVPDSESHAVYK.[Y]	1	1	Q2UXQ3+tags	Q2UXQ3+tags	Q2UXQ3+tags Q2UXQ3+tags	2	1188.11	2375.22	32.4677	3.92
	High	[K].SGNVNDYEVVNPQK.[I]	1	1	Q2UXQ3+tags	Q2UXQ3+tags	Q2UXQ3+tags Q2UXQ3+tags	2	781.878	1562.75	32.5026	3.12	3.71539e+06
	High	[K].ASHLVATSEQQHFDPR.[Y]	1	1	Q2UXQ3+tags	Q2UXQ3+tags	Q2UXQ3+tags Q2UXQ3+tags	2	911.947	1822.89	44.5346	3.45	1.06467e+06
	High	[R].GETYLIEPLK.[V]	1	1	Q2UXQ3+tags	Q2UXQ3+tags	Q2UXQ3+tags Q2UXQ3+tags	2	581.822	1162.64	32.5469	2.18
	High	[R].IQNDADSTASISAcNGLK.[G]	1	1	Q2UXQ3+tags	Q2UXQ3+tags	Q2UXQ3+tags Q2UXQ3+tags	2	932.941	1864.88	44.5045	2.53	87667
	High	[R].EILNSFGEWR.[Q]	1	1	Q2UXQ3+tags	Q2UXQ3+tags	Q2UXQ3+tags Q2UXQ3+tags	2	625.812	1250.62	44.4276	2.31	4.67969e+06
	High	[R].ITHDNAQLLTAVNLNGDTIGR.[A]	1	1	Q2UXQ3+tags	Q2UXQ3+tags	Q2UXQ3+tags Q2UXQ3+tags	3	746.061	2236.17	32.6823	2.98	6.12909e+06
	High	[K].ITGLPVGAVK.[Q]	1	1	Q2UXQ3+tags	Q2UXQ3+tags	Q2UXQ3+tags Q2UXQ3+tags	2	477.803	954.598	32.7247	1.89	5.67549e+06
	High	[R].IQNDADSTASISAcNGLK.[G]	1	1	Q2UXQ3+tags	Q2UXQ3+tags	Q2UXQ3+tags Q2UXQ3+tags	2	932.94	1864.87	30.6271	4.55	1.41303e+06
	High	[R].GETYLIEPLKVPDSESHAVYK.[Y]	1	1	Q2UXQ3+tags	Q2UXQ3+tags	Q2UXQ3+tags Q2UXQ3+tags	3	792.41	2375.21	47.3688	2.95	258565
	High	[R].IQNDADSTASISAcNGLK.[G]	1	1	Q2UXQ3+tags	Q2UXQ3+tags	Q2UXQ3+tags Q2UXQ3+tags	2	932.94	1864.87	39.788	4.81	485879
	High	[R].IQNDADSTASISAcNGLK.[G]	1	1	Q2UXQ3+tags	Q2UXQ3+tags	Q2UXQ3+tags Q2UXQ3+tags	2	932.939	1864.87	47.0576	2.36	129292
	High	[K].mcGVTLTNWESDKPIKK.[A]	1	1	Q2UXQ3+tags	Q2UXQ3+tags	Q2UXQ3+tags Q2UXQ3+tags	3	675.005	2023	28.7682	3.61	8.66552e+06
	High	[K].SGNVNDYEVVNPQK.[I]	1	1	Q2UXQ3+tags	Q2UXQ3+tags	Q2UXQ3+tags Q2UXQ3+tags	2	781.876	1562.75	47.0508	3.01	111522
	High	[R].EILNSFGEWR.[Q]	1	1	Q2UXQ3+tags	Q2UXQ3+tags	Q2UXQ3+tags Q2UXQ3+tags	2	625.812	1250.62	46.9555	2.07	485602
	High	[R].AVSDDmDDYcSGITSDcAR.[N]	1	1	Q2UXQ3+tags	Q2UXQ3+tags	Q2UXQ3+tags Q2UXQ3+tags	2	1077.41	2153.81	28.9974	3.36	1.91784e+06
	High	[K].ASHLVATSEQQHFDPR.[Y]	1	1	Q2UXQ3+tags	Q2UXQ3+tags	Q2UXQ3+tags Q2UXQ3+tags	3	608.299	1822.88	29.0065	3.39
	High	[R].AQDSYHFSDcSK.[N]	1	1	Q2UXQ3+tags	Q2UXQ3+tags	Q2UXQ3+tags Q2UXQ3+tags	3	482.198	1444.58	29.0356	1.67	2.43601e+06
	High	[R].AVSDDmDDYcSGITSDcAR.[N]	1	1	Q2UXQ3+tags	Q2UXQ3+tags	Q2UXQ3+tags Q2UXQ3+tags	2	1077.41	2153.8	46.9399	2.33	148623
	High	[K].ITGLPVGAVK.[Q]	1	1	Q2UXQ3+tags	Q2UXQ3+tags	Q2UXQ3+tags Q2UXQ3+tags	2	477.803	954.598	29.0625	1.38	6.80058e+06
	High	[R].IQNDADSTASISAcNGLK.[G]	1	1	Q2UXQ3+tags	Q2UXQ3+tags	Q2UXQ3+tags Q2UXQ3+tags	3	622.296	1864.87	29.0953	2.78	652707
	High	[R].IQNDADSTASISAcNGLK.[G]	1	1	Q2UXQ3+tags	Q2UXQ3+tags	Q2UXQ3+tags Q2UXQ3+tags	2	932.94	1864.87	29.1044	4.38	2.39028e+06
	High	[K].mcGVTLTNWESDKPIK.[K]	1	1	Q2UXQ3+tags	Q2UXQ3+tags	Q2UXQ3+tags Q2UXQ3+tags	3	632.306	1894.9	29.1356	2.58
	High	[K].mcGVTLTNWESDKPIK.[K]	1	1	Q2UXQ3+tags	Q2UXQ3+tags	Q2UXQ3+tags Q2UXQ3+tags	2	947.956	1894.91	29.1358	3.92	2.64415e+06
	High	[R].AVSDDMDDYcSGITSDcAR.[N]	1	1	Q2UXQ3+tags	Q2UXQ3+tags	Q2UXQ3+tags Q2UXQ3+tags	2	1069.41	2137.81	29.2195	3.95
	High	[R].GETYLIEPLKVPDSESHAVYK.[Y]	1	1	Q2UXQ3+tags	Q2UXQ3+tags	Q2UXQ3+tags Q2UXQ3+tags	3	792.41	2375.21	46.8604	3.54
	High	[R].IQNDADSTASISAcNGLK.[G]	1	1	Q2UXQ3+tags	Q2UXQ3+tags	Q2UXQ3+tags Q2UXQ3+tags	2	932.94	1864.87	28.5973	4.11	2.28464e+06
	High	[R].YIQLVIVADHAmVTK.[N]	1	1	Q2UXQ3+tags	Q2UXQ3+tags	Q2UXQ3+tags Q2UXQ3+tags	2	858.974	1716.94	46.8549	1.99	95008.5
	High	[K].mcGVTLTNWESDKPIK.[K]	1	1	Q2UXQ3+tags	Q2UXQ3+tags	Q2UXQ3+tags Q2UXQ3+tags	2	947.957	1894.91	28.5801	3.94	9.05508e+08
	High	[K].mcGVTLTNWESDKPIK.[K]	1	1	Q2UXQ3+tags	Q2UXQ3+tags	Q2UXQ3+tags Q2UXQ3+tags	3	632.306	1894.9	28.5668	2.8	7.41216e+09
	High	[R].AVSDDmDDYcSGITSDcAR.[N]	1	1	Q2UXQ3+tags	Q2UXQ3+tags	Q2UXQ3+tags Q2UXQ3+tags	3	718.606	2153.8	27.9249	2.83
	High	[R].AQDSYHFSDcSK.[N]	1	1	Q2UXQ3+tags	Q2UXQ3+tags	Q2UXQ3+tags Q2UXQ3+tags	3	482.198	1444.58	27.9325	3.01	754655
	High	[R].EILNSFGEWR.[Q]	1	1	Q2UXQ3+tags	Q2UXQ3+tags	Q2UXQ3+tags Q2UXQ3+tags	2	625.812	1250.62	47.9701	2.54
	High	[K].ASHLVATSEQQHFDPR.[Y]	1	1	Q2UXQ3+tags	Q2UXQ3+tags	Q2UXQ3+tags Q2UXQ3+tags	3	608.3	1822.88	27.993	3.47	2.745e+06
	High	[R].AQDSYHFSDcSK.[N]	1	1	Q2UXQ3+tags	Q2UXQ3+tags	Q2UXQ3+tags Q2UXQ3+tags	3	482.198	1444.58	47.9516	2.7	202172
	High	[R].IQNDADSTASISAcNGLK.[G]	1	1	Q2UXQ3+tags	Q2UXQ3+tags	Q2UXQ3+tags Q2UXQ3+tags	3	622.293	1864.86	28.0639	3.49	557393
	High	[R].IQNDADSTASISAcNGLK.[G]	1	1	Q2UXQ3+tags	Q2UXQ3+tags	Q2UXQ3+tags Q2UXQ3+tags	2	932.939	1864.87	28.0877	4.49	1.08717e+06
	High	[R].GETYLIEPLKVPDSESHAVYK.[Y]	1	1	Q2UXQ3+tags	Q2UXQ3+tags	Q2UXQ3+tags Q2UXQ3+tags	4	594.559	2375.21	47.7274	2.25	482731
	High	[K].mcGVTLTNWESDKPIKK.[A]	1	1	Q2UXQ3+tags	Q2UXQ3+tags	Q2UXQ3+tags Q2UXQ3+tags	4	506.505	2023	47.6422	1.52
	High	[R].ITHDNAQLLTAVNLNGDTIGR.[A]	1	1	Q2UXQ3+tags	Q2UXQ3+tags	Q2UXQ3+tags Q2UXQ3+tags	3	746.062	2236.17	47.6108	3.66	133275
	High	[R].IQNDADSTASISAcNGLK.[G]	1	1	Q2UXQ3+tags	Q2UXQ3+tags	Q2UXQ3+tags Q2UXQ3+tags	2	932.94	1864.87	47.5615	2.13	101875
	High	[K].SGNVNDYEVVNPQK.[I]	1	1	Q2UXQ3+tags	Q2UXQ3+tags	Q2UXQ3+tags Q2UXQ3+tags	2	781.876	1562.75	28.2404	3.63	954811
	High	[R].AVSDDmDDYcSGITSDcAR.[N]	1	1	Q2UXQ3+tags	Q2UXQ3+tags	Q2UXQ3+tags Q2UXQ3+tags	2	1077.4	2153.8	28.2793	3.66	177166
	High	[R].AVSDDmDDYcSGITSDcAR.[N]	1	1	Q2UXQ3+tags	Q2UXQ3+tags	Q2UXQ3+tags Q2UXQ3+tags	2	1077.41	2153.8	47.4556	2.11	177835
	High	[K].VPDSESHAVYK.[Y]	1	1	Q2UXQ3+tags	Q2UXQ3+tags	Q2UXQ3+tags Q2UXQ3+tags	3	411.203	1231.6	28.448	2.43	810791
	High	[R].AQDSYHFSDcSK.[N]	1	1	Q2UXQ3+tags	Q2UXQ3+tags	Q2UXQ3+tags Q2UXQ3+tags	3	482.198	1444.58	28.4649	2.91	4.02047e+06
	High	[R].AVSDDMDDYcSGITSDcAR.[N]	1	1	Q2UXQ3+tags	Q2UXQ3+tags	Q2UXQ3+tags Q2UXQ3+tags	2	1069.41	2137.82	28.5138	3.65
	High	[R].IQNDADSTASISAcNGLK.[G]	1	1	Q2UXQ3+tags	Q2UXQ3+tags	Q2UXQ3+tags Q2UXQ3+tags	3	622.295	1864.87	28.5737	3.39	1.72469e+06
	High	[R].YIQLVIVADHAMVTK.[N]	1	1	Q2UXQ3+tags	Q2UXQ3+tags	Q2UXQ3+tags Q2UXQ3+tags	3	567.652	1700.94	33.3771	2.05	6.85063e+06
	High	[R].IQNDADSTASISAcNGLK.[G]	1	1	Q2UXQ3+tags	Q2UXQ3+tags	Q2UXQ3+tags Q2UXQ3+tags	2	932.939	1864.87	46.733	3.84
	High	[R].AVSDDmDDYcSGITSDcAR.[N]	1	1	Q2UXQ3+tags	Q2UXQ3+tags	Q2UXQ3+tags Q2UXQ3+tags	2	1077.41	2153.8	29.9434	2.98
	High	[K].VPDSESHAVYK.[Y]	1	1	Q2UXQ3+tags	Q2UXQ3+tags	Q2UXQ3+tags Q2UXQ3+tags	3	411.204	1231.6	30.0395	2.7
	High	[K].ITGLPVGAVK.[Q]	1	1	Q2UXQ3+tags	Q2UXQ3+tags	Q2UXQ3+tags Q2UXQ3+tags	2	477.803	954.598	30.0738	1.25	4.2092e+06
	High	[R].AQDSYHFSDcSK.[N]	1	1	Q2UXQ3+tags	Q2UXQ3+tags	Q2UXQ3+tags Q2UXQ3+tags	3	482.198	1444.58	45.9378	2.21	334553
	High	[K].ITGLPVGAVK.[Q]	1	1	Q2UXQ3+tags	Q2UXQ3+tags	Q2UXQ3+tags Q2UXQ3+tags	2	477.803	954.598	45.9278	1.67	6.25582e+06
	High	[R].IQNDADSTASISAcNGLK.[G]	1	1	Q2UXQ3+tags	Q2UXQ3+tags	Q2UXQ3+tags Q2UXQ3+tags	2	932.938	1864.87	30.1177	3.12	698852
	High	[K].mcGVTLTNWESDKPIK.[K]	1	1	Q2UXQ3+tags	Q2UXQ3+tags	Q2UXQ3+tags Q2UXQ3+tags	3	632.307	1894.91	30.1516	2.94
	High	[K].mcGVTLTNWESDKPIK.[K]	1	1	Q2UXQ3+tags	Q2UXQ3+tags	Q2UXQ3+tags Q2UXQ3+tags	2	947.954	1894.9	30.179	2.88
	High	[R].WNDLQGGSGLNDIFEAQK.[I]	1	1	Q2UXQ3+tags	Q2UXQ3+tags	Q2UXQ3+tags Q2UXQ3+tags	2	996.478	1991.95	45.8163	3.15	1.83146e+06
	High	[R].AVSDDMDDYcSGITSDcAR.[N]	1	1	Q2UXQ3+tags	Q2UXQ3+tags	Q2UXQ3+tags Q2UXQ3+tags	2	1069.41	2137.81	30.3046	3.64
	High	[R].AVSDDmDDYcSGITSDcAR.[N]	1	1	Q2UXQ3+tags	Q2UXQ3+tags	Q2UXQ3+tags Q2UXQ3+tags	2	1077.41	2153.81	30.341	3.19	3.54557e+06
	High	[K].SGNVNDYEVVNPQK.[I]	1	1	Q2UXQ3+tags	Q2UXQ3+tags	Q2UXQ3+tags Q2UXQ3+tags	2	781.876	1562.74	30.3778	4.19
	High	[R].AVSDDMDDYcSGITSDcAR.[N]	1	1	Q2UXQ3+tags	Q2UXQ3+tags	Q2UXQ3+tags Q2UXQ3+tags	3	713.274	2137.81	30.3809	1.6
	High	[K].mcGVTLTNWESDKPIKK.[A]	1	1	Q2UXQ3+tags	Q2UXQ3+tags	Q2UXQ3+tags Q2UXQ3+tags	3	675.008	2023.01	30.3882	3.43	1.51609e+06
	High	[R].AVSDDmDDYcSGITSDcAR.[N]	1	1	Q2UXQ3+tags	Q2UXQ3+tags	Q2UXQ3+tags Q2UXQ3+tags	2	1077.41	2153.81	45.7881	3.22	509712
	High	[K].McGVTLTNWESDKPIK.[K]	1	1	Q2UXQ3+tags	Q2UXQ3+tags	Q2UXQ3+tags Q2UXQ3+tags	3	626.974	1878.91	30.5564	3.68	7.28182e+08
	High	[K].VPDSESHAVYK.[Y]	1	1	Q2UXQ3+tags	Q2UXQ3+tags	Q2UXQ3+tags Q2UXQ3+tags	3	411.204	1231.6	30.5776	2.47	309113
	High	[K].McGVTLTNWESDKPIK.[K]	1	1	Q2UXQ3+tags	Q2UXQ3+tags	Q2UXQ3+tags Q2UXQ3+tags	2	939.958	1878.91	30.592	3.77	8.16287e+07
	High	[R].WNDLQGGSGLNDIFEAQK.[I]	1	1	Q2UXQ3+tags	Q2UXQ3+tags	Q2UXQ3+tags Q2UXQ3+tags	2	996.478	1991.95	46.8292	2.45	147814
	High	[K].mcGVTLTNWESDKPIKK.[A]	1	1	Q2UXQ3+tags	Q2UXQ3+tags	Q2UXQ3+tags Q2UXQ3+tags	3	675.006	2023	29.8839	2.91	4.09216e+06
	High	[R].WNDLQGGSGLNDIFEAQK.[I]	1	1	Q2UXQ3+tags	Q2UXQ3+tags	Q2UXQ3+tags Q2UXQ3+tags	2	996.477	1991.95	46.6562	3.4	95540.5
	High	[K].SGNVNDYEVVNPQK.[I]	1	1	Q2UXQ3+tags	Q2UXQ3+tags	Q2UXQ3+tags Q2UXQ3+tags	2	781.877	1562.75	46.5455	2.55	180273
	High	[K].ITGLPVGAVK.[Q]	1	1	Q2UXQ3+tags	Q2UXQ3+tags	Q2UXQ3+tags Q2UXQ3+tags	2	477.803	954.598	46.432	1.19	555514
	High	[R].AVSDDmDDYcSGITSDcAR.[N]	1	1	Q2UXQ3+tags	Q2UXQ3+tags	Q2UXQ3+tags Q2UXQ3+tags	2	1077.4	2153.8	29.508	3.76
	High	[R].YIQLVIVADHAmVTK.[N]	1	1	Q2UXQ3+tags	Q2UXQ3+tags	Q2UXQ3+tags Q2UXQ3+tags	3	572.984	1716.94	46.3832	2.85	352476
	High	[R].GETYLIEPLKVPDSESHAVYK.[Y]	1	1	Q2UXQ3+tags	Q2UXQ3+tags	Q2UXQ3+tags Q2UXQ3+tags	3	792.41	2375.22	46.3572	2.46
	High	[R].GETYLIEPLK.[V]	1	1	Q2UXQ3+tags	Q2UXQ3+tags	Q2UXQ3+tags Q2UXQ3+tags	2	581.822	1162.64	46.3503	1.62	396499
	High	[R].GETYLIEPLKVPDSESHAVYK.[Y]	1	1	Q2UXQ3+tags	Q2UXQ3+tags	Q2UXQ3+tags Q2UXQ3+tags	4	594.559	2375.21	46.205	3.43	1.02243e+06
	High	[R].IQNDADSTASISAcNGLK.[G]	1	1	Q2UXQ3+tags	Q2UXQ3+tags	Q2UXQ3+tags Q2UXQ3+tags	2	932.94	1864.87	29.6141	4.1	508045
	High	[K].mcGVTLTNWESDKPIK.[K]	1	1	Q2UXQ3+tags	Q2UXQ3+tags	Q2UXQ3+tags Q2UXQ3+tags	3	632.306	1894.9	29.6381	2.74
	High	[R].WNDLQGGSGLNDIFEAQK.[I]	1	1	Q2UXQ3+tags	Q2UXQ3+tags	Q2UXQ3+tags Q2UXQ3+tags	2	996.477	1991.95	46.1551	3.01	68135.8
	High	[R].ITHDNAQLLTAVNLNGDTIGR.[A]	1	1	Q2UXQ3+tags	Q2UXQ3+tags	Q2UXQ3+tags Q2UXQ3+tags	3	746.061	2236.17	46.0783	3.49	390923
	High	[K].SGNVNDYEVVNPQK.[I]	1	1	Q2UXQ3+tags	Q2UXQ3+tags	Q2UXQ3+tags Q2UXQ3+tags	2	781.877	1562.75	46.0386	3.38	3.76502e+06
	High	[R].IQNDADSTASISAcNGLK.[G]	1	1	Q2UXQ3+tags	Q2UXQ3+tags	Q2UXQ3+tags Q2UXQ3+tags	2	932.938	1864.87	46.022	4.33	787204
	High	[R].AVSDDMDDYcSGITSDcAR.[N]	1	1	Q2UXQ3+tags	Q2UXQ3+tags	Q2UXQ3+tags Q2UXQ3+tags	2	1069.41	2137.81	29.7976	4.22	1.00401e+09
	High	[K].SGNVNDYEVVNPQK.[I]	1	1	Q2UXQ3+tags	Q2UXQ3+tags	Q2UXQ3+tags Q2UXQ3+tags	2	781.877	1562.75	29.8671	3.93	445947
	High	[R].AVSDDMDDYcSGITSDcAR.[N]	1	1	Q2UXQ3+tags	Q2UXQ3+tags	Q2UXQ3+tags Q2UXQ3+tags	3	713.275	2137.81	29.8763	2.53	2.07408e+08
	High	[R].TDTVSTPVSENELLQFLR.[A]	1	1	Q2UXQ3+tags	Q2UXQ3+tags	Q2UXQ3+tags Q2UXQ3+tags	2	1025.03	2049.05	45.9388	2.45
	High	[K].mcGVTLTNWESDKPIKK.[A]	1	1	Q2UXQ3+tags	Q2UXQ3+tags	Q2UXQ3+tags Q2UXQ3+tags	3	675.005	2023	27.9227	3.55	1.08326e+06
	High	[R].GETYLIEPLKVPDSESHAVYK.[Y]	1	1	Q2UXQ3+tags	Q2UXQ3+tags	Q2UXQ3+tags Q2UXQ3+tags	3	792.41	2375.21	33.4145	3.55	2.02632e+06
	High	[K].ITGLPVGAVK.[Q]	1	1	Q2UXQ3+tags	Q2UXQ3+tags	Q2UXQ3+tags Q2UXQ3+tags	2	477.803	954.598	37.7901	1.84	905319
	High	[K].SGNVNDYEVVNPQK.[I]	1	1	Q2UXQ3+tags	Q2UXQ3+tags	Q2UXQ3+tags Q2UXQ3+tags	2	781.876	1562.74	37.8317	3.06
	High	[R].IQNDADSTASISAcNGLK.[G]	1	1	Q2UXQ3+tags	Q2UXQ3+tags	Q2UXQ3+tags Q2UXQ3+tags	3	622.296	1864.87	37.9445	3.04	373690
	High	[R].GETYLIEPLK.[V]	1	1	Q2UXQ3+tags	Q2UXQ3+tags	Q2UXQ3+tags Q2UXQ3+tags	2	581.821	1162.64	41.1071	2.13	124295
	High	[R].YIQLVIVADHAmVTK.[N]	1	1	Q2UXQ3+tags	Q2UXQ3+tags	Q2UXQ3+tags Q2UXQ3+tags	2	858.971	1716.94	40.9774	1.72	64073
	High	[R].ITHDNAQLLTAVNLNGDTIGR.[A]	1	1	Q2UXQ3+tags	Q2UXQ3+tags	Q2UXQ3+tags Q2UXQ3+tags	3	746.062	2236.17	37.9904	2.95	354912
	High	[R].WNDLQGGSGLNDIFEAQK.[I]	1	1	Q2UXQ3+tags	Q2UXQ3+tags	Q2UXQ3+tags Q2UXQ3+tags	2	996.477	1991.95	41.2259	3.54	1.25991e+07
	High	[K].SGNVNDYEVVNPQK.[I]	1	1	Q2UXQ3+tags	Q2UXQ3+tags	Q2UXQ3+tags Q2UXQ3+tags	2	781.876	1562.75	40.8867	3.34	154966
	High	[K].ITGLPVGAVK.[Q]	1	1	Q2UXQ3+tags	Q2UXQ3+tags	Q2UXQ3+tags Q2UXQ3+tags	2	477.803	954.598	40.8145	1.54	893745
	High	[K].VPDSESHAVYK.[Y]	1	1	Q2UXQ3+tags	Q2UXQ3+tags	Q2UXQ3+tags Q2UXQ3+tags	3	411.204	1231.6	38.0812	1.66	431481
	High	[R].GETYLIEPLKVPDSESHAVYK.[Y]	1	1	Q2UXQ3+tags	Q2UXQ3+tags	Q2UXQ3+tags Q2UXQ3+tags	4	594.559	2375.21	38.0876	3.74	719158
	High	[R].YIQLVIVADHAmVTK.[N]	1	1	Q2UXQ3+tags	Q2UXQ3+tags	Q2UXQ3+tags Q2UXQ3+tags	3	572.984	1716.94	38.089	2.54
	High	[R].EILNSFGEWR.[Q]	1	1	Q2UXQ3+tags	Q2UXQ3+tags	Q2UXQ3+tags Q2UXQ3+tags	2	625.812	1250.62	38.1965	2.51
	High	[R].IQNDADSTASISAcNGLK.[G]	1	1	Q2UXQ3+tags	Q2UXQ3+tags	Q2UXQ3+tags Q2UXQ3+tags	2	932.941	1864.87	40.8068	4.54
	High	[R].IQNDADSTASISAcNGLK.[G]	1	1	Q2UXQ3+tags	Q2UXQ3+tags	Q2UXQ3+tags Q2UXQ3+tags	2	932.939	1864.87	38.215	4.01	349515
	High	[R].GETYLIEPLKVPDSESHAVYK.[Y]	1	1	Q2UXQ3+tags	Q2UXQ3+tags	Q2UXQ3+tags Q2UXQ3+tags	3	792.41	2375.22	40.7888	4.03
	High	[R].EILNSFGEWR.[Q]	1	1	Q2UXQ3+tags	Q2UXQ3+tags	Q2UXQ3+tags Q2UXQ3+tags	2	625.812	1250.62	40.8865	2.51	950398
	High	[R].IQNDADSTASISAcNGLK.[G]	1	1	Q2UXQ3+tags	Q2UXQ3+tags	Q2UXQ3+tags Q2UXQ3+tags	2	932.94	1864.87	37.7053	4.23	880546
	High	[R].GETYLIEPLKVPDSESHAVYK.[Y]	1	1	Q2UXQ3+tags	Q2UXQ3+tags	Q2UXQ3+tags Q2UXQ3+tags	3	792.41	2375.22	37.7021	2.77	1.90452e+06
	High	[R].WNDLQGGSGLNDIFEAQK.[I]	1	1	Q2UXQ3+tags	Q2UXQ3+tags	Q2UXQ3+tags Q2UXQ3+tags	3	664.654	1991.95	41.2263	3.85	7.72985e+06
	High	[R].GETYLIEPLKVPDSESHAVYK.[Y]	1	1	Q2UXQ3+tags	Q2UXQ3+tags	Q2UXQ3+tags Q2UXQ3+tags	3	792.41	2375.22	36.6867	3.52	1.57022e+06
	High	[R].EILNSFGEWR.[Q]	1	1	Q2UXQ3+tags	Q2UXQ3+tags	Q2UXQ3+tags Q2UXQ3+tags	2	625.812	1250.62	41.3898	2.67	7.07633e+06
	High	[R].AQDSYHFSDcSK.[N]	1	1	Q2UXQ3+tags	Q2UXQ3+tags	Q2UXQ3+tags Q2UXQ3+tags	3	482.198	1444.58	36.7475	2.6	698854
	High	[K].ITGLPVGAVK.[Q]	1	1	Q2UXQ3+tags	Q2UXQ3+tags	Q2UXQ3+tags Q2UXQ3+tags	2	477.803	954.598	36.7776	1.63	619367
	High	[K].ASHLVATSEQQHFDPR.[Y]	1	1	Q2UXQ3+tags	Q2UXQ3+tags	Q2UXQ3+tags Q2UXQ3+tags	3	608.3	1822.88	36.7849	2.91	408444
	High	[K].ASHLVATSEQQHFDPR.[Y]	1	1	Q2UXQ3+tags	Q2UXQ3+tags	Q2UXQ3+tags Q2UXQ3+tags	4	456.476	1822.88	41.3346	2.98	1.12775e+06
	High	[K].ITGLPVGAVK.[Q]	1	1	Q2UXQ3+tags	Q2UXQ3+tags	Q2UXQ3+tags Q2UXQ3+tags	2	477.803	954.598	41.3251	1.94	1.47476e+06
	High	[R].IQNDADSTASISAcNGLK.[G]	1	1	Q2UXQ3+tags	Q2UXQ3+tags	Q2UXQ3+tags Q2UXQ3+tags	2	932.94	1864.87	41.32	4.14	379617
	High	[R].GETYLIEPLKVPDSESHAVYK.[Y]	1	1	Q2UXQ3+tags	Q2UXQ3+tags	Q2UXQ3+tags Q2UXQ3+tags	4	594.559	2375.21	37.0684	2.95	968153
	High	[R].IQNDADSTASISAcNGLK.[G]	1	1	Q2UXQ3+tags	Q2UXQ3+tags	Q2UXQ3+tags Q2UXQ3+tags	2	932.941	1864.87	37.1203	3.24	163789
	High	[R].GETYLIEPLKVPDSESHAVYK.[Y]	1	1	Q2UXQ3+tags	Q2UXQ3+tags	Q2UXQ3+tags Q2UXQ3+tags	3	792.411	2375.22	37.1927	5.02
	High	[K].ITGLPVGAVK.[Q]	1	1	Q2UXQ3+tags	Q2UXQ3+tags	Q2UXQ3+tags Q2UXQ3+tags	2	477.803	954.598	37.2842	1.55	1.06837e+06
	High	[R].GETYLIEPLKVPDSESHAVYK.[Y]	1	1	Q2UXQ3+tags	Q2UXQ3+tags	Q2UXQ3+tags Q2UXQ3+tags	3	792.41	2375.21	41.2987	3.38	1.01722e+06
	High	[R].ITHDNAQLLTAVNLNGDTIGR.[A]	1	1	Q2UXQ3+tags	Q2UXQ3+tags	Q2UXQ3+tags Q2UXQ3+tags	3	746.061	2236.17	37.3666	2.76
	High	[R].ITHDNAQLLTAVNLNGDTIGR.[A]	1	1	Q2UXQ3+tags	Q2UXQ3+tags	Q2UXQ3+tags Q2UXQ3+tags	3	746.061	2236.17	41.2297	3.41	158273
	High	[R].YIQLVIVADHAmVTK.[N]	1	1	Q2UXQ3+tags	Q2UXQ3+tags	Q2UXQ3+tags Q2UXQ3+tags	3	572.984	1716.94	37.5607	2.5	294849
	High	[R].AQDSYHFSDcSK.[N]	1	1	Q2UXQ3+tags	Q2UXQ3+tags	Q2UXQ3+tags Q2UXQ3+tags	3	482.198	1444.58	41.2278	2.13	428784
	High	[R].AVSDDmDDYcSGITSDcAR.[N]	1	1	Q2UXQ3+tags	Q2UXQ3+tags	Q2UXQ3+tags Q2UXQ3+tags	2	1077.41	2153.81	37.5655	2.76	296767
	High	[K].ASHLVATSEQQHFDPR.[Y]	1	1	Q2UXQ3+tags	Q2UXQ3+tags	Q2UXQ3+tags Q2UXQ3+tags	4	456.476	1822.88	37.5711	2.6	2.39693e+06
	High	[R].GETYLIEPLKVPDSESHAVYK.[Y]	1	1	Q2UXQ3+tags	Q2UXQ3+tags	Q2UXQ3+tags Q2UXQ3+tags	4	594.559	2375.21	37.5788	2.54	490158
	High	[K].SGNVNDYEVVNPQK.[I]	1	1	Q2UXQ3+tags	Q2UXQ3+tags	Q2UXQ3+tags Q2UXQ3+tags	2	781.877	1562.75	38.3469	2.59	373878
	High	[R].AQDSYHFSDcSK.[N]	1	1	Q2UXQ3+tags	Q2UXQ3+tags	Q2UXQ3+tags Q2UXQ3+tags	3	482.198	1444.58	40.7236	2.87	484236
	High	[R].WNDLQGGSGLNDIFEAQK.[I]	1	1	Q2UXQ3+tags	Q2UXQ3+tags	Q2UXQ3+tags Q2UXQ3+tags	3	664.654	1991.95	40.7229	3.74	185179
	High	[R].WNDLQGGSGLNDIFEAQK.[I]	1	1	Q2UXQ3+tags	Q2UXQ3+tags	Q2UXQ3+tags Q2UXQ3+tags	2	996.479	1991.95	40.7224	4.44
	High	[R].IQNDADSTASISAcNGLK.[G]	1	1	Q2UXQ3+tags	Q2UXQ3+tags	Q2UXQ3+tags Q2UXQ3+tags	2	932.941	1864.88	39.2686	4.21	185056
	High	[R].WNDLQGGSGLNDIFEAQK.[I]	1	1	Q2UXQ3+tags	Q2UXQ3+tags	Q2UXQ3+tags Q2UXQ3+tags	2	996.477	1991.95	39.3439	3.08	4286301440
	High	[K].SGNVNDYEVVNPQK.[I]	1	1	Q2UXQ3+tags	Q2UXQ3+tags	Q2UXQ3+tags Q2UXQ3+tags	2	781.877	1562.75	39.3602	2.78	1.3248e+06
	High	[R].EILNSFGEWR.[Q]	1	1	Q2UXQ3+tags	Q2UXQ3+tags	Q2UXQ3+tags Q2UXQ3+tags	2	625.812	1250.62	39.367	2.46	1.42438e+07
	High	[R].WNDLQGGSGLNDIFEAQK.[I]	1	1	Q2UXQ3+tags	Q2UXQ3+tags	Q2UXQ3+tags Q2UXQ3+tags	2	996.477	1991.95	39.394	3.61
	High	[R].YIQLVIVADHAmVTK.[N]	1	1	Q2UXQ3+tags	Q2UXQ3+tags	Q2UXQ3+tags Q2UXQ3+tags	3	572.984	1716.94	40.1143	2.47
	High	[R].WNDLQGGSGLNDIFEAQK.[I]	1	1	Q2UXQ3+tags	Q2UXQ3+tags	Q2UXQ3+tags Q2UXQ3+tags	2	996.477	1991.95	39.9044	3.68
	High	[K].ASHLVATSEQQHFDPR.[Y]	1	1	Q2UXQ3+tags	Q2UXQ3+tags	Q2UXQ3+tags Q2UXQ3+tags	4	456.476	1822.88	39.5985	2.44	741207
	High	[R].GETYLIEPLKVPDSESHAVYK.[Y]	1	1	Q2UXQ3+tags	Q2UXQ3+tags	Q2UXQ3+tags Q2UXQ3+tags	4	594.559	2375.21	39.6075	2.48	2.14901e+06
	High	[R].YIQLVIVADHAmVTK.[N]	1	1	Q2UXQ3+tags	Q2UXQ3+tags	Q2UXQ3+tags Q2UXQ3+tags	3	572.984	1716.94	39.6105	1.97	218440
	High	[R].WNDLQGGSGLNDIFEAQK.[I]	1	1	Q2UXQ3+tags	Q2UXQ3+tags	Q2UXQ3+tags Q2UXQ3+tags	3	664.654	1991.95	39.649	3.21
	High	[R].AQDSYHFSDcSK.[N]	1	1	Q2UXQ3+tags	Q2UXQ3+tags	Q2UXQ3+tags Q2UXQ3+tags	3	482.198	1444.58	39.6664	2.65	332665
	High	[R].ITHDNAQLLTAVNLNGDTIGR.[A]	1	1	Q2UXQ3+tags	Q2UXQ3+tags	Q2UXQ3+tags Q2UXQ3+tags	3	746.063	2236.17	39.675	2.93	415055
	High	[R].EILNSFGEWR.[Q]	1	1	Q2UXQ3+tags	Q2UXQ3+tags	Q2UXQ3+tags Q2UXQ3+tags	2	625.812	1250.62	39.8764	3.01	680214
	High	[K].SGNVNDYEVVNPQK.[I]	1	1	Q2UXQ3+tags	Q2UXQ3+tags	Q2UXQ3+tags Q2UXQ3+tags	2	781.877	1562.75	39.8654	2.83	641831
	High	[R].GETYLIEPLKVPDSESHAVYK.[Y]	1	1	Q2UXQ3+tags	Q2UXQ3+tags	Q2UXQ3+tags Q2UXQ3+tags	3	792.41	2375.22	39.7766	3.71
	High	[R].GETYLIEPLKVPDSESHAVYK.[Y]	1	1	Q2UXQ3+tags	Q2UXQ3+tags	Q2UXQ3+tags Q2UXQ3+tags	3	792.41	2375.21	39.2204	2.33	2.21028e+06
	High	[R].IQNDADSTASISAcNGLK.[G]	1	1	Q2UXQ3+tags	Q2UXQ3+tags	Q2UXQ3+tags Q2UXQ3+tags	2	932.942	1864.88	36.6177	2.77
	High	[R].AQDSYHFSDcSK.[N]	1	1	Q2UXQ3+tags	Q2UXQ3+tags	Q2UXQ3+tags Q2UXQ3+tags	2	722.794	1444.58	40.1579	2.7	704771
	High	[R].GETYLIEPLKVPDSESHAVYK.[Y]	1	1	Q2UXQ3+tags	Q2UXQ3+tags	Q2UXQ3+tags Q2UXQ3+tags	3	792.41	2375.22	40.2866	3.04	3.74589e+06
	High	[R].YIQLVIVADHAmVTK.[N]	1	1	Q2UXQ3+tags	Q2UXQ3+tags	Q2UXQ3+tags Q2UXQ3+tags	3	572.983	1716.94	40.6244	3.31
	High	[R].ITHDNAQLLTAVNLNGDTIGR.[A]	1	1	Q2UXQ3+tags	Q2UXQ3+tags	Q2UXQ3+tags Q2UXQ3+tags	3	746.062	2236.17	38.4961	3.78
	High	[R].AQDSYHFSDcSK.[N]	1	1	Q2UXQ3+tags	Q2UXQ3+tags	Q2UXQ3+tags Q2UXQ3+tags	3	482.198	1444.58	38.5436	2.11	1.15184e+06
	High	[K].ASHLVATSEQQHFDPR.[Y]	1	1	Q2UXQ3+tags	Q2UXQ3+tags	Q2UXQ3+tags Q2UXQ3+tags	4	456.476	1822.88	38.5848	2.99	1.57909e+06
	High	[R].GETYLIEPLKVPDSESHAVYK.[Y]	1	1	Q2UXQ3+tags	Q2UXQ3+tags	Q2UXQ3+tags Q2UXQ3+tags	4	594.559	2375.21	38.5935	2.45	2.9463e+06
	High	[R].YIQLVIVADHAmVTK.[N]	1	1	Q2UXQ3+tags	Q2UXQ3+tags	Q2UXQ3+tags Q2UXQ3+tags	3	572.984	1716.94	38.5952	2.44	422873
	High	[R].GETYLIEPLKVPDSESHAVYK.[Y]	1	1	Q2UXQ3+tags	Q2UXQ3+tags	Q2UXQ3+tags Q2UXQ3+tags	4	594.559	2375.21	40.6234	3.06	4.15095e+06
	High	[R].GETYLIEPLKVPDSESHAVYK.[Y]	1	1	Q2UXQ3+tags	Q2UXQ3+tags	Q2UXQ3+tags Q2UXQ3+tags	3	792.411	2375.22	38.7076	3.83	910168
	High	[R].IQNDADSTASISAcNGLK.[G]	1	1	Q2UXQ3+tags	Q2UXQ3+tags	Q2UXQ3+tags Q2UXQ3+tags	2	932.94	1864.87	38.7611	4	323114
	High	[K].ITGLPVGAVK.[Q]	1	1	Q2UXQ3+tags	Q2UXQ3+tags	Q2UXQ3+tags Q2UXQ3+tags	2	477.803	954.598	38.7968	1.66	1.05373e+06
	High	[R].EILNSFGEWR.[Q]	1	1	Q2UXQ3+tags	Q2UXQ3+tags	Q2UXQ3+tags Q2UXQ3+tags	2	625.813	1250.62	40.3834	2.33	6.58448e+06
	High	[K].SGNVNDYEVVNPQK.[I]	1	1	Q2UXQ3+tags	Q2UXQ3+tags	Q2UXQ3+tags Q2UXQ3+tags	2	781.877	1562.75	38.852	2.98	554133
	High	[R].WNDLQGGSGLNDIFEAQK.[I]	1	1	Q2UXQ3+tags	Q2UXQ3+tags	Q2UXQ3+tags Q2UXQ3+tags	2	996.477	1991.95	38.8892	3.88	4286301440
	High	[K].ASHLVATSEQQHFDPR.[Y]	1	1	Q2UXQ3+tags	Q2UXQ3+tags	Q2UXQ3+tags Q2UXQ3+tags	4	456.476	1822.88	39.0884	2.84	2.08614e+06
	High	[K].ASHLVATSEQQHFDPR.[Y]	1	1	Q2UXQ3+tags	Q2UXQ3+tags	Q2UXQ3+tags Q2UXQ3+tags	4	456.477	1822.89	40.3128	2.29	1.72306e+06
	High	[R].GETYLIEPLKVPDSESHAVYK.[Y]	1	1	Q2UXQ3+tags	Q2UXQ3+tags	Q2UXQ3+tags Q2UXQ3+tags	4	594.559	2375.21	39.0965	2.28	545638
	High	[R].YIQLVIVADHAmVTK.[N]	1	1	Q2UXQ3+tags	Q2UXQ3+tags	Q2UXQ3+tags Q2UXQ3+tags	3	572.984	1716.94	39.1038	2.48
	High	[R].IQNDADSTASISAcNGLK.[G]	1	1	Q2UXQ3+tags	Q2UXQ3+tags	Q2UXQ3+tags Q2UXQ3+tags	2	932.94	1864.87	40.296	3.87	168667
	High	[R].WNDLQGGSGLNDIFEAQK.[I]	1	1	Q2UXQ3+tags	Q2UXQ3+tags	Q2UXQ3+tags Q2UXQ3+tags	3	664.655	1991.95	39.1456	3.08	1.21723e+09
	High	[R].AQDSYHFSDcSK.[N]	1	1	Q2UXQ3+tags	Q2UXQ3+tags	Q2UXQ3+tags Q2UXQ3+tags	3	482.198	1444.58	39.1458	2.07	957186
	High	[R].WNDLQGGSGLNDIFEAQK.[I]	1	1	Q2UXQ3+tags	Q2UXQ3+tags	Q2UXQ3+tags Q2UXQ3+tags	3	664.655	1991.95	40.2191	2.82
	High	[R].GETYLIEPLKVPDSESHAVYK.[Y]	1	1	Q2UXQ3+tags	Q2UXQ3+tags	Q2UXQ3+tags Q2UXQ3+tags	4	594.559	2375.22	36.5617	2.58	2.35792e+06
	High	[K].ASHLVATSEQQHFDPR.[Y]	1	1	Q2UXQ3+tags	Q2UXQ3+tags	Q2UXQ3+tags Q2UXQ3+tags	4	456.476	1822.88	36.5536	2.3	1.38893e+06
	High	[R].ITHDNAQLLTAVNLNGDTIGR.[A]	1	1	Q2UXQ3+tags	Q2UXQ3+tags	Q2UXQ3+tags Q2UXQ3+tags	3	746.062	2236.17	43.0242	2.6	309806
	High	[R].YIQLVIVADHAMVTK.[N]	1	1	Q2UXQ3+tags	Q2UXQ3+tags	Q2UXQ3+tags Q2UXQ3+tags	3	567.652	1700.94	34.5005	3.05	3.6923e+08
	High	[R].YIQLVIVADHAmVTK.[N]	1	1	Q2UXQ3+tags	Q2UXQ3+tags	Q2UXQ3+tags Q2UXQ3+tags	3	572.983	1716.94	34.5014	2.78	406064
	High	[R].YIQLVIVADHAMVTK.[N]	1	1	Q2UXQ3+tags	Q2UXQ3+tags	Q2UXQ3+tags Q2UXQ3+tags	2	850.974	1700.94	34.5177	3.55	1.53601e+08
	High	[R].IQNDADSTASISAcNGLK.[G]	1	1	Q2UXQ3+tags	Q2UXQ3+tags	Q2UXQ3+tags Q2UXQ3+tags	2	932.94	1864.87	42.9737	3.59	246627
	High	[K].ITGLPVGAVK.[Q]	1	1	Q2UXQ3+tags	Q2UXQ3+tags	Q2UXQ3+tags Q2UXQ3+tags	2	477.803	954.598	34.7466	1.95	1020525
	High	[K].ITGLPVGAVK.[Q]	1	1	Q2UXQ3+tags	Q2UXQ3+tags	Q2UXQ3+tags Q2UXQ3+tags	2	477.803	954.598	42.8404	1.67	711245
	High	[R].WNDLQGGSGLNDIFEAQK.[I]	1	1	Q2UXQ3+tags	Q2UXQ3+tags	Q2UXQ3+tags Q2UXQ3+tags	2	996.477	1991.95	42.7599	3.38	679612
	High	[R].AVSDDmDDYcSGITSDcAR.[N]	1	1	Q2UXQ3+tags	Q2UXQ3+tags	Q2UXQ3+tags Q2UXQ3+tags	2	1077.41	2153.81	34.7856	2.91
	High	[R].GETYLIEPLKVPDSESHAVYK.[Y]	1	1	Q2UXQ3+tags	Q2UXQ3+tags	Q2UXQ3+tags Q2UXQ3+tags	4	594.559	2375.21	42.6437	2.54	3.8393e+06
	High	[R].ITHDNAQLLTAVNLNGDTIGR.[A]	1	1	Q2UXQ3+tags	Q2UXQ3+tags	Q2UXQ3+tags Q2UXQ3+tags	3	746.06	2236.17	42.4959	3.49	130886
	High	[R].IQNDADSTASISAcNGLK.[G]	1	1	Q2UXQ3+tags	Q2UXQ3+tags	Q2UXQ3+tags Q2UXQ3+tags	2	932.939	1864.87	34.9258	4.22	700187
	High	[R].IQNDADSTASISAcNGLK.[G]	1	1	Q2UXQ3+tags	Q2UXQ3+tags	Q2UXQ3+tags Q2UXQ3+tags	2	932.938	1864.87	42.4645	3.7	153359
	High	[R].AQDSYHFSDcSK.[N]	1	1	Q2UXQ3+tags	Q2UXQ3+tags	Q2UXQ3+tags Q2UXQ3+tags	3	482.199	1444.58	34.9917	2.34	1.03489e+06
	High	[K].VPDSESHAVYK.[Y]	1	1	Q2UXQ3+tags	Q2UXQ3+tags	Q2UXQ3+tags Q2UXQ3+tags	3	411.203	1231.6	42.4277	2.13	234034
	High	[K].SGNVNDYEVVNPQKITGLPVGAVK.[Q]	1	1	Q2UXQ3+tags	Q2UXQ3+tags	Q2UXQ3+tags Q2UXQ3+tags	3	833.447	2498.33	34.3345	2.96	7.74244e+07
	High	[R].YIQLVIVADHAMVTK.[N]	1	1	Q2UXQ3+tags	Q2UXQ3+tags	Q2UXQ3+tags Q2UXQ3+tags	3	567.653	1700.94	35.0116	2.86	1.30487e+06
	High	[R].AVSDDmDDYcSGITSDcAR.[N]	1	1	Q2UXQ3+tags	Q2UXQ3+tags	Q2UXQ3+tags Q2UXQ3+tags	2	1077.41	2153.81	34.2672	2.65	316070
	High	[R].AQDSYHFSDcSK.[N]	1	1	Q2UXQ3+tags	Q2UXQ3+tags	Q2UXQ3+tags Q2UXQ3+tags	3	482.198	1444.58	34.1978	2.29	199798
	High	[R].YIQLVIVADHAmVTK.[N]	1	1	Q2UXQ3+tags	Q2UXQ3+tags	Q2UXQ3+tags Q2UXQ3+tags	3	572.984	1716.94	33.4951	1.75	1.85784e+06
	High	[R].AQDSYHFSDcSK.[N]	1	1	Q2UXQ3+tags	Q2UXQ3+tags	Q2UXQ3+tags Q2UXQ3+tags	3	482.198	1444.58	43.9901	2.21	438417
	High	[K].mcGVTLTNWESDKPIKK.[A]	1	1	Q2UXQ3+tags	Q2UXQ3+tags	Q2UXQ3+tags Q2UXQ3+tags	4	506.505	2023	33.5238	2.5	909913
	High	[R].ITHDNAQLLTAVNLNGDTIGR.[A]	1	1	Q2UXQ3+tags	Q2UXQ3+tags	Q2UXQ3+tags Q2UXQ3+tags	2	1118.59	2236.17	33.5444	3.5
	High	[K].ITGLPVGAVK.[Q]	1	1	Q2UXQ3+tags	Q2UXQ3+tags	Q2UXQ3+tags Q2UXQ3+tags	2	477.803	954.598	43.8524	2.01
	High	[R].GETYLIEPLKVPDSESHAVYK.[Y]	1	1	Q2UXQ3+tags	Q2UXQ3+tags	Q2UXQ3+tags Q2UXQ3+tags	3	792.41	2375.22	43.8356	3.64	682731
	High	[R].AVSDDmDDYcSGITSDcAR.[N]	1	1	Q2UXQ3+tags	Q2UXQ3+tags	Q2UXQ3+tags Q2UXQ3+tags	2	1077.41	2153.82	33.6177	3.32	320693
	High	[R].ITHDNAQLLTAVNLNGDTIGR.[A]	1	1	Q2UXQ3+tags	Q2UXQ3+tags	Q2UXQ3+tags Q2UXQ3+tags	3	746.062	2236.17	33.6916	4.42	2.02089e+06
	High	[K].ITGLPVGAVK.[Q]	1	1	Q2UXQ3+tags	Q2UXQ3+tags	Q2UXQ3+tags Q2UXQ3+tags	2	477.803	954.598	33.7279	1.64	1.137e+06
	High	[R].WNDLQGGSGLNDIFEAQK.[I]	1	1	Q2UXQ3+tags	Q2UXQ3+tags	Q2UXQ3+tags Q2UXQ3+tags	2	996.477	1991.95	43.7923	3.45	177336
	High	[K].ASHLVATSEQQHFDPR.[Y]	1	1	Q2UXQ3+tags	Q2UXQ3+tags	Q2UXQ3+tags Q2UXQ3+tags	4	456.476	1822.88	33.7987	2.26	1.06194e+07
	High	[R].IQNDADSTASISAcNGLK.[G]	1	1	Q2UXQ3+tags	Q2UXQ3+tags	Q2UXQ3+tags Q2UXQ3+tags	2	932.943	1864.88	33.8354	5.01	548346
	High	[R].GETYLIEPLKVPDSESHAVYK.[Y]	1	1	Q2UXQ3+tags	Q2UXQ3+tags	Q2UXQ3+tags Q2UXQ3+tags	4	594.559	2375.21	43.6627	2.87	515362
	High	[R].IQNDADSTASISAcNGLK.[G]	1	1	Q2UXQ3+tags	Q2UXQ3+tags	Q2UXQ3+tags Q2UXQ3+tags	2	932.941	1864.88	43.4811	2.64	88013.4
	High	[R].AQDSYHFSDcSK.[N]	1	1	Q2UXQ3+tags	Q2UXQ3+tags	Q2UXQ3+tags Q2UXQ3+tags	3	482.198	1444.58	43.4704	1.4	62090.8
	High	[R].YIQLVIVADHAmVTK.[N]	1	1	Q2UXQ3+tags	Q2UXQ3+tags	Q2UXQ3+tags Q2UXQ3+tags	3	572.984	1716.94	33.9963	2.6
	High	[K].SGNVNDYEVVNPQK.[I]	1	1	Q2UXQ3+tags	Q2UXQ3+tags	Q2UXQ3+tags Q2UXQ3+tags	2	781.877	1562.75	34.0426	2.25	318612
	High	[R].EILNSFGEWR.[Q]	1	1	Q2UXQ3+tags	Q2UXQ3+tags	Q2UXQ3+tags Q2UXQ3+tags	2	625.812	1250.62	43.4142	2.58	508051
	High	[K].ITGLPVGAVK.[Q]	1	1	Q2UXQ3+tags	Q2UXQ3+tags	Q2UXQ3+tags Q2UXQ3+tags	2	477.803	954.598	43.3474	1.72	939185
	High	[K].ITGLPVGAVK.[Q]	1	1	Q2UXQ3+tags	Q2UXQ3+tags	Q2UXQ3+tags Q2UXQ3+tags	2	477.803	954.598	34.2368	1.49	2.40933e+06
	High	[R].AQDSYHFSDcSK.[N]	1	1	Q2UXQ3+tags	Q2UXQ3+tags	Q2UXQ3+tags Q2UXQ3+tags	3	482.198	1444.58	33.4211	2.94	1.75008e+06
	High	[R].YIQLVIVADHAmVTK.[N]	1	1	Q2UXQ3+tags	Q2UXQ3+tags	Q2UXQ3+tags Q2UXQ3+tags	3	572.984	1716.94	35.0122	2.71	3.79058e+06
	High	[R].ITHDNAQLLTAVNLNGDTIGR.[A]	1	1	Q2UXQ3+tags	Q2UXQ3+tags	Q2UXQ3+tags Q2UXQ3+tags	3	746.061	2236.17	35.0649	3.64	2.35331e+08
	High	[R].GETYLIEPLK.[V]	1	1	Q2UXQ3+tags	Q2UXQ3+tags	Q2UXQ3+tags Q2UXQ3+tags	2	581.822	1162.64	35.6732	1.81	4.81981e+06
	High	[K].SGNVNDYEVVNPQK.[I]	1	1	Q2UXQ3+tags	Q2UXQ3+tags	Q2UXQ3+tags Q2UXQ3+tags	2	781.877	1562.75	41.9381	2.61	507398
	High	[R].YIQLVIVADHAmVTK.[N]	1	1	Q2UXQ3+tags	Q2UXQ3+tags	Q2UXQ3+tags Q2UXQ3+tags	3	572.984	1716.94	36.0341	2.69	7.79406e+06
	High	[K].SGNVNDYEVVNPQK.[I]	1	1	Q2UXQ3+tags	Q2UXQ3+tags	Q2UXQ3+tags Q2UXQ3+tags	2	781.877	1562.75	36.0403	2.47	4.68725e+06
	High	[R].GETYLIEPLKVPDSESHAVYK.[Y]	1	1	Q2UXQ3+tags	Q2UXQ3+tags	Q2UXQ3+tags Q2UXQ3+tags	4	594.56	2375.22	36.0546	2.4	1.31955e+07
	High	[K].mcGVTLTNWESDKPIKK.[A]	1	1	Q2UXQ3+tags	Q2UXQ3+tags	Q2UXQ3+tags Q2UXQ3+tags	3	675.005	2023	36.076	2.45
	High	[R].AQDSYHFSDcSK.[N]	1	1	Q2UXQ3+tags	Q2UXQ3+tags	Q2UXQ3+tags Q2UXQ3+tags	3	482.198	1444.58	36.0837	2.31	1.40467e+06
	High	[R].IQNDADSTASISAcNGLK.[G]	1	1	Q2UXQ3+tags	Q2UXQ3+tags	Q2UXQ3+tags Q2UXQ3+tags	2	932.94	1864.87	36.1066	4.29	1.35575e+06
	High	[R].GETYLIEPLKVPDSESHAVYK.[Y]	1	1	Q2UXQ3+tags	Q2UXQ3+tags	Q2UXQ3+tags Q2UXQ3+tags	3	792.409	2375.21	36.1845	2.72	2.32606e+07
	High	[R].GETYLIEPLKVPDSESHAVYK.[Y]	1	1	Q2UXQ3+tags	Q2UXQ3+tags	Q2UXQ3+tags Q2UXQ3+tags	3	792.409	2375.21	41.8127	3.83	1.37083e+06
	High	[R].AQDSYHFSDcSK.[N]	1	1	Q2UXQ3+tags	Q2UXQ3+tags	Q2UXQ3+tags Q2UXQ3+tags	3	482.198	1444.58	41.7537	1.95
	High	[K].ITGLPVGAVK.[Q]	1	1	Q2UXQ3+tags	Q2UXQ3+tags	Q2UXQ3+tags Q2UXQ3+tags	2	477.803	954.598	36.2648	1.79	2.48957e+07
	High	[K].ASHLVATSEQQHFDPR.[Y]	1	1	Q2UXQ3+tags	Q2UXQ3+tags	Q2UXQ3+tags Q2UXQ3+tags	3	608.299	1822.88	36.2745	4	1.68079e+06
	High	[R].WNDLQGGSGLNDIFEAQK.[I]	1	1	Q2UXQ3+tags	Q2UXQ3+tags	Q2UXQ3+tags Q2UXQ3+tags	2	996.476	1991.95	41.7317	4.27
	High	[R].AVSDDmDDYcSGITSDcAR.[N]	1	1	Q2UXQ3+tags	Q2UXQ3+tags	Q2UXQ3+tags Q2UXQ3+tags	2	1077.41	2153.81	36.3967	3.28	164321
	High	[R].GETYLIEPLKVPDSESHAVYK.[Y]	1	1	Q2UXQ3+tags	Q2UXQ3+tags	Q2UXQ3+tags Q2UXQ3+tags	4	594.559	2375.21	41.6385	3.51
	High	[R].YIQLVIVADHAmVTK.[N]	1	1	Q2UXQ3+tags	Q2UXQ3+tags	Q2UXQ3+tags Q2UXQ3+tags	2	858.972	1716.94	41.4877	2.55	823914
	High	[R].YIQLVIVADHAMVTK.[N]	1	1	Q2UXQ3+tags	Q2UXQ3+tags	Q2UXQ3+tags Q2UXQ3+tags	3	567.652	1700.94	36.4699	3.24	281944
	High	[R].YIQLVIVADHAmVTK.[N]	1	1	Q2UXQ3+tags	Q2UXQ3+tags	Q2UXQ3+tags Q2UXQ3+tags	3	572.984	1716.94	36.5447	2.19
	High	[K].SGNVNDYEVVNPQK.[I]	1	1	Q2UXQ3+tags	Q2UXQ3+tags	Q2UXQ3+tags Q2UXQ3+tags	2	781.876	1562.75	36.5452	3.27	4.17436e+06
	High	[R].ITHDNAQLLTAVNLNGDTIGR.[A]	1	1	Q2UXQ3+tags	Q2UXQ3+tags	Q2UXQ3+tags Q2UXQ3+tags	3	746.062	2236.17	41.9557	3.26	223579
	High	[R].EILNSFGEWR.[Q]	1	1	Q2UXQ3+tags	Q2UXQ3+tags	Q2UXQ3+tags Q2UXQ3+tags	2	625.812	1250.62	42.4	2.67	1.67903e+06
	High	[R].YIQLVIVADHAmVTK.[N]	1	1	Q2UXQ3+tags	Q2UXQ3+tags	Q2UXQ3+tags Q2UXQ3+tags	3	572.983	1716.94	41.9875	2.52
	High	[R].GETYLIEPLKVPDSESHAVYK.[Y]	1	1	Q2UXQ3+tags	Q2UXQ3+tags	Q2UXQ3+tags Q2UXQ3+tags	4	594.559	2375.21	42.1413	3.15	2.78001e+06
	High	[R].ITHDNAQLLTAVNLNGDTIGR.[A]	1	1	Q2UXQ3+tags	Q2UXQ3+tags	Q2UXQ3+tags Q2UXQ3+tags	2	1118.59	2236.17	35.0783	4.39	1.17003e+07
	High	[R].YIQLVIVADHAMVTK.[N]	1	1	Q2UXQ3+tags	Q2UXQ3+tags	Q2UXQ3+tags Q2UXQ3+tags	2	850.974	1700.94	35.1192	2.41	584297
	High	[K].GLFSEDYSETHYSPDGSEITTNPPVEDHcYYYGR.[I]	1	1	Q2UXQ3+tags	Q2UXQ3+tags	Q2UXQ3+tags Q2UXQ3+tags	4	997.176	3985.68	35.1456	3.96	5.22849e+06
	High	[K].mcGVTLTNWESDKPIKK.[A]	1	1	Q2UXQ3+tags	Q2UXQ3+tags	Q2UXQ3+tags Q2UXQ3+tags	4	506.505	2023	35.1462	1.97	1.03375e+06
	High	[R].GETYLIEPLK.[V]	1	1	Q2UXQ3+tags	Q2UXQ3+tags	Q2UXQ3+tags Q2UXQ3+tags	2	581.822	1162.64	35.1508	2.43	3.07022e+06
	High	[R].GETYLIEPLKVPDSESHAVYK.[Y]	1	1	Q2UXQ3+tags	Q2UXQ3+tags	Q2UXQ3+tags Q2UXQ3+tags	3	792.41	2375.21	35.1603	2.98	1.78298e+07
	High	[K].ITGLPVGAVK.[Q]	1	1	Q2UXQ3+tags	Q2UXQ3+tags	Q2UXQ3+tags Q2UXQ3+tags	2	477.803	954.598	42.3332	1.55	201927
	High	[R].GETYLIEPLKVPDSESHAVYK.[Y]	1	1	Q2UXQ3+tags	Q2UXQ3+tags	Q2UXQ3+tags Q2UXQ3+tags	3	792.41	2375.21	42.3145	3.79
	High	[R].WNDLQGGSGLNDIFEAQK.[I]	1	1	Q2UXQ3+tags	Q2UXQ3+tags	Q2UXQ3+tags Q2UXQ3+tags	2	996.478	1991.95	42.2564	3.97	130713
	High	[K].ITGLPVGAVK.[Q]	1	1	Q2UXQ3+tags	Q2UXQ3+tags	Q2UXQ3+tags Q2UXQ3+tags	2	477.803	954.598	35.2535	1.65	1.3427e+06
	High	[K].ASHLVATSEQQHFDPR.[Y]	1	1	Q2UXQ3+tags	Q2UXQ3+tags	Q2UXQ3+tags Q2UXQ3+tags	4	456.476	1822.88	35.334	2.51	4.24894e+06
	High	[R].AVSDDmDDYcSGITSDcAR.[N]	1	1	Q2UXQ3+tags	Q2UXQ3+tags	Q2UXQ3+tags Q2UXQ3+tags	2	1077.41	2153.81	35.3413	3.07	285983
	High	[K].SGNVNDYEVVNPQK.[I]	1	1	Q2UXQ3+tags	Q2UXQ3+tags	Q2UXQ3+tags Q2UXQ3+tags	2	781.877	1562.75	35.3646	3.71	3.15858e+06
	High	[R].IQNDADSTASISAcNGLK.[G]	1	1	Q2UXQ3+tags	Q2UXQ3+tags	Q2UXQ3+tags Q2UXQ3+tags	2	932.94	1864.87	35.4356	3.17	3.05241e+06
	High	[R].AQDSYHFSDcSK.[N]	1	1	Q2UXQ3+tags	Q2UXQ3+tags	Q2UXQ3+tags Q2UXQ3+tags	3	482.198	1444.58	35.5015	2.33	1.89839e+06
	High	[R].YIQLVIVADHAmVTK.[N]	1	1	Q2UXQ3+tags	Q2UXQ3+tags	Q2UXQ3+tags Q2UXQ3+tags	3	572.984	1716.94	35.5218	2.49	9.367e+06
	High	[K].SGNVNDYEVVNPQK.[I]	1	1	Q2UXQ3+tags	Q2UXQ3+tags	Q2UXQ3+tags Q2UXQ3+tags	2	781.875	1562.74	28.7539	4.02	5.78495e+06
	High	[K].ITGLPVGAVK.[Q]	1	1	Q2UXQ3+tags	Q2UXQ3+tags	Q2UXQ3+tags Q2UXQ3+tags	2	477.803	954.598	39.8076	1.96	1.31936e+06
	High	[R].AVSDDmDDYcSGITSDcAR.[N]	1	1	Q2UXQ3+tags	Q2UXQ3+tags	Q2UXQ3+tags Q2UXQ3+tags	2	1077.42	2153.82	22.1243	3.03
	High	[K].VPDSESHAVYK.[Y]	1	1	Q2UXQ3+tags	Q2UXQ3+tags	Q2UXQ3+tags Q2UXQ3+tags	2	616.302	1231.6	16.9881	2.71	1.54667e+07
	High	[R].GETYLIEPLKVPDSESHAVYK.[Y]	1	1	Q2UXQ3+tags	Q2UXQ3+tags	Q2UXQ3+tags Q2UXQ3+tags	3	792.41	2375.22	53.9583	2.49
	High	[K].KASHLVATSEQQHFDPR.[Y]	1	1	Q2UXQ3+tags	Q2UXQ3+tags	Q2UXQ3+tags Q2UXQ3+tags	3	650.998	1950.98	16.9828	4.24	1.30152e+08
	High	[R].AQDSYHFSDcSK.[N]	1	1	Q2UXQ3+tags	Q2UXQ3+tags	Q2UXQ3+tags Q2UXQ3+tags	3	482.198	1444.58	22.2048	1.81	4.67801e+06
	High	[K].SGNVNDYEVVNPQK.[I]	1	1	Q2UXQ3+tags	Q2UXQ3+tags	Q2UXQ3+tags Q2UXQ3+tags	2	781.876	1562.75	53.6275	3.02
	High	[R].EILNSFGEWR.[Q]	1	1	Q2UXQ3+tags	Q2UXQ3+tags	Q2UXQ3+tags Q2UXQ3+tags	2	625.812	1250.62	53.5291	2.63	350310
	High	[K].ITGLPVGAVK.[Q]	1	1	Q2UXQ3+tags	Q2UXQ3+tags	Q2UXQ3+tags Q2UXQ3+tags	2	477.803	954.598	53.4953	1.75	218262
	High	[R].GETYLIEPLKVPDSESHAVYK.[Y]	1	1	Q2UXQ3+tags	Q2UXQ3+tags	Q2UXQ3+tags Q2UXQ3+tags	3	792.41	2375.21	53.4494	3.08	678631
	High	[K].ITGLPVGAVK.[Q]	1	1	Q2UXQ3+tags	Q2UXQ3+tags	Q2UXQ3+tags Q2UXQ3+tags	2	477.803	954.598	58.5542	1.31	113569
	High	[R].WNDLQGGSGLNDIFEAQK.[I]	1	1	Q2UXQ3+tags	Q2UXQ3+tags	Q2UXQ3+tags Q2UXQ3+tags	2	996.476	1991.95	53.4331	3.98	45255.3
	High	[R].IQNDADSTASISAcNGLK.[G]	1	1	Q2UXQ3+tags	Q2UXQ3+tags	Q2UXQ3+tags Q2UXQ3+tags	2	932.94	1864.87	53.3955	4.2	118524
	High	[R].GETYLIEPLKVPDSESHAVYK.[Y]	1	1	Q2UXQ3+tags	Q2UXQ3+tags	Q2UXQ3+tags Q2UXQ3+tags	4	594.559	2375.22	53.315	4.47
	High	[R].YIQLVIVADHAmVTK.[N]	1	1	Q2UXQ3+tags	Q2UXQ3+tags	Q2UXQ3+tags Q2UXQ3+tags	3	572.983	1716.93	52.9604	1.6	99818.1
	High	[K].VPDSESHAVYK.[Y]	1	1	Q2UXQ3+tags	Q2UXQ3+tags	Q2UXQ3+tags Q2UXQ3+tags	3	411.203	1231.6	16.6086	2.48	1.41825e+08
	High	[R].GETYLIEPLK.[V]	1	1	Q2UXQ3+tags	Q2UXQ3+tags	Q2UXQ3+tags Q2UXQ3+tags	2	581.822	1162.64	52.8659	1.88	87888.3
	High	[R].YIQLVIVADHAmVTK.[N]	1	1	Q2UXQ3+tags	Q2UXQ3+tags	Q2UXQ3+tags Q2UXQ3+tags	2	858.972	1716.94	58.4713	2.18	66551
	High	[R].WNDLQGGSGLNDIFEAQK.[I]	1	1	Q2UXQ3+tags	Q2UXQ3+tags	Q2UXQ3+tags Q2UXQ3+tags	2	996.477	1991.95	54.9462	3.44
	High	[R].EILNSFGEWR.[Q]	1	1	Q2UXQ3+tags	Q2UXQ3+tags	Q2UXQ3+tags Q2UXQ3+tags	2	625.812	1250.62	54.5377	2.4	817229
	High	[R].AQDSYHFSDcSK.[N]	1	1	Q2UXQ3+tags	Q2UXQ3+tags	Q2UXQ3+tags Q2UXQ3+tags	3	482.198	1444.58	21.6988	2.12	2.30192e+06
	High	[K].ASHLVATSEQQHFDPR.[Y]	1	1	Q2UXQ3+tags	Q2UXQ3+tags	Q2UXQ3+tags Q2UXQ3+tags	4	456.476	1822.88	22.4086	2.13	8.12873e+06
	High	[K].VPDSESHAVYK.[Y]	1	1	Q2UXQ3+tags	Q2UXQ3+tags	Q2UXQ3+tags Q2UXQ3+tags	3	411.203	1231.6	21.7203	1.94	1.0539e+06
	High	[K].ASHLVATSEQQHFDPR.[Y]	1	1	Q2UXQ3+tags	Q2UXQ3+tags	Q2UXQ3+tags Q2UXQ3+tags	2	911.947	1822.89	21.766	4.21	485885
	High	[K].VPDSESHAVYK.[Y]	1	1	Q2UXQ3+tags	Q2UXQ3+tags	Q2UXQ3+tags Q2UXQ3+tags	3	411.203	1231.6	17.1111	2.04
	High	[K].KASHLVATSEQQHFDPR.[Y]	1	1	Q2UXQ3+tags	Q2UXQ3+tags	Q2UXQ3+tags Q2UXQ3+tags	2	975.995	1950.98	17.0654	4.47	3.89504e+06
	High	[K].KASHLVATSEQQHFDPR.[Y]	1	1	Q2UXQ3+tags	Q2UXQ3+tags	Q2UXQ3+tags Q2UXQ3+tags	4	488.5	1950.98	17.0378	4.02	5.88686e+08
	High	[K].SGNVNDYEVVNPQK.[I]	1	1	Q2UXQ3+tags	Q2UXQ3+tags	Q2UXQ3+tags Q2UXQ3+tags	2	781.876	1562.74	54.1332	2.67
	High	[R].YIQLVIVADHAmVTK.[N]	1	1	Q2UXQ3+tags	Q2UXQ3+tags	Q2UXQ3+tags Q2UXQ3+tags	3	572.984	1716.94	58.5223	1.66	51633.4
	High	[K].ASHLVATSEQQHFDPR.[Y]	1	1	Q2UXQ3+tags	Q2UXQ3+tags	Q2UXQ3+tags Q2UXQ3+tags	4	456.476	1822.88	21.903	2.06
	High	[R].EILNSFGEWR.[Q]	1	1	Q2UXQ3+tags	Q2UXQ3+tags	Q2UXQ3+tags Q2UXQ3+tags	2	625.812	1250.62	54.0317	2.35
	High	[K].VPDSESHAVYK.[Y]	1	1	Q2UXQ3+tags	Q2UXQ3+tags	Q2UXQ3+tags Q2UXQ3+tags	2	616.302	1231.6	16.4851	2.53
	High	[K].ASHLVATSEQQHFDPR.[Y]	1	1	Q2UXQ3+tags	Q2UXQ3+tags	Q2UXQ3+tags Q2UXQ3+tags	3	608.299	1822.88	22.7022	1.74	2.72251e+06
	High	[K].SGNVNDYEVVNPQK.[I]	1	1	Q2UXQ3+tags	Q2UXQ3+tags	Q2UXQ3+tags Q2UXQ3+tags	2	781.877	1562.75	52.1107	2.05	141112
	High	[R].EILNSFGEWR.[Q]	1	1	Q2UXQ3+tags	Q2UXQ3+tags	Q2UXQ3+tags Q2UXQ3+tags	2	625.812	1250.62	52.0111	2.53	715940
	High	[K].ITGLPVGAVK.[Q]	1	1	Q2UXQ3+tags	Q2UXQ3+tags	Q2UXQ3+tags Q2UXQ3+tags	2	477.803	954.598	51.9777	1.43	836792
	High	[R].EILNSFGEWR.[Q]	1	1	Q2UXQ3+tags	Q2UXQ3+tags	Q2UXQ3+tags Q2UXQ3+tags	2	625.812	1250.62	59.606	2.49	307214
	High	[R].GETYLIEPLKVPDSESHAVYK.[Y]	1	1	Q2UXQ3+tags	Q2UXQ3+tags	Q2UXQ3+tags Q2UXQ3+tags	3	792.41	2375.21	51.9294	3.77	433585
	High	[R].ITHDNAQLLTAVNLNGDTIGR.[A]	1	1	Q2UXQ3+tags	Q2UXQ3+tags	Q2UXQ3+tags Q2UXQ3+tags	3	746.061	2236.17	51.9041	2.89	44670.5
	High	[R].WNDLQGGSGLNDIFEAQK.[I]	1	1	Q2UXQ3+tags	Q2UXQ3+tags	Q2UXQ3+tags Q2UXQ3+tags	2	996.477	1991.95	51.8927	2.8	155868
	High	[R].IQNDADSTASISAcNGLK.[G]	1	1	Q2UXQ3+tags	Q2UXQ3+tags	Q2UXQ3+tags Q2UXQ3+tags	2	932.94	1864.87	51.8831	3.74	88089.4
	High	[R].AYmESMcDPKK.[S]	1	1	Q2UXQ3+tags	Q2UXQ3+tags	Q2UXQ3+tags Q2UXQ3+tags	3	459.195	1375.57	15.6167	2.31	815228
	High	[R].AVSDDmDDYcSGITSDcAR.[N]	1	1	Q2UXQ3+tags	Q2UXQ3+tags	Q2UXQ3+tags Q2UXQ3+tags	2	1077.41	2153.81	59.6775	3.06	38163.6
	High	[K].SGNVNDYEVVNPQK.[I]	1	1	Q2UXQ3+tags	Q2UXQ3+tags	Q2UXQ3+tags Q2UXQ3+tags	2	781.877	1562.75	51.6053	3.02	188448
	High	[K].ITGLPVGAVKQPEK.[K]	1	1	Q2UXQ3+tags	Q2UXQ3+tags	Q2UXQ3+tags Q2UXQ3+tags	3	479.621	1436.85	23.226	2.55	2.2446e+08
	High	[K].ITGLPVGAVK.[Q]	1	1	Q2UXQ3+tags	Q2UXQ3+tags	Q2UXQ3+tags Q2UXQ3+tags	2	477.803	954.598	59.5611	1.31	158784
	High	[R].GETYLIEPLKVPDSESHAVYK.[Y]	1	1	Q2UXQ3+tags	Q2UXQ3+tags	Q2UXQ3+tags Q2UXQ3+tags	4	594.559	2375.21	52.3072	3.19	248644
	High	[R].AQDSYHFSDcSK.[N]	1	1	Q2UXQ3+tags	Q2UXQ3+tags	Q2UXQ3+tags Q2UXQ3+tags	3	482.198	1444.58	22.7104	3.03	2628373
	High	[R].YIQLVIVADHAmVTK.[N]	1	1	Q2UXQ3+tags	Q2UXQ3+tags	Q2UXQ3+tags Q2UXQ3+tags	3	572.983	1716.94	59.0308	2.07	114204
	High	[R].EILNSFGEWR.[Q]	1	1	Q2UXQ3+tags	Q2UXQ3+tags	Q2UXQ3+tags Q2UXQ3+tags	2	625.812	1250.62	52.5146	2.09	356733
	High	[K].TLKSGNVNDYEVVNPQK.[I]	1	1	Q2UXQ3+tags	Q2UXQ3+tags	Q2UXQ3+tags Q2UXQ3+tags	3	635.663	1904.97	22.7899	3.84	7.07581e+07
	High	[K].ITGLPVGAVK.[Q]	1	1	Q2UXQ3+tags	Q2UXQ3+tags	Q2UXQ3+tags Q2UXQ3+tags	2	477.803	954.598	52.4804	1.34	716495
	High	[R].YIQLVIVADHAmVTK.[N]	1	1	Q2UXQ3+tags	Q2UXQ3+tags	Q2UXQ3+tags Q2UXQ3+tags	3	572.983	1716.94	52.4521	2.38	221925
	High	[K].SGNVNDYEVVNPQK.[I]	1	1	Q2UXQ3+tags	Q2UXQ3+tags	Q2UXQ3+tags Q2UXQ3+tags	2	781.877	1562.75	52.6177	1.99
	High	[K].TLKSGNVNDYEVVNPQK.[I]	1	1	Q2UXQ3+tags	Q2UXQ3+tags	Q2UXQ3+tags Q2UXQ3+tags	2	952.992	1904.98	22.8637	4.31	9.39789e+06
	High	[R].IQNDADSTASISAcNGLK.[G]	1	1	Q2UXQ3+tags	Q2UXQ3+tags	Q2UXQ3+tags Q2UXQ3+tags	2	932.941	1864.88	52.3882	2.09	195301
	High	[R].GETYLIEPLK.[V]	1	1	Q2UXQ3+tags	Q2UXQ3+tags	Q2UXQ3+tags Q2UXQ3+tags	2	581.822	1162.64	52.3645	2	109571
	High	[R].AQDSYHFSDcSK.[N]	1	1	Q2UXQ3+tags	Q2UXQ3+tags	Q2UXQ3+tags Q2UXQ3+tags	3	482.198	1444.58	52.3622	2.04	199882
	High	[K].ITGLPVGAVK.[Q]	1	1	Q2UXQ3+tags	Q2UXQ3+tags	Q2UXQ3+tags Q2UXQ3+tags	2	477.803	954.598	59.057	1.69	256457
	High	[R].ITHDNAQLLTAVNLNGDTIGR.[A]	1	1	Q2UXQ3+tags	Q2UXQ3+tags	Q2UXQ3+tags Q2UXQ3+tags	3	746.061	2236.17	59.5016	2.24	28345.4
	High	[K].VPDSESHAVYK.[Y]	1	1	Q2UXQ3+tags	Q2UXQ3+tags	Q2UXQ3+tags Q2UXQ3+tags	3	411.203	1231.6	16.101	2.79	2.37069e+07
	High	[K].ASHLVATSEQQHFDPR.[Y]	1	1	Q2UXQ3+tags	Q2UXQ3+tags	Q2UXQ3+tags Q2UXQ3+tags	3	608.3	1822.89	23.7165	2.97	24989518
	High	[R].GETYLIEPLKVPDSESHAVYK.[Y]	1	1	Q2UXQ3+tags	Q2UXQ3+tags	Q2UXQ3+tags Q2UXQ3+tags	3	792.409	2375.21	54.9691	2.32	191421
	High	[R].AQDSYHFSDcSK.[N]	1	1	Q2UXQ3+tags	Q2UXQ3+tags	Q2UXQ3+tags Q2UXQ3+tags	2	722.794	1444.58	18.1648	3.49
	High	[R].AQDSYHFSDcSK.[N]	1	1	Q2UXQ3+tags	Q2UXQ3+tags	Q2UXQ3+tags Q2UXQ3+tags	3	482.199	1444.58	18.1582	2.41
	High	[K].ASHLVATSEQQHFDPR.[Y]	1	1	Q2UXQ3+tags	Q2UXQ3+tags	Q2UXQ3+tags Q2UXQ3+tags	2	911.946	1822.88	19.5742	4.47	12800693675
	High	[K].VPDSESHAVYK.[Y]	1	1	Q2UXQ3+tags	Q2UXQ3+tags	Q2UXQ3+tags Q2UXQ3+tags	3	411.203	1231.59	19.6353	2.49	5.11326e+06
	High	[K].ITGLPVGAVK.[Q]	1	1	Q2UXQ3+tags	Q2UXQ3+tags	Q2UXQ3+tags Q2UXQ3+tags	2	477.803	954.598	56.5238	1.66	89883.8
	High	[R].AQDSYHFSDcSK.[N]	1	1	Q2UXQ3+tags	Q2UXQ3+tags	Q2UXQ3+tags Q2UXQ3+tags	2	722.796	1444.58	19.8798	3.38
	High	[K].VPDSESHAVYK.[Y]	1	1	Q2UXQ3+tags	Q2UXQ3+tags	Q2UXQ3+tags Q2UXQ3+tags	3	411.203	1231.6	18.1181	2.16	1.16898e+07
	High	[K].ITGLPVGAVK.[Q]	1	1	Q2UXQ3+tags	Q2UXQ3+tags	Q2UXQ3+tags Q2UXQ3+tags	2	477.803	954.598	58.0479	1.29	328677
	High	[R].EILNSFGEWR.[Q]	1	1	Q2UXQ3+tags	Q2UXQ3+tags	Q2UXQ3+tags Q2UXQ3+tags	2	625.812	1250.62	58.0825	2.7	813456
	High	[R].EILNSFGEWR.[Q]	1	1	Q2UXQ3+tags	Q2UXQ3+tags	Q2UXQ3+tags Q2UXQ3+tags	2	625.812	1250.62	56.5497	2.27	421739
	High	[R].ITHDNAQLLTAVNLNGDTIGR.[A]	1	1	Q2UXQ3+tags	Q2UXQ3+tags	Q2UXQ3+tags Q2UXQ3+tags	3	746.062	2236.17	56.627	3.13	40912
	High	[R].AQDSYHFSDcSK.[N]	1	1	Q2UXQ3+tags	Q2UXQ3+tags	Q2UXQ3+tags Q2UXQ3+tags	3	482.199	1444.58	19.1673	2.61	6.94479e+07
	High	[R].WNDLQGGSGLNDIFEAQK.[I]	1	1	Q2UXQ3+tags	Q2UXQ3+tags	Q2UXQ3+tags Q2UXQ3+tags	2	996.478	1991.95	56.9836	2.97	92127.6
	High	[R].AQDSYHFSDcSK.[N]	1	1	Q2UXQ3+tags	Q2UXQ3+tags	Q2UXQ3+tags Q2UXQ3+tags	3	482.199	1444.58	18.4878	2.61	150538628
	High	[R].AYMESMcDPKK.[S]	1	1	Q2UXQ3+tags	Q2UXQ3+tags	Q2UXQ3+tags Q2UXQ3+tags	3	453.863	1359.57	18.468	2.06	6.72814e+07
	High	[R].AQDSYHFSDcSK.[N]	1	1	Q2UXQ3+tags	Q2UXQ3+tags	Q2UXQ3+tags Q2UXQ3+tags	3	482.198	1444.58	18.6648	2.6	150538628
	High	[K].SGNVNDYEVVNPQK.[I]	1	1	Q2UXQ3+tags	Q2UXQ3+tags	Q2UXQ3+tags Q2UXQ3+tags	2	781.875	1562.74	57.6601	3.54	112944
	High	[R].IQNDADSTASISAcNGLK.[G]	1	1	Q2UXQ3+tags	Q2UXQ3+tags	Q2UXQ3+tags Q2UXQ3+tags	2	932.94	1864.87	57.955	3.88	79686.6
	High	[R].EILNSFGEWR.[Q]	1	1	Q2UXQ3+tags	Q2UXQ3+tags	Q2UXQ3+tags Q2UXQ3+tags	2	625.812	1250.62	57.576	2.72	716419
	High	[K].ITGLPVGAVK.[Q]	1	1	Q2UXQ3+tags	Q2UXQ3+tags	Q2UXQ3+tags Q2UXQ3+tags	2	477.803	954.598	57.5404	1.33	470764
	High	[R].GETYLIEPLKVPDSESHAVYK.[Y]	1	1	Q2UXQ3+tags	Q2UXQ3+tags	Q2UXQ3+tags Q2UXQ3+tags	3	792.41	2375.22	57.5046	1.81	229699
	High	[R].IQNDADSTASISAcNGLK.[G]	1	1	Q2UXQ3+tags	Q2UXQ3+tags	Q2UXQ3+tags Q2UXQ3+tags	2	932.941	1864.87	57.4391	1.8	78794.1
	High	[R].WNDLQGGSGLNDIFEAQK.[I]	1	1	Q2UXQ3+tags	Q2UXQ3+tags	Q2UXQ3+tags Q2UXQ3+tags	2	996.476	1991.94	57.9897	2.26	144747
	High	[R].YIQLVIVADHAmVTK.[N]	1	1	Q2UXQ3+tags	Q2UXQ3+tags	Q2UXQ3+tags Q2UXQ3+tags	3	572.984	1716.94	58.0213	1.86	60250.3
	High	[K].SGNVNDYEVVNPQK.[I]	1	1	Q2UXQ3+tags	Q2UXQ3+tags	Q2UXQ3+tags Q2UXQ3+tags	2	781.876	1562.75	57.1561	1.96	80018.2
	High	[K].ASHLVATSEQQHFDPR.[Y]	1	1	Q2UXQ3+tags	Q2UXQ3+tags	Q2UXQ3+tags Q2UXQ3+tags	2	911.945	1822.88	19.069	3.61
	High	[K].VPDSESHAVYK.[Y]	1	1	Q2UXQ3+tags	Q2UXQ3+tags	Q2UXQ3+tags Q2UXQ3+tags	3	411.203	1231.59	19.1277	2.71	6.56653e+06
	High	[R].EILNSFGEWR.[Q]	1	1	Q2UXQ3+tags	Q2UXQ3+tags	Q2UXQ3+tags Q2UXQ3+tags	2	625.812	1250.62	57.0592	2.15	915230
	High	[R].AQDSYHFSDcSK.[N]	1	1	Q2UXQ3+tags	Q2UXQ3+tags	Q2UXQ3+tags Q2UXQ3+tags	2	722.795	1444.58	18.9601	4.08	1.63449e+07
	High	[K].ASHLVATSEQQHFDPR.[Y]	1	1	Q2UXQ3+tags	Q2UXQ3+tags	Q2UXQ3+tags Q2UXQ3+tags	3	608.3	1822.88	20.0602	3.27
	High	[K].ASHLVATSEQQHFDPR.[Y]	1	1	Q2UXQ3+tags	Q2UXQ3+tags	Q2UXQ3+tags Q2UXQ3+tags	2	911.945	1822.88	20.0803	4.38
	High	[R].AQDSYHFSDcSK.[N]	1	1	Q2UXQ3+tags	Q2UXQ3+tags	Q2UXQ3+tags Q2UXQ3+tags	3	482.198	1444.58	20.6936	2.78	7.72863e+06
	High	[K].ITGLPVGAVK.[Q]	1	1	Q2UXQ3+tags	Q2UXQ3+tags	Q2UXQ3+tags Q2UXQ3+tags	2	477.803	954.598	55.5144	1.69	1.06471e+06
	High	[R].YIQLVIVADHAmVTK.[N]	1	1	Q2UXQ3+tags	Q2UXQ3+tags	Q2UXQ3+tags Q2UXQ3+tags	3	572.983	1716.94	55.4962	1.78	131063
	High	[R].GETYLIEPLKVPDSESHAVYK.[Y]	1	1	Q2UXQ3+tags	Q2UXQ3+tags	Q2UXQ3+tags Q2UXQ3+tags	3	792.41	2375.22	55.4773	2.85
	High	[R].IQNDADSTASISAcNGLK.[G]	1	1	Q2UXQ3+tags	Q2UXQ3+tags	Q2UXQ3+tags Q2UXQ3+tags	2	932.94	1864.87	55.4186	2.06	136926
	High	[R].YIQLVIVADHAmVTK.[N]	1	1	Q2UXQ3+tags	Q2UXQ3+tags	Q2UXQ3+tags Q2UXQ3+tags	2	858.972	1716.94	55.3342	2	35695
	High	[K].SGNVNDYEVVNPQK.[I]	1	1	Q2UXQ3+tags	Q2UXQ3+tags	Q2UXQ3+tags Q2UXQ3+tags	2	781.877	1562.75	55.1386	3.25	570242
	High	[R].AQDSYHFSDcSK.[N]	1	1	Q2UXQ3+tags	Q2UXQ3+tags	Q2UXQ3+tags Q2UXQ3+tags	2	722.793	1444.58	21.0862	3.66	1.79524e+06
	High	[R].AQDSYHFSDcSK.[N]	1	1	Q2UXQ3+tags	Q2UXQ3+tags	Q2UXQ3+tags Q2UXQ3+tags	3	482.198	1444.58	58.339	1.31	98410.6
	High	[R].GETYLIEPLKVPDSESHAVYK.[Y]	1	1	Q2UXQ3+tags	Q2UXQ3+tags	Q2UXQ3+tags Q2UXQ3+tags	4	594.559	2375.21	58.4705	2.31	135592
	High	[R].AQDSYHFSDcSK.[N]	1	1	Q2UXQ3+tags	Q2UXQ3+tags	Q2UXQ3+tags Q2UXQ3+tags	3	482.198	1444.58	21.197	2.5	4.486e+06
	High	[R].AQDSYHFSDcSK.[N]	1	1	Q2UXQ3+tags	Q2UXQ3+tags	Q2UXQ3+tags Q2UXQ3+tags	3	482.198	1444.58	55.0508	2.18	178848
	High	[K].ITGLPVGAVK.[Q]	1	1	Q2UXQ3+tags	Q2UXQ3+tags	Q2UXQ3+tags Q2UXQ3+tags	2	477.803	954.598	55.0103	1.38	1.18897e+06
	High	[K].ASHLVATSEQQHFDPR.[Y]	1	1	Q2UXQ3+tags	Q2UXQ3+tags	Q2UXQ3+tags Q2UXQ3+tags	2	911.946	1822.88	20.6742	3.81	942429
	High	[K].KASHLVATSEQQHFDPR.[Y]	1	1	Q2UXQ3+tags	Q2UXQ3+tags	Q2UXQ3+tags Q2UXQ3+tags	3	650.998	1950.98	17.4928	3.06	2.09101e+07
	High	[R].AYMESmcDPK.[K]	1	1	Q2UXQ3+tags	Q2UXQ3+tags	Q2UXQ3+tags Q2UXQ3+tags	2	624.241	1247.47	17.494	2.43	3.6566e+09
	High	[R].ITHDNAQLLTAVNLNGDTIGR.[A]	1	1	Q2UXQ3+tags	Q2UXQ3+tags	Q2UXQ3+tags Q2UXQ3+tags	3	746.062	2236.17	56.1183	4.24	32167.6
	High	[K].VPDSESHAVYK.[Y]	1	1	Q2UXQ3+tags	Q2UXQ3+tags	Q2UXQ3+tags Q2UXQ3+tags	3	411.203	1231.59	20.1465	1.73	2.69472e+06
	High	[R].AQDSYHFSDcSK.[N]	1	1	Q2UXQ3+tags	Q2UXQ3+tags	Q2UXQ3+tags Q2UXQ3+tags	3	482.199	1444.58	20.1924	2.67	3.9938e+06
	High	[R].AQDSYHFSDcSK.[N]	1	1	Q2UXQ3+tags	Q2UXQ3+tags	Q2UXQ3+tags Q2UXQ3+tags	3	482.198	1444.58	56.0833	1.86	55165.4
	High	[R].EILNSFGEWR.[Q]	1	1	Q2UXQ3+tags	Q2UXQ3+tags	Q2UXQ3+tags Q2UXQ3+tags	2	625.812	1250.62	56.0442	2.27	68027.4
	High	[K].ASHLVATSEQQHFDPR.[Y]	1	1	Q2UXQ3+tags	Q2UXQ3+tags	Q2UXQ3+tags Q2UXQ3+tags	4	456.477	1822.88	20.316	2.81
	High	[R].GETYLIEPLKVPDSESHAVYK.[Y]	1	1	Q2UXQ3+tags	Q2UXQ3+tags	Q2UXQ3+tags Q2UXQ3+tags	3	792.41	2375.22	55.9849	3.19	71743.8
	High	[R].AQDSYHFSDcSK.[N]	1	1	Q2UXQ3+tags	Q2UXQ3+tags	Q2UXQ3+tags Q2UXQ3+tags	2	722.794	1444.58	20.0737	3.97	1693412
	High	[R].IQNDADSTASISAcNGLK.[G]	1	1	Q2UXQ3+tags	Q2UXQ3+tags	Q2UXQ3+tags Q2UXQ3+tags	2	932.941	1864.87	55.9277	2.94	82583.7
	High	[R].AQDSYHFSDcSK.[N]	1	1	Q2UXQ3+tags	Q2UXQ3+tags	Q2UXQ3+tags Q2UXQ3+tags	2	722.794	1444.58	17.6638	3.83	1.20315e+10
	High	[R].AQDSYHFSDcSK.[N]	1	1	Q2UXQ3+tags	Q2UXQ3+tags	Q2UXQ3+tags Q2UXQ3+tags	3	482.198	1444.58	17.6564	2.91	28675557637
	High	[K].SGNVNDYEVVNPQK.[I]	1	1	Q2UXQ3+tags	Q2UXQ3+tags	Q2UXQ3+tags Q2UXQ3+tags	2	781.877	1562.75	55.6426	3.44	469692
	High	[K].VPDSESHAVYK.[Y]	1	1	Q2UXQ3+tags	Q2UXQ3+tags	Q2UXQ3+tags Q2UXQ3+tags	3	411.203	1231.6	17.6156	2.18	9.46067e+06
	High	[R].AQDSYHFSDcSK.[N]	1	1	Q2UXQ3+tags	Q2UXQ3+tags	Q2UXQ3+tags Q2UXQ3+tags	2	722.793	1444.58	20.5843	3.56	2.57796e+06
	High	[R].AQDSYHFSDcSK.[N]	1	1	Q2UXQ3+tags	Q2UXQ3+tags	Q2UXQ3+tags Q2UXQ3+tags	3	482.198	1444.58	55.5656	2.67	112829
	High	[R].EILNSFGEWR.[Q]	1	1	Q2UXQ3+tags	Q2UXQ3+tags	Q2UXQ3+tags Q2UXQ3+tags	2	625.812	1250.62	55.5427	2.48	683024
	High	[K].SGNVNDYEVVNPQK.[I]	1	1	Q2UXQ3+tags	Q2UXQ3+tags	Q2UXQ3+tags Q2UXQ3+tags	2	781.878	1562.75	23.749	3.35	8.47329e+10
	High	[K].ASHLVATSEQQHFDPR.[Y]	1	1	Q2UXQ3+tags	Q2UXQ3+tags	Q2UXQ3+tags Q2UXQ3+tags	2	911.945	1822.88	51.7147	2.12	14125.4
	High	[K].ITGLPVGAVK.[Q]	1	1	Q2UXQ3+tags	Q2UXQ3+tags	Q2UXQ3+tags Q2UXQ3+tags	2	477.803	954.598	51.4719	1.8	1.02427e+06
	High	[R].AVSDDmDDYcSGITSDcAR.[N]	1	1	Q2UXQ3+tags	Q2UXQ3+tags	Q2UXQ3+tags Q2UXQ3+tags	3	718.608	2153.81	26.1443	2.75
	High	[K].SGNVNDYEVVNPQK.[I]	1	1	Q2UXQ3+tags	Q2UXQ3+tags	Q2UXQ3+tags Q2UXQ3+tags	2	781.877	1562.75	26.178	3.41	2.7402e+07
	High	[R].EILNSFGEWR.[Q]	1	1	Q2UXQ3+tags	Q2UXQ3+tags	Q2UXQ3+tags Q2UXQ3+tags	2	625.812	1250.62	62.1406	2.27	536448
	High	[R].AVSDDmDDYcSGITSDcAR.[N]	1	1	Q2UXQ3+tags	Q2UXQ3+tags	Q2UXQ3+tags Q2UXQ3+tags	2	1077.41	2153.8	49.1677	2.48	68351.5
	High	[R].AVSDDmDDYcSGITSDcAR.[N]	1	1	Q2UXQ3+tags	Q2UXQ3+tags	Q2UXQ3+tags Q2UXQ3+tags	2	1077.41	2153.81	26.2262	2.93
	High	[R].IQNDADSTASISAcNGLK.[G]	1	1	Q2UXQ3+tags	Q2UXQ3+tags	Q2UXQ3+tags Q2UXQ3+tags	2	932.94	1864.87	49.0764	2.73	41761.6
	High	[K].SGNVNDYEVVNPQK.[I]	1	1	Q2UXQ3+tags	Q2UXQ3+tags	Q2UXQ3+tags Q2UXQ3+tags	2	781.876	1562.75	49.0641	2.93	34713.3
	High	[R].AYmESmcDPKK.[S]	1	1	Q2UXQ3+tags	Q2UXQ3+tags	Q2UXQ3+tags Q2UXQ3+tags	3	464.526	1391.56	12.4311	2.24
	High	[R].AYmESmcDPKK.[S]	1	1	Q2UXQ3+tags	Q2UXQ3+tags	Q2UXQ3+tags Q2UXQ3+tags	2	696.286	1391.56	12.4081	2.4	332954777
	High	[K].McGVTLTNWESDKPIKK.[A]	1	1	Q2UXQ3+tags	Q2UXQ3+tags	Q2UXQ3+tags Q2UXQ3+tags	3	669.674	2007.01	26.5035	2.84	455821074
	High	[K].mcGVTLTNWESDKPIKK.[A]	1	1	Q2UXQ3+tags	Q2UXQ3+tags	Q2UXQ3+tags Q2UXQ3+tags	3	675.005	2023	26.5196	3.65	2.74604e+06
	High	[R].AQDSYHFSDcSK.[N]	1	1	Q2UXQ3+tags	Q2UXQ3+tags	Q2UXQ3+tags Q2UXQ3+tags	3	482.198	1444.58	26.093	3.04	3.38618e+06
	High	[R].EILNSFGEWR.[Q]	1	1	Q2UXQ3+tags	Q2UXQ3+tags	Q2UXQ3+tags Q2UXQ3+tags	2	625.812	1250.62	49.4925	2.13	190224
	High	[K].ASHLVATSEQQHFDPR.[Y]	1	1	Q2UXQ3+tags	Q2UXQ3+tags	Q2UXQ3+tags Q2UXQ3+tags	4	456.476	1822.88	49.521	2.5	137271
	High	[R].GETYLIEPLKVPDSESHAVYK.[Y]	1	1	Q2UXQ3+tags	Q2UXQ3+tags	Q2UXQ3+tags Q2UXQ3+tags	3	792.411	2375.22	61.5777	3.46	137827
	High	[R].AQDSYHFSDcSK.[N]	1	1	Q2UXQ3+tags	Q2UXQ3+tags	Q2UXQ3+tags Q2UXQ3+tags	3	482.198	1444.58	50.2121	2.11	2.05405e+06
	High	[R].AVSDDmDDYcSGITSDcAR.[N]	1	1	Q2UXQ3+tags	Q2UXQ3+tags	Q2UXQ3+tags Q2UXQ3+tags	2	1077.41	2153.81	25.6571	3.26	1.22278e+10
	High	[R].IQNDADSTASISAcNGLK.[G]	1	1	Q2UXQ3+tags	Q2UXQ3+tags	Q2UXQ3+tags Q2UXQ3+tags	2	932.94	1864.87	25.6638	5.07
	High	[R].EILNSFGEWR.[Q]	1	1	Q2UXQ3+tags	Q2UXQ3+tags	Q2UXQ3+tags Q2UXQ3+tags	2	625.812	1250.62	49.9936	2.2	143914
	High	[R].EILNSFGEWR.[Q]	1	1	Q2UXQ3+tags	Q2UXQ3+tags	Q2UXQ3+tags Q2UXQ3+tags	2	625.812	1250.62	61.1348	2.66	219818
	High	[K].ITGLPVGAVK.[Q]	1	1	Q2UXQ3+tags	Q2UXQ3+tags	Q2UXQ3+tags Q2UXQ3+tags	2	477.803	954.598	49.9641	1.84	300721
	High	[K].ITGLPVGAVK.[Q]	1	1	Q2UXQ3+tags	Q2UXQ3+tags	Q2UXQ3+tags Q2UXQ3+tags	2	477.803	954.598	48.9573	1.41	362554
	High	[R].YIQLVIVADHAmVTK.[N]	1	1	Q2UXQ3+tags	Q2UXQ3+tags	Q2UXQ3+tags Q2UXQ3+tags	3	572.983	1716.94	49.9266	2.55	274863
	High	[K].VPDSESHAVYK.[Y]	1	1	Q2UXQ3+tags	Q2UXQ3+tags	Q2UXQ3+tags Q2UXQ3+tags	3	411.203	1231.59	25.9868	1.53	1.13133e+06
	High	[R].IQNDADSTASISAcNGLK.[G]	1	1	Q2UXQ3+tags	Q2UXQ3+tags	Q2UXQ3+tags Q2UXQ3+tags	2	932.938	1864.87	61.5293	3.58	83121.7
	High	[R].AQDSYHFSDcSK.[N]	1	1	Q2UXQ3+tags	Q2UXQ3+tags	Q2UXQ3+tags Q2UXQ3+tags	3	482.198	1444.58	49.7079	1.77	21645.9
	High	[R].YIQLVIVADHAmVTK.[N]	1	1	Q2UXQ3+tags	Q2UXQ3+tags	Q2UXQ3+tags Q2UXQ3+tags	3	572.984	1716.94	61.5529	1.75	100104
	High	[K].VPDSESHAVYK.[Y]	1	1	Q2UXQ3+tags	Q2UXQ3+tags	Q2UXQ3+tags Q2UXQ3+tags	2	616.301	1231.59	13.9404	3.16
	High	[K].SGNVNDYEVVNPQK.[I]	1	1	Q2UXQ3+tags	Q2UXQ3+tags	Q2UXQ3+tags Q2UXQ3+tags	2	781.877	1562.75	49.5696	3.38	78306
	High	[R].GETYLIEPLKVPDSESHAVYK.[Y]	1	1	Q2UXQ3+tags	Q2UXQ3+tags	Q2UXQ3+tags Q2UXQ3+tags	4	594.559	2375.21	49.7737	2.84
	High	[R].GETYLIEPLKVPDSESHAVYK.[Y]	1	1	Q2UXQ3+tags	Q2UXQ3+tags	Q2UXQ3+tags Q2UXQ3+tags	3	792.41	2375.22	61.076	3.06	141293
	High	[R].AVSDDmDDYcSGITSDcAR.[N]	1	1	Q2UXQ3+tags	Q2UXQ3+tags	Q2UXQ3+tags Q2UXQ3+tags	3	718.608	2153.81	26.656	2.4	2.58305e+07
	High	[K].SGNVNDYEVVNPQK.[I]	1	1	Q2UXQ3+tags	Q2UXQ3+tags	Q2UXQ3+tags Q2UXQ3+tags	2	781.877	1562.75	27.2337	3.94
	High	[R].EILNSFGEWR.[Q]	1	1	Q2UXQ3+tags	Q2UXQ3+tags	Q2UXQ3+tags Q2UXQ3+tags	2	625.812	1250.62	63.6504	2.42	1.99278e+06
	High	[R].IQNDADSTASISAcNGLK.[G]	1	1	Q2UXQ3+tags	Q2UXQ3+tags	Q2UXQ3+tags Q2UXQ3+tags	2	932.938	1864.87	64.083	2.91
	High	[R].AVSDDmDDYcSGITSDcAR.[N]	1	1	Q2UXQ3+tags	Q2UXQ3+tags	Q2UXQ3+tags Q2UXQ3+tags	2	1077.41	2153.81	27.3554	3.29
	High	[R].IQNDADSTASISAcNGLK.[G]	1	1	Q2UXQ3+tags	Q2UXQ3+tags	Q2UXQ3+tags Q2UXQ3+tags	2	932.94	1864.87	48.0638	3.74	45568.1
	High	[R].IQNDADSTASISAcNGLK.[G]	1	1	Q2UXQ3+tags	Q2UXQ3+tags	Q2UXQ3+tags Q2UXQ3+tags	2	932.939	1864.87	66.3116	2.64	77222
	High	[R].EILNSFGEWR.[Q]	1	1	Q2UXQ3+tags	Q2UXQ3+tags	Q2UXQ3+tags Q2UXQ3+tags	2	625.812	1250.62	66.3852	2.42	3.96082e+06
	High	[R].IQNDADSTASISAcNGLK.[G]	1	1	Q2UXQ3+tags	Q2UXQ3+tags	Q2UXQ3+tags Q2UXQ3+tags	3	622.296	1864.87	27.5533	3.99
	High	[R].IQNDADSTASISAcNGLK.[G]	1	1	Q2UXQ3+tags	Q2UXQ3+tags	Q2UXQ3+tags Q2UXQ3+tags	2	932.94	1864.87	67.3243	3.33	78983.2
	High	[R].IQNDADSTASISAcNGLK.[G]	1	1	Q2UXQ3+tags	Q2UXQ3+tags	Q2UXQ3+tags Q2UXQ3+tags	2	932.94	1864.87	27.5805	3.52
	High	[K].SGNVNDYEVVNPQK.[I]	1	1	Q2UXQ3+tags	Q2UXQ3+tags	Q2UXQ3+tags Q2UXQ3+tags	2	781.876	1562.75	48.0561	2.91	46788.8
	High	[R].EILNSFGEWR.[Q]	1	1	Q2UXQ3+tags	Q2UXQ3+tags	Q2UXQ3+tags Q2UXQ3+tags	2	625.812	1250.62	67.901	2.17	1.15857e+06
	High	[K].SGNVNDYEVVNPQK.[I]	1	1	Q2UXQ3+tags	Q2UXQ3+tags	Q2UXQ3+tags Q2UXQ3+tags	2	781.876	1562.75	27.7358	3.23	1.86281e+06
	High	[R].YIQLVIVADHAmVTK.[N]	1	1	Q2UXQ3+tags	Q2UXQ3+tags	Q2UXQ3+tags Q2UXQ3+tags	3	572.983	1716.93	63.5844	1.58	349308
	High	[R].IQNDADSTASISAcNGLK.[G]	1	1	Q2UXQ3+tags	Q2UXQ3+tags	Q2UXQ3+tags Q2UXQ3+tags	2	932.94	1864.87	63.5563	3.8	550334
	High	[R].YIQLVIVADHAmVTK.[N]	1	1	Q2UXQ3+tags	Q2UXQ3+tags	Q2UXQ3+tags Q2UXQ3+tags	3	572.983	1716.94	48.4096	2.2	374792
	High	[R].AVSDDmDDYcSGITSDcAR.[N]	1	1	Q2UXQ3+tags	Q2UXQ3+tags	Q2UXQ3+tags Q2UXQ3+tags	3	718.608	2153.81	27.1617	3.52	1.97107e+06
	High	[R].EILNSFGEWR.[Q]	1	1	Q2UXQ3+tags	Q2UXQ3+tags	Q2UXQ3+tags Q2UXQ3+tags	2	625.812	1250.62	62.6465	2.66	567215
	High	[K].ASHLVATSEQQHFDPR.[Y]	1	1	Q2UXQ3+tags	Q2UXQ3+tags	Q2UXQ3+tags Q2UXQ3+tags	4	456.476	1822.88	26.6888	2.55	3.31901e+07
	High	[K].SGNVNDYEVVNPQK.[I]	1	1	Q2UXQ3+tags	Q2UXQ3+tags	Q2UXQ3+tags Q2UXQ3+tags	2	781.876	1562.75	26.7278	3.99
	High	[R].AVSDDmDDYcSGITSDcAR.[N]	1	1	Q2UXQ3+tags	Q2UXQ3+tags	Q2UXQ3+tags Q2UXQ3+tags	2	1077.41	2153.81	26.7392	3.83	1.22377e+06
	High	[R].IQNDADSTASISAcNGLK.[G]	1	1	Q2UXQ3+tags	Q2UXQ3+tags	Q2UXQ3+tags Q2UXQ3+tags	2	932.94	1864.87	63.0522	2.99	821330
	High	[R].IQNDADSTASISAcNGLK.[G]	1	1	Q2UXQ3+tags	Q2UXQ3+tags	Q2UXQ3+tags Q2UXQ3+tags	2	932.938	1864.87	48.5676	2.88	83083
	High	[R].GETYLIEPLKVPDSESHAVYK.[Y]	1	1	Q2UXQ3+tags	Q2UXQ3+tags	Q2UXQ3+tags Q2UXQ3+tags	3	792.409	2375.21	48.8852	2.77	473264
	High	[K].SGNVNDYEVVNPQK.[I]	1	1	Q2UXQ3+tags	Q2UXQ3+tags	Q2UXQ3+tags Q2UXQ3+tags	2	781.877	1562.75	48.5611	3.18	255201
	High	[R].EILNSFGEWR.[Q]	1	1	Q2UXQ3+tags	Q2UXQ3+tags	Q2UXQ3+tags Q2UXQ3+tags	2	625.812	1250.62	48.4776	2.56	237053
	High	[R].EILNSFGEWR.[Q]	1	1	Q2UXQ3+tags	Q2UXQ3+tags	Q2UXQ3+tags Q2UXQ3+tags	2	625.812	1250.62	63.1479	2.57	1.99278e+06
	High	[K].ITGLPVGAVK.[Q]	1	1	Q2UXQ3+tags	Q2UXQ3+tags	Q2UXQ3+tags Q2UXQ3+tags	2	477.803	954.598	48.4535	1.27	672145
	High	[R].ITHDNAQLLTAVNLNGDTIGR.[A]	1	1	Q2UXQ3+tags	Q2UXQ3+tags	Q2UXQ3+tags Q2UXQ3+tags	3	746.061	2236.17	63.4335	2.81
	High	[R].AVSDDmDDYcSGITSDcAR.[N]	1	1	Q2UXQ3+tags	Q2UXQ3+tags	Q2UXQ3+tags Q2UXQ3+tags	3	718.608	2153.81	25.6361	3.04	2.72355e+09
	High	[R].IQNDADSTASISAcNGLK.[G]	1	1	Q2UXQ3+tags	Q2UXQ3+tags	Q2UXQ3+tags Q2UXQ3+tags	3	622.296	1864.87	25.6005	3.14
	High	[K].VPDSESHAVYK.[Y]	1	1	Q2UXQ3+tags	Q2UXQ3+tags	Q2UXQ3+tags Q2UXQ3+tags	2	616.301	1231.59	15.0905	2.77
	High	[K].VPDSESHAVYK.[Y]	1	1	Q2UXQ3+tags	Q2UXQ3+tags	Q2UXQ3+tags Q2UXQ3+tags	3	411.203	1231.6	15.09	2.45
	High	[R].IQNDADSTASISAcNGLK.[G]	1	1	Q2UXQ3+tags	Q2UXQ3+tags	Q2UXQ3+tags Q2UXQ3+tags	2	932.939	1864.87	24.6497	4.36	2.41754e+10
	High	[K].mcGVTLTNWESDKPIKK.[A]	1	1	Q2UXQ3+tags	Q2UXQ3+tags	Q2UXQ3+tags Q2UXQ3+tags	2	1012	2023	24.6498	3.78	2.47674e+07
	High	[K].ASHLVATSEQQHFDPR.[Y]	1	1	Q2UXQ3+tags	Q2UXQ3+tags	Q2UXQ3+tags Q2UXQ3+tags	2	911.946	1822.88	24.6552	3.33	1.4174e+06
	High	[K].ASHLVATSEQQHFDPR.[Y]	1	1	Q2UXQ3+tags	Q2UXQ3+tags	Q2UXQ3+tags Q2UXQ3+tags	4	456.476	1822.88	24.6608	2.01	8.6159e+06
	High	[R].GETYLIEPLKVPDSESHAVYK.[Y]	1	1	Q2UXQ3+tags	Q2UXQ3+tags	Q2UXQ3+tags Q2UXQ3+tags	3	792.41	2375.21	50.9191	2.07	795429
	High	[R].IQNDADSTASISAcNGLK.[G]	1	1	Q2UXQ3+tags	Q2UXQ3+tags	Q2UXQ3+tags Q2UXQ3+tags	2	932.941	1864.87	50.8622	2.84	175696
	High	[R].EILNSFGEWR.[Q]	1	1	Q2UXQ3+tags	Q2UXQ3+tags	Q2UXQ3+tags Q2UXQ3+tags	2	625.812	1250.62	60.1152	2.29	344306
	High	[K].mcGVTLTNWESDKPIKK.[A]	1	1	Q2UXQ3+tags	Q2UXQ3+tags	Q2UXQ3+tags Q2UXQ3+tags	3	675.004	2023	24.761	1.76	101753315
	High	[R].AVSDDmDDYcSGITSDcAR.[N]	1	1	Q2UXQ3+tags	Q2UXQ3+tags	Q2UXQ3+tags Q2UXQ3+tags	2	1077.41	2153.81	50.816	2.89	107573
	High	[K].mcGVTLTNWESDKPIKK.[A]	1	1	Q2UXQ3+tags	Q2UXQ3+tags	Q2UXQ3+tags Q2UXQ3+tags	2	1012	2023	24.7887	3.24	2.47674e+07
	High	[R].IQNDADSTASISAcNGLK.[G]	1	1	Q2UXQ3+tags	Q2UXQ3+tags	Q2UXQ3+tags Q2UXQ3+tags	2	932.941	1864.87	60.4895	2.61	14305.3
	High	[R].AQDSYHFSDcSK.[N]	1	1	Q2UXQ3+tags	Q2UXQ3+tags	Q2UXQ3+tags Q2UXQ3+tags	3	482.198	1444.58	24.5156	2.37	5.20682e+06
	High	[K].ITGLPVGAVK.[Q]	1	1	Q2UXQ3+tags	Q2UXQ3+tags	Q2UXQ3+tags Q2UXQ3+tags	2	477.803	954.598	60.0658	1.18	206853
	High	[R].YIQLVIVADHAmVTK.[N]	1	1	Q2UXQ3+tags	Q2UXQ3+tags	Q2UXQ3+tags Q2UXQ3+tags	3	572.983	1716.94	50.9382	1.83	276531
	High	[K].VPDSESHAVYK.[Y]	1	1	Q2UXQ3+tags	Q2UXQ3+tags	Q2UXQ3+tags Q2UXQ3+tags	2	616.302	1231.6	15.5968	2.97
	High	[R].AQDSYHFSDcSK.[N]	1	1	Q2UXQ3+tags	Q2UXQ3+tags	Q2UXQ3+tags Q2UXQ3+tags	3	482.199	1444.58	23.9704	3.14
	High	[R].YIQLVIVADHAmVTK.[N]	1	1	Q2UXQ3+tags	Q2UXQ3+tags	Q2UXQ3+tags Q2UXQ3+tags	3	572.984	1716.94	51.4436	2.17	54173
	High	[K].VPDSESHAVYK.[Y]	1	1	Q2UXQ3+tags	Q2UXQ3+tags	Q2UXQ3+tags Q2UXQ3+tags	3	411.203	1231.6	15.5967	2.29
	High	[R].GETYLIEPLKVPDSESHAVYK.[Y]	1	1	Q2UXQ3+tags	Q2UXQ3+tags	Q2UXQ3+tags Q2UXQ3+tags	4	594.559	2375.21	51.2901	2.2	733941
	High	[K].VPDSESHAVYK.[Y]	1	1	Q2UXQ3+tags	Q2UXQ3+tags	Q2UXQ3+tags Q2UXQ3+tags	3	411.203	1231.6	24.0761	2.47	1.60417e+06
	High	[K].mcGVTLTNWESDKPIKK.[A]	1	1	Q2UXQ3+tags	Q2UXQ3+tags	Q2UXQ3+tags Q2UXQ3+tags	3	675.004	2023	51.2417	2.52	125147
	High	[K].SGNVNDYEVVNPQK.[I]	1	1	Q2UXQ3+tags	Q2UXQ3+tags	Q2UXQ3+tags Q2UXQ3+tags	2	781.877	1562.75	51.0975	2.62	270763
	High	[K].ASHLVATSEQQHFDPR.[Y]	1	1	Q2UXQ3+tags	Q2UXQ3+tags	Q2UXQ3+tags Q2UXQ3+tags	3	608.3	1822.89	24.2395	2.6	4.10916e+07
	High	[K].SGNVNDYEVVNPQK.[I]	1	1	Q2UXQ3+tags	Q2UXQ3+tags	Q2UXQ3+tags Q2UXQ3+tags	2	781.878	1562.75	24.2511	3.54
	High	[K].mcGVTLTNWESDKPIKK.[A]	1	1	Q2UXQ3+tags	Q2UXQ3+tags	Q2UXQ3+tags Q2UXQ3+tags	4	506.505	2023	24.2578	2.02	8017055262
	High	[K].mcGVTLTNWESDKPIKK.[A]	1	1	Q2UXQ3+tags	Q2UXQ3+tags	Q2UXQ3+tags Q2UXQ3+tags	3	675.005	2023	24.258	4.12	6.86379e+09
	High	[K].ASHLVATSEQQHFDPR.[Y]	1	1	Q2UXQ3+tags	Q2UXQ3+tags	Q2UXQ3+tags Q2UXQ3+tags	3	608.3	1822.88	24.2587	4.14	4.10916e+07
	High	[R].EILNSFGEWR.[Q]	1	1	Q2UXQ3+tags	Q2UXQ3+tags	Q2UXQ3+tags Q2UXQ3+tags	2	625.812	1250.62	51.0053	2.44	168391
	High	[K].ITGLPVGAVK.[Q]	1	1	Q2UXQ3+tags	Q2UXQ3+tags	Q2UXQ3+tags Q2UXQ3+tags	2	477.803	954.598	50.9694	1.78	2.42076e+06
	High	[R].IQNDADSTASISAcNGLK.[G]	1	1	Q2UXQ3+tags	Q2UXQ3+tags	Q2UXQ3+tags Q2UXQ3+tags	2	932.938	1864.87	24.1349	3.95	7.83946e+06
	High	[R].GETYLIEPLKVPDSESHAVYK.[Y]	1	1	Q2UXQ3+tags	Q2UXQ3+tags	Q2UXQ3+tags Q2UXQ3+tags	3	792.41	2375.21	60.5738	3.31	325882
	High	[R].AYMESMcDPKK.[S]	1	1	Q2UXQ3+tags	Q2UXQ3+tags	Q2UXQ3+tags Q2UXQ3+tags	2	680.291	1359.57	18.4959	2.67	1.50468e+07
	High	[K].mcGVTLTNWESDKPIKK.[A]	1	1	Q2UXQ3+tags	Q2UXQ3+tags	Q2UXQ3+tags Q2UXQ3+tags	3	675.005	2023	25.2753	2.92	4.27872e+06
	High	[K].ASHLVATSEQQHFDPR.[Y]	1	1	Q2UXQ3+tags	Q2UXQ3+tags	Q2UXQ3+tags Q2UXQ3+tags	3	608.301	1822.89	25.2991	3.38	2.72887e+06
	High	[R].AVSDDmDDYcSGITSDcAR.[N]	1	1	Q2UXQ3+tags	Q2UXQ3+tags	Q2UXQ3+tags Q2UXQ3+tags	2	1077.41	2153.81	50.3119	3.23	913789
	High	[R].IQNDADSTASISAcNGLK.[G]	1	1	Q2UXQ3+tags	Q2UXQ3+tags	Q2UXQ3+tags Q2UXQ3+tags	3	622.295	1864.87	50.3108	2.32	1.22176e+06
	High	[R].YIQLVIVADHAmVTK.[N]	1	1	Q2UXQ3+tags	Q2UXQ3+tags	Q2UXQ3+tags Q2UXQ3+tags	3	572.983	1716.94	50.4323	2.14	2.56256e+06
	High	[R].AQDSYHFSDcSK.[N]	1	1	Q2UXQ3+tags	Q2UXQ3+tags	Q2UXQ3+tags Q2UXQ3+tags	3	482.198	1444.58	25.2603	2.11	2.52294e+06
	High	[R].GETYLIEPLK.[V]	1	1	Q2UXQ3+tags	Q2UXQ3+tags	Q2UXQ3+tags Q2UXQ3+tags	2	581.821	1162.63	50.3097	2.07	2.66047e+06
	High	[K].ITGLPVGAVK.[Q]	1	1	Q2UXQ3+tags	Q2UXQ3+tags	Q2UXQ3+tags Q2UXQ3+tags	2	477.803	954.598	50.4651	2.07	1.74769e+07
	High	[R].EILNSFGEWR.[Q]	1	1	Q2UXQ3+tags	Q2UXQ3+tags	Q2UXQ3+tags Q2UXQ3+tags	2	625.812	1250.62	50.4989	2.81	9.14875e+06
	High	[R].IQNDADSTASISAcNGLK.[G]	1	1	Q2UXQ3+tags	Q2UXQ3+tags	Q2UXQ3+tags Q2UXQ3+tags	2	932.94	1864.87	25.1571	4.6
	High	[R].IQNDADSTASISAcNGLK.[G]	1	1	Q2UXQ3+tags	Q2UXQ3+tags	Q2UXQ3+tags Q2UXQ3+tags	2	932.94	1864.87	25.424	3.78
	High	[R].ITHDNAQLLTAVNLNGDTIGR.[A]	1	1	Q2UXQ3+tags	Q2UXQ3+tags	Q2UXQ3+tags Q2UXQ3+tags	3	746.061	2236.17	50.3045	3.49	953146
	High	[R].GETYLIEPLKVPDSESHAVYK.[Y]	1	1	Q2UXQ3+tags	Q2UXQ3+tags	Q2UXQ3+tags Q2UXQ3+tags	4	594.559	2375.21	50.7849	2.9	1.48648e+06
	High	[R].IQNDADSTASISAcNGLK.[G]	1	1	Q2UXQ3+tags	Q2UXQ3+tags	Q2UXQ3+tags Q2UXQ3+tags	3	622.296	1864.87	25.0223	2.05	6.50188e+09
	High	[K].SGNVNDYEVVNPQK.[I]	1	1	Q2UXQ3+tags	Q2UXQ3+tags	Q2UXQ3+tags Q2UXQ3+tags	2	781.875	1562.74	60.7197	2.87	38220.3
	High	[K].SGNVNDYEVVNPQK.[I]	1	1	Q2UXQ3+tags	Q2UXQ3+tags	Q2UXQ3+tags Q2UXQ3+tags	2	781.877	1562.75	50.5864	2.25	7.65661e+06
	High	[K].ITGLPVGAVK.[Q]	1	1	Q2UXQ3+tags	Q2UXQ3+tags	Q2UXQ3+tags Q2UXQ3+tags	2	477.803	954.598	61.0744	1.54	303417
	High	[R].IQNDADSTASISAcNGLK.[G]	1	1	Q2UXQ3+tags	Q2UXQ3+tags	Q2UXQ3+tags Q2UXQ3+tags	2	932.94	1864.87	50.3529	2.6	2.04813e+06
	High	[K].ITGLPVGAVK.[Q]	1	1	Q2UXQ3+tags	Q2UXQ3+tags	Q2UXQ3+tags Q2UXQ3+tags	2	477.803	954.598	41.8318	1.36	1.67201e+06
	High	[R].GETYLIEPLK.[V]	1	1	Q2UXQ3+tags	Q2UXQ3+tags	Q2UXQ3+tags Q2UXQ3+tags	2	581.822	1162.64	36.1877	2.38	3.21982e+06
	High	[R].GETYLIEPLKVPDSESHAVYK.[Y]	1	1	Q2UXQ3+tags	Q2UXQ3+tags	Q2UXQ3+tags Q2UXQ3+tags	3	792.41	2375.22	58.5128	2.44	146668
	High	[R].AYmESmcDPK.[K]	1	1	Q2UXQ3+tags	Q2UXQ3+tags	Q2UXQ3+tags Q2UXQ3+tags	2	632.238	1263.47	15.3207	1.82	2.92976e+07
	High	[R].AVSDDmDDYcSGITSDcAR.[N]	1	1	Q2UXQ3+tags	Q2UXQ3+tags	Q2UXQ3+tags Q2UXQ3+tags	2	1077.41	2153.81	41.3117	1.54	145238
	High	[K].ITGLPVGAVK.[Q]	1	1	Q2UXQ3+tags	Q2UXQ3+tags	Q2UXQ3+tags Q2UXQ3+tags	2	477.803	954.598	38.2913	1.32
	High	[K].ASHLVATSEQQHFDPR.[Y]	1	1	Q2UXQ3+tags	Q2UXQ3+tags	Q2UXQ3+tags Q2UXQ3+tags	4	456.476	1822.88	61.1684	2.33	150500
	High	[R].ITHDNAQLLTAVNLNGDTIGR.[A]	1	1	Q2UXQ3+tags	Q2UXQ3+tags	Q2UXQ3+tags Q2UXQ3+tags	3	746.062	2236.17	62.3982	2.73	31394.6
	High	[K].ASHLVATSEQQHFDPR.[Y]	1	1	Q2UXQ3+tags	Q2UXQ3+tags	Q2UXQ3+tags Q2UXQ3+tags	4	456.476	1822.88	40.8219	2.76	765626
	High	[K].ITGLPVGAVK.[Q]	1	1	Q2UXQ3+tags	Q2UXQ3+tags	Q2UXQ3+tags Q2UXQ3+tags	2	477.803	954.598	39.2986	1.77	3.31773e+06
	High	[R].EILNSFGEWR.[Q]	1	1	Q2UXQ3+tags	Q2UXQ3+tags	Q2UXQ3+tags Q2UXQ3+tags	2	625.812	1250.62	60.6251	2.27	775676
	High	[R].YIQLVIVADHAmVTK.[N]	1	1	Q2UXQ3+tags	Q2UXQ3+tags	Q2UXQ3+tags Q2UXQ3+tags	3	572.983	1716.94	62.0701	2.02	118251
	High	[K].VPDSESHAVYK.[Y]	1	1	Q2UXQ3+tags	Q2UXQ3+tags	Q2UXQ3+tags Q2UXQ3+tags	2	616.302	1231.6	17.4922	2.62
	High	[K].ITGLPVGAVK.[Q]	1	1	Q2UXQ3+tags	Q2UXQ3+tags	Q2UXQ3+tags Q2UXQ3+tags	2	477.803	954.598	63.5939	1.66	1.53769e+06
	High	[K].SGNVNDYEVVNPQK.[I]	1	1	Q2UXQ3+tags	Q2UXQ3+tags	Q2UXQ3+tags Q2UXQ3+tags	2	781.877	1562.75	37.0526	3.35	770903
	High	[R].EILNSFGEWR.[Q]	1	1	Q2UXQ3+tags	Q2UXQ3+tags	Q2UXQ3+tags Q2UXQ3+tags	2	625.812	1250.62	58.5901	2.79	272881
	High	[K].ASHLVATSEQQHFDPR.[Y]	1	1	Q2UXQ3+tags	Q2UXQ3+tags	Q2UXQ3+tags Q2UXQ3+tags	3	608.3	1822.88	38.4696	2.68	543989
	High	[R].GETYLIEPLK.[V]	1	1	Q2UXQ3+tags	Q2UXQ3+tags	Q2UXQ3+tags Q2UXQ3+tags	2	581.822	1162.64	40.6052	2.65
	High	[K].ASHLVATSEQQHFDPR.[Y]	1	1	Q2UXQ3+tags	Q2UXQ3+tags	Q2UXQ3+tags Q2UXQ3+tags	4	456.476	1822.88	37.0613	2.5
	High	[R].YIQLVIVADHAmVTK.[N]	1	1	Q2UXQ3+tags	Q2UXQ3+tags	Q2UXQ3+tags Q2UXQ3+tags	3	572.984	1716.94	62.5759	2.13	113395
	High	[K].ITGLPVGAVK.[Q]	1	1	Q2UXQ3+tags	Q2UXQ3+tags	Q2UXQ3+tags Q2UXQ3+tags	2	477.803	954.598	54.5091	1.77	1.20491e+06
	High	[R].EILNSFGEWR.[Q]	1	1	Q2UXQ3+tags	Q2UXQ3+tags	Q2UXQ3+tags Q2UXQ3+tags	2	625.812	1250.62	41.8924	2.34	4.43014e+06
	High	[K].ASHLVATSEQQHFDPR.[Y]	1	1	Q2UXQ3+tags	Q2UXQ3+tags	Q2UXQ3+tags Q2UXQ3+tags	2	911.946	1822.88	45.7543	2.46	123280
	High	[K].ASHLVATSEQQHFDPR.[Y]	1	1	Q2UXQ3+tags	Q2UXQ3+tags	Q2UXQ3+tags Q2UXQ3+tags	4	456.476	1822.88	30.7565	2.47	3.79339e+06
	High	[K].ASHLVATSEQQHFDPR.[Y]	1	1	Q2UXQ3+tags	Q2UXQ3+tags	Q2UXQ3+tags Q2UXQ3+tags	4	456.476	1822.88	51.0511	2.91	221748
	High	[K].VPDSESHAVYK.[Y]	1	1	Q2UXQ3+tags	Q2UXQ3+tags	Q2UXQ3+tags Q2UXQ3+tags	3	411.203	1231.6	51.1267	2.31	41056.2
	High	[K].SGNVNDYEVVNPQK.[I]	1	1	Q2UXQ3+tags	Q2UXQ3+tags	Q2UXQ3+tags Q2UXQ3+tags	3	521.586	1562.74	24.0614	2.45	1476415158
	High	[R].GETYLIEPLK.[V]	1	1	Q2UXQ3+tags	Q2UXQ3+tags	Q2UXQ3+tags Q2UXQ3+tags	2	581.821	1162.64	31.4662	1.83	2.06687e+10
	High	[K].McGVTLTNWESDKPIK.[K]	1	1	Q2UXQ3+tags	Q2UXQ3+tags	Q2UXQ3+tags Q2UXQ3+tags	3	626.975	1878.91	31.7794	2.87	975272
	High	[R].AYmESMcDPK.[K]	1	1	Q2UXQ3+tags	Q2UXQ3+tags	Q2UXQ3+tags Q2UXQ3+tags	2	624.242	1247.48	18.5011	1.98	2.54835e+09
	High	[R].GETYLIEPLK.[V]	1	1	Q2UXQ3+tags	Q2UXQ3+tags	Q2UXQ3+tags Q2UXQ3+tags	2	581.822	1162.64	32.0361	2.37
	High	[K].ASHLVATSEQQHFDPR.[Y]	1	1	Q2UXQ3+tags	Q2UXQ3+tags	Q2UXQ3+tags Q2UXQ3+tags	4	456.476	1822.88	44.9378	2.53	1.00316e+06
	High	[R].AQDSYHFSDcSK.[N]	1	1	Q2UXQ3+tags	Q2UXQ3+tags	Q2UXQ3+tags Q2UXQ3+tags	3	482.198	1444.58	23.2257	2.12	2.85062e+06
	High	[K].ASHLVATSEQQHFDPR.[Y]	1	1	Q2UXQ3+tags	Q2UXQ3+tags	Q2UXQ3+tags Q2UXQ3+tags	4	456.476	1822.88	32.2825	2.34	762793
	High	[K].ASHLVATSEQQHFDPR.[Y]	1	1	Q2UXQ3+tags	Q2UXQ3+tags	Q2UXQ3+tags Q2UXQ3+tags	3	608.299	1822.88	44.9123	2.99	196287
	High	[K].ASHLVATSEQQHFDPR.[Y]	1	1	Q2UXQ3+tags	Q2UXQ3+tags	Q2UXQ3+tags Q2UXQ3+tags	4	456.476	1822.88	22.9281	2.28	1.15926e+07
	High	[K].ASHLVATSEQQHFDPR.[Y]	1	1	Q2UXQ3+tags	Q2UXQ3+tags	Q2UXQ3+tags Q2UXQ3+tags	4	456.477	1822.89	23.9553	2.7	3.40579e+07
	High	[R].EILNSFGEWRQR.[D]	1	1	Q2UXQ3+tags	Q2UXQ3+tags	Q2UXQ3+tags Q2UXQ3+tags	3	512.264	1534.78	30.2858	2.69	2.86238e+07
	High	[K].mcGVTLTNWESDKPIKK.[A]	1	1	Q2UXQ3+tags	Q2UXQ3+tags	Q2UXQ3+tags Q2UXQ3+tags	4	506.505	2023	25.2852	2.14
	High	[R].WNDLQGGSGLNDIFEAQK.[I]	1	1	Q2UXQ3+tags	Q2UXQ3+tags	Q2UXQ3+tags Q2UXQ3+tags	2	996.479	1991.95	47.8445	2.57
	High	[K].ITGLPVGAVK.[Q]	1	1	Q2UXQ3+tags	Q2UXQ3+tags	Q2UXQ3+tags Q2UXQ3+tags	2	477.803	954.598	28.0538	1.43	3.87249e+06
	High	[K].ITGLPVGAVK.[Q]	1	1	Q2UXQ3+tags	Q2UXQ3+tags	Q2UXQ3+tags Q2UXQ3+tags	2	477.803	954.598	27.5456	1.24
	High	[R].GETYLIEPLKVPDSESHAVYK.[Y]	1	1	Q2UXQ3+tags	Q2UXQ3+tags	Q2UXQ3+tags Q2UXQ3+tags	4	594.559	2375.21	48.2372	1.83
	High	[K].ASHLVATSEQQHFDPR.[Y]	1	1	Q2UXQ3+tags	Q2UXQ3+tags	Q2UXQ3+tags Q2UXQ3+tags	4	456.476	1822.88	47.4904	2.78	788125
	High	[K].ASHLVATSEQQHFDPR.[Y]	1	1	Q2UXQ3+tags	Q2UXQ3+tags	Q2UXQ3+tags Q2UXQ3+tags	2	911.946	1822.89	27.2036	3.05	907006
	High	[R].YIQLVIVADHAmVTK.[N]	1	1	Q2UXQ3+tags	Q2UXQ3+tags	Q2UXQ3+tags Q2UXQ3+tags	3	572.984	1716.94	47.3957	2.29	290295
	High	[K].ITGLPVGAVK.[Q]	1	1	Q2UXQ3+tags	Q2UXQ3+tags	Q2UXQ3+tags Q2UXQ3+tags	2	477.803	954.598	28.5577	1.37
	High	[K].ASHLVATSEQQHFDPR.[Y]	1	1	Q2UXQ3+tags	Q2UXQ3+tags	Q2UXQ3+tags Q2UXQ3+tags	3	608.3	1822.88	48.6629	3.16	567375
	High	[R].EILNSFGEWR.[Q]	1	1	Q2UXQ3+tags	Q2UXQ3+tags	Q2UXQ3+tags Q2UXQ3+tags	3	417.544	1250.62	28.861	1.87	833787
	High	[R].EILNSFGEWR.[Q]	1	1	Q2UXQ3+tags	Q2UXQ3+tags	Q2UXQ3+tags Q2UXQ3+tags	2	625.812	1250.62	48.9855	2.34
	High	[R].AQDSYHFSDcSK.[N]	1	1	Q2UXQ3+tags	Q2UXQ3+tags	Q2UXQ3+tags Q2UXQ3+tags	3	482.198	1444.58	49.1486	2.23
	High	[K].ASHLVATSEQQHFDPR.[Y]	1	1	Q2UXQ3+tags	Q2UXQ3+tags	Q2UXQ3+tags Q2UXQ3+tags	4	456.476	1822.88	26.1782	2.25	3.15806e+07
	High	[K].ITGLPVGAVK.[Q]	1	1	Q2UXQ3+tags	Q2UXQ3+tags	Q2UXQ3+tags Q2UXQ3+tags	2	477.803	954.599	26.0253	2.04	3.93223e+06
	High	[K].ITGLPVGAVK.[Q]	1	1	Q2UXQ3+tags	Q2UXQ3+tags	Q2UXQ3+tags Q2UXQ3+tags	2	477.803	954.598	29.5669	1.41	1.1943e+06
	High	[K].mcGVTLTNWESDKPIK.[K]	1	1	Q2UXQ3+tags	Q2UXQ3+tags	Q2UXQ3+tags Q2UXQ3+tags	2	947.955	1894.9	29.6627	2.99	324942
	High	[R].AQDSYHFSDcSK.[N]	1	1	Q2UXQ3+tags	Q2UXQ3+tags	Q2UXQ3+tags Q2UXQ3+tags	2	722.794	1444.58	22.7051	2.88	779238
	High	[R].AQDSYHFSDcSK.[N]	1	1	Q2UXQ3+tags	Q2UXQ3+tags	Q2UXQ3+tags Q2UXQ3+tags	3	482.198	1444.58	52.8646	1.86	126585
	High	[K].ASHLVATSEQQHFDPR.[Y]	1	1	Q2UXQ3+tags	Q2UXQ3+tags	Q2UXQ3+tags Q2UXQ3+tags	3	608.3	1822.89	19.5545	2.79	39715867972
	High	[R].AQDSYHFSDcSK.[N]	1	1	Q2UXQ3+tags	Q2UXQ3+tags	Q2UXQ3+tags Q2UXQ3+tags	3	482.198	1444.58	19.6873	2.15	5.37594e+07
	High	[K].ASHLVATSEQQHFDPR.[Y]	1	1	Q2UXQ3+tags	Q2UXQ3+tags	Q2UXQ3+tags Q2UXQ3+tags	2	911.946	1822.88	21.1977	3.9	1.24114e+07
	High	[R].AVSDDmDDYcSGITSDcAR.[N]	1	1	Q2UXQ3+tags	Q2UXQ3+tags	Q2UXQ3+tags Q2UXQ3+tags	2	1077.41	2153.81	55.1001	2.28	57454.6
	High	[K].mcGVTLTNWESDKPIKK.[A]	1	1	Q2UXQ3+tags	Q2UXQ3+tags	Q2UXQ3+tags Q2UXQ3+tags	4	506.505	2023	34.0362	2.31	1.06468e+06
	High	[K].ASHLVATSEQQHFDPR.[Y]	1	1	Q2UXQ3+tags	Q2UXQ3+tags	Q2UXQ3+tags Q2UXQ3+tags	4	456.476	1822.88	43.4145	2.67	801010
	High	[R].GETYLIEPLK.[V]	1	1	Q2UXQ3+tags	Q2UXQ3+tags	Q2UXQ3+tags Q2UXQ3+tags	2	581.821	1162.64	43.1191	1.92	114528
	High	[K].ASHLVATSEQQHFDPR.[Y]	1	1	Q2UXQ3+tags	Q2UXQ3+tags	Q2UXQ3+tags Q2UXQ3+tags	3	608.299	1822.88	20.6729	2.5
	High	[R].WNDLQGGSGLNDIFEAQK.[I]	1	1	Q2UXQ3+tags	Q2UXQ3+tags	Q2UXQ3+tags Q2UXQ3+tags	3	664.653	1991.94	42.8559	2.26
	High	[K].SGNVNDYEVVNPQK.[I]	1	1	Q2UXQ3+tags	Q2UXQ3+tags	Q2UXQ3+tags Q2UXQ3+tags	2	781.876	1562.74	54.635	2.81	251352
	High	[K].ASHLVATSEQQHFDPR.[Y]	1	1	Q2UXQ3+tags	Q2UXQ3+tags	Q2UXQ3+tags Q2UXQ3+tags	3	608.3	1822.88	21.692	2.34	1.94487e+06
	High	[R].AQDSYHFSDcSK.[N]	1	1	Q2UXQ3+tags	Q2UXQ3+tags	Q2UXQ3+tags Q2UXQ3+tags	3	482.198	1444.58	57.1208	1.79
	High	[R].GETYLIEPLKVPDSESHAVYK.[Y]	1	1	Q2UXQ3+tags	Q2UXQ3+tags	Q2UXQ3+tags Q2UXQ3+tags	4	594.559	2375.21	57.9542	2.25	458700
	High	[K].ITGLPVGAVK.[Q]	1	1	Q2UXQ3+tags	Q2UXQ3+tags	Q2UXQ3+tags Q2UXQ3+tags	2	477.803	954.599	35.7576	1.41	2.65663e+07
	High	[K].ITGLPVGAVK.[Q]	1	1	Q2UXQ3+tags	Q2UXQ3+tags	Q2UXQ3+tags Q2UXQ3+tags	2	477.803	954.598	33.2266	1.46	1.01021e+07
	High	[R].AYmESMcDPK.[K]	1	1	Q2UXQ3+tags	Q2UXQ3+tags	Q2UXQ3+tags Q2UXQ3+tags	2	624.241	1247.47	19.0069	2.33	2.98936e+07
	High	[R].GETYLIEPLK.[V]	1	1	Q2UXQ3+tags	Q2UXQ3+tags	Q2UXQ3+tags Q2UXQ3+tags	2	581.821	1162.63	58.0037	1.92	84214.4
	High	[R].AVSDDmDDYcSGITSDcAR.[N]	1	1	Q2UXQ3+tags	Q2UXQ3+tags	Q2UXQ3+tags Q2UXQ3+tags	2	1077.41	2153.8	47.9923	1.78
	High	[K].SGNVNDYEVVNPQK.[I]	1	1	Q2UXQ3+tags	Q2UXQ3+tags	Q2UXQ3+tags Q2UXQ3+tags	2	781.876	1562.74	58.1697	1.56
	High	[R].YIQLVIVADHAmVTK.[N]	1	1	Q2UXQ3+tags	Q2UXQ3+tags	Q2UXQ3+tags Q2UXQ3+tags	3	572.984	1716.94	63.0786	2.39	372947
	High	[R].IQNDADSTASISAcNGLK.[G]	1	1	Q2UXQ3+tags	Q2UXQ3+tags	Q2UXQ3+tags Q2UXQ3+tags	2	932.94	1864.87	46.5551	2.23
	High	[R].EILNSFGEWR.[Q]	1	1	Q2UXQ3+tags	Q2UXQ3+tags	Q2UXQ3+tags Q2UXQ3+tags	2	625.812	1250.62	67.3925	2.32	193289
	High	[K].ITGLPVGAVK.[Q]	1	1	Q2UXQ3+tags	Q2UXQ3+tags	Q2UXQ3+tags Q2UXQ3+tags	2	477.803	954.598	49.4619	1.15	381647
	High	[R].YIQLVIVADHAmVTK.[N]	1	1	Q2UXQ3+tags	Q2UXQ3+tags	Q2UXQ3+tags Q2UXQ3+tags	2	858.973	1716.94	39.9695	2.28	1.44363e+06
	High	[R].GETYLIEPLK.[V]	1	1	Q2UXQ3+tags	Q2UXQ3+tags	Q2UXQ3+tags Q2UXQ3+tags	2	581.821	1162.64	46.9222	2.11	114061
	High	[K].ITGLPVGAVK.[Q]	1	1	Q2UXQ3+tags	Q2UXQ3+tags	Q2UXQ3+tags Q2UXQ3+tags	2	477.803	954.598	47.4448	1.36	814180
	High	[R].AQDSYHFSDcSK.[N]	1	1	Q2UXQ3+tags	Q2UXQ3+tags	Q2UXQ3+tags Q2UXQ3+tags	3	482.198	1444.58	47.0821	1.56	188232
	High	[R].AVSDDmDDYcSGITSDcAR.[N]	1	1	Q2UXQ3+tags	Q2UXQ3+tags	Q2UXQ3+tags Q2UXQ3+tags	2	1077.41	2153.81	56.2203	2.22	65936.5
	High	[R].IQNDADSTASISAcNGLK.[G]	1	1	Q2UXQ3+tags	Q2UXQ3+tags	Q2UXQ3+tags Q2UXQ3+tags	2	932.94	1864.87	41.9528	2.32	1.45029e+06
	High	[R].GETYLIEPLKVPDSESHAVYK.[Y]	1	1	Q2UXQ3+tags	Q2UXQ3+tags	Q2UXQ3+tags Q2UXQ3+tags	4	594.559	2375.21	56.894	2.23	264490
	High	[R].IQNDADSTASISAcNGLK.[G]	1	1	Q2UXQ3+tags	Q2UXQ3+tags	Q2UXQ3+tags Q2UXQ3+tags	2	932.94	1864.87	56.4285	1.97	124403
	High	[R].GETYLIEPLKVPDSESHAVYK.[Y]	1	1	Q2UXQ3+tags	Q2UXQ3+tags	Q2UXQ3+tags Q2UXQ3+tags	3	792.41	2375.22	48.376	2.44	291435
	High	[R].GETYLIEPLK.[V]	1	1	Q2UXQ3+tags	Q2UXQ3+tags	Q2UXQ3+tags Q2UXQ3+tags	2	581.822	1162.64	56.4494	2.29	59062
	High	[R].YIQLVIVADHAmVTK.[N]	1	1	Q2UXQ3+tags	Q2UXQ3+tags	Q2UXQ3+tags Q2UXQ3+tags	3	572.984	1716.94	56.5042	2.08	293655
	High	[K].ASHLVATSEQQHFDPR.[Y]	1	1	Q2UXQ3+tags	Q2UXQ3+tags	Q2UXQ3+tags Q2UXQ3+tags	4	456.476	1822.88	46.9833	2.35	453857
	High	[R].ITHDNAQLLTAVNLNGDTIGR.[A]	1	1	Q2UXQ3+tags	Q2UXQ3+tags	Q2UXQ3+tags Q2UXQ3+tags	3	746.061	2236.17	48.6716	2.83	99205.8
	High	[R].EILNSFGEWR.[Q]	1	1	Q2UXQ3+tags	Q2UXQ3+tags	Q2UXQ3+tags Q2UXQ3+tags	2	625.812	1250.62	47.4636	2.41	1.85284e+06
	High	[K].ITGLPVGAVK.[Q]	1	1	Q2UXQ3+tags	Q2UXQ3+tags	Q2UXQ3+tags Q2UXQ3+tags	2	477.803	954.598	46.9391	1.86	328066
	High	[K].SGNVNDYEVVNPQK.[I]	1	1	Q2UXQ3+tags	Q2UXQ3+tags	Q2UXQ3+tags Q2UXQ3+tags	2	781.876	1562.74	41.4339	2.01	541442
	High	[R].GETYLIEPLK.[V]	1	1	Q2UXQ3+tags	Q2UXQ3+tags	Q2UXQ3+tags Q2UXQ3+tags	2	581.821	1162.64	45.8443	1.92	1.44916e+06
	High	[R].ITHDNAQLLTAVNLNGDTIGR.[A]	1	1	Q2UXQ3+tags	Q2UXQ3+tags	Q2UXQ3+tags Q2UXQ3+tags	3	746.061	2236.17	58.214	2.36
	High	[R].GETYLIEPLKVPDSESHAVYK.[Y]	1	1	Q2UXQ3+tags	Q2UXQ3+tags	Q2UXQ3+tags Q2UXQ3+tags	3	792.409	2375.21	51.4243	2.87
	High	[R].EILNSFGEWR.[Q]	1	1	Q2UXQ3+tags	Q2UXQ3+tags	Q2UXQ3+tags Q2UXQ3+tags	2	625.812	1250.62	43.917	2.18	3.57494e+06
	High	[R].AVSDDmDDYcSGITSDcAR.[N]	1	1	Q2UXQ3+tags	Q2UXQ3+tags	Q2UXQ3+tags Q2UXQ3+tags	2	1077.41	2153.81	45.2849	2.9	70037.4
	High	[R].IQNDADSTASISAcNGLK.[G]	1	1	Q2UXQ3+tags	Q2UXQ3+tags	Q2UXQ3+tags Q2UXQ3+tags	2	932.939	1864.87	43.9999	2.83	123844
	High	[R].AQDSYHFSDcSK.[N]	1	1	Q2UXQ3+tags	Q2UXQ3+tags	Q2UXQ3+tags Q2UXQ3+tags	3	482.198	1444.58	54.4377	1.76	91792.2
	High	[R].AQDSYHFSDcSK.[N]	1	1	Q2UXQ3+tags	Q2UXQ3+tags	Q2UXQ3+tags Q2UXQ3+tags	3	482.198	1444.58	59.4224	1.3
	High	[R].EILNSFGEWR.[Q]	1	1	Q2UXQ3+tags	Q2UXQ3+tags	Q2UXQ3+tags Q2UXQ3+tags	2	625.812	1250.62	44.9375	2.34	419430
	High	[R].EILNSFGEWR.[Q]	1	1	Q2UXQ3+tags	Q2UXQ3+tags	Q2UXQ3+tags Q2UXQ3+tags	2	625.812	1250.62	59.0994	2.54	364228
	High	[K].ITGLPVGAVK.[Q]	1	1	Q2UXQ3+tags	Q2UXQ3+tags	Q2UXQ3+tags Q2UXQ3+tags	2	477.803	954.598	54.0012	1.55
	High	[R].GETYLIEPLKVPDSESHAVYK.[Y]	1	1	Q2UXQ3+tags	Q2UXQ3+tags	Q2UXQ3+tags Q2UXQ3+tags	3	792.41	2375.22	52.4356	2.74	76463.6
	High	[R].IQNDADSTASISAcNGLK.[G]	1	1	Q2UXQ3+tags	Q2UXQ3+tags	Q2UXQ3+tags Q2UXQ3+tags	2	932.941	1864.87	53.9001	3.68
	High	[R].WNDLQGGSGLNDIFEAQK.[I]	1	1	Q2UXQ3+tags	Q2UXQ3+tags	Q2UXQ3+tags Q2UXQ3+tags	2	996.476	1991.95	59.0119	2.18	37947.9
	High	[K].ITGLPVGAVK.[Q]	1	1	Q2UXQ3+tags	Q2UXQ3+tags	Q2UXQ3+tags Q2UXQ3+tags	2	477.803	954.598	52.9864	1.58	120802
	High	[R].AVSDDmDDYcSGITSDcAR.[N]	1	1	Q2UXQ3+tags	Q2UXQ3+tags	Q2UXQ3+tags Q2UXQ3+tags	2	1077.41	2153.8	51.3931	2.46	126490
	High	[K].SGNVNDYEVVNPQK.[I]	1	1	Q2UXQ3+tags	Q2UXQ3+tags	Q2UXQ3+tags Q2UXQ3+tags	2	781.876	1562.75	59.6945	2.77	72362
	High	[R].ITHDNAQLLTAVNLNGDTIGR.[A]	1	1	Q2UXQ3+tags	Q2UXQ3+tags	Q2UXQ3+tags Q2UXQ3+tags	3	746.062	2236.17	51.3808	2.4
	High	[K].SGNVNDYEVVNPQK.[I]	1	1	Q2UXQ3+tags	Q2UXQ3+tags	Q2UXQ3+tags Q2UXQ3+tags	2	781.877	1562.75	40.3699	2.65	457395
	High	[K].SGNVNDYEVVNPQK.[I]	1	1	Q2UXQ3+tags	Q2UXQ3+tags	Q2UXQ3+tags Q2UXQ3+tags	2	781.877	1562.75	43.0217	2.66
	High	[R].ITHDNAQLLTAVNLNGDTIGR.[A]	1	1	Q2UXQ3+tags	Q2UXQ3+tags	Q2UXQ3+tags Q2UXQ3+tags	3	746.061	2236.17	52.9325	3.35	83760.6
	High	[K].ASHLVATSEQQHFDPR.[Y]	1	1	Q2UXQ3+tags	Q2UXQ3+tags	Q2UXQ3+tags Q2UXQ3+tags	4	456.476	1822.88	60.663	2.18	99374.2
	High	[R].YIQLVIVADHAmVTK.[N]	1	1	Q2UXQ3+tags	Q2UXQ3+tags	Q2UXQ3+tags Q2UXQ3+tags	3	572.983	1716.94	41.3353	2.31	1.45022e+06
	High	[R].WNDLQGGSGLNDIFEAQK.[I]	1	1	Q2UXQ3+tags	Q2UXQ3+tags	Q2UXQ3+tags Q2UXQ3+tags	2	996.478	1991.95	43.2881	2.44	115778
	High	[R].GETYLIEPLKVPDSESHAVYK.[Y]	1	1	Q2UXQ3+tags	Q2UXQ3+tags	Q2UXQ3+tags Q2UXQ3+tags	4	594.559	2375.21	45.6981	2.6	1.79576e+06
	High	[R].GETYLIEPLK.[V]	1	1	Q2UXQ3+tags	Q2UXQ3+tags	Q2UXQ3+tags Q2UXQ3+tags	2	581.822	1162.64	50.8138	2.51	451090
	High	[R].GETYLIEPLKVPDSESHAVYK.[Y]	1	1	Q2UXQ3+tags	Q2UXQ3+tags	Q2UXQ3+tags Q2UXQ3+tags	3	792.41	2375.22	43.3286	2.35	596033
	High	[K].SGNVNDYEVVNPQK.[I]	1	1	Q2UXQ3+tags	Q2UXQ3+tags	Q2UXQ3+tags Q2UXQ3+tags	2	781.876	1562.74	43.5234	2.93
	High	[R].ITHDNAQLLTAVNLNGDTIGR.[A]	1	1	Q2UXQ3+tags	Q2UXQ3+tags	Q2UXQ3+tags Q2UXQ3+tags	3	746.061	2236.17	43.5324	2.99	39191.9
	High	[R].IQNDADSTASISAcNGLK.[G]	1	1	Q2UXQ3+tags	Q2UXQ3+tags	Q2UXQ3+tags Q2UXQ3+tags	3	622.296	1864.87	55.0966	3.94	87624.2
	High	[R].GETYLIEPLKVPDSESHAVYK.[Y]	1	1	Q2UXQ3+tags	Q2UXQ3+tags	Q2UXQ3+tags Q2UXQ3+tags	3	792.41	2375.21	45.3503	3.28	1.11762e+06
	High	[R].IQNDADSTASISAcNGLK.[G]	1	1	Q2UXQ3+tags	Q2UXQ3+tags	Q2UXQ3+tags Q2UXQ3+tags	2	932.941	1864.88	59.983	2.67	136124
	High	[R].GETYLIEPLK.[V]	1	1	Q2UXQ3+tags	Q2UXQ3+tags	Q2UXQ3+tags Q2UXQ3+tags	2	581.822	1162.64	43.794	2.12
	High	[K].ASHLVATSEQQHFDPR.[Y]	1	1	Q2UXQ3+tags	Q2UXQ3+tags	Q2UXQ3+tags Q2UXQ3+tags	4	456.476	1822.88	58.6447	2.21	267042
	High	[K].KKDEAPK.[M]	1	1	Q2UXQ3+tags	Q2UXQ3+tags	Q2UXQ3+tags Q2UXQ3+tags	2	408.235	815.462	4.2241	2.35
	High	[K].mcGVTLTNWESDKPIKK.[A]	1	1	Q2UXQ3+tags	Q2UXQ3+tags	Q2UXQ3+tags Q2UXQ3+tags	3	675.006	2023	25.9784	2.15	3.20109e+07
	High	[R].YIQLVIVADHAmVTK.[N]	1	1	Q2UXQ3+tags	Q2UXQ3+tags	Q2UXQ3+tags Q2UXQ3+tags	2	858.972	1716.94	33.5026	2.25	1.18096e+06
	High	[R].GETYLIEPLK.[V]	1	1	Q2UXQ3+tags	Q2UXQ3+tags	Q2UXQ3+tags Q2UXQ3+tags	2	581.822	1162.64	33.0527	2.4	9050080
	High	[R].GETYLIEPLKVPDSESHAVYK.[Y]	1	1	Q2UXQ3+tags	Q2UXQ3+tags	Q2UXQ3+tags Q2UXQ3+tags	3	792.41	2375.22	32.9045	2.25	3.84066e+07
	High	[K].ASHLVATSEQQHFDPR.[Y]	1	1	Q2UXQ3+tags	Q2UXQ3+tags	Q2UXQ3+tags Q2UXQ3+tags	4	456.476	1822.88	21.3959	2.11	2645600
	High	[R].GETYLIEPLKVPDSESHAVYK.[Y]	1	1	Q2UXQ3+tags	Q2UXQ3+tags	Q2UXQ3+tags Q2UXQ3+tags	4	594.559	2375.21	32.4502	3.26
	High	[R].ITHDNAQLLTAVNLNGDTIGR.[A]	1	1	Q2UXQ3+tags	Q2UXQ3+tags	Q2UXQ3+tags Q2UXQ3+tags	3	746.06	2236.17	32.1299	4.04	1.47846e+06
	High	[K].RAVSDDmDDYcSGITSDcAR.[N]	1	1	Q2UXQ3+tags	Q2UXQ3+tags	Q2UXQ3+tags Q2UXQ3+tags	3	770.643	2309.91	22.5653	3.29	1.7539e+06
	High	[R].AYMESMcDPK.[K]	1	1	Q2UXQ3+tags	Q2UXQ3+tags	Q2UXQ3+tags Q2UXQ3+tags	2	616.244	1231.48	22.262	1.64	1.14373e+09
	High	[K].VPDSESHAVYK.[Y]	1	1	Q2UXQ3+tags	Q2UXQ3+tags	Q2UXQ3+tags Q2UXQ3+tags	3	411.203	1231.59	33.6159	1.99	1.35314e+06
	High	[K].ASHLVATSEQQHFDPR.[Y]	1	1	Q2UXQ3+tags	Q2UXQ3+tags	Q2UXQ3+tags Q2UXQ3+tags	2	911.945	1822.88	33.7711	2.48	442692
	High	[R].GETYLIEPLKVPDSESHAVYK.[Y]	1	1	Q2UXQ3+tags	Q2UXQ3+tags	Q2UXQ3+tags Q2UXQ3+tags	4	594.559	2375.21	34.7905	2.99	1.1844e+07
	High	[K].SGNVNDYEVVNPQK.[I]	1	1	Q2UXQ3+tags	Q2UXQ3+tags	Q2UXQ3+tags Q2UXQ3+tags	2	781.876	1562.74	34.7835	2.27	3.83059e+06
	High	[R].AQDSYHFSDcSK.[N]	1	1	Q2UXQ3+tags	Q2UXQ3+tags	Q2UXQ3+tags Q2UXQ3+tags	2	722.794	1444.58	19.5085	2.89	5.3472e+06
	High	[R].GETYLIEPLK.[V]	1	1	Q2UXQ3+tags	Q2UXQ3+tags	Q2UXQ3+tags Q2UXQ3+tags	2	581.821	1162.64	34.6379	1.58	235053
	High	[R].GETYLIEPLKVPDSESHAVYK.[Y]	1	1	Q2UXQ3+tags	Q2UXQ3+tags	Q2UXQ3+tags Q2UXQ3+tags	4	594.558	2375.21	33.9646	2.1	5.57981e+06
	High	[R].GETYLIEPLKVPDSESHAVYK.[Y]	1	1	Q2UXQ3+tags	Q2UXQ3+tags	Q2UXQ3+tags Q2UXQ3+tags	3	792.41	2375.21	33.9205	3.55	729822
	High	[K].VPDSESHAVYK.[Y]	1	1	Q2UXQ3+tags	Q2UXQ3+tags	Q2UXQ3+tags Q2UXQ3+tags	2	616.301	1231.6	18.9063	1.92	624796
	High	[K].mcGVTLTNWESDKPIKK.[A]	1	1	Q2UXQ3+tags	Q2UXQ3+tags	Q2UXQ3+tags Q2UXQ3+tags	4	506.505	2023	24.774	1.85	6.53942e+07
	High	[K].SGNVNDYEVVNPQK.[I]	1	1	Q2UXQ3+tags	Q2UXQ3+tags	Q2UXQ3+tags Q2UXQ3+tags	2	781.876	1562.74	29.3631	2.46	2.04216e+06
	High	[K].SGNVNDYEVVNPQK.[I]	1	1	Q2UXQ3+tags	Q2UXQ3+tags	Q2UXQ3+tags Q2UXQ3+tags	2	781.876	1562.75	25.3147	3.16
	High	[K].ASHLVATSEQQHFDPR.[Y]	1	1	Q2UXQ3+tags	Q2UXQ3+tags	Q2UXQ3+tags Q2UXQ3+tags	4	456.476	1822.88	25.6704	2.27	5.09325e+06
	High	[R].AVSDDmDDYcSGITSDcAR.[N]	1	1	Q2UXQ3+tags	Q2UXQ3+tags	Q2UXQ3+tags Q2UXQ3+tags	3	718.608	2153.81	28.674	1.67
	High	[K].VPDSESHAVYK.[Y]	1	1	Q2UXQ3+tags	Q2UXQ3+tags	Q2UXQ3+tags Q2UXQ3+tags	3	411.204	1231.6	26.7843	2.52	600681
	High	[K].McGVTLTNWESDKPIKK.[A]	1	1	Q2UXQ3+tags	Q2UXQ3+tags	Q2UXQ3+tags Q2UXQ3+tags	3	669.674	2007.01	27.0327	3.09	1.1741e+06
	High	[K].ITGLPVGAVK.[Q]	1	1	Q2UXQ3+tags	Q2UXQ3+tags	Q2UXQ3+tags Q2UXQ3+tags	2	477.803	954.599	27.0393	2.06
	High	[K].SGNVNDYEVVNPQK.[I]	1	1	Q2UXQ3+tags	Q2UXQ3+tags	Q2UXQ3+tags Q2UXQ3+tags	3	521.586	1562.74	24.68	3.27	2.99924e+06
	High	[K].VPDSESHAVYK.[Y]	1	1	Q2UXQ3+tags	Q2UXQ3+tags	Q2UXQ3+tags Q2UXQ3+tags	3	411.203	1231.59	29.5237	1.81	958878
	High	[K].ASHLVATSEQQHFDPR.[Y]	1	1	Q2UXQ3+tags	Q2UXQ3+tags	Q2UXQ3+tags Q2UXQ3+tags	4	456.476	1822.88	23.4331	1.79	4.01097e+07
	High	[K].VPDSESHAVYK.[Y]	1	1	Q2UXQ3+tags	Q2UXQ3+tags	Q2UXQ3+tags Q2UXQ3+tags	3	411.203	1231.6	23.5075	2.14	939964
	High	[R].AQDSYHFSDcSK.[N]	1	1	Q2UXQ3+tags	Q2UXQ3+tags	Q2UXQ3+tags Q2UXQ3+tags	2	722.795	1444.58	24.05	3.14	1.35797e+06
	High	[K].ASHLVATSEQQHFDPR.[Y]	1	1	Q2UXQ3+tags	Q2UXQ3+tags	Q2UXQ3+tags Q2UXQ3+tags	4	456.476	1822.88	29.7414	2.28	4.48656e+06
	High	[K].mcGVTLTNWESDKPIKK.[A]	1	1	Q2UXQ3+tags	Q2UXQ3+tags	Q2UXQ3+tags Q2UXQ3+tags	2	1012	2023	24.2694	2.3	8.34047e+08
	High	[K].ASHLVATSEQQHFDPR.[Y]	1	1	Q2UXQ3+tags	Q2UXQ3+tags	Q2UXQ3+tags Q2UXQ3+tags	4	456.476	1822.88	20.8221	2.09	7.41869e+06
	High	[R].YIQLVIVADHAmVTK.[N]	1	1	Q2UXQ3+tags	Q2UXQ3+tags	Q2UXQ3+tags Q2UXQ3+tags	2	858.972	1716.94	36.6961	2.4	200654
	High	[R].AVSDDmDDYcSGITSDcAR.[N]	1	1	Q2UXQ3+tags	Q2UXQ3+tags	Q2UXQ3+tags Q2UXQ3+tags	2	1077.41	2153.81	36.916	2.53	632272
	High	[R].AYmESMcDPKK.[S]	1	1	Q2UXQ3+tags	Q2UXQ3+tags	Q2UXQ3+tags Q2UXQ3+tags	2	688.288	1375.57	15.8432	2.21	291957
	High	[R].AYmESmcDPK.[K]	1	1	Q2UXQ3+tags	Q2UXQ3+tags	Q2UXQ3+tags Q2UXQ3+tags	2	632.238	1263.47	15.8281	1.44
	High	[R].EILNSFGEWR.[Q]	1	1	Q2UXQ3+tags	Q2UXQ3+tags	Q2UXQ3+tags Q2UXQ3+tags	2	625.812	1250.62	37.69	2.49
	High	[R].AVSDDmDDYcSGITSDcAR.[N]	1	1	Q2UXQ3+tags	Q2UXQ3+tags	Q2UXQ3+tags Q2UXQ3+tags	2	1077.41	2153.81	38.0714	2.32	446639
	High	[K].ASHLVATSEQQHFDPR.[Y]	1	1	Q2UXQ3+tags	Q2UXQ3+tags	Q2UXQ3+tags Q2UXQ3+tags	4	456.476	1822.88	38.0797	1.94	1.30363e+06
	High	[R].EILNSFGEWR.[Q]	1	1	Q2UXQ3+tags	Q2UXQ3+tags	Q2UXQ3+tags Q2UXQ3+tags	2	625.812	1250.62	38.8622	2.62
	High	[K].ASHLVATSEQQHFDPR.[Y]	1	1	Q2UXQ3+tags	Q2UXQ3+tags	Q2UXQ3+tags Q2UXQ3+tags	2	911.945	1822.88	39.148	4.42	269173
	High	[K].KKDEAPK.[M]	1	1	Q2UXQ3+tags	Q2UXQ3+tags	Q2UXQ3+tags Q2UXQ3+tags	2	408.235	815.462	7.2551	2.56
	High	[R].AVSDDmDDYcSGITSDcAR.[N]	1	1	Q2UXQ3+tags	Q2UXQ3+tags	Q2UXQ3+tags Q2UXQ3+tags	2	1077.41	2153.81	39.7262	2.49	56892.3
	High	[R].AYmESmcDPK.[K]	1	1	Q2UXQ3+tags	Q2UXQ3+tags	Q2UXQ3+tags Q2UXQ3+tags	2	632.239	1263.47	14.8184	1.62
	High	[R].GETYLIEPLKVPDSESHAVYK.[Y]	1	1	Q2UXQ3+tags	Q2UXQ3+tags	Q2UXQ3+tags Q2UXQ3+tags	3	792.41	2375.22	35.6807	3.32	2.11759e+07
	High	[R].AYmESmcDPK.[K]	1	1	Q2UXQ3+tags	Q2UXQ3+tags	Q2UXQ3+tags Q2UXQ3+tags	2	632.238	1263.47	17.3434	1.63	2.40389e+06
	High	[R].AQDSYHFSDcSK.[N]	1	1	Q2UXQ3+tags	Q2UXQ3+tags	Q2UXQ3+tags Q2UXQ3+tags	2	722.794	1444.58	17.1581	2.53	1.89595e+06
	High	[R].YIQLVIVADHAmVTK.[N]	1	1	Q2UXQ3+tags	Q2UXQ3+tags	Q2UXQ3+tags Q2UXQ3+tags	2	858.971	1716.94	36.1941	2.19	732285
	High	[K].VPDSESHAVYK.[Y]	1	1	Q2UXQ3+tags	Q2UXQ3+tags	Q2UXQ3+tags Q2UXQ3+tags	2	616.301	1231.6	18.3414	2.37	425048
	High	[R].EILNSFGEWR.[Q]	1	1	Q2UXQ3+tags	Q2UXQ3+tags	Q2UXQ3+tags Q2UXQ3+tags	2	625.812	1250.62	35.6627	2.42
	High	[R].GETYLIEPLK.[V]	1	1	Q2UXQ3+tags	Q2UXQ3+tags	Q2UXQ3+tags Q2UXQ3+tags	2	581.821	1162.64	37.1991	1.77	267074
	High	[K].VPDSESHAVYK.[Y]	1	1	Q2UXQ3+tags	Q2UXQ3+tags	Q2UXQ3+tags Q2UXQ3+tags	3	411.203	1231.59	22.2429	2.42	1.37664e+06
	High	[K].McGVTLTNWESDKPIK.[K]	1	1	Q2UXQ3+tags	Q2UXQ3+tags	Q2UXQ3+tags Q2UXQ3+tags	3	626.977	1878.92	32.6348	2.98	746707
	High	[R].WNDLQGGSGLNDIFEAQK.[I]	1	1	Q2UXQ3+tags	Q2UXQ3+tags	Q2UXQ3+tags Q2UXQ3+tags	2	996.477	1991.95	37.5645	3	2.27903e+06
	High	[R].EILNSFGEWR.[Q]	1	1	Q2UXQ3+tags	Q2UXQ3+tags	Q2UXQ3+tags Q2UXQ3+tags	2	625.812	1250.62	61.6373	2.33	203073
	High	[K].SGNVNDYEVVNPQK.[I]	1	1	Q2UXQ3+tags	Q2UXQ3+tags	Q2UXQ3+tags Q2UXQ3+tags	2	781.877	1562.75	56.651	2.39	154538
	High	[K].McGVTLTNWESDKPIK.[K]	1	1	Q2UXQ3+tags	Q2UXQ3+tags	Q2UXQ3+tags Q2UXQ3+tags	3	626.973	1878.9	29.1744	3.21
	High	[R].EILNSFGEWR.[Q]	1	1	Q2UXQ3+tags	Q2UXQ3+tags	Q2UXQ3+tags Q2UXQ3+tags	2	625.813	1250.62	36.6733	2.4
	High	[R].YIQLVIVADHAmVTK.[N]	1	1	Q2UXQ3+tags	Q2UXQ3+tags	Q2UXQ3+tags Q2UXQ3+tags	3	572.983	1716.94	46.8898	1.18	568890
	High	[R].GETYLIEPLKVPDSESHAVYK.[Y]	1	1	Q2UXQ3+tags	Q2UXQ3+tags	Q2UXQ3+tags Q2UXQ3+tags	4	594.559	2375.21	59.128	1.67	147376
	High	[R].ITHDNAQLLTAVNLNGDTIGR.[A]	1	1	Q2UXQ3+tags	Q2UXQ3+tags	Q2UXQ3+tags Q2UXQ3+tags	3	746.061	2236.17	55.5887	1.96	29868.8
	High	[K].KKDEAPK.[M]	1	1	Q2UXQ3+tags	Q2UXQ3+tags	Q2UXQ3+tags Q2UXQ3+tags	2	408.235	815.462	5.2333	2.35	347090
	High	[R].ITHDNAQLLTAVNLNGDTIGR.[A]	1	1	Q2UXQ3+tags	Q2UXQ3+tags	Q2UXQ3+tags Q2UXQ3+tags	3	746.062	2236.17	50.8337	3.38	244692
	High	[K].ITGLPVGAVK.[Q]	1	1	Q2UXQ3+tags	Q2UXQ3+tags	Q2UXQ3+tags Q2UXQ3+tags	2	477.803	954.599	40.3123	1.45
	High	[R].GETYLIEPLKVPDSESHAVYK.[Y]	1	1	Q2UXQ3+tags	Q2UXQ3+tags	Q2UXQ3+tags Q2UXQ3+tags	3	792.41	2375.21	54.4641	3.05	317407
	High	[R].GETYLIEPLKVPDSESHAVYK.[Y]	1	1	Q2UXQ3+tags	Q2UXQ3+tags	Q2UXQ3+tags Q2UXQ3+tags	4	594.559	2375.21	54.3281	1.91	329478
	High	[K].ASHLVATSEQQHFDPR.[Y]	1	1	Q2UXQ3+tags	Q2UXQ3+tags	Q2UXQ3+tags Q2UXQ3+tags	4	456.476	1822.88	34.8276	2.41	3.74543e+06
	High	[R].IQNDADSTASISAcNGLK.[G]	1	1	Q2UXQ3+tags	Q2UXQ3+tags	Q2UXQ3+tags Q2UXQ3+tags	2	932.94	1864.87	64.6515	2.96	107052
	High	[K].ASHLVATSEQQHFDPR.[Y]	1	1	Q2UXQ3+tags	Q2UXQ3+tags	Q2UXQ3+tags Q2UXQ3+tags	4	456.476	1822.88	51.5601	1.74	706202
	High	[R].IQNDADSTASISAcNGLK.[G]	1	1	Q2UXQ3+tags	Q2UXQ3+tags	Q2UXQ3+tags Q2UXQ3+tags	2	932.938	1864.87	49.5818	1.87	106964
	High	[R].ITHDNAQLLTAVNLNGDTIGR.[A]	1	1	Q2UXQ3+tags	Q2UXQ3+tags	Q2UXQ3+tags Q2UXQ3+tags	3	746.062	2236.17	57.1811	2.01	54791
	High	[K].SGNVNDYEVVNPQK.[I]	1	1	Q2UXQ3+tags	Q2UXQ3+tags	Q2UXQ3+tags Q2UXQ3+tags	2	781.877	1562.75	42.5127	2.62	153041
	High	[K].KKDEAPK.[M]	1	1	Q2UXQ3+tags	Q2UXQ3+tags	Q2UXQ3+tags Q2UXQ3+tags	2	408.235	815.462	6.2446	2.59	146332
	High	[K].SGNVNDYEVVNPQK.[I]	1	1	Q2UXQ3+tags	Q2UXQ3+tags	Q2UXQ3+tags Q2UXQ3+tags	2	781.876	1562.75	59.1752	1.87	109276
	High	[R].GETYLIEPLK.[V]	1	1	Q2UXQ3+tags	Q2UXQ3+tags	Q2UXQ3+tags Q2UXQ3+tags	2	581.821	1162.64	51.3423	2.41	83689
	High	[R].EILNSFGEWR.[Q]	1	1	Q2UXQ3+tags	Q2UXQ3+tags	Q2UXQ3+tags Q2UXQ3+tags	2	625.813	1250.62	37.1831	2.15
	High	[R].WNDLQGGSGLNDIFEAQK.[I]	1	1	Q2UXQ3+tags	Q2UXQ3+tags	Q2UXQ3+tags Q2UXQ3+tags	3	664.654	1991.95	51.2296	2.38	58171.4
	High	[R].YIQLVIVADHAmVTK.[N]	1	1	Q2UXQ3+tags	Q2UXQ3+tags	Q2UXQ3+tags Q2UXQ3+tags	3	572.984	1716.94	47.9053	2.1	262439
	High	[R].AVSDDmDDYcSGITSDcAR.[N]	1	1	Q2UXQ3+tags	Q2UXQ3+tags	Q2UXQ3+tags Q2UXQ3+tags	2	1077.41	2153.8	39.1945	2.07	226088
	High	[K].ASHLVATSEQQHFDPR.[Y]	1	1	Q2UXQ3+tags	Q2UXQ3+tags	Q2UXQ3+tags Q2UXQ3+tags	3	608.3	1822.88	50.8238	2.53	523681
	High	[K].ITGLPVGAVK.[Q]	1	1	Q2UXQ3+tags	Q2UXQ3+tags	Q2UXQ3+tags Q2UXQ3+tags	2	477.803	954.598	63.0929	1.25	197457
	High	[R].AVSDDmDDYcSGITSDcAR.[N]	1	1	Q2UXQ3+tags	Q2UXQ3+tags	Q2UXQ3+tags Q2UXQ3+tags	3	718.606	2153.8	47.9648	1.09
	High	[R].ITHDNAQLLTAVNLNGDTIGR.[A]	1	1	Q2UXQ3+tags	Q2UXQ3+tags	Q2UXQ3+tags Q2UXQ3+tags	3	746.062	2236.17	40.1834	3.29	85950.6
	High	[R].GETYLIEPLKVPDSESHAVYK.[Y]	1	1	Q2UXQ3+tags	Q2UXQ3+tags	Q2UXQ3+tags Q2UXQ3+tags	3	792.41	2375.21	59.0212	2.51	78861.2
	High	[K].ITGLPVGAVK.[Q]	1	1	Q2UXQ3+tags	Q2UXQ3+tags	Q2UXQ3+tags Q2UXQ3+tags	2	477.803	954.598	68.1625	1.24	1.07713e+06
	High	[R].IQNDADSTASISAcNGLK.[G]	1	1	Q2UXQ3+tags	Q2UXQ3+tags	Q2UXQ3+tags Q2UXQ3+tags	3	622.295	1864.87	51.8466	2.24	132915
	High	[R].GETYLIEPLKVPDSESHAVYK.[Y]	1	1	Q2UXQ3+tags	Q2UXQ3+tags	Q2UXQ3+tags Q2UXQ3+tags	3	792.41	2375.22	49.9029	2.96	364507
	High	[R].GETYLIEPLKVPDSESHAVYK.[Y]	1	1	Q2UXQ3+tags	Q2UXQ3+tags	Q2UXQ3+tags Q2UXQ3+tags	3	792.41	2375.22	38.2044	2.31	978367
	High	[K].ITGLPVGAVK.[Q]	1	1	Q2UXQ3+tags	Q2UXQ3+tags	Q2UXQ3+tags Q2UXQ3+tags	2	477.803	954.598	30.5769	1.67	2.34988e+06
	High	[K].mcGVTLTNWESDKPIKK.[A]	1	1	Q2UXQ3+tags	Q2UXQ3+tags	Q2UXQ3+tags Q2UXQ3+tags	4	506.505	2023	53.5805	1.86	135031
	High	[K].ASHLVATSEQQHFDPR.[Y]	1	1	Q2UXQ3+tags	Q2UXQ3+tags	Q2UXQ3+tags Q2UXQ3+tags	2	911.945	1822.88	38.4535	3.49	196898
	High	[R].IQNDADSTASISAcNGLK.[G]	1	1	Q2UXQ3+tags	Q2UXQ3+tags	Q2UXQ3+tags Q2UXQ3+tags	2	932.94	1864.87	56.9338	2.52	40940.3
	High	[R].YIQLVIVADHAmVTK.[N]	1	1	Q2UXQ3+tags	Q2UXQ3+tags	Q2UXQ3+tags Q2UXQ3+tags	3	572.984	1716.94	44.8604	2	195696
	High	[K].McGVTLTNWESDKPIKK.[A]	1	1	Q2UXQ3+tags	Q2UXQ3+tags	Q2UXQ3+tags Q2UXQ3+tags	2	1004.01	2007.01	26.3108	1.8	103311108
	High	[R].GETYLIEPLKVPDSESHAVYK.[Y]	1	1	Q2UXQ3+tags	Q2UXQ3+tags	Q2UXQ3+tags Q2UXQ3+tags	4	594.559	2375.21	48.7399	2.46	193807
	High	[R].EILNSFGEWR.[Q]	1	1	Q2UXQ3+tags	Q2UXQ3+tags	Q2UXQ3+tags Q2UXQ3+tags	2	625.812	1250.62	65.8792	1.94	501985
	High	[K].SGNVNDYEVVNPQK.[I]	1	1	Q2UXQ3+tags	Q2UXQ3+tags	Q2UXQ3+tags Q2UXQ3+tags	2	781.876	1562.75	58.6733	2.72	114905
	High	[R].WNDLQGGSGLNDIFEAQK.[I]	1	1	Q2UXQ3+tags	Q2UXQ3+tags	Q2UXQ3+tags Q2UXQ3+tags	2	996.476	1991.94	50.3725	2.17	840750
	High	[R].EILNSFGEWR.[Q]	1	1	Q2UXQ3+tags	Q2UXQ3+tags	Q2UXQ3+tags Q2UXQ3+tags	2	625.812	1250.62	53.0217	2.51	116268
	High	[R].AYmESmcDPKK.[S]	1	1	Q2UXQ3+tags	Q2UXQ3+tags	Q2UXQ3+tags Q2UXQ3+tags	3	464.526	1391.56	17.6516	2.22	1.62092e+06
	High	[R].ITHDNAQLLTAVNLNGDTIGR.[A]	1	1	Q2UXQ3+tags	Q2UXQ3+tags	Q2UXQ3+tags Q2UXQ3+tags	3	746.061	2236.17	53.5049	2.02	78287.9
	High	[R].GETYLIEPLKVPDSESHAVYK.[Y]	1	1	Q2UXQ3+tags	Q2UXQ3+tags	Q2UXQ3+tags Q2UXQ3+tags	3	792.41	2375.22	52.9414	3.05	141422
	High	[R].AVSDDmDDYcSGITSDcAR.[N]	1	1	Q2UXQ3+tags	Q2UXQ3+tags	Q2UXQ3+tags Q2UXQ3+tags	2	1077.41	2153.81	58.2245	1.4
	High	[K].VPDSESHAVYK.[Y]	1	1	Q2UXQ3+tags	Q2UXQ3+tags	Q2UXQ3+tags Q2UXQ3+tags	3	411.203	1231.59	20.6542	2.66	1.83782e+06
	High	[R].GETYLIEPLK.[V]	1	1	Q2UXQ3+tags	Q2UXQ3+tags	Q2UXQ3+tags Q2UXQ3+tags	2	581.821	1162.64	55.9356	1.41	30825.1
	High	[K].ASHLVATSEQQHFDPR.[Y]	1	1	Q2UXQ3+tags	Q2UXQ3+tags	Q2UXQ3+tags Q2UXQ3+tags	4	456.476	1822.88	56.1043	1.69	127249
	High	[R].YIQLVIVADHAmVTK.[N]	1	1	Q2UXQ3+tags	Q2UXQ3+tags	Q2UXQ3+tags Q2UXQ3+tags	3	572.983	1716.94	60.0409	1.83	181933
	High	[R].AQDSYHFSDcSK.[N]	1	1	Q2UXQ3+tags	Q2UXQ3+tags	Q2UXQ3+tags Q2UXQ3+tags	3	482.197	1444.58	15.0824	2.26	973272
	High	[K].ASHLVATSEQQHFDPR.[Y]	1	1	Q2UXQ3+tags	Q2UXQ3+tags	Q2UXQ3+tags Q2UXQ3+tags	4	456.476	1822.88	19.0545	1.99
	High	[K].ASHLVATSEQQHFDPR.[Y]	1	1	Q2UXQ3+tags	Q2UXQ3+tags	Q2UXQ3+tags Q2UXQ3+tags	4	456.476	1822.88	57.1112	1.59	243412
	High	[K].ASHLVATSEQQHFDPR.[Y]	1	1	Q2UXQ3+tags	Q2UXQ3+tags	Q2UXQ3+tags Q2UXQ3+tags	3	608.298	1822.88	24.7674	2.42	9.6391e+06
	High	[R].AYmESmcDPKK.[S]	1	1	Q2UXQ3+tags	Q2UXQ3+tags	Q2UXQ3+tags Q2UXQ3+tags	3	464.526	1391.56	11.93	2.16	5.86594e+06
	High	[K].ASHLVATSEQQHFDPR.[Y]	1	1	Q2UXQ3+tags	Q2UXQ3+tags	Q2UXQ3+tags Q2UXQ3+tags	4	456.476	1822.88	62.1759	1.92	156015
	High	[R].YIQLVIVADHAmVTK.[N]	1	1	Q2UXQ3+tags	Q2UXQ3+tags	Q2UXQ3+tags Q2UXQ3+tags	3	572.984	1716.94	57.0064	1.79	226374
	High	[R].EILNSFGEWR.[Q]	1	1	Q2UXQ3+tags	Q2UXQ3+tags	Q2UXQ3+tags Q2UXQ3+tags	2	625.812	1250.62	51.5077	2.42	635638
	High	[R].YIQLVIVADHAmVTK.[N]	1	1	Q2UXQ3+tags	Q2UXQ3+tags	Q2UXQ3+tags Q2UXQ3+tags	3	572.983	1716.94	60.5442	1.91	19179.7
	High	[R].GETYLIEPLK.[V]	1	1	Q2UXQ3+tags	Q2UXQ3+tags	Q2UXQ3+tags Q2UXQ3+tags	2	581.822	1162.64	33.5659	2.35	1.28654e+06
	High	[R].AQDSYHFSDcSK.[N]	1	1	Q2UXQ3+tags	Q2UXQ3+tags	Q2UXQ3+tags Q2UXQ3+tags	2	722.794	1444.58	43.9722	2.17	58508.8
	High	[R].YIQLVIVADHAmVTK.[N]	1	1	Q2UXQ3+tags	Q2UXQ3+tags	Q2UXQ3+tags Q2UXQ3+tags	2	858.971	1716.94	43.7757	1.42	157756
	High	[K].ASHLVATSEQQHFDPR.[Y]	1	1	Q2UXQ3+tags	Q2UXQ3+tags	Q2UXQ3+tags Q2UXQ3+tags	3	608.3	1822.89	40.2955	2.16	1.46838e+06
	High	[K].ASHLVATSEQQHFDPR.[Y]	1	1	Q2UXQ3+tags	Q2UXQ3+tags	Q2UXQ3+tags Q2UXQ3+tags	3	608.299	1822.88	34.228	1.94	1.21042e+06
	High	[R].ITHDNAQLLTAVNLNGDTIGR.[A]	1	1	Q2UXQ3+tags	Q2UXQ3+tags	Q2UXQ3+tags Q2UXQ3+tags	3	746.062	2236.17	36.3841	2.32	1.34744e+06
	High	[K].ASHLVATSEQQHFDPR.[Y]	1	1	Q2UXQ3+tags	Q2UXQ3+tags	Q2UXQ3+tags Q2UXQ3+tags	2	911.945	1822.88	46.8672	1.94	100464
	High	[K].ASHLVATSEQQHFDPR.[Y]	1	1	Q2UXQ3+tags	Q2UXQ3+tags	Q2UXQ3+tags Q2UXQ3+tags	4	456.476	1822.88	29.2263	2.18	2.46428e+06
	High	[K].mcGVTLTNWESDKPIKK.[A]	1	1	Q2UXQ3+tags	Q2UXQ3+tags	Q2UXQ3+tags Q2UXQ3+tags	4	506.505	2023	28.9572	3.02	1.8345e+06
	High	[R].AQDSYHFSDcSK.[N]	1	1	Q2UXQ3+tags	Q2UXQ3+tags	Q2UXQ3+tags Q2UXQ3+tags	2	722.794	1444.58	42.6105	2.18	235381
	High	[R].AVSDDmDDYcSGITSDcAR.[N]	1	1	Q2UXQ3+tags	Q2UXQ3+tags	Q2UXQ3+tags Q2UXQ3+tags	2	1077.41	2153.81	40.7847	3.21	323497
	High	[K].ASHLVATSEQQHFDPR.[Y]	1	1	Q2UXQ3+tags	Q2UXQ3+tags	Q2UXQ3+tags Q2UXQ3+tags	2	911.947	1822.89	40.1816	3.32	2.33052e+06
	High	[R].GETYLIEPLK.[V]	1	1	Q2UXQ3+tags	Q2UXQ3+tags	Q2UXQ3+tags Q2UXQ3+tags	2	581.821	1162.64	39.1804	1.37	396003
	High	[K].mcGVTLTNWESDKPIKK.[A]	1	1	Q2UXQ3+tags	Q2UXQ3+tags	Q2UXQ3+tags Q2UXQ3+tags	4	506.505	2023	30.5349	2.43	1.04838e+06
	High	[R].AQDSYHFSDcSK.[N]	1	1	Q2UXQ3+tags	Q2UXQ3+tags	Q2UXQ3+tags Q2UXQ3+tags	3	482.198	1444.58	42.2663	1.81	255200
	High	[K].mcGVTLTNWESDKPIKK.[A]	1	1	Q2UXQ3+tags	Q2UXQ3+tags	Q2UXQ3+tags Q2UXQ3+tags	4	506.506	2023	32.9073	1.71	164851
	High	[R].IQNDADSTASISAcNGLK.[G]	1	1	Q2UXQ3+tags	Q2UXQ3+tags	Q2UXQ3+tags Q2UXQ3+tags	3	622.294	1864.87	40.9574	2.62	259618
	High	[K].ASHLVATSEQQHFDPR.[Y]	1	1	Q2UXQ3+tags	Q2UXQ3+tags	Q2UXQ3+tags Q2UXQ3+tags	4	456.476	1822.88	42.907	2.02	1.56383e+06
	High	[K].ASHLVATSEQQHFDPR.[Y]	1	1	Q2UXQ3+tags	Q2UXQ3+tags	Q2UXQ3+tags Q2UXQ3+tags	4	456.476	1822.88	45.9559	2.52	2.16953e+06
	High	[R].GETYLIEPLKVPDSESHAVYK.[Y]	1	1	Q2UXQ3+tags	Q2UXQ3+tags	Q2UXQ3+tags Q2UXQ3+tags	3	792.41	2375.21	45.852	2.39
	High	[K].ITGLPVGAVK.[Q]	1	1	Q2UXQ3+tags	Q2UXQ3+tags	Q2UXQ3+tags Q2UXQ3+tags	2	477.803	954.598	47.9507	1.78	220342
	High	[R].ITHDNAQLLTAVNLNGDTIGR.[A]	1	1	Q2UXQ3+tags	Q2UXQ3+tags	Q2UXQ3+tags Q2UXQ3+tags	3	746.061	2236.17	46.5909	2.12	126870
	High	[K].ASHLVATSEQQHFDPR.[Y]	1	1	Q2UXQ3+tags	Q2UXQ3+tags	Q2UXQ3+tags Q2UXQ3+tags	4	456.476	1822.88	36.0469	1.93	8.91695e+06
	High	[K].ASHLVATSEQQHFDPR.[Y]	1	1	Q2UXQ3+tags	Q2UXQ3+tags	Q2UXQ3+tags Q2UXQ3+tags	3	608.3	1822.89	37.2935	2.75
	High	[K].mcGVTLTNWESDKPIKK.[A]	1	1	Q2UXQ3+tags	Q2UXQ3+tags	Q2UXQ3+tags Q2UXQ3+tags	3	675.003	2023	46.9655	2.22	54351.8
	High	[K].ASHLVATSEQQHFDPR.[Y]	1	1	Q2UXQ3+tags	Q2UXQ3+tags	Q2UXQ3+tags Q2UXQ3+tags	4	456.476	1822.88	54.083	2.17
	High	[K].ASHLVATSEQQHFDPR.[Y]	1	1	Q2UXQ3+tags	Q2UXQ3+tags	Q2UXQ3+tags Q2UXQ3+tags	3	608.3	1822.88	50.3195	2.86	3.84045e+06
	High	[R].AVSDDmDDYcSGITSDcAR.[N]	1	1	Q2UXQ3+tags	Q2UXQ3+tags	Q2UXQ3+tags Q2UXQ3+tags	2	1077.41	2153.81	56.7919	1.14	23082.8
	High	[R].YIQLVIVADHAmVTK.[N]	1	1	Q2UXQ3+tags	Q2UXQ3+tags	Q2UXQ3+tags Q2UXQ3+tags	3	572.983	1716.94	51.9487	1.92	319489
	High	[R].GETYLIEPLK.[V]	1	1	Q2UXQ3+tags	Q2UXQ3+tags	Q2UXQ3+tags Q2UXQ3+tags	2	581.822	1162.64	39.6846	2.08	101136
	High	[R].IQNDADSTASISAcNGLK.[G]	1	1	Q2UXQ3+tags	Q2UXQ3+tags	Q2UXQ3+tags Q2UXQ3+tags	2	932.939	1864.87	32.4445	3.25	1.2944e+06
	High	[K].ASHLVATSEQQHFDPR.[Y]	1	1	Q2UXQ3+tags	Q2UXQ3+tags	Q2UXQ3+tags Q2UXQ3+tags	3	608.299	1822.88	35.2364	2.3	2.12033e+06
	High	[R].AVSDDmDDYcSGITSDcAR.[N]	1	1	Q2UXQ3+tags	Q2UXQ3+tags	Q2UXQ3+tags Q2UXQ3+tags	2	1077.41	2153.81	48.509	2.25	116301
	High	[K].ASHLVATSEQQHFDPR.[Y]	1	1	Q2UXQ3+tags	Q2UXQ3+tags	Q2UXQ3+tags Q2UXQ3+tags	4	456.476	1822.88	55.0956	2.15	642412
	High	[K].ITGLPVGAVK.[Q]	1	1	Q2UXQ3+tags	Q2UXQ3+tags	Q2UXQ3+tags Q2UXQ3+tags	2	477.803	954.598	57.0328	1.41	275741
	High	[R].AQDSYHFSDcSK.[N]	1	1	Q2UXQ3+tags	Q2UXQ3+tags	Q2UXQ3+tags Q2UXQ3+tags	2	722.794	1444.58	23.3194	2.41	626863
	High	[R].EILNSFGEWR.[Q]	1	1	Q2UXQ3+tags	Q2UXQ3+tags	Q2UXQ3+tags Q2UXQ3+tags	2	625.812	1250.62	65.1962	1.9	1.53902e+06
	High	[K].ASHLVATSEQQHFDPR.[Y]	1	1	Q2UXQ3+tags	Q2UXQ3+tags	Q2UXQ3+tags Q2UXQ3+tags	4	456.476	1822.88	28.2166	2.37	2.17278e+06
	High	[K].ASHLVATSEQQHFDPR.[Y]	1	1	Q2UXQ3+tags	Q2UXQ3+tags	Q2UXQ3+tags Q2UXQ3+tags	4	456.476	1822.88	41.8582	2.02	4.34064e+06
	High	[R].AYmESmcDPKK.[S]	1	1	Q2UXQ3+tags	Q2UXQ3+tags	Q2UXQ3+tags Q2UXQ3+tags	3	464.526	1391.56	12.9384	1.82
	High	[K].SGNVNDYEVVNPQK.[I]	1	1	Q2UXQ3+tags	Q2UXQ3+tags	Q2UXQ3+tags Q2UXQ3+tags	2	781.876	1562.75	23.2472	2.7	1.26549e+07
	High	[R].GETYLIEPLK.[V]	1	1	Q2UXQ3+tags	Q2UXQ3+tags	Q2UXQ3+tags Q2UXQ3+tags	2	581.821	1162.64	38.488	1.68	261559
	High	[R].WNDLQGGSGLNDIFEAQK.[I]	1	1	Q2UXQ3+tags	Q2UXQ3+tags	Q2UXQ3+tags Q2UXQ3+tags	2	996.477	1991.95	58.4964	1.38	85430.2
	High	[K].ITGLPVGAVK.[Q]	1	1	Q2UXQ3+tags	Q2UXQ3+tags	Q2UXQ3+tags Q2UXQ3+tags	2	477.804	954.6	26.5319	1.35	108068927728
	High	[K].ASHLVATSEQQHFDPR.[Y]	1	1	Q2UXQ3+tags	Q2UXQ3+tags	Q2UXQ3+tags Q2UXQ3+tags	4	456.476	1822.88	31.7784	1.48	5.10276e+06
	High	[R].AVSDDmDDYcSGITSDcAR.[N]	1	1	Q2UXQ3+tags	Q2UXQ3+tags	Q2UXQ3+tags Q2UXQ3+tags	2	1077.41	2153.81	44.1383	1.26	53803.6
	High	[K].ASHLVATSEQQHFDPR.[Y]	1	1	Q2UXQ3+tags	Q2UXQ3+tags	Q2UXQ3+tags Q2UXQ3+tags	4	456.476	1822.88	53.0663	1.67	277640
	High	[R].YIQLVIVADHAmVTK.[N]	1	1	Q2UXQ3+tags	Q2UXQ3+tags	Q2UXQ3+tags Q2UXQ3+tags	2	858.972	1716.94	50.5717	1.37	161597
	High	[R].ITHDNAQLLTAVNLNGDTIGR.[A]	1	1	Q2UXQ3+tags	Q2UXQ3+tags	Q2UXQ3+tags Q2UXQ3+tags	3	746.061	2236.17	40.7153	3.51	274101
	High	[K].ASHLVATSEQQHFDPR.[Y]	1	1	Q2UXQ3+tags	Q2UXQ3+tags	Q2UXQ3+tags Q2UXQ3+tags	4	456.476	1822.88	27.1948	2.59	1.01053e+06
	High	[K].ASHLVATSEQQHFDPR.[Y]	1	1	Q2UXQ3+tags	Q2UXQ3+tags	Q2UXQ3+tags Q2UXQ3+tags	4	456.476	1822.88	55.6027	2.12	548038
	High	[R].EILNSFGEWR.[Q]	1	1	Q2UXQ3+tags	Q2UXQ3+tags	Q2UXQ3+tags Q2UXQ3+tags	2	625.812	1250.62	55.0417	2.37	323988
	High	[R].AQDSYHFSDcSK.[N]	1	1	Q2UXQ3+tags	Q2UXQ3+tags	Q2UXQ3+tags Q2UXQ3+tags	2	722.793	1444.58	43.2556	1.39	31725.7
	High	[K].SGNVNDYEVVNPQK.[I]	1	1	Q2UXQ3+tags	Q2UXQ3+tags	Q2UXQ3+tags Q2UXQ3+tags	2	781.877	1562.75	47.552	2.46	102599
	High	[R].EILNSFGEWR.[Q]	1	1	Q2UXQ3+tags	Q2UXQ3+tags	Q2UXQ3+tags Q2UXQ3+tags	3	417.543	1250.61	35.8445	2.74	2.04345e+07
	High	[R].GETYLIEPLK.[V]	1	1	Q2UXQ3+tags	Q2UXQ3+tags	Q2UXQ3+tags Q2UXQ3+tags	2	581.821	1162.64	59.9029	1.81
	High	[K].KKDEAPK.[M]	1	1	Q2UXQ3+tags	Q2UXQ3+tags	Q2UXQ3+tags Q2UXQ3+tags	2	408.235	815.462	6.7478	2.7	1.06942e+06
	High	[R].YIQLVIVADHAmVTK.[N]	1	1	Q2UXQ3+tags	Q2UXQ3+tags	Q2UXQ3+tags Q2UXQ3+tags	2	858.971	1716.94	47.9064	1.91	64434.4
	High	[K].ASHLVATSEQQHFDPR.[Y]	1	1	Q2UXQ3+tags	Q2UXQ3+tags	Q2UXQ3+tags Q2UXQ3+tags	2	911.946	1822.88	26.6815	3.04	1.26052e+06
	High	[K].ASHLVATSEQQHFDPR.[Y]	1	1	Q2UXQ3+tags	Q2UXQ3+tags	Q2UXQ3+tags Q2UXQ3+tags	4	456.476	1822.88	48.5036	1.92	182770
	High	[K].ASHLVATSEQQHFDPR.[Y]	1	1	Q2UXQ3+tags	Q2UXQ3+tags	Q2UXQ3+tags Q2UXQ3+tags	3	608.299	1822.88	21.1834	2.53	8433096
	High	[R].YIQLVIVADHAmVTK.[N]	1	1	Q2UXQ3+tags	Q2UXQ3+tags	Q2UXQ3+tags Q2UXQ3+tags	3	572.983	1716.94	56.0017	1.84	172186
	High	[R].GETYLIEPLKVPDSESHAVYK.[Y]	1	1	Q2UXQ3+tags	Q2UXQ3+tags	Q2UXQ3+tags Q2UXQ3+tags	4	594.559	2375.21	50.2828	1.57	1.06104e+07
	High	[K].mcGVTLTNWESDKPIKK.[A]	1	1	Q2UXQ3+tags	Q2UXQ3+tags	Q2UXQ3+tags Q2UXQ3+tags	3	675.004	2023	50.7372	2.39	138683
	High	[R].AQDSYHFSDcSK.[N]	1	1	Q2UXQ3+tags	Q2UXQ3+tags	Q2UXQ3+tags Q2UXQ3+tags	3	482.198	1444.58	60.2544	1.83	88390.5
	High	[K].VPDSESHAVYK.[Y]	1	1	Q2UXQ3+tags	Q2UXQ3+tags	Q2UXQ3+tags Q2UXQ3+tags	3	411.202	1231.59	55.4233	1.99	128538
	High	[R].GETYLIEPLK.[V]	1	1	Q2UXQ3+tags	Q2UXQ3+tags	Q2UXQ3+tags Q2UXQ3+tags	2	581.821	1162.64	37.9794	1.98	62792.7
	High	[R].GETYLIEPLKVPDSESHAVYK.[Y]	1	1	Q2UXQ3+tags	Q2UXQ3+tags	Q2UXQ3+tags Q2UXQ3+tags	3	792.41	2375.22	42.8177	3.88	4.37833e+06
	High	[K].ASHLVATSEQQHFDPR.[Y]	1	1	Q2UXQ3+tags	Q2UXQ3+tags	Q2UXQ3+tags Q2UXQ3+tags	2	911.947	1822.89	32.7438	3.22	1.82211e+06
	High	[K].ASHLVATSEQQHFDPR.[Y]	1	1	Q2UXQ3+tags	Q2UXQ3+tags	Q2UXQ3+tags Q2UXQ3+tags	2	911.947	1822.89	36.4509	3.45	310599
	High	[R].AYmESmcDPK.[K]	1	1	Q2UXQ3+tags	Q2UXQ3+tags	Q2UXQ3+tags Q2UXQ3+tags	2	632.238	1263.47	14.3155	1.78	2.16301e+10
	High	[K].ASHLVATSEQQHFDPR.[Y]	1	1	Q2UXQ3+tags	Q2UXQ3+tags	Q2UXQ3+tags Q2UXQ3+tags	2	911.946	1822.89	46.3294	2.51	30498
	High	[R].YIQLVIVADHAmVTK.[N]	1	1	Q2UXQ3+tags	Q2UXQ3+tags	Q2UXQ3+tags Q2UXQ3+tags	2	858.971	1716.94	50.0603	2.53	41550.5
	High	[R].YIQLVIVADHAmVTK.[N]	1	1	Q2UXQ3+tags	Q2UXQ3+tags	Q2UXQ3+tags Q2UXQ3+tags	2	858.972	1716.94	59.6575	1.52	46114.2
	High	[R].WNDLQGGSGLNDIFEAQK.[I]	1	1	Q2UXQ3+tags	Q2UXQ3+tags	Q2UXQ3+tags Q2UXQ3+tags	3	664.656	1991.95	42.307	2.7	82966.7
	High	[R].GETYLIEPLK.[V]	1	1	Q2UXQ3+tags	Q2UXQ3+tags	Q2UXQ3+tags Q2UXQ3+tags	2	581.821	1162.63	47.4301	1.48
	High	[R].YIQLVIVADHAmVTK.[N]	1	1	Q2UXQ3+tags	Q2UXQ3+tags	Q2UXQ3+tags Q2UXQ3+tags	3	572.984	1716.94	61.0483	1.7	207397
	High	[K].VPDSESHAVYK.[Y]	1	1	Q2UXQ3+tags	Q2UXQ3+tags	Q2UXQ3+tags Q2UXQ3+tags	3	411.204	1231.6	41.3841	1.95	257254
	High	[R].TDTVSTPVSENELLQFLR.[A]	1	1	Q2UXQ3+tags	Q2UXQ3+tags	Q2UXQ3+tags Q2UXQ3+tags	2	1025.03	2049.05	46.5576	2.73	527065
	High	[K].mcGVTLTNWESDKPIKK.[A]	1	1	Q2UXQ3+tags	Q2UXQ3+tags	Q2UXQ3+tags Q2UXQ3+tags	4	506.505	2023	39.9054	1.91	208324
	High	[K].ITGLPVGAVK.[Q]	1	1	Q2UXQ3+tags	Q2UXQ3+tags	Q2UXQ3+tags Q2UXQ3+tags	2	477.803	954.598	60.5726	1.82	86704.1
	High	[R].GETYLIEPLKVPDSESHAVYK.[Y]	1	1	Q2UXQ3+tags	Q2UXQ3+tags	Q2UXQ3+tags Q2UXQ3+tags	4	594.559	2375.21	41.1332	2.54	2.01855e+06
	Medium	[K].SGNVNDYEVVNPQK.[I]	1	1	Q2UXQ3+tags	Q2UXQ3+tags	Q2UXQ3+tags Q2UXQ3+tags	2	781.877	1562.75	45.0367	2.71	311923
	Medium	[K].ASHLVATSEQQHFDPR.[Y]	1	1	Q2UXQ3+tags	Q2UXQ3+tags	Q2UXQ3+tags Q2UXQ3+tags	4	456.476	1822.88	42.3672	2.05	418543
	Medium	[K].mcGVTLTNWESDKPIKK.[A]	1	1	Q2UXQ3+tags	Q2UXQ3+tags	Q2UXQ3+tags Q2UXQ3+tags	3	675.005	2023	55.4217	1.84	37816.6
	Medium	[R].IQNDADSTASISAcNGLK.[G]	1	1	Q2UXQ3+tags	Q2UXQ3+tags	Q2UXQ3+tags Q2UXQ3+tags	3	622.294	1864.87	56.5055	2.42	58320.1
	Medium	[K].SGNVNDYEVVNPQK.[I]	1	1	Q2UXQ3+tags	Q2UXQ3+tags	Q2UXQ3+tags Q2UXQ3+tags	2	781.876	1562.75	60.2102	1.84	122031
	Medium	[R].AYmESmcDPK.[K]	1	1	Q2UXQ3+tags	Q2UXQ3+tags	Q2UXQ3+tags Q2UXQ3+tags	2	632.239	1263.47	19.8943	1.51	1.17615e+06
	Medium	[R].WNDLQGGSGLNDIFEAQK.[I]	1	1	Q2UXQ3+tags	Q2UXQ3+tags	Q2UXQ3+tags Q2UXQ3+tags	3	664.653	1991.95	38.637	1.97
	Medium	[K].ASHLVATSEQQHFDPR.[Y]	1	1	Q2UXQ3+tags	Q2UXQ3+tags	Q2UXQ3+tags Q2UXQ3+tags	4	456.476	1822.88	47.9968	2.34	452891
	Medium	[K].ASHLVATSEQQHFDPR.[Y]	1	1	Q2UXQ3+tags	Q2UXQ3+tags	Q2UXQ3+tags Q2UXQ3+tags	4	456.476	1822.88	58.137	2.4	475021
	Medium	[K].mcGVTLTNWESDKPIKK.[A]	1	1	Q2UXQ3+tags	Q2UXQ3+tags	Q2UXQ3+tags Q2UXQ3+tags	3	675.005	2023	43.8982	1.87	197146
	Medium	[R].GETYLIEPLK.[V]	1	1	Q2UXQ3+tags	Q2UXQ3+tags	Q2UXQ3+tags Q2UXQ3+tags	2	581.822	1162.64	36.6954	1.72	104565
	Medium	[R].AQDSYHFSDcSK.[N]	1	1	Q2UXQ3+tags	Q2UXQ3+tags	Q2UXQ3+tags Q2UXQ3+tags	3	482.198	1444.58	38.0395	1.77	398728
	Medium	[R].ITHDNAQLLTAVNLNGDTIGR.[A]	1	1	Q2UXQ3+tags	Q2UXQ3+tags	Q2UXQ3+tags Q2UXQ3+tags	3	746.062	2236.17	47.1009	2.68	125237
	Medium	[K].ASHLVATSEQQHFDPR.[Y]	1	1	Q2UXQ3+tags	Q2UXQ3+tags	Q2UXQ3+tags Q2UXQ3+tags	4	456.476	1822.88	50.5412	1.73	5.81222e+06
	Medium	[K].VPDSESHAVYK.[Y]	1	1	Q2UXQ3+tags	Q2UXQ3+tags	Q2UXQ3+tags Q2UXQ3+tags	3	411.203	1231.6	45.1526	1.94	81333.8
	Medium	[K].mcGVTLTNWESDKPIKK.[A]	1	1	Q2UXQ3+tags	Q2UXQ3+tags	Q2UXQ3+tags Q2UXQ3+tags	4	506.506	2023	26.032	2.36	4.12718e+07
	Medium	[R].GETYLIEPLKVPDSESHAVYK.[Y]	1	1	Q2UXQ3+tags	Q2UXQ3+tags	Q2UXQ3+tags Q2UXQ3+tags	3	792.409	2375.21	56.9994	2.02	98510
	Medium	[R].YIQLVIVADHAmVTK.[N]	1	1	Q2UXQ3+tags	Q2UXQ3+tags	Q2UXQ3+tags Q2UXQ3+tags	2	858.972	1716.94	45.8357	2.03	440165
	Medium	[R].EILNSFGEWR.[Q]	1	1	Q2UXQ3+tags	Q2UXQ3+tags	Q2UXQ3+tags Q2UXQ3+tags	2	625.813	1250.62	68.4084	2.08	33860.3
	Medium	[R].YIQLVIVADHAmVTK.[N]	1	1	Q2UXQ3+tags	Q2UXQ3+tags	Q2UXQ3+tags Q2UXQ3+tags	3	572.984	1716.94	68.2496	1.19	99000.8
	Medium	[R].EILNSFGEWR.[Q]	1	1	Q2UXQ3+tags	Q2UXQ3+tags	Q2UXQ3+tags Q2UXQ3+tags	2	625.812	1250.62	64.1525	2.16	2.90068e+06
	Medium	[K].KKDEAPK.[M]	1	1	Q2UXQ3+tags	Q2UXQ3+tags	Q2UXQ3+tags Q2UXQ3+tags	2	408.235	815.462	4.7314	2.46	4.73356e+06
	Medium	[R].GETYLIEPLKVPDSESHAVYK.[Y]	1	1	Q2UXQ3+tags	Q2UXQ3+tags	Q2UXQ3+tags Q2UXQ3+tags	3	792.41	2375.22	49.3965	2.45	270719
	Medium	[K].KKDEAPK.[M]	1	1	Q2UXQ3+tags	Q2UXQ3+tags	Q2UXQ3+tags Q2UXQ3+tags	2	408.235	815.462	5.739	2.64	1.82455e+06
	Medium	[K].ASHLVATSEQQHFDPR.[Y]	1	1	Q2UXQ3+tags	Q2UXQ3+tags	Q2UXQ3+tags Q2UXQ3+tags	2	911.949	1822.89	42.8582	3.72	382270
	Medium	[R].AVSDDmDDYcSGITSDcAR.[N]	1	1	Q2UXQ3+tags	Q2UXQ3+tags	Q2UXQ3+tags Q2UXQ3+tags	2	1077.41	2153.81	54.0448	1.92	33940.9
	Medium	[R].ITHDNAQLLTAVNLNGDTIGR.[A]	1	1	Q2UXQ3+tags	Q2UXQ3+tags	Q2UXQ3+tags Q2UXQ3+tags	3	746.062	2236.17	57.6909	3.13	48322.3
	Medium	[K].ASHLVATSEQQHFDPR.[Y]	1	1	Q2UXQ3+tags	Q2UXQ3+tags	Q2UXQ3+tags Q2UXQ3+tags	4	456.476	1822.88	49.011	1.62	237611
	Medium	[R].YIQLVIVADHAmVTK.[N]	1	1	Q2UXQ3+tags	Q2UXQ3+tags	Q2UXQ3+tags Q2UXQ3+tags	3	572.983	1716.94	43.001	1.82	191639
	Medium	[R].WNDLQGGSGLNDIFEAQK.[I]	1	1	Q2UXQ3+tags	Q2UXQ3+tags	Q2UXQ3+tags Q2UXQ3+tags	2	996.476	1991.95	48.8546	2.01	56853.8
	Medium	[K].ITGLPVGAVK.[Q]	1	1	Q2UXQ3+tags	Q2UXQ3+tags	Q2UXQ3+tags Q2UXQ3+tags	2	477.803	954.598	62.5903	1.48	132243
	Medium	[R].EILNSFGEWR.[Q]	1	1	Q2UXQ3+tags	Q2UXQ3+tags	Q2UXQ3+tags Q2UXQ3+tags	2	625.812	1250.62	45.9471	2.33	7.15864e+06
	Medium	[K].VPDSESHAVYK.[Y]	1	1	Q2UXQ3+tags	Q2UXQ3+tags	Q2UXQ3+tags Q2UXQ3+tags	3	411.204	1231.6	50.404	1.56	745739
	Medium	[R].GETYLIEPLKVPDSESHAVYK.[Y]	1	1	Q2UXQ3+tags	Q2UXQ3+tags	Q2UXQ3+tags Q2UXQ3+tags	3	792.412	2375.22	28.3197	3.96	1.71422e+06
	Medium	[R].AQDSYHFSDcSK.[N]	1	1	Q2UXQ3+tags	Q2UXQ3+tags	Q2UXQ3+tags Q2UXQ3+tags	3	482.198	1444.58	46.4409	2.09	71757.2
	Medium	[R].GETYLIEPLKVPDSESHAVYK.[Y]	1	1	Q2UXQ3+tags	Q2UXQ3+tags	Q2UXQ3+tags Q2UXQ3+tags	4	594.559	2375.21	54.8294	2.19	166711
	Medium	[K].mcGVTLTNWESDKPIKK.[A]	1	1	Q2UXQ3+tags	Q2UXQ3+tags	Q2UXQ3+tags Q2UXQ3+tags	3	675.004	2023	43.1373	2.47
	Medium	[R].IQNDADSTASISAcNGLK.[G]	1	1	Q2UXQ3+tags	Q2UXQ3+tags	Q2UXQ3+tags Q2UXQ3+tags	2	932.939	1864.87	32.8143	2.76	3.4019e+06
	Medium	[R].AQDSYHFSDcSK.[N]	1	1	Q2UXQ3+tags	Q2UXQ3+tags	Q2UXQ3+tags Q2UXQ3+tags	3	482.198	1444.58	57.6508	1.93	35830.2
	Medium	[R].AQDSYHFSDcSK.[N]	1	1	Q2UXQ3+tags	Q2UXQ3+tags	Q2UXQ3+tags Q2UXQ3+tags	3	482.198	1444.58	45.4094	1.06	469164
	Medium	[R].YIQLVIVADHAmVTK.[N]	1	1	Q2UXQ3+tags	Q2UXQ3+tags	Q2UXQ3+tags Q2UXQ3+tags	2	858.97	1716.93	38.8105	1.99	608612
	Medium	[R].YIQLVIVADHAmVTK.[N]	1	1	Q2UXQ3+tags	Q2UXQ3+tags	Q2UXQ3+tags Q2UXQ3+tags	2	858.972	1716.94	40.4735	2.07	151673
	Medium	[R].AVSDDmDDYcSGITSDcAR.[N]	1	1	Q2UXQ3+tags	Q2UXQ3+tags	Q2UXQ3+tags Q2UXQ3+tags	2	1077.41	2153.81	51.9102	1.62
	Medium	[R].IQNDADSTASISAcNGLK.[G]	1	1	Q2UXQ3+tags	Q2UXQ3+tags	Q2UXQ3+tags Q2UXQ3+tags	3	622.295	1864.87	54.5948	1.68	39655
	Medium	[R].YIQLVIVADHAmVTK.[N]	1	1	Q2UXQ3+tags	Q2UXQ3+tags	Q2UXQ3+tags Q2UXQ3+tags	2	858.971	1716.93	44.8168	2.42	1.01463e+06
	Medium	[R].ITHDNAQLLTAVNLNGDTIGR.[A]	1	1	Q2UXQ3+tags	Q2UXQ3+tags	Q2UXQ3+tags Q2UXQ3+tags	3	746.062	2236.17	54.0247	1.9	31213.9
	Medium	[K].VPDSESHAVYK.[Y]	1	1	Q2UXQ3+tags	Q2UXQ3+tags	Q2UXQ3+tags Q2UXQ3+tags	3	411.203	1231.59	34.2033	1.92	192883
	Medium	[R].YIQLVIVADHAmVTK.[N]	1	1	Q2UXQ3+tags	Q2UXQ3+tags	Q2UXQ3+tags Q2UXQ3+tags	2	858.972	1716.94	32.337	2.16	225906
	Medium	[R].GETYLIEPLKVPDSESHAVYK.[Y]	1	1	Q2UXQ3+tags	Q2UXQ3+tags	Q2UXQ3+tags Q2UXQ3+tags	4	594.561	2375.22	31.9444	1.76	9.98857e+08
	Medium	[K].VPDSESHAVYK.[Y]	1	1	Q2UXQ3+tags	Q2UXQ3+tags	Q2UXQ3+tags Q2UXQ3+tags	3	411.203	1231.59	39.754	2.11	234959
	Medium	[R].GETYLIEPLKVPDSESHAVYK.[Y]	1	1	Q2UXQ3+tags	Q2UXQ3+tags	Q2UXQ3+tags Q2UXQ3+tags	4	594.559	2375.21	61.4441	1.9	21358
	Medium	[R].GETYLIEPLKVPDSESHAVYK.[Y]	1	1	Q2UXQ3+tags	Q2UXQ3+tags	Q2UXQ3+tags Q2UXQ3+tags	3	792.41	2375.22	47.8698	2.76	304096
	Medium	[K].ASHLVATSEQQHFDPR.[Y]	1	1	Q2UXQ3+tags	Q2UXQ3+tags	Q2UXQ3+tags Q2UXQ3+tags	2	911.945	1822.88	30.4145	3.02	393197
	Medium	[K].ASHLVATSEQQHFDPR.[Y]	1	1	Q2UXQ3+tags	Q2UXQ3+tags	Q2UXQ3+tags Q2UXQ3+tags	3	608.299	1822.88	29.5153	3.02	1.30072e+06
	Medium	[K].VPDSESHAVYK.[Y]	1	1	Q2UXQ3+tags	Q2UXQ3+tags	Q2UXQ3+tags Q2UXQ3+tags	3	411.203	1231.59	35.2082	1.87	169318
	Medium	[R].GETYLIEPLK.[V]	1	1	Q2UXQ3+tags	Q2UXQ3+tags	Q2UXQ3+tags Q2UXQ3+tags	2	581.821	1162.64	57.4962	1.89	89280.7
	Medium	[R].ITHDNAQLLTAVNLNGDTIGR.[A]	1	1	Q2UXQ3+tags	Q2UXQ3+tags	Q2UXQ3+tags Q2UXQ3+tags	3	746.061	2236.17	49.2087	2.05	25530.7
	Medium	[R].YIQLVIVADHAmVTK.[N]	1	1	Q2UXQ3+tags	Q2UXQ3+tags	Q2UXQ3+tags Q2UXQ3+tags	3	572.983	1716.94	57.5143	1.53	451763
	Medium	[R].IQNDADSTASISAcNGLK.[G]	1	1	Q2UXQ3+tags	Q2UXQ3+tags	Q2UXQ3+tags Q2UXQ3+tags	3	622.294	1864.87	38.4885	2.76	412741
	Medium	[R].IQNDADSTASISAcNGLK.[G]	1	1	Q2UXQ3+tags	Q2UXQ3+tags	Q2UXQ3+tags Q2UXQ3+tags	2	932.939	1864.87	62.5472	1.76	821330
	Medium	[R].AVSDDmDDYcSGITSDcAR.[N]	1	1	Q2UXQ3+tags	Q2UXQ3+tags	Q2UXQ3+tags Q2UXQ3+tags	2	1077.41	2153.8	52.9625	1.67	78470.7
	Medium	[K].ASHLVATSEQQHFDPR.[Y]	1	1	Q2UXQ3+tags	Q2UXQ3+tags	Q2UXQ3+tags Q2UXQ3+tags	4	456.475	1822.88	16.6293	3.03	6.211e+06
	Medium	[R].GETYLIEPLKVPDSESHAVYK.[Y]	1	1	Q2UXQ3+tags	Q2UXQ3+tags	Q2UXQ3+tags Q2UXQ3+tags	4	594.559	2375.21	35.5533	2.09	4.42881e+07
	Medium	[R].GETYLIEPLK.[V]	1	1	Q2UXQ3+tags	Q2UXQ3+tags	Q2UXQ3+tags Q2UXQ3+tags	2	581.822	1162.64	44.3063	1.85	135825
	Medium	[R].AQDSYHFSDcSK.[N]	1	1	Q2UXQ3+tags	Q2UXQ3+tags	Q2UXQ3+tags Q2UXQ3+tags	3	482.198	1444.58	58.8612	1.47	86573.2
	Medium	[R].GETYLIEPLKVPDSESHAVYK.[Y]	1	1	Q2UXQ3+tags	Q2UXQ3+tags	Q2UXQ3+tags Q2UXQ3+tags	4	594.559	2375.21	55.8385	2.14	1.04295e+06
	Medium	[K].ASHLVATSEQQHFDPR.[Y]	1	1	Q2UXQ3+tags	Q2UXQ3+tags	Q2UXQ3+tags Q2UXQ3+tags	2	911.945	1822.88	30.9169	2.34	656505
	Medium	[R].WNDLQGGSGLNDIFEAQK.[I]	1	1	Q2UXQ3+tags	Q2UXQ3+tags	Q2UXQ3+tags Q2UXQ3+tags	2	996.477	1991.95	50.8818	2.81	95130.4
	Medium	[R].GETYLIEPLKVPDSESHAVYK.[Y]	1	1	Q2UXQ3+tags	Q2UXQ3+tags	Q2UXQ3+tags Q2UXQ3+tags	4	594.559	2375.21	57.3987	2.23	132476
	Medium	[R].GETYLIEPLKVPDSESHAVYK.[Y]	1	1	Q2UXQ3+tags	Q2UXQ3+tags	Q2UXQ3+tags Q2UXQ3+tags	4	594.559	2375.21	43.1524	2.05
	Medium	[K].SGNVNDYEVVNPQK.[I]	1	1	Q2UXQ3+tags	Q2UXQ3+tags	Q2UXQ3+tags Q2UXQ3+tags	2	781.875	1562.74	61.2352	1.87	46705.8
	Medium	[R].YIQLVIVADHAmVTK.[N]	1	1	Q2UXQ3+tags	Q2UXQ3+tags	Q2UXQ3+tags Q2UXQ3+tags	2	858.971	1716.93	48.9243	2.25	200045
	Medium	[K].ASHLVATSEQQHFDPR.[Y]	1	1	Q2UXQ3+tags	Q2UXQ3+tags	Q2UXQ3+tags Q2UXQ3+tags	4	456.476	1822.88	34.3037	2.03	848830
	Medium	[R].ITHDNAQLLTAVNLNGDTIGR.[A]	1	1	Q2UXQ3+tags	Q2UXQ3+tags	Q2UXQ3+tags Q2UXQ3+tags	3	746.061	2236.17	60.4394	2.6	14657.3
	Medium	[K].ASHLVATSEQQHFDPR.[Y]	1	1	Q2UXQ3+tags	Q2UXQ3+tags	Q2UXQ3+tags Q2UXQ3+tags	2	911.945	1822.88	40.6888	2.06	208646
	Medium	[R].ITHDNAQLLTAVNLNGDTIGR.[A]	1	1	Q2UXQ3+tags	Q2UXQ3+tags	Q2UXQ3+tags Q2UXQ3+tags	3	746.061	2236.17	62.9025	2	114484
	Medium	[R].IQNDADSTASISAcNGLK.[G]	1	1	Q2UXQ3+tags	Q2UXQ3+tags	Q2UXQ3+tags Q2UXQ3+tags	2	932.939	1864.87	54.4037	1.92	190016
	Medium	[K].ITGLPVGAVK.[Q]	1	1	Q2UXQ3+tags	Q2UXQ3+tags	Q2UXQ3+tags Q2UXQ3+tags	2	477.803	954.598	62.0868	1.79
	Medium	[K].VPDSESHAVYK.[Y]	1	1	Q2UXQ3+tags	Q2UXQ3+tags	Q2UXQ3+tags Q2UXQ3+tags	3	411.203	1231.6	46.3201	2.22	153458
	Medium	[R].AQDSYHFSDcSK.[N]	1	1	Q2UXQ3+tags	Q2UXQ3+tags	Q2UXQ3+tags Q2UXQ3+tags	2	722.794	1444.58	41.5188	1.66
	Medium	[R].AVSDDmDDYcSGITSDcAR.[N]	1	1	Q2UXQ3+tags	Q2UXQ3+tags	Q2UXQ3+tags Q2UXQ3+tags	2	1077.41	2153.81	44.7587	2.05	72104.1
	Medium	[K].VPDSESHAVYK.[Y]	1	1	Q2UXQ3+tags	Q2UXQ3+tags	Q2UXQ3+tags Q2UXQ3+tags	3	411.203	1231.6	48.8468	1.9	58347
	Medium	[R].EILNSFGEWR.[Q]	1	1	Q2UXQ3+tags	Q2UXQ3+tags	Q2UXQ3+tags Q2UXQ3+tags	2	625.812	1250.62	64.6583	2.33	1.43675e+06
	Medium	[R].IQNDADSTASISAcNGLK.[G]	1	1	Q2UXQ3+tags	Q2UXQ3+tags	Q2UXQ3+tags Q2UXQ3+tags	2	932.939	1864.87	58.4612	2.13	120541
	Medium	[K].VPDSESHAVYK.[Y]	1	1	Q2UXQ3+tags	Q2UXQ3+tags	Q2UXQ3+tags Q2UXQ3+tags	3	411.203	1231.59	25.2565	1.79	592784
	Medium	[K].ASHLVATSEQQHFDPR.[Y]	1	1	Q2UXQ3+tags	Q2UXQ3+tags	Q2UXQ3+tags Q2UXQ3+tags	2	911.947	1822.89	26.088	3.44	814012
	Medium	[R].AQDSYHFSDcSK.[N]	1	1	Q2UXQ3+tags	Q2UXQ3+tags	Q2UXQ3+tags Q2UXQ3+tags	3	482.198	1444.58	51.8357	2.06	76279.3
	Medium	[R].AQDSYHFSDcSK.[N]	1	1	Q2UXQ3+tags	Q2UXQ3+tags	Q2UXQ3+tags Q2UXQ3+tags	3	482.198	1444.58	42.9437	1.79	174700
	Medium	[R].AQDSYHFSDcSK.[N]	1	1	Q2UXQ3+tags	Q2UXQ3+tags	Q2UXQ3+tags Q2UXQ3+tags	3	482.199	1444.58	40.2049	1.53	99934.5
	Medium	[R].ITHDNAQLLTAVNLNGDTIGR.[A]	1	1	Q2UXQ3+tags	Q2UXQ3+tags	Q2UXQ3+tags Q2UXQ3+tags	3	746.068	2236.19	31.737	3.28
	Medium	[R].WNDLQGGSGLNDIFEAQK.[I]	1	1	Q2UXQ3+tags	Q2UXQ3+tags	Q2UXQ3+tags Q2UXQ3+tags	2	996.477	1991.95	53.9355	2.57	60956.1
	Medium	[K].VPDSESHAVYK.[Y]	1	1	Q2UXQ3+tags	Q2UXQ3+tags	Q2UXQ3+tags Q2UXQ3+tags	3	411.203	1231.6	39.1763	1.71	284953
	Medium	[R].YIQLVIVADHAmVTK.[N]	1	1	Q2UXQ3+tags	Q2UXQ3+tags	Q2UXQ3+tags Q2UXQ3+tags	2	858.971	1716.93	61.4706	1.38	72068.7
	Medium	[R].AVSDDmDDYcSGITSDcAR.[N]	1	1	Q2UXQ3+tags	Q2UXQ3+tags	Q2UXQ3+tags Q2UXQ3+tags	2	1077.41	2153.8	42.1986	2.79	118361
	Medium	[K].ASHLVATSEQQHFDPR.[Y]	1	1	Q2UXQ3+tags	Q2UXQ3+tags	Q2UXQ3+tags Q2UXQ3+tags	3	608.3	1822.88	43.8877	2.15	47153.7
	Medium	[K].ASHLVATSEQQHFDPR.[Y]	1	1	Q2UXQ3+tags	Q2UXQ3+tags	Q2UXQ3+tags Q2UXQ3+tags	3	608.3	1822.89	41.3158	1.59	1.50327e+06
	Medium	[R].GETYLIEPLK.[V]	1	1	Q2UXQ3+tags	Q2UXQ3+tags	Q2UXQ3+tags Q2UXQ3+tags	2	581.821	1162.64	54.9208	1.68
	Medium	[R].GETYLIEPLK.[V]	1	1	Q2UXQ3+tags	Q2UXQ3+tags	Q2UXQ3+tags Q2UXQ3+tags	2	581.821	1162.64	62.2887	1.42	38176.1
	Medium	[K].mcGVTLTNWESDKPIKK.[A]	1	1	Q2UXQ3+tags	Q2UXQ3+tags	Q2UXQ3+tags Q2UXQ3+tags	4	506.505	2023	36.2015	1.61	1.08941e+06
	Medium	[K].ASHLVATSEQQHFDPR.[Y]	1	1	Q2UXQ3+tags	Q2UXQ3+tags	Q2UXQ3+tags Q2UXQ3+tags	3	608.3	1822.89	26.4643	1.89	1.78228e+07
	Medium	[R].AQDSYHFSDcSK.[N]	1	1	Q2UXQ3+tags	Q2UXQ3+tags	Q2UXQ3+tags Q2UXQ3+tags	3	482.198	1444.58	60.8711	1.83	117842
	Medium	[R].GETYLIEPLK.[V]	1	1	Q2UXQ3+tags	Q2UXQ3+tags	Q2UXQ3+tags Q2UXQ3+tags	2	581.821	1162.64	51.8549	1.67	172434
	Medium	[R].GETYLIEPLKVPDSESHAVYK.[Y]	1	1	Q2UXQ3+tags	Q2UXQ3+tags	Q2UXQ3+tags Q2UXQ3+tags	4	594.559	2375.22	44.6854	2.18	642550
	Medium	[K].ASHLVATSEQQHFDPR.[Y]	1	1	Q2UXQ3+tags	Q2UXQ3+tags	Q2UXQ3+tags Q2UXQ3+tags	4	456.476	1822.88	56.6055	1.9	131260
	Medium	[R].GETYLIEPLKVPDSESHAVYK.[Y]	1	1	Q2UXQ3+tags	Q2UXQ3+tags	Q2UXQ3+tags Q2UXQ3+tags	3	792.41	2375.21	62.0879	1.96	114710
	Medium	[R].YIQLVIVADHAmVTK.[N]	1	1	Q2UXQ3+tags	Q2UXQ3+tags	Q2UXQ3+tags Q2UXQ3+tags	2	858.972	1716.94	45.3337	2.32	127275
	Medium	[K].mcGVTLTNWESDKPIKK.[A]	1	1	Q2UXQ3+tags	Q2UXQ3+tags	Q2UXQ3+tags Q2UXQ3+tags	3	675.004	2023	55.926	1.59	64564.3
	Medium	[R].AVSDDmDDYcSGITSDcAR.[N]	1	1	Q2UXQ3+tags	Q2UXQ3+tags	Q2UXQ3+tags Q2UXQ3+tags	2	1077.41	2153.8	46.3048	2	144490
	Medium	[R].YIQLVIVADHAmVTK.[N]	1	1	Q2UXQ3+tags	Q2UXQ3+tags	Q2UXQ3+tags Q2UXQ3+tags	3	572.984	1716.94	49.4254	2.53	239295
	Medium	[K].mcGVTLTNWESDKPIKK.[A]	1	1	Q2UXQ3+tags	Q2UXQ3+tags	Q2UXQ3+tags Q2UXQ3+tags	4	506.506	2023	52.5677	2.51	83486.8
	Medium	[K].ASHLVATSEQQHFDPR.[Y]	1	1	Q2UXQ3+tags	Q2UXQ3+tags	Q2UXQ3+tags Q2UXQ3+tags	3	608.3	1822.89	22.1973	1.25	4.19403e+06
	Medium	[R].EILNSFGEWR.[Q]	1	1	Q2UXQ3+tags	Q2UXQ3+tags	Q2UXQ3+tags Q2UXQ3+tags	2	625.813	1250.62	36.1642	2.49	63154863521
	Medium	[K].VPDSESHAVYK.[Y]	1	1	Q2UXQ3+tags	Q2UXQ3+tags	Q2UXQ3+tags Q2UXQ3+tags	3	411.203	1231.6	21.2177	2.34	984843
	Medium	[K].mcGVTLTNWESDKPIKK.[A]	1	1	Q2UXQ3+tags	Q2UXQ3+tags	Q2UXQ3+tags Q2UXQ3+tags	3	675.005	2023	58.0147	2.15	96013.3
	Medium	[K].KKDEAPK.[M]	1	1	Q2UXQ3+tags	Q2UXQ3+tags	Q2UXQ3+tags Q2UXQ3+tags	2	408.235	815.462	7.7615	2.53	39234.1
	Medium	[R].ITHDNAQLLTAVNLNGDTIGR.[A]	1	1	Q2UXQ3+tags	Q2UXQ3+tags	Q2UXQ3+tags Q2UXQ3+tags	3	746.06	2236.17	48.111	2.79	163434
	Medium	[R].GETYLIEPLK.[V]	1	1	Q2UXQ3+tags	Q2UXQ3+tags	Q2UXQ3+tags Q2UXQ3+tags	2	581.822	1162.64	42.1088	1.69	569110
	Medium	[R].WNDLQGGSGLNDIFEAQK.[I]	1	1	Q2UXQ3+tags	Q2UXQ3+tags	Q2UXQ3+tags Q2UXQ3+tags	2	996.478	1991.95	56.4762	2.44	52690.3
	Medium	[R].AYmESmcDPK.[K]	1	1	Q2UXQ3+tags	Q2UXQ3+tags	Q2UXQ3+tags Q2UXQ3+tags	2	632.238	1263.47	22.4021	1.37	6.24896e+06
	Medium	[K].ASHLVATSEQQHFDPR.[Y]	1	1	Q2UXQ3+tags	Q2UXQ3+tags	Q2UXQ3+tags Q2UXQ3+tags	4	456.476	1822.88	52.0624	2.37	338274
	Medium	[R].YIQLVIVADHAmVTK.[N]	1	1	Q2UXQ3+tags	Q2UXQ3+tags	Q2UXQ3+tags Q2UXQ3+tags	2	858.972	1716.94	54.782	1.63	58062
	Medium	[R].IQNDADSTASISAcNGLK.[G]	1	1	Q2UXQ3+tags	Q2UXQ3+tags	Q2UXQ3+tags Q2UXQ3+tags	2	932.94	1864.87	34.3888	2.97	996510
	Medium	[K].ASHLVATSEQQHFDPR.[Y]	1	1	Q2UXQ3+tags	Q2UXQ3+tags	Q2UXQ3+tags Q2UXQ3+tags	3	608.3	1822.89	42.3243	2.72	451469
	Medium	[R].WNDLQGGSGLNDIFEAQK.[I]	1	1	Q2UXQ3+tags	Q2UXQ3+tags	Q2UXQ3+tags Q2UXQ3+tags	2	996.477	1991.95	54.4394	2.16
	Medium	[K].ITGLPVGAVK.[Q]	1	1	Q2UXQ3+tags	Q2UXQ3+tags	Q2UXQ3+tags Q2UXQ3+tags	2	477.803	954.598	56.0205	1.38	190931
	Medium	[K].ASHLVATSEQQHFDPR.[Y]	1	1	Q2UXQ3+tags	Q2UXQ3+tags	Q2UXQ3+tags Q2UXQ3+tags	2	911.947	1822.89	25.1674	2.98	1.30589e+06
	Medium	[K].ASHLVATSEQQHFDPR.[Y]	1	1	Q2UXQ3+tags	Q2UXQ3+tags	Q2UXQ3+tags Q2UXQ3+tags	2	911.946	1822.88	45.0771	2.37	40349.9
	Medium	[R].GETYLIEPLK.[V]	1	1	Q2UXQ3+tags	Q2UXQ3+tags	Q2UXQ3+tags Q2UXQ3+tags	2	581.822	1162.64	53.3884	1.61	81371
	Medium	[R].WNDLQGGSGLNDIFEAQK.[I]	1	1	Q2UXQ3+tags	Q2UXQ3+tags	Q2UXQ3+tags Q2UXQ3+tags	2	996.477	1991.95	49.8677	1.73
	Medium	[K].ASHLVATSEQQHFDPR.[Y]	1	1	Q2UXQ3+tags	Q2UXQ3+tags	Q2UXQ3+tags Q2UXQ3+tags	4	456.476	1822.88	53.5735	1.89	155912
	Medium	[K].ASHLVATSEQQHFDPR.[Y]	1	1	Q2UXQ3+tags	Q2UXQ3+tags	Q2UXQ3+tags Q2UXQ3+tags	4	456.476	1822.88	61.6725	1.73	189107
	Medium	[R].WNDLQGGSGLNDIFEAQK.[I]	1	1	Q2UXQ3+tags	Q2UXQ3+tags	Q2UXQ3+tags Q2UXQ3+tags	2	996.479	1991.95	48.3494	2.49	114304
	Medium	[K].mcGVTLTNWESDKPIKK.[A]	1	1	Q2UXQ3+tags	Q2UXQ3+tags	Q2UXQ3+tags Q2UXQ3+tags	3	675.005	2023	57.4995	2.84
	Medium	[R].GETYLIEPLKVPDSESHAVYK.[Y]	1	1	Q2UXQ3+tags	Q2UXQ3+tags	Q2UXQ3+tags Q2UXQ3+tags	3	792.41	2375.21	50.4135	2.97	5.84543e+06
	Medium	[R].WNDLQGGSGLNDIFEAQK.[I]	1	1	Q2UXQ3+tags	Q2UXQ3+tags	Q2UXQ3+tags Q2UXQ3+tags	2	996.477	1991.95	60.657	1.53	17795.3
	Medium	[K].SGNVNDYEVVNPQK.[I]	1	1	Q2UXQ3+tags	Q2UXQ3+tags	Q2UXQ3+tags Q2UXQ3+tags	2	781.876	1562.75	63.2965	2.22	64331.4
	Medium	[K].ITGLPVGAVK.[Q]	1	1	Q2UXQ3+tags	Q2UXQ3+tags	Q2UXQ3+tags Q2UXQ3+tags	2	477.803	954.598	68.6679	1.07
	Medium	[K].ASHLVATSEQQHFDPR.[Y]	1	1	Q2UXQ3+tags	Q2UXQ3+tags	Q2UXQ3+tags Q2UXQ3+tags	3	608.3	1822.89	23.2085	1.9	737207
	Medium	[K].ASHLVATSEQQHFDPR.[Y]	1	1	Q2UXQ3+tags	Q2UXQ3+tags	Q2UXQ3+tags Q2UXQ3+tags	2	911.947	1822.89	42.3462	2.41
	Medium	[R].WNDLQGGSGLNDIFEAQK.[I]	1	1	Q2UXQ3+tags	Q2UXQ3+tags	Q2UXQ3+tags Q2UXQ3+tags	2	996.478	1991.95	46.3175	2.44	163389
	Medium	[R].IQNDADSTASISAcNGLK.[G]	1	1	Q2UXQ3+tags	Q2UXQ3+tags	Q2UXQ3+tags Q2UXQ3+tags	3	622.295	1864.87	35.6504	2.3	1.07663e+06
	Medium	[K].KKDEAPK.[M]	1	1	Q2UXQ3+tags	Q2UXQ3+tags	Q2UXQ3+tags Q2UXQ3+tags	2	408.235	815.462	8.2628	2.39
	Medium	[R].GETYLIEPLK.[V]	1	1	Q2UXQ3+tags	Q2UXQ3+tags	Q2UXQ3+tags Q2UXQ3+tags	2	581.822	1162.64	34.0732	1.56	1.39708e+07
	Medium	[R].AYMESmcDPK.[K]	1	1	Q2UXQ3+tags	Q2UXQ3+tags	Q2UXQ3+tags Q2UXQ3+tags	2	624.24	1247.47	17.9968	1.92	7919376
	Medium	[K].ASHLVATSEQQHFDPR.[Y]	1	1	Q2UXQ3+tags	Q2UXQ3+tags	Q2UXQ3+tags Q2UXQ3+tags	4	456.476	1822.88	57.6348	2.56	217695
	Medium	[R].EILNSFGEWR.[Q]	1	1	Q2UXQ3+tags	Q2UXQ3+tags	Q2UXQ3+tags Q2UXQ3+tags	2	625.812	1250.62	46.451	2.22	903810
	Medium	[R].WNDLQGGSGLNDIFEAQK.[I]	1	1	Q2UXQ3+tags	Q2UXQ3+tags	Q2UXQ3+tags Q2UXQ3+tags	2	996.475	1991.94	49.3589	2.37	34316.6
	Medium	[K].SGNVNDYEVVNPQK.[I]	1	1	Q2UXQ3+tags	Q2UXQ3+tags	Q2UXQ3+tags Q2UXQ3+tags	2	781.877	1562.75	33.5265	1.93	885542
	Medium	[R].AQDSYHFSDcSK.[N]	1	1	Q2UXQ3+tags	Q2UXQ3+tags	Q2UXQ3+tags Q2UXQ3+tags	3	482.197	1444.58	16.7703	1.93	3.55198e+06
	Medium	[K].SGNVNDYEVVNPQK.[I]	1	1	Q2UXQ3+tags	Q2UXQ3+tags	Q2UXQ3+tags Q2UXQ3+tags	2	781.877	1562.75	50.0768	2.03	38190.1
	Medium	[R].GETYLIEPLKVPDSESHAVYK.[Y]	1	1	Q2UXQ3+tags	Q2UXQ3+tags	Q2UXQ3+tags Q2UXQ3+tags	4	594.559	2375.21	63.6054	1.73	670644
	Medium	[K].ASHLVATSEQQHFDPR.[Y]	1	1	Q2UXQ3+tags	Q2UXQ3+tags	Q2UXQ3+tags Q2UXQ3+tags	4	456.476	1822.88	59.1467	1.59	175075
	Medium	[R].GETYLIEPLKVPDSESHAVYK.[Y]	1	1	Q2UXQ3+tags	Q2UXQ3+tags	Q2UXQ3+tags Q2UXQ3+tags	3	792.411	2375.22	58.0116	2.01	93835.1
	Medium	[R].AQDSYHFSDcSK.[N]	1	1	Q2UXQ3+tags	Q2UXQ3+tags	Q2UXQ3+tags Q2UXQ3+tags	3	482.198	1444.58	53.4237	1.32	64307.3
	Medium	[R].GETYLIEPLKVPDSESHAVYK.[Y]	1	1	Q2UXQ3+tags	Q2UXQ3+tags	Q2UXQ3+tags Q2UXQ3+tags	3	792.409	2375.21	64.2902	2.72	336497
	Medium	[R].AYmESmcDPK.[K]	1	1	Q2UXQ3+tags	Q2UXQ3+tags	Q2UXQ3+tags Q2UXQ3+tags	2	632.238	1263.47	20.9925	1.3	1.24483e+06
	Medium	[R].AQDSYHFSDcSK.[N]	1	1	Q2UXQ3+tags	Q2UXQ3+tags	Q2UXQ3+tags Q2UXQ3+tags	3	482.198	1444.58	50.7184	1.93
	Medium	[K].SGNVNDYEVVNPQK.[I]	1	1	Q2UXQ3+tags	Q2UXQ3+tags	Q2UXQ3+tags Q2UXQ3+tags	2	781.876	1562.75	56.147	2.06
High	A0A7E5X2W4	La-related protein 1-like OS=Trichoplusia ni OX=7111 GN=LOC113508673 PE=4 SV=1	FALSE	TRUE	FALSE	16.2246	16	25	16	1.32016e+08	67.07	141.6	8.28
	Confidence	Annotated Sequence	# Protein Groups	# Proteins	Master Protein Accessions	Protein Accessions	Protein Descriptions	Charge	m/z [Da]	MH+ [Da]	RT [min]	XCorr	Area
	High	[K].ENIEAAPGEVSDAPPTKQDDEEEEGFVPVISHGR.[R]	1	1	A0A7E5X2W4	A0A7E5X2W4	La-related protein 1-like OS=Trichoplusia ni OX=7111 GN=LOC113508673 PE=4 SV=1	4	912.928	3648.69	31.5004	3.84	1.37228e+07
	High	[R].VQPEPPVVSVPPPPKPAIVK.[A]	1	1	A0A7E5X2W4	A0A7E5X2W4	La-related protein 1-like OS=Trichoplusia ni OX=7111 GN=LOC113508673 PE=4 SV=1	3	692.414	2075.23	30.1342	3.27	1.87939e+08
	High	[K].QDDEEEEGFVPVISHGR.[R]	1	1	A0A7E5X2W4	A0A7E5X2W4	La-related protein 1-like OS=Trichoplusia ni OX=7111 GN=LOC113508673 PE=4 SV=1	2	971.943	1942.88	29.3678	3.47	1.40244e+06
	High	[R].VQPEPPVVSVPPPPKPAIVK.[A]	1	1	A0A7E5X2W4	A0A7E5X2W4	La-related protein 1-like OS=Trichoplusia ni OX=7111 GN=LOC113508673 PE=4 SV=1	3	692.413	2075.22	29.6296	2.08	126555
	High	[R].VSAEGAGPSYASVLNFR.[G]	1	1	A0A7E5X2W4	A0A7E5X2W4	La-related protein 1-like OS=Trichoplusia ni OX=7111 GN=LOC113508673 PE=4 SV=1	3	575.625	1724.86	35.6902	4	9.12854e+06
	High	[R].VSAEGAGPSYASVLNFR.[G]	1	1	A0A7E5X2W4	A0A7E5X2W4	La-related protein 1-like OS=Trichoplusia ni OX=7111 GN=LOC113508673 PE=4 SV=1	2	862.934	1724.86	35.6406	4.23	7.12472e+07
	High	[R].GGDSNKENIEAAPGEVSDAPPTK.[Q]	1	1	A0A7E5X2W4	A0A7E5X2W4	La-related protein 1-like OS=Trichoplusia ni OX=7111 GN=LOC113508673 PE=4 SV=1	3	761.697	2283.08	22.0225	4.21	1.38652e+07
	High	[K].APQPHTDPQNQPTPEQQQQSSESQPK.[K]	1	1	A0A7E5X2W4	A0A7E5X2W4	La-related protein 1-like OS=Trichoplusia ni OX=7111 GN=LOC113508673 PE=4 SV=1	3	971.452	2912.34	17.1802	4.82	5.59463e+07
	High	[R].GGSTGAPPPAAPAmIEQEKR.[S]	1	1	A0A7E5X2W4	A0A7E5X2W4	La-related protein 1-like OS=Trichoplusia ni OX=7111 GN=LOC113508673 PE=4 SV=1	3	660.998	1980.98	19.6583	2.48	2.33854e+07
	High	[K].KFVEAPIPK.[V]	1	1	A0A7E5X2W4	A0A7E5X2W4	La-related protein 1-like OS=Trichoplusia ni OX=7111 GN=LOC113508673 PE=4 SV=1	2	514.81	1028.61	20.673	3.51	6.32382e+07
	High	[R].KPPEEPQHQPPAKPEK.[V]	1	1	A0A7E5X2W4	A0A7E5X2W4	La-related protein 1-like OS=Trichoplusia ni OX=7111 GN=LOC113508673 PE=4 SV=1	3	612.991	1836.96	12.6502	3.96	40987.6
	High	[R].KPPEEPQHQPPAKPEK.[V]	1	1	A0A7E5X2W4	A0A7E5X2W4	La-related protein 1-like OS=Trichoplusia ni OX=7111 GN=LOC113508673 PE=4 SV=1	3	612.993	1836.96	12.1166	3.35	2.02598e+07
	High	[K].ENIEAAPGEVSDAPPTK.[Q]	1	1	A0A7E5X2W4	A0A7E5X2W4	La-related protein 1-like OS=Trichoplusia ni OX=7111 GN=LOC113508673 PE=4 SV=1	2	862.921	1724.83	24.4809	4.04	1.83692e+07
	High	[K].HGPQHSmRPENDTVSLNGEER.[G]	1	1	A0A7E5X2W4	A0A7E5X2W4	La-related protein 1-like OS=Trichoplusia ni OX=7111 GN=LOC113508673 PE=4 SV=1	3	802.701	2406.09	15.5177	3.89	6.33767e+06
	High	[K].HGPQHSmRPENDTVSLNGEER.[G]	1	1	A0A7E5X2W4	A0A7E5X2W4	La-related protein 1-like OS=Trichoplusia ni OX=7111 GN=LOC113508673 PE=4 SV=1	4	602.277	2406.09	15.4706	2.27	3.94133e+07
	High	[K].WVPLDIDVK.[A]	1	1	A0A7E5X2W4	A0A7E5X2W4	La-related protein 1-like OS=Trichoplusia ni OX=7111 GN=LOC113508673 PE=4 SV=1	2	542.806	1084.61	36.4105	2.07	4.13403e+07
	High	[K].FVEAPIPK.[V]	1	1	A0A7E5X2W4	A0A7E5X2W4	La-related protein 1-like OS=Trichoplusia ni OX=7111 GN=LOC113508673 PE=4 SV=1	2	450.763	900.519	24.6689	2.02	56242897
	High	[R].GGSTGAPPPAAPAmIEQEK.[R]	1	1	A0A7E5X2W4	A0A7E5X2W4	La-related protein 1-like OS=Trichoplusia ni OX=7111 GN=LOC113508673 PE=4 SV=1	2	912.945	1824.88	22.2792	1.8	3.35933e+07
	High	[R].VQPEPPVVSVPPPPKPAIVK.[A]	1	1	A0A7E5X2W4	A0A7E5X2W4	La-related protein 1-like OS=Trichoplusia ni OX=7111 GN=LOC113508673 PE=4 SV=1	2	1038.12	2075.23	30.2208	2.92	1.58153e+06
	High	[K].VNPWQVR.[G]	1	1	A0A7E5X2W4	A0A7E5X2W4	La-related protein 1-like OS=Trichoplusia ni OX=7111 GN=LOC113508673 PE=4 SV=1	2	449.748	898.489	24.4513	1.86	1.70038e+07
	High	[R].GGSTGAPPPAAPAmIEQEK.[R]	1	1	A0A7E5X2W4	A0A7E5X2W4	La-related protein 1-like OS=Trichoplusia ni OX=7111 GN=LOC113508673 PE=4 SV=1	2	912.945	1824.88	22.7965	1.7	4.94384e+07
	High	[R].cHSTPPPHDADSSHHNGNAEQDR.[K]	1	1	A0A7E5X2W4	A0A7E5X2W4	La-related protein 1-like OS=Trichoplusia ni OX=7111 GN=LOC113508673 PE=4 SV=1	4	642.267	2566.05	10.5916	3.56	615959
	Medium	[R].VQPEPPVVSVPPPPKPAIVK.[A]	1	1	A0A7E5X2W4	A0A7E5X2W4	La-related protein 1-like OS=Trichoplusia ni OX=7111 GN=LOC113508673 PE=4 SV=1	4	519.562	2075.23	30.2765	2.39	1.60112e+07
	Medium	[R].KPPEEPQHQPPAKPEK.[V]	1	1	A0A7E5X2W4	A0A7E5X2W4	La-related protein 1-like OS=Trichoplusia ni OX=7111 GN=LOC113508673 PE=4 SV=1	4	459.996	1836.96	12.1348	1.76	1.36863e+08
High	P04264	Keratin, type II cytoskeletal 1 OS=Homo sapiens GN=KRT1 PE=1 SV=6	TRUE	FALSE	FALSE	42.5466	25	34	21	1.2743e+08	99.4
	Confidence	Annotated Sequence	# Protein Groups	# Proteins	Master Protein Accessions	Protein Accessions	Protein Descriptions	Charge	m/z [Da]	MH+ [Da]	RT [min]	XCorr	Area
	High	[K].QISNLQQSISDAEQR.[G]	1	1	P04264	P04264	Keratin, type II cytoskeletal 1 OS=Homo sapiens GN=KRT1 PE=1 SV=6	2	858.929	1716.85	28.6211	3.81	8.83007e+07
	High	[K].QISNLQQSISDAEQR.[G]	1	1	P04264	P04264	Keratin, type II cytoskeletal 1 OS=Homo sapiens GN=KRT1 PE=1 SV=6	3	572.955	1716.85	28.6869	3.25
	High	[R].SGGGFSSGSAGIINYQR.[R]	1	1	P04264	P04264	Keratin, type II cytoskeletal 1 OS=Homo sapiens GN=KRT1 PE=1 SV=6	2	829.4	1657.79	28.5378	4.01	6.69049e+06
	High	[K].SLNNQFASFIDK.[V]	1	1	P04264	P04264	Keratin, type II cytoskeletal 1 OS=Homo sapiens GN=KRT1 PE=1 SV=6	2	692.349	1383.69	34.8374	2.53	1.33356e+08
	High	[K].WELLQQVDTSTR.[T]	1	1	P04264	P04264	Keratin, type II cytoskeletal 1 OS=Homo sapiens GN=KRT1 PE=1 SV=6	2	738.379	1475.75	35.0054	3.45	3.97777e+07
	High	[K].SLNNQFASFIDK.[V]	1	1	P04264	P04264	Keratin, type II cytoskeletal 1 OS=Homo sapiens GN=KRT1 PE=1 SV=6	2	692.35	1383.69	35.3459	2.15	143869
	High	[R].TNAENEFVTIKK.[D]	1	1	P04264	P04264	Keratin, type II cytoskeletal 1 OS=Homo sapiens GN=KRT1 PE=1 SV=6	3	465.249	1393.73	21.3261	3.59	5.64005e+07
	High	[R].GGGGGGYGSGGSSYGSGGGSYGSGGGGGGGR.[G]	1	1	P04264	P04264	Keratin, type II cytoskeletal 1 OS=Homo sapiens GN=KRT1 PE=1 SV=6	3	795.322	2383.95	19.8961	4.13	3.46203e+06
	High	[R].GGGGGGYGSGGSSYGSGGGSYGSGGGGGGGR.[G]	1	1	P04264	P04264	Keratin, type II cytoskeletal 1 OS=Homo sapiens GN=KRT1 PE=1 SV=6	2	1192.48	2383.95	19.9149	6.28	2.53772e+06
	High	[K].AEAESLYQSK.[Y]	1	1	P04264	P04264	Keratin, type II cytoskeletal 1 OS=Homo sapiens GN=KRT1 PE=1 SV=6	2	563.275	1125.54	19.1212	2.52	4.33297e+07
	High	[R].TNAENEFVTIKK.[D]	1	1	P04264	P04264	Keratin, type II cytoskeletal 1 OS=Homo sapiens GN=KRT1 PE=1 SV=6	2	697.369	1393.73	21.2864	3.14	10994176
	High	[K].YEELQITAGR.[H]	2	2	P04264; P04259	P04264; P04259	Keratin, type II cytoskeletal 1 OS=Homo sapiens GN=KRT1 PE=1 SV=6; Keratin, type II cytoskeletal 6B OS=Homo sapiens GN=KRT6B PE=1 SV=5	2	590.305	1179.6	26.359	2.5	6.03377e+07
	High	[R].FLEQQNQVLQTK.[W]	2	7	P35908; P04264	Q7Z794; P35908; Q9R0H5; Q6NXH9; P04264; Q6IFZ6; E1B991	Keratin, type II cytoskeletal 1b OS=Homo sapiens GN=KRT77 PE=2 SV=3; Keratin, type II cytoskeletal 2 epidermal OS=Homo sapiens GN=KRT2 PE=1 SV=2; Keratin, type II cytoskeletal 71 OS=Mus musculus GN=Krt71 PE=1 SV=1; Keratin, type II cytoskeletal 73 OS=Mus musculus GN=Krt73 PE=1 SV=1; Keratin, type II cytoskeletal 1 OS=Homo sapiens GN=KRT1 PE=1 SV=6; Keratin, type II cytoskeletal 1b OS=Mus musculus…	2	738.397	1475.79	25.9902	2.59	1.91523e+08
	High	[R].FSScGGGGGSFGAGGGFGSR.[S]	1	1	P04264	P04264	Keratin, type II cytoskeletal 1 OS=Homo sapiens GN=KRT1 PE=1 SV=6	2	883.373	1765.74	26.906	4.69	7.25449e+06
	High	[R].DYQELMNTK.[L]	1	2	P04264	Q3TTY5; P04264	Keratin, type II cytoskeletal 2 epidermal OS=Mus musculus GN=Krt2 PE=1 SV=1; Keratin, type II cytoskeletal 1 OS=Homo sapiens GN=KRT1 PE=1 SV=6	2	571.263	1141.52	27.0961	2.07	3.64696e+07
	High	[R].GSGGGSSGGSIGGR.[G]	1	1	P04264	P04264	Keratin, type II cytoskeletal 1 OS=Homo sapiens GN=KRT1 PE=1 SV=6	2	546.755	1092.5	11.5343	3.79	4.06662e+06
	High	[KR].NKYEDEINKR.[T]	3	11	P04264; P04259; P13647	H-INV:HIT000016045; P04264; P04259; P02538; Q8VED5; Q5XQN5; P48668; Q6IFZ6; P05787; Q922U2; P13647	Tax_Id=9606 Gene_Symbol=- Similar to Keratin, type II cytoskeletal 8 [OS=Homo sapiens]; Keratin, type II cytoskeletal 1 OS=Homo sapiens GN=KRT1 PE=1 SV=6; Keratin, type II cytoskeletal 6B OS=Homo sapiens GN=KRT6B PE=1 SV=5; Keratin, type II cytoskeletal 6A OS=Homo sapiens GN=KRT6A PE=1 SV=3; Keratin, type II cytoskeletal 79 OS=Mus musculus GN=Krt79 PE=2 SV=2; Keratin, type II cytoskeletal 5 OS=Bo…	3	436.89	1308.65	15.3142	2.94	89241568
	High	[KR].NKYEDEINKR.[T]	3	11	P04264; P04259; P13647	H-INV:HIT000016045; P04264; P04259; P02538; Q8VED5; Q5XQN5; P48668; Q6IFZ6; P05787; Q922U2; P13647	Tax_Id=9606 Gene_Symbol=- Similar to Keratin, type II cytoskeletal 8 [OS=Homo sapiens]; Keratin, type II cytoskeletal 1 OS=Homo sapiens GN=KRT1 PE=1 SV=6; Keratin, type II cytoskeletal 6B OS=Homo sapiens GN=KRT6B PE=1 SV=5; Keratin, type II cytoskeletal 6A OS=Homo sapiens GN=KRT6A PE=1 SV=3; Keratin, type II cytoskeletal 79 OS=Mus musculus GN=Krt79 PE=2 SV=2; Keratin, type II cytoskeletal 5 OS=Bo…	2	654.831	1308.65	15.3276	2.81	5.99091e+06
	High	[K].LNDLEDALQQAK.[E]	1	1	P04264	P04264	Keratin, type II cytoskeletal 1 OS=Homo sapiens GN=KRT1 PE=1 SV=6	2	679.352	1357.7	31.5599	2.65	1.09757e+08
	High	[K].NKLNDLEDALQQAK.[E]	1	1	P04264	P04264	Keratin, type II cytoskeletal 1 OS=Homo sapiens GN=KRT1 PE=1 SV=6	3	533.951	1599.84	31.5412	2.42	5.5475e+06
	High	[R].DYQELmNTK.[L]	1	2	P04264	Q3TTY5; P04264	Keratin, type II cytoskeletal 2 epidermal OS=Mus musculus GN=Krt2 PE=1 SV=1; Keratin, type II cytoskeletal 1 OS=Homo sapiens GN=KRT1 PE=1 SV=6	2	579.261	1157.52	20.5766	2.05	1.07492e+07
	High	[K].NMQDMVEDYR.[N]	1	1	P04264	P04264	Keratin, type II cytoskeletal 1 OS=Homo sapiens GN=KRT1 PE=1 SV=6	2	650.767	1300.53	29.3727	2.61	2.24949e+07
	High	[R].TNAENEFVTIK.[K]	1	1	P04264	P04264	Keratin, type II cytoskeletal 1 OS=Homo sapiens GN=KRT1 PE=1 SV=6	2	633.322	1265.64	26.411	2.18	1.30313e+08
	High	[KR].NKYEDEINKR.[T]	3	11	P04264; P04259; P13647	H-INV:HIT000016045; P04264; P04259; P02538; Q8VED5; Q5XQN5; P48668; Q6IFZ6; P05787; Q922U2; P13647	Tax_Id=9606 Gene_Symbol=- Similar to Keratin, type II cytoskeletal 8 [OS=Homo sapiens]; Keratin, type II cytoskeletal 1 OS=Homo sapiens GN=KRT1 PE=1 SV=6; Keratin, type II cytoskeletal 6B OS=Homo sapiens GN=KRT6B PE=1 SV=5; Keratin, type II cytoskeletal 6A OS=Homo sapiens GN=KRT6A PE=1 SV=3; Keratin, type II cytoskeletal 79 OS=Mus musculus GN=Krt79 PE=2 SV=2; Keratin, type II cytoskeletal 5 OS=Bo…	3	436.889	1308.65	15.8629	2.24
	High	[K].SKAEAESLYQSK.[Y]	1	1	P04264	P04264	Keratin, type II cytoskeletal 1 OS=Homo sapiens GN=KRT1 PE=1 SV=6	3	447.561	1340.67	16.1418	2.75	3.33863e+07
	High	[K].AQYEDIAQK.[S]	1	1	P04264	P04264	Keratin, type II cytoskeletal 1 OS=Homo sapiens GN=KRT1 PE=1 SV=6	2	533.264	1065.52	19.0346	2.3	1.18621e+08
	High	[R].SLVNLGGSK.[S]	1	1	P04264	P04264	Keratin, type II cytoskeletal 1 OS=Homo sapiens GN=KRT1 PE=1 SV=6	2	437.753	874.499	22.3751	2.07	7.04308e+07
	High	[KR].NKYEDEINK.[HR]	3	13	P04264; P04259; P13647	Q5XKE5; H-INV:HIT000016045; P04264; P04259; P02538; Q8VED5; Q5XQN5; P48668; Q6IFZ6; H-INV:HIT000292931; P05787; Q922U2; P13647	Keratin, type II cytoskeletal 79 OS=Homo sapiens GN=KRT79 PE=1 SV=2; Tax_Id=9606 Gene_Symbol=- Similar to Keratin, type II cytoskeletal 8 [OS=Homo sapiens]; Keratin, type II cytoskeletal 1 OS=Homo sapiens GN=KRT1 PE=1 SV=6; Keratin, type II cytoskeletal 6B OS=Homo sapiens GN=KRT6B PE=1 SV=5; Keratin, type II cytoskeletal 6A OS=Homo sapiens GN=KRT6A PE=1 SV=3; Keratin, type II cytoskeletal 79 OS=M…	2	576.779	1152.55	15.869	2.07	1.02627e+06
	High	[K].NKLNDLEDALQQAK.[E]	1	1	P04264	P04264	Keratin, type II cytoskeletal 1 OS=Homo sapiens GN=KRT1 PE=1 SV=6	2	800.421	1599.83	31.5924	3.19	8.2634e+06
	High	[R].GGSGGGGGGSSGGRGSGGGSSGGSIGGRGSSSGGVK.[S]	1	1	P04264	P04264	Keratin, type II cytoskeletal 1 OS=Homo sapiens GN=KRT1 PE=1 SV=6	4	685.565	2739.24	11.8892	4.12	361721
	High	[K].DVDGAYmTK.[V]	1	1	P04264	P04264	Keratin, type II cytoskeletal 1 OS=Homo sapiens GN=KRT1 PE=1 SV=6	2	508.224	1015.44	17.2332	1.71	1.07831e+07
	Medium	[R].SEIDNVK.[K]	1	3	P04264	P04264; Q5XQN5; Q922U2	Keratin, type II cytoskeletal 1 OS=Homo sapiens GN=KRT1 PE=1 SV=6; Keratin, type II cytoskeletal 5 OS=Bos taurus GN=KRT5 PE=1 SV=1; Keratin, type II cytoskeletal 5 OS=Mus musculus GN=Krt5 PE=1 SV=1	2	402.708	804.409	15.118	1.78	4.07785e+06
	Medium	[K].SKAEAESLYQSK.[Y]	1	1	P04264	P04264	Keratin, type II cytoskeletal 1 OS=Homo sapiens GN=KRT1 PE=1 SV=6	2	670.839	1340.67	16.1548	3.17	2.17648e+07
High	A0A7E5VL90	Adenylosuccinate lyase OS=Trichoplusia ni OX=7111 GN=LOC113494797 PE=3 SV=1	FALSE	TRUE	FALSE	43.6992	20	23	20	1.08915e+08	58.44
	Confidence	Annotated Sequence	# Protein Groups	# Proteins	Master Protein Accessions	Protein Accessions	Protein Descriptions	Charge	m/z [Da]	MH+ [Da]	RT [min]	XCorr	Area
	High	[R].LAAIISQLAK.[F]	1	2	A0A7E5VL90	A0A7E5VL90; A0A7E5VKZ8	Adenylosuccinate lyase OS=Trichoplusia ni OX=7111 GN=LOC113494797 PE=3 SV=1; Adenylosuccinate lyase OS=Trichoplusia ni OX=7111 GN=LOC113494722 PE=3 SV=1	2	514.329	1027.65	31.3766	2.82	1.38355e+08
	High	[R].ASLWLSDLLmDER.[A]	1	2	A0A7E5VL90	A0A7E5VL90; A0A7E5VKZ8	Adenylosuccinate lyase OS=Trichoplusia ni OX=7111 GN=LOC113494797 PE=3 SV=1; Adenylosuccinate lyase OS=Trichoplusia ni OX=7111 GN=LOC113494722 PE=3 SV=1	2	782.89	1564.77	44.6281	2.33	2.77303e+06
	High	[K].HGLDLLLPR.[L]	1	2	A0A7E5VL90	A0A7E5VL90; A0A7E5VKZ8	Adenylosuccinate lyase OS=Trichoplusia ni OX=7111 GN=LOC113494797 PE=3 SV=1; Adenylosuccinate lyase OS=Trichoplusia ni OX=7111 GN=LOC113494722 PE=3 SV=1	2	517.311	1033.62	30.4796	2.77	47258087
	High	[R].KVDLEVISALSGLGATVHK.[M]	1	2	A0A7E5VL90	A0A7E5VL90; A0A7E5VKZ8	Adenylosuccinate lyase OS=Trichoplusia ni OX=7111 GN=LOC113494797 PE=3 SV=1; Adenylosuccinate lyase OS=Trichoplusia ni OX=7111 GN=LOC113494722 PE=3 SV=1	3	646.374	1937.11	37.2958	4.64	6.45644e+06
	High	[K].SLPmLGFTHLQPAQLTTVGK.[R]	1	2	A0A7E5VL90	A0A7E5VL90; A0A7E5VKZ8	Adenylosuccinate lyase OS=Trichoplusia ni OX=7111 GN=LOC113494797 PE=3 SV=1; Adenylosuccinate lyase OS=Trichoplusia ni OX=7111 GN=LOC113494722 PE=3 SV=1	3	719.059	2155.16	35.9879	1.62	1.43177e+07
	High	[R].VLSHEAGAQVK.[Q]	1	2	A0A7E5VL90	A0A7E5VL90; A0A7E5VKZ8	Adenylosuccinate lyase OS=Trichoplusia ni OX=7111 GN=LOC113494797 PE=3 SV=1; Adenylosuccinate lyase OS=Trichoplusia ni OX=7111 GN=LOC113494722 PE=3 SV=1	2	569.814	1138.62	12.9775	2.62	1.36506e+07
	High	[K].QHGKDNDLIDR.[V]	1	2	A0A7E5VL90	A0A7E5VL90; A0A7E5VKZ8	Adenylosuccinate lyase OS=Trichoplusia ni OX=7111 GN=LOC113494797 PE=3 SV=1; Adenylosuccinate lyase OS=Trichoplusia ni OX=7111 GN=LOC113494722 PE=3 SV=1	3	437.553	1310.64	13.0838	3.3	545862
	High	[K].EmEEPFEASQIGSSAmPYK.[R]	1	2	A0A7E5VL90	A0A7E5VL90; A0A7E5VKZ8	Adenylosuccinate lyase OS=Trichoplusia ni OX=7111 GN=LOC113494797 PE=3 SV=1; Adenylosuccinate lyase OS=Trichoplusia ni OX=7111 GN=LOC113494722 PE=3 SV=1	2	1081.97	2162.93	30.9295	2.08	3.38884e+06
	High	[R].YLVTGQTYSR.[K]	1	1	A0A7E5VL90	A0A7E5VL90	Adenylosuccinate lyase OS=Trichoplusia ni OX=7111 GN=LOC113494797 PE=3 SV=1	2	594.307	1187.61	22.7166	1.8	2.9852e+07
	High	[R].VAELAGFDK.[R]	1	2	A0A7E5VL90	A0A7E5VL90; A0A7E5VKZ8	Adenylosuccinate lyase OS=Trichoplusia ni OX=7111 GN=LOC113494797 PE=3 SV=1; Adenylosuccinate lyase OS=Trichoplusia ni OX=7111 GN=LOC113494722 PE=3 SV=1	2	475.253	949.499	25.3094	2.54	3.99502e+07
	High	[R].KEmEEPFEASQIGSSAmPYK.[R]	1	2	A0A7E5VL90	A0A7E5VL90; A0A7E5VKZ8	Adenylosuccinate lyase OS=Trichoplusia ni OX=7111 GN=LOC113494797 PE=3 SV=1; Adenylosuccinate lyase OS=Trichoplusia ni OX=7111 GN=LOC113494722 PE=3 SV=1	3	764.345	2291.02	26.5548	4.39	2.41038e+07
	High	[K].DSYFAPIISQLDK.[I]	1	1	A0A7E5VL90	A0A7E5VL90	Adenylosuccinate lyase OS=Trichoplusia ni OX=7111 GN=LOC113494797 PE=3 SV=1	2	748.884	1496.76	44.0232	1.68	2.13094e+07
	High	[K].GTTGTQASFLQLFK.[G]	1	2	A0A7E5VL90	A0A7E5VL90; A0A7E5VKZ8	Adenylosuccinate lyase OS=Trichoplusia ni OX=7111 GN=LOC113494797 PE=3 SV=1; Adenylosuccinate lyase OS=Trichoplusia ni OX=7111 GN=LOC113494722 PE=3 SV=1	2	749.899	1498.79	39.4457	3.42	5.99196e+07
	High	[K].LWIYLAK.[A]	1	2	A0A7E5VL90	A0A7E5VL90; A0A7E5VKZ8	Adenylosuccinate lyase OS=Trichoplusia ni OX=7111 GN=LOC113494797 PE=3 SV=1; Adenylosuccinate lyase OS=Trichoplusia ni OX=7111 GN=LOC113494722 PE=3 SV=1	2	453.776	906.545	34.9755	1.79	8.89604e+06
	High	[K].EmQYNFSDQK.[K]	1	2	A0A7E5VL90	A0A7E5VL90; A0A7E5VKZ8	Adenylosuccinate lyase OS=Trichoplusia ni OX=7111 GN=LOC113494797 PE=3 SV=1; Adenylosuccinate lyase OS=Trichoplusia ni OX=7111 GN=LOC113494722 PE=3 SV=1	2	653.274	1305.54	20.9589	2.22	1.69462e+07
	High	[R].RVAELAGFDKR.[Y]	1	2	A0A7E5VL90	A0A7E5VL90; A0A7E5VKZ8	Adenylosuccinate lyase OS=Trichoplusia ni OX=7111 GN=LOC113494797 PE=3 SV=1; Adenylosuccinate lyase OS=Trichoplusia ni OX=7111 GN=LOC113494722 PE=3 SV=1	3	421.238	1261.7	18.714	3.03	2.09532e+06
	High	[K].ILDASTFIGR.[A]	1	2	A0A7E5VL90	A0A7E5VL90; A0A7E5VKZ8	Adenylosuccinate lyase OS=Trichoplusia ni OX=7111 GN=LOC113494797 PE=3 SV=1; Adenylosuccinate lyase OS=Trichoplusia ni OX=7111 GN=LOC113494722 PE=3 SV=1	2	546.806	1092.61	33.9376	2.03	128471672
	High	[R].KEMEEPFEASQIGSSAmPYK.[R]	1	2	A0A7E5VL90	A0A7E5VL90; A0A7E5VKZ8	Adenylosuccinate lyase OS=Trichoplusia ni OX=7111 GN=LOC113494797 PE=3 SV=1; Adenylosuccinate lyase OS=Trichoplusia ni OX=7111 GN=LOC113494722 PE=3 SV=1	3	759.013	2275.02	28.2843	3.69
	High	[K].QTLAEVEKPVALNI.[-]	1	2	A0A7E5VL90	A0A7E5VL90; A0A7E5VKZ8	Adenylosuccinate lyase OS=Trichoplusia ni OX=7111 GN=LOC113494797 PE=3 SV=1; Adenylosuccinate lyase OS=Trichoplusia ni OX=7111 GN=LOC113494722 PE=3 SV=1	2	762.936	1524.87	34.9614	3.14	53351755
	High	[K].GTTGTQASFLQLFK.[G]	1	2	A0A7E5VL90	A0A7E5VL90; A0A7E5VKZ8	Adenylosuccinate lyase OS=Trichoplusia ni OX=7111 GN=LOC113494797 PE=3 SV=1; Adenylosuccinate lyase OS=Trichoplusia ni OX=7111 GN=LOC113494722 PE=3 SV=1	3	500.268	1498.79	39.5338	2.18	780589
	High	[R].HDVmAHVHTLAER.[C]	1	2	A0A7E5VL90	A0A7E5VL90; A0A7E5VKZ8	Adenylosuccinate lyase OS=Trichoplusia ni OX=7111 GN=LOC113494797 PE=3 SV=1; Adenylosuccinate lyase OS=Trichoplusia ni OX=7111 GN=LOC113494722 PE=3 SV=1	3	511.252	1531.74	14.3163	3.14	4.96162e+06
	Medium	[R].VAELAGFDKR.[Y]	1	2	A0A7E5VL90	A0A7E5VL90; A0A7E5VKZ8	Adenylosuccinate lyase OS=Trichoplusia ni OX=7111 GN=LOC113494797 PE=3 SV=1; Adenylosuccinate lyase OS=Trichoplusia ni OX=7111 GN=LOC113494722 PE=3 SV=1	2	553.304	1105.6	21.3407	2.84	1.71514e+07
	Medium	[K].EmEEPFEASQIGSSAmPYK.[R]	1	2	A0A7E5VL90	A0A7E5VL90; A0A7E5VKZ8	Adenylosuccinate lyase OS=Trichoplusia ni OX=7111 GN=LOC113494797 PE=3 SV=1; Adenylosuccinate lyase OS=Trichoplusia ni OX=7111 GN=LOC113494722 PE=3 SV=1	3	721.647	2162.93	30.943	1.88	3.24816e+06
High	P13645	Keratin, type I cytoskeletal 10 OS=Homo sapiens GN=KRT10 PE=1 SV=6	TRUE	FALSE	FALSE	34.9315	19	20	16	8.84755e+07	50.83
	Confidence	Annotated Sequence	# Protein Groups	# Proteins	Master Protein Accessions	Protein Accessions	Protein Descriptions	Charge	m/z [Da]	MH+ [Da]	RT [min]	XCorr	Area
	High	[R].AETEcQNTEYQQLLDIK.[I]	1	1	P13645	P13645	Keratin, type I cytoskeletal 10 OS=Homo sapiens GN=KRT10 PE=1 SV=6	2	1041.99	2082.97	35.0306	1.45	1.88422e+07
	High	[K].GSLGGGFSSGGFSGGSFSR.[G]	1	1	P13645	P13645	Keratin, type I cytoskeletal 10 OS=Homo sapiens GN=KRT10 PE=1 SV=6	2	854.39	1707.77	32.1757	3.77	1.0623e+07
	High	[K].ELTTEIDNNIEQISSYK.[S]	1	1	P13645	P13645	Keratin, type I cytoskeletal 10 OS=Homo sapiens GN=KRT10 PE=1 SV=6	2	998.99	1996.97	38.0098	3.63	1.29257e+06
	High	[R].LENEIQTYR.[S]	1	1	P13645	P13645	Keratin, type I cytoskeletal 10 OS=Homo sapiens GN=KRT10 PE=1 SV=6	2	583.297	1165.59	22.2716	3.04	8.80816e+07
	High	[R].LKYENEVALR.[Q]	1	1	P13645	P13645	Keratin, type I cytoskeletal 10 OS=Homo sapiens GN=KRT10 PE=1 SV=6	3	412.231	1234.68	21.8694	2.93	4.78476e+07
	High	[R].QSVEADINGLRR.[V]	1	2	P13645	P13645; O77727	Keratin, type I cytoskeletal 10 OS=Homo sapiens GN=KRT10 PE=1 SV=6; Keratin, type I cytoskeletal 15 OS=Ovis aries GN=KRT15 PE=2 SV=1	3	453.244	1357.72	23.4651	3.11	4.65958e+07
	High	[R].SGGGGGGGGcGGGGGVSSLR.[I]	1	1	P13645	P13645	Keratin, type I cytoskeletal 10 OS=Homo sapiens GN=KRT10 PE=1 SV=6	2	775.344	1549.68	17.2158	4.23	3.23927e+06
	High	[K].YENEVALR.[Q]	1	1	P13645	P13645	Keratin, type I cytoskeletal 10 OS=Homo sapiens GN=KRT10 PE=1 SV=6	2	497.254	993.5	20.9725	2.06	3.28452e+07
	High	[K].QSLEASLAETEGR.[Y]	1	1	P13645	P13645	Keratin, type I cytoskeletal 10 OS=Homo sapiens GN=KRT10 PE=1 SV=6	2	695.845	1390.68	27.5822	3.75	4.97829e+07
	High	[R].ALEESNYELEGK.[I]	1	1	P13645	P13645	Keratin, type I cytoskeletal 10 OS=Homo sapiens GN=KRT10 PE=1 SV=6	2	691.328	1381.65	24.2932	2.79	76672629
	High	[K].IRLENEIQTYR.[S]	1	1	P13645	P13645	Keratin, type I cytoskeletal 10 OS=Homo sapiens GN=KRT10 PE=1 SV=6	2	717.888	1434.77	24.9338	3.72	6201577
	High	[K].VTmQNLNDR.[L]	3	10	P02533; P13645; P08779	Q9Z2K1; P02533; Q7Z3Y7; P13645; Q148H6; Q7Z3Y9; Q7Z3Z0; Q3ZAW8; Q7Z3Y8; P08779	Keratin, type I cytoskeletal 16 OS=Mus musculus GN=Krt16 PE=1 SV=3; Keratin, type I cytoskeletal 14 OS=Homo sapiens GN=KRT14 PE=1 SV=4; Keratin, type I cytoskeletal 28 OS=Homo sapiens GN=KRT28 PE=1 SV=2; Keratin, type I cytoskeletal 10 OS=Homo sapiens GN=KRT10 PE=1 SV=6; Keratin, type I cytoskeletal 28 OS=Bos taurus GN=KRT28 PE=2 SV=1; Keratin, type I cytoskeletal 26 OS=Homo sapiens GN=KRT26 PE=1…	2	553.767	1106.53	14.5476	2.72	3.2039e+07
	High	[R].AETEcQNTEYQQLLDIK.[I]	1	1	P13645	P13645	Keratin, type I cytoskeletal 10 OS=Homo sapiens GN=KRT10 PE=1 SV=6	3	694.992	2082.96	35.0577	1.89	1.03999e+07
	High	[KR].LAADDFR.[ATILV]	3	25	P02533; P13645; P08779	Q14532; Q9Z2K1; O76015; O76013; P02533; Q15323; Q7Z3Y7; P08727; Q2M2I5; Q14525; P13645; Q92764; Q6IFX2; Q497I4; O77727; Q148H6; P05784; P19012; P02534; Q3ZAW8; Q04695; P19001; O76014; P08779; Q9QWL7	Keratin, type I cuticular Ha2 OS=Homo sapiens GN=KRT32 PE=1 SV=3; Keratin, type I cytoskeletal 16 OS=Mus musculus GN=Krt16 PE=1 SV=3; Keratin, type I cuticular Ha8 OS=Homo sapiens GN=KRT38 PE=2 SV=3; Keratin, type I cuticular Ha6 OS=Homo sapiens GN=KRT36 PE=1 SV=1; Keratin, type I cytoskeletal 14 OS=Homo sapiens GN=KRT14 PE=1 SV=4; Keratin, type I cuticular Ha1 OS=Homo sapiens GN=KRT31 PE=2 SV=3;…	2	404.204	807.4	22.1774	1.97	1.08382e+08
	High	[R].LASYLDK.[V]	4	11	P02533; P13645; P35527; P08779	P02533; P08727; P13645; P05784; P19012; Q99456; Q04695; P19001; P35527; P08779; Q9QWL7	Keratin, type I cytoskeletal 14 OS=Homo sapiens GN=KRT14 PE=1 SV=4; Keratin, type I cytoskeletal 19 OS=Homo sapiens GN=KRT19 PE=1 SV=4; Keratin, type I cytoskeletal 10 OS=Homo sapiens GN=KRT10 PE=1 SV=6; Keratin, type I cytoskeletal 18 OS=Mus musculus GN=Krt18 PE=1 SV=5; Keratin, type I cytoskeletal 15 OS=Homo sapiens GN=KRT15 PE=1 SV=3; Keratin, type I cytoskeletal 12 OS=Homo sapiens GN=KRT12 PE…	2	405.224	809.44	20.2596	2.18	107661134
	High	[R].SLLEGEGSSGGGGR.[G]	1	1	P13645	P13645	Keratin, type I cytoskeletal 10 OS=Homo sapiens GN=KRT10 PE=1 SV=6	2	631.802	1262.6	19.9231	2.73	2.44436e+07
	High	[KR].DAEAWFNEK.[S]	1	5	P13645	Q7Z3Y7; P13645; Q148H6; Q7Z3Z0; Q7Z3Y8	Keratin, type I cytoskeletal 28 OS=Homo sapiens GN=KRT28 PE=1 SV=2; Keratin, type I cytoskeletal 10 OS=Homo sapiens GN=KRT10 PE=1 SV=6; Keratin, type I cytoskeletal 28 OS=Bos taurus GN=KRT28 PE=2 SV=1; Keratin, type I cytoskeletal 25 OS=Homo sapiens GN=KRT25 PE=1 SV=1; Keratin, type I cytoskeletal 27 OS=Homo sapiens GN=KRT27 PE=1 SV=2	2	555.249	1109.49	31.2791	2.21	2.44719e+07
	High	[R].VLDELTLTK.[AT]	1	2	P13645	P13645; O77727	Keratin, type I cytoskeletal 10 OS=Homo sapiens GN=KRT10 PE=1 SV=6; Keratin, type I cytoskeletal 15 OS=Ovis aries GN=KRT15 PE=2 SV=1	2	516.303	1031.6	29.556	2	1.00672e+08
	High	[R].SQYEQLAEQNR.[K]	1	1	P13645	P13645	Keratin, type I cytoskeletal 10 OS=Homo sapiens GN=KRT10 PE=1 SV=6	2	683.324	1365.64	21.3061	2.18	3.27108e+07
	High	[K].SEITELR.[R]	1	1	P13645	P13645	Keratin, type I cytoskeletal 10 OS=Homo sapiens GN=KRT10 PE=1 SV=6	2	424.229	847.452	20.7134	1.81	38769137
High	P35527	Keratin, type I cytoskeletal 9 OS=Homo sapiens GN=KRT9 PE=1 SV=3	TRUE	FALSE	FALSE	35.4735	16	17	15	6.39792e+07	51.32
	Confidence	Annotated Sequence	# Protein Groups	# Proteins	Master Protein Accessions	Protein Accessions	Protein Descriptions	Charge	m/z [Da]	MH+ [Da]	RT [min]	XCorr	Area
	High	[K].EIETYHNLLEGGQEDFESSGAGK.[I]	1	1	P35527	P35527	Keratin, type I cytoskeletal 9 OS=Homo sapiens GN=KRT9 PE=1 SV=3	3	837.384	2510.14	32.8202	4.26	2.55528e+07
	High	[K].EIETYHNLLEGGQEDFESSGAGK.[I]	1	1	P35527	P35527	Keratin, type I cytoskeletal 9 OS=Homo sapiens GN=KRT9 PE=1 SV=3	2	1255.57	2510.13	32.8642	3.74	2.74952e+06
	High	[K].TLLDIDNTR.[M]	1	1	P35527	P35527	Keratin, type I cytoskeletal 9 OS=Homo sapiens GN=KRT9 PE=1 SV=3	2	530.786	1060.56	28.3665	1.97	6.47693e+07
	High	[R].QVLDNLTMEK.[S]	1	1	P35527	P35527	Keratin, type I cytoskeletal 9 OS=Homo sapiens GN=KRT9 PE=1 SV=3	2	595.808	1190.61	27.8399	2.58	3.74567e+07
	High	[R].GGSGGSYGGGGSGGGYGGGSGSR.[G]	1	1	P35527	P35527	Keratin, type I cytoskeletal 9 OS=Homo sapiens GN=KRT9 PE=1 SV=3	2	896.368	1791.73	15.9917	4.29	1.29622e+07
	High	[K].STMQELNSR.[L]	1	1	P35527	P35527	Keratin, type I cytoskeletal 9 OS=Homo sapiens GN=KRT9 PE=1 SV=3	2	533.253	1065.5	17.685	2.21	5.13234e+07
	High	[R].SGGGGGGGLGSGGSIR.[S]	1	1	P35527	P35527	Keratin, type I cytoskeletal 9 OS=Homo sapiens GN=KRT9 PE=1 SV=3	2	616.803	1232.6	17.266	2.38	5.96333e+07
	High	[R].GGSGGSHGGGSGFGGESGGSYGGGEEASGSGGGYGGGSGK.[S]	1	1	P35527	P35527	Keratin, type I cytoskeletal 9 OS=Homo sapiens GN=KRT9 PE=1 SV=3	3	1075.1	3223.28	20.411	6.81	5.0968e+06
	High	[R].QGVDADINGLR.[Q]	1	1	P35527	P35527	Keratin, type I cytoskeletal 9 OS=Homo sapiens GN=KRT9 PE=1 SV=3	2	579.3	1157.59	25.8143	3.2	6.39587e+07
	High	[K].VQALEEANNDLENK.[I]	1	1	P35527	P35527	Keratin, type I cytoskeletal 9 OS=Homo sapiens GN=KRT9 PE=1 SV=3	2	793.886	1586.77	24.9069	2.66	6.32097e+07
	High	[R].QEYEQLIAK.[N]	1	1	P35527	P35527	Keratin, type I cytoskeletal 9 OS=Homo sapiens GN=KRT9 PE=1 SV=3	2	561.296	1121.58	24.9622	3.17	5.54086e+07
	High	[R].FSSSSGYGGGSSR.[V]	1	1	P35527	P35527	Keratin, type I cytoskeletal 9 OS=Homo sapiens GN=KRT9 PE=1 SV=3	2	618.268	1235.53	16.1081	3	3.35158e+07
	High	[KR].MTLDDFR.[KI]	1	1	P35527	P35527	Keratin, type I cytoskeletal 9 OS=Homo sapiens GN=KRT9 PE=1 SV=3	2	449.21	897.414	29.7265	1.76	3.35387e+07
	High	[R].LASYLDK.[V]	4	11	P02533; P13645; P35527; P08779	P02533; P08727; P13645; P05784; P19012; Q99456; Q04695; P19001; P35527; P08779; Q9QWL7	Keratin, type I cytoskeletal 14 OS=Homo sapiens GN=KRT14 PE=1 SV=4; Keratin, type I cytoskeletal 19 OS=Homo sapiens GN=KRT19 PE=1 SV=4; Keratin, type I cytoskeletal 10 OS=Homo sapiens GN=KRT10 PE=1 SV=6; Keratin, type I cytoskeletal 18 OS=Mus musculus GN=Krt18 PE=1 SV=5; Keratin, type I cytoskeletal 15 OS=Homo sapiens GN=KRT15 PE=1 SV=3; Keratin, type I cytoskeletal 12 OS=Homo sapiens GN=KRT12 PE…	2	405.224	809.44	20.2596	2.18	107661134
	High	[R].IKFEMEQNLR.[Q]	1	1	P35527	P35527	Keratin, type I cytoskeletal 9 OS=Homo sapiens GN=KRT9 PE=1 SV=3	3	436.564	1307.68	25.3764	2.5	2.44727e+07
	High	[R].FSSSGGGGGGGR.[F]	1	1	P35527	P35527	Keratin, type I cytoskeletal 9 OS=Homo sapiens GN=KRT9 PE=1 SV=3	2	491.72	982.434	11.0369	2.52	2.00489e+06
	Medium	[K].IQDWYDKK.[G]	1	1	P35527	P35527	Keratin, type I cytoskeletal 9 OS=Homo sapiens GN=KRT9 PE=1 SV=3	2	548.278	1095.55	19.5038	2.08	5.8719e+06
High	A0A7E5VKR1	Vacuolar proton pump subunit B OS=Trichoplusia ni OX=7111 GN=LOC113494681 PE=3 SV=1	FALSE	TRUE	FALSE	25.3521	11	15	11	5.34726e+07	36.55
	Confidence	Annotated Sequence	# Protein Groups	# Proteins	Master Protein Accessions	Protein Accessions	Protein Descriptions	Charge	m/z [Da]	MH+ [Da]	RT [min]	XCorr	Area
	High	[K].AVVQVFEGTSGIDAK.[N]	1	1	A0A7E5VKR1	A0A7E5VKR1	Vacuolar proton pump subunit B OS=Trichoplusia ni OX=7111 GN=LOC113494681 PE=3 SV=1	2	760.902	1520.8	31.2654	2.99	4.14434e+07
	High	[K].AVVQVFEGTSGIDAK.[N]	1	1	A0A7E5VKR1	A0A7E5VKR1	Vacuolar proton pump subunit B OS=Trichoplusia ni OX=7111 GN=LOC113494681 PE=3 SV=1	3	507.603	1520.79	31.2944	2.68
	High	[K].NTLcEFTGDILR.[T]	1	1	A0A7E5VKR1	A0A7E5VKR1	Vacuolar proton pump subunit B OS=Trichoplusia ni OX=7111 GN=LOC113494681 PE=3 SV=1	2	719.854	1438.7	37.1448	3.24	1.03639e+07
	High	[R].IPASILAEFYPR.[D]	1	1	A0A7E5VKR1	A0A7E5VKR1	Vacuolar proton pump subunit B OS=Trichoplusia ni OX=7111 GN=LOC113494681 PE=3 SV=1	2	688.883	1376.76	41.8507	2.75	1.41767e+07
	High	[K].NFISQGNYENR.[T]	1	1	A0A7E5VKR1	A0A7E5VKR1	Vacuolar proton pump subunit B OS=Trichoplusia ni OX=7111 GN=LOC113494681 PE=3 SV=1	2	671.313	1341.62	23.5686	2.17	3.01041e+07
	High	[R].SGQVLEVSGSK.[A]	1	1	A0A7E5VKR1	A0A7E5VKR1	Vacuolar proton pump subunit B OS=Trichoplusia ni OX=7111 GN=LOC113494681 PE=3 SV=1	2	545.79	1090.57	18.7185	2.51	3.77683e+07
	High	[-].mATTAATLTSQQAAK.[Q]	1	1	A0A7E5VKR1	A0A7E5VKR1	Vacuolar proton pump subunit B OS=Trichoplusia ni OX=7111 GN=LOC113494681 PE=3 SV=1	2	702.87	1404.73	27.1348	2.85	7.61782e+07
	High	[R].VFNGSGKPIDK.[G]	1	1	A0A7E5VKR1	A0A7E5VKR1	Vacuolar proton pump subunit B OS=Trichoplusia ni OX=7111 GN=LOC113494681 PE=3 SV=1	2	581.316	1161.62	15.0755	2.51	4.64904e+06
	High	[R].QIYPPVNVLPSLSR.[L]	1	1	A0A7E5VKR1	A0A7E5VKR1	Vacuolar proton pump subunit B OS=Trichoplusia ni OX=7111 GN=LOC113494681 PE=3 SV=1	2	791.951	1582.9	38.3967	2.62	29480041
	High	[R].IPASILAEFYPR.[D]	1	1	A0A7E5VKR1	A0A7E5VKR1	Vacuolar proton pump subunit B OS=Trichoplusia ni OX=7111 GN=LOC113494681 PE=3 SV=1	2	688.884	1376.76	41.3407	3.02	1.41767e+07
	High	[R].TPVSEDmLGR.[V]	1	1	A0A7E5VKR1	A0A7E5VKR1	Vacuolar proton pump subunit B OS=Trichoplusia ni OX=7111 GN=LOC113494681 PE=3 SV=1	2	560.769	1120.53	19.8867	2.26	2.15835e+07
	High	[R].DFISQPR.[L]	1	1	A0A7E5VKR1	A0A7E5VKR1	Vacuolar proton pump subunit B OS=Trichoplusia ni OX=7111 GN=LOC113494681 PE=3 SV=1	2	431.725	862.442	23.3975	1.53	2.55278e+07
	High	[K].FSEIVQLR.[L]	1	1	A0A7E5VKR1	A0A7E5VKR1	Vacuolar proton pump subunit B OS=Trichoplusia ni OX=7111 GN=LOC113494681 PE=3 SV=1	2	496.282	991.556	28.9656	2.45	4.27961e+07
	High	[R].QIYPPVNVLPSLSR.[L]	1	1	A0A7E5VKR1	A0A7E5VKR1	Vacuolar proton pump subunit B OS=Trichoplusia ni OX=7111 GN=LOC113494681 PE=3 SV=1	3	528.303	1582.9	38.3586	2.27	1.27322e+06
	Medium	[R].TPVSEDMLGR.[V]	1	1	A0A7E5VKR1	A0A7E5VKR1	Vacuolar proton pump subunit B OS=Trichoplusia ni OX=7111 GN=LOC113494681 PE=3 SV=1	2	552.772	1104.54	24.9944	2.22	3.73985e+06
High	A0A7E5WZM0	ATP synthase subunit alpha OS=Trichoplusia ni OX=7111 GN=LOC113507229 PE=3 SV=1	FALSE	TRUE	FALSE	26.3914	13	18	13	4.91689e+07	42.98
	Confidence	Annotated Sequence	# Protein Groups	# Proteins	Master Protein Accessions	Protein Accessions	Protein Descriptions	Charge	m/z [Da]	MH+ [Da]	RT [min]	XCorr	Area
	High	[K].AAEISTILEER.[I]	1	1	A0A7E5WZM0	A0A7E5WZM0	ATP synthase subunit alpha OS=Trichoplusia ni OX=7111 GN=LOC113507229 PE=3 SV=1	2	616.331	1231.65	31.388	2.95	4.36099e+07
	High	[R].EAYPGDVFYLHSR.[L]	1	1	A0A7E5WZM0	A0A7E5WZM0	ATP synthase subunit alpha OS=Trichoplusia ni OX=7111 GN=LOC113507229 PE=3 SV=1	3	518.584	1553.74	30.6866	2.66	3.66416e+07
	High	[K].HALIIYDDLSK.[Q]	1	1	A0A7E5WZM0	A0A7E5WZM0	ATP synthase subunit alpha OS=Trichoplusia ni OX=7111 GN=LOC113507229 PE=3 SV=1	2	644.351	1287.69	28.1951	2.44	3.79793e+07
	High	[R].EAYPGDVFYLHSR.[L]	1	1	A0A7E5WZM0	A0A7E5WZM0	ATP synthase subunit alpha OS=Trichoplusia ni OX=7111 GN=LOC113507229 PE=3 SV=1	2	777.373	1553.74	30.6116	2.71	6.6386e+06
	High	[R].TGAIVDVPVGEQLLGR.[V]	1	1	A0A7E5WZM0	A0A7E5WZM0	ATP synthase subunit alpha OS=Trichoplusia ni OX=7111 GN=LOC113507229 PE=3 SV=1	2	812.457	1623.91	38.0883	3.44	3.52083e+07
	High	[R].TGAIVDVPVGEQLLGR.[V]	1	1	A0A7E5WZM0	A0A7E5WZM0	ATP synthase subunit alpha OS=Trichoplusia ni OX=7111 GN=LOC113507229 PE=3 SV=1	3	541.974	1623.91	38.1092	2.66	1.33912e+06
	High	[K].GmALNLEPDNVGVVVFGNDK.[L]	1	1	A0A7E5WZM0	A0A7E5WZM0	ATP synthase subunit alpha OS=Trichoplusia ni OX=7111 GN=LOC113507229 PE=3 SV=1	2	1052.52	2104.04	40.1241	2.37	939499
	High	[K].TALAIDTIINQQR.[F]	1	1	A0A7E5WZM0	A0A7E5WZM0	ATP synthase subunit alpha OS=Trichoplusia ni OX=7111 GN=LOC113507229 PE=3 SV=1	2	728.91	1456.81	34.7373	3.73	1.86046e+07
	High	[K].TALAIDTIINQQR.[F]	1	1	A0A7E5WZM0	A0A7E5WZM0	ATP synthase subunit alpha OS=Trichoplusia ni OX=7111 GN=LOC113507229 PE=3 SV=1	3	486.275	1456.81	34.7489	2.63	1.59445e+06
	High	[K].TSHQSLLATIAK.[D]	1	1	A0A7E5WZM0	A0A7E5WZM0	ATP synthase subunit alpha OS=Trichoplusia ni OX=7111 GN=LOC113507229 PE=3 SV=1	3	423.91	1269.72	23.063	2.87	2.84763e+07
	High	[R].VVDALGNAIDGK.[G]	1	1	A0A7E5WZM0	A0A7E5WZM0	ATP synthase subunit alpha OS=Trichoplusia ni OX=7111 GN=LOC113507229 PE=3 SV=1	2	586.32	1171.63	26.1868	2.42
	High	[R].ELIIGDR.[Q]	1	1	A0A7E5WZM0	A0A7E5WZM0	ATP synthase subunit alpha OS=Trichoplusia ni OX=7111 GN=LOC113507229 PE=3 SV=1	2	408.234	815.462	24.0082	1.79	3.19327e+07
	High	[K].AVDSLVPIGR.[G]	1	1	A0A7E5WZM0	A0A7E5WZM0	ATP synthase subunit alpha OS=Trichoplusia ni OX=7111 GN=LOC113507229 PE=3 SV=1	2	513.801	1026.59	29.4918	2.44	6.12084e+07
	High	[R].QMSLLLR.[R]	1	1	A0A7E5WZM0	A0A7E5WZM0	ATP synthase subunit alpha OS=Trichoplusia ni OX=7111 GN=LOC113507229 PE=3 SV=1	2	430.755	860.502	29.0492	1.88	8.41705e+06
	High	[K].GmALNLEPDNVGVVVFGNDK.[L]	1	1	A0A7E5WZM0	A0A7E5WZM0	ATP synthase subunit alpha OS=Trichoplusia ni OX=7111 GN=LOC113507229 PE=3 SV=1	3	702.018	2104.04	40.1496	2.3
	High	[K].ADLEETGR.[V]	1	1	A0A7E5WZM0	A0A7E5WZM0	ATP synthase subunit alpha OS=Trichoplusia ni OX=7111 GN=LOC113507229 PE=3 SV=1	2	445.714	890.421	15.6099	2.02	2.13349e+07
	High	[R].QmSLLLR.[R]	1	1	A0A7E5WZM0	A0A7E5WZM0	ATP synthase subunit alpha OS=Trichoplusia ni OX=7111 GN=LOC113507229 PE=3 SV=1	2	438.752	876.497	23.6365	1.48	2.21423e+07
	High	[K].LELAQYR.[E]	1	1	A0A7E5WZM0	A0A7E5WZM0	ATP synthase subunit alpha OS=Trichoplusia ni OX=7111 GN=LOC113507229 PE=3 SV=1	2	446.748	892.489	24.1246	1.68	4.26885e+07
High	A0A7E5WD39	UTP--glucose-1-phosphate uridylyltransferase OS=Trichoplusia ni OX=7111 GN=LOC113501660 PE=3 SV=1	FALSE	TRUE	FALSE	15.739	7	8	7	3.48559e+07	20.1
	Confidence	Annotated Sequence	# Protein Groups	# Proteins	Master Protein Accessions	Protein Accessions	Protein Descriptions	Charge	m/z [Da]	MH+ [Da]	RT [min]	XCorr	Area
	High	[K].LPEGAVIDYTSLTTPTTDNVHHmLDK.[L]	1	4	A0A7E5WD39	A0A7E5WD98; A0A7E5WD39; A0A7E5WDX8; A0A7E5WD97	UTP--glucose-1-phosphate uridylyltransferase OS=Trichoplusia ni OX=7111 GN=LOC113501660 PE=3 SV=1; UTP--glucose-1-phosphate uridylyltransferase OS=Trichoplusia ni OX=7111 GN=LOC113501660 PE=3 SV=1; UTP--glucose-1-phosphate uridylyltransferase OS=Trichoplusia ni OX=7111 GN=LOC113501660 PE=3 SV=1; UTP--glucose-1-phosphate uridylyltransferase OS=Trichoplusia ni OX=7111 GN=LOC113501660 PE=3 SV=1	4	721.857	2884.41	32.4886	3.79	7.48621e+06
	High	[K].FFNTNNLWAK.[L]	1	4	A0A7E5WD39	A0A7E5WD98; A0A7E5WD39; A0A7E5WDX8; A0A7E5WD97	UTP--glucose-1-phosphate uridylyltransferase OS=Trichoplusia ni OX=7111 GN=LOC113501660 PE=3 SV=1; UTP--glucose-1-phosphate uridylyltransferase OS=Trichoplusia ni OX=7111 GN=LOC113501660 PE=3 SV=1; UTP--glucose-1-phosphate uridylyltransferase OS=Trichoplusia ni OX=7111 GN=LOC113501660 PE=3 SV=1; UTP--glucose-1-phosphate uridylyltransferase OS=Trichoplusia ni OX=7111 GN=LOC113501660 PE=3 SV=1	2	627.818	1254.63	34.1515	2.89	1.4873e+07
	High	[R].LEVELDR.[L]	1	4	A0A7E5WD39	A0A7E5WD98; A0A7E5WD39; A0A7E5WDX8; A0A7E5WD97	UTP--glucose-1-phosphate uridylyltransferase OS=Trichoplusia ni OX=7111 GN=LOC113501660 PE=3 SV=1; UTP--glucose-1-phosphate uridylyltransferase OS=Trichoplusia ni OX=7111 GN=LOC113501660 PE=3 SV=1; UTP--glucose-1-phosphate uridylyltransferase OS=Trichoplusia ni OX=7111 GN=LOC113501660 PE=3 SV=1; UTP--glucose-1-phosphate uridylyltransferase OS=Trichoplusia ni OX=7111 GN=LOC113501660 PE=3 SV=1	2	437.238	873.468	24.5145	1.83	2.71046e+07
	High	[R].LLEIAQVPK.[E]	1	4	A0A7E5WD39	A0A7E5WD98; A0A7E5WD39; A0A7E5WDX8; A0A7E5WD97	UTP--glucose-1-phosphate uridylyltransferase OS=Trichoplusia ni OX=7111 GN=LOC113501660 PE=3 SV=1; UTP--glucose-1-phosphate uridylyltransferase OS=Trichoplusia ni OX=7111 GN=LOC113501660 PE=3 SV=1; UTP--glucose-1-phosphate uridylyltransferase OS=Trichoplusia ni OX=7111 GN=LOC113501660 PE=3 SV=1; UTP--glucose-1-phosphate uridylyltransferase OS=Trichoplusia ni OX=7111 GN=LOC113501660 PE=3 SV=1	2	505.816	1010.62	29.1724	2.64	4.80168e+07
	High	[K].GTVIIIANHGDR.[I]	1	4	A0A7E5WD39	A0A7E5WD98; A0A7E5WD39; A0A7E5WDX8; A0A7E5WD97	UTP--glucose-1-phosphate uridylyltransferase OS=Trichoplusia ni OX=7111 GN=LOC113501660 PE=3 SV=1; UTP--glucose-1-phosphate uridylyltransferase OS=Trichoplusia ni OX=7111 GN=LOC113501660 PE=3 SV=1; UTP--glucose-1-phosphate uridylyltransferase OS=Trichoplusia ni OX=7111 GN=LOC113501660 PE=3 SV=1; UTP--glucose-1-phosphate uridylyltransferase OS=Trichoplusia ni OX=7111 GN=LOC113501660 PE=3 SV=1	3	422.57	1265.7	20.3292	2.41	1.24644e+07
	High	[K].GTVIIIANHGDR.[I]	1	4	A0A7E5WD39	A0A7E5WD98; A0A7E5WD39; A0A7E5WDX8; A0A7E5WD97	UTP--glucose-1-phosphate uridylyltransferase OS=Trichoplusia ni OX=7111 GN=LOC113501660 PE=3 SV=1; UTP--glucose-1-phosphate uridylyltransferase OS=Trichoplusia ni OX=7111 GN=LOC113501660 PE=3 SV=1; UTP--glucose-1-phosphate uridylyltransferase OS=Trichoplusia ni OX=7111 GN=LOC113501660 PE=3 SV=1; UTP--glucose-1-phosphate uridylyltransferase OS=Trichoplusia ni OX=7111 GN=LOC113501660 PE=3 SV=1	2	633.352	1265.7	20.3493	2.3	8.63984e+06
	High	[K].GGTLIQYEDK.[L]	1	4	A0A7E5WD39	A0A7E5WD98; A0A7E5WD39; A0A7E5WDX8; A0A7E5WD97	UTP--glucose-1-phosphate uridylyltransferase OS=Trichoplusia ni OX=7111 GN=LOC113501660 PE=3 SV=1; UTP--glucose-1-phosphate uridylyltransferase OS=Trichoplusia ni OX=7111 GN=LOC113501660 PE=3 SV=1; UTP--glucose-1-phosphate uridylyltransferase OS=Trichoplusia ni OX=7111 GN=LOC113501660 PE=3 SV=1; UTP--glucose-1-phosphate uridylyltransferase OS=Trichoplusia ni OX=7111 GN=LOC113501660 PE=3 SV=1	2	562.286	1123.56	23.4949	2.35	2.94463e+07
	High	[K].LGDNHFAK.[V]	1	4	A0A7E5WD39	A0A7E5WD98; A0A7E5WD39; A0A7E5WDX8; A0A7E5WD97	UTP--glucose-1-phosphate uridylyltransferase OS=Trichoplusia ni OX=7111 GN=LOC113501660 PE=3 SV=1; UTP--glucose-1-phosphate uridylyltransferase OS=Trichoplusia ni OX=7111 GN=LOC113501660 PE=3 SV=1; UTP--glucose-1-phosphate uridylyltransferase OS=Trichoplusia ni OX=7111 GN=LOC113501660 PE=3 SV=1; UTP--glucose-1-phosphate uridylyltransferase OS=Trichoplusia ni OX=7111 GN=LOC113501660 PE=3 SV=1	2	451.23	901.453	13.9535	1.88	3.61008e+06
High	A0A7E5VSR9	Probable methylmalonate-semialdehyde dehydrogenase [acylating], mitochondrial OS=Trichoplusia ni OX=7111 GN=LOC113496236 PE=3 SV=1	FALSE	TRUE	FALSE	21.2644	10	10	10	3.23782e+07	25.21
	Confidence	Annotated Sequence	# Protein Groups	# Proteins	Master Protein Accessions	Protein Accessions	Protein Descriptions	Charge	m/z [Da]	MH+ [Da]	RT [min]	XCorr	Area
	High	[K].mINSNPYGNGTAIFTTNGATAR.[K]	1	1	A0A7E5VSR9	A0A7E5VSR9	Probable methylmalonate-semialdehyde dehydrogenase [acylating], mitochondrial OS=Trichoplusia ni OX=7111 GN=LOC113496236 PE=3 SV=1	3	763.03	2287.08	31.7756	4.11	1.43196e+06
	High	[R].VPEATKDELNAALESAK.[N]	1	1	A0A7E5VSR9	A0A7E5VSR9	Probable methylmalonate-semialdehyde dehydrogenase [acylating], mitochondrial OS=Trichoplusia ni OX=7111 GN=LOC113496236 PE=3 SV=1	3	595.98	1785.92	28.6804	2.49	4.44663e+07
	High	[K].QGIDFFTELK.[T]	1	1	A0A7E5VSR9	A0A7E5VSR9	Probable methylmalonate-semialdehyde dehydrogenase [acylating], mitochondrial OS=Trichoplusia ni OX=7111 GN=LOC113496236 PE=3 SV=1	2	599.312	1197.62	39.4449	2.43	8.6125e+06
	High	[K].AVSFVGGDAAGK.[H]	1	1	A0A7E5VSR9	A0A7E5VSR9	Probable methylmalonate-semialdehyde dehydrogenase [acylating], mitochondrial OS=Trichoplusia ni OX=7111 GN=LOC113496236 PE=3 SV=1	2	539.78	1078.55	22.2788	2.93	2.43008e+07
	High	[R].GSFLGTNHFcGK.[Q]	1	1	A0A7E5VSR9	A0A7E5VSR9	Probable methylmalonate-semialdehyde dehydrogenase [acylating], mitochondrial OS=Trichoplusia ni OX=7111 GN=LOC113496236 PE=3 SV=1	3	442.208	1324.61	22.8362	2.37	1.37161e+06
	High	[K].TLADAEGDVLR.[G]	1	1	A0A7E5VSR9	A0A7E5VSR9	Probable methylmalonate-semialdehyde dehydrogenase [acylating], mitochondrial OS=Trichoplusia ni OX=7111 GN=LOC113496236 PE=3 SV=1	2	580.301	1159.6	27.7019	2.32	2.83675e+07
	High	[K].DELNAALESAK.[N]	1	1	A0A7E5VSR9	A0A7E5VSR9	Probable methylmalonate-semialdehyde dehydrogenase [acylating], mitochondrial OS=Trichoplusia ni OX=7111 GN=LOC113496236 PE=3 SV=1	2	580.794	1160.58	28.4375	2.03
	High	[K].NHGVImPDANK.[E]	1	1	A0A7E5VSR9	A0A7E5VSR9	Probable methylmalonate-semialdehyde dehydrogenase [acylating], mitochondrial OS=Trichoplusia ni OX=7111 GN=LOC113496236 PE=3 SV=1	2	606.296	1211.58	13.3325	2.7	2.41888e+06
	High	[K].TVVSFWR.[Q]	1	1	A0A7E5VSR9	A0A7E5VSR9	Probable methylmalonate-semialdehyde dehydrogenase [acylating], mitochondrial OS=Trichoplusia ni OX=7111 GN=LOC113496236 PE=3 SV=1	2	447.745	894.483	31.2449	1.78	5.95557e+06
	Medium	[K].EWIPDLVAR.[A]	1	1	A0A7E5VSR9	A0A7E5VSR9	Probable methylmalonate-semialdehyde dehydrogenase [acylating], mitochondrial OS=Trichoplusia ni OX=7111 GN=LOC113496236 PE=3 SV=1	2	549.801	1098.59	36.8067	2.06	1.69724e+07
High	A0A7E5WX33	ATP synthase subunit beta OS=Trichoplusia ni OX=7111 GN=LOC113506412 PE=3 SV=1	FALSE	TRUE	FALSE	14.9515	6	7	6	1.89783e+07	19.8
	Confidence	Annotated Sequence	# Protein Groups	# Proteins	Master Protein Accessions	Protein Accessions	Protein Descriptions	Charge	m/z [Da]	MH+ [Da]	RT [min]	XCorr	Area
	High	[K].VVDLLAPYAK.[G]	1	2	A0A7E5WX33	A0A7E5WX33; A0A7E5WB57	ATP synthase subunit beta OS=Trichoplusia ni OX=7111 GN=LOC113506412 PE=3 SV=1; ATP synthase subunit beta OS=Trichoplusia ni OX=7111 GN=LOC113500738 PE=3 SV=1	2	544.821	1088.64	33.3262	2.2	1.95649e+07
	High	[R].LVLEVAQHLGENTVR.[T]	1	2	A0A7E5WX33	A0A7E5WX33; A0A7E5WB57	ATP synthase subunit beta OS=Trichoplusia ni OX=7111 GN=LOC113506412 PE=3 SV=1; ATP synthase subunit beta OS=Trichoplusia ni OX=7111 GN=LOC113500738 PE=3 SV=1	3	559.981	1677.93	30.6499	3.09	5.21448e+06
	High	[R].LVLEVAQHLGENTVR.[T]	1	2	A0A7E5WX33	A0A7E5WX33; A0A7E5WB57	ATP synthase subunit beta OS=Trichoplusia ni OX=7111 GN=LOC113506412 PE=3 SV=1; ATP synthase subunit beta OS=Trichoplusia ni OX=7111 GN=LOC113500738 PE=3 SV=1	2	839.469	1677.93	30.6453	3.38	1.46875e+06
	High	[K].IGLFGGAGVGK.[T]	1	3	A0A7E5WX33	A0A7E5WX33; A0A7E5WVQ8; A0A7E5WB57	ATP synthase subunit beta OS=Trichoplusia ni OX=7111 GN=LOC113506412 PE=3 SV=1; ATP synthase subunit beta OS=Trichoplusia ni OX=7111 GN=LOC113505642 PE=3 SV=1; ATP synthase subunit beta OS=Trichoplusia ni OX=7111 GN=LOC113500738 PE=3 SV=1	2	488.285	975.562	30.1271	2.34	2.44702e+07
	High	[R].FTQAGSEVSALLGR.[I]	1	3	A0A7E5WX33	A0A7E5WX33; A0A7E5WVQ8; A0A7E5WB57	ATP synthase subunit beta OS=Trichoplusia ni OX=7111 GN=LOC113506412 PE=3 SV=1; ATP synthase subunit beta OS=Trichoplusia ni OX=7111 GN=LOC113505642 PE=3 SV=1; ATP synthase subunit beta OS=Trichoplusia ni OX=7111 GN=LOC113500738 PE=3 SV=1	2	718.381	1435.75	34.35	3.14	1.29e+07
	High	[K].AHGGYSVFAGVGER.[T]	1	2	A0A7E5WX33	A0A7E5WX33; A0A7E5WB57	ATP synthase subunit beta OS=Trichoplusia ni OX=7111 GN=LOC113506412 PE=3 SV=1; ATP synthase subunit beta OS=Trichoplusia ni OX=7111 GN=LOC113500738 PE=3 SV=1	3	469.565	1406.68	24.5764	3.03	3.7284e+06
	High	[R].VALTGLTVAEYFR.[D]	1	2	A0A7E5WX33	A0A7E5WX33; A0A7E5WB57	ATP synthase subunit beta OS=Trichoplusia ni OX=7111 GN=LOC113506412 PE=3 SV=1; ATP synthase subunit beta OS=Trichoplusia ni OX=7111 GN=LOC113500738 PE=3 SV=1	2	720.399	1439.79	40.8329	2.6	1.73741e+06
High	A0A7E5WMP6	Aldehyde dehydrogenase, mitochondrial OS=Trichoplusia ni OX=7111 GN=LOC113503573 PE=3 SV=1	FALSE	TRUE	FALSE	31.6306	13	15	13	1.83379e+07	41.46
	Confidence	Annotated Sequence	# Protein Groups	# Proteins	Master Protein Accessions	Protein Accessions	Protein Descriptions	Charge	m/z [Da]	MH+ [Da]	RT [min]	XCorr	Area
	High	[K].TENPANGQVIAEVQEAGK.[A]	1	1	A0A7E5WMP6	A0A7E5WMP6	Aldehyde dehydrogenase, mitochondrial OS=Trichoplusia ni OX=7111 GN=LOC113503573 PE=3 SV=1	2	927.964	1854.92	28.8488	3.43	9.73722e+06
	High	[K].TENPANGQVIAEVQEAGK.[A]	1	1	A0A7E5WMP6	A0A7E5WMP6	Aldehyde dehydrogenase, mitochondrial OS=Trichoplusia ni OX=7111 GN=LOC113503573 PE=3 SV=1	3	618.979	1854.92	28.8838	2.8	3.36638e+06
	High	[R].VVGDPFKPETEQGPQIDAEQYNR.[I]	1	1	A0A7E5WMP6	A0A7E5WMP6	Aldehyde dehydrogenase, mitochondrial OS=Trichoplusia ni OX=7111 GN=LOC113503573 PE=3 SV=1	3	873.09	2617.25	30.5087	4.23	2.07771e+07
	High	[K].AGDVGYYVQPTVFSDVK.[D]	1	1	A0A7E5WMP6	A0A7E5WMP6	Aldehyde dehydrogenase, mitochondrial OS=Trichoplusia ni OX=7111 GN=LOC113503573 PE=3 SV=1	2	922.956	1844.9	36.4886	2.68	1.33021e+06
	High	[R].ANTSEYGLAAAVFTK.[D]	1	1	A0A7E5WMP6	A0A7E5WMP6	Aldehyde dehydrogenase, mitochondrial OS=Trichoplusia ni OX=7111 GN=LOC113503573 PE=3 SV=1	2	771.895	1542.78	35.1929	3.29	1.1204e+07
	High	[R].ANTSEYGLAAAVFTK.[D]	1	1	A0A7E5WMP6	A0A7E5WMP6	Aldehyde dehydrogenase, mitochondrial OS=Trichoplusia ni OX=7111 GN=LOC113503573 PE=3 SV=1	3	514.932	1542.78	35.2776	2.77	923533
	High	[K].SHGLVLPSDGK.[Y]	1	1	A0A7E5WMP6	A0A7E5WMP6	Aldehyde dehydrogenase, mitochondrial OS=Trichoplusia ni OX=7111 GN=LOC113503573 PE=3 SV=1	2	555.302	1109.6	19.5428	3.15	2.48989e+06
	High	[K].IAFTGSTEVGK.[L]	1	1	A0A7E5WMP6	A0A7E5WMP6	Aldehyde dehydrogenase, mitochondrial OS=Trichoplusia ni OX=7111 GN=LOC113503573 PE=3 SV=1	2	555.295	1109.58	23.9213	3.1	1.36565e+07
	High	[R].ILGLIESGK.[R]	1	1	A0A7E5WMP6	A0A7E5WMP6	Aldehyde dehydrogenase, mitochondrial OS=Trichoplusia ni OX=7111 GN=LOC113503573 PE=3 SV=1	2	465.287	929.566	29.0285	2.14	1.14058e+07
	High	[R].TNYIVQR.[L]	1	1	A0A7E5WMP6	A0A7E5WMP6	Aldehyde dehydrogenase, mitochondrial OS=Trichoplusia ni OX=7111 GN=LOC113503573 PE=3 SV=1	2	447.245	893.484	18.9735	1.8	9.72038e+06
	High	[R].LADLVER.[D]	1	1	A0A7E5WMP6	A0A7E5WMP6	Aldehyde dehydrogenase, mitochondrial OS=Trichoplusia ni OX=7111 GN=LOC113503573 PE=3 SV=1	2	408.235	815.463	21.9543	1.99	1.42432e+07
	High	[K].SPNIIFADTDLEK.[A]	1	1	A0A7E5WMP6	A0A7E5WMP6	Aldehyde dehydrogenase, mitochondrial OS=Trichoplusia ni OX=7111 GN=LOC113503573 PE=3 SV=1	2	731.875	1462.74	34.8999	3.19	1.62923e+07
	High	[R].ENGPYGINNYTEVK.[A]	1	1	A0A7E5WMP6	A0A7E5WMP6	Aldehyde dehydrogenase, mitochondrial OS=Trichoplusia ni OX=7111 GN=LOC113503573 PE=3 SV=1	2	799.378	1597.75	28.3054	3.07	1.37078e+07
	High	[K].FVELAAER.[A]	1	1	A0A7E5WMP6	A0A7E5WMP6	Aldehyde dehydrogenase, mitochondrial OS=Trichoplusia ni OX=7111 GN=LOC113503573 PE=3 SV=1	2	467.753	934.499	23.9833	1.72	1.79441e+07
High	P35908	Keratin, type II cytoskeletal 2 epidermal OS=Homo sapiens GN=KRT2 PE=1 SV=2	TRUE	FALSE	FALSE	30.3599	16	16	12	1.70199e+07	39.1
	Confidence	Annotated Sequence	# Protein Groups	# Proteins	Master Protein Accessions	Protein Accessions	Protein Descriptions	Charge	m/z [Da]	MH+ [Da]	RT [min]	XCorr	Area
	High	[K].VDLLNQEIEFLK.[V]	1	1	P35908	P35908	Keratin, type II cytoskeletal 2 epidermal OS=Homo sapiens GN=KRT2 PE=1 SV=2	2	730.904	1460.8	42.5497	2.84	2.46617e+06
	High	[R].NLDLDSIIAEVK.[A]	3	8	P35908; P04259; P13647	Q5XKE5; P35908; P04259; P02538; O95678; Q8VED5; P48668; P13647	Keratin, type II cytoskeletal 79 OS=Homo sapiens GN=KRT79 PE=1 SV=2; Keratin, type II cytoskeletal 2 epidermal OS=Homo sapiens GN=KRT2 PE=1 SV=2; Keratin, type II cytoskeletal 6B OS=Homo sapiens GN=KRT6B PE=1 SV=5; Keratin, type II cytoskeletal 6A OS=Homo sapiens GN=KRT6A PE=1 SV=3; Keratin, type II cytoskeletal 75 OS=Homo sapiens GN=KRT75 PE=1 SV=2; Keratin, type II cytoskeletal 79 OS=Mus muscul…	2	665.367	1329.73	43.6741	2.17	3.34801e+06
	High	[R].HGGGGGGFGGGGFGSR.[S]	1	1	P35908	P35908	Keratin, type II cytoskeletal 2 epidermal OS=Homo sapiens GN=KRT2 PE=1 SV=2	3	440.865	1320.58	17.9252	2.98	4.33408e+06
	High	[K].VDPEIQNVK.[SA]	1	3	P35908	Q3TTY5; P35908; E1B991	Keratin, type II cytoskeletal 2 epidermal OS=Mus musculus GN=Krt2 PE=1 SV=1; Keratin, type II cytoskeletal 2 epidermal OS=Homo sapiens GN=KRT2 PE=1 SV=2; Uncharacterized protein OS=Bos taurus GN=KRT2 PE=3 SV=2	2	521.282	1041.56	20.3694	1.98	20904662
	High	[R].FLEQQNQVLQTK.[W]	2	7	P35908; P04264	Q7Z794; P35908; Q9R0H5; Q6NXH9; P04264; Q6IFZ6; E1B991	Keratin, type II cytoskeletal 1b OS=Homo sapiens GN=KRT77 PE=2 SV=3; Keratin, type II cytoskeletal 2 epidermal OS=Homo sapiens GN=KRT2 PE=1 SV=2; Keratin, type II cytoskeletal 71 OS=Mus musculus GN=Krt71 PE=1 SV=1; Keratin, type II cytoskeletal 73 OS=Mus musculus GN=Krt73 PE=1 SV=1; Keratin, type II cytoskeletal 1 OS=Homo sapiens GN=KRT1 PE=1 SV=6; Keratin, type II cytoskeletal 1b OS=Mus musculus…	2	738.397	1475.79	25.9902	2.59	1.91523e+08
	High	[K].NVQDAIADAEQR.[G]	1	1	P35908	P35908	Keratin, type II cytoskeletal 2 epidermal OS=Homo sapiens GN=KRT2 PE=1 SV=2	2	665.323	1329.64	26.8738	3.13	1.83417e+07
	High	[K].GGSISGGGYGSGGGK.[H]	1	1	P35908	P35908	Keratin, type II cytoskeletal 2 epidermal OS=Homo sapiens GN=KRT2 PE=1 SV=2	2	599.279	1197.55	15.2428	2.4	5.45683e+06
	High	[R].TSQNSELNNmQDLVEDYKK.[K]	1	1	P35908	P35908	Keratin, type II cytoskeletal 2 epidermal OS=Homo sapiens GN=KRT2 PE=1 SV=2	3	758.017	2272.04	24.5011	3.36	4.21403e+06
	High	[R].YLDGLTAER.[T]	1	1	P35908	P35908	Keratin, type II cytoskeletal 2 epidermal OS=Homo sapiens GN=KRT2 PE=1 SV=2	2	519.267	1037.53	26.3597	1.9
	High	[KR].AQYEEIAQR.[S]	2	7	P35908; P04259	P35908; P04259; P02538; Q01546; P48668; P19013; E1B991	Keratin, type II cytoskeletal 2 epidermal OS=Homo sapiens GN=KRT2 PE=1 SV=2; Keratin, type II cytoskeletal 6B OS=Homo sapiens GN=KRT6B PE=1 SV=5; Keratin, type II cytoskeletal 6A OS=Homo sapiens GN=KRT6A PE=1 SV=3; Keratin, type II cytoskeletal 2 oral OS=Homo sapiens GN=KRT76 PE=1 SV=2; Keratin, type II cytoskeletal 6C OS=Homo sapiens GN=KRT6C PE=1 SV=3; Keratin, type II cytoskeletal 4 OS=Homo sa…	2	554.275	1107.54	19.9926	1.88	2.83953e+07
	High	[R].TAAENDFVTLKK.[D]	1	1	P35908	P35908	Keratin, type II cytoskeletal 2 epidermal OS=Homo sapiens GN=KRT2 PE=1 SV=2	2	668.859	1336.71	21.8214	2.53	2.15334e+06
	High	[R].SLVGLGGTK.[S]	1	1	P35908	P35908	Keratin, type II cytoskeletal 2 epidermal OS=Homo sapiens GN=KRT2 PE=1 SV=2	2	416.25	831.493	22.0011	2.13	1.18134e+07
	High	[R].DYQELmNVK.[L]	1	4	P35908	Q5XKE5; P35908; Q01546; P12035	Keratin, type II cytoskeletal 79 OS=Homo sapiens GN=KRT79 PE=1 SV=2; Keratin, type II cytoskeletal 2 epidermal OS=Homo sapiens GN=KRT2 PE=1 SV=2; Keratin, type II cytoskeletal 2 oral OS=Homo sapiens GN=KRT76 PE=1 SV=2; Keratin, type II cytoskeletal 3 OS=Homo sapiens GN=KRT3 PE=1 SV=3	2	578.272	1155.54	24.0616	2.13	1.09224e+07
	High	[R].LQGEIAHVK.[K]	1	1	P35908	P35908	Keratin, type II cytoskeletal 2 epidermal OS=Homo sapiens GN=KRT2 PE=1 SV=2	2	497.787	994.568	15.295	1.64	3.53285e+06
	High	[K].FASFIDK.[V]	3	28	P35908; P04259; P13647	Q5XKE5; P08729; Q7Z794; Q7RTS7; Q3TTY5; P35908; Q9R0H5; Q6NXH9; P04259; P02538; Q01546; O95678; P50446; Q6IME9; Q8BGZ7; Q8VED5; Q5XQN5; P48668; P07744; Q9NSB2; P12035; Q6IFZ6; Q9DCV7; Q3SY84; P19013; P05787; Q922U2; P13647	Keratin, type II cytoskeletal 79 OS=Homo sapiens GN=KRT79 PE=1 SV=2; Keratin, type II cytoskeletal 7 OS=Homo sapiens GN=KRT7 PE=1 SV=5; Keratin, type II cytoskeletal 1b OS=Homo sapiens GN=KRT77 PE=2 SV=3; Keratin, type II cytoskeletal 74 OS=Homo sapiens GN=KRT74 PE=1 SV=2; Keratin, type II cytoskeletal 2 epidermal OS=Mus musculus GN=Krt2 PE=1 SV=1; Keratin, type II cytoskeletal 2 epidermal OS=Hom…	2	414.219	827.43	26.2003	2.03
	Medium	[R].GGSGGGGSISGGGYGSGGGSGGR.[Y]	1	1	P35908	P35908	Keratin, type II cytoskeletal 2 epidermal OS=Homo sapiens GN=KRT2 PE=1 SV=2	2	871.378	1741.75	17.0127	3.42	107460
High	A0A7E5VKQ5	Xaa-Pro aminopeptidase 3 OS=Trichoplusia ni OX=7111 GN=LOC113494580 PE=4 SV=1	FALSE	TRUE	FALSE	21.499	8	10	8	1.6582e+07	28.07
	Confidence	Annotated Sequence	# Protein Groups	# Proteins	Master Protein Accessions	Protein Accessions	Protein Descriptions	Charge	m/z [Da]	MH+ [Da]	RT [min]	XCorr	Area
	High	[K].QGGAEHLAFPPVVAGGPR.[A]	1	1	A0A7E5VKQ5	A0A7E5VKQ5	Xaa-Pro aminopeptidase 3 OS=Trichoplusia ni OX=7111 GN=LOC113494580 PE=4 SV=1	3	587.315	1759.93	29.9354	2.91
	High	[K].HLSGQELVGR.[A]	1	1	A0A7E5VKQ5	A0A7E5VKQ5	Xaa-Pro aminopeptidase 3 OS=Trichoplusia ni OX=7111 GN=LOC113494580 PE=4 SV=1	2	548.299	1095.59	18.1318	2.95	1.92295e+07
	High	[K].FGNVLNNLTSHK.[T]	1	1	A0A7E5VKQ5	A0A7E5VKQ5	Xaa-Pro aminopeptidase 3 OS=Trichoplusia ni OX=7111 GN=LOC113494580 PE=4 SV=1	3	448.573	1343.7	26.1355	2.54	16184087
	High	[K].LVGEAVNmHNTHIIVIPAAR.[K]	1	1	A0A7E5VKQ5	A0A7E5VKQ5	Xaa-Pro aminopeptidase 3 OS=Trichoplusia ni OX=7111 GN=LOC113494580 PE=4 SV=1	4	543.55	2171.18	26.4774	2.98	1.0205e+07
	High	[R].ATLNGNVSLADPK.[R]	1	1	A0A7E5VKQ5	A0A7E5VKQ5	Xaa-Pro aminopeptidase 3 OS=Trichoplusia ni OX=7111 GN=LOC113494580 PE=4 SV=1	2	650.349	1299.69	24.5888	1.85	14064274
	High	[R].ATHIHYVANNQK.[L]	1	1	A0A7E5VKQ5	A0A7E5VKQ5	Xaa-Pro aminopeptidase 3 OS=Trichoplusia ni OX=7111 GN=LOC113494580 PE=4 SV=1	2	698.362	1395.72	11.4879	2.98	261100
	High	[R].ATHIHYVANNQK.[L]	1	1	A0A7E5VKQ5	A0A7E5VKQ5	Xaa-Pro aminopeptidase 3 OS=Trichoplusia ni OX=7111 GN=LOC113494580 PE=4 SV=1	3	465.909	1395.71	11.4443	3.64	7.29275e+06
	High	[K].LTENEmLLVDSGcQR.[W]	1	1	A0A7E5VKQ5	A0A7E5VKQ5	Xaa-Pro aminopeptidase 3 OS=Trichoplusia ni OX=7111 GN=LOC113494580 PE=4 SV=1	2	890.914	1780.82	28.0154	2.93	2.19356e+06
	High	[K].SAAEVELmK.[A]	1	1	A0A7E5VKQ5	A0A7E5VKQ5	Xaa-Pro aminopeptidase 3 OS=Trichoplusia ni OX=7111 GN=LOC113494580 PE=4 SV=1	2	497.25	993.492	18.564	2.39	1.43324e+07
	High	[K].QGGAEHLAFPPVVAGGPR.[A]	1	1	A0A7E5VKQ5	A0A7E5VKQ5	Xaa-Pro aminopeptidase 3 OS=Trichoplusia ni OX=7111 GN=LOC113494580 PE=4 SV=1	3	587.312	1759.92	29.2883	2.9	6.91975e+06
High	A0A7E5WKS7	Protein lingerer-like OS=Trichoplusia ni OX=7111 GN=LOC113503108 PE=4 SV=1	FALSE	TRUE	FALSE	6.3358	4	4	4	1.43321e+07	9.07
	Confidence	Annotated Sequence	# Protein Groups	# Proteins	Master Protein Accessions	Protein Accessions	Protein Descriptions	Charge	m/z [Da]	MH+ [Da]	RT [min]	XCorr	Area
	High	[R].HDNSVYTSNYGVYSSSDITSQR.[K]	1	1	A0A7E5WKS7	A0A7E5WKS7	Protein lingerer-like OS=Trichoplusia ni OX=7111 GN=LOC113503108 PE=4 SV=1	3	827.37	2480.1	28.047	3.06	5.93541e+06
	High	[K].VSSYSGAAYEPEYK.[A]	1	1	A0A7E5WKS7	A0A7E5WKS7	Protein lingerer-like OS=Trichoplusia ni OX=7111 GN=LOC113503108 PE=4 SV=1	2	775.854	1550.7	24.553	3.22	1.26016e+07
	High	[R].DATFGLSAGER.[F]	1	1	A0A7E5WKS7	A0A7E5WKS7	Protein lingerer-like OS=Trichoplusia ni OX=7111 GN=LOC113503108 PE=4 SV=1	2	562.273	1123.54	27.8999	2.79	2.40902e+07
	High	[K].AAGPYSHAAQPPK.[Q]	1	1	A0A7E5WKS7	A0A7E5WKS7	Protein lingerer-like OS=Trichoplusia ni OX=7111 GN=LOC113503108 PE=4 SV=1	3	432.223	1294.65	14.5989	1.95	6.30461e+06
High	A0A7E5WV00	serine--tRNA ligase OS=Trichoplusia ni OX=7111 GN=LOC113505465 PE=3 SV=1	FALSE	TRUE	FALSE	7.69231	3	3	3	1.38842e+07	7.39
	Confidence	Annotated Sequence	# Protein Groups	# Proteins	Master Protein Accessions	Protein Accessions	Protein Descriptions	Charge	m/z [Da]	MH+ [Da]	RT [min]	XCorr	Area
	High	[R].ILIDEAITK.[N]	1	1	A0A7E5WV00	A0A7E5WV00	serine--tRNA ligase OS=Trichoplusia ni OX=7111 GN=LOC113505465 PE=3 SV=1	2	508.305	1015.6	29.245	1.89	2.18398e+07
	High	[R].ELVScSNcLEYQAR.[R]	1	1	A0A7E5WV00	A0A7E5WV00	serine--tRNA ligase OS=Trichoplusia ni OX=7111 GN=LOC113505465 PE=3 SV=1	2	864.889	1728.77	27.2962	2.59	971342
	High	[R].VVNIVSGALNHAAAK.[K]	1	1	A0A7E5WV00	A0A7E5WV00	serine--tRNA ligase OS=Trichoplusia ni OX=7111 GN=LOC113505465 PE=3 SV=1	3	488.616	1463.83	25.2023	2.91	1.88415e+07
High	A0A7E5WP28	T-complex protein 1 subunit epsilon OS=Trichoplusia ni OX=7111 GN=LOC113504153 PE=3 SV=1	FALSE	TRUE	FALSE	15.6827	9	10	9	1.22555e+07	18.46
	Confidence	Annotated Sequence	# Protein Groups	# Proteins	Master Protein Accessions	Protein Accessions	Protein Descriptions	Charge	m/z [Da]	MH+ [Da]	RT [min]	XCorr	Area
	High	[K].LASLDQYAYR.[A]	1	1	A0A7E5WP28	A0A7E5WP28	T-complex protein 1 subunit epsilon OS=Trichoplusia ni OX=7111 GN=LOC113504153 PE=3 SV=1	2	600.307	1199.61	28.6041	2.67	1.49807e+07
	High	[K].LGScGLVR.[E]	1	1	A0A7E5WP28	A0A7E5WP28	T-complex protein 1 subunit epsilon OS=Trichoplusia ni OX=7111 GN=LOC113504153 PE=3 SV=1	2	431.234	861.461	19.6423	2.39	3.17304e+06
	High	[R].AVTLLmR.[G]	1	1	A0A7E5WP28	A0A7E5WP28	T-complex protein 1 subunit epsilon OS=Trichoplusia ni OX=7111 GN=LOC113504153 PE=3 SV=1	2	410.242	819.476	22.7649	1.54	3.20685e+06
	High	[K].LmVSPDGDVTVTNDGATILK.[L]	1	1	A0A7E5WP28	A0A7E5WP28	T-complex protein 1 subunit epsilon OS=Trichoplusia ni OX=7111 GN=LOC113504153 PE=3 SV=1	2	1031.53	2062.04	34.5902	3.2	321349
	High	[R].FEELTPDK.[L]	1	1	A0A7E5WP28	A0A7E5WP28	T-complex protein 1 subunit epsilon OS=Trichoplusia ni OX=7111 GN=LOC113504153 PE=3 SV=1	2	489.743	978.478	22.2784	2.1	1.14093e+07
	High	[R].LTGIDALK.[S]	1	1	A0A7E5WP28	A0A7E5WP28	T-complex protein 1 subunit epsilon OS=Trichoplusia ni OX=7111 GN=LOC113504153 PE=3 SV=1	2	415.752	830.497	25.6519	2.1	9.70125e+06
	High	[R].AVTLLMR.[G]	1	1	A0A7E5WP28	A0A7E5WP28	T-complex protein 1 subunit epsilon OS=Trichoplusia ni OX=7111 GN=LOC113504153 PE=3 SV=1	2	402.244	803.481	26.5847	2.08	1088559
	High	[K].FLEmVR.[R]	1	1	A0A7E5WP28	A0A7E5WP28	T-complex protein 1 subunit epsilon OS=Trichoplusia ni OX=7111 GN=LOC113504153 PE=3 SV=1	2	405.713	810.418	21.7862	1.41	6.87774e+06
	High	[K].LHVGSVEEYR.[E]	1	1	A0A7E5WP28	A0A7E5WP28	T-complex protein 1 subunit epsilon OS=Trichoplusia ni OX=7111 GN=LOC113504153 PE=3 SV=1	2	594.804	1188.6	20.7141	2.26	2.62154e+06
	Medium	[R].DVNFELIK.[V]	1	1	A0A7E5WP28	A0A7E5WP28	T-complex protein 1 subunit epsilon OS=Trichoplusia ni OX=7111 GN=LOC113504153 PE=3 SV=1	2	489.269	977.531	34.5473	1.66	1.03764e+07
High	A0A7E5VE87	Importin subunit alpha OS=Trichoplusia ni OX=7111 GN=LOC113493033 PE=3 SV=1	FALSE	TRUE	FALSE	10.4854	5	5	5	1.08685e+07	14.74
	Confidence	Annotated Sequence	# Protein Groups	# Proteins	Master Protein Accessions	Protein Accessions	Protein Descriptions	Charge	m/z [Da]	MH+ [Da]	RT [min]	XCorr	Area
	High	[K].EAAWAVSNLSISGTK.[E]	1	1	A0A7E5VE87	A0A7E5VE87	Importin subunit alpha OS=Trichoplusia ni OX=7111 GN=LOC113493033 PE=3 SV=1	2	767.402	1533.8	34.0148	3.69	3.31973e+06
	High	[R].NVPVSYSTDEDEIER.[T]	1	1	A0A7E5VE87	A0A7E5VE87	Importin subunit alpha OS=Trichoplusia ni OX=7111 GN=LOC113493033 PE=3 SV=1	2	876.9	1752.79	27.3509	3.79	9.20302e+06
	High	[R].RNEVTVELR.[K]	1	1	A0A7E5VE87	A0A7E5VE87	Importin subunit alpha OS=Trichoplusia ni OX=7111 GN=LOC113493033 PE=3 SV=1	2	558.312	1115.62	18.8528	3.03	3.41836e+06
	High	[K].IVDNLTK.[G]	1	1	A0A7E5VE87	A0A7E5VE87	Importin subunit alpha OS=Trichoplusia ni OX=7111 GN=LOC113493033 PE=3 SV=1	2	401.737	802.466	17.9053	2.45	1.29872e+07
	High	[R].TLASTDLK.[E]	1	1	A0A7E5VE87	A0A7E5VE87	Importin subunit alpha OS=Trichoplusia ni OX=7111 GN=LOC113493033 PE=3 SV=1	2	424.74	848.472	18.2733	1.77	1.04153e+07
High	A0A7E5WY07	26S proteasome regulatory subunit 4 OS=Trichoplusia ni OX=7111 GN=LOC113506737 PE=3 SV=1	FALSE	TRUE	FALSE	5.69476	2	2	2	1.052e+07	4.83
	Confidence	Annotated Sequence	# Protein Groups	# Proteins	Master Protein Accessions	Protein Accessions	Protein Descriptions	Charge	m/z [Da]	MH+ [Da]	RT [min]	XCorr	Area
	High	[R].IETLDPALIRPGR.[I]	1	2	A0A7E5WY07	A0A7E5WYK0; A0A7E5WY07	LOW QUALITY PROTEIN: 26S proteasome regulatory subunit 4-like OS=Trichoplusia ni OX=7111 GN=LOC113506702 PE=3 SV=1; 26S proteasome regulatory subunit 4 OS=Trichoplusia ni OX=7111 GN=LOC113506737 PE=3 SV=1	3	484.284	1450.84	29.3057	2.25	1.38549e+07
	High	[K].GVILYGPPGTGK.[T]	1	2	A0A7E5WY07	A0A7E5WYK0; A0A7E5WY07	LOW QUALITY PROTEIN: 26S proteasome regulatory subunit 4-like OS=Trichoplusia ni OX=7111 GN=LOC113506702 PE=3 SV=1; 26S proteasome regulatory subunit 4 OS=Trichoplusia ni OX=7111 GN=LOC113506737 PE=3 SV=1	2	579.83	1158.65	27.671	2.58	7.18502e+06
High	A0A7E5WJN2	T-complex protein 1 subunit gamma OS=Trichoplusia ni OX=7111 GN=LOC113503333 PE=3 SV=1	FALSE	TRUE	FALSE	20.1479	10	10	10	1.04599e+07	24.04
	Confidence	Annotated Sequence	# Protein Groups	# Proteins	Master Protein Accessions	Protein Accessions	Protein Descriptions	Charge	m/z [Da]	MH+ [Da]	RT [min]	XCorr	Area
	High	[R].AVAQALEIIPR.[T]	1	1	A0A7E5WJN2	A0A7E5WJN2	T-complex protein 1 subunit gamma OS=Trichoplusia ni OX=7111 GN=LOC113503333 PE=3 SV=1	2	590.857	1180.71	32.8297	3.12	1.0314e+07
	High	[K].TAVETAILLLR.[I]	1	1	A0A7E5WJN2	A0A7E5WJN2	T-complex protein 1 subunit gamma OS=Trichoplusia ni OX=7111 GN=LOC113503333 PE=3 SV=1	2	600.372	1199.74	39.6257	2.99	3.47763e+06
	High	[K].IGDEYFTFVTEcK.[N]	1	1	A0A7E5WJN2	A0A7E5WJN2	T-complex protein 1 subunit gamma OS=Trichoplusia ni OX=7111 GN=LOC113503333 PE=3 SV=1	2	804.866	1608.73	38.5607	2.21	419201
	High	[R].TLAQNcGANTIR.[T]	1	1	A0A7E5WJN2	A0A7E5WJN2	T-complex protein 1 subunit gamma OS=Trichoplusia ni OX=7111 GN=LOC113503333 PE=3 SV=1	2	659.831	1318.65	18.5581	3.26	2.36202e+06
	High	[R].LLQLEEEHVQR.[Q]	1	1	A0A7E5WJN2	A0A7E5WJN2	T-complex protein 1 subunit gamma OS=Trichoplusia ni OX=7111 GN=LOC113503333 PE=3 SV=1	3	465.253	1393.74	23.1208	3.19	1.16156e+07
	High	[R].TEELKESDVGTAAGK.[F]	1	1	A0A7E5WJN2	A0A7E5WJN2	T-complex protein 1 subunit gamma OS=Trichoplusia ni OX=7111 GN=LOC113503333 PE=3 SV=1	3	512.258	1534.76	18.1859	3.14	3.46182e+06
	High	[R].IVLLDcPLEYK.[K]	1	1	A0A7E5WJN2	A0A7E5WJN2	T-complex protein 1 subunit gamma OS=Trichoplusia ni OX=7111 GN=LOC113503333 PE=3 SV=1	2	681.871	1362.73	36.4545	2.3	4.35388e+06
	High	[K].DILNEIER.[N]	1	1	A0A7E5WJN2	A0A7E5WJN2	T-complex protein 1 subunit gamma OS=Trichoplusia ni OX=7111 GN=LOC113503333 PE=3 SV=1	2	501.267	1001.53	33.0539	2.06	9.45012e+06
	High	[K].NLVLSPR.[L]	1	1	A0A7E5WJN2	A0A7E5WJN2	T-complex protein 1 subunit gamma OS=Trichoplusia ni OX=7111 GN=LOC113503333 PE=3 SV=1	2	399.745	798.484	22.2883	1.46
High	A0A7E5VCG7	Serine/threonine-protein kinase ppk5 isoform X1 OS=Trichoplusia ni OX=7111 GN=LOC113492627 PE=4 SV=1	FALSE	TRUE	FALSE	5.22682	5	6	5	1.04156e+07	10.72
	Confidence	Annotated Sequence	# Protein Groups	# Proteins	Master Protein Accessions	Protein Accessions	Protein Descriptions	Charge	m/z [Da]	MH+ [Da]	RT [min]	XCorr	Area
	High	[R].YLQTNSEESR.[Q]	1	7	A0A7E5VCG7	A0A7E5VCI1; A0A7E5VCH4; A0A7E5VCG9; A0A7E5VCG7; A0A7E5VCL3; A0A7E5VCI6; A0A7E5VCH2	Serine/threonine-protein kinase ppk5 isoform X2 OS=Trichoplusia ni OX=7111 GN=LOC113492627 PE=4 SV=1; Serine/threonine-protein kinase Doa isoform X7 OS=Trichoplusia ni OX=7111 GN=LOC113492627 PE=3 SV=1; Cyclin-dependent kinase 11.1 isoform X3 OS=Trichoplusia ni OX=7111 GN=LOC113492627 PE=4 SV=1; Serine/threonine-protein kinase ppk5 isoform X1 OS=Trichoplusia ni OX=7111 GN=LOC113492627 PE=4 SV=1; …	2	613.787	1226.57	15.6866	2.26	5.73928e+06
	High	[R].LIDFGSATFDHEHHSTIVSTR.[H]	1	7	A0A7E5VCG7	A0A7E5VCI1; A0A7E5VCH4; A0A7E5VCG9; A0A7E5VCG7; A0A7E5VCL3; A0A7E5VCI6; A0A7E5VCH2	Serine/threonine-protein kinase ppk5 isoform X2 OS=Trichoplusia ni OX=7111 GN=LOC113492627 PE=4 SV=1; Serine/threonine-protein kinase Doa isoform X7 OS=Trichoplusia ni OX=7111 GN=LOC113492627 PE=3 SV=1; Cyclin-dependent kinase 11.1 isoform X3 OS=Trichoplusia ni OX=7111 GN=LOC113492627 PE=4 SV=1; Serine/threonine-protein kinase ppk5 isoform X1 OS=Trichoplusia ni OX=7111 GN=LOC113492627 PE=4 SV=1; …	4	593.293	2370.15	27.3216	2.69	3.79828e+06
	High	[R].QLFDLIAR.[M]	1	7	A0A7E5VCG7	A0A7E5VCI1; A0A7E5VCH4; A0A7E5VCG9; A0A7E5VCG7; A0A7E5VCL3; A0A7E5VCI6; A0A7E5VCH2	Serine/threonine-protein kinase ppk5 isoform X2 OS=Trichoplusia ni OX=7111 GN=LOC113492627 PE=4 SV=1; Serine/threonine-protein kinase Doa isoform X7 OS=Trichoplusia ni OX=7111 GN=LOC113492627 PE=3 SV=1; Cyclin-dependent kinase 11.1 isoform X3 OS=Trichoplusia ni OX=7111 GN=LOC113492627 PE=4 SV=1; Serine/threonine-protein kinase ppk5 isoform X1 OS=Trichoplusia ni OX=7111 GN=LOC113492627 PE=4 SV=1; …	2	488.285	975.562	36.8312	2.12	1.07889e+07
	High	[R].ILGPIPYR.[M]	1	7	A0A7E5VCG7	A0A7E5VCI1; A0A7E5VCH4; A0A7E5VCG9; A0A7E5VCG7; A0A7E5VCL3; A0A7E5VCI6; A0A7E5VCH2	Serine/threonine-protein kinase ppk5 isoform X2 OS=Trichoplusia ni OX=7111 GN=LOC113492627 PE=4 SV=1; Serine/threonine-protein kinase Doa isoform X7 OS=Trichoplusia ni OX=7111 GN=LOC113492627 PE=3 SV=1; Cyclin-dependent kinase 11.1 isoform X3 OS=Trichoplusia ni OX=7111 GN=LOC113492627 PE=4 SV=1; Serine/threonine-protein kinase ppk5 isoform X1 OS=Trichoplusia ni OX=7111 GN=LOC113492627 PE=4 SV=1; …	2	464.785	928.563	28.7147	1.66	1.47186e+07
	High	[K].LDWDEK.[S]	1	7	A0A7E5VCG7	A0A7E5VCI1; A0A7E5VCH4; A0A7E5VCG9; A0A7E5VCG7; A0A7E5VCL3; A0A7E5VCI6; A0A7E5VCH2	Serine/threonine-protein kinase ppk5 isoform X2 OS=Trichoplusia ni OX=7111 GN=LOC113492627 PE=4 SV=1; Serine/threonine-protein kinase Doa isoform X7 OS=Trichoplusia ni OX=7111 GN=LOC113492627 PE=3 SV=1; Cyclin-dependent kinase 11.1 isoform X3 OS=Trichoplusia ni OX=7111 GN=LOC113492627 PE=4 SV=1; Serine/threonine-protein kinase ppk5 isoform X1 OS=Trichoplusia ni OX=7111 GN=LOC113492627 PE=4 SV=1; …	2	403.19	805.373	22.9491	1.99	1771528
High	A0A7E5VT10	T-complex protein 1 subunit zeta OS=Trichoplusia ni OX=7111 GN=LOC113496326 PE=3 SV=1	FALSE	TRUE	FALSE	22.5989	11	12	11	9.92638e+06	25.85
	Confidence	Annotated Sequence	# Protein Groups	# Proteins	Master Protein Accessions	Protein Accessions	Protein Descriptions	Charge	m/z [Da]	MH+ [Da]	RT [min]	XCorr	Area
	High	[K].TLAINSGYDAQDTIVK.[L]	1	1	A0A7E5VT10	A0A7E5VT10	T-complex protein 1 subunit zeta OS=Trichoplusia ni OX=7111 GN=LOC113496326 PE=3 SV=1	2	854.942	1708.88	30.819	2.14	5.71675e+06
	High	[R].ILTEGFDVAR.[N]	1	1	A0A7E5VT10	A0A7E5VT10	T-complex protein 1 subunit zeta OS=Trichoplusia ni OX=7111 GN=LOC113496326 PE=3 SV=1	2	560.803	1120.6	29.9674	2.12	1.35433e+07
	High	[K].DGNVLLHEmQIQHPTASLIAR.[A]	1	1	A0A7E5VT10	A0A7E5VT10	T-complex protein 1 subunit zeta OS=Trichoplusia ni OX=7111 GN=LOC113496326 PE=3 SV=1	3	787.078	2359.22	29.5273	2.88	2.43768e+06
	High	[R].EDLLDVTR.[T]	1	1	A0A7E5VT10	A0A7E5VT10	T-complex protein 1 subunit zeta OS=Trichoplusia ni OX=7111 GN=LOC113496326 PE=3 SV=1	2	480.753	960.499	29.5335	2.45	3.15808e+06
	High	[K].HTLAQIK.[D]	1	1	A0A7E5VT10	A0A7E5VT10	T-complex protein 1 subunit zeta OS=Trichoplusia ni OX=7111 GN=LOC113496326 PE=3 SV=1	2	405.745	810.483	12.9847	2.42	3.23833e+06
	High	[K].QADIYISEGLHPR.[I]	1	1	A0A7E5VT10	A0A7E5VT10	T-complex protein 1 subunit zeta OS=Trichoplusia ni OX=7111 GN=LOC113496326 PE=3 SV=1	3	500.26	1498.76	25.8561	3.57	8.76082e+06
	High	[-].mAAISLLNPK.[A]	1	1	A0A7E5VT10	A0A7E5VT10	T-complex protein 1 subunit zeta OS=Trichoplusia ni OX=7111 GN=LOC113496326 PE=3 SV=1	2	484.793	968.579	40.229	1.84	4.95876e+06
	High	[K].DGNVLLHEmQIQHPTASLIAR.[A]	1	1	A0A7E5VT10	A0A7E5VT10	T-complex protein 1 subunit zeta OS=Trichoplusia ni OX=7111 GN=LOC113496326 PE=3 SV=1	4	590.561	2359.22	29.5074	2.03	6.47294e+06
	High	[K].YTFVEQcK.[N]	1	1	A0A7E5VT10	A0A7E5VT10	T-complex protein 1 subunit zeta OS=Trichoplusia ni OX=7111 GN=LOC113496326 PE=3 SV=1	2	537.75	1074.49	22.1782	1.92	1.93108e+06
	High	[K].ANLELLK.[Y]	1	1	A0A7E5VT10	A0A7E5VT10	T-complex protein 1 subunit zeta OS=Trichoplusia ni OX=7111 GN=LOC113496326 PE=3 SV=1	2	400.747	800.487	25.4126	1.99	5.21237e+06
	High	[K].TEVNSGFFYK.[S]	1	1	A0A7E5VT10	A0A7E5VT10	T-complex protein 1 subunit zeta OS=Trichoplusia ni OX=7111 GN=LOC113496326 PE=3 SV=1	2	596.288	1191.57	28.513	2.34	7.47506e+06
	High	[K].NPQSVTILIK.[G]	1	1	A0A7E5VT10	A0A7E5VT10	T-complex protein 1 subunit zeta OS=Trichoplusia ni OX=7111 GN=LOC113496326 PE=3 SV=1	2	556.837	1112.67	27.9389	2.18	3.0247e+06
High	A0A7E5WEJ6	Protein disulfide-isomerase OS=Trichoplusia ni OX=7111 GN=LOC113501793 PE=3 SV=1	FALSE	TRUE	FALSE	15.7143	7	7	7	9.8035e+06	16.24
	Confidence	Annotated Sequence	# Protein Groups	# Proteins	Master Protein Accessions	Protein Accessions	Protein Descriptions	Charge	m/z [Da]	MH+ [Da]	RT [min]	XCorr	Area
	High	[K].STcEQFSVSGYPTLK.[I]	1	1	A0A7E5WEJ6	A0A7E5WEJ6	Protein disulfide-isomerase OS=Trichoplusia ni OX=7111 GN=LOC113501793 PE=3 SV=1	2	852.403	1703.8	31.534	1.83	1.32302e+06
	High	[K].FEDSSVVYK.[G]	1	1	A0A7E5WEJ6	A0A7E5WEJ6	Protein disulfide-isomerase OS=Trichoplusia ni OX=7111 GN=LOC113501793 PE=3 SV=1	2	537.261	1073.51	23.0697	2.32	1.14407e+07
	High	[K].IDATANDWPK.[T]	1	1	A0A7E5WEJ6	A0A7E5WEJ6	Protein disulfide-isomerase OS=Trichoplusia ni OX=7111 GN=LOC113501793 PE=3 SV=1	2	565.777	1130.55	25.4396	2.22	6.15559e+06
	High	[K].LAPIWEELGDK.[L]	1	1	A0A7E5WEJ6	A0A7E5WEJ6	Protein disulfide-isomerase OS=Trichoplusia ni OX=7111 GN=LOC113501793 PE=3 SV=1	2	635.838	1270.67	37.8821	2.55	8.95428e+06
	High	[R].NGEVSQEYNGPR.[E]	1	1	A0A7E5WEJ6	A0A7E5WEJ6	Protein disulfide-isomerase OS=Trichoplusia ni OX=7111 GN=LOC113501793 PE=3 SV=1	2	675.307	1349.61	19.1552	2.96	2408981
	High	[R].LKPEYAVAAGVLK.[N]	1	1	A0A7E5WEJ6	A0A7E5WEJ6	Protein disulfide-isomerase OS=Trichoplusia ni OX=7111 GN=LOC113501793 PE=3 SV=1	3	453.606	1358.8	26.9679	2.53	8.06249e+06
	Medium	[R].ALEDFVK.[Y]	1	1	A0A7E5WEJ6	A0A7E5WEJ6	Protein disulfide-isomerase OS=Trichoplusia ni OX=7111 GN=LOC113501793 PE=3 SV=1	2	411.224	821.44	27.2661	1.83	9.01554e+06
High	A0A7E5X265	dihydrolipoyllysine-residue acetyltransferase OS=Trichoplusia ni OX=7111 GN=LOC113507738 PE=3 SV=1	FALSE	TRUE	FALSE	14.9225	7	7	7	9.17688e+06	15.2
	Confidence	Annotated Sequence	# Protein Groups	# Proteins	Master Protein Accessions	Protein Accessions	Protein Descriptions	Charge	m/z [Da]	MH+ [Da]	RT [min]	XCorr	Area
	High	[K].LAEGDLLcEIETDK.[A]	1	4	A0A7E5X265	A0A7E5X004; A0A7E5X1C9; A0A7E5X265; A0A7E5X1Y9	dihydrolipoyllysine-residue acetyltransferase OS=Trichoplusia ni OX=7111 GN=LOC113507738 PE=3 SV=1; dihydrolipoyllysine-residue acetyltransferase OS=Trichoplusia ni OX=7111 GN=LOC113507738 PE=3 SV=1; dihydrolipoyllysine-residue acetyltransferase OS=Trichoplusia ni OX=7111 GN=LOC113507738 PE=3 SV=1; dihydrolipoyllysine-residue acetyltransferase OS=Trichoplusia ni OX=7111 GN=LOC113507738 PE=3 SV=1	2	803.387	1605.77	37.927	2.53	818067
	High	[R].VPAVNSHWmDTYIR.[Q]	1	4	A0A7E5X265	A0A7E5X004; A0A7E5X1C9; A0A7E5X265; A0A7E5X1Y9	dihydrolipoyllysine-residue acetyltransferase OS=Trichoplusia ni OX=7111 GN=LOC113507738 PE=3 SV=1; dihydrolipoyllysine-residue acetyltransferase OS=Trichoplusia ni OX=7111 GN=LOC113507738 PE=3 SV=1; dihydrolipoyllysine-residue acetyltransferase OS=Trichoplusia ni OX=7111 GN=LOC113507738 PE=3 SV=1; dihydrolipoyllysine-residue acetyltransferase OS=Trichoplusia ni OX=7111 GN=LOC113507738 PE=3 SV=1	3	568.944	1704.82	27.7737	2.8	3.64218e+06
	High	[R].LSGQGSGLYGSLK.[S]	1	4	A0A7E5X265	A0A7E5X004; A0A7E5X1C9; A0A7E5X265; A0A7E5X1Y9	dihydrolipoyllysine-residue acetyltransferase OS=Trichoplusia ni OX=7111 GN=LOC113507738 PE=3 SV=1; dihydrolipoyllysine-residue acetyltransferase OS=Trichoplusia ni OX=7111 GN=LOC113507738 PE=3 SV=1; dihydrolipoyllysine-residue acetyltransferase OS=Trichoplusia ni OX=7111 GN=LOC113507738 PE=3 SV=1; dihydrolipoyllysine-residue acetyltransferase OS=Trichoplusia ni OX=7111 GN=LOC113507738 PE=3 SV=1	2	633.839	1266.67	25.08	3.05	8.81552e+06
	High	[K].FATFTASADHR.[V]	1	4	A0A7E5X265	A0A7E5X004; A0A7E5X1C9; A0A7E5X265; A0A7E5X1Y9	dihydrolipoyllysine-residue acetyltransferase OS=Trichoplusia ni OX=7111 GN=LOC113507738 PE=3 SV=1; dihydrolipoyllysine-residue acetyltransferase OS=Trichoplusia ni OX=7111 GN=LOC113507738 PE=3 SV=1; dihydrolipoyllysine-residue acetyltransferase OS=Trichoplusia ni OX=7111 GN=LOC113507738 PE=3 SV=1; dihydrolipoyllysine-residue acetyltransferase OS=Trichoplusia ni OX=7111 GN=LOC113507738 PE=3 SV=1	3	408.531	1223.58	20.5178	2.46	5.30972e+06
	High	[K].IVIPEGAK.[G]	1	4	A0A7E5X265	A0A7E5X004; A0A7E5X1C9; A0A7E5X265; A0A7E5X1Y9	dihydrolipoyllysine-residue acetyltransferase OS=Trichoplusia ni OX=7111 GN=LOC113507738 PE=3 SV=1; dihydrolipoyllysine-residue acetyltransferase OS=Trichoplusia ni OX=7111 GN=LOC113507738 PE=3 SV=1; dihydrolipoyllysine-residue acetyltransferase OS=Trichoplusia ni OX=7111 GN=LOC113507738 PE=3 SV=1; dihydrolipoyllysine-residue acetyltransferase OS=Trichoplusia ni OX=7111 GN=LOC113507738 PE=3 SV=1	2	413.755	826.503	21.5972	1.96	1.1011e+07
	Medium	[R].VYASPmAR.[R]	1	4	A0A7E5X265	A0A7E5X004; A0A7E5X1C9; A0A7E5X265; A0A7E5X1Y9	dihydrolipoyllysine-residue acetyltransferase OS=Trichoplusia ni OX=7111 GN=LOC113507738 PE=3 SV=1; dihydrolipoyllysine-residue acetyltransferase OS=Trichoplusia ni OX=7111 GN=LOC113507738 PE=3 SV=1; dihydrolipoyllysine-residue acetyltransferase OS=Trichoplusia ni OX=7111 GN=LOC113507738 PE=3 SV=1; dihydrolipoyllysine-residue acetyltransferase OS=Trichoplusia ni OX=7111 GN=LOC113507738 PE=3 SV=1	2	455.726	910.445	15.0256	0.93	7.70411e+06
	Medium	[K].ISmNDFIIK.[A]	1	4	A0A7E5X265	A0A7E5X004; A0A7E5X1C9; A0A7E5X265; A0A7E5X1Y9	dihydrolipoyllysine-residue acetyltransferase OS=Trichoplusia ni OX=7111 GN=LOC113507738 PE=3 SV=1; dihydrolipoyllysine-residue acetyltransferase OS=Trichoplusia ni OX=7111 GN=LOC113507738 PE=3 SV=1; dihydrolipoyllysine-residue acetyltransferase OS=Trichoplusia ni OX=7111 GN=LOC113507738 PE=3 SV=1; dihydrolipoyllysine-residue acetyltransferase OS=Trichoplusia ni OX=7111 GN=LOC113507738 PE=3 SV=1	2	548.789	1096.57	29.2902	2.4	3.40881e+06
High	A0A7E5WM09	FK506-binding protein OS=Trichoplusia ni OX=7111 GN=LOC113503552 PE=3 SV=1	FALSE	TRUE	FALSE	17.3913	6	7	6	9.17293e+06	17.08
	Confidence	Annotated Sequence	# Protein Groups	# Proteins	Master Protein Accessions	Protein Accessions	Protein Descriptions	Charge	m/z [Da]	MH+ [Da]	RT [min]	XCorr	Area
	High	[K].QLTGGVAIEDLK.[V]	1	2	A0A7E5WM09	A0A7E5WWH6; A0A7E5WM09	FK506-binding protein OS=Trichoplusia ni OX=7111 GN=LOC113506553 PE=3 SV=1; FK506-binding protein OS=Trichoplusia ni OX=7111 GN=LOC113503552 PE=3 SV=1	2	622.348	1243.69	29.8181	3.39	9.34611e+06
	High	[K].EVISGWDVGIAGMK.[V]	1	2	A0A7E5WM09	A0A7E5WWH6; A0A7E5WM09	FK506-binding protein OS=Trichoplusia ni OX=7111 GN=LOC113506553 PE=3 SV=1; FK506-binding protein OS=Trichoplusia ni OX=7111 GN=LOC113503552 PE=3 SV=1	2	731.373	1461.74	38.625	3.35	600370
	High	[K].FLDGEDIDTDENDDSFK.[I]	1	2	A0A7E5WM09	A0A7E5WWH6; A0A7E5WM09	FK506-binding protein OS=Trichoplusia ni OX=7111 GN=LOC113506553 PE=3 SV=1; FK506-binding protein OS=Trichoplusia ni OX=7111 GN=LOC113503552 PE=3 SV=1	2	987.907	1974.81	34.6026	2.97	1.96081e+06
	High	[R].IIQVPLDLYFK.[T]	1	2	A0A7E5WM09	A0A7E5WWH6; A0A7E5WM09	FK506-binding protein OS=Trichoplusia ni OX=7111 GN=LOC113506553 PE=3 SV=1; FK506-binding protein OS=Trichoplusia ni OX=7111 GN=LOC113503552 PE=3 SV=1	2	674.898	1348.79	42.9076	2.96	2.81975e+06
	High	[K].VVTVYYEGR.[L]	1	2	A0A7E5WM09	A0A7E5WWH6; A0A7E5WM09	FK506-binding protein OS=Trichoplusia ni OX=7111 GN=LOC113506553 PE=3 SV=1; FK506-binding protein OS=Trichoplusia ni OX=7111 GN=LOC113503552 PE=3 SV=1	2	543.285	1085.56	23.9551	2.15	1.29331e+07
	High	[K].EVISGWDVGIAGmK.[V]	1	2	A0A7E5WM09	A0A7E5WWH6; A0A7E5WM09	FK506-binding protein OS=Trichoplusia ni OX=7111 GN=LOC113506553 PE=3 SV=1; FK506-binding protein OS=Trichoplusia ni OX=7111 GN=LOC113503552 PE=3 SV=1	2	739.372	1477.74	34.9981	2.26
	High	[K].NFLVcTLQK.[G]	1	2	A0A7E5WM09	A0A7E5WWH6; A0A7E5WM09	FK506-binding protein OS=Trichoplusia ni OX=7111 GN=LOC113506553 PE=3 SV=1; FK506-binding protein OS=Trichoplusia ni OX=7111 GN=LOC113503552 PE=3 SV=1	2	561.803	1122.6	29.7525	1.59	5.23954e+06
High	A0A7E5WZQ1	T-complex protein 1 subunit eta OS=Trichoplusia ni OX=7111 GN=LOC113507248 PE=3 SV=1	FALSE	TRUE	FALSE	11.7647	6	6	6	8.42205e+06	13.67
	Confidence	Annotated Sequence	# Protein Groups	# Proteins	Master Protein Accessions	Protein Accessions	Protein Descriptions	Charge	m/z [Da]	MH+ [Da]	RT [min]	XCorr	Area
	High	[R].GGAEQFLEETER.[S]	1	1	A0A7E5WZQ1	A0A7E5WZQ1	T-complex protein 1 subunit eta OS=Trichoplusia ni OX=7111 GN=LOC113507248 PE=3 SV=1	2	683.318	1365.63	29.4517	3.29	1.11166e+07
	High	[K].LPIGDVATQYFADR.[D]	1	1	A0A7E5WZQ1	A0A7E5WZQ1	T-complex protein 1 subunit eta OS=Trichoplusia ni OX=7111 GN=LOC113507248 PE=3 SV=1	2	783.402	1565.8	38.0967	3.87	6.64696e+06
	High	[K].TFSYAGFEmQPK.[T]	1	1	A0A7E5WZQ1	A0A7E5WZQ1	T-complex protein 1 subunit eta OS=Trichoplusia ni OX=7111 GN=LOC113507248 PE=3 SV=1	2	711.326	1421.64	29.5676	2.65	4.36558e+06
	High	[K].TcTLILR.[G]	1	1	A0A7E5WZQ1	A0A7E5WZQ1	T-complex protein 1 subunit eta OS=Trichoplusia ni OX=7111 GN=LOC113507248 PE=3 SV=1	2	438.752	876.497	24.1462	1.85	4.05004e+06
	High	[K].GADmPTAGAPGR.[G]	1	1	A0A7E5WZQ1	A0A7E5WZQ1	T-complex protein 1 subunit eta OS=Trichoplusia ni OX=7111 GN=LOC113507248 PE=3 SV=1	2	558.759	1116.51	15.3533	2.01	6933555
	High	[R].VPEEDLR.[R]	1	1	A0A7E5WZQ1	A0A7E5WZQ1	T-complex protein 1 subunit eta OS=Trichoplusia ni OX=7111 GN=LOC113507248 PE=3 SV=1	2	429.222	857.436	18.2801	1.31	7.21602e+06
High	A0A7E5VM85	Afadin isoform X1 OS=Trichoplusia ni OX=7111 GN=LOC113495058 PE=4 SV=1	FALSE	TRUE	FALSE	1.8602	3	3	3	7.81534e+06	7.13
	Confidence	Annotated Sequence	# Protein Groups	# Proteins	Master Protein Accessions	Protein Accessions	Protein Descriptions	Charge	m/z [Da]	MH+ [Da]	RT [min]	XCorr	Area
	High	[R].DATIAQLVSLGAAR.[T]	1	3	A0A7E5VM85	A0A7E5VM85; A0A7E5VMN4; A0A7E5VMD8	Afadin isoform X1 OS=Trichoplusia ni OX=7111 GN=LOC113495058 PE=4 SV=1; Afadin isoform X3 OS=Trichoplusia ni OX=7111 GN=LOC113495058 PE=4 SV=1; Afadin isoform X4 OS=Trichoplusia ni OX=7111 GN=LOC113495058 PE=4 SV=1	2	693.391	1385.77	41.0587	2.86	4.74855e+06
	High	[R].TPVQNQQLR.[S]	1	3	A0A7E5VM85	A0A7E5VM85; A0A7E5VMN4; A0A7E5VMD8	Afadin isoform X1 OS=Trichoplusia ni OX=7111 GN=LOC113495058 PE=4 SV=1; Afadin isoform X3 OS=Trichoplusia ni OX=7111 GN=LOC113495058 PE=4 SV=1; Afadin isoform X4 OS=Trichoplusia ni OX=7111 GN=LOC113495058 PE=4 SV=1	2	542.299	1083.59	15.8499	2.29	1.10291e+07
	Medium	[R].GSSFAVmAER.[A]	1	3	A0A7E5VM85	A0A7E5VM85; A0A7E5VMN4; A0A7E5VMD8	Afadin isoform X1 OS=Trichoplusia ni OX=7111 GN=LOC113495058 PE=4 SV=1; Afadin isoform X3 OS=Trichoplusia ni OX=7111 GN=LOC113495058 PE=4 SV=1; Afadin isoform X4 OS=Trichoplusia ni OX=7111 GN=LOC113495058 PE=4 SV=1	2	535.75	1070.49	20.135	1.98	7.66834e+06
High	A0A7E5W943	Cleavage and polyadenylation specificity factor subunit 6 OS=Trichoplusia ni OX=7111 GN=LOC113500207 PE=3 SV=1	FALSE	TRUE	FALSE	6.04027	3	3	3	7.40525e+06	10.42
	Confidence	Annotated Sequence	# Protein Groups	# Proteins	Master Protein Accessions	Protein Accessions	Protein Descriptions	Charge	m/z [Da]	MH+ [Da]	RT [min]	XCorr	Area
	High	[K].ILISSLQDTLHGVETK.[S]	1	1	A0A7E5W943	A0A7E5W943	Cleavage and polyadenylation specificity factor subunit 6 OS=Trichoplusia ni OX=7111 GN=LOC113500207 PE=3 SV=1	3	585.328	1753.97	34.1301	3.94	5.27933e+06
	High	[K].QALNQFESQSK.[T]	1	1	A0A7E5W943	A0A7E5W943	Cleavage and polyadenylation specificity factor subunit 6 OS=Trichoplusia ni OX=7111 GN=LOC113500207 PE=3 SV=1	2	640.317	1279.63	20.7593	2.88	9.53117e+06
	High	[K].SPVEPAAEGGAGDAAGAK.[S]	1	1	A0A7E5W943	A0A7E5W943	Cleavage and polyadenylation specificity factor subunit 6 OS=Trichoplusia ni OX=7111 GN=LOC113500207 PE=3 SV=1	2	777.873	1554.74	18.987	3.6
High	A0A7E5V8L2	Uncharacterized protein LOC113491711 OS=Trichoplusia ni OX=7111 GN=LOC113491711 PE=4 SV=1	FALSE	TRUE	FALSE	16.1663	4	5	4	6.8863e+06	16.4
	Confidence	Annotated Sequence	# Protein Groups	# Proteins	Master Protein Accessions	Protein Accessions	Protein Descriptions	Charge	m/z [Da]	MH+ [Da]	RT [min]	XCorr	Area
	High	[K].AGYPSANNYHYTPPQQISYAPTR.[G]	1	1	A0A7E5V8L2	A0A7E5V8L2	Uncharacterized protein LOC113491711 OS=Trichoplusia ni OX=7111 GN=LOC113491711 PE=4 SV=1	3	866.079	2596.22	28.9589	2.84	1.43421e+06
	High	[K].SHTPIPGEVcK.[F]	1	1	A0A7E5V8L2	A0A7E5V8L2	Uncharacterized protein LOC113491711 OS=Trichoplusia ni OX=7111 GN=LOC113491711 PE=4 SV=1	3	408.873	1224.6	17.165	2.45	7.5471e+06
	High	[K].DNGDYEETR.[I]	1	1	A0A7E5V8L2	A0A7E5V8L2	Uncharacterized protein LOC113491711 OS=Trichoplusia ni OX=7111 GN=LOC113491711 PE=4 SV=1	2	549.721	1098.43	15.8513	2.05	3.85212e+06
	High	[R].GSSGGSHGYPSSGGLSGSGTGHNYPSK.[A]	1	1	A0A7E5V8L2	A0A7E5V8L2	Uncharacterized protein LOC113491711 OS=Trichoplusia ni OX=7111 GN=LOC113491711 PE=4 SV=1	3	827.034	2479.09	17.4778	5.5	9259675
	High	[R].GSSGGSHGYPSSGGLSGSGTGHNYPSK.[A]	1	1	A0A7E5V8L2	A0A7E5V8L2	Uncharacterized protein LOC113491711 OS=Trichoplusia ni OX=7111 GN=LOC113491711 PE=4 SV=1	4	620.528	2479.09	17.6707	3.56
High	A0A7E5W8P4	Pyruvate kinase OS=Trichoplusia ni OX=7111 GN=LOC113500423 PE=3 SV=1	FALSE	TRUE	FALSE	15.4851	6	7	6	6.70248e+06	15.04
	Confidence	Annotated Sequence	# Protein Groups	# Proteins	Master Protein Accessions	Protein Accessions	Protein Descriptions	Charge	m/z [Da]	MH+ [Da]	RT [min]	XCorr	Area
	High	[R].QLFNDLVR.[D]	1	3	A0A7E5W8P4	A0A7E5W8P4; A0A7E5W9Y8; A0A7E5W8Q1	Pyruvate kinase OS=Trichoplusia ni OX=7111 GN=LOC113500423 PE=3 SV=1; Pyruvate kinase OS=Trichoplusia ni OX=7111 GN=LOC113500423 PE=3 SV=1; Pyruvate kinase OS=Trichoplusia ni OX=7111 GN=LOC113500423 PE=3 SV=1	2	502.781	1004.55	31.4402	2.51	9.41441e+06
	High	[R].DVEAPLEPAHSTAIAAVEASTK.[C]	1	3	A0A7E5W8P4	A0A7E5W8P4; A0A7E5W9Y8; A0A7E5W8Q1	Pyruvate kinase OS=Trichoplusia ni OX=7111 GN=LOC113500423 PE=3 SV=1; Pyruvate kinase OS=Trichoplusia ni OX=7111 GN=LOC113500423 PE=3 SV=1; Pyruvate kinase OS=Trichoplusia ni OX=7111 GN=LOC113500423 PE=3 SV=1	3	736.38	2207.12	32.87	3.34	5.79209e+06
	High	[K].TGDHVVVVTGWK.[Q]	1	3	A0A7E5W8P4	A0A7E5W8P4; A0A7E5W9Y8; A0A7E5W8Q1	Pyruvate kinase OS=Trichoplusia ni OX=7111 GN=LOC113500423 PE=3 SV=1; Pyruvate kinase OS=Trichoplusia ni OX=7111 GN=LOC113500423 PE=3 SV=1; Pyruvate kinase OS=Trichoplusia ni OX=7111 GN=LOC113500423 PE=3 SV=1	3	433.235	1297.69	24.5694	2.71	4.90094e+06
	High	[R].DVAmLER.[M]	1	3	A0A7E5W8P4	A0A7E5W8P4; A0A7E5W9Y8; A0A7E5W8Q1	Pyruvate kinase OS=Trichoplusia ni OX=7111 GN=LOC113500423 PE=3 SV=1; Pyruvate kinase OS=Trichoplusia ni OX=7111 GN=LOC113500423 PE=3 SV=1; Pyruvate kinase OS=Trichoplusia ni OX=7111 GN=LOC113500423 PE=3 SV=1	2	425.21	849.413	19.8668	1.4	3.64538e+06
	High	[R].GVLPmVYQEPAASDWLK.[D]	1	3	A0A7E5W8P4	A0A7E5W8P4; A0A7E5W9Y8; A0A7E5W8Q1	Pyruvate kinase OS=Trichoplusia ni OX=7111 GN=LOC113500423 PE=3 SV=1; Pyruvate kinase OS=Trichoplusia ni OX=7111 GN=LOC113500423 PE=3 SV=1; Pyruvate kinase OS=Trichoplusia ni OX=7111 GN=LOC113500423 PE=3 SV=1	2	960.483	1919.96	39.8506	2.69	470291
	High	[K].GVNLPGIPVDLPAVSEK.[D]	1	3	A0A7E5W8P4	A0A7E5W8P4; A0A7E5W9Y8; A0A7E5W8Q1	Pyruvate kinase OS=Trichoplusia ni OX=7111 GN=LOC113500423 PE=3 SV=1; Pyruvate kinase OS=Trichoplusia ni OX=7111 GN=LOC113500423 PE=3 SV=1; Pyruvate kinase OS=Trichoplusia ni OX=7111 GN=LOC113500423 PE=3 SV=1	2	852.982	1704.96	40.8915	2.15	733289
High	A0A7E5X472	Inosine-5'-monophosphate dehydrogenase OS=Trichoplusia ni OX=7111 GN=LOC113508532 PE=3 SV=1	FALSE	TRUE	FALSE	11.7188	5	5	5	6.69189e+06	10.43
	Confidence	Annotated Sequence	# Protein Groups	# Proteins	Master Protein Accessions	Protein Accessions	Protein Descriptions	Charge	m/z [Da]	MH+ [Da]	RT [min]	XCorr	Area
	High	[K].NLIDAGADALR.[V]	1	1	A0A7E5X472	A0A7E5X472	Inosine-5'-monophosphate dehydrogenase OS=Trichoplusia ni OX=7111 GN=LOC113508532 PE=3 SV=1	2	564.804	1128.6	31.7231	2.85	7.10069e+06
	High	[K].TTYPDIQVIGGNVVTR.[I]	1	1	A0A7E5X472	A0A7E5X472	Inosine-5'-monophosphate dehydrogenase OS=Trichoplusia ni OX=7111 GN=LOC113508532 PE=3 SV=1	2	866.965	1732.92	35.0732	2.49	4.49263e+06
	High	[R].GmGSLEAmENKDGK.[G]	1	1	A0A7E5X472	A0A7E5X472	Inosine-5'-monophosphate dehydrogenase OS=Trichoplusia ni OX=7111 GN=LOC113508532 PE=3 SV=1	3	500.221	1498.65	13.0556	2.42	1.12998e+06
	High	[K].QLLVGAAIGTR.[E]	1	1	A0A7E5X472	A0A7E5X472	Inosine-5'-monophosphate dehydrogenase OS=Trichoplusia ni OX=7111 GN=LOC113508532 PE=3 SV=1	2	549.835	1098.66	28.7677	2.68	4.5649e+06
	Medium	[R].LIGIVTSR.[D]	1	1	A0A7E5X472	A0A7E5X472	Inosine-5'-monophosphate dehydrogenase OS=Trichoplusia ni OX=7111 GN=LOC113508532 PE=3 SV=1	2	429.774	858.54	25.4032	1.56	8.41007e+06
High	P02533	Keratin, type I cytoskeletal 14 OS=Homo sapiens GN=KRT14 PE=1 SV=4	TRUE	FALSE	FALSE	14.1949	6	6	3	6.33905e+06	17.96
	Confidence	Annotated Sequence	# Protein Groups	# Proteins	Master Protein Accessions	Protein Accessions	Protein Descriptions	Charge	m/z [Da]	MH+ [Da]	RT [min]	XCorr	Area
	High	[K].DAEEWFFTK.[T]	1	2	P02533	P02533; Q6IFX2	Keratin, type I cytoskeletal 14 OS=Homo sapiens GN=KRT14 PE=1 SV=4; Keratin, type I cytoskeletal 42 OS=Mus musculus GN=Krt42 PE=1 SV=1	2	586.767	1172.53	39.2765	3.17	4.11633e+06
	High	[R].LLEGEDAHLSSSQFSSGSQSSR.[D]	1	2	P02533	P02533; Q61782	Keratin, type I cytoskeletal 14 OS=Homo sapiens GN=KRT14 PE=1 SV=4; Type I epidermal keratin mRNA, 3'end (Fragment) OS=Mus musculus PE=2 SV=1	3	770.36	2309.07	25.8019	5.11
	High	[K].VTmQNLNDR.[L]	3	10	P02533; P13645; P08779	Q9Z2K1; P02533; Q7Z3Y7; P13645; Q148H6; Q7Z3Y9; Q7Z3Z0; Q3ZAW8; Q7Z3Y8; P08779	Keratin, type I cytoskeletal 16 OS=Mus musculus GN=Krt16 PE=1 SV=3; Keratin, type I cytoskeletal 14 OS=Homo sapiens GN=KRT14 PE=1 SV=4; Keratin, type I cytoskeletal 28 OS=Homo sapiens GN=KRT28 PE=1 SV=2; Keratin, type I cytoskeletal 10 OS=Homo sapiens GN=KRT10 PE=1 SV=6; Keratin, type I cytoskeletal 28 OS=Bos taurus GN=KRT28 PE=2 SV=1; Keratin, type I cytoskeletal 26 OS=Homo sapiens GN=KRT26 PE=1…	2	553.767	1106.53	14.5476	2.72	3.2039e+07
	High	[R].EVATNSELVQSGK.[S]	1	3	P02533	P02533; Q04695; Q9QWL7	Keratin, type I cytoskeletal 14 OS=Homo sapiens GN=KRT14 PE=1 SV=4; Keratin, type I cytoskeletal 17 OS=Homo sapiens GN=KRT17 PE=1 SV=2; Keratin, type I cytoskeletal 17 OS=Mus musculus GN=Krt17 PE=1 SV=3	2	681.349	1361.69	19.9725	2.82	8.56177e+06
	High	[KR].LAADDFR.[ATILV]	3	25	P02533; P13645; P08779	Q14532; Q9Z2K1; O76015; O76013; P02533; Q15323; Q7Z3Y7; P08727; Q2M2I5; Q14525; P13645; Q92764; Q6IFX2; Q497I4; O77727; Q148H6; P05784; P19012; P02534; Q3ZAW8; Q04695; P19001; O76014; P08779; Q9QWL7	Keratin, type I cuticular Ha2 OS=Homo sapiens GN=KRT32 PE=1 SV=3; Keratin, type I cytoskeletal 16 OS=Mus musculus GN=Krt16 PE=1 SV=3; Keratin, type I cuticular Ha8 OS=Homo sapiens GN=KRT38 PE=2 SV=3; Keratin, type I cuticular Ha6 OS=Homo sapiens GN=KRT36 PE=1 SV=1; Keratin, type I cytoskeletal 14 OS=Homo sapiens GN=KRT14 PE=1 SV=4; Keratin, type I cuticular Ha1 OS=Homo sapiens GN=KRT31 PE=2 SV=3;…	2	404.204	807.4	22.1774	1.97	1.08382e+08
	High	[R].LASYLDK.[V]	4	11	P02533; P13645; P35527; P08779	P02533; P08727; P13645; P05784; P19012; Q99456; Q04695; P19001; P35527; P08779; Q9QWL7	Keratin, type I cytoskeletal 14 OS=Homo sapiens GN=KRT14 PE=1 SV=4; Keratin, type I cytoskeletal 19 OS=Homo sapiens GN=KRT19 PE=1 SV=4; Keratin, type I cytoskeletal 10 OS=Homo sapiens GN=KRT10 PE=1 SV=6; Keratin, type I cytoskeletal 18 OS=Mus musculus GN=Krt18 PE=1 SV=5; Keratin, type I cytoskeletal 15 OS=Homo sapiens GN=KRT15 PE=1 SV=3; Keratin, type I cytoskeletal 12 OS=Homo sapiens GN=KRT12 PE…	2	405.224	809.44	20.2596	2.18	107661134
High	A0A7E5VVN0	T-complex protein 1 subunit delta OS=Trichoplusia ni OX=7111 GN=LOC113497142 PE=3 SV=1	FALSE	TRUE	FALSE	7.7634	4	4	4	5.92064e+06	11.22
	Confidence	Annotated Sequence	# Protein Groups	# Proteins	Master Protein Accessions	Protein Accessions	Protein Descriptions	Charge	m/z [Da]	MH+ [Da]	RT [min]	XCorr	Area
	High	[R].QYILNIVK.[Q]	1	1	A0A7E5VVN0	A0A7E5VVN0	T-complex protein 1 subunit delta OS=Trichoplusia ni OX=7111 GN=LOC113497142 PE=3 SV=1	2	495.803	990.598	30.723	2.79	5.54282e+06
	High	[R].GAESGSGSNAGVNVR.[R]	1	1	A0A7E5VVN0	A0A7E5VVN0	T-complex protein 1 subunit delta OS=Trichoplusia ni OX=7111 GN=LOC113497142 PE=3 SV=1	2	681.325	1361.64	15.6374	4.09	4.6446e+06
	High	[K].MLVELSR.[A]	1	1	A0A7E5VVN0	A0A7E5VVN0	T-complex protein 1 subunit delta OS=Trichoplusia ni OX=7111 GN=LOC113497142 PE=3 SV=1	2	424.238	847.47	26.1079	1.69	902517
	High	[R].GSSGAVVAEAAR.[S]	1	1	A0A7E5VVN0	A0A7E5VVN0	T-complex protein 1 subunit delta OS=Trichoplusia ni OX=7111 GN=LOC113497142 PE=3 SV=1	2	537.781	1074.55	17.1858	2.65	7.57451e+06
High	A0A7E5VGA7	Probable 26S proteasome non-ATPase regulatory subunit 3 OS=Trichoplusia ni OX=7111 GN=LOC113493512 PE=3 SV=1	FALSE	TRUE	FALSE	17.8138	7	8	7	5.6944e+06	17.45
	Confidence	Annotated Sequence	# Protein Groups	# Proteins	Master Protein Accessions	Protein Accessions	Protein Descriptions	Charge	m/z [Da]	MH+ [Da]	RT [min]	XCorr	Area
	High	[K].ALAPYFQLTQAVR.[L]	1	1	A0A7E5VGA7	A0A7E5VGA7	Probable 26S proteasome non-ATPase regulatory subunit 3 OS=Trichoplusia ni OX=7111 GN=LOC113493512 PE=3 SV=1	3	493.278	1477.82	37.5212	2.79	451752
	High	[R].AIFNQLYPTSADK.[E]	1	1	A0A7E5VGA7	A0A7E5VGA7	Probable 26S proteasome non-ATPase regulatory subunit 3 OS=Trichoplusia ni OX=7111 GN=LOC113493512 PE=3 SV=1	2	734.379	1467.75	32.5375	2.43	7.08088e+06
	High	[K].NVESPAAASDAETPEVK.[K]	1	1	A0A7E5VGA7	A0A7E5VGA7	Probable 26S proteasome non-ATPase regulatory subunit 3 OS=Trichoplusia ni OX=7111 GN=LOC113493512 PE=3 SV=1	2	857.911	1714.81	23.0202	3.8	5.24002e+06
	High	[R].SDHTFTLILR.[L]	1	1	A0A7E5VGA7	A0A7E5VGA7	Probable 26S proteasome non-ATPase regulatory subunit 3 OS=Trichoplusia ni OX=7111 GN=LOC113493512 PE=3 SV=1	3	401.555	1202.65	29.8889	2.12	1.77697e+06
	High	[K].ALAPYFQLTQAVR.[L]	1	1	A0A7E5VGA7	A0A7E5VGA7	Probable 26S proteasome non-ATPase regulatory subunit 3 OS=Trichoplusia ni OX=7111 GN=LOC113493512 PE=3 SV=1	2	739.412	1477.82	37.4122	2.05	4.76228e+06
	High	[R].SIGLSYSR.[I]	1	1	A0A7E5VGA7	A0A7E5VGA7	Probable 26S proteasome non-ATPase regulatory subunit 3 OS=Trichoplusia ni OX=7111 GN=LOC113493512 PE=3 SV=1	2	441.738	882.468	22.9485	1.7	3.18877e+06
	Medium	[K].SVFPENASNNEWAR.[F]	1	1	A0A7E5VGA7	A0A7E5VGA7	Probable 26S proteasome non-ATPase regulatory subunit 3 OS=Trichoplusia ni OX=7111 GN=LOC113493512 PE=3 SV=1	2	810.874	1620.74	29.7772	2.57	4.38913e+06
High	A0A7E5W7I0	Nucleosome assembly protein 1-like 1 isoform X1 OS=Trichoplusia ni OX=7111 GN=LOC113499831 PE=3 SV=1	FALSE	TRUE	FALSE	6.01504	2	4	2	5.65419e+06	9.12
	Confidence	Annotated Sequence	# Protein Groups	# Proteins	Master Protein Accessions	Protein Accessions	Protein Descriptions	Charge	m/z [Da]	MH+ [Da]	RT [min]	XCorr	Area
	High	[R].NEmLAALTNR.[I]	1	2	A0A7E5W7I0	A0A7E5W7I0; A0A7E5W697	Nucleosome assembly protein 1-like 1 isoform X1 OS=Trichoplusia ni OX=7111 GN=LOC113499831 PE=3 SV=1; Nucleosome assembly protein 1-like 1 isoform X2 OS=Trichoplusia ni OX=7111 GN=LOC113499831 PE=3 SV=1	2	574.79	1148.57	23.5687	2.12	4.54059e+06
	High	[R].AVQGAAITDGTEEK.[K]	1	2	A0A7E5W7I0	A0A7E5W7I0; A0A7E5W697	Nucleosome assembly protein 1-like 1 isoform X1 OS=Trichoplusia ni OX=7111 GN=LOC113499831 PE=3 SV=1; Nucleosome assembly protein 1-like 1 isoform X2 OS=Trichoplusia ni OX=7111 GN=LOC113499831 PE=3 SV=1	2	695.347	1389.69	19.4497	2.43	6.76779e+06
	High	[R].AVQGAAITDGTEEK.[K]	1	2	A0A7E5W7I0	A0A7E5W7I0; A0A7E5W697	Nucleosome assembly protein 1-like 1 isoform X1 OS=Trichoplusia ni OX=7111 GN=LOC113499831 PE=3 SV=1; Nucleosome assembly protein 1-like 1 isoform X2 OS=Trichoplusia ni OX=7111 GN=LOC113499831 PE=3 SV=1	2	695.346	1389.69	18.941	2.68	821000
	High	[R].NEMLAALTNR.[I]	1	2	A0A7E5W7I0	A0A7E5W7I0; A0A7E5W697	Nucleosome assembly protein 1-like 1 isoform X1 OS=Trichoplusia ni OX=7111 GN=LOC113499831 PE=3 SV=1; Nucleosome assembly protein 1-like 1 isoform X2 OS=Trichoplusia ni OX=7111 GN=LOC113499831 PE=3 SV=1	2	566.793	1132.58	30.0778	1.89	1.65036e+06
High	A0A7E5VQN8	Catalase OS=Trichoplusia ni OX=7111 GN=LOC113495760 PE=3 SV=1	FALSE	TRUE	FALSE	20.3156	8	8	8	5.56268e+06	18.92
	Confidence	Annotated Sequence	# Protein Groups	# Proteins	Master Protein Accessions	Protein Accessions	Protein Descriptions	Charge	m/z [Da]	MH+ [Da]	RT [min]	XCorr	Area
	High	[R].YDSGQTEDNFAQATALYK.[Q]	1	1	A0A7E5VQN8	A0A7E5VQN8	Catalase OS=Trichoplusia ni OX=7111 GN=LOC113495760 PE=3 SV=1	2	1011.46	2021.91	33.3294	2.8	1.00646e+06
	High	[R].DPTLFPSFIHTQK.[R]	1	1	A0A7E5VQN8	A0A7E5VQN8	Catalase OS=Trichoplusia ni OX=7111 GN=LOC113495760 PE=3 SV=1	3	510.937	1530.8	35.3757	2.28	5.89936e+06
	High	[R].FSTVGGESGSADTVR.[D]	1	1	A0A7E5VQN8	A0A7E5VQN8	Catalase OS=Trichoplusia ni OX=7111 GN=LOC113495760 PE=3 SV=1	2	735.349	1469.69	21.5835	3.52	1.03644e+06
	High	[K].IFTQVHPDLGSK.[V]	1	1	A0A7E5VQN8	A0A7E5VQN8	Catalase OS=Trichoplusia ni OX=7111 GN=LOC113495760 PE=3 SV=1	3	447.91	1341.72	23.5337	2.83	5.79922e+06
	High	[K].DAAGFIQER.[A]	1	1	A0A7E5VQN8	A0A7E5VQN8	Catalase OS=Trichoplusia ni OX=7111 GN=LOC113495760 PE=3 SV=1	2	503.751	1006.5	25.3912	1.7	4.98945e+06
	High	[K].GAGAFGHFEVTHDITK.[Y]	1	1	A0A7E5VQN8	A0A7E5VQN8	Catalase OS=Trichoplusia ni OX=7111 GN=LOC113495760 PE=3 SV=1	3	562.946	1686.82	25.16	3.64	3.381e+06
	High	[K].LVNAQGVAHWVK.[F]	1	1	A0A7E5VQN8	A0A7E5VQN8	Catalase OS=Trichoplusia ni OX=7111 GN=LOC113495760 PE=3 SV=1	3	441.251	1321.74	25.0412	2.14	1.49812e+06
	High	[K].FNPFDLTK.[V]	1	1	A0A7E5VQN8	A0A7E5VQN8	Catalase OS=Trichoplusia ni OX=7111 GN=LOC113495760 PE=3 SV=1	2	491.255	981.504	36.1201	1.39	2.90534e+06
High	A0A7E5X365	Plasminogen activator inhibitor 1 RNA-binding protein-like OS=Trichoplusia ni OX=7111 GN=LOC113508773 PE=4 SV=1	FALSE	TRUE	FALSE	13.4715	3	3	3	5.5144e+06	9.62
	Confidence	Annotated Sequence	# Protein Groups	# Proteins	Master Protein Accessions	Protein Accessions	Protein Descriptions	Charge	m/z [Da]	MH+ [Da]	RT [min]	XCorr	Area
	High	[R].EPEVVEERPPLR.[A]	1	1	A0A7E5X365	A0A7E5X365	Plasminogen activator inhibitor 1 RNA-binding protein-like OS=Trichoplusia ni OX=7111 GN=LOC113508773 PE=4 SV=1	3	483.929	1449.77	22.7833	2.09	1.02821e+07
	High	[K].TGSEGEVAEEKPADTAAAGDGQQPEAER.[A]	1	1	A0A7E5X365	A0A7E5X365	Plasminogen activator inhibitor 1 RNA-binding protein-like OS=Trichoplusia ni OX=7111 GN=LOC113508773 PE=4 SV=1	3	934.089	2800.25	20.5854	5.43	5.75752e+06
	High	[R].EDRPQNGAVENK.[E]	1	1	A0A7E5X365	A0A7E5X365	Plasminogen activator inhibitor 1 RNA-binding protein-like OS=Trichoplusia ni OX=7111 GN=LOC113508773 PE=4 SV=1	3	452.888	1356.65	11.6389	2.1	503598
High	A0A7E5VLE4	Methenyltetrahydrofolate synthase domain-containing protein OS=Trichoplusia ni OX=7111 GN=LOC113494764 PE=4 SV=1	FALSE	TRUE	FALSE	9.32755	4	4	4	5.51262e+06	6.75
	Confidence	Annotated Sequence	# Protein Groups	# Proteins	Master Protein Accessions	Protein Accessions	Protein Descriptions	Charge	m/z [Da]	MH+ [Da]	RT [min]	XCorr	Area
	High	[R].LELPEGETGPSAIR.[K]	1	2	A0A7E5VLE4	A0A7E5VLE4; A0A7E5VMC4	Methenyltetrahydrofolate synthase domain-containing protein OS=Trichoplusia ni OX=7111 GN=LOC113494764 PE=4 SV=1; Methenyltetrahydrofolate synthase domain-containing protein-like OS=Trichoplusia ni OX=7111 GN=LOC113495083 PE=4 SV=1	2	734.886	1468.77	29.7558	2.39	6.85986e+06
	High	[K].LAELDVFK.[N]	1	2	A0A7E5VLE4	A0A7E5VLE4; A0A7E5VMC4	Methenyltetrahydrofolate synthase domain-containing protein OS=Trichoplusia ni OX=7111 GN=LOC113494764 PE=4 SV=1; Methenyltetrahydrofolate synthase domain-containing protein-like OS=Trichoplusia ni OX=7111 GN=LOC113495083 PE=4 SV=1	2	467.766	934.525	32.8492	2.19	4.62002e+06
	High	[K].VNPDKPQEAVR.[V]	1	2	A0A7E5VLE4	A0A7E5VLE4; A0A7E5VMC4	Methenyltetrahydrofolate synthase domain-containing protein OS=Trichoplusia ni OX=7111 GN=LOC113494764 PE=4 SV=1; Methenyltetrahydrofolate synthase domain-containing protein-like OS=Trichoplusia ni OX=7111 GN=LOC113495083 PE=4 SV=1	3	418.226	1252.66	14.8943	1.7	5.05799e+06
	High	[R].LLcVEPAPPR.[H]	1	1	A0A7E5VLE4	A0A7E5VLE4	Methenyltetrahydrofolate synthase domain-containing protein OS=Trichoplusia ni OX=7111 GN=LOC113494764 PE=4 SV=1	2	576.316	1151.62	26.0412	2.18	1.45686e+06
High	A0A7E5VBH2	Dihydrolipoyllysine-residue succinyltransferase component of 2-oxoglutarate dehydrogenase complex, mitochondrial OS=Trichoplusia ni OX=7111 GN=LOC113492358 PE=3 SV=1	FALSE	TRUE	FALSE	5.73248	3	3	3	5.43791e+06	7.47
	Confidence	Annotated Sequence	# Protein Groups	# Proteins	Master Protein Accessions	Protein Accessions	Protein Descriptions	Charge	m/z [Da]	MH+ [Da]	RT [min]	XCorr	Area
	High	[R].EAVLFLR.[K]	1	2	A0A7E5VBH2	A0A7E5VBH2; A0A7E5W2I0	Dihydrolipoyllysine-residue succinyltransferase component of 2-oxoglutarate dehydrogenase complex, mitochondrial OS=Trichoplusia ni OX=7111 GN=LOC113492358 PE=3 SV=1; Dihydrolipoyllysine-residue succinyltransferase component of 2-oxoglutarate dehydrogenase complex, mitochondrial OS=Trichoplusia ni OX=7111 GN=LOC113498769 PE=3 SV=1	2	424.255	847.503	31.4951	2	4.22396e+06
	High	[R].HAQAIETATVK.[V]	1	1	A0A7E5VBH2	A0A7E5VBH2	Dihydrolipoyllysine-residue succinyltransferase component of 2-oxoglutarate dehydrogenase complex, mitochondrial OS=Trichoplusia ni OX=7111 GN=LOC113492358 PE=3 SV=1	2	584.82	1168.63	14.3885	3.37	7.82054e+06
	High	[K].LGLmSPFVK.[A]	1	1	A0A7E5VBH2	A0A7E5VBH2	Dihydrolipoyllysine-residue succinyltransferase component of 2-oxoglutarate dehydrogenase complex, mitochondrial OS=Trichoplusia ni OX=7111 GN=LOC113492358 PE=3 SV=1	2	504.284	1007.56	30.902	2.1	4.26924e+06
High	A0A7E5WPJ6	TRPL translocation defect protein 14 isoform X1 OS=Trichoplusia ni OX=7111 GN=LOC113504543 PE=4 SV=1	FALSE	TRUE	FALSE	9.48617	4	4	4	5.39116e+06	10.66
	Confidence	Annotated Sequence	# Protein Groups	# Proteins	Master Protein Accessions	Protein Accessions	Protein Descriptions	Charge	m/z [Da]	MH+ [Da]	RT [min]	XCorr	Area
	High	[K].EVTGDPAYSmYNLSLK.[E]	1	2	A0A7E5WPJ6	A0A7E5WRA6; A0A7E5WPJ6	TRPL translocation defect protein 14 isoform X2 OS=Trichoplusia ni OX=7111 GN=LOC113504543 PE=4 SV=1; TRPL translocation defect protein 14 isoform X1 OS=Trichoplusia ni OX=7111 GN=LOC113504543 PE=4 SV=1	2	902.429	1803.85	32.684	2.42	2.2656e+06
	High	[R].DYLNLLPQR.[D]	1	2	A0A7E5WPJ6	A0A7E5WRA6; A0A7E5WPJ6	TRPL translocation defect protein 14 isoform X2 OS=Trichoplusia ni OX=7111 GN=LOC113504543 PE=4 SV=1; TRPL translocation defect protein 14 isoform X1 OS=Trichoplusia ni OX=7111 GN=LOC113504543 PE=4 SV=1	2	566.312	1131.62	37	2.04	7.71512e+06
	High	[R].VPETATVLLSGGIK.[F]	1	1	A0A7E5WPJ6	A0A7E5WPJ6	TRPL translocation defect protein 14 isoform X1 OS=Trichoplusia ni OX=7111 GN=LOC113504543 PE=4 SV=1	2	692.906	1384.8	33.5823	3.51	5.57991e+06
	High	[R].DDAHFTIFK.[K]	1	2	A0A7E5WPJ6	A0A7E5WRA6; A0A7E5WPJ6	TRPL translocation defect protein 14 isoform X2 OS=Trichoplusia ni OX=7111 GN=LOC113504543 PE=4 SV=1; TRPL translocation defect protein 14 isoform X1 OS=Trichoplusia ni OX=7111 GN=LOC113504543 PE=4 SV=1	2	547.27	1093.53	29.3428	2.69	2.87845e+06
High	A0A7E5VES6	Ras GTPase-activating protein-binding protein 2 OS=Trichoplusia ni OX=7111 GN=LOC113493164 PE=4 SV=1	FALSE	TRUE	FALSE	10.2506	4	4	4	5.2781e+06	9.89
	Confidence	Annotated Sequence	# Protein Groups	# Proteins	Master Protein Accessions	Protein Accessions	Protein Descriptions	Charge	m/z [Da]	MH+ [Da]	RT [min]	XCorr	Area
	High	[K].YYVHNDIFR.[Y]	1	1	A0A7E5VES6	A0A7E5VES6	Ras GTPase-activating protein-binding protein 2 OS=Trichoplusia ni OX=7111 GN=LOC113493164 PE=4 SV=1	3	409.536	1226.59	25.1077	2.13	3.80993e+06
	High	[R].YQDIVFSDEEGSGSGR.[S]	1	1	A0A7E5VES6	A0A7E5VES6	Ras GTPase-activating protein-binding protein 2 OS=Trichoplusia ni OX=7111 GN=LOC113493164 PE=4 SV=1	2	873.385	1745.76	29.4282	3.06	2.40858e+06
	High	[R].FTQTFVLAAQSPK.[K]	1	1	A0A7E5VES6	A0A7E5VES6	Ras GTPase-activating protein-binding protein 2 OS=Trichoplusia ni OX=7111 GN=LOC113493164 PE=4 SV=1	2	719.391	1437.78	30.838	2.77	3.19055e+06
	High	[R].IQQLNFR.[D]	1	1	A0A7E5VES6	A0A7E5VES6	Ras GTPase-activating protein-binding protein 2 OS=Trichoplusia ni OX=7111 GN=LOC113493164 PE=4 SV=1	2	459.762	918.516	24.1133	1.93	8.83381e+06
High	A0A7E5W0E1	T-complex protein 1 subunit theta OS=Trichoplusia ni OX=7111 GN=LOC113498305 PE=3 SV=1	FALSE	TRUE	FALSE	13.945	7	7	7	5.18206e+06	18.49
	Confidence	Annotated Sequence	# Protein Groups	# Proteins	Master Protein Accessions	Protein Accessions	Protein Descriptions	Charge	m/z [Da]	MH+ [Da]	RT [min]	XCorr	Area
	High	[K].FAVALESIPR.[A]	1	1	A0A7E5W0E1	A0A7E5W0E1	T-complex protein 1 subunit theta OS=Trichoplusia ni OX=7111 GN=LOC113498305 PE=3 SV=1	2	551.816	1102.62	33.2212	2.79	4.02056e+06
	High	[K].SADELLNFSR.[G]	1	1	A0A7E5W0E1	A0A7E5W0E1	T-complex protein 1 subunit theta OS=Trichoplusia ni OX=7111 GN=LOC113498305 PE=3 SV=1	2	576.288	1151.57	32.4725	2.73	5.71773e+06
	High	[K].YAVGAATTILK.[V]	1	1	A0A7E5W0E1	A0A7E5W0E1	T-complex protein 1 subunit theta OS=Trichoplusia ni OX=7111 GN=LOC113498305 PE=3 SV=1	2	554.324	1107.64	28.0332	2.39	3.09201e+06
	High	[K].VAVFScPVDITQTETK.[G]	1	1	A0A7E5W0E1	A0A7E5W0E1	T-complex protein 1 subunit theta OS=Trichoplusia ni OX=7111 GN=LOC113498305 PE=3 SV=1	2	897.951	1794.9	33.5417	3.11	2.09248e+06
	High	[R].ALADNSGANATEVINNIYK.[A]	1	1	A0A7E5W0E1	A0A7E5W0E1	T-complex protein 1 subunit theta OS=Trichoplusia ni OX=7111 GN=LOC113498305 PE=3 SV=1	2	989.498	1977.99	35.0883	2.47	1.94546e+06
	High	[K].TVNATVLPR.[F]	1	1	A0A7E5W0E1	A0A7E5W0E1	T-complex protein 1 subunit theta OS=Trichoplusia ni OX=7111 GN=LOC113498305 PE=3 SV=1	2	485.788	970.568	21.9946	2.48	5807887
	High	[R].KFAVALESIPR.[A]	1	1	A0A7E5W0E1	A0A7E5W0E1	T-complex protein 1 subunit theta OS=Trichoplusia ni OX=7111 GN=LOC113498305 PE=3 SV=1	3	410.912	1230.72	28.1904	2.51	433384
High	A9XXA7	Elongation factor 1-alpha OS=Trichoplusia ni OX=7111 GN=LOC113501794 PE=2 SV=1	FALSE	TRUE	FALSE	8.85529	4	4	4	5.182e+06	9.11
	Confidence	Annotated Sequence	# Protein Groups	# Proteins	Master Protein Accessions	Protein Accessions	Protein Descriptions	Charge	m/z [Da]	MH+ [Da]	RT [min]	XCorr	Area
	High	[K].QLIVGVNK.[M]	1	2	A9XXA7	A9XXA7; A0A7E5VD14	Elongation factor 1-alpha OS=Trichoplusia ni OX=7111 GN=LOC113501794 PE=2 SV=1; Elongation factor 1-alpha OS=Trichoplusia ni OX=7111 GN=LOC113492739 PE=3 SV=1	2	435.774	870.541	21.973	2.3	3.43706e+06
	High	[K].IGGIGTVPVGR.[V]	1	2	A9XXA7	A9XXA7; A0A7E5VD14	Elongation factor 1-alpha OS=Trichoplusia ni OX=7111 GN=LOC113501794 PE=2 SV=1; Elongation factor 1-alpha OS=Trichoplusia ni OX=7111 GN=LOC113492739 PE=3 SV=1	2	513.309	1025.61	25.9969	2.44	8.57227e+06
	High	[K].YYVTIIDAPGHR.[D]	1	2	A9XXA7	A9XXA7; A0A7E5VD14	Elongation factor 1-alpha OS=Trichoplusia ni OX=7111 GN=LOC113501794 PE=2 SV=1; Elongation factor 1-alpha OS=Trichoplusia ni OX=7111 GN=LOC113492739 PE=3 SV=1	3	468.914	1404.73	27.5604	2.02	3.53667e+06
	High	[K].STTTGHLIYK.[C]	1	2	A9XXA7	A9XXA7; A0A7E5VD14	Elongation factor 1-alpha OS=Trichoplusia ni OX=7111 GN=LOC113501794 PE=2 SV=1; Elongation factor 1-alpha OS=Trichoplusia ni OX=7111 GN=LOC113492739 PE=3 SV=1	2	560.804	1120.6	16.4988	2.35	1.6163e+06
High	A0A7E5VK44	Tubulin beta chain OS=Trichoplusia ni OX=7111 GN=LOC113494443 PE=3 SV=1	FALSE	TRUE	FALSE	12.7232	5	6	3	5.09568e+06	14.77
	Confidence	Annotated Sequence	# Protein Groups	# Proteins	Master Protein Accessions	Protein Accessions	Protein Descriptions	Charge	m/z [Da]	MH+ [Da]	RT [min]	XCorr	Area
	High	[R].FPGQLNADLR.[K]	2	11	A0A7E5X5Y1; A0A7E5VK44	A0A7E5VDZ1; A0A7E5X5Y1; A0A7E5VK44; A0A7E5V8B9; A0A7E5VE36; A0A7E5VJT1; A0A7E5VE58; E1BJK2; A0A7E5VJS6; A0A7E5X115; A0A7E5VJV7	Tubulin beta chain OS=Trichoplusia ni OX=7111 GN=LOC113492970 PE=3 SV=1; Tubulin beta chain OS=Trichoplusia ni OX=7111 GN=LOC113508948 PE=3 SV=1; Tubulin beta chain OS=Trichoplusia ni OX=7111 GN=LOC113494443 PE=3 SV=1; Tubulin beta chain OS=Trichoplusia ni OX=7111 GN=LOC113491657 PE=3 SV=1; Tubulin beta chain OS=Trichoplusia ni OX=7111 GN=LOC113492972 PE=3 SV=1; Tubulin beta chain OS=Trichoplusia…	2	565.801	1130.6	28.4777	2.11	1.95739e+06
	High	[R].INVYYNEASGGK.[Y]	2	5	A0A7E5X5Y1; A0A7E5VK44	A0A7E5X5Y1; A0A7E5VK44; A0A7E5VE36; A0A7E5VE58; A0A7E5VJV7	Tubulin beta chain OS=Trichoplusia ni OX=7111 GN=LOC113508948 PE=3 SV=1; Tubulin beta chain OS=Trichoplusia ni OX=7111 GN=LOC113494443 PE=3 SV=1; Tubulin beta chain OS=Trichoplusia ni OX=7111 GN=LOC113492972 PE=3 SV=1; Tubulin beta chain OS=Trichoplusia ni OX=7111 GN=LOC113492971 PE=3 SV=1; Tubulin beta chain OS=Trichoplusia ni OX=7111 GN=LOC113494444 PE=3 SV=1	2	657.82	1314.63	23.3697	3.09	18519585
	High	[R].YLTVAAIFR.[G]	1	6	A0A7E5VK44	A0A7E5VDZ1; A0A7E5VK44; A0A7E5V8B9; A0A7E5VJT1; A0A7E5VJS6; A0A7E5VJV7	Tubulin beta chain OS=Trichoplusia ni OX=7111 GN=LOC113492970 PE=3 SV=1; Tubulin beta chain OS=Trichoplusia ni OX=7111 GN=LOC113494443 PE=3 SV=1; Tubulin beta chain OS=Trichoplusia ni OX=7111 GN=LOC113491657 PE=3 SV=1; Tubulin beta chain OS=Trichoplusia ni OX=7111 GN=LOC113494450 PE=3 SV=1; Tubulin beta chain OS=Trichoplusia ni OX=7111 GN=LOC113494447 PE=3 SV=1; Tubulin beta chain OS=Trichoplusia…	2	527.309	1053.61	37.5614	2.14	3.59817e+06
	High	[R].FPGQLNADLR.[K]	2	11	A0A7E5X5Y1; A0A7E5VK44	A0A7E5VDZ1; A0A7E5X5Y1; A0A7E5VK44; A0A7E5V8B9; A0A7E5VE36; A0A7E5VJT1; A0A7E5VE58; E1BJK2; A0A7E5VJS6; A0A7E5X115; A0A7E5VJV7	Tubulin beta chain OS=Trichoplusia ni OX=7111 GN=LOC113492970 PE=3 SV=1; Tubulin beta chain OS=Trichoplusia ni OX=7111 GN=LOC113508948 PE=3 SV=1; Tubulin beta chain OS=Trichoplusia ni OX=7111 GN=LOC113494443 PE=3 SV=1; Tubulin beta chain OS=Trichoplusia ni OX=7111 GN=LOC113491657 PE=3 SV=1; Tubulin beta chain OS=Trichoplusia ni OX=7111 GN=LOC113492972 PE=3 SV=1; Tubulin beta chain OS=Trichoplusia…	2	565.802	1130.6	29.2637	2.24	395713
	High	[K].NSSYFVEWIPNNVK.[TV]	1	4	A0A7E5VK44	A0A7E5VK44; A0A7E5V8B9; A0A7E5X115; A0A7E5VJV7	Tubulin beta chain OS=Trichoplusia ni OX=7111 GN=LOC113494443 PE=3 SV=1; Tubulin beta chain OS=Trichoplusia ni OX=7111 GN=LOC113491657 PE=3 SV=1; Tubulin beta chain OS=Trichoplusia ni OX=7111 GN=LOC113507665 PE=3 SV=1; Tubulin beta chain OS=Trichoplusia ni OX=7111 GN=LOC113494444 PE=3 SV=1	2	848.92	1696.83	39.0926	2.5	1.45883e+06
High	A0A7E5W1T4	Importin subunit alpha OS=Trichoplusia ni OX=7111 GN=LOC113498599 PE=3 SV=1	FALSE	TRUE	FALSE	8.46457	3	3	1	5.01479e+06	7.26
	Confidence	Annotated Sequence	# Protein Groups	# Proteins	Master Protein Accessions	Protein Accessions	Protein Descriptions	Charge	m/z [Da]	MH+ [Da]	RT [min]	XCorr	Area
	High	[K].VLTPEEIVQGLR.[A]	1	1	A0A7E5W1T4	A0A7E5W1T4	Importin subunit alpha OS=Trichoplusia ni OX=7111 GN=LOC113498599 PE=3 SV=1	2	677.391	1353.77	39.61	2.76	5.01479e+06
	High	[R].ALGNmLTGSDEQTDR.[C]	2	2	A0A7E5W2I6; A0A7E5W1T4	A0A7E5W2I6; A0A7E5W1T4	Importin subunit alpha OS=Trichoplusia ni OX=7111 GN=LOC113498599 PE=3 SV=1; Importin subunit alpha OS=Trichoplusia ni OX=7111 GN=LOC113498599 PE=3 SV=1	2	812.367	1623.73	22.0651	2.44	1.39878e+06
	Medium	[R].ALSPEAGEEIIDHTEK.[V]	2	2	A0A7E5W2I6; A0A7E5W1T4	A0A7E5W2I6; A0A7E5W1T4	Importin subunit alpha OS=Trichoplusia ni OX=7111 GN=LOC113498599 PE=3 SV=1; Importin subunit alpha OS=Trichoplusia ni OX=7111 GN=LOC113498599 PE=3 SV=1	3	580.289	1738.85	28.2019	2.06	8.35893e+06
High	A0A7E5WAY7	Protein disulfide-isomerase OS=Trichoplusia ni OX=7111 GN=LOC113501048 PE=3 SV=1	FALSE	TRUE	FALSE	12.3482	5	5	5	4.84497e+06	14.25
	Confidence	Annotated Sequence	# Protein Groups	# Proteins	Master Protein Accessions	Protein Accessions	Protein Descriptions	Charge	m/z [Da]	MH+ [Da]	RT [min]	XCorr	Area
	High	[K].VDATQEQELAESYGVR.[G]	1	1	A0A7E5WAY7	A0A7E5WAY7	Protein disulfide-isomerase OS=Trichoplusia ni OX=7111 GN=LOC113501048 PE=3 SV=1	2	897.928	1794.85	32.2605	3.6	4.3259e+06
	High	[K].mDATANELEHTK.[I]	1	1	A0A7E5WAY7	A0A7E5WAY7	Protein disulfide-isomerase OS=Trichoplusia ni OX=7111 GN=LOC113501048 PE=3 SV=1	2	688.312	1375.62	16.4113	3.06	868543
	High	[K].TGPPAIEVTSAEQAK.[E]	1	1	A0A7E5WAY7	A0A7E5WAY7	Protein disulfide-isomerase OS=Trichoplusia ni OX=7111 GN=LOC113501048 PE=3 SV=1	2	749.893	1498.78	24.868	3.52	6.6349e+06
	High	[K].DDDVVIAK.[M]	1	1	A0A7E5WAY7	A0A7E5WAY7	Protein disulfide-isomerase OS=Trichoplusia ni OX=7111 GN=LOC113501048 PE=3 SV=1	2	437.73	874.452	20.9814	1.81	1.42311e+06
	High	[R].QADDIITWLK.[K]	1	1	A0A7E5WAY7	A0A7E5WAY7	Protein disulfide-isomerase OS=Trichoplusia ni OX=7111 GN=LOC113501048 PE=3 SV=1	2	601.824	1202.64	39.1382	2.25	3.57411e+06
High	A0A7E5WPX5	Thioredoxin reductase 1, mitochondrial isoform X1 OS=Trichoplusia ni OX=7111 GN=LOC113504568 PE=3 SV=1	FALSE	TRUE	FALSE	6.95489	3	3	3	4.68474e+06	7.57
	Confidence	Annotated Sequence	# Protein Groups	# Proteins	Master Protein Accessions	Protein Accessions	Protein Descriptions	Charge	m/z [Da]	MH+ [Da]	RT [min]	XCorr	Area
	High	[K].VAVLDYVTPSPQGTK.[W]	1	4	A0A7E5WPX5	A0A7E5WPP3; A0A7E5WQW1; A0A7E5WPX5; A0A7E5WRF1	Thioredoxin reductase 1, mitochondrial isoform X2 OS=Trichoplusia ni OX=7111 GN=LOC113504568 PE=3 SV=1; Thioredoxin reductase 1, mitochondrial isoform X4 OS=Trichoplusia ni OX=7111 GN=LOC113504568 PE=3 SV=1; Thioredoxin reductase 1, mitochondrial isoform X1 OS=Trichoplusia ni OX=7111 GN=LOC113504568 PE=3 SV=1; Thioredoxin reductase 1, mitochondrial isoform X3 OS=Trichoplusia ni OX=7111 GN=LOC1135…	2	787.925	1574.84	32.0952	2.93	9.36965e+06
	High	[K].ISWAALTESVQNHIK.[S]	1	4	A0A7E5WPX5	A0A7E5WPP3; A0A7E5WQW1; A0A7E5WPX5; A0A7E5WRF1	Thioredoxin reductase 1, mitochondrial isoform X2 OS=Trichoplusia ni OX=7111 GN=LOC113504568 PE=3 SV=1; Thioredoxin reductase 1, mitochondrial isoform X4 OS=Trichoplusia ni OX=7111 GN=LOC113504568 PE=3 SV=1; Thioredoxin reductase 1, mitochondrial isoform X1 OS=Trichoplusia ni OX=7111 GN=LOC113504568 PE=3 SV=1; Thioredoxin reductase 1, mitochondrial isoform X3 OS=Trichoplusia ni OX=7111 GN=LOC1135…	3	566.306	1696.9	36.6026	2.4	971804
	High	[K].SVNWVTR.[V]	1	4	A0A7E5WPX5	A0A7E5WPP3; A0A7E5WQW1; A0A7E5WPX5; A0A7E5WRF1	Thioredoxin reductase 1, mitochondrial isoform X2 OS=Trichoplusia ni OX=7111 GN=LOC113504568 PE=3 SV=1; Thioredoxin reductase 1, mitochondrial isoform X4 OS=Trichoplusia ni OX=7111 GN=LOC113504568 PE=3 SV=1; Thioredoxin reductase 1, mitochondrial isoform X1 OS=Trichoplusia ni OX=7111 GN=LOC113504568 PE=3 SV=1; Thioredoxin reductase 1, mitochondrial isoform X3 OS=Trichoplusia ni OX=7111 GN=LOC1135…	2	431.233	861.458	22.292	2.23	3.71277e+06
High	A0A7E5VQC0	Failed axon connections OS=Trichoplusia ni OX=7111 GN=LOC113495770 PE=3 SV=1	FALSE	TRUE	FALSE	13.4921	4	4	4	4.52945e+06	10.63
	Confidence	Annotated Sequence	# Protein Groups	# Proteins	Master Protein Accessions	Protein Accessions	Protein Descriptions	Charge	m/z [Da]	MH+ [Da]	RT [min]	XCorr	Area
	High	[K].DLDAALTPEQR.[V]	1	1	A0A7E5VQC0	A0A7E5VQC0	Failed axon connections OS=Trichoplusia ni OX=7111 GN=LOC113495770 PE=3 SV=1	2	614.812	1228.62	28.3774	3.31	7.58984e+06
	High	[R].DGmNESFPNLVGLVSR.[I]	1	1	A0A7E5VQC0	A0A7E5VQC0	Failed axon connections OS=Trichoplusia ni OX=7111 GN=LOC113495770 PE=3 SV=1	2	875.926	1750.84	42.9544	2.45	1.79899e+06
	High	[K].VATEDAPADNGQTK.[E]	1	1	A0A7E5VQC0	A0A7E5VQC0	Failed axon connections OS=Trichoplusia ni OX=7111 GN=LOC113495770 PE=3 SV=1	2	708.834	1416.66	14.919	2.63	3.71998e+06
	High	[K].DVVYLYQFSR.[T]	1	1	A0A7E5VQC0	A0A7E5VQC0	Failed axon connections OS=Trichoplusia ni OX=7111 GN=LOC113495770 PE=3 SV=1	2	645.331	1289.66	37.9521	2.24	2.27854e+06
High	A0A7E5VM91	RuvB-like helicase OS=Trichoplusia ni OX=7111 GN=LOC113495045 PE=3 SV=1	FALSE	TRUE	FALSE	6.79825	3	3	3	4.48264e+06	5.66
	Confidence	Annotated Sequence	# Protein Groups	# Proteins	Master Protein Accessions	Protein Accessions	Protein Descriptions	Charge	m/z [Da]	MH+ [Da]	RT [min]	XCorr	Area
	High	[K].LDPTIYESLQK.[E]	1	1	A0A7E5VM91	A0A7E5VM91	RuvB-like helicase OS=Trichoplusia ni OX=7111 GN=LOC113495045 PE=3 SV=1	2	653.849	1306.69	32.1221	2.82	4.49548e+06
	High	[R].ALLFAGPPGTGK.[T]	1	1	A0A7E5VM91	A0A7E5VM91	RuvB-like helicase OS=Trichoplusia ni OX=7111 GN=LOC113495045 PE=3 SV=1	2	564.825	1128.64	30.8183	2.83	4.87481e+06
	Medium	[K].AELLQILK.[L]	1	1	A0A7E5VM91	A0A7E5VM91	RuvB-like helicase OS=Trichoplusia ni OX=7111 GN=LOC113495045 PE=3 SV=1	2	464.297	927.587	33.7144	1.42	4.07762e+06
High	A0A7E5WB64	Retinal dehydrogenase 1-like OS=Trichoplusia ni OX=7111 GN=LOC113500921 PE=3 SV=1	FALSE	TRUE	FALSE	10.6996	5	5	5	4.30114e+06	11.02
	Confidence	Annotated Sequence	# Protein Groups	# Proteins	Master Protein Accessions	Protein Accessions	Protein Descriptions	Charge	m/z [Da]	MH+ [Da]	RT [min]	XCorr	Area
	High	[KR].EEIFGPVQSILK.[F]	1	7	A0A7E5WB64	A0A7E5WB64; A0A7E5VWD7; A0A7E5WAI0; A0A7E5VVR5; A0A7E5VVX7; A0A7E5WBZ0; A0A7E5WAD9	Retinal dehydrogenase 1-like OS=Trichoplusia ni OX=7111 GN=LOC113500921 PE=3 SV=1; Aldehyde dehydrogenase X, mitochondrial-like isoform X2 OS=Trichoplusia ni OX=7111 GN=LOC113497199 PE=3 SV=1; Retinal dehydrogenase 1-like OS=Trichoplusia ni OX=7111 GN=LOC113500923 PE=3 SV=1; Aldehyde dehydrogenase X, mitochondrial-like isoform X1 OS=Trichoplusia ni OX=7111 GN=LOC113497199 PE=3 SV=1; Aldehyde dehy…	2	680.38	1359.75	39.5992	2.77	4.27943e+06
	High	[R].VTLELGGK.[S]	1	7	A0A7E5WB64	A0A7E5WB64; A0A7E5VWD7; A0A7E5WAI0; A0A7E5VVR5; A0A7E5VVX7; A0A7E5WBZ0; A0A7E5WAD9	Retinal dehydrogenase 1-like OS=Trichoplusia ni OX=7111 GN=LOC113500921 PE=3 SV=1; Aldehyde dehydrogenase X, mitochondrial-like isoform X2 OS=Trichoplusia ni OX=7111 GN=LOC113497199 PE=3 SV=1; Retinal dehydrogenase 1-like OS=Trichoplusia ni OX=7111 GN=LOC113500923 PE=3 SV=1; Aldehyde dehydrogenase X, mitochondrial-like isoform X1 OS=Trichoplusia ni OX=7111 GN=LOC113497199 PE=3 SV=1; Aldehyde dehy…	2	408.745	816.482	23.5206	2.09	4.39999e+06
	High	[K].LFIDNEWVDSVSGK.[T]	1	3	A0A7E5WB64	A0A7E5WB64; A0A7E5WAI0; A0A7E5WBZ0	Retinal dehydrogenase 1-like OS=Trichoplusia ni OX=7111 GN=LOC113500921 PE=3 SV=1; Retinal dehydrogenase 1-like OS=Trichoplusia ni OX=7111 GN=LOC113500923 PE=3 SV=1; Retinal dehydrogenase 1-like OS=Trichoplusia ni OX=7111 GN=LOC113500920 PE=3 SV=1	2	804.899	1608.79	39.9382	1.73
	High	[K].FVEAAVQFAK.[A]	1	1	A0A7E5WB64	A0A7E5WB64	Retinal dehydrogenase 1-like OS=Trichoplusia ni OX=7111 GN=LOC113500921 PE=3 SV=1	2	555.302	1109.6	28.4982	2.28	4.224e+06
	High	[K].ADVDLAVK.[A]	1	1	A0A7E5WB64	A0A7E5WB64	Retinal dehydrogenase 1-like OS=Trichoplusia ni OX=7111 GN=LOC113500921 PE=3 SV=1	2	415.734	830.461	21.8381	2.16	588873
High	A0A7E5WQB7	Cyclin-T-like OS=Trichoplusia ni OX=7111 GN=LOC113504303 PE=3 SV=1	FALSE	TRUE	FALSE	5.84577	3	3	3	4.29289e+06	9.17
	Confidence	Annotated Sequence	# Protein Groups	# Proteins	Master Protein Accessions	Protein Accessions	Protein Descriptions	Charge	m/z [Da]	MH+ [Da]	RT [min]	XCorr	Area
	High	[K].IDETPGYENVIR.[D]	1	1	A0A7E5WQB7	A0A7E5WQB7	Cyclin-T-like OS=Trichoplusia ni OX=7111 GN=LOC113504303 PE=3 SV=1	2	703.351	1405.69	28.553	2.49	685895
	High	[R].TRPPSLFSPENATTPTAAAAAAPR.[R]	1	1	A0A7E5WQB7	A0A7E5WQB7	Cyclin-T-like OS=Trichoplusia ni OX=7111 GN=LOC113504303 PE=3 SV=1	3	799.084	2395.24	29.5004	4.67	1.12005e+07
	Medium	[K].HPQSSVDEIDK.[S]	1	1	A0A7E5WQB7	A0A7E5WQB7	Cyclin-T-like OS=Trichoplusia ni OX=7111 GN=LOC113504303 PE=3 SV=1	2	627.802	1254.6	15.0034	2.01	992239
High	P42212	Green fluorescent protein OS=Aequorea victoria GN=GFP PE=1 SV=1	TRUE	FALSE	FALSE	7.56303	2	2	2	4.13746e+06	5.1
	Confidence	Annotated Sequence	# Protein Groups	# Proteins	Master Protein Accessions	Protein Accessions	Protein Descriptions	Charge	m/z [Da]	MH+ [Da]	RT [min]	XCorr	Area
	High	[K].EDGNILGHK.[L]	1	1	P42212	P42212	Green fluorescent protein OS=Aequorea victoria GN=GFP PE=1 SV=1	2	491.751	982.496	15.6503	2.61	987972
	High	[K].FEGDTLVNR.[I]	1	1	P42212	P42212	Green fluorescent protein OS=Aequorea victoria GN=GFP PE=1 SV=1	2	525.765	1050.52	23.9852	2.5	7.28695e+06
High	A0A7E5VIH8	Protein CASC3 OS=Trichoplusia ni OX=7111 GN=LOC113494111 PE=3 SV=1	FALSE	TRUE	FALSE	9.59666	4	4	4	3.90254e+06	12.59
	Confidence	Annotated Sequence	# Protein Groups	# Proteins	Master Protein Accessions	Protein Accessions	Protein Descriptions	Charge	m/z [Da]	MH+ [Da]	RT [min]	XCorr	Area
	High	[R].RPTAAIPIVSPHHADRPANSSEK.[D]	1	1	A0A7E5VIH8	A0A7E5VIH8	Protein CASC3 OS=Trichoplusia ni OX=7111 GN=LOC113494111 PE=3 SV=1	4	613.577	2451.29	17.1399	3.23	5.99086e+06
	High	[R].AGPHAPSPPQTHAPQVR.[L]	1	5	A0A7E5VIH8	A0A7E5VIB1; A0A7E5VIP1; A0A7E5VIB9; A0A7E5VIH8; A0A7E5VIA3	Protein CASC3 OS=Trichoplusia ni OX=7111 GN=LOC113494111 PE=3 SV=1; Protein CASC3 OS=Trichoplusia ni OX=7111 GN=LOC113494111 PE=3 SV=1; Protein CASC3 OS=Trichoplusia ni OX=7111 GN=LOC113494111 PE=3 SV=1; Protein CASC3 OS=Trichoplusia ni OX=7111 GN=LOC113494111 PE=3 SV=1; Protein CASC3 OS=Trichoplusia ni OX=7111 GN=LOC113494111 PE=3 SV=1	4	437.73	1747.9	17.4768	3.23	2.74009e+06
	High	[R].KPNTNHAQPSPQSNPPR.[N]	1	5	A0A7E5VIH8	A0A7E5VIB1; A0A7E5VIP1; A0A7E5VIB9; A0A7E5VIH8; A0A7E5VIA3	Protein CASC3 OS=Trichoplusia ni OX=7111 GN=LOC113494111 PE=3 SV=1; Protein CASC3 OS=Trichoplusia ni OX=7111 GN=LOC113494111 PE=3 SV=1; Protein CASC3 OS=Trichoplusia ni OX=7111 GN=LOC113494111 PE=3 SV=1; Protein CASC3 OS=Trichoplusia ni OX=7111 GN=LOC113494111 PE=3 SV=1; Protein CASC3 OS=Trichoplusia ni OX=7111 GN=LOC113494111 PE=3 SV=1	3	623.983	1869.93	11.9861	3.17	874451
	Medium	[R].KPWPATHGADSK.[D]	1	1	A0A7E5VIH8	A0A7E5VIH8	Protein CASC3 OS=Trichoplusia ni OX=7111 GN=LOC113494111 PE=3 SV=1	3	432.223	1294.65	12.4795	2.96	2.97668e+06
High	P13647	Keratin, type II cytoskeletal 5 OS=Homo sapiens GN=KRT5 PE=1 SV=3	TRUE	FALSE	FALSE	14.9153	9	11	5	3.54361e+06	28.15
	Confidence	Annotated Sequence	# Protein Groups	# Proteins	Master Protein Accessions	Protein Accessions	Protein Descriptions	Charge	m/z [Da]	MH+ [Da]	RT [min]	XCorr	Area
	High	[K].QcANLQNAIADAEQR.[G]	1	2	P13647	Q5XQN5; P13647	Keratin, type II cytoskeletal 5 OS=Bos taurus GN=KRT5 PE=1 SV=1; Keratin, type II cytoskeletal 5 OS=Homo sapiens GN=KRT5 PE=1 SV=3	2	851.403	1701.8	29.9287	3.01
	High	[R].NLDLDSIIAEVK.[A]	3	8	P35908; P04259; P13647	Q5XKE5; P35908; P04259; P02538; O95678; Q8VED5; P48668; P13647	Keratin, type II cytoskeletal 79 OS=Homo sapiens GN=KRT79 PE=1 SV=2; Keratin, type II cytoskeletal 2 epidermal OS=Homo sapiens GN=KRT2 PE=1 SV=2; Keratin, type II cytoskeletal 6B OS=Homo sapiens GN=KRT6B PE=1 SV=5; Keratin, type II cytoskeletal 6A OS=Homo sapiens GN=KRT6A PE=1 SV=3; Keratin, type II cytoskeletal 75 OS=Homo sapiens GN=KRT75 PE=1 SV=2; Keratin, type II cytoskeletal 79 OS=Mus muscul…	2	665.367	1329.73	43.6741	2.17	3.34801e+06
	High	[KR].NKYEDEINKR.[T]	3	11	P04264; P04259; P13647	H-INV:HIT000016045; P04264; P04259; P02538; Q8VED5; Q5XQN5; P48668; Q6IFZ6; P05787; Q922U2; P13647	Tax_Id=9606 Gene_Symbol=- Similar to Keratin, type II cytoskeletal 8 [OS=Homo sapiens]; Keratin, type II cytoskeletal 1 OS=Homo sapiens GN=KRT1 PE=1 SV=6; Keratin, type II cytoskeletal 6B OS=Homo sapiens GN=KRT6B PE=1 SV=5; Keratin, type II cytoskeletal 6A OS=Homo sapiens GN=KRT6A PE=1 SV=3; Keratin, type II cytoskeletal 79 OS=Mus musculus GN=Krt79 PE=2 SV=2; Keratin, type II cytoskeletal 5 OS=Bo…	3	436.89	1308.65	15.3142	2.94	89241568
	High	[R].ISISTSGGSFR.[N]	1	1	P13647	P13647	Keratin, type II cytoskeletal 5 OS=Homo sapiens GN=KRT5 PE=1 SV=3	2	556.291	1111.57	25.4483	2.82
	High	[KR].NKYEDEINKR.[T]	3	11	P04264; P04259; P13647	H-INV:HIT000016045; P04264; P04259; P02538; Q8VED5; Q5XQN5; P48668; Q6IFZ6; P05787; Q922U2; P13647	Tax_Id=9606 Gene_Symbol=- Similar to Keratin, type II cytoskeletal 8 [OS=Homo sapiens]; Keratin, type II cytoskeletal 1 OS=Homo sapiens GN=KRT1 PE=1 SV=6; Keratin, type II cytoskeletal 6B OS=Homo sapiens GN=KRT6B PE=1 SV=5; Keratin, type II cytoskeletal 6A OS=Homo sapiens GN=KRT6A PE=1 SV=3; Keratin, type II cytoskeletal 79 OS=Mus musculus GN=Krt79 PE=2 SV=2; Keratin, type II cytoskeletal 5 OS=Bo…	2	654.831	1308.65	15.3276	2.81	5.99091e+06
	High	[R].EYQELMNTK.[L]	1	3	P13647	Q5XQN5; Q922U2; P13647	Keratin, type II cytoskeletal 5 OS=Bos taurus GN=KRT5 PE=1 SV=1; Keratin, type II cytoskeletal 5 OS=Mus musculus GN=Krt5 PE=1 SV=1; Keratin, type II cytoskeletal 5 OS=Homo sapiens GN=KRT5 PE=1 SV=3	2	578.271	1155.54	23.0366	2.25	1.63289e+06
	High	[R].VSLAGAcGVGGYGSR.[S]	1	1	P13647	P13647	Keratin, type II cytoskeletal 5 OS=Homo sapiens GN=KRT5 PE=1 SV=3	2	705.843	1410.68	26.0719	3.72	1.17877e+06
	High	[KR].NKYEDEINKR.[T]	3	11	P04264; P04259; P13647	H-INV:HIT000016045; P04264; P04259; P02538; Q8VED5; Q5XQN5; P48668; Q6IFZ6; P05787; Q922U2; P13647	Tax_Id=9606 Gene_Symbol=- Similar to Keratin, type II cytoskeletal 8 [OS=Homo sapiens]; Keratin, type II cytoskeletal 1 OS=Homo sapiens GN=KRT1 PE=1 SV=6; Keratin, type II cytoskeletal 6B OS=Homo sapiens GN=KRT6B PE=1 SV=5; Keratin, type II cytoskeletal 6A OS=Homo sapiens GN=KRT6A PE=1 SV=3; Keratin, type II cytoskeletal 79 OS=Mus musculus GN=Krt79 PE=2 SV=2; Keratin, type II cytoskeletal 5 OS=Bo…	3	436.889	1308.65	15.8629	2.24
	High	[K].AQYEEIANR.[S]	1	1	P13647	P13647	Keratin, type II cytoskeletal 5 OS=Homo sapiens GN=KRT5 PE=1 SV=3	2	547.267	1093.53	19.6764	2.09	7.81916e+06
	High	[K].FASFIDK.[V]	3	28	P35908; P04259; P13647	Q5XKE5; P08729; Q7Z794; Q7RTS7; Q3TTY5; P35908; Q9R0H5; Q6NXH9; P04259; P02538; Q01546; O95678; P50446; Q6IME9; Q8BGZ7; Q8VED5; Q5XQN5; P48668; P07744; Q9NSB2; P12035; Q6IFZ6; Q9DCV7; Q3SY84; P19013; P05787; Q922U2; P13647	Keratin, type II cytoskeletal 79 OS=Homo sapiens GN=KRT79 PE=1 SV=2; Keratin, type II cytoskeletal 7 OS=Homo sapiens GN=KRT7 PE=1 SV=5; Keratin, type II cytoskeletal 1b OS=Homo sapiens GN=KRT77 PE=2 SV=3; Keratin, type II cytoskeletal 74 OS=Homo sapiens GN=KRT74 PE=1 SV=2; Keratin, type II cytoskeletal 2 epidermal OS=Mus musculus GN=Krt2 PE=1 SV=1; Keratin, type II cytoskeletal 2 epidermal OS=Hom…	2	414.219	827.43	26.2003	2.03
	High	[KR].NKYEDEINK.[HR]	3	13	P04264; P04259; P13647	Q5XKE5; H-INV:HIT000016045; P04264; P04259; P02538; Q8VED5; Q5XQN5; P48668; Q6IFZ6; H-INV:HIT000292931; P05787; Q922U2; P13647	Keratin, type II cytoskeletal 79 OS=Homo sapiens GN=KRT79 PE=1 SV=2; Tax_Id=9606 Gene_Symbol=- Similar to Keratin, type II cytoskeletal 8 [OS=Homo sapiens]; Keratin, type II cytoskeletal 1 OS=Homo sapiens GN=KRT1 PE=1 SV=6; Keratin, type II cytoskeletal 6B OS=Homo sapiens GN=KRT6B PE=1 SV=5; Keratin, type II cytoskeletal 6A OS=Homo sapiens GN=KRT6A PE=1 SV=3; Keratin, type II cytoskeletal 79 OS=M…	2	576.779	1152.55	15.869	2.07	1.02627e+06
High	A0A7E5WVR9	Heat shock 70 kDa protein 14 OS=Trichoplusia ni OX=7111 GN=LOC113505648 PE=3 SV=1	FALSE	TRUE	FALSE	5.72034	2	2	2	2.9298e+06	4.88
	Confidence	Annotated Sequence	# Protein Groups	# Proteins	Master Protein Accessions	Protein Accessions	Protein Descriptions	Charge	m/z [Da]	MH+ [Da]	RT [min]	XCorr	Area
	High	[K].LVLAAPLHWSTASTER.[L]	1	1	A0A7E5WVR9	A0A7E5WVR9	Heat shock 70 kDa protein 14 OS=Trichoplusia ni OX=7111 GN=LOC113505648 PE=3 SV=1	3	584.653	1751.94	32.3868	2.76	2.79436e+06
	High	[K].VIESFGGQIHK.[I]	1	1	A0A7E5WVR9	A0A7E5WVR9	Heat shock 70 kDa protein 14 OS=Trichoplusia ni OX=7111 GN=LOC113505648 PE=3 SV=1	3	405.556	1214.65	21.1835	2.12	3.06524e+06
High	A0A7E5WJM6	Zinc finger RNA-binding protein isoform X1 OS=Trichoplusia ni OX=7111 GN=LOC113503285 PE=4 SV=1	FALSE	TRUE	FALSE	2.90011	2	2	2	2.77183e+06	4.96
	Confidence	Annotated Sequence	# Protein Groups	# Proteins	Master Protein Accessions	Protein Accessions	Protein Descriptions	Charge	m/z [Da]	MH+ [Da]	RT [min]	XCorr	Area
	High	[R].EDLTASAQQFLR.[Q]	1	6	A0A7E5WJM6	A0A7E5WJM6; A0A7E5WJG7; A0A7E5WKS5; A0A7E5WJR4; A0A7E5WLD9; A0A7E5WJR8	Zinc finger RNA-binding protein isoform X1 OS=Trichoplusia ni OX=7111 GN=LOC113503285 PE=4 SV=1; Zinc finger RNA-binding protein isoform X3 OS=Trichoplusia ni OX=7111 GN=LOC113503285 PE=4 SV=1; Zinc finger RNA-binding protein isoform X5 OS=Trichoplusia ni OX=7111 GN=LOC113503285 PE=4 SV=1; Zinc finger RNA-binding protein isoform X2 OS=Trichoplusia ni OX=7111 GN=LOC113503285 PE=4 SV=1; Zinc finger…	2	689.852	1378.7	35.4642	2.8	5.39247e+06
	High	[R].SNTDADADTPNGEGK.[V]	1	6	A0A7E5WJM6	A0A7E5WJM6; A0A7E5WJG7; A0A7E5WKS5; A0A7E5WJR4; A0A7E5WLD9; A0A7E5WJR8	Zinc finger RNA-binding protein isoform X1 OS=Trichoplusia ni OX=7111 GN=LOC113503285 PE=4 SV=1; Zinc finger RNA-binding protein isoform X3 OS=Trichoplusia ni OX=7111 GN=LOC113503285 PE=4 SV=1; Zinc finger RNA-binding protein isoform X5 OS=Trichoplusia ni OX=7111 GN=LOC113503285 PE=4 SV=1; Zinc finger RNA-binding protein isoform X2 OS=Trichoplusia ni OX=7111 GN=LOC113503285 PE=4 SV=1; Zinc finger…	2	746.314	1491.62	14.3493	2.17	151191
High	A0A7E5VCN0	Cytosolic non-specific dipeptidase OS=Trichoplusia ni OX=7111 GN=LOC113492664 PE=3 SV=1	FALSE	TRUE	FALSE	7.74059	3	3	3	2.70307e+06	7.28
	Confidence	Annotated Sequence	# Protein Groups	# Proteins	Master Protein Accessions	Protein Accessions	Protein Descriptions	Charge	m/z [Da]	MH+ [Da]	RT [min]	XCorr	Area
	High	[K].GIGEELPVNLK.[F]	1	1	A0A7E5VCN0	A0A7E5VCN0	Cytosolic non-specific dipeptidase OS=Trichoplusia ni OX=7111 GN=LOC113492664 PE=3 SV=1	2	584.833	1168.66	31.9048	1.74	2.82637e+06
	High	[K].LPPVLVGVLGNDPK.[K]	1	1	A0A7E5VCN0	A0A7E5VCN0	Cytosolic non-specific dipeptidase OS=Trichoplusia ni OX=7111 GN=LOC113492664 PE=3 SV=1	3	473.285	1417.84	38.7828	2.73	697823
	High	[R].IVPNQEPEEVEK.[L]	1	1	A0A7E5VCN0	A0A7E5VCN0	Cytosolic non-specific dipeptidase OS=Trichoplusia ni OX=7111 GN=LOC113492664 PE=3 SV=1	2	705.859	1410.71	20.5929	2.81	4.585e+06
High	A0A7E5WVD4	Aminopeptidase W07G4.4 OS=Trichoplusia ni OX=7111 GN=LOC113506144 PE=3 SV=1	FALSE	TRUE	FALSE	5.68627	2	2	2	2.66183e+06	5.68
	Confidence	Annotated Sequence	# Protein Groups	# Proteins	Master Protein Accessions	Protein Accessions	Protein Descriptions	Charge	m/z [Da]	MH+ [Da]	RT [min]	XCorr	Area
	High	[R].NSVGEDAYVADELIR.[S]	1	1	A0A7E5WVD4	A0A7E5WVD4	Aminopeptidase W07G4.4 OS=Trichoplusia ni OX=7111 GN=LOC113506144 PE=3 SV=1	2	825.903	1650.8	35.1372	3.34	1024217
	Medium	[R].ALDAGLDAAPALLR.[C]	1	1	A0A7E5WVD4	A0A7E5WVD4	Aminopeptidase W07G4.4 OS=Trichoplusia ni OX=7111 GN=LOC113506144 PE=3 SV=1	2	683.888	1366.77	36.9916	2.34	4.29944e+06
High	A0A451FUM5	Actin OS=Trichoplusia ni OX=7111 GN=LOC113507353 PE=2 SV=1	TRUE	TRUE	FALSE	9.30851	3	3	3	2.5469e+06	6.18
	Confidence	Annotated Sequence	# Protein Groups	# Proteins	Master Protein Accessions	Protein Accessions	Protein Descriptions	Charge	m/z [Da]	MH+ [Da]	RT [min]	XCorr	Area
	High	[K].SYELPDGQVITIGNER.[F]	1	5	A0A451FUM5	A0A7E5WEX8; A0A451FUM5; P60712; A0A7E5VQ25; G0ZL66	Actin, muscle-type A2 OS=Trichoplusia ni OX=7111 GN=LOC113501708 PE=3 SV=1; Actin OS=Trichoplusia ni OX=7111 GN=LOC113507353 PE=2 SV=1; Actin, cytoplasmic 1 OS=Bos taurus GN=ACTB PE=1 SV=1; Actin, muscle OS=Trichoplusia ni OX=7111 GN=LOC113495705 PE=3 SV=1; Actin OS=Trichoplusia ni OX=7111 GN=LOC113507354 PE=2 SV=1	2	895.95	1790.89	37.2527	2.84	2.43954e+06
	High	[K].DSYVGDEAQSK.[R]	1	5	A0A451FUM5	A0A7E5WEX8; A0A451FUM5; P60712; A0A7E5VQ25; G0ZL66	Actin, muscle-type A2 OS=Trichoplusia ni OX=7111 GN=LOC113501708 PE=3 SV=1; Actin OS=Trichoplusia ni OX=7111 GN=LOC113507353 PE=2 SV=1; Actin, cytoplasmic 1 OS=Bos taurus GN=ACTB PE=1 SV=1; Actin, muscle OS=Trichoplusia ni OX=7111 GN=LOC113495705 PE=3 SV=1; Actin OS=Trichoplusia ni OX=7111 GN=LOC113507354 PE=2 SV=1	2	599.765	1198.52	18.0844	1.71	4.00276e+06
	High	[R].DLTDYLMK.[I]	1	5	A0A451FUM5	A0A7E5WEX8; A0A451FUM5; P60712; A0A7E5VQ25; G0ZL66	Actin, muscle-type A2 OS=Trichoplusia ni OX=7111 GN=LOC113501708 PE=3 SV=1; Actin OS=Trichoplusia ni OX=7111 GN=LOC113507353 PE=2 SV=1; Actin, cytoplasmic 1 OS=Bos taurus GN=ACTB PE=1 SV=1; Actin, muscle OS=Trichoplusia ni OX=7111 GN=LOC113495705 PE=3 SV=1; Actin OS=Trichoplusia ni OX=7111 GN=LOC113507354 PE=2 SV=1	2	499.747	998.486	38.06	1.63	1.19841e+06
High	A0A7E5X1U5	T-complex protein 1 subunit beta OS=Trichoplusia ni OX=7111 GN=LOC113508363 PE=3 SV=1	FALSE	TRUE	FALSE	8.20896	3	3	3	2.49312e+06	8.76
	Confidence	Annotated Sequence	# Protein Groups	# Proteins	Master Protein Accessions	Protein Accessions	Protein Descriptions	Charge	m/z [Da]	MH+ [Da]	RT [min]	XCorr	Area
	High	[R].LPSAVADNAGYDSADLISR.[L]	1	1	A0A7E5X1U5	A0A7E5X1U5	T-complex protein 1 subunit beta OS=Trichoplusia ni OX=7111 GN=LOC113508363 PE=3 SV=1	2	967.975	1934.94	33.4619	3.64	921658
	High	[K].IAELEVAEK.[E]	1	1	A0A7E5X1U5	A0A7E5X1U5	T-complex protein 1 subunit beta OS=Trichoplusia ni OX=7111 GN=LOC113508363 PE=3 SV=1	2	501.279	1001.55	23.3187	2.23	4.45052e+06
	High	[R].NAGQVEVTNDGATILK.[S]	1	1	A0A7E5X1U5	A0A7E5X1U5	T-complex protein 1 subunit beta OS=Trichoplusia ni OX=7111 GN=LOC113508363 PE=3 SV=1	2	815.426	1629.84	27.5049	2.88	2.10719e+06
High	A0A7E5VB81	Programmed cell death protein 4 OS=Trichoplusia ni OX=7111 GN=LOC113492296 PE=3 SV=1	FALSE	TRUE	FALSE	8.03571	3	3	3	2.4813e+06	7.38
	Confidence	Annotated Sequence	# Protein Groups	# Proteins	Master Protein Accessions	Protein Accessions	Protein Descriptions	Charge	m/z [Da]	MH+ [Da]	RT [min]	XCorr	Area
	High	[R].LDNIWGVGGGIRPVK.[S]	1	1	A0A7E5VB81	A0A7E5VB81	Programmed cell death protein 4 OS=Trichoplusia ni OX=7111 GN=LOC113492296 PE=3 SV=1	3	527.635	1580.89	31.7855	2.45
	High	[R].FVQITNEK.[T]	1	1	A0A7E5VB81	A0A7E5VB81	Programmed cell death protein 4 OS=Trichoplusia ni OX=7111 GN=LOC113492296 PE=3 SV=1	2	489.766	978.525	20.2748	1.94	4.27032e+06
	High	[K].EYLTSNDLAEAmR.[C]	1	1	A0A7E5VB81	A0A7E5VB81	Programmed cell death protein 4 OS=Trichoplusia ni OX=7111 GN=LOC113492296 PE=3 SV=1	2	764.85	1528.69	27.6722	2.99	692283
High	A0A7E5VNM7	CREB-regulated transcription coactivator 2-like isoform X1 OS=Trichoplusia ni OX=7111 GN=LOC113495410 PE=3 SV=1	FALSE	TRUE	FALSE	5.24272	2	2	2	2.45202e+06	5.78
	Confidence	Annotated Sequence	# Protein Groups	# Proteins	Master Protein Accessions	Protein Accessions	Protein Descriptions	Charge	m/z [Da]	MH+ [Da]	RT [min]	XCorr	Area
	High	[R].YSPTSPGGSVSPATGGR.[S]	1	4	A0A7E5VNM7	A0A7E5VNM7; A0A7E5VNR8; A0A7E5VNR4; A0A7E5VP40	CREB-regulated transcription coactivator 2-like isoform X1 OS=Trichoplusia ni OX=7111 GN=LOC113495410 PE=3 SV=1; CREB-regulated transcription coactivator 2-like isoform X4 OS=Trichoplusia ni OX=7111 GN=LOC113495410 PE=3 SV=1; CREB-regulated transcription coactivator 2-like isoform X2 OS=Trichoplusia ni OX=7111 GN=LOC113495410 PE=3 SV=1; CREB-regulated transcription coactivator 2-like isoform X3 O…	2	789.382	1577.76	21.357	2.62	2.00588e+06
	High	[K].QAEETAAFEK.[I]	1	6	A0A7E5VNM7	A0A7E5VNM7; A0A7E5VNR8; A0A7E5VNP3; A0A7E5VNR4; A0A7E5VNR5; A0A7E5VP40	CREB-regulated transcription coactivator 2-like isoform X1 OS=Trichoplusia ni OX=7111 GN=LOC113495410 PE=3 SV=1; CREB-regulated transcription coactivator 2-like isoform X4 OS=Trichoplusia ni OX=7111 GN=LOC113495410 PE=3 SV=1; CREB-regulated transcription coactivator 2-like isoform X5 OS=Trichoplusia ni OX=7111 GN=LOC113495410 PE=3 SV=1; CREB-regulated transcription coactivator 2-like isoform X2 O…	2	562.267	1123.53	18.6245	3.17	2.89817e+06
High	A0A2H4WW89	Tubulin alpha chain OS=Trichoplusia ni OX=7111 GN=LOC113497986 PE=2 SV=1	FALSE	TRUE	FALSE	15.3333	5	5	5	2.34699e+06	13.9
	Confidence	Annotated Sequence	# Protein Groups	# Proteins	Master Protein Accessions	Protein Accessions	Protein Descriptions	Charge	m/z [Da]	MH+ [Da]	RT [min]	XCorr	Area
	High	[K].TVGGGDDSFNTFFSETGAGK.[H]	1	2	A0A2H4WW89	A0A7E5WLV3; A0A2H4WW89	Tubulin alpha chain OS=Trichoplusia ni OX=7111 GN=LOC113503819 PE=3 SV=1; Tubulin alpha chain OS=Trichoplusia ni OX=7111 GN=LOC113497986 PE=2 SV=1	2	997.442	1993.88	37.9614	3.21	1.77623e+06
	High	[R].AVFVDLEPTVVDEVR.[T]	1	2	A0A2H4WW89	A0A2H4WW89; A0A7E5WBW2	Tubulin alpha chain OS=Trichoplusia ni OX=7111 GN=LOC113497986 PE=2 SV=1; Tubulin alpha chain OS=Trichoplusia ni OX=7111 GN=LOC113501305 PE=3 SV=1	2	844.45	1687.89	39.7426	2.72	3.24396e+06
	High	[R].TIQFVDWcPTGFK.[V]	1	4	A0A2H4WW89	A0A7E5WLV3; A0A2H4WW89; A0A7E5WZJ5; A0A7E5WBW2	Tubulin alpha chain OS=Trichoplusia ni OX=7111 GN=LOC113503819 PE=3 SV=1; Tubulin alpha chain OS=Trichoplusia ni OX=7111 GN=LOC113497986 PE=2 SV=1; Tubulin alpha-1 chain-like OS=Trichoplusia ni OX=7111 GN=LOC113507200 PE=3 SV=1; Tubulin alpha chain OS=Trichoplusia ni OX=7111 GN=LOC113501305 PE=3 SV=1	2	799.888	1598.77	40.317	2.51	1.25449e+06
	High	[R].NLDIERPTYTNLNR.[L]	1	4	A0A2H4WW89	A0A7E5WLV3; A0A2H4WW89; A0A7E5WZJ5; A0A7E5WBW2	Tubulin alpha chain OS=Trichoplusia ni OX=7111 GN=LOC113503819 PE=3 SV=1; Tubulin alpha chain OS=Trichoplusia ni OX=7111 GN=LOC113497986 PE=2 SV=1; Tubulin alpha-1 chain-like OS=Trichoplusia ni OX=7111 GN=LOC113507200 PE=3 SV=1; Tubulin alpha chain OS=Trichoplusia ni OX=7111 GN=LOC113501305 PE=3 SV=1	2	859.944	1718.88	26.8621	3.52	2.02077e+06
	High	[K].FDLmYAK.[R]	1	4	A0A2H4WW89	A0A7E5WLV3; A0A2H4WW89; A0A7E5WZJ5; A0A7E5WBW2	Tubulin alpha chain OS=Trichoplusia ni OX=7111 GN=LOC113503819 PE=3 SV=1; Tubulin alpha chain OS=Trichoplusia ni OX=7111 GN=LOC113497986 PE=2 SV=1; Tubulin alpha-1 chain-like OS=Trichoplusia ni OX=7111 GN=LOC113507200 PE=3 SV=1; Tubulin alpha chain OS=Trichoplusia ni OX=7111 GN=LOC113501305 PE=3 SV=1	2	452.218	903.428	26.4917	1.94
High	A0A7E5WAQ5	Peptidyl-prolyl cis-trans isomerase OS=Trichoplusia ni OX=7111 GN=LOC113500627 PE=3 SV=1	FALSE	TRUE	FALSE	9.69697	2	2	2	2.14856e+06	1.65
	Confidence	Annotated Sequence	# Protein Groups	# Proteins	Master Protein Accessions	Protein Accessions	Protein Descriptions	Charge	m/z [Da]	MH+ [Da]	RT [min]	XCorr	Area
	High	[K].FADENFVLK.[H]	1	1	A0A7E5WAQ5	A0A7E5WAQ5	Peptidyl-prolyl cis-trans isomerase OS=Trichoplusia ni OX=7111 GN=LOC113500627 PE=3 SV=1	2	541.78	1082.55	30.8953	1.49	2.14856e+06
	High	[K].TSWLDGR.[H]	1	1	A0A7E5WAQ5	A0A7E5WAQ5	Peptidyl-prolyl cis-trans isomerase OS=Trichoplusia ni OX=7111 GN=LOC113500627 PE=3 SV=1	2	417.708	834.41	25.0186	1.65
High	A0A7E5VAA5	Uridine 5'-monophosphate synthase OS=Trichoplusia ni OX=7111 GN=LOC113492106 PE=3 SV=1	FALSE	TRUE	FALSE	6.76533	3	3	3	2.13281e+06	4.14
	Confidence	Annotated Sequence	# Protein Groups	# Proteins	Master Protein Accessions	Protein Accessions	Protein Descriptions	Charge	m/z [Da]	MH+ [Da]	RT [min]	XCorr	Area
	High	[R].FNFLLLEDR.[K]	1	1	A0A7E5VAA5	A0A7E5VAA5	Uridine 5'-monophosphate synthase OS=Trichoplusia ni OX=7111 GN=LOC113492106 PE=3 SV=1	2	583.814	1166.62	41.3011	1.97	1.22022e+06
	High	[K].SPVTQAVLYK.[D]	1	1	A0A7E5VAA5	A0A7E5VAA5	Uridine 5'-monophosphate synthase OS=Trichoplusia ni OX=7111 GN=LOC113492106 PE=3 SV=1	2	553.316	1105.63	24.8874	2.17	2.17904e+06
	Medium	[K].ETQAPVIEKPLNR.[I]	1	1	A0A7E5VAA5	A0A7E5VAA5	Uridine 5'-monophosphate synthase OS=Trichoplusia ni OX=7111 GN=LOC113492106 PE=3 SV=1	3	498.948	1494.83	21.1058	1.83	2.99915e+06
High	A0A7E5VSK5	Heat shock protein 83 OS=Trichoplusia ni OX=7111 GN=LOC113496266 PE=3 SV=1	FALSE	TRUE	FALSE	4.98615	3	3	3	1.85941e+06	4.5
	Confidence	Annotated Sequence	# Protein Groups	# Proteins	Master Protein Accessions	Protein Accessions	Protein Descriptions	Charge	m/z [Da]	MH+ [Da]	RT [min]	XCorr	Area
	High	[R].NADDITQEEYGDFYK.[S]	1	1	A0A7E5VSK5	A0A7E5VSK5	Heat shock protein 83 OS=Trichoplusia ni OX=7111 GN=LOC113496266 PE=3 SV=1	2	904.387	1807.77	32.8737	2.32	708410
	High	[K].YTEDEELNK.[T]	1	1	A0A7E5VSK5	A0A7E5VSK5	Heat shock protein 83 OS=Trichoplusia ni OX=7111 GN=LOC113496266 PE=3 SV=1	2	570.757	1140.51	18.1391	1.41	1.81808e+06
High	A0A7E5X1S9	Dynein light intermediate chain OS=Trichoplusia ni OX=7111 GN=LOC113507896 PE=3 SV=1	FALSE	TRUE	FALSE	3.83795	2	2	2	1.777e+06	4.78
	Confidence	Annotated Sequence	# Protein Groups	# Proteins	Master Protein Accessions	Protein Accessions	Protein Descriptions	Charge	m/z [Da]	MH+ [Da]	RT [min]	XCorr	Area
	High	[R].GEASPAAAAAR.[S]	1	1	A0A7E5X1S9	A0A7E5X1S9	Dynein light intermediate chain OS=Trichoplusia ni OX=7111 GN=LOC113507896 PE=3 SV=1	2	486.248	971.49	14.097	2.91	1.21377e+06
	High	[R].IYGLPFR.[T]	1	1	A0A7E5X1S9	A0A7E5X1S9	Dynein light intermediate chain OS=Trichoplusia ni OX=7111 GN=LOC113507896 PE=3 SV=1	2	433.25	865.493	33.7359	1.87	2.34023e+06
High	A0A7E5WPC2	Annexin OS=Trichoplusia ni OX=7111 GN=LOC113504468 PE=3 SV=1	FALSE	TRUE	FALSE	4.85232	2	2	2	1.56841e+06	6.16
	Confidence	Annotated Sequence	# Protein Groups	# Proteins	Master Protein Accessions	Protein Accessions	Protein Descriptions	Charge	m/z [Da]	MH+ [Da]	RT [min]	XCorr	Area
	High	[R].LGTDESVFNAVLcSR.[S]	1	4	A0A7E5WPC2	A0A7E5WQY4; A0A2H4WWB4; A0A7E5WP76; A0A7E5WPC2	Annexin OS=Trichoplusia ni OX=7111 GN=LOC113504468 PE=3 SV=1; Annexin OS=Trichoplusia ni OX=7111 GN=LOC113504468 PE=2 SV=1; Annexin OS=Trichoplusia ni OX=7111 GN=LOC113504468 PE=3 SV=1; Annexin OS=Trichoplusia ni OX=7111 GN=LOC113504468 PE=3 SV=1	2	834.409	1667.81	38.9444	4.18	886624
	High	[K].SIIHVLSR.[R]	1	4	A0A7E5WPC2	A0A7E5WQY4; A0A2H4WWB4; A0A7E5WP76; A0A7E5WPC2	Annexin OS=Trichoplusia ni OX=7111 GN=LOC113504468 PE=3 SV=1; Annexin OS=Trichoplusia ni OX=7111 GN=LOC113504468 PE=2 SV=1; Annexin OS=Trichoplusia ni OX=7111 GN=LOC113504468 PE=3 SV=1; Annexin OS=Trichoplusia ni OX=7111 GN=LOC113504468 PE=3 SV=1	2	462.785	924.562	21.7009	1.98	2.2502e+06
High	A0A7E5W030	Protein LSM14 homolog A OS=Trichoplusia ni OX=7111 GN=LOC113498215 PE=3 SV=1	FALSE	TRUE	FALSE	5.64972	2	2	2	1.54602e+06	7.74
	Confidence	Annotated Sequence	# Protein Groups	# Proteins	Master Protein Accessions	Protein Accessions	Protein Descriptions	Charge	m/z [Da]	MH+ [Da]	RT [min]	XCorr	Area
	High	[K].DQGSmLDLIGGGSQQSASR.[S]	1	1	A0A7E5W030	A0A7E5W030	Protein LSM14 homolog A OS=Trichoplusia ni OX=7111 GN=LOC113498215 PE=3 SV=1	2	961.95	1922.89	30.3277	3.44	2.67856e+06
	High	[K].SPTADQGTQVGSVASGSSQQR.[D]	1	1	A0A7E5W030	A0A7E5W030	Protein LSM14 homolog A OS=Trichoplusia ni OX=7111 GN=LOC113498215 PE=3 SV=1	2	1024.49	2047.97	20.0833	4.3	413476
High	A0A7E5VMD0	SH3 domain-binding glutamic acid-rich protein homolog OS=Trichoplusia ni OX=7111 GN=LOC113495051 PE=3 SV=1	FALSE	TRUE	FALSE	12.6812	3	3	3	1.50723e+06	7.36
	Confidence	Annotated Sequence	# Protein Groups	# Proteins	Master Protein Accessions	Protein Accessions	Protein Descriptions	Charge	m/z [Da]	MH+ [Da]	RT [min]	XCorr	Area
	High	[K].EAVAEEQTETVELKK.[D]	1	1	A0A7E5VMD0	A0A7E5VMD0	SH3 domain-binding glutamic acid-rich protein homolog OS=Trichoplusia ni OX=7111 GN=LOC113495051 PE=3 SV=1	3	568.628	1703.87	20.8157	3.43	1.85781e+06
	High	[K].SNGGTVSDPNPR.[S]	1	1	A0A7E5VMD0	A0A7E5VMD0	SH3 domain-binding glutamic acid-rich protein homolog OS=Trichoplusia ni OX=7111 GN=LOC113495051 PE=3 SV=1	2	600.783	1200.56	14.2687	1.82	1.69232e+06
	Medium	[R].VLMILDSK.[S]	1	1	A0A7E5VMD0	A0A7E5VMD0	SH3 domain-binding glutamic acid-rich protein homolog OS=Trichoplusia ni OX=7111 GN=LOC113495051 PE=3 SV=1	2	459.77	918.532	30.2277	2.11	971550
High	A0A7E5VLT3	Coiled-coil domain-containing protein 6 isoform X1 OS=Trichoplusia ni OX=7111 GN=LOC113494929 PE=4 SV=1	FALSE	TRUE	FALSE	5.78313	3	3	3	1.22709e+06	6.03
	Confidence	Annotated Sequence	# Protein Groups	# Proteins	Master Protein Accessions	Protein Accessions	Protein Descriptions	Charge	m/z [Da]	MH+ [Da]	RT [min]	XCorr	Area
	High	[K].LEAETLAK.[Q]	1	2	A0A7E5VLT3	A0A7E5VLT3; A0A7E5VLR7	Coiled-coil domain-containing protein 6 isoform X1 OS=Trichoplusia ni OX=7111 GN=LOC113494929 PE=4 SV=1; Coiled-coil domain-containing protein 6 isoform X2 OS=Trichoplusia ni OX=7111 GN=LOC113494929 PE=4 SV=1	2	437.748	874.488	19.154	1.83	1.34494e+06
	High	[K].VELDTYK.[L]	1	2	A0A7E5VLT3	A0A7E5VLT3; A0A7E5VLR7	Coiled-coil domain-containing protein 6 isoform X1 OS=Trichoplusia ni OX=7111 GN=LOC113494929 PE=4 SV=1; Coiled-coil domain-containing protein 6 isoform X2 OS=Trichoplusia ni OX=7111 GN=LOC113494929 PE=4 SV=1	2	434.226	867.445	21.2111	1.81	1.02054e+06
High	A0A7E5WIE9	Translation initiation factor eIF-2B subunit gamma OS=Trichoplusia ni OX=7111 GN=LOC113502516 PE=4 SV=1	FALSE	TRUE	FALSE	6.97168	3	3	3	1.20426e+06	7.37
	Confidence	Annotated Sequence	# Protein Groups	# Proteins	Master Protein Accessions	Protein Accessions	Protein Descriptions	Charge	m/z [Da]	MH+ [Da]	RT [min]	XCorr	Area
	High	[K].WEQLTGLPLTDR.[I]	1	1	A0A7E5WIE9	A0A7E5WIE9	Translation initiation factor eIF-2B subunit gamma OS=Trichoplusia ni OX=7111 GN=LOC113502516 PE=4 SV=1	2	714.878	1428.75	36.4041	3.33	873993
	High	[K].QIDESSTVGEK.[S]	1	1	A0A7E5WIE9	A0A7E5WIE9	Translation initiation factor eIF-2B subunit gamma OS=Trichoplusia ni OX=7111 GN=LOC113502516 PE=4 SV=1	2	596.789	1192.57	16.8116	2.38	1.62567e+06
	High	[K].GIFYNDLLR.[C]	1	1	A0A7E5WIE9	A0A7E5WIE9	Translation initiation factor eIF-2B subunit gamma OS=Trichoplusia ni OX=7111 GN=LOC113502516 PE=4 SV=1	2	555.801	1110.59	36.376	1.66	1.11311e+06
High	A0A7E5VUR1	glutamate dehydrogenase [NAD(P)(+)] OS=Trichoplusia ni OX=7111 GN=LOC113496832 PE=3 SV=1	FALSE	TRUE	FALSE	4.15162	2	2	2	1.17271e+06	4.66
	Confidence	Annotated Sequence	# Protein Groups	# Proteins	Master Protein Accessions	Protein Accessions	Protein Descriptions	Charge	m/z [Da]	MH+ [Da]	RT [min]	XCorr	Area
	High	[K].IIAEAANGPTTPAADK.[I]	1	1	A0A7E5VUR1	A0A7E5VUR1	glutamate dehydrogenase [NAD(P)(+)] OS=Trichoplusia ni OX=7111 GN=LOC113496832 PE=3 SV=1	2	770.405	1539.8	21.8647	2.87	1.62891e+06
	Medium	[R].FTLELAK.[K]	1	1	A0A7E5VUR1	A0A7E5VUR1	glutamate dehydrogenase [NAD(P)(+)] OS=Trichoplusia ni OX=7111 GN=LOC113496832 PE=3 SV=1	2	411.242	821.476	29.33	1.79	716518
High	Q86YZ3	Hornerin OS=Homo sapiens GN=HRNR PE=1 SV=2	TRUE	FALSE	FALSE	4.49123	2	2	2	936284	5.77
	Confidence	Annotated Sequence	# Protein Groups	# Proteins	Master Protein Accessions	Protein Accessions	Protein Descriptions	Charge	m/z [Da]	MH+ [Da]	RT [min]	XCorr	Area
	High	[R].QSLGHGQHGSGSGQSPSPSR.[G]	1	1	Q86YZ3	Q86YZ3	Hornerin OS=Homo sapiens GN=HRNR PE=1 SV=2	3	649.972	1947.9	11.514	3.46	564385
	High	[R].GPYESGSGHSSGLGHR.[E]	1	1	Q86YZ3	Q86YZ3	Hornerin OS=Homo sapiens GN=HRNR PE=1 SV=2	3	528.91	1584.72	12.9881	2.31	1.30818e+06
High	P08779	Keratin, type I cytoskeletal 16 OS=Homo sapiens GN=KRT16 PE=1 SV=4	TRUE	FALSE	FALSE	9.51374	5	5	2	858067	11.94
	Confidence	Annotated Sequence	# Protein Groups	# Proteins	Master Protein Accessions	Protein Accessions	Protein Descriptions	Charge	m/z [Da]	MH+ [Da]	RT [min]	XCorr	Area
	High	[K].EVASNSELVQSSR.[S]	1	1	P08779	P08779	Keratin, type I cytoskeletal 16 OS=Homo sapiens GN=KRT16 PE=1 SV=4	2	703.35	1405.69	20.0009	2.86	857787
	High	[R].DAETWFLSK.[T]	1	1	P08779	P08779	Keratin, type I cytoskeletal 16 OS=Homo sapiens GN=KRT16 PE=1 SV=4	2	548.769	1096.53	37.1755	2.21	858346
	High	[K].VTmQNLNDR.[L]	3	10	P02533; P13645; P08779	Q9Z2K1; P02533; Q7Z3Y7; P13645; Q148H6; Q7Z3Y9; Q7Z3Z0; Q3ZAW8; Q7Z3Y8; P08779	Keratin, type I cytoskeletal 16 OS=Mus musculus GN=Krt16 PE=1 SV=3; Keratin, type I cytoskeletal 14 OS=Homo sapiens GN=KRT14 PE=1 SV=4; Keratin, type I cytoskeletal 28 OS=Homo sapiens GN=KRT28 PE=1 SV=2; Keratin, type I cytoskeletal 10 OS=Homo sapiens GN=KRT10 PE=1 SV=6; Keratin, type I cytoskeletal 28 OS=Bos taurus GN=KRT28 PE=2 SV=1; Keratin, type I cytoskeletal 26 OS=Homo sapiens GN=KRT26 PE=1…	2	553.767	1106.53	14.5476	2.72	3.2039e+07
	High	[KR].LAADDFR.[ATILV]	3	25	P02533; P13645; P08779	Q14532; Q9Z2K1; O76015; O76013; P02533; Q15323; Q7Z3Y7; P08727; Q2M2I5; Q14525; P13645; Q92764; Q6IFX2; Q497I4; O77727; Q148H6; P05784; P19012; P02534; Q3ZAW8; Q04695; P19001; O76014; P08779; Q9QWL7	Keratin, type I cuticular Ha2 OS=Homo sapiens GN=KRT32 PE=1 SV=3; Keratin, type I cytoskeletal 16 OS=Mus musculus GN=Krt16 PE=1 SV=3; Keratin, type I cuticular Ha8 OS=Homo sapiens GN=KRT38 PE=2 SV=3; Keratin, type I cuticular Ha6 OS=Homo sapiens GN=KRT36 PE=1 SV=1; Keratin, type I cytoskeletal 14 OS=Homo sapiens GN=KRT14 PE=1 SV=4; Keratin, type I cuticular Ha1 OS=Homo sapiens GN=KRT31 PE=2 SV=3;…	2	404.204	807.4	22.1774	1.97	1.08382e+08
	High	[R].LASYLDK.[V]	4	11	P02533; P13645; P35527; P08779	P02533; P08727; P13645; P05784; P19012; Q99456; Q04695; P19001; P35527; P08779; Q9QWL7	Keratin, type I cytoskeletal 14 OS=Homo sapiens GN=KRT14 PE=1 SV=4; Keratin, type I cytoskeletal 19 OS=Homo sapiens GN=KRT19 PE=1 SV=4; Keratin, type I cytoskeletal 10 OS=Homo sapiens GN=KRT10 PE=1 SV=6; Keratin, type I cytoskeletal 18 OS=Mus musculus GN=Krt18 PE=1 SV=5; Keratin, type I cytoskeletal 15 OS=Homo sapiens GN=KRT15 PE=1 SV=3; Keratin, type I cytoskeletal 12 OS=Homo sapiens GN=KRT12 PE…	2	405.224	809.44	20.2596	2.18	107661134
High	A0A7E5VP94	Glycosyltransferase family 92 protein OS=Trichoplusia ni OX=7111 GN=LOC113495548 PE=3 SV=1	FALSE	TRUE	FALSE	4.0367	2	3	2	835932	4.32
	Confidence	Annotated Sequence	# Protein Groups	# Proteins	Master Protein Accessions	Protein Accessions	Protein Descriptions	Charge	m/z [Da]	MH+ [Da]	RT [min]	XCorr	Area
	High	[R].QmELIPYNDcLYR.[H]	1	1	A0A7E5VP94	A0A7E5VP94	Glycosyltransferase family 92 protein OS=Trichoplusia ni OX=7111 GN=LOC113495548 PE=3 SV=1	2	865.897	1730.79	34.0042	2.55	327987
	High	[R].IVEWIELVR.[Q]	1	1	A0A7E5VP94	A0A7E5VP94	Glycosyltransferase family 92 protein OS=Trichoplusia ni OX=7111 GN=LOC113495548 PE=3 SV=1	2	578.841	1156.67	40.651	1.77	632166
	Medium	[R].IVEWIELVR.[Q]	1	1	A0A7E5VP94	A0A7E5VP94	Glycosyltransferase family 92 protein OS=Trichoplusia ni OX=7111 GN=LOC113495548 PE=3 SV=1	2	578.84	1156.67	41.1605	1.33	1.34388e+06
High	A0A7E5X604	Probable histone-binding protein Caf1 OS=Trichoplusia ni OX=7111 GN=LOC113509042 PE=4 SV=1	FALSE	TRUE	FALSE	4.86111	2	2	2	751904	5.26
	Confidence	Annotated Sequence	# Protein Groups	# Proteins	Master Protein Accessions	Protein Accessions	Protein Descriptions	Charge	m/z [Da]	MH+ [Da]	RT [min]	XCorr	Area
	High	[K].TPSSDVLVFDYTK.[H]	1	1	A0A7E5X604	A0A7E5X604	Probable histone-binding protein Caf1 OS=Trichoplusia ni OX=7111 GN=LOC113509042 PE=4 SV=1	2	736.371	1471.73	34.9987	3.34	361003
	High	[K].TVALWDLR.[N]	1	1	A0A7E5X604	A0A7E5X604	Probable histone-binding protein Caf1 OS=Trichoplusia ni OX=7111 GN=LOC113509042 PE=4 SV=1	2	487.277	973.547	35.1849	1.92	1.14281e+06
High	A0A7E5WKF0	Casein kinase I isoform X1 OS=Trichoplusia ni OX=7111 GN=LOC113503417 PE=3 SV=1	FALSE	TRUE	FALSE	6.23819	3	3	3	685184	5.16
	Confidence	Annotated Sequence	# Protein Groups	# Proteins	Master Protein Accessions	Protein Accessions	Protein Descriptions	Charge	m/z [Da]	MH+ [Da]	RT [min]	XCorr	Area
	High	[R].LDFFETPDYDQLR.[R]	1	12	A0A7E5WKF0	A0A7E5WK62; A0A7E5WM07; A0A7E5WLF8; A0A7E5WKC8; A0A7E5WLF0; A0A7E5WM12; A0A7E5WKG2; A0A7E5WKF0; A0A7E5WM18; A0A7E5WK67; A0A7E5WLE6; A0A7E5WKF5	Casein kinase I isoform X6 OS=Trichoplusia ni OX=7111 GN=LOC113503417 PE=3 SV=1; Casein kinase I isoform X2 OS=Trichoplusia ni OX=7111 GN=LOC113503417 PE=3 SV=1; Casein kinase I isoform X12 OS=Trichoplusia ni OX=7111 GN=LOC113503417 PE=3 SV=1; Casein kinase I isoform X4 OS=Trichoplusia ni OX=7111 GN=LOC113503417 PE=3 SV=1; Casein kinase I isoform X8 OS=Trichoplusia ni OX=7111 GN=LOC113503417 PE=3…	2	829.89	1658.77	41.1723	3.03	68343.6
	High	[K].EYIDLETNK.[H]	1	12	A0A7E5WKF0	A0A7E5WK62; A0A7E5WM07; A0A7E5WLF8; A0A7E5WKC8; A0A7E5WLF0; A0A7E5WM12; A0A7E5WKG2; A0A7E5WKF0; A0A7E5WM18; A0A7E5WK67; A0A7E5WLE6; A0A7E5WKF5	Casein kinase I isoform X6 OS=Trichoplusia ni OX=7111 GN=LOC113503417 PE=3 SV=1; Casein kinase I isoform X2 OS=Trichoplusia ni OX=7111 GN=LOC113503417 PE=3 SV=1; Casein kinase I isoform X12 OS=Trichoplusia ni OX=7111 GN=LOC113503417 PE=3 SV=1; Casein kinase I isoform X4 OS=Trichoplusia ni OX=7111 GN=LOC113503417 PE=3 SV=1; Casein kinase I isoform X8 OS=Trichoplusia ni OX=7111 GN=LOC113503417 PE=3…	2	562.777	1124.55	25.9491	2.13	1.28935e+06
High	A0A7E5X5Y1	Tubulin beta chain OS=Trichoplusia ni OX=7111 GN=LOC113508948 PE=3 SV=1	FALSE	TRUE	FALSE	8.64745	3	4	1	598883	9.52
	Confidence	Annotated Sequence	# Protein Groups	# Proteins	Master Protein Accessions	Protein Accessions	Protein Descriptions	Charge	m/z [Da]	MH+ [Da]	RT [min]	XCorr	Area
	High	[R].FPGQLNADLR.[K]	2	11	A0A7E5X5Y1; A0A7E5VK44	A0A7E5VDZ1; A0A7E5X5Y1; A0A7E5VK44; A0A7E5V8B9; A0A7E5VE36; A0A7E5VJT1; A0A7E5VE58; E1BJK2; A0A7E5VJS6; A0A7E5X115; A0A7E5VJV7	Tubulin beta chain OS=Trichoplusia ni OX=7111 GN=LOC113492970 PE=3 SV=1; Tubulin beta chain OS=Trichoplusia ni OX=7111 GN=LOC113508948 PE=3 SV=1; Tubulin beta chain OS=Trichoplusia ni OX=7111 GN=LOC113494443 PE=3 SV=1; Tubulin beta chain OS=Trichoplusia ni OX=7111 GN=LOC113491657 PE=3 SV=1; Tubulin beta chain OS=Trichoplusia ni OX=7111 GN=LOC113492972 PE=3 SV=1; Tubulin beta chain OS=Trichoplusia…	2	565.801	1130.6	28.4777	2.11	1.95739e+06
	High	[K].MSATFIGNSTAIQEIFK.[R]	1	1	A0A7E5X5Y1	A0A7E5X5Y1	Tubulin beta chain OS=Trichoplusia ni OX=7111 GN=LOC113508948 PE=3 SV=1	2	929.475	1857.94	42.2425	2.09	598883
	High	[R].INVYYNEASGGK.[Y]	2	5	A0A7E5X5Y1; A0A7E5VK44	A0A7E5X5Y1; A0A7E5VK44; A0A7E5VE36; A0A7E5VE58; A0A7E5VJV7	Tubulin beta chain OS=Trichoplusia ni OX=7111 GN=LOC113508948 PE=3 SV=1; Tubulin beta chain OS=Trichoplusia ni OX=7111 GN=LOC113494443 PE=3 SV=1; Tubulin beta chain OS=Trichoplusia ni OX=7111 GN=LOC113492972 PE=3 SV=1; Tubulin beta chain OS=Trichoplusia ni OX=7111 GN=LOC113492971 PE=3 SV=1; Tubulin beta chain OS=Trichoplusia ni OX=7111 GN=LOC113494444 PE=3 SV=1	2	657.82	1314.63	23.3697	3.09	18519585
	High	[R].FPGQLNADLR.[K]	2	11	A0A7E5X5Y1; A0A7E5VK44	A0A7E5VDZ1; A0A7E5X5Y1; A0A7E5VK44; A0A7E5V8B9; A0A7E5VE36; A0A7E5VJT1; A0A7E5VE58; E1BJK2; A0A7E5VJS6; A0A7E5X115; A0A7E5VJV7	Tubulin beta chain OS=Trichoplusia ni OX=7111 GN=LOC113492970 PE=3 SV=1; Tubulin beta chain OS=Trichoplusia ni OX=7111 GN=LOC113508948 PE=3 SV=1; Tubulin beta chain OS=Trichoplusia ni OX=7111 GN=LOC113494443 PE=3 SV=1; Tubulin beta chain OS=Trichoplusia ni OX=7111 GN=LOC113491657 PE=3 SV=1; Tubulin beta chain OS=Trichoplusia ni OX=7111 GN=LOC113492972 PE=3 SV=1; Tubulin beta chain OS=Trichoplusia…	2	565.802	1130.6	29.2637	2.24	395713
High	P04259	Keratin, type II cytoskeletal 6B OS=Homo sapiens GN=KRT6B PE=1 SV=5	TRUE	FALSE	FALSE	10.1064	7	9	1	488298	20.41
	Confidence	Annotated Sequence	# Protein Groups	# Proteins	Master Protein Accessions	Protein Accessions	Protein Descriptions	Charge	m/z [Da]	MH+ [Da]	RT [min]	XCorr	Area
	High	[R].NLDLDSIIAEVK.[A]	3	8	P35908; P04259; P13647	Q5XKE5; P35908; P04259; P02538; O95678; Q8VED5; P48668; P13647	Keratin, type II cytoskeletal 79 OS=Homo sapiens GN=KRT79 PE=1 SV=2; Keratin, type II cytoskeletal 2 epidermal OS=Homo sapiens GN=KRT2 PE=1 SV=2; Keratin, type II cytoskeletal 6B OS=Homo sapiens GN=KRT6B PE=1 SV=5; Keratin, type II cytoskeletal 6A OS=Homo sapiens GN=KRT6A PE=1 SV=3; Keratin, type II cytoskeletal 75 OS=Homo sapiens GN=KRT75 PE=1 SV=2; Keratin, type II cytoskeletal 79 OS=Mus muscul…	2	665.367	1329.73	43.6741	2.17	3.34801e+06
	High	[K].YEELQITAGR.[H]	2	2	P04264; P04259	P04264; P04259	Keratin, type II cytoskeletal 1 OS=Homo sapiens GN=KRT1 PE=1 SV=6; Keratin, type II cytoskeletal 6B OS=Homo sapiens GN=KRT6B PE=1 SV=5	2	590.305	1179.6	26.359	2.5	6.03377e+07
	High	[KR].NKYEDEINKR.[T]	3	11	P04264; P04259; P13647	H-INV:HIT000016045; P04264; P04259; P02538; Q8VED5; Q5XQN5; P48668; Q6IFZ6; P05787; Q922U2; P13647	Tax_Id=9606 Gene_Symbol=- Similar to Keratin, type II cytoskeletal 8 [OS=Homo sapiens]; Keratin, type II cytoskeletal 1 OS=Homo sapiens GN=KRT1 PE=1 SV=6; Keratin, type II cytoskeletal 6B OS=Homo sapiens GN=KRT6B PE=1 SV=5; Keratin, type II cytoskeletal 6A OS=Homo sapiens GN=KRT6A PE=1 SV=3; Keratin, type II cytoskeletal 79 OS=Mus musculus GN=Krt79 PE=2 SV=2; Keratin, type II cytoskeletal 5 OS=Bo…	3	436.89	1308.65	15.3142	2.94	89241568
	High	[KR].NKYEDEINKR.[T]	3	11	P04264; P04259; P13647	H-INV:HIT000016045; P04264; P04259; P02538; Q8VED5; Q5XQN5; P48668; Q6IFZ6; P05787; Q922U2; P13647	Tax_Id=9606 Gene_Symbol=- Similar to Keratin, type II cytoskeletal 8 [OS=Homo sapiens]; Keratin, type II cytoskeletal 1 OS=Homo sapiens GN=KRT1 PE=1 SV=6; Keratin, type II cytoskeletal 6B OS=Homo sapiens GN=KRT6B PE=1 SV=5; Keratin, type II cytoskeletal 6A OS=Homo sapiens GN=KRT6A PE=1 SV=3; Keratin, type II cytoskeletal 79 OS=Mus musculus GN=Krt79 PE=2 SV=2; Keratin, type II cytoskeletal 5 OS=Bo…	2	654.831	1308.65	15.3276	2.81	5.99091e+06
	High	[KR].AQYEEIAQR.[S]	2	7	P35908; P04259	P35908; P04259; P02538; Q01546; P48668; P19013; E1B991	Keratin, type II cytoskeletal 2 epidermal OS=Homo sapiens GN=KRT2 PE=1 SV=2; Keratin, type II cytoskeletal 6B OS=Homo sapiens GN=KRT6B PE=1 SV=5; Keratin, type II cytoskeletal 6A OS=Homo sapiens GN=KRT6A PE=1 SV=3; Keratin, type II cytoskeletal 2 oral OS=Homo sapiens GN=KRT76 PE=1 SV=2; Keratin, type II cytoskeletal 6C OS=Homo sapiens GN=KRT6C PE=1 SV=3; Keratin, type II cytoskeletal 4 OS=Homo sa…	2	554.275	1107.54	19.9926	1.88	2.83953e+07
	High	[KR].NKYEDEINKR.[T]	3	11	P04264; P04259; P13647	H-INV:HIT000016045; P04264; P04259; P02538; Q8VED5; Q5XQN5; P48668; Q6IFZ6; P05787; Q922U2; P13647	Tax_Id=9606 Gene_Symbol=- Similar to Keratin, type II cytoskeletal 8 [OS=Homo sapiens]; Keratin, type II cytoskeletal 1 OS=Homo sapiens GN=KRT1 PE=1 SV=6; Keratin, type II cytoskeletal 6B OS=Homo sapiens GN=KRT6B PE=1 SV=5; Keratin, type II cytoskeletal 6A OS=Homo sapiens GN=KRT6A PE=1 SV=3; Keratin, type II cytoskeletal 79 OS=Mus musculus GN=Krt79 PE=2 SV=2; Keratin, type II cytoskeletal 5 OS=Bo…	3	436.889	1308.65	15.8629	2.24
	High	[K].FASFIDK.[V]	3	28	P35908; P04259; P13647	Q5XKE5; P08729; Q7Z794; Q7RTS7; Q3TTY5; P35908; Q9R0H5; Q6NXH9; P04259; P02538; Q01546; O95678; P50446; Q6IME9; Q8BGZ7; Q8VED5; Q5XQN5; P48668; P07744; Q9NSB2; P12035; Q6IFZ6; Q9DCV7; Q3SY84; P19013; P05787; Q922U2; P13647	Keratin, type II cytoskeletal 79 OS=Homo sapiens GN=KRT79 PE=1 SV=2; Keratin, type II cytoskeletal 7 OS=Homo sapiens GN=KRT7 PE=1 SV=5; Keratin, type II cytoskeletal 1b OS=Homo sapiens GN=KRT77 PE=2 SV=3; Keratin, type II cytoskeletal 74 OS=Homo sapiens GN=KRT74 PE=1 SV=2; Keratin, type II cytoskeletal 2 epidermal OS=Mus musculus GN=Krt2 PE=1 SV=1; Keratin, type II cytoskeletal 2 epidermal OS=Hom…	2	414.219	827.43	26.2003	2.03
	High	[KR].NKYEDEINK.[HR]	3	13	P04264; P04259; P13647	Q5XKE5; H-INV:HIT000016045; P04264; P04259; P02538; Q8VED5; Q5XQN5; P48668; Q6IFZ6; H-INV:HIT000292931; P05787; Q922U2; P13647	Keratin, type II cytoskeletal 79 OS=Homo sapiens GN=KRT79 PE=1 SV=2; Tax_Id=9606 Gene_Symbol=- Similar to Keratin, type II cytoskeletal 8 [OS=Homo sapiens]; Keratin, type II cytoskeletal 1 OS=Homo sapiens GN=KRT1 PE=1 SV=6; Keratin, type II cytoskeletal 6B OS=Homo sapiens GN=KRT6B PE=1 SV=5; Keratin, type II cytoskeletal 6A OS=Homo sapiens GN=KRT6A PE=1 SV=3; Keratin, type II cytoskeletal 79 OS=M…	2	576.779	1152.55	15.869	2.07	1.02627e+06
	High	[R].SLYGLGGSK.[R]	1	3	P04259	P04259; P02538; P48668	Keratin, type II cytoskeletal 6B OS=Homo sapiens GN=KRT6B PE=1 SV=5; Keratin, type II cytoskeletal 6A OS=Homo sapiens GN=KRT6A PE=1 SV=3; Keratin, type II cytoskeletal 6C OS=Homo sapiens GN=KRT6C PE=1 SV=3	2	441.24	881.472	23.4601	1.77	488298
High	A0A7E5W2I6	Importin subunit alpha OS=Trichoplusia ni OX=7111 GN=LOC113498599 PE=3 SV=1	FALSE	TRUE	FALSE	8.31721	3	3	1	126622	6.52
	Confidence	Annotated Sequence	# Protein Groups	# Proteins	Master Protein Accessions	Protein Accessions	Protein Descriptions	Charge	m/z [Da]	MH+ [Da]	RT [min]	XCorr	Area
	High	[R].ALGNmLTGSDEQTDR.[C]	2	2	A0A7E5W2I6; A0A7E5W1T4	A0A7E5W2I6; A0A7E5W1T4	Importin subunit alpha OS=Trichoplusia ni OX=7111 GN=LOC113498599 PE=3 SV=1; Importin subunit alpha OS=Trichoplusia ni OX=7111 GN=LOC113498599 PE=3 SV=1	2	812.367	1623.73	22.0651	2.44	1.39878e+06
	High	[K].VLTPEEIVQVLR.[T]	1	1	A0A7E5W2I6	A0A7E5W2I6	Importin subunit alpha OS=Trichoplusia ni OX=7111 GN=LOC113498599 PE=3 SV=1	2	698.414	1395.82	43.0321	2.02	126622
	Medium	[R].ALSPEAGEEIIDHTEK.[V]	2	2	A0A7E5W2I6; A0A7E5W1T4	A0A7E5W2I6; A0A7E5W1T4	Importin subunit alpha OS=Trichoplusia ni OX=7111 GN=LOC113498599 PE=3 SV=1; Importin subunit alpha OS=Trichoplusia ni OX=7111 GN=LOC113498599 PE=3 SV=1	3	580.289	1738.85	28.2019	2.06	8.35893e+06
