# Supplementary material for: Purified zymogens reveal mechanisms of snake venom metalloproteinase auto-activation
Source: eLife. 2026 Jun 10;15:RP109112. doi: 10.7554/eLife.109112 (PMC13252954; doi:10.7554/eLife.109112)
Supplement: Figure 3—figure supplement 2—source data 3. [file elife-109112-fig3-figsupp2-data3.xlsx]

## Sheet: S5a
Volume (mL)	Abs 280 nm (mAU)	Volume (mL)	%B
0	-3.37859	0	0
0.004158	-3.404	0.041584	0
0.008316	-3.40644	0.083167	0
0.012474	-3.40787	0.124751	0
0.016632	-3.41078	0.166334	0
0.020789	-3.41345	0.207918	0
0.024947	-3.41496	0.249502	0
0.029105	-3.41475	0.291085	0
0.033263	-3.4127	0.332669	0
0.037421	-3.41081	0.374253	0
0.041579	-3.41014	0.415836	0
0.045737	-3.40912	0.45742	0
0.049895	-3.40754	0.499003	0
0.054052	-3.4072	0.540587	0
0.05821	-3.40925	0.582171	0
0.062368	-3.41107	0.623754	0
0.066526	-3.41254	0.665338	0
0.070684	-3.41362	0.706922	0
0.074842	-3.41439	0.748505	0
0.079	-3.4153	0.790089	0
0.083158	-3.4153	0.831672	0
0.087316	-3.41615	0.873256	0
0.091473	-3.41675	0.91484	0
0.095631	-3.41397	0.956423	0
0.099789	-3.40815	0.998007	0
0.103947	-3.39765	1.03959	0
0.108105	-3.37779	1.08117	0
0.112263	-3.34866	1.12276	0
0.116421	-3.30623	1.16434	0
0.120579	-3.24001	1.20592	0
0.124736	-3.13995	1.24751	0
0.128894	-3.00598	1.28909	0
0.133052	-2.84395	1.33068	0
0.13721	-2.65327	1.37226	0
0.141368	-2.42696	1.41384	0
0.145526	-2.15796	1.45543	0
0.149684	-1.84736	1.49701	0
0.153842	-1.49723	1.53859	0
0.157999	-1.10435	1.58018	0
0.162157	-0.66471	1.62176	0
0.166315	-0.18139	1.66335	0
0.170473	0.343173	1.70493	0
0.174631	0.906943	1.74651	0
0.178789	1.50491	1.7881	0
0.182947	2.13376	1.82968	0
0.187105	2.78549	1.87126	0
0.191263	3.46378	1.91285	0
0.19542	4.17376	1.95443	0
0.199578	4.9031	1.99601	0
0.203736	5.65106	2.0376	0
0.207894	6.41715	2.07918	0
0.212052	7.19782	2.12077	0
0.21621	7.99216	2.16235	0
0.220368	8.7948	2.20393	0
0.224526	9.59222	2.24552	0
0.228683	10.3683	2.2871	0
0.232841	11.1209	2.32868	0
0.236999	11.8547	2.37027	0
0.241157	12.5653	2.41185	0
0.245315	13.2536	2.45343	0
0.249473	13.9182	2.49502	0
0.253631	14.5518	2.5366	0
0.257789	15.1555	2.57818	0
0.261947	15.7276	2.61977	0
0.266104	16.2622	2.66135	0
0.270262	16.7569	2.70294	0
0.27442	17.2146	2.74452	0
0.278578	17.6373	2.7861	0
0.282736	18.033	2.82769	0
0.286894	18.4057	2.86927	0
0.291052	18.7557	2.91085	0
0.29521	19.0834	2.95244	0
0.299367	19.3906	2.99402	0
0.303525	19.6829	3.0356	0
0.307683	19.9541	3.07719	0
0.311841	20.2037	3.11877	0
0.315999	20.4375	3.16036	0
0.320157	20.6481	3.20194	0
0.324315	20.8414	3.24352	0
0.328473	21.0271	3.28511	0
0.332631	21.2071	3.32669	0
0.336788	21.3792	3.36827	0
0.340946	21.5439	3.40986	0
0.345104	21.6953	3.45144	0
0.349262	21.8318	3.49302	0
0.35342	21.9634	3.53461	0
0.357578	22.0913	3.57619	0
0.361736	22.2119	3.61777	0
0.365894	22.3294	3.65936	0
0.370051	22.4432	3.70094	0
0.374209	22.5572	3.74253	0
0.378367	22.6671	3.78411	0
0.382525	22.7728	3.82569	0
0.386683	22.869	3.86728	0
0.390841	22.9579	3.90886	0
0.394999	23.0457	3.95044	0
0.399157	23.1295	3.99203	0
0.403314	23.21	4.03361	0
0.407472	23.2856	4.07519	0
0.41163	23.362	4.11678	0
0.415788	23.4433	4.15836	0
0.419946	23.5197	4.19995	0
0.424104	23.5962	4.24153	0
0.428262	23.6743	4.28311	0
0.43242	23.7434	4.3247	0
0.436578	23.8086	4.36628	0
0.440735	23.8727	4.40786	0
0.444893	23.9347	4.44945	0
0.449051	23.9985	4.49103	0
0.453209	24.064	4.53261	0
0.457367	24.122	4.5742	0
0.461525	24.1764	4.61578	0
0.465683	24.2304	4.65737	0
0.469841	24.2812	4.69895	0
0.473998	24.3316	4.74053	0
0.478156	24.3767	4.78212	0
0.482314	24.4211	4.8237	0
0.486472	24.4681	4.86528	0
0.49063	24.5175	4.90687	0
0.494788	24.568	4.94845	0
0.498946	24.6178	4.99003	0
0.503104	24.6664	5.03162	0
0.507262	24.7126	5.0732	0
0.511419	24.7608	5.11479	0
0.515577	24.8099	5.15637	0.098648
0.519735	24.8566	5.19795	0.1
0.523893	24.904	5.23954	0.1
0.528051	24.9547	5.28112	0.1
0.532209	25.0049	5.3227	0.1
0.536367	25.0568	5.36429	0.1
0.540525	25.11	5.40587	0.1
0.544682	25.164	5.44745	0.1
0.54884	25.2195	5.48904	0.1
0.552998	25.2787	5.53062	0.1
0.557156	25.3416	5.57221	0.1
0.561314	25.4084	5.61379	0.1
0.565472	25.4762	5.65537	0.1
0.56963	25.5482	5.69696	0.1
0.573788	25.6223	5.73854	0.1
0.577945	25.6965	5.78012	0.1
0.582103	25.7783	5.82171	0.1
0.586261	25.8659	5.86329	0.1
0.590419	25.9566	5.90487	0.1
0.594577	26.0528	5.94646	0.1
0.598735	26.1528	5.98804	0.1
0.602893	26.2569	6.02963	0.1
0.607051	26.3645	6.07121	0.1
0.611209	26.4776	6.11279	0.1
0.615366	26.5944	6.15438	0.1
0.619524	26.7159	6.19596	0.1
0.623682	26.8514	6.23754	0.1
0.62784	26.9907	6.27913	0.1
0.631998	27.128	6.32071	0.1
0.636156	27.2631	6.36229	0.1
0.640314	27.4025	6.40388	0.1
0.644472	27.5451	6.44546	0.1
0.648629	27.6954	6.48705	0.1
0.652787	27.8506	6.52863	0.1
0.656945	28.0088	6.57021	0.1
0.661103	28.1701	6.6118	0.1
0.665261	28.3384	6.65338	0.1
0.669419	28.5054	6.69496	0.1
0.673577	28.6737	6.73655	0.1
0.677735	28.8453	6.77813	0.1
0.681893	29.018	6.81971	0.1
0.68605	29.191	6.8613	0.1
0.690208	29.3658	6.90288	0.1
0.694366	29.5391	6.94447	0.1
0.698524	29.7098	6.98605	0.1
0.702682	29.8778	7.02763	0.1
0.70684	30.0454	7.06922	0.1
0.710998	30.2135	7.1108	0.1
0.715156	30.3817	7.15238	0.1
0.719313	30.5459	7.19397	0.1
0.723471	30.7059	7.23555	0.1
0.727629	30.8553	7.27713	0.1
0.731787	31.0047	7.31872	0.1
0.735945	31.1566	7.3603	0.1
0.740103	31.3109	7.40189	0.1
0.744261	31.4651	7.44347	0.1
0.748419	31.6166	7.48505	0.1
0.752577	31.763	7.52664	0.1
0.756734	31.9051	7.56822	0.1
0.760892	32.0457	7.6098	0.1
0.76505	32.1831	7.65139	0.1
0.769208	32.3133	7.69297	0.1
0.773366	32.4435	7.73455	0.1
0.777524	32.5694	7.77614	0.1
0.781682	32.6921	7.81772	0.1
0.78584	32.816	7.8593	0.1
0.789997	32.9371	7.90089	0.1
0.794155	33.0559	7.94247	0.1
0.798313	33.1754	7.98406	0.1
0.802471	33.2954	8.02564	0.1
0.806629	33.4177	8.06722	0.1
0.810787	33.5346	8.10881	0.1
0.814945	33.651	8.15039	0.1
0.819103	33.7657	8.19197	0.1
0.82326	33.8811	8.23356	0.1
0.827418	33.9971	8.27514	0.1
0.831576	34.1146	8.31672	0.1
0.835734	34.231	8.35831	0.1
0.839892	34.349	8.39989	0.1
0.84405	34.4732	8.44148	0.1
0.848208	34.5936	8.48306	0.1
0.852366	34.7116	8.52464	0.1
0.856524	34.8314	8.56623	0.1
0.860681	34.9537	8.60781	0.1
0.864839	35.0759	8.64939	0.1
0.868997	35.2008	8.69098	0.1
0.873155	35.3269	8.73256	0.1
0.877313	35.4563	8.77414	0.1
0.881471	35.584	8.81573	0.1
0.885629	35.7113	8.85731	0.1
0.889787	35.8405	8.89889	0.1
0.893944	35.9703	8.94048	0.1
0.898102	36.1028	8.98206	0.1
0.90226	36.2359	9.02365	0.1
0.906418	36.3713	9.06523	0.1
0.910576	36.5062	9.10681	0.1
0.914734	36.6445	9.1484	0.1
0.918892	36.7786	9.18998	0.1
0.92305	36.9117	9.23156	0.1
0.927208	37.0495	9.27315	0.1
0.931365	37.1841	9.31473	0.1
0.935523	37.3166	9.35632	0.1
0.939681	37.4509	9.3979	0.1
0.943839	37.5853	9.43948	0.1
0.947997	37.7128	9.48107	0.1
0.952155	37.8393	9.52265	0.1
0.956313	37.9694	9.56423	0.1
0.960471	38.095	9.60582	0.1
0.964628	38.2209	9.6474	0.1
0.968786	38.3468	9.68898	0.1
0.972944	38.4721	9.73057	0.1
0.977102	38.5947	9.77215	0.1
0.98126	38.7159	9.81373	0.1
0.985418	38.8339	9.85532	0.1
0.989576	38.9494	9.8969	0.1
0.993734	39.0626	9.93849	0.1
0.997891	39.1765	9.98007	0.1
1.00205	39.2818	10.0216	0.1
1.00621	39.3858	10.0632	0.1
1.01036	39.4893	10.1048	0.1
1.01452	39.5909	10.1464	0.1
1.01868	39.6922	10.188	0.1
1.02284	39.7917	10.2296	0.1
1.027	39.8882	10.2712	0.1
1.03116	39.9789	10.3127	0.1
1.03531	40.0691	10.3543	0.1
1.03947	40.1598	10.3959	0.1
1.04363	40.247	10.4375	0.1
1.04779	40.3349	10.4791	0.1
1.05194	40.4218	10.5207	0.1
1.0561	40.5112	10.5622	0.1
1.06026	40.5966	10.6038	0.1
1.06442	40.6828	10.6454	0.1
1.06858	40.7618	10.687	0.1
1.07273	40.8369	10.7286	0.1
1.07689	40.9087	10.7702	0.1
1.08105	40.9819	10.8117	0.1
1.08521	41.0561	10.8533	0.1
1.08936	41.1314	10.8949	0.1
1.09352	41.2035	10.9365	0.1
1.09768	41.2725	10.9781	0.1
1.10184	41.3395	11.0197	0.1
1.106	41.4078	11.0612	0.1
1.11015	41.4731	11.1028	0.1
1.11431	41.5348	11.1444	0.1
1.11847	41.5965	11.186	0.1
1.12263	41.6554	11.2276	0.1
1.12679	41.7153	11.2692	0.1
1.13094	41.7737	11.3108	0.1
1.1351	41.829	11.3523	0.1
1.13926	41.8834	11.3939	0.1
1.14342	41.9344	11.4355	0.1
1.14758	41.9826	11.4771	0.1
1.15173	42.027	11.5187	0.1
1.15589	42.0707	11.5602	0.1
1.16005	42.1112	11.6018	0.1
1.16421	42.1493	11.6434	0.1
1.16837	42.1834	11.685	0.1
1.17252	42.2188	11.7266	0.1
1.17668	42.2513	11.7682	0.1
1.18084	42.2805	11.8097	0.1
1.185	42.3071	11.8513	0.1
1.18915	42.3283	11.8929	0.1
1.19331	42.349	11.9345	0.1
1.19747	42.3695	11.9761	0.1
1.20163	42.3876	12.0177	0.1
1.20579	42.4023	12.0593	0.1
1.20994	42.4155	12.1008	0.1
1.2141	42.4269	12.1424	0.1
1.21826	42.4352	12.184	0.1
1.22242	42.4408	12.2256	0.1
1.22657	42.4442	12.2672	0.1
1.23073	42.4459	12.3087	0.1
1.23489	42.4464	12.3503	0.1
1.23905	42.447	12.3919	0.1
1.24321	42.4418	12.4335	0.1
1.24736	42.4385	12.4751	0.1
1.25152	42.4295	12.5167	0.1
1.25568	42.4179	12.5582	0.1
1.25984	42.4042	12.5998	0.1
1.264	42.3887	12.6414	0.1
1.26815	42.3734	12.683	0.1
1.27231	42.3588	12.7246	0.1
1.27647	42.3403	12.7662	0.1
1.28063	42.3199	12.8078	0.1
1.28479	42.2958	12.8493	0.1
1.28894	42.2718	12.8909	0.1
1.2931	42.2447	12.9325	0.1
1.29726	42.2154	12.9741	0.1
1.30142	42.1856	13.0157	0.1
1.30557	42.157	13.0573	0.1
1.30973	42.1249	13.0988	0.1
1.31389	42.0952	13.1404	0.1
1.31805	42.0604	13.182	0.1
1.32221	42.0249	13.2236	0.1
1.32636	41.9836	13.2652	0.1
1.33052	41.9442	13.3068	0.1
1.33468	41.9045	13.3483	0.1
1.33884	41.8658	13.3899	0.1
1.343	41.8231	13.4315	0.1
1.34715	41.7798	13.4731	0.1
1.35131	41.7315	13.5147	0.1
1.35547	41.689	13.5563	0.1
1.35963	41.6416	13.5978	0.1
1.36379	41.5949	13.6394	0.1
1.36794	41.5492	13.681	0.1
1.3721	41.4999	13.7226	0.1
1.37626	41.4512	13.7642	0.1
1.38042	41.4049	13.8058	0.1
1.38457	41.3561	13.8474	0.1
1.38873	41.3072	13.8889	0.1
1.39289	41.2565	13.9305	0.1
1.39705	41.2051	13.9721	0.1
1.40121	41.1525	14.0137	0.1
1.40536	41.1003	14.0553	0.1
1.40952	41.0459	14.0968	0.1
1.41368	40.9968	14.1384	0.1
1.41784	40.9449	14.18	0.1
1.42199	40.8963	14.2216	0.1
1.42615	40.8451	14.2632	0.1
1.43031	40.7957	14.3048	0.1
1.43447	40.7426	14.3463	0.1
1.43863	40.6889	14.3879	0.1
1.44278	40.6373	14.4295	0.1
1.44694	40.5861	14.4711	0.1
1.4511	40.5372	14.5127	0.1
1.45526	40.4867	14.5543	0.1
1.45942	40.4337	14.5959	0.1
1.46357	40.3855	14.6374	0.1
1.46773	40.3374	14.679	0.1
1.47189	40.287	14.7206	0.1
1.47605	40.2387	14.7622	0.1
1.48021	40.1891	14.8038	0.1
1.48436	40.1353	14.8453	0.1
1.48852	40.0853	14.8869	0.1
1.49268	40.0344	14.9285	0.1
1.49684	39.9847	14.9701	0.1
1.501	39.9352	15.0117	0.1
1.50515	39.8832	15.0533	0.1
1.50931	39.8351	15.0949	0.1
1.51347	39.7869	15.1364	0.1
1.51763	39.737	15.178	0.1
1.52178	39.6864	15.2196	0.1
1.52594	39.6366	15.2612	0.1
1.5301	39.5889	15.3028	0.1
1.53426	39.5416	15.3444	0.1
1.53842	39.4907	15.3859	0.1
1.54257	39.441	15.4275	0.1
1.54673	39.3904	15.4691	0.1
1.55089	39.3447	15.5107	0.1
1.55505	39.2977	15.5523	0.1
1.5592	39.2522	15.5939	0.1
1.56336	39.2045	15.6354	0.1
1.56752	39.1564	15.677	0.1
1.57168	39.1064	15.7186	0.1
1.57584	39.0588	15.7602	0.1
1.58	39.013	15.8018	0.1
1.58415	38.9642	15.8434	0.1
1.58831	38.92	15.8849	0.1
1.59247	38.876	15.9265	0.1
1.59663	38.834	15.9681	0.1
1.60078	38.7885	16.0097	0.1
1.60494	38.7427	16.0513	0.1
1.6091	38.7022	16.0929	0.1
1.61326	38.6603	16.1345	0.1
1.61742	38.6184	16.176	0.1
1.62157	38.5749	16.2176	0.1
1.62573	38.5327	16.2592	0.1
1.62989	38.4916	16.3008	0.1
1.63405	38.4511	16.3424	0.1
1.6382	38.4093	16.3839	0.1
1.64236	38.3704	16.4255	0.1
1.64652	38.3328	16.4671	0.1
1.65068	38.2961	16.5087	0.1
1.65484	38.2555	16.5503	0.1
1.65899	38.2147	16.5919	0.1
1.66315	38.1752	16.6334	0.1
1.66731	38.1372	16.675	0.1
1.67147	38.0987	16.7166	0.1
1.67563	38.0606	16.7582	0.1
1.67978	38.025	16.7998	0.1
1.68394	37.9878	16.8414	0.1
1.6881	37.9518	16.883	0.1
1.69226	37.9151	16.9245	0.1
1.69642	37.8768	16.9661	0.1
1.70057	37.8378	17.0077	0.1
1.70473	37.8026	17.0493	0.1
1.70889	37.7694	17.0909	0.1
1.71305	37.734	17.1324	0.1
1.71721	37.6951	17.174	0.1
1.72136	37.6571	17.2156	0.1
1.72552	37.6202	17.2572	0.1
1.72968	37.5838	17.2988	0.1
1.73384	37.5475	17.3404	0.1
1.73799	37.5132	17.3819	0.1
1.74215	37.4792	17.4235	0.1
1.74631	37.4455	17.4651	0.1
1.75047	37.4086	17.5067	0.1
1.75463	37.3715	17.5483	0.1
1.75878	37.3358	17.5899	0.1
1.76294	37.3024	17.6315	0.1
1.7671	37.2692	17.673	0.1
1.77126	37.2338	17.7146	0.1
1.77541	37.1985	17.7562	0.1
1.77957	37.1656	17.7978	0.1
1.78373	37.1295	17.8394	0.1
1.78789	37.0937	17.881	0.1
1.79205	37.0605	17.9225	0.1
1.79621	37.0272	17.9641	0.1
1.80036	36.9928	18.0057	0.1
1.80452	36.9602	18.0473	0.1
1.80868	36.929	18.0889	0.1
1.81284	36.8952	18.1305	0.1
1.81699	36.8586	18.172	0.1
1.82115	36.8231	18.2136	0.1
1.82531	36.7888	18.2552	0.1
1.82947	36.7551	18.2968	0.1
1.83363	36.7205	18.3384	0.1
1.83778	36.6841	18.38	0.1
1.84194	36.647	18.4215	0.1
1.8461	36.6127	18.4631	0.1
1.85026	36.5802	18.5047	0.1
1.85441	36.5466	18.5463	0.1
1.85857	36.5097	18.5879	0.1
1.86273	36.4726	18.6295	0.1
1.86689	36.4372	18.6711	0.1
1.87105	36.4009	18.7126	0.1
1.8752	36.3665	18.7542	0.1
1.87936	36.3319	18.7958	0.1
1.88352	36.2948	18.8374	0.1
1.88768	36.2567	18.879	0.1
1.89184	36.2204	18.9205	0.1
1.89599	36.1823	18.9621	0.1
1.90015	36.1439	19.0037	0.1
1.90431	36.1076	19.0453	0.1
1.90847	36.07	19.0869	0.1
1.91263	36.0301	19.1285	0.1
1.91678	35.9909	19.17	0.1
1.92094	35.9537	19.2116	0.1
1.9251	35.9182	19.2532	0.1
1.92926	35.8799	19.2948	0.1
1.93342	35.8415	19.3364	0.1
1.93757	35.8038	19.378	0.1
1.94173	35.7691	19.4196	0.1
1.94589	35.7352	19.4611	0.1
1.95005	35.7003	19.5027	0.1
1.9542	35.6638	19.5443	0.1
1.95836	35.6309	19.5859	0.1
1.96252	35.5997	19.6275	0.1
1.96668	35.5666	19.669	0.1
1.97084	35.5317	19.7106	0.1
1.97499	35.4962	19.7522	0.1
1.97915	35.4626	19.7938	0.1
1.98331	35.4307	19.8354	0.1
1.98747	35.3987	19.877	0.1
1.99162	35.3679	19.9186	0.1
1.99578	35.3371	19.9601	0.1
1.99994	35.3064	20.0017	0.1
2.0041	35.2753	20.0433	0.1
2.00826	35.2438	20.0849	0.1
2.01241	35.2124	20.1265	0.1
2.01657	35.1805	20.1681	0.1
2.02073	35.1501	20.2096	0.1
2.02489	35.1238	20.2512	0.1
2.02905	35.0961	20.2928	0.1
2.0332	35.0689	20.3344	0.1
2.03736	35.0425	20.376	0.1
2.04152	35.0152	20.4176	0.1
2.04568	34.987	20.4591	0.1
2.04983	34.9584	20.5007	0.1
2.05399	34.9287	20.5423	0.1
2.05815	34.9006	20.5839	0.1
2.06231	34.8725	20.6255	0.1
2.06647	34.8431	20.6671	0.1
2.07063	34.815	20.7086	0.1
2.07478	34.7864	20.7502	0.1
2.07894	34.7578	20.7918	0.1
2.0831	34.7289	20.8334	0.1
2.08726	34.7004	20.875	0.1
2.09141	34.6729	20.9166	0.1
2.09557	34.6458	20.9581	0.1
2.09973	34.6172	20.9997	0.1
2.10389	34.5865	21.0413	0.1
2.10805	34.5553	21.0829	0.1
2.1122	34.5235	21.1245	0.1
2.11636	34.4911	21.1661	0.1
2.12052	34.4595	21.2077	0.1
2.12468	34.4285	21.2492	0.1
2.12884	34.3958	21.2908	0.1
2.13299	34.3618	21.3324	0.1
2.13715	34.3291	21.374	0.1
2.14131	34.2959	21.4156	0.1
2.14547	34.2632	21.4571	0.1
2.14962	34.2304	21.4987	0.1
2.15378	34.197	21.5403	0.1
2.15794	34.1647	21.5819	0.1
2.1621	34.1321	21.6235	0.1
2.16626	34.0983	21.6651	0.1
2.17041	34.0664	21.7066	0.1
2.17457	34.035	21.7482	0.1
2.17873	34.0043	21.7898	0.1
2.18289	33.9751	21.8314	0.1
2.18705	33.9439	21.873	0.1
2.1912	33.912	21.9146	0.1
2.19536	33.8807	21.9562	0.1
2.19952	33.8484	21.9977	0.1
2.20368	33.8147	22.0393	0.1
2.20784	33.782	22.0809	0.1
2.21199	33.7499	22.1225	0.1
2.21615	33.719	22.1641	0.1
2.22031	33.6906	22.2056	0.1
2.22447	33.6638	22.2472	0.1
2.22862	33.6354	22.2888	0.1
2.23278	33.6052	22.3304	0.1
2.23694	33.5761	22.372	0.1
2.2411	33.5472	22.4136	0.1
2.24526	33.5182	22.4552	0.1
2.24941	33.4894	22.4967	0.1
2.25357	33.4603	22.5383	0.1
2.25773	33.4324	22.5799	0.1
2.26189	33.4045	22.6215	0.1
2.26605	33.3774	22.6631	0.1
2.2702	33.3517	22.7047	0.1
2.27436	33.3259	22.7462	0.1
2.27852	33.2992	22.7878	0.1
2.28268	33.2716	22.8294	0.1
2.28683	33.2426	22.871	0.1
2.29099	33.2139	22.9126	0.1
2.29515	33.1852	22.9542	0.1
2.29931	33.1569	22.9958	0.1
2.30347	33.1294	23.0373	0.1
2.30762	33.1028	23.0789	0.1
2.31178	33.0767	23.1205	0.1
2.31594	33.0509	23.1621	0.1
2.3201	33.0242	23.2037	0.1
2.32426	32.9966	23.2452	0.1
2.32841	32.9672	23.2868	0.1
2.33257	32.9379	23.3284	0.1
2.33673	32.9108	23.37	0.1
2.34089	32.8846	23.4116	0.1
2.34504	32.8571	23.4532	0.1
2.3492	32.8286	23.4947	0.1
2.35336	32.8001	23.5363	0.1
2.35752	32.7721	23.5779	0.1
2.36168	32.7431	23.6195	0.1
2.36583	32.7126	23.6611	0.1
2.36999	32.6809	23.7027	0.1
2.37415	32.6484	23.7443	0.1
2.37831	32.6155	23.7858	0.1
2.38247	32.5821	23.8274	0.1
2.38662	32.5489	23.869	0.1
2.39078	32.5181	23.9106	0.1
2.39494	32.4892	23.9522	0.1
2.3991	32.4602	23.9937	0.1
2.40326	32.4294	24.0353	0.1
2.40741	32.3974	24.0769	0.1
2.41157	32.3672	24.1185	0.1
2.41573	32.3381	24.1601	0.1
2.41989	32.3087	24.2017	0.1
2.42405	32.2791	24.2432	0.1
2.4282	32.2486	24.2848	0.1
2.43236	32.2176	24.3264	0.1
2.43652	32.1874	24.368	0.1
2.44068	32.1574	24.4096	0.1
2.44483	32.1275	24.4512	0.1
2.44899	32.0978	24.4928	0.1
2.45315	32.0688	24.5343	0.1
2.45731	32.0395	24.5759	0.1
2.46147	32.0089	24.6175	0.1
2.46562	31.979	24.6591	0.1
2.46978	31.9521	24.7007	0.1
2.47394	31.9271	24.7423	0.1
2.4781	31.9018	24.7838	0.1
2.48225	31.8772	24.8254	0.1
2.48641	31.8528	24.867	0.1
2.49057	31.8289	24.9086	0.1
2.49473	31.8043	24.9502	0.1
2.49889	31.7781	24.9918	0.1
2.50305	31.7505	25.0333	0.1
2.5072	31.7239	25.0749	0.1
2.51136	31.6995	25.1165	0.1
2.51552	31.6744	25.1581	0.1
2.51968	31.6473	25.1997	0.1
2.52383	31.6193	25.2413	0.1
2.52799	31.5923	25.2828	0.1
2.53215	31.5658	25.3244	0.1
2.53631	31.5416	25.366	0.1
2.54047	31.5195	25.4076	0.1
2.54462	31.4949	25.4492	0.1
2.54878	31.4682	25.4908	0.1
2.55294	31.4427	25.5324	0.1
2.5571	31.4181	25.5739	0.1
2.56126	31.3934	25.6155	0.1
2.56541	31.3703	25.6571	0.1
2.56957	31.3466	25.6987	0.1
2.57373	31.3203	25.7403	0.1
2.57789	31.2928	25.7818	0.1
2.58204	31.2673	25.8234	0.1
2.5862	31.2427	25.865	0.1
2.59036	31.2184	25.9066	0.1
2.59452	31.194	25.9482	0.1
2.59868	31.1693	25.9898	0.1
2.60283	31.1443	26.0313	0.1
2.60699	31.1206	26.0729	0.1
2.61115	31.0964	26.1145	0.1
2.61531	31.072	26.1561	0.1
2.61946	31.0489	26.1977	0.1
2.62362	31.0265	26.2393	0.1
2.62778	31.0061	26.2809	0.1
2.63194	30.9852	26.3224	0.1
2.6361	30.9634	26.364	0.1
2.64025	30.9404	26.4056	0.1
2.64441	30.9155	26.4472	0.1
2.64857	30.8927	26.4888	0.1
2.65273	30.8715	26.5303	0.1
2.65689	30.8495	26.5719	0.1
2.66104	30.8267	26.6135	0.1
2.6652	30.8045	26.6551	0.1
2.66936	30.7822	26.6967	0.1
2.67352	30.7604	26.7383	0.1
2.67767	30.7395	26.7798	0.1
2.68183	30.7182	26.8214	0.1
2.68599	30.6974	26.863	0.1
2.69015	30.6768	26.9046	0.1
2.69431	30.6572	26.9462	0.1
2.69847	30.6379	26.9878	0.1
2.70262	30.6171	27.0294	0.1
2.70678	30.5963	27.0709	0.1
2.71094	30.5746	27.1125	0.1
2.7151	30.5536	27.1541	0.1
2.71925	30.5325	27.1957	0.1
2.72341	30.5109	27.2373	0.1
2.72757	30.49	27.2789	0.1
2.73173	30.4678	27.3204	0.1
2.73589	30.4464	27.362	0.1
2.74004	30.4258	27.4036	0.1
2.7442	30.4041	27.4452	0.1
2.74836	30.3836	27.4868	0.1
2.75252	30.3614	27.5284	0.1
2.75667	30.3405	27.5699	0.1
2.76083	30.3196	27.6115	0.1
2.76499	30.2998	27.6531	0.1
2.76915	30.281	27.6947	0.1
2.77331	30.2622	27.7363	0.1
2.77746	30.2423	27.7779	0.1
2.78162	30.2243	27.8194	0.1
2.78578	30.2072	27.861	0.1
2.78994	30.1869	27.9026	0.1
2.7941	30.1663	27.9442	0.1
2.79825	30.1447	27.9858	0.1
2.80241	30.1248	28.0274	0.1
2.80657	30.1063	28.069	0.1
2.81073	30.0882	28.1105	0.1
2.81489	30.0699	28.1521	0.1
2.81904	30.0496	28.1937	0.1
2.8232	30.0304	28.2353	0.1
2.82736	30.0105	28.2769	0.1
2.83152	29.9912	28.3184	0.1
2.83568	29.9734	28.36	0.1
2.83983	29.9534	28.4016	0.1
2.84399	29.9328	28.4432	0.1
2.84815	29.9135	28.4848	0.1
2.85231	29.893	28.5264	0.1
2.85646	29.8735	28.5679	0.1
2.86062	29.8531	28.6095	0.1
2.86478	29.8339	28.6511	0.1
2.86894	29.8149	28.6927	0.1
2.8731	29.7941	28.7343	0.1
2.87725	29.7733	28.7759	0.1
2.88141	29.7525	28.8175	0.1
2.88557	29.7298	28.859	0.1
2.88973	29.7066	28.9006	0.1
2.89389	29.6849	28.9422	0.1
2.89804	29.6644	28.9838	0.1
2.9022	29.6466	29.0254	0.1
2.90636	29.6273	29.0669	0.1
2.91052	29.6075	29.1085	0.1
2.91467	29.5881	29.1501	0.1
2.91883	29.5689	29.1917	0.1
2.92299	29.5511	29.2333	0.1
2.92715	29.5304	29.2749	0.1
2.93131	29.5085	29.3164	0.1
2.93546	29.4869	29.358	0.1
2.93962	29.467	29.3996	0.1
2.94378	29.4489	29.4412	0.1
2.94794	29.4302	29.4828	0.1
2.9521	29.4111	29.5244	0.1
2.95625	29.3927	29.566	0.1
2.96041	29.3735	29.6075	0.1
2.96457	29.3539	29.6491	0.1
2.96873	29.3355	29.6907	0.1
2.97289	29.3151	29.7323	0.1
2.97704	29.2968	29.7739	0.1
2.9812	29.2784	29.8155	0.1
2.98536	29.2607	29.857	0.1
2.98952	29.2434	29.8986	0.1
2.99368	29.2253	29.9402	0.1
2.99783	29.2061	29.9818	0.1
3.00199	29.186	30.0234	0.1
3.00615	29.1649	30.065	0.1
3.01031	29.1438	30.1065	0.1
3.01446	29.125	30.1481	0.1
3.01862	29.1046	30.1897	0.1
3.02278	29.0837	30.2313	0.1
3.02694	29.0638	30.2729	0.1
3.0311	29.045	30.3145	0.1
3.03525	29.026	30.356	0.1
3.03941	29.0073	30.3976	0.602207
3.04357	28.9855	30.4392	0.7
3.04773	28.9656	30.4808	0.7
3.05188	28.9463	30.5224	0.7
3.05604	28.9269	30.564	0.7
3.0602	28.906	30.6056	0.7
3.06436	28.8866	30.6471	0.7
3.06852	28.8684	30.6887	0.7
3.07267	28.8481	30.7303	0.7
3.07683	28.8269	30.7719	0.7
3.08099	28.8062	30.8135	0.7
3.08515	28.7866	30.855	0.7
3.08931	28.7655	30.8966	0.7
3.09346	28.7459	30.9382	0.7
3.09762	28.726	30.9798	0.7
3.10178	28.7065	31.0214	0.7
3.10594	28.6874	31.063	0.7
3.11009	28.6665	31.1045	0.7
3.11425	28.6476	31.1461	0.7
3.11841	28.6285	31.1877	0.7
3.12257	28.6084	31.2293	0.7
3.12673	28.5888	31.2709	0.7
3.13089	28.5664	31.3125	0.7
3.13504	28.5454	31.3541	0.7
3.1392	28.5263	31.3956	0.7
3.14336	28.5059	31.4372	0.7
3.14752	28.487	31.4788	0.7
3.15167	28.4655	31.5204	0.7
3.15583	28.4442	31.562	0.7
3.15999	28.4231	31.6035	0.7
3.16415	28.4023	31.6451	0.7
3.16831	28.3812	31.6867	0.7
3.17246	28.3594	31.7283	0.7
3.17662	28.3385	31.7699	0.7
3.18078	28.319	31.8115	0.7
3.18494	28.2992	31.8531	0.7
3.1891	28.2764	31.8946	0.7
3.19325	28.2564	31.9362	0.7
3.19741	28.2359	31.9778	0.7
3.20157	28.2155	32.0194	0.7
3.20573	28.1971	32.061	0.7
3.20988	28.1769	32.1026	0.7
3.21404	28.1557	32.1441	0.7
3.2182	28.1356	32.1857	0.7
3.22236	28.1151	32.2273	0.7
3.22652	28.0984	32.2689	0.7
3.23067	28.0827	32.3105	0.7
3.23483	28.0679	32.3521	0.7
3.23899	28.0501	32.3936	0.7
3.24315	28.0337	32.4352	0.7
3.2473	28.0172	32.4768	0.7
3.25146	27.9995	32.5184	0.7
3.25562	27.98	32.56	0.7
3.25978	27.9631	32.6016	0.7
3.26394	27.9476	32.6431	0.7
3.2681	27.9333	32.6847	0.7
3.27225	27.9175	32.7263	0.7
3.27641	27.9018	32.7679	0.7
3.28057	27.8874	32.8095	0.7
3.28473	27.8729	32.8511	0.7
3.28888	27.8582	32.8927	0.7
3.29304	27.8461	32.9342	0.7
3.2972	27.8317	32.9758	0.7
3.30136	27.8178	33.0174	0.7
3.30552	27.805	33.059	0.7
3.30967	27.7909	33.1006	0.7
3.31383	27.7751	33.1422	0.7
3.31799	27.7622	33.1837	0.7
3.32215	27.7457	33.2253	0.7
3.32631	27.7317	33.2669	0.7
3.33046	27.7158	33.3085	0.7
3.33462	27.6996	33.3501	0.7
3.33878	27.6847	33.3916	0.7
3.34294	27.6711	33.4332	0.7
3.34709	27.6557	33.4748	0.7
3.35125	27.6396	33.5164	0.7
3.35541	27.6219	33.558	0.7
3.35957	27.6069	33.5996	0.7
3.36373	27.5926	33.6412	0.7
3.36788	27.5766	33.6827	0.7
3.37204	27.5591	33.7243	0.7
3.3762	27.5423	33.7659	0.7
3.38036	27.5265	33.8075	0.7
3.38451	27.5092	33.8491	0.7
3.38867	27.492	33.8907	0.7
3.39283	27.4749	33.9322	0.7
3.39699	27.4583	33.9738	0.7
3.40115	27.4418	34.0154	0.7
3.4053	27.4249	34.057	0.7
3.40946	27.4092	34.0986	0.7
3.41362	27.3943	34.1402	0.7
3.41778	27.3792	34.1817	0.7
3.42194	27.3652	34.2233	0.7
3.42609	27.3514	34.2649	0.7
3.43025	27.333	34.3065	0.7
3.43441	27.3165	34.3481	0.7
3.43857	27.3014	34.3897	0.7
3.44273	27.2844	34.4312	0.7
3.44688	27.266	34.4728	0.7
3.45104	27.2507	34.5144	0.7
3.4552	27.2366	34.556	0.7
3.45936	27.2223	34.5976	0.7
3.46352	27.2094	34.6392	0.7
3.46767	27.1931	34.6807	0.7
3.47183	27.1762	34.7223	0.7
3.47599	27.1614	34.7639	0.7
3.48015	27.1469	34.8055	0.7
3.4843	27.1328	34.8471	0.7
3.48846	27.1175	34.8887	0.7
3.49262	27.1006	34.9302	0.7
3.49678	27.0835	34.9718	0.7
3.50094	27.0663	35.0134	0.7
3.50509	27.0502	35.055	0.7
3.50925	27.0348	35.0966	0.7
3.51341	27.0187	35.1382	0.7
3.51757	27.0008	35.1797	0.7
3.52172	26.9859	35.2213	0.7
3.52588	26.9682	35.2629	0.7
3.53004	26.9513	35.3045	0.7
3.5342	26.9359	35.3461	0.7
3.53836	26.9194	35.3877	0.7
3.54251	26.9013	35.4293	0.7
3.54667	26.885	35.4708	0.7
3.55083	26.8719	35.5124	0.7
3.55499	26.8549	35.554	0.7
3.55915	26.8369	35.5956	0.7
3.5633	26.8207	35.6372	0.7
3.56746	26.8027	35.6788	0.7
3.57162	26.7832	35.7203	0.7
3.57578	26.7651	35.7619	0.7
3.57994	26.7488	35.8035	0.7
3.58409	26.7337	35.8451	0.7
3.58825	26.7176	35.8867	0.7
3.59241	26.6978	35.9282	0.7
3.59657	26.6832	35.9698	0.7
3.60073	26.6678	36.0114	0.7
3.60488	26.6515	36.053	0.7
3.60904	26.6359	36.0946	0.7
3.6132	26.6193	36.1362	0.7
3.61736	26.6006	36.1778	0.7
3.62152	26.5849	36.2193	0.7
3.62567	26.569	36.2609	0.7
3.62983	26.5529	36.3025	0.7
3.63399	26.5383	36.3441	0.7
3.63815	26.5236	36.3857	0.7
3.6423	26.507	36.4273	0.7
3.64646	26.4898	36.4688	0.7
3.65062	26.476	36.5104	0.7
3.65478	26.4613	36.552	0.7
3.65894	26.4497	36.5936	0.7
3.66309	26.4359	36.6352	0.7
3.66725	26.4224	36.6768	0.7
3.67141	26.4097	36.7183	0.7
3.67557	26.3976	36.7599	0.7
3.67972	26.3865	36.8015	0.7
3.68388	26.3729	36.8431	0.7
3.68804	26.3583	36.8847	0.7
3.6922	26.3422	36.9263	0.7
3.69636	26.3314	36.9678	0.7
3.70051	26.3173	37.0094	0.7
3.70467	26.3055	37.051	0.7
3.70883	26.2921	37.0926	0.7
3.71299	26.278	37.1342	0.7
3.71715	26.2629	37.1758	0.7
3.7213	26.2495	37.2173	0.7
3.72546	26.2378	37.2589	0.7
3.72962	26.2222	37.3005	0.7
3.73378	26.2092	37.3421	0.7
3.73793	26.1948	37.3837	0.7
3.74209	26.1798	37.4253	0.7
3.74625	26.1653	37.4669	0.7
3.75041	26.153	37.5084	0.7
3.75457	26.1391	37.55	0.7
3.75873	26.1265	37.5916	0.7
3.76288	26.1119	37.6332	0.7
3.76704	26.0983	37.6748	0.7
3.7712	26.0851	37.7163	0.7
3.77536	26.0704	37.7579	0.7
3.77951	26.0576	37.7995	0.7
3.78367	26.042	37.8411	0.7
3.78783	26.0251	37.8827	0.7
3.79199	26.0105	37.9243	0.7
3.79615	25.9965	37.9659	0.7
3.8003	25.9827	38.0074	0.7
3.80446	25.9677	38.049	0.7
3.80862	25.9521	38.0906	0.7
3.81278	25.9361	38.1322	0.7
3.81693	25.9213	38.1738	0.7
3.82109	25.9063	38.2154	0.7
3.82525	25.8895	38.2569	0.7
3.82941	25.8717	38.2985	0.7
3.83357	25.8573	38.3401	0.7
3.83772	25.8429	38.3817	0.7
3.84188	25.8285	38.4233	0.7
3.84604	25.813	38.4648	0.7
3.8502	25.7978	38.5064	0.7
3.85436	25.7798	38.548	0.7
3.85851	25.7634	38.5896	0.7
3.86267	25.7456	38.6312	0.7
3.86683	25.7286	38.6728	0.7
3.87099	25.7134	38.7144	0.7
3.87514	25.6962	38.7559	0.7
3.8793	25.6813	38.7975	0.7
3.88346	25.665	38.8391	0.7
3.88762	25.6491	38.8807	0.7
3.89178	25.6333	38.9223	0.7
3.89594	25.6166	38.9639	0.7
3.90009	25.5998	39.0054	0.7
3.90425	25.5828	39.047	0.7
3.90841	25.5679	39.0886	0.7
3.91257	25.5504	39.1302	0.7
3.91672	25.5341	39.1718	0.7
3.92088	25.5167	39.2134	0.7
3.92504	25.5016	39.2549	0.7
3.9292	25.4859	39.2965	0.7
3.93336	25.4701	39.3381	0.7
3.93751	25.4549	39.3797	0.7
3.94167	25.4387	39.4213	0.7
3.94583	25.4235	39.4629	0.7
3.94999	25.4073	39.5044	0.7
3.95415	25.3913	39.546	0.7
3.9583	25.3783	39.5876	0.7
3.96246	25.3621	39.6292	0.7
3.96662	25.3473	39.6708	0.7
3.97078	25.3334	39.7124	0.7
3.97493	25.3196	39.7539	0.7
3.97909	25.3072	39.7955	0.7
3.98325	25.2931	39.8371	0.7
3.98741	25.2798	39.8787	0.7
3.99157	25.2695	39.9203	0.7
3.99572	25.258	39.9619	0.7
3.99988	25.2433	40.0035	0.7
4.00404	25.2312	40.045	0.7
4.0082	25.218	40.0866	0.7
4.01236	25.2044	40.1282	0.7
4.01651	25.1918	40.1698	0.7
4.02067	25.1804	40.2114	0.7
4.02483	25.1702	40.2529	0.7
4.02899	25.1555	40.2945	0.7
4.03315	25.1431	40.3361	0.7
4.0373	25.1298	40.3777	0.7
4.04146	25.1134	40.4193	0.7
4.04562	25.0995	40.4609	0.7
4.04978	25.0862	40.5025	0.7
4.05393	25.0756	40.544	0.7
4.05809	25.0633	40.5856	0.7
4.06225	25.0494	40.6272	0.7
4.06641	25.0359	40.6688	0.7
4.07057	25.0199	40.7104	0.7
4.07472	25.0024	40.752	0.7
4.07888	24.9867	40.7935	0.7
4.08304	24.9723	40.8351	0.7
4.0872	24.9582	40.8767	0.7
4.09136	24.9439	40.9183	0.7
4.09551	24.9297	40.9599	0.7
4.09967	24.9163	41.0014	0.7
4.10383	24.9032	41.043	0.7
4.10799	24.8871	41.0846	0.7
4.11214	24.8712	41.1262	0.7
4.1163	24.857	41.1678	0.7
4.12046	24.8433	41.2094	0.7
4.12462	24.8278	41.251	0.7
4.12878	24.8125	41.2925	0.7
4.13293	24.7995	41.3341	0.7
4.13709	24.7847	41.3757	0.7
4.14125	24.77	41.4173	0.7
4.14541	24.7581	41.4589	0.7
4.14957	24.7454	41.5005	0.7
4.15372	24.7321	41.542	0.7
4.15788	24.7178	41.5836	0.7
4.16204	24.7059	41.6252	0.7
4.1662	24.6944	41.6668	0.7
4.17035	24.6816	41.7084	0.7
4.17451	24.6683	41.75	0.7
4.17867	24.6551	41.7915	0.7
4.18283	24.6413	41.8331	0.7
4.18699	24.6276	41.8747	0.7
4.19114	24.6143	41.9163	0.7
4.1953	24.6027	41.9579	0.7
4.19946	24.5889	41.9995	0.7
4.20362	24.575	42.041	0.7
4.20778	24.5617	42.0826	0.7
4.21193	24.5487	42.1242	0.7
4.21609	24.5359	42.1658	0.7
4.22025	24.522	42.2074	0.7
4.22441	24.5093	42.249	0.7
4.22856	24.4967	42.2906	0.7
4.23272	24.4846	42.3321	0.7
4.23688	24.4719	42.3737	0.7
4.24104	24.4601	42.4153	0.7
4.2452	24.4483	42.4569	0.7
4.24936	24.4353	42.4985	0.7
4.25351	24.4201	42.5401	0.7
4.25767	24.4063	42.5816	0.7
4.26183	24.3926	42.6232	0.7
4.26599	24.3784	42.6648	0.7
4.27014	24.3627	42.7064	0.7
4.2743	24.3487	42.748	0.7
4.27846	24.337	42.7895	0.7
4.28262	24.3244	42.8311	0.7
4.28678	24.3104	42.8727	0.7
4.29093	24.296	42.9143	0.7
4.29509	24.2818	42.9559	0.7
4.29925	24.2671	42.9975	0.7
4.30341	24.2521	43.0391	0.7
4.30757	24.2368	43.0806	0.7
4.31172	24.223	43.1222	0.7
4.31588	24.2079	43.1638	0.7
4.32004	24.1927	43.2054	0.7
4.3242	24.1771	43.247	0.7
4.32835	24.1602	43.2886	0.7
4.33251	24.1435	43.3301	0.7
4.33667	24.127	43.3717	0.7
4.34083	24.1123	43.4133	0.7
4.34499	24.0968	43.4549	0.7
4.34914	24.0806	43.4965	0.7
4.3533	24.0625	43.5381	0.7
4.35746	24.0436	43.5796	0.7
4.36162	24.0237	43.6212	0.7
4.36578	24.0061	43.6628	0.7
4.36993	23.9893	43.7044	0.7
4.37409	23.9735	43.746	0.7
4.37825	23.9572	43.7876	0.7
4.38241	23.9409	43.8291	0.7
4.38657	23.9251	43.8707	0.7
4.39072	23.9082	43.9123	0.7
4.39488	23.8904	43.9539	0.7
4.39904	23.8745	43.9955	0.7
4.4032	23.8577	44.0371	0.7
4.40735	23.8422	44.0786	0.7
4.41151	23.8277	44.1202	0.7
4.41567	23.8122	44.1618	0.7
4.41983	23.7985	44.2034	0.7
4.42399	23.7854	44.245	0.7
4.42814	23.772	44.2866	0.7
4.4323	23.7583	44.3281	0.7
4.43646	23.745	44.3697	0.7
4.44062	23.7313	44.4113	0.7
4.44477	23.7152	44.4529	0.7
4.44893	23.7022	44.4945	0.7
4.45309	23.6889	44.5361	0.7
4.45725	23.6763	44.5776	0.7
4.46141	23.6654	44.6192	0.7
4.46556	23.6537	44.6608	0.7
4.46972	23.6404	44.7024	0.7
4.47388	23.6275	44.744	0.7
4.47804	23.6143	44.7856	0.7
4.4822	23.601	44.8272	0.7
4.48635	23.5874	44.8687	0.7
4.49051	23.5733	44.9103	0.7
4.49467	23.5597	44.9519	0.7
4.49883	23.5454	44.9935	0.7
4.50298	23.5302	45.0351	0.7
4.50714	23.5173	45.0767	0.7
4.5113	23.5056	45.1182	0.7
4.51546	23.4939	45.1598	0.7
4.51962	23.482	45.2014	0.7
4.52377	23.4702	45.243	0.7
4.52793	23.4591	45.2846	0.7
4.53209	23.4467	45.3261	0.7
4.53625	23.4343	45.3677	0.7
4.54041	23.4218	45.4093	0.7
4.54456	23.4102	45.4509	0.7
4.54872	23.3994	45.4925	0.7
4.55288	23.3866	45.5341	0.7
4.55704	23.3736	45.5757	0.7
4.5612	23.3606	45.6172	0.7
4.56535	23.3466	45.6588	0.7
4.56951	23.3329	45.7004	0.7
4.57367	23.3185	45.742	0.7
4.57783	23.3026	45.7836	0.7
4.58199	23.288	45.8252	0.7
4.58614	23.2746	45.8667	0.7
4.5903	23.2617	45.9083	0.7
4.59446	23.2509	45.9499	0.7
4.59862	23.2393	45.9915	0.7
4.60278	23.2272	46.0331	0.7
4.60693	23.2138	46.0746	0.7
4.61109	23.1984	46.1162	0.7
4.61525	23.1824	46.1578	0.7
4.61941	23.169	46.1994	0.7
4.62356	23.1567	46.241	0.7
4.62772	23.1432	46.2826	0.7
4.63188	23.1287	46.3242	0.7
4.63604	23.1167	46.3657	0.7
4.6402	23.1051	46.4073	0.7
4.64435	23.0923	46.4489	0.7
4.64851	23.0777	46.4905	0.7
4.65267	23.0631	46.5321	0.7
4.65683	23.0489	46.5737	0.7
4.66099	23.0361	46.6152	0.7
4.66514	23.0242	46.6568	0.7
4.6693	23.0127	46.6984	0.7
4.67346	23.0012	46.74	0.7
4.67762	22.9897	46.7816	0.7
4.68177	22.9789	46.8232	0.7
4.68593	22.9683	46.8647	0.7
4.69009	22.9559	46.9063	0.7
4.69425	22.9426	46.9479	0.7
4.69841	22.9291	46.9895	0.7
4.70256	22.9174	47.0311	0.7
4.70672	22.9066	47.0727	0.7
4.71088	22.895	47.1142	0.7
4.71504	22.8833	47.1558	0.7
4.7192	22.8723	47.1974	0.7
4.72335	22.86	47.239	0.7
4.72751	22.8477	47.2806	0.7
4.73167	22.8367	47.3222	0.7
4.73583	22.8248	47.3638	0.7
4.73998	22.8128	47.4053	0.7
4.74414	22.8022	47.4469	0.7
4.7483	22.7912	47.4885	0.7
4.75246	22.7788	47.5301	0.7
4.75662	22.7662	47.5717	0.7
4.76077	22.7546	47.6133	0.7
4.76493	22.7425	47.6548	0.7
4.76909	22.7301	47.6964	0.7
4.77325	22.7178	47.738	0.7
4.77741	22.7047	47.7796	0.7
4.78156	22.692	47.8212	0.7
4.78572	22.678	47.8627	0.7
4.78988	22.6625	47.9043	0.7
4.79404	22.6479	47.9459	0.7
4.79819	22.6339	47.9875	0.7
4.80235	22.62	48.0291	0.7
4.80651	22.6056	48.0707	0.7
4.81067	22.5914	48.1123	0.7
4.81483	22.5786	48.1538	0.7
4.81898	22.5652	48.1954	0.7
4.82314	22.5494	48.237	0.7
4.8273	22.5344	48.2786	0.7
4.83146	22.5213	48.3202	0.7
4.83562	22.5082	48.3618	0.7
4.83977	22.4958	48.4033	0.7
4.84393	22.4833	48.4449	0.7
4.84809	22.4684	48.4865	0.7
4.85225	22.454	48.5281	0.7
4.8564	22.4421	48.5697	0.7
4.86056	22.4282	48.6113	0.7
4.86472	22.4141	48.6528	0.7
4.86888	22.4015	48.6944	0.7
4.87304	22.3899	48.736	0.7
4.8772	22.3782	48.7776	0.7
4.88135	22.3661	48.8192	0.7
4.88551	22.3543	48.8608	0.7
4.88967	22.3433	48.9023	0.7
4.89383	22.3325	48.9439	0.7
4.89798	22.3205	48.9855	0.7
4.90214	22.3084	49.0271	0.7
4.9063	22.2968	49.0687	0.7
4.91046	22.2859	49.1103	0.7
4.91462	22.276	49.1518	0.7
4.91877	22.2645	49.1934	0.7
4.92293	22.2518	49.235	0.7
4.92709	22.2395	49.2766	0.7
4.93125	22.2261	49.3182	0.7
4.93541	22.2121	49.3598	0.7
4.93956	22.1993	49.4013	0.7
4.94372	22.1875	49.4429	0.7
4.94788	22.175	49.4845	0.7
4.95204	22.1624	49.5261	0.7
4.95619	22.1505	49.5677	0.7
4.96035	22.1375	49.6093	0.7
4.96451	22.1261	49.6508	0.7
4.96867	22.1133	49.6924	0.7
4.97283	22.0987	49.734	0.7
4.97698	22.0854	49.7756	0.7
4.98114	22.0742	49.8172	0.7
4.9853	22.0654	49.8588	0.7
4.98946	22.0558	49.9004	0.7
4.99362	22.0449	49.9419	0.7
4.99777	22.0329	49.9835	0.7
5.00193	22.0214	50.0251	0.7
5.00609	22.0099	50.0667	0.7
5.01025	21.9979	50.1083	0.7
5.01441	21.9848	50.1499	0.7
5.01856	21.9696	50.1914	0.7
5.02272	21.956	50.233	0.7
5.02688	21.944	50.2746	0.7
5.03104	21.9308	50.3162	0.7
5.03519	21.9171	50.3578	0.7
5.03935	21.9013	50.3993	0.7
5.04351	21.8857	50.4409	0.7
5.04767	21.8715	50.4825	0.7
5.05183	21.8583	50.5241	0.7
5.05598	21.8469	50.5657	0.7
5.06014	21.836	50.6073	0.7
5.0643	21.8235	50.6489	0.7
5.06846	21.8101	50.6904	0.7
5.07261	21.7983	50.732	0.7
5.07677	21.7871	50.7736	0.7
5.08093	21.7744	50.8152	0.7
5.08509	21.7602	50.8568	0.7
5.08925	21.7444	50.8984	0.7
5.0934	21.728	50.9399	0.7
5.09756	21.7136	50.9815	0.7
5.10172	21.7002	51.0231	0.7
5.10588	21.686	51.0647	0.7
5.11004	21.6734	51.1063	0.7
5.11419	21.6595	51.1479	0.7
5.11835	21.6466	51.1894	0.7
5.12251	21.6356	51.231	0.7
5.12667	21.6245	51.2726	0.7
5.13083	21.6126	51.3142	0.7
5.13498	21.6016	51.3558	0.7
5.13914	21.5363	51.3974	0.7
5.1433	21.2811	51.4389	0.7
5.14746	21.2242	51.4805	0.7
5.15161	21.2071	51.5221	0.7
5.15577	21.1933	51.5637	0.7
5.15993	21.1693	51.6053	0.7
5.16409	21.1427	51.6469	0.7
5.16825	21.1329	51.6885	0.7
5.1724	21.1392	51.73	0.7
5.17656	21.1819	51.7716	0.7
5.18072	21.2145	51.8132	0.7
5.18488	21.3188	51.8548	0.7
5.18904	21.43	51.8964	0.7
5.19319	21.4929	51.938	0.7
5.19735	21.5051	51.9795	0.7
5.20151	21.4701	52.0211	0.7
5.20567	21.4301	52.0627	0.7
5.20983	21.401	52.1043	0.7
5.21398	21.3739	52.1459	0.7
5.21814	21.3452	52.1874	0.7
5.2223	21.3289	52.229	0.7
5.22646	21.3195	52.2706	0.7
5.23062	21.3104	52.3122	0.7
5.23477	21.3058	52.3538	0.7
5.23893	21.3233	52.3954	0.7
5.24309	21.3663	52.437	0.7
5.24725	21.4293	52.4785	0.7
5.2514	21.5055	52.5201	0.7
5.25556	21.5616	52.5617	0.7
5.25972	21.6094	52.6033	0.7
5.26388	21.6719	52.6449	0.7
5.26804	21.7381	52.6865	0.7
5.27219	21.7859	52.728	0.7
5.27635	21.8319	52.7696	0.7
5.28051	21.8894	52.8112	0.7
5.28467	21.9687	52.8528	0.7
5.28883	22.0842	52.8944	0.7
5.29298	22.2181	52.9359	0.7
5.29714	22.3694	52.9775	0.7
5.3013	22.5171	53.0191	0.7
5.30546	22.6522	53.0607	0.7
5.30961	22.7733	53.1023	0.7
5.31377	22.8834	53.1439	0.7
5.31793	22.9828	53.1855	0.7
5.32209	23.0667	53.227	0.7
5.32625	23.1385	53.2686	0.7
5.3304	23.2024	53.3102	0.7
5.33456	23.264	53.3518	0.7
5.33872	23.3154	53.3934	0.7
5.34288	23.3424	53.435	0.7
5.34703	23.3357	53.4765	0.7
5.35119	23.3021	53.5181	0.7
5.35535	23.2574	53.5597	0.7
5.35951	23.2198	53.6013	0.7
5.36367	23.181	53.6429	0.7
5.36782	23.1374	53.6845	0.7
5.37198	23.0874	53.726	0.7
5.37614	23.0248	53.7676	0.7
5.3803	22.953	53.8092	0.7
5.38446	22.884	53.8508	0.7
5.38861	22.8224	53.8924	0.7
5.39277	22.7589	53.934	0.7
5.39693	22.6969	53.9755	0.7
5.40109	22.6359	54.0171	0.7
5.40525	22.5771	54.0587	0.7
5.4094	22.5232	54.1003	0.7
5.41356	22.4768	54.1419	0.7
5.41772	22.441	54.1835	0.7
5.42188	22.418	54.225	0.7
5.42603	22.4016	54.2666	0.7
5.43019	22.3944	54.3082	0.7
5.43435	22.3944	54.3498	0.7
5.43851	22.4016	54.3914	0.7
5.44267	22.4154	54.433	0.7
5.44682	22.4297	54.4746	0.7
5.45098	22.4493	54.5161	0.7
5.45514	22.4721	54.5577	0.7
5.4593	22.4963	54.5993	0.7
5.46346	22.5167	54.6409	0.7
5.46761	22.534	54.6825	0.7
5.47177	22.5481	54.724	0.7
5.47593	22.5603	54.7656	0.7
5.48009	22.5697	54.8072	0.7
5.48424	22.572	54.8488	0.7
5.4884	22.5697	54.8904	0.7
5.49256	22.5638	54.932	0.7
5.49672	22.5536	54.9736	0.7
5.50088	22.5381	55.0151	0.7
5.50504	22.5162	55.0567	0.7
5.50919	22.4906	55.0983	0.7
5.51335	22.464	55.1399	0.7
5.51751	22.433	55.1815	0.7
5.52167	22.4013	55.2231	0.7
5.52582	22.3642	55.2646	0.7
5.52998	22.3257	55.3062	0.7
5.53414	22.2842	55.3478	0.7
5.5383	22.2404	55.3894	0.7
5.54246	22.1952	55.431	0.7
5.54661	22.1511	55.4725	0.7
5.55077	22.1101	55.5141	0.7
5.55493	22.0714	55.5557	0.7
5.55909	22.0344	55.5973	0.7
5.56325	21.9951	55.6389	0.7
5.5674	21.9568	55.6805	0.7
5.57156	21.9194	55.7221	0.7
5.57572	21.8812	55.7636	0.7
5.57988	21.8472	55.8052	0.7
5.58403	21.8129	55.8468	0.7
5.58819	21.7822	55.8884	0.7
5.59235	21.7534	55.93	0.7
5.59651	21.7255	55.9716	0.7
5.60067	21.6956	56.0131	0.7
5.60482	21.6665	56.0547	0.7
5.60898	21.6395	56.0963	0.7
5.61314	21.6141	56.1379	0.7
5.6173	21.5885	56.1795	0.7
5.62146	21.5636	56.2211	0.7
5.62561	21.5395	56.2626	0.7
5.62977	21.5158	56.3042	0.7
5.63393	21.492	56.3458	0.7
5.63809	21.4701	56.3874	0.7
5.64224	21.4496	56.429	0.7
5.6464	21.4312	56.4706	0.7
5.65056	21.4096	56.5121	0.7
5.65472	21.3885	56.5537	0.7
5.65888	21.367	56.5953	0.7
5.66303	21.3465	56.6369	0.7
5.66719	21.3285	56.6785	0.7
5.67135	21.3081	56.7201	0.7
5.67551	21.2896	56.7617	0.7
5.67967	21.2737	56.8032	0.7
5.68382	21.2521	56.8448	0.7
5.68798	21.2324	56.8864	0.7
5.69214	21.2146	56.928	0.7
5.6963	21.1996	56.9696	0.7
5.70045	21.1839	57.0112	0.7
5.70461	21.1701	57.0527	0.7
5.70877	21.1558	57.0943	0.7
5.71293	21.1418	57.1359	0.7
5.71709	21.1245	57.1775	0.7
5.72124	21.1096	57.2191	0.7
5.7254	21.0952	57.2606	0.7
5.72956	21.0802	57.3022	0.7
5.73372	21.0672	57.3438	0.7
5.73788	21.0542	57.3854	0.7
5.74203	21.0423	57.427	0.7
5.74619	21.034	57.4686	0.7
5.75035	21.0205	57.5102	0.7
5.75451	21.0071	57.5517	0.7
5.75867	20.9923	57.5933	0.7
5.76282	20.9799	57.6349	0.7
5.76698	20.9662	57.6765	0.7
5.77114	20.9544	57.7181	0.7
5.7753	20.945	57.7597	0.7
5.77945	20.9366	57.8012	0.7
5.78361	20.9254	57.8428	0.7
5.78777	20.9178	57.8844	0.7
5.79193	20.9086	57.926	0.7
5.79609	20.8994	57.9676	0.7
5.80024	20.8911	58.0092	0.7
5.8044	20.8822	58.0507	0.7
5.80856	20.8736	58.0923	0.7
5.81272	20.8666	58.1339	0.7
5.81688	20.8582	58.1755	0.7
5.82103	20.8551	58.2171	0.7
5.82519	20.8483	58.2587	0.7
5.82935	20.8445	58.3002	0.7
5.83351	20.8407	58.3418	0.7
5.83767	20.8379	58.3834	0.7
5.84182	20.8352	58.425	0.7
5.84598	20.8314	58.4666	0.7
5.85014	20.8264	58.5082	0.7
5.8543	20.8266	58.5497	0.7
5.85846	20.827	58.5913	0.7
5.86261	20.8277	58.6329	0.7
5.86677	20.8261	58.6745	0.7
5.87093	20.825	58.7161	0.7
5.87509	20.825	58.7577	0.7
5.87924	20.8228	58.7992	0.7
5.8834	20.8209	58.8408	0.7
5.88756	20.822	58.8824	0.7
5.89172	20.8214	58.924	0.7
5.89588	20.8202	58.9656	0.7
5.90003	20.8199	59.0072	0.7
5.90419	20.8193	59.0487	0.7
5.90835	20.8196	59.0903	0.7
5.91251	20.8194	59.1319	0.7
5.91667	20.8188	59.1735	0.7
5.92082	20.8196	59.2151	0.7
5.92498	20.8188	59.2567	0.7
5.92914	20.8197	59.2983	0.7
5.9333	20.8203	59.3398	0.7
5.93745	20.8215	59.3814	0.7
5.94161	20.8216	59.423	0.7
5.94577	20.8232	59.4646	0.7
5.94993	20.8252	59.5062	0.7
5.95409	20.8258	59.5478	0.7
5.95824	20.8243	59.5893	0.7
5.9624	20.8236	59.6309	0.7
5.96656	20.8241	59.6725	0.7
5.97072	20.8225	59.7141	0.7
5.97487	20.8239	59.7557	0.7
5.97903	20.8231	59.7972	0.7
5.98319	20.8236	59.8388	0.7
5.98735	20.8247	59.8804	0.7
5.99151	20.8235	59.922	0.7
5.99566	20.8211	59.9636	0.7
5.99982	20.8204	60.0052	0.7
6.00398	20.8194	60.0468	0.7
6.00814	20.8181	60.0883	0.7
6.0123	20.8172	60.1299	0.7
6.01645	20.8175	60.1715	0.7
6.02061	20.8148	60.2131	0.7
6.02477	20.8138	60.2547	0.7
6.02893	20.8136	60.2963	0.7
6.03309	20.8099	60.3378	0.7
6.03724	20.8071	60.3794	0.7
6.0414	20.804	60.421	0.7
6.04556	20.8004	60.4626	0.7
6.04972	20.7958	60.5042	0.7
6.05387	20.7899	60.5458	0.7
6.05803	20.7853	60.5873	0.7
6.06219	20.7799	60.6289	0.7
6.06635	20.7746	60.6705	0.7
6.07051	20.769	60.7121	0.7
6.07467	20.7631	60.7537	0.7
6.07882	20.7541	60.7953	0.7
6.08298	20.7474	60.8368	0.7
6.08714	20.739	60.8784	0.7
6.0913	20.7305	60.92	0.7
6.09545	20.722	60.9616	0.7
6.09961	20.7163	61.0032	0.7
6.10377	20.7081	61.0448	0.7
6.10793	20.6958	61.0863	0.7
6.11209	20.6853	61.1279	0.7
6.11624	20.6749	61.1695	0.7
6.1204	20.6653	61.2111	0.7
6.12456	20.6565	61.2527	0.7
6.12872	20.6461	61.2943	0.7
6.13288	20.635	61.3359	0.7
6.13703	20.6272	61.3774	0.7
6.14119	20.6158	61.419	0.7
6.14535	20.6047	61.4606	0.7
6.14951	20.5936	61.5022	0.7
6.15366	20.5818	61.5438	0.7
6.15782	20.5694	61.5853	0.7
6.16198	20.5562	61.6269	0.7
6.16614	20.5429	61.6685	0.7
6.1703	20.5276	61.7101	0.7
6.17445	20.5109	61.7517	0.7
6.17861	20.495	61.7933	0.7
6.18277	20.4808	61.8349	0.7
6.18693	20.4653	61.8764	0.7
6.19109	20.4515	61.918	0.7
6.19524	20.4364	61.9596	0.7
6.1994	20.4235	62.0012	0.7
6.20356	20.4087	62.0428	0.7
6.20772	20.3916	62.0844	0.7
6.21187	20.3784	62.1259	0.7
6.21603	20.3608	62.1675	0.7
6.22019	20.3441	62.2091	0.7
6.22435	20.3272	62.2507	0.7
6.22851	20.3151	62.2923	0.7
6.23266	20.3004	62.3338	0.7
6.23682	20.2866	62.3754	0.7
6.24098	20.2703	62.417	0.7
6.24514	20.2561	62.4586	0.7
6.2493	20.2415	62.5002	0.7
6.25345	20.2262	62.5418	0.7
6.25761	20.2117	62.5834	0.7
6.26177	20.1965	62.6249	0.7
6.26593	20.182	62.6665	0.7
6.27008	20.167	62.7081	0.7
6.27424	20.1539	62.7497	0.7
6.2784	20.1414	62.7913	0.7
6.28256	20.1278	62.8329	0.7
6.28672	20.1132	62.8744	0.7
6.29087	20.095	62.916	0.7
6.29503	20.0762	62.9576	0.7
6.29919	20.0594	62.9992	0.7
6.30335	20.0428	63.0408	0.7
6.30751	20.0285	63.0824	0.7
6.31166	20.0156	63.1239	0.7
6.31582	20.0014	63.1655	0.7
6.31998	19.9897	63.2071	0.7
6.32414	19.9735	63.2487	0.7
6.32829	19.9572	63.2903	0.7
6.33245	19.9369	63.3319	0.7
6.33661	19.9198	63.3734	0.7
6.34077	19.9028	63.415	0.7
6.34493	19.8878	63.4566	0.7
6.34908	19.8715	63.4982	0.7
6.35324	19.8552	63.5398	0.7
6.3574	19.8398	63.5814	0.7
6.36156	19.826	63.6229	0.7
6.36572	19.8126	63.6645	0.7
6.36987	19.7969	63.7061	0.7
6.37403	19.7811	63.7477	0.7
6.37819	19.7665	63.7893	0.7
6.38235	19.7503	63.8309	0.7
6.38651	19.7336	63.8724	0.7
6.39066	19.7173	63.914	0.7
6.39482	19.7027	63.9556	0.7
6.39898	19.6887	63.9972	0.7
6.40314	19.6739	64.0388	0.7
6.4073	19.6588	64.0804	0.7
6.41145	19.6431	64.1219	0.7
6.41561	19.6284	64.1635	0.7
6.41977	19.6123	64.2051	0.7
6.42393	19.5932	64.2467	0.7
6.42808	19.5762	64.2883	0.7
6.43224	19.5598	64.3299	0.7
6.4364	19.5428	64.3714	0.7
6.44056	19.5261	64.413	0.7
6.44472	19.5102	64.4546	0.7
6.44887	19.4946	64.4962	0.7
6.45303	19.4804	64.5378	0.7
6.45719	19.467	64.5794	0.7
6.46135	19.4532	64.6209	0.7
6.46551	19.438	64.6625	0.7
6.46966	19.4233	64.7041	0.7
6.47382	19.4112	64.7457	0.7
6.47798	19.399	64.7873	0.7
6.48214	19.3853	64.8289	0.7
6.4863	19.3732	64.8705	0.7
6.49045	19.3631	64.912	0.7
6.49461	19.3513	64.9536	0.7
6.49877	19.3405	64.9952	0.7
6.50293	19.3306	65.0368	0.7
6.50708	19.3198	65.0784	0.7
6.51124	19.3081	65.12	0.7
6.5154	19.2948	65.1615	0.7
6.51956	19.2813	65.2031	0.7
6.52372	19.2693	65.2447	0.7
6.52787	19.2608	65.2863	0.7
6.53203	19.2536	65.3279	0.7
6.53619	19.2454	65.3695	0.7
6.54035	19.2371	65.411	0.7
6.54451	19.2273	65.4526	0.7
6.54866	19.2184	65.4942	0.7
6.55282	19.2088	65.5358	0.7
6.55698	19.1994	65.5774	0.7
6.56114	19.1916	65.619	0.7
6.56529	19.1828	65.6606	0.711341
6.56945	19.1747	65.7021	0.738347
6.57361	19.1669	65.7437	0.765548
6.57777	19.1582	65.7853	0.792765
6.58193	19.1507	65.8269	0.819927
6.58608	19.1435	65.8685	0.8471
6.59024	19.1338	65.91	0.87431
6.5944	19.1245	65.9516	0.901526
6.59856	19.1165	65.9932	0.928704
6.60271	19.1072	66.0348	0.955871
6.60687	19.0974	66.0764	0.983053
6.61103	19.0858	66.118	1.01027
6.61519	19.0748	66.1595	1.03747
6.61935	19.0643	66.2011	1.06464
6.6235	19.0568	66.2427	1.09181
6.62766	19.0498	66.2843	1.11901
6.63182	19.0409	66.3259	1.14622
6.63598	19.0319	66.3675	1.17339
6.64014	19.0215	66.409	1.20057
6.64429	19.0114	66.4506	1.22777
6.64845	19.0026	66.4922	1.25499
6.65261	18.9943	66.5338	1.28217
6.65677	18.9854	66.5754	1.30934
6.66093	18.9767	66.617	1.33652
6.66508	18.9656	66.6586	1.36374
6.66924	18.956	66.7001	1.39093
6.6734	18.9465	66.7417	1.4181
6.67756	18.9379	66.7833	1.44527
6.68171	18.9293	66.8249	1.47247
6.68587	18.9197	66.8665	1.49969
6.69003	18.9103	66.9081	1.52686
6.69419	18.9026	66.9496	1.55402
6.69835	18.8933	66.9912	1.58123
6.70251	18.8828	67.0328	1.60843
6.70666	18.8738	67.0744	1.63562
6.71082	18.8649	67.116	1.66278
6.71498	18.8565	67.1576	1.68999
6.71914	18.847	67.1991	1.71721
6.72329	18.838	67.2407	1.74439
6.72745	18.8277	67.2823	1.77157
6.73161	18.8159	67.3239	1.79873
6.73577	18.8034	67.3655	1.82593
6.73993	18.7902	67.407	1.85315
6.74408	18.7769	67.4486	1.88032
6.74824	18.7644	67.4902	1.90748
6.7524	18.7519	67.5318	1.93469
6.75656	18.7367	67.5734	1.9619
6.76072	18.7236	67.615	1.98907
6.76487	18.7118	67.6566	2.01623
6.76903	18.6995	67.6981	2.04345
6.77319	18.6868	67.7397	2.07066
6.77735	18.6736	67.7813	2.09782
6.7815	18.659	67.8229	2.125
6.78566	18.6443	67.8645	2.15221
6.78982	18.6304	67.9061	2.17943
6.79398	18.6156	67.9476	2.2066
6.79814	18.6011	67.9892	2.23376
6.80229	18.5876	68.0308	2.26095
6.80645	18.5746	68.0724	2.28818
6.81061	18.5608	68.114	2.31536
6.81477	18.5463	68.1556	2.34254
6.81893	18.5311	68.1971	2.36971
6.82308	18.5167	68.2387	2.39691
6.82724	18.5015	68.2803	2.42413
6.8314	18.4859	68.3219	2.4513
6.83556	18.4717	68.3635	2.47846
6.83971	18.4575	68.4051	2.50567
6.84387	18.4429	68.4467	2.53289
6.84803	18.429	68.4882	2.56006
6.85219	18.415	68.5298	2.58722
6.85635	18.4005	68.5714	2.61441
6.8605	18.3856	68.613	2.64163
6.86466	18.3694	68.6546	2.66881
6.86882	18.3543	68.6961	2.69597
6.87298	18.3402	68.7377	2.72318
6.87714	18.3253	68.7793	2.7504
6.88129	18.3103	68.8209	2.77758
6.88545	18.297	68.8625	2.80472
6.88961	18.2844	68.9041	2.83193
6.89377	18.2715	68.9457	2.85915
6.89792	18.2603	68.9872	2.88632
6.90208	18.248	69.0288	2.91349
6.90624	18.2336	69.0704	2.94069
6.9104	18.2203	69.112	2.96791
6.91456	18.2073	69.1536	2.99509
6.91871	18.1932	69.1951	3.02225
6.92287	18.1792	69.2367	3.04945
6.92703	18.1664	69.2783	3.07667
6.93119	18.1543	69.3199	3.10383
6.93535	18.1414	69.3615	3.131
6.9395	18.1294	69.4031	3.15821
6.94366	18.119	69.4446	3.18542
6.94782	18.1075	69.4862	3.21261
6.95198	18.0954	69.5278	3.23976
6.95613	18.0838	69.5694	3.26696
6.96029	18.0724	69.611	3.29417
6.96445	18.0606	69.6526	3.32134
6.96861	18.0484	69.6941	3.34852
6.97277	18.0348	69.7357	3.37573
6.97692	18.0213	69.7773	3.40294
6.98108	18.0105	69.8189	3.43012
6.98524	18.0008	69.8605	3.4573
6.9894	17.9909	69.9021	3.48447
6.99356	17.9796	69.9437	3.5117
6.99771	17.9687	69.9852	3.53889
7.00187	17.9574	70.0268	3.56605
7.00603	17.9462	70.0684	3.59323
7.01019	17.9366	70.11	3.62045
7.01435	17.926	70.1516	3.64764
7.0185	17.9162	70.1932	3.67481
7.02266	17.9074	70.2347	3.70199
7.02682	17.8982	70.2763	3.72921
7.03098	17.8895	70.3179	3.75639
7.03514	17.8802	70.3595	3.78356
7.03929	17.8694	70.4011	3.81075
7.04345	17.8569	70.4427	3.83797
7.04761	17.8441	70.4843	3.86515
7.05177	17.8331	70.5258	3.89231
7.05592	17.8232	70.5674	3.9195
7.06008	17.8124	70.609	3.94672
7.06424	17.8023	70.6506	3.9739
7.0684	17.7932	70.6922	4.00106
7.07256	17.7835	70.7337	4.02827
7.07671	17.7734	70.7753	4.0555
7.08087	17.7637	70.8169	4.08267
7.08503	17.7537	70.8585	4.10982
7.08919	17.7422	70.9001	4.13701
7.09335	17.7297	70.9417	4.16425
7.0975	17.7183	70.9832	4.19141
7.10166	17.7068	71.0248	4.21856
7.10582	17.6945	71.0664	4.24576
7.10998	17.6828	71.108	4.273
7.11414	17.6707	71.1496	4.30018
7.11829	17.6596	71.1912	4.32733
7.12245	17.6476	71.2327	4.35453
7.12661	17.6367	71.2743	4.38175
7.13077	17.6271	71.3159	4.40892
7.13492	17.6158	71.3575	4.43608
7.13908	17.6031	71.3991	4.46329
7.14324	17.5913	71.4407	4.49051
7.1474	17.5804	71.4822	4.51769
7.15156	17.57	71.5238	4.54485
7.15571	17.5597	71.5654	4.57203
7.15987	17.5487	71.607	4.59927
7.16403	17.5408	71.6486	4.62644
7.16819	17.53	71.6902	4.6536
7.17234	17.5189	71.7318	4.6808
7.1765	17.5096	71.7733	4.70801
7.18066	17.4984	71.8149	4.73521
7.18482	17.4853	71.8565	4.76237
7.18898	17.4729	71.8981	4.78958
7.19313	17.4631	71.9397	4.81678
7.19729	17.4543	71.9813	4.84397
7.20145	17.4443	72.0228	4.87111
7.20561	17.4341	72.0644	4.89835
7.20977	17.4245	72.106	4.92553
7.21392	17.4144	72.1476	4.9527
7.21808	17.405	72.1892	4.97989
7.22224	17.3957	72.2308	5.00709
7.2264	17.3859	72.2723	5.03429
7.23056	17.3756	72.3139	5.06144
7.23471	17.3661	72.3555	5.08864
7.23887	17.3568	72.3971	5.11586
7.24303	17.3484	72.4387	5.14304
7.24719	17.3398	72.4803	5.17019
7.25134	17.3303	72.5218	5.1974
7.2555	17.3191	72.5634	5.22462
7.25966	17.3081	72.605	5.2518
7.26382	17.2971	72.6466	5.27896
7.26798	17.2844	72.6882	5.30615
7.27213	17.2736	72.7298	5.33338
7.27629	17.2626	72.7713	5.36056
7.28045	17.2522	72.8129	5.38771
7.28461	17.2435	72.8545	5.41495
7.28877	17.2357	72.8961	5.44214
7.29292	17.2266	72.9377	5.46931
7.29708	17.2162	72.9793	5.49648
7.30124	17.2055	73.0208	5.5237
7.3054	17.1954	73.0624	5.55089
7.30955	17.1859	73.104	5.57804
7.31371	17.1768	73.1456	5.60523
7.31787	17.1678	73.1872	5.63246
7.32203	17.1596	73.2288	5.65961
7.32619	17.1498	73.2703	5.68679
7.33035	17.1405	73.3119	5.71399
7.3345	17.1325	73.3535	5.74122
7.33866	17.1235	73.3951	5.7684
7.34282	17.1137	73.4367	5.79556
7.34698	17.104	73.4783	5.82279
7.35113	17.0958	73.5198	5.84998
7.35529	17.0877	73.5614	5.87716
7.35945	17.079	73.603	5.90431
7.36361	17.0698	73.6446	5.93154
7.36777	17.0608	73.6862	5.95872
7.37192	17.0505	73.7278	5.98587
7.37608	17.0411	73.7694	6.01308
7.38024	17.0324	73.8109	6.0403
7.3844	17.0216	73.8525	6.06749
7.38856	17.0115	73.8941	6.09464
7.39271	17.0019	73.9357	6.12183
7.39687	16.9915	73.9773	6.14906
7.40103	16.9803	74.0189	6.17624
7.40519	16.9692	74.0604	6.20339
7.40934	16.9591	74.102	6.23062
7.4135	16.9485	74.1436	6.25779
7.41766	16.9372	74.1852	6.28495
7.42182	16.9261	74.2268	6.31216
7.42598	16.9156	74.2683	6.33938
7.43013	16.9055	74.3099	6.36657
7.43429	16.8966	74.3515	6.39372
7.43845	16.886	74.3931	6.42091
7.44261	16.8742	74.4347	6.44813
7.44677	16.8649	74.4763	6.47532
7.45092	16.8554	74.5178	6.50247
7.45508	16.8459	74.5594	6.52971
7.45924	16.8346	74.601	6.5569
7.4634	16.8255	74.6426	6.58404
7.46755	16.8188	74.6842	6.61124
7.47171	16.8115	74.7258	6.63848
7.47587	16.8037	74.7674	6.66565
7.48003	16.7956	74.8089	6.69281
7.48419	16.788	74.8505	6.71999
7.48834	16.782	74.8921	6.74723
7.4925	16.7725	74.9337	6.77437
7.49666	16.7622	74.9753	6.80155
7.50082	16.7512	75.0169	6.8288
7.50498	16.7418	75.0584	6.85597
7.50913	16.7334	75.1	6.88311
7.51329	16.7259	75.1416	6.91032
7.51745	16.72	75.1832	6.93755
7.52161	16.7137	75.2248	6.96474
7.52576	16.709	75.2664	6.99189
7.52992	16.7031	75.308	7.01907
7.53408	16.6967	75.3495	7.04629
7.53824	16.6884	75.3911	7.0735
7.5424	16.6815	75.4327	7.10063
7.54655	16.6737	75.4743	7.12787
7.55071	16.6656	75.5159	7.15507
7.55487	16.6584	75.5574	7.1822
7.55903	16.6509	75.599	7.2094
7.56319	16.6453	75.6406	7.23662
7.56734	16.639	75.6822	7.2638
7.5715	16.6282	75.7238	7.29097
7.57566	16.6195	75.7654	7.3182
7.57982	16.6109	75.807	7.34539
7.58397	16.6014	75.8485	7.37254
7.58813	16.5916	75.8901	7.39972
7.59229	16.5816	75.9317	7.42695
7.59645	16.5731	75.9733	7.45413
7.60061	16.5664	76.0149	7.48128
7.60477	16.5615	76.0564	7.50848
7.60892	16.5535	76.098	7.53571
7.61308	16.5449	76.1396	7.56289
7.61724	16.534	76.1812	7.59006
7.6214	16.5217	76.2228	7.61728
7.62555	16.5106	76.2644	7.64447
7.62971	16.4983	76.3059	7.67162
7.63387	16.4885	76.3475	7.69881
7.63803	16.4798	76.3891	7.72604
7.64219	16.4715	76.4307	7.75322
7.64634	16.461	76.4723	7.78036
7.6505	16.454	76.5139	7.80761
7.65466	16.445	76.5554	7.83478
7.65882	16.4339	76.597	7.86193
7.66298	16.4243	76.6386	7.88915
7.66713	16.4151	76.6802	7.91636
7.67129	16.4045	76.7218	7.94354
7.67545	16.3967	76.7634	7.9707
7.67961	16.3874	76.805	7.99793
7.68376	16.3769	76.8465	8.02512
7.68792	16.3676	76.8881	8.05228
7.69208	16.3587	76.9297	8.07945
7.69624	16.351	76.9713	8.10669
7.7004	16.3448	77.0129	8.13388
7.70455	16.3361	77.0545	8.16102
7.70871	16.3264	77.096	8.18825
7.71287	16.3201	77.1376	8.21546
7.71703	16.3122	77.1792	8.24258
7.72119	16.3043	77.2208	8.26978
7.72534	16.2986	77.2624	8.297
7.7295	16.294	77.304	8.32419
7.73366	16.2889	77.3455	8.35136
7.73782	16.2819	77.3871	8.37857
7.74198	16.2741	77.4287	8.40577
7.74613	16.2678	77.4703	8.43292
7.75029	16.2614	77.5119	8.46011
7.75445	16.2537	77.5535	8.48734
7.75861	16.2488	77.595	8.51452
7.76276	16.246	77.6366	8.54167
7.76692	16.2426	77.6782	8.5689
7.77108	16.2365	77.7198	8.59604
7.77524	16.2331	77.7614	8.62323
7.7794	16.2262	77.803	8.65043
7.78355	16.2203	77.8445	8.67765
7.78771	16.2169	77.8861	8.70484
7.79187	16.2125	77.9277	8.732
7.79603	16.2069	77.9693	8.75924
7.80018	16.1989	78.0109	8.78642
7.80434	16.1918	78.0525	8.81357
7.8085	16.1858	78.094	8.84076
7.81266	16.1828	78.1356	8.86798
7.81682	16.1751	78.1772	8.89516
7.82097	16.1679	78.2188	8.92232
7.82513	16.1623	78.2604	8.94956
7.82929	16.1556	78.302	8.97674
7.83345	16.1476	78.3435	9.00388
7.83761	16.1428	78.3851	9.03112
7.84176	16.1346	78.4267	9.05831
7.84592	16.1278	78.4683	9.08546
7.85008	16.12	78.5099	9.11265
7.85424	16.1116	78.5515	9.13989
7.8584	16.1046	78.5931	9.16706
7.86255	16.0949	78.6346	9.19422
7.86671	16.0857	78.6762	9.22144
7.87087	16.0751	78.7178	9.24863
7.87503	16.0662	78.7594	9.27579
7.87918	16.0545	78.801	9.30297
7.88334	16.047	78.8426	9.3302
7.8875	16.0392	78.8841	9.3574
7.89166	16.0295	78.9257	9.38454
7.89582	16.0201	78.9673	9.41177
7.89997	16.012	79.0089	9.43895
7.90413	16.0041	79.0505	9.4661
7.90829	15.9948	79.0921	9.49334
7.91245	15.9861	79.1336	9.52053
7.91661	15.9735	79.1752	9.54767
7.92076	15.9642	79.2168	9.57487
7.92492	15.9564	79.2584	9.60208
7.92908	15.9481	79.3	9.62928
7.93324	15.9368	79.3415	9.65645
7.9374	15.9258	79.3831	9.68367
7.94155	15.9137	79.4247	9.71085
7.94571	15.9026	79.4663	9.73798
7.94987	15.8907	79.5079	9.76522
7.95403	15.8814	79.5495	9.79242
7.95819	15.8729	79.5911	9.81958
7.96234	15.8616	79.6326	9.84676
7.9665	15.8528	79.6742	9.87398
7.97066	15.845	79.7158	9.90118
7.97482	15.8361	79.7574	9.92832
7.97897	15.829	79.799	9.95554
7.98313	15.8236	79.8406	9.98273
7.98729	15.8133	79.8821	10.0099
7.99145	15.8036	79.9237	10.0371
7.99561	15.7968	79.9653	10.0643
7.99976	15.7868	80.0069	10.0914
8.00392	15.7792	80.0485	10.1186
8.00808	15.7701	80.0901	10.1459
8.01224	15.7617	80.1316	10.1731
8.01639	15.7514	80.1732	10.2002
8.02055	15.7427	80.2148	10.2274
8.02471	15.7375	80.2564	10.2546
8.02887	15.7281	80.298	10.2818
8.03303	15.7183	80.3396	10.309
8.03718	15.7098	80.3811	10.3362
8.04134	15.7006	80.4227	10.3634
8.0455	15.6901	80.4643	10.3905
8.04966	15.6832	80.5059	10.4178
8.05382	15.6741	80.5475	10.445
8.05797	15.6652	80.5891	10.4721
8.06213	15.6588	80.6307	10.4993
8.06629	15.6523	80.6722	10.5265
8.07045	15.6452	80.7138	10.5537
8.07461	15.637	80.7554	10.5809
8.07876	15.6296	80.797	10.6081
8.08292	15.6215	80.8386	10.6352
8.08708	15.6121	80.8802	10.6624
8.09124	15.606	80.9217	10.6897
8.09539	15.5984	80.9633	10.7169
8.09955	15.5891	81.0049	10.744
8.10371	15.5843	81.0465	10.7712
8.10787	15.5756	81.0881	10.7984
8.11203	15.5677	81.1296	10.8256
8.11618	15.5588	81.1712	10.8528
8.12034	15.5513	81.2128	10.88
8.1245	15.5441	81.2544	10.9072
8.12866	15.5353	81.296	10.9344
8.13282	15.5295	81.3376	10.9616
8.13697	15.5232	81.3791	10.9887
8.14113	15.5174	81.4207	11.0159
8.14529	15.5109	81.4623	11.0431
8.14945	15.5055	81.5039	11.0703
8.15361	15.4995	81.5455	11.0975
8.15776	15.4963	81.5871	11.1247
8.16192	15.4895	81.6286	11.1519
8.16608	15.4812	81.6702	11.179
8.17024	15.4726	81.7118	11.2063
8.1744	15.4651	81.7534	11.2334
8.17855	15.4586	81.795	11.2606
8.18271	15.452	81.8366	11.2878
8.18687	15.4439	81.8782	11.315
8.19103	15.4371	81.9197	11.3422
8.19518	15.4313	81.9613	11.3694
8.19934	15.4271	82.0029	11.3966
8.2035	15.4211	82.0445	11.4237
8.20766	15.4134	82.0861	11.4509
8.21182	15.4065	82.1277	11.4782
8.21597	15.4007	82.1692	11.5053
8.22013	15.3954	82.2108	11.5325
8.22429	15.3916	82.2524	11.5597
8.22845	15.3838	82.294	11.5869
8.2326	15.3759	82.3356	11.6141
8.23676	15.3675	82.3772	11.6413
8.24092	15.3597	82.4187	11.6685
8.24508	15.3523	82.4603	11.6956
8.24924	15.3458	82.5019	11.7228
8.25339	15.3357	82.5435	11.75
8.25755	15.3252	82.5851	11.7772
8.26171	15.3158	82.6267	11.8044
8.26587	15.308	82.6682	11.8316
8.27003	15.2989	82.7098	11.8588
8.27418	15.2909	82.7514	11.886
8.27834	15.2847	82.793	11.9132
8.2825	15.2774	82.8346	11.9404
8.28666	15.2693	82.8762	11.9675
8.29082	15.2621	82.9177	11.9947
8.29497	15.253	82.9593	12.0219
8.29913	15.2451	83.0009	12.0491
8.30329	15.235	83.0425	12.0763
8.30745	15.2267	83.0841	12.1035
[truncated: 41,170 more rows]

## Sheet: S5b
Volume (mL)	Abs 280 nm (mAU)	Volume (mL)	%B
0	6.19709	0	0
0.009	80.4121	0.005	0
0.017	80.5418	0.011	0
0.026	80.5582	0.016	0
0.034	80.5746	0.021	0
0.043	82.4593	0.027	0
0.051	84.9968	0.032	0
0.06	87.5342	0.037	0
0.068	90.0717	0.043	0
0.077	92.4445	0.048	0
0.086	85.9987	0.053	0
0.094	79.553	0.059	0
0.103	73.1073	0.064	0
0.111	66.6616	0.069	0
0.12	60.2158	0.075	0
0.128	53.7701	0.08	0
0.137	48.0874	0.086	0
0.145	42.5527	0.091	0
0.154	37.018	0.096	0
0.162	31.4834	0.102	0
0.171	25.9487	0.107	0
0.18	20.4141	0.112	0
0.188	18.1163	0.118	0
0.197	17.9498	0.123	0
0.205	17.7832	0.128	0
0.214	17.6167	0.134	0
0.222	17.4502	0.139	0
0.231	17.2837	0.144	0
0.239	17.2389	0.15	0
0.248	17.4027	0.155	0
0.257	17.5665	0.16	0
0.265	17.7303	0.166	0
0.274	17.894	0.171	0
0.282	18.0578	0.176	0
0.291	18.2302	0.182	0
0.299	18.4588	0.187	0
0.308	18.6874	0.192	0
0.316	18.916	0.198	0
0.325	19.1447	0.203	0
0.334	19.3733	0.208	0
0.342	19.6019	0.214	0
0.351	19.5804	0.219	0
0.359	19.5305	0.224	0
0.368	19.4807	0.23	0
0.376	19.4308	0.235	0
0.385	19.3809	0.241	0
0.393	19.331	0.246	0
0.402	19.3187	0.251	0
0.411	19.3255	0.257	0
0.419	19.3322	0.262	0
0.428	19.339	0.267	0
0.436	19.3457	0.273	0
0.445	19.3525	0.278	0
0.453	19.4532	0.283	0
0.462	19.6789	0.289	0
0.47	19.9046	0.294	0
0.479	20.1303	0.299	0
0.487	20.3559	0.305	0
0.496	20.5816	0.31	0
0.505	20.8402	0.315	0
0.513	21.2336	0.321	0
0.522	21.627	0.326	0
0.53	22.0203	0.331	0
0.539	22.4137	0.337	0
0.547	22.8071	0.342	0
0.556	23.2004	0.347	0
0.564	23.5676	0.353	0
0.573	23.9338	0.358	0
0.582	24.2999	0.363	0
0.59	24.666	0.369	0
0.599	25.0322	0.374	0
0.607	25.3983	0.379	0
0.616	25.5367	0.385	0
0.624	25.5887	0.39	0
0.633	25.6407	0.396	0
0.641	25.6927	0.401	0
0.65	25.7447	0.406	0
0.659	25.7967	0.412	0
0.667	25.7677	0.417	0
0.676	25.6551	0.422	0
0.684	25.5426	0.428	0
0.693	25.43	0.433	0
0.701	25.3175	0.438	0
0.71	25.2049	0.444	0
0.718	25.0967	0.449	0
0.727	25.0011	0.454	0
0.735	24.9055	0.46	0
0.744	24.8099	0.465	0
0.753	24.7143	0.47	0
0.761	24.6187	0.476	0
0.77	24.5234	0.481	0
0.778	24.442	0.486	0
0.787	24.3607	0.492	0
0.795	24.2793	0.497	0
0.804	24.198	0.502	0
0.812	24.1166	0.508	0
0.821	24.0353	0.513	0
0.83	23.9824	0.518	0
0.838	23.9371	0.524	0
0.847	23.8919	0.529	0
0.855	23.8466	0.534	0
0.864	23.8013	0.54	0
0.872	23.7561	0.545	0
0.881	23.7107	0.551	0
0.889	23.6651	0.556	0
0.898	23.6196	0.561	0
0.907	23.574	0.567	0
0.915	23.5285	0.572	0
0.924	23.483	0.577	0
0.932	23.4387	0.583	0
0.941	23.3972	0.588	0
0.949	23.3556	0.593	0
0.958	23.3141	0.599	0
0.966	23.2725	0.604	0
0.975	23.2309	0.609	0
0.984	23.1857	0.615	0
0.992	23.1012	0.62	0
1.001	23.0167	0.625	0
1.009	22.9322	0.631	0
1.018	22.8477	0.636	0
1.026	22.7632	0.641	0
1.035	22.6788	0.647	0
1.043	22.61	0.652	0
1.052	22.544	0.657	0
1.06	22.478	0.663	0
1.069	22.412	0.668	0
1.078	22.346	0.673	0
1.086	22.28	0.679	0
1.095	22.2016	0.684	0
1.103	22.1154	0.689	0
1.112	22.0292	0.695	0
1.12	21.943	0.7	0
1.129	21.8568	0.706	0
1.137	21.7706	0.711	0
1.146	21.6869	0.716	0
1.155	21.607	0.722	0
1.163	21.5271	0.727	0
1.172	21.4472	0.732	0
1.18	21.3673	0.738	0
1.189	21.2875	0.743	0
1.197	21.2044	0.748	0
1.206	21.1028	0.754	0
1.214	21.0013	0.759	0
1.223	20.8997	0.764	0
1.232	20.7982	0.77	0
1.24	20.6966	0.775	0
1.249	20.5951	0.78	0
1.257	20.5186	0.786	0
1.266	20.4444	0.791	0
1.274	20.3703	0.796	0
1.283	20.2961	0.802	0
1.291	20.2219	0.807	0
1.3	20.1478	0.812	0
1.308	20.0612	0.818	0
1.317	19.9686	0.823	0
1.326	19.8761	0.828	0
1.334	19.7836	0.834	0
1.343	19.6911	0.839	0
1.351	19.5986	0.844	0
1.36	19.5225	0.85	0
1.368	19.4672	0.855	0
1.377	19.4118	0.861	0
1.385	19.3564	0.866	0
1.394	19.3011	0.871	0
1.403	19.2457	0.877	0
1.411	19.1869	0.882	0
1.42	19.115	0.887	0
1.428	19.0432	0.893	0
1.437	18.9714	0.898	0
1.445	18.8995	0.903	0
1.454	18.8277	0.909	0
1.462	18.7558	0.914	0
1.471	18.6977	0.919	0
1.48	18.64	0.925	0
1.488	18.5823	0.93	0
1.497	18.5246	0.935	0
1.505	18.4669	0.941	0
1.514	18.4092	0.946	0
1.522	18.3387	0.951	0
1.531	18.2638	0.957	0
1.539	18.1889	0.962	0
1.548	18.114	0.967	0
1.557	18.0391	0.973	0
1.565	17.9642	0.978	0
1.574	17.9027	0.983	0
1.582	17.8542	0.989	0
1.591	17.8058	0.994	0
1.599	17.7574	0.999	0
1.608	17.7089	1.005	0
1.616	17.6605	1.01	0
1.625	17.6128	1.016	0
1.633	17.5673	1.021	0
1.642	17.5217	1.026	0
1.651	17.4761	1.032	0
1.659	17.4305	1.037	0
1.668	17.3849	1.042	0
1.676	17.34	1.048	0
1.685	17.3115	1.053	0
1.693	17.283	1.058	0
1.702	17.2546	1.064	0
1.71	17.2261	1.069	0
1.719	17.1976	1.074	0
1.728	17.1691	1.08	0
1.736	17.1395	1.085	0
1.745	17.1095	1.09	0
1.753	17.0795	1.096	0
1.762	17.0495	1.101	0
1.77	17.0196	1.106	0
1.779	16.9896	1.112	0
1.787	16.9644	1.117	0
1.796	16.9429	1.122	0
1.805	16.9214	1.128	0
1.813	16.8999	1.133	0
1.822	16.8783	1.138	0
1.83	16.8568	1.144	0
1.839	16.8253	1.149	0
1.847	16.7739	1.154	0
1.856	16.7226	1.16	0
1.864	16.6712	1.165	0
1.873	16.6198	1.171	0
1.882	16.5685	1.176	0
1.89	16.5177	1.181	0
1.899	16.4728	1.187	0
1.907	16.4278	1.192	0
1.916	16.3828	1.197	0
1.924	16.3379	1.203	0
1.933	16.2929	1.208	0
1.941	16.2479	1.213	0
1.95	16.1842	1.219	0
1.958	16.1175	1.224	0
1.967	16.0508	1.229	0
1.976	15.984	1.235	0
1.984	15.9174	1.24	0
1.993	15.8506	1.245	0
2.001	15.8148	1.251	0
2.01	15.7971	1.256	0
2.018	15.7792	1.261	0
2.027	15.7614	1.267	0
2.035	15.7436	1.272	0
2.044	15.7258	1.277	0
2.053	15.6996	1.283	0
2.061	15.6606	1.288	0
2.07	15.6215	1.293	0
2.078	15.5825	1.299	0
2.087	15.5434	1.304	0
2.095	15.5044	1.309	0
2.104	15.4696	1.315	0
2.112	15.4566	1.32	0
2.121	15.4437	1.326	0
2.13	15.4307	1.331	0
2.138	15.4178	1.336	0
2.147	15.4048	1.342	0
2.155	15.3919	1.347	0
2.164	15.3584	1.352	0
2.172	15.3234	1.358	0
2.181	15.2883	1.363	0
2.189	15.2532	1.368	0
2.198	15.2182	1.374	0
2.206	15.1831	1.379	0
2.215	15.1539	1.384	0
2.224	15.1274	1.39	0
2.232	15.1008	1.395	0
2.241	15.0742	1.4	0
2.249	15.0477	1.406	0
2.258	15.0211	1.411	0
2.266	14.9929	1.416	0
2.275	14.9627	1.422	0
2.283	14.9326	1.427	0
2.292	14.9024	1.432	0
2.301	14.8722	1.438	0
2.309	14.842	1.443	0
2.318	14.8156	1.448	0
2.326	14.8021	1.454	0
2.335	14.7887	1.459	0
2.343	14.7752	1.464	0
2.352	14.7618	1.47	0
2.36	14.7483	1.475	0
2.369	14.7349	1.481	0
2.378	14.7149	1.486	0
2.386	14.695	1.491	0
2.395	14.675	1.497	0
2.403	14.655	1.502	0
2.412	14.635	1.507	0
2.42	14.615	1.513	0
2.429	14.5927	1.518	0
2.437	14.5697	1.523	0
2.446	14.5467	1.529	0
2.455	14.5237	1.534	0
2.463	14.5007	1.539	0
2.472	14.4777	1.545	0
2.48	14.4332	1.55	0
2.489	14.3691	1.555	0
2.497	14.305	1.561	0
2.506	14.2409	1.566	0
2.514	14.1768	1.571	0
2.523	14.1127	1.577	0
2.531	14.069	1.582	0
2.54	14.0762	1.587	0
2.549	14.0834	1.593	0
2.557	14.0906	1.598	0
2.566	14.0977	1.603	0
2.574	14.1049	1.609	0
2.583	14.1106	1.614	0
2.591	14.0899	1.619	0
2.6	14.0692	1.625	0
2.608	14.0484	1.63	0
2.617	14.0276	1.636	0
2.626	14.0069	1.641	0
2.634	13.9861	1.646	0
2.643	13.982	1.652	0
2.651	13.9817	1.657	0
2.66	13.9813	1.662	0
2.668	13.9809	1.668	0
2.677	13.9805	1.673	0
2.685	13.9802	1.678	0
2.694	13.9554	1.684	0
2.703	13.9132	1.689	0
2.711	13.8711	1.694	0
2.72	13.8289	1.7	0
2.728	13.7867	1.705	0
2.737	13.7445	1.71	0
2.745	13.7154	1.716	0
2.754	13.7106	1.721	0
2.762	13.7058	1.726	0
2.771	13.701	1.732	0
2.779	13.6962	1.737	0
2.788	13.6913	1.742	0
2.797	13.6847	1.748	0
2.805	13.6644	1.753	0
2.814	13.644	1.758	0
2.822	13.6236	1.764	0
2.831	13.6033	1.769	0
2.839	13.5829	1.774	0
2.848	13.5625	1.78	0
2.856	13.5485	1.785	0
2.865	13.5354	1.791	0
2.874	13.5223	1.796	0
2.882	13.5092	1.801	0
2.891	13.4961	1.807	0
2.899	13.483	1.812	0
2.908	13.4464	1.817	0
2.916	13.3971	1.823	0
2.925	13.3477	1.828	0
2.933	13.2983	1.833	0
2.942	13.2489	1.839	0
2.951	13.1996	1.844	0
2.959	13.1754	1.849	0
2.968	13.1874	1.855	0
2.976	13.1993	1.86	0
2.985	13.2113	1.865	0
2.993	13.2233	1.871	0
3.002	13.2353	1.876	0
3.01	13.2424	1.881	0
3.019	13.2268	1.887	0
3.028	13.2112	1.892	0
3.036	13.1956	1.897	0
3.045	13.18	1.903	0
3.053	13.1645	1.908	0
3.062	13.1489	1.913	0
3.07	13.1349	1.919	0
3.079	13.1211	1.924	0
3.087	13.1072	1.929	0
3.096	13.0934	1.935	0
3.104	13.0795	1.94	0
3.113	13.0657	1.946	0
3.122	13.0386	1.951	0
3.13	13.006	1.956	0
3.139	12.9734	1.962	0
3.147	12.9408	1.967	0
3.156	12.9082	1.972	0
3.164	12.8756	1.978	0
3.173	12.8511	1.983	0
3.181	12.8356	1.988	0
3.19	12.8201	1.994	0
3.199	12.8046	1.999	0
3.207	12.7891	2.004	0
3.216	12.7736	2.01	0
3.224	12.7582	2.015	0
3.233	12.7432	2.02	0
3.241	12.7283	2.026	0
3.25	12.7134	2.031	0
3.258	12.6984	2.036	0
3.267	12.6835	2.042	0
3.276	12.6686	2.047	0
3.284	12.6678	2.052	0
3.293	12.6669	2.058	0
3.301	12.6661	2.063	0
3.31	12.6653	2.068	0
3.318	12.6645	2.074	0
3.327	12.6636	2.079	0
3.335	12.6483	2.084	0
3.344	12.6287	2.09	0
3.352	12.609	2.095	0
3.361	12.5894	2.101	0
3.37	12.5697	2.106	0
3.378	12.5501	2.111	0
3.387	12.5454	2.117	0
3.395	12.5537	2.122	0
3.404	12.5621	2.127	0
3.412	12.5704	2.133	0
3.421	12.5788	2.138	0
3.429	12.5871	2.143	0
3.438	12.5904	2.149	0
3.447	12.582	2.154	0
3.455	12.5737	2.159	0
3.464	12.5653	2.165	0
3.472	12.5569	2.17	0
3.481	12.5485	2.175	0
3.489	12.5412	2.181	0
3.498	12.5485	2.186	0
3.506	12.5559	2.191	0
3.515	12.5632	2.197	0
3.524	12.5705	2.202	0
3.532	12.5778	2.207	0
3.541	12.5852	2.213	0
3.549	12.5707	2.218	0
3.558	12.5519	2.223	0
3.566	12.5331	2.229	0
3.575	12.5144	2.234	0
3.583	12.4956	2.239	0
3.592	12.4768	2.245	0
3.601	12.4727	2.25	0
3.609	12.4785	2.255	0
3.618	12.4844	2.261	0
3.626	12.4902	2.266	0
3.635	12.496	2.272	0
3.643	12.5019	2.277	0
3.652	12.5056	2.282	0
3.66	12.5056	2.288	0
3.669	12.5056	2.293	0
3.677	12.5056	2.298	0
3.686	12.5056	2.304	0
3.695	12.5056	2.309	0
3.703	12.5033	2.314	0
3.712	12.4853	2.32	0
3.72	12.4673	2.325	0
3.729	12.4493	2.33	0
3.737	12.4313	2.336	0
3.746	12.4132	2.341	0
3.754	12.3952	2.346	0
3.763	12.3821	2.352	0
3.772	12.3695	2.357	0
3.78	12.357	2.362	0
3.789	12.3444	2.368	0
3.797	12.3318	2.373	0
3.806	12.3193	2.378	0
3.814	12.3088	2.384	0
3.823	12.2994	2.389	0
3.831	12.29	2.394	0
3.84	12.2806	2.4	0
3.849	12.2712	2.405	0
3.857	12.2617	2.41	0
3.866	12.2542	2.416	0
3.874	12.2491	2.421	0
3.883	12.244	2.427	0
3.891	12.239	2.432	0
3.9	12.2339	2.437	0
3.908	12.2289	2.443	0
3.917	12.2264	2.448	0
3.925	12.2348	2.453	0
3.934	12.2432	2.459	0
3.943	12.2515	2.464	0
3.951	12.2599	2.469	0
3.96	12.2683	2.475	0
3.968	12.2767	2.48	0
3.977	12.2736	2.485	0
3.985	12.2701	2.491	0
3.994	12.2666	2.496	0
4.002	12.263	2.501	0
4.011	12.2595	2.507	0
4.02	12.256	2.512	0
4.028	12.2643	2.517	0
4.037	12.2773	2.523	0
4.045	12.2903	2.528	0
4.054	12.3032	2.533	0
4.062	12.3162	2.539	0
4.071	12.3291	2.544	0
4.079	12.3335	2.549	0
4.088	12.329	2.555	0
4.097	12.3245	2.56	0
4.105	12.32	2.565	0
4.114	12.3155	2.571	0
4.122	12.311	2.576	0
4.131	12.3022	2.582	0
4.139	12.281	2.587	0
4.148	12.2598	2.592	0
4.156	12.2386	2.598	0
4.165	12.2174	2.603	0
4.174	12.1962	2.608	0
4.182	12.1746	2.614	0
4.191	12.1373	2.619	0
4.199	12.1	2.624	0
4.208	12.0627	2.63	0
4.216	12.0254	2.635	0
4.225	11.9881	2.64	0
4.233	11.9509	2.646	0
4.242	11.9261	2.651	0
4.25	11.9049	2.656	0
4.259	11.8836	2.662	0
4.268	11.8623	2.667	0
4.276	11.8411	2.672	0
4.285	11.8198	2.678	0
4.293	11.8072	2.683	0
4.302	11.8016	2.688	0
4.31	11.796	2.694	0
4.319	11.7904	2.699	0
4.327	11.7848	2.704	0
4.336	11.7792	2.71	0
4.345	11.7748	2.715	0
4.353	11.7729	2.72	0
4.362	11.771	2.726	0
4.37	11.7691	2.731	0
4.379	11.7672	2.737	0
4.387	11.7653	2.742	0
4.396	11.762	2.747	0
4.404	11.7431	2.753	0
4.413	11.7242	2.758	0
4.422	11.7053	2.763	0
4.43	11.6864	2.769	0
4.439	11.6675	2.774	0
4.447	11.6486	2.779	0
4.456	11.6329	2.785	0
4.464	11.6179	2.79	0
4.473	11.6028	2.795	0
4.481	11.5878	2.801	0
4.49	11.5727	2.806	0
4.499	11.5576	2.811	0
4.507	11.5483	2.817	0
4.516	11.5425	2.822	0
4.524	11.5367	2.827	0
4.533	11.531	2.833	0
4.541	11.5252	2.838	0
4.55	11.5194	2.843	0
4.558	11.5125	2.849	0
4.567	11.5036	2.854	0
4.575	11.4946	2.859	0
4.584	11.4857	2.865	0
4.593	11.4768	2.87	0
4.601	11.4679	2.875	0
4.61	11.4601	2.881	0
4.618	11.4591	2.886	0
4.627	11.4581	2.892	0
4.635	11.4571	2.897	0
4.644	11.4561	2.902	0
4.652	11.4551	2.908	0
4.661	11.4541	2.913	0
4.67	11.4566	2.918	0
4.678	11.4595	2.924	0
4.687	11.4624	2.929	0
4.695	11.4652	2.934	0
4.704	11.4681	2.94	0
4.712	11.471	2.945	0
4.721	11.4664	2.95	0
4.729	11.4581	2.956	0
4.738	11.4499	2.961	0
4.747	11.4417	2.966	0
4.755	11.4335	2.972	0
4.764	11.4253	2.977	0
4.772	11.4253	2.982	0
4.781	11.4357	2.988	0
4.789	11.4461	2.993	0
4.798	11.4565	2.998	0
4.806	11.4669	3.004	0
4.815	11.4773	3.009	0
4.823	11.4813	3.014	0
4.832	11.4607	3.02	0
4.841	11.44	3.025	0
4.849	11.4194	3.03	0
4.858	11.3987	3.036	0
4.866	11.3781	3.041	0
4.875	11.3574	3.047	0
4.883	11.3514	3.052	0
4.892	11.3458	3.057	0
4.9	11.3402	3.063	0
4.909	11.3346	3.068	0
4.918	11.329	3.073	0
4.926	11.3235	3.079	0
4.935	11.3265	3.084	0
4.943	11.3327	3.089	0
4.952	11.3389	3.095	0
4.96	11.3451	3.1	0
4.969	11.3512	3.105	0
4.977	11.3574	3.111	0
4.986	11.3559	3.116	0
4.995	11.347	3.121	0
5.003	11.338	3.127	0
5.012	11.329	3.132	0
5.02	11.3201	3.137	0
5.029	11.3111	3.143	0
5.037	11.3002	3.148	0
5.046	11.2842	3.153	0
5.054	11.2682	3.159	0
5.063	11.2521	3.164	0
5.072	11.2361	3.169	0
5.08	11.22	3.175	0
5.089	11.2045	3.18	0
5.097	11.2046	3.185	0
5.106	11.2046	3.191	0
5.114	11.2047	3.196	0
5.123	11.2047	3.202	0
5.131	11.2048	3.207	0
5.14	11.2049	3.212	0
5.148	11.2128	3.218	0
5.157	11.2227	3.223	0
5.166	11.2326	3.228	0
5.174	11.2425	3.234	0
5.183	11.2524	3.239	0
5.191	11.2623	3.244	0
5.2	11.2631	3.25	0
5.208	11.2569	3.255	0
5.217	11.2507	3.26	0
5.225	11.2445	3.266	0
5.234	11.2383	3.271	0
5.243	11.2321	3.276	0
5.251	11.2218	3.282	0
5.26	11.2031	3.287	0
5.268	11.1843	3.292	0
5.277	11.1656	3.298	0
5.285	11.1469	3.303	0
5.294	11.1282	3.308	0
5.302	11.1117	3.314	0
5.311	11.1164	3.319	0
5.32	11.121	3.324	0
5.328	11.1257	3.33	0
5.337	11.1304	3.335	0
5.345	11.135	3.34	0
5.354	11.1397	3.346	0
5.362	11.1285	3.351	0
5.371	11.1146	3.357	0
5.379	11.1008	3.362	0
5.388	11.087	3.367	0
5.396	11.0732	3.373	0
5.405	11.0594	3.378	0
5.414	11.0561	3.383	0
5.422	11.059	3.389	0
5.431	11.0618	3.394	0
5.439	11.0647	3.399	0
5.448	11.0675	3.405	0
5.456	11.0704	3.41	0
5.465	11.067	3.415	0
5.473	11.0539	3.421	0
5.482	11.0407	3.426	0
5.491	11.0276	3.431	0
5.499	11.0145	3.437	0
5.508	11.0014	3.442	0
5.516	10.991	3.447	0
5.525	10.995	3.453	0
5.533	10.9991	3.458	0
5.542	11.0031	3.463	0
5.55	11.0071	3.469	0
5.559	11.0111	3.474	0
5.568	11.0152	3.479	0
5.576	11.0167	3.485	0
5.585	11.018	3.49	0
5.593	11.0194	3.495	0
5.602	11.0207	3.501	0
5.61	11.0221	3.506	0
5.619	11.0234	3.512	0
5.627	11.0155	3.517	0
5.636	11.0034	3.522	0
5.645	10.9914	3.528	0
5.653	10.9793	3.533	0
5.662	10.9672	3.538	0
5.67	10.9552	3.544	0
5.679	10.9437	3.549	0
5.687	10.9331	3.554	0
5.696	10.9225	3.56	0
5.704	10.9118	3.565	0
5.713	10.9012	3.57	0
5.721	10.8905	3.576	0
5.73	10.8821	3.581	0
5.739	10.8812	3.586	0
5.747	10.8804	3.592	0
5.756	10.8796	3.597	0
5.764	10.8787	3.602	0
5.773	10.8779	3.608	0
5.781	10.877	3.613	0
5.79	10.8708	3.618	0
5.798	10.8644	3.624	0
5.807	10.8581	3.629	0
5.816	10.8518	3.634	0
5.824	10.8454	3.64	0
5.833	10.8391	3.645	0
5.841	10.8241	3.65	0
5.85	10.8063	3.656	0
5.858	10.7885	3.661	0
5.867	10.7707	3.667	0
5.875	10.7529	3.672	0
5.884	10.735	3.677	0
5.893	10.723	3.683	0
5.901	10.7165	3.688	0
5.91	10.7099	3.693	0
5.918	10.7034	3.699	0
5.927	10.6969	3.704	0
5.935	10.6903	3.709	0
5.944	10.687	3.715	0
5.952	10.692	3.72	0
5.961	10.6969	3.725	0
5.969	10.7019	3.731	0
5.978	10.7069	3.736	0
5.987	10.7118	3.741	0
5.995	10.7159	3.747	0
6.004	10.7022	3.752	0
6.012	10.6885	3.757	0
6.021	10.6748	3.763	0
6.029	10.6611	3.768	0
6.038	10.6474	3.773	0
6.046	10.6337	3.779	0
6.055	10.6354	3.784	0
6.064	10.6405	3.789	0
6.072	10.6457	3.795	0
6.081	10.6508	3.8	0
6.089	10.656	3.805	0
6.098	10.6611	3.811	0
6.106	10.6607	3.816	0
6.115	10.6561	3.822	0
6.123	10.6516	3.827	0
6.132	10.647	3.832	0
6.141	10.6424	3.838	0
6.149	10.6379	3.843	0
6.158	10.632	3.848	0
6.166	10.6238	3.854	0
6.175	10.6155	3.859	0
6.183	10.6072	3.864	0
6.192	10.599	3.87	0
6.2	10.5907	3.875	0
6.209	10.5811	3.88	0
6.218	10.5614	3.886	0
6.226	10.5418	3.891	0
6.235	10.5221	3.896	0
6.243	10.5024	3.902	0
6.252	10.4827	3.907	0
6.26	10.4631	3.912	0
6.269	10.4613	3.918	0
6.277	10.4619	3.923	0
6.286	10.4626	3.928	0
6.294	10.4632	3.934	0
6.303	10.4638	3.939	0
6.312	10.4644	3.944	0
6.32	10.46	3.95	0
6.329	10.4528	3.955	0
6.337	10.4456	3.96	0
6.346	10.4384	3.966	0
6.354	10.4313	3.971	0
6.363	10.4241	3.977	0
6.371	10.4192	3.982	0
6.38	10.4175	3.987	0
6.389	10.4158	3.993	0
6.397	10.4141	3.998	0
6.406	10.4124	4.003	0
6.414	10.4108	4.009	0
6.423	10.4095	4.014	0
6.431	10.4102	4.019	0
6.44	10.411	4.025	0
6.448	10.4117	4.03	0
6.457	10.4125	4.035	0
6.466	10.4132	4.041	0
6.474	10.414	4.046	0
6.483	10.409	4.051	0
6.491	10.4037	4.057	0
6.5	10.3984	4.062	0
6.508	10.3931	4.067	0
6.517	10.3878	4.073	0
6.525	10.3824	4.078	0
6.534	10.3676	4.083	0
6.542	10.349	4.089	0
6.551	10.3304	4.094	0
6.56	10.3118	4.099	0
6.568	10.2932	4.105	0
6.577	10.2746	4.11	0
6.585	10.2652	4.115	0
6.594	10.266	4.121	0
6.602	10.2667	4.126	0
6.611	10.2675	4.132	0
6.619	10.2682	4.137	0
6.628	10.269	4.142	0
6.637	10.2695	4.148	0
6.645	10.2691	4.153	0
6.654	10.2687	4.158	0
6.662	10.2683	4.164	0
6.671	10.2679	4.169	0
6.679	10.2675	4.174	0
6.688	10.267	4.18	0
6.696	10.2551	4.185	0
6.705	10.2432	4.19	0
6.714	10.2313	4.196	0
6.722	10.2194	4.201	0
6.731	10.2075	4.206	0
6.739	10.1956	4.212	0
6.748	10.1905	4.217	0
6.756	10.1874	4.222	0
6.765	10.1842	4.228	0
6.773	10.1811	4.233	0
6.782	10.178	4.238	0
6.791	10.1748	4.244	0
6.799	10.167	4.249	0
6.808	10.1552	4.254	0
6.816	10.1434	4.26	0
6.825	10.1315	4.265	0
6.833	10.1197	4.27	0
6.842	10.1079	4.276	0
6.85	10.0928	4.281	0
6.859	10.07	4.287	0
6.867	10.0473	4.292	0
6.876	10.0246	4.297	0
6.885	10.0018	4.303	0
6.893	9.97912	4.308	0
6.902	9.95646	4.313	0
6.91	9.93456	4.319	0
6.919	9.91267	4.324	0
6.927	9.89078	4.329	0
6.936	9.86889	4.335	0
6.944	9.847	4.34	0
6.953	9.82511	4.345	0
6.962	9.8182	4.351	0
6.97	9.8142	4.356	0
6.979	9.8102	4.361	0
6.987	9.80621	4.367	0
6.996	9.80221	4.372	0
7.004	9.79821	4.377	0
7.013	9.79686	4.383	0
7.021	9.79726	4.388	0
7.03	9.79765	4.393	0
7.039	9.79805	4.399	0
7.047	9.79844	4.404	0
7.056	9.79883	4.409	0
7.064	9.79799	4.415	0
7.073	9.795	4.42	0
7.081	9.79202	4.425	0
7.09	9.78904	4.431	0
7.098	9.78605	4.436	0
7.107	9.78307	4.442	0
7.115	9.78162	4.447	0
7.124	9.79016	4.452	0
7.133	9.79869	4.458	0
7.141	9.80722	4.463	0
7.15	9.81576	4.468	0
7.158	9.82429	4.474	0
7.167	9.83282	4.479	0
7.175	9.84551	4.484	0
7.184	9.85867	4.49	0
7.192	9.87183	4.495	0
7.201	9.88499	4.5	0
7.21	9.89815	4.506	0
7.218	9.9113	4.511	0
7.227	9.89366	4.516	0
7.235	9.86056	4.522	0
7.244	9.82746	4.527	0
7.252	9.79436	4.532	0
7.261	9.76126	4.538	0
7.269	9.72816	4.543	0
7.278	9.71024	4.548	0
7.287	9.71235	4.554	0
7.295	9.71446	4.559	0
7.304	9.71657	4.564	0
7.312	9.71868	4.57	0
7.321	9.72079	4.575	0
7.329	9.72271	4.58	0
7.338	9.72386	4.586	0
7.346	9.725	4.591	0
7.355	9.72615	4.597	0
7.364	9.7273	4.602	0
7.372	9.72845	4.607	0
7.381	9.72959	4.613	0
7.389	9.72019	4.618	0
7.398	9.71035	4.623	0
7.406	9.70051	4.629	0
7.415	9.69068	4.634	0
7.423	9.68084	4.639	0
7.432	9.671	4.645	0
7.44	9.67555	4.65	0
7.449	9.68548	4.655	0
7.458	9.69541	4.661	0
7.466	9.70535	4.666	0
7.475	9.71528	4.671	0
7.483	9.72521	4.677	0
7.492	9.72768	4.682	0
7.5	9.72244	4.687	0
7.509	9.7172	4.693	0
7.517	9.71195	4.698	0
7.526	9.70672	4.703	0
7.535	9.70147	4.709	0
7.543	9.6939	4.714	0
7.552	9.67961	4.719	0
7.56	9.66532	4.725	0
7.569	9.65103	4.73	0
7.577	9.63674	4.735	0
7.586	9.62245	4.741	0
7.594	9.60826	4.746	0
7.603	9.59825	4.752	0
7.612	9.58824	4.757	0
7.62	9.57822	4.762	0
7.629	9.56821	4.768	0
7.637	9.5582	4.773	0
7.646	9.54819	4.778	0
7.654	9.54088	4.784	0
7.663	9.53429	4.789	0
7.671	9.52769	4.794	0
7.68	9.5211	4.8	0
7.689	9.5145	4.805	0
7.697	9.50791	4.81	0
7.706	9.51035	4.816	0
7.714	9.52002	4.821	0
7.723	9.52969	4.826	0
7.731	9.53936	4.832	0
7.74	9.54903	4.837	0
7.748	9.55869	4.842	0
7.757	9.56804	4.848	0
7.765	9.57672	4.853	0
7.774	9.58539	4.858	0
7.783	9.59407	4.864	0
7.791	9.60274	4.869	0
7.8	9.61142	4.874	0
7.808	9.61979	4.88	0
7.817	9.62485	4.885	0
7.825	9.62992	4.89	0
7.834	9.63498	4.896	0
7.842	9.64004	4.901	0
7.851	9.64511	4.907	0
7.86	9.65017	4.912	0
7.868	9.64746	4.917	0
7.877	9.6434	4.923	0
7.885	9.63933	4.928	0
7.894	9.63527	4.933	0
7.902	9.6312	4.939	0
7.911	9.62714	4.944	0
7.919	9.62131	4.949	0
7.928	9.61437	4.955	0
7.937	9.60744	4.96	0
7.945	9.60051	4.965	0
7.954	9.59357	4.971	0
7.962	9.58664	4.976	0
7.971	9.57656	4.981	0
7.979	9.56144	4.987	0
7.988	9.54631	4.992	0
7.996	9.53119	4.997	0
8.005	9.51606	5.003	0
8.013	9.50094	5.008	0
8.022	9.4875	5.013	0
8.031	9.48367	5.019	0
8.039	9.47984	5.024	0
8.048	9.47601	5.029	0
8.056	9.47218	5.035	0
8.065	9.46835	5.04	0
8.073	9.46452	5.045	0
8.082	9.45573	5.051	0
8.09	9.44646	5.056	0
8.099	9.4372	5.062	0
8.108	9.42794	5.067	0
8.116	9.41868	5.072	0
8.125	9.40942	5.078	0
8.133	9.39984	5.083	0
8.142	9.39013	5.088	0
8.15	9.38041	5.094	0
8.159	9.37069	5.099	0
8.167	9.36097	5.104	0
8.176	9.35125	5.11	0
8.185	9.34387	5.115	0
8.193	9.33941	5.12	0
8.202	9.33495	5.126	0
8.21	9.3305	5.131	0
8.219	9.32603	5.136	0
8.227	9.32158	5.142	0
8.236	9.31673	5.147	0
8.244	9.31043	5.152	0
8.253	9.30413	5.158	0
8.262	9.29782	5.163	0
8.27	9.29152	5.168	0
8.279	9.28522	5.174	0
8.287	9.27891	5.179	0
8.296	9.28673	5.184	0
8.304	9.29488	5.19	0
8.313	9.30303	5.195	0
8.321	9.31119	5.2	0
8.33	9.31935	5.206	0
8.338	9.3275	5.211	0
8.347	9.33205	5.217	0
8.356	9.33535	5.222	0
8.364	9.33864	5.227	0
8.373	9.34194	5.233	0
8.381	9.34523	5.238	0
8.39	9.34853	5.243	0
8.398	9.35387	5.249	0
8.407	9.3612	5.254	0
8.415	9.36853	5.259	0
8.424	9.37586	5.265	0
8.433	9.38318	5.27	0
8.441	9.39051	5.275	0
8.45	9.39567	5.281	0
8.458	9.39506	5.286	0
8.467	9.39445	5.291	0
8.475	9.39384	5.297	0
8.484	9.39323	5.302	0
8.492	9.39262	5.307	0
8.501	9.39081	5.313	0
8.51	9.35884	5.318	0
8.518	9.32687	5.323	0
8.527	9.29491	5.329	0
8.535	9.26294	5.334	0
8.544	9.23097	5.339	0
8.552	9.199	5.345	0
8.561	9.18264	5.35	0
8.569	9.17009	5.355	0
8.578	9.15754	5.361	0
8.586	9.14499	5.366	0
8.595	9.13245	5.372	0
8.604	9.1199	5.377	0
8.612	9.12468	5.382	0
8.621	9.14256	5.388	0
8.629	9.16044	5.393	0
8.638	9.17833	5.398	0
8.646	9.19621	5.404	0
8.655	9.21409	5.409	0
8.663	9.22833	5.414	0
8.672	9.23531	5.42	0
8.681	9.24229	5.425	0
8.689	9.24927	5.43	0
8.698	9.25625	5.436	0
8.706	9.26323	5.441	0
8.715	9.2679	5.446	0
8.723	9.25228	5.452	0
8.732	9.23665	5.457	0
8.74	9.22102	5.462	0
8.749	9.2054	5.468	0
8.758	9.18977	5.473	0
8.766	9.17414	5.478	0
8.775	9.16105	5.484	0
8.783	9.14835	5.489	0
8.792	9.13564	5.494	0
8.8	9.12294	5.5	0
8.809	9.11023	5.505	0
8.817	9.09753	5.51	0
8.826	9.11041	5.516	0
8.835	9.1382	5.521	0
8.843	9.16599	5.527	0
8.852	9.19378	5.532	0
8.86	9.22156	5.537	0
8.869	9.24935	5.543	0
8.877	9.26551	5.548	0
8.886	9.26399	5.553	0
8.894	9.26247	5.559	0
8.903	9.26095	5.564	0
8.911	9.25943	5.569	0
8.92	9.2579	5.575	0
8.929	9.25379	5.58	0
8.937	9.23632	5.585	0
8.946	9.21885	5.591	0
8.954	9.20139	5.596	0
8.963	9.18392	5.601	0
8.971	9.16645	5.607	0
8.98	9.14898	5.612	0
8.988	9.13667	5.617	0
8.997	9.12475	5.623	0
9.006	9.11282	5.628	0
9.014	9.1009	5.633	0
9.023	9.08898	5.639	0
9.031	9.07706	5.644	0
9.04	9.06941	5.649	0
9.048	9.06363	5.655	0
9.057	9.05785	5.66	0
9.065	9.05208	5.665	0
9.074	9.0463	5.671	0
9.083	9.04053	5.676	0
9.091	9.04441	5.682	0
9.1	9.05971	5.687	0
9.108	9.07501	5.692	0
9.117	9.09031	5.698	0
9.125	9.10561	5.703	0
9.134	9.1209	5.708	0
9.142	9.12989	5.714	0
9.151	9.11731	5.719	0
9.159	9.10473	5.724	0
9.168	9.09216	5.73	0
9.177	9.07958	5.735	0
9.185	9.06701	5.74	0
9.194	9.05443	5.746	0
9.202	9.05428	5.751	0
9.211	9.05424	5.756	0
9.219	9.05419	5.762	0
9.228	9.05414	5.767	0
9.236	9.0541	5.772	0
9.245	9.05405	5.778	0
9.254	9.04995	5.783	0
9.262	9.04454	5.788	0
9.271	9.03913	5.794	0
9.279	9.03373	5.799	0
9.288	9.02832	5.804	0
9.296	9.02291	5.81	0
9.305	9.01331	5.815	0
9.313	8.99985	5.82	0
9.322	8.9864	5.826	0
9.331	8.97294	5.831	0
9.339	8.95949	5.837	0
9.348	8.94603	5.842	0
9.356	8.93811	5.847	0
9.365	8.94393	5.853	0
9.373	8.94975	5.858	0
9.382	8.95557	5.863	0
9.39	8.96139	5.869	0
9.399	8.96721	5.874	0
9.408	8.97273	5.879	0
9.416	8.97301	5.885	0
9.425	8.97328	5.89	0
9.433	8.97355	5.895	0
9.442	8.97383	5.901	0
9.45	8.9741	5.906	0
9.459	8.97437	5.911	0
9.467	8.96203	5.917	0
9.476	8.94692	5.922	0
9.484	8.93181	5.927	0
9.493	8.91671	5.933	0
9.502	8.9016	5.938	0
9.51	8.88649	5.943	0
9.519	8.87391	5.949	0
9.527	8.86312	5.954	0
9.536	8.85233	5.959	0
9.544	8.84154	5.965	0
9.553	8.83075	5.97	0
9.561	8.81996	5.975	0
9.57	8.81967	5.981	0
9.579	8.83893	5.986	0
9.587	8.85819	5.992	0
9.596	8.87744	5.997	0
9.604	8.89671	6.002	0
9.613	8.91596	6.008	0
9.621	8.93522	6.013	0
9.63	8.95443	6.018	0
9.638	8.97365	6.024	0
9.647	8.99286	6.029	0
9.656	9.01208	6.034	0
9.664	9.03129	6.04	0
9.673	9.05051	6.045	0
9.681	9.0395	6.05	0
9.69	9.0244	6.056	0
9.698	9.0093	6.061	0
9.707	8.9942	6.066	0
9.715	8.97909	6.072	0
9.724	8.96399	6.077	0
9.732	8.94792	6.082	0
9.741	8.93131	6.088	0
9.75	8.91471	6.093	0
9.758	8.8981	6.098	0
9.767	8.88149	6.104	0
9.775	8.86489	6.109	0
9.784	8.85346	6.114	0
9.792	8.84942	6.12	0
9.801	8.84538	6.125	0
9.809	8.84134	6.13	0
9.818	8.83731	6.136	0
9.827	8.83327	6.141	0
9.835	8.82891	6.147	0
9.844	8.82306	6.152	0
9.852	8.81721	6.157	0
9.861	8.81136	6.163	0
9.869	8.80551	6.168	0
9.878	8.79966	6.173	0
9.886	8.79381	6.179	0
9.895	8.78748	6.184	0
9.904	8.78113	6.189	0
9.912	8.77478	6.195	0
9.921	8.76842	6.2	0
9.929	8.76207	6.205	0
9.938	8.75572	6.211	0
9.946	8.75635	6.216	0
9.955	8.75983	6.221	0
9.963	8.76332	6.227	0
9.972	8.7668	6.232	0
9.981	8.77029	6.237	0
9.989	8.77378	6.243	0
9.998	8.77688	6.248	0
10.006	8.77957	6.253	0
10.015	8.78225	6.259	0
10.023	8.78493	6.264	0
10.032	8.78762	6.269	0
10.04	8.7903	6.275	0
10.049	8.79094	6.28	0
10.057	8.78509	6.285	0
10.066	8.77925	6.291	0
10.075	8.7734	6.296	0
10.083	8.76755	6.302	0
10.092	8.7617	6.307	0
10.1	8.75586	6.312	0
10.109	8.75069	6.318	0
10.117	8.74552	6.323	0
10.126	8.74035	6.328	0
10.134	8.73519	6.334	0
10.143	8.73002	6.339	0
10.152	8.72485	6.344	0
10.16	8.7354	6.35	0
10.169	8.75063	6.355	0
10.177	8.76586	6.36	0
10.186	8.78109	6.366	0
10.194	8.79632	6.371	0
10.203	8.81155	6.376	0
10.211	8.81706	6.382	0
10.22	8.81422	6.387	0
10.229	8.81138	6.392	0
10.237	8.80854	6.398	0
10.246	8.8057	6.403	0
10.254	8.80286	6.408	0
10.263	8.79522	6.414	0
10.271	8.77651	6.419	0
10.28	8.75781	6.424	0
10.288	8.7391	6.43	0
10.297	8.72039	6.435	0
10.306	8.70168	6.44	0
10.314	8.68483	6.446	0
10.323	8.69339	6.451	0
10.331	8.70196	6.456	0
10.34	8.71053	6.462	0
10.348	8.7191	6.467	0
10.357	8.72766	6.473	0
10.365	8.73623	6.478	0
10.374	8.74387	6.483	0
10.382	8.75133	6.489	0
10.391	8.75878	6.494	0
10.4	8.76624	6.499	0
10.408	8.77369	6.505	0
10.417	8.78115	6.51	0
10.425	8.78214	6.515	0
10.434	8.77879	6.521	0
10.442	8.77545	6.526	0
10.451	8.7721	6.531	0
10.459	8.76876	6.537	0
10.468	8.76542	6.542	0
10.477	8.76489	6.547	0
10.485	8.7693	6.553	0
10.494	8.77371	6.558	0
10.502	8.77812	6.563	0
10.511	8.78253	6.569	0
10.519	8.78693	6.574	0
10.528	8.7905	6.579	0
10.536	8.78844	6.585	0
10.545	8.78638	6.59	0
10.554	8.78432	6.595	0
10.562	8.78226	6.601	0
10.571	8.7802	6.606	0
10.579	8.77814	6.611	0
10.588	8.7848	6.617	0
10.596	8.79247	6.622	0
10.605	8.80015	6.628	0
10.613	8.80782	6.633	0
10.622	8.8155	6.638	0
10.63	8.82318	6.644	0
10.639	8.84005	6.649	0
10.648	8.86161	6.654	0
10.656	8.88316	6.66	0
10.665	8.90472	6.665	0
10.673	8.92627	6.67	0
10.682	8.94783	6.676	0
10.69	8.96262	6.681	0
10.699	8.96834	6.686	0
10.707	8.97405	6.692	0
10.716	8.97977	6.697	0
10.725	8.98549	6.702	0
10.733	8.99121	6.708	0
10.742	8.99441	6.713	0
10.75	8.98699	6.718	0
10.759	8.97958	6.724	0
10.767	8.97217	6.729	0
10.776	8.96475	6.734	0
10.784	8.95734	6.74	0
10.793	8.94992	6.745	0
10.802	8.94848	6.75	0
10.81	8.9473	6.756	0
10.819	8.94612	6.761	0
10.827	8.94495	6.766	0
10.836	8.94377	6.772	0
10.844	8.9426	6.777	0
10.853	8.94172	6.783	0
10.861	8.94095	6.788	0
10.87	8.94018	6.793	0
10.879	8.93942	6.799	0
10.887	8.93865	6.804	0
10.896	8.93788	6.809	0
10.904	8.93908	6.815	0
10.913	8.94232	6.82	0
10.921	8.94557	6.825	0
10.93	8.94881	6.831	0
10.938	8.95206	6.836	0
10.947	8.9553	6.841	0
10.955	8.95703	6.847	0
10.964	8.95431	6.852	0
10.973	8.95159	6.857	0
10.981	8.94888	6.863	0
10.99	8.94616	6.868	0
10.998	8.94345	6.873	0
11.007	8.94064	6.879	0
11.015	8.93364	6.884	0
11.024	8.92665	6.889	0
11.032	8.91966	6.895	0
11.041	8.91266	6.9	0
11.05	8.90567	6.905	0
11.058	8.89867	6.911	0
11.067	8.88966	6.916	0
11.075	8.8801	6.921	0
11.084	8.87054	6.927	0
11.092	8.86098	6.932	0
11.101	8.85142	6.938	0
11.109	8.84187	6.943	0
11.118	8.83901	6.948	0
11.127	8.84162	6.954	0
11.135	8.84424	6.959	0
11.144	8.84685	6.964	0
11.152	8.84947	6.97	0
11.161	8.85208	6.975	0
11.169	8.85248	6.98	0
11.178	8.8481	6.986	0
11.186	8.84372	6.991	0
11.195	8.83935	6.996	0
11.203	8.83497	7.002	0
11.212	8.8306	7.007	0
11.221	8.8272	7.012	0
11.229	8.83484	7.018	0
11.238	8.84249	7.023	0
11.246	8.85013	7.028	0
11.255	8.85778	7.034	0
11.263	8.86543	7.039	0
11.272	8.87307	7.044	0
11.28	8.86953	7.05	0
11.289	8.86398	7.055	0
11.298	8.85844	7.06	0
11.306	8.85289	7.066	0
11.315	8.84735	7.071	0
11.323	8.84181	7.076	0
11.332	8.83698	7.082	0
11.34	8.8326	7.087	0
11.349	8.82823	7.093	0
11.357	8.82386	7.098	0
11.366	8.81948	7.103	0
11.375	8.81511	7.109	0
11.383	8.81445	7.114	0
11.392	8.81987	7.119	0
11.4	8.82528	7.125	0
11.409	8.83069	7.13	0
11.417	8.8361	7.135	0
11.426	8.84151	7.141	0
11.434	8.84588	7.146	0
11.443	8.84409	7.151	0
11.452	8.8423	7.157	0
11.46	8.84051	7.162	0
11.469	8.83873	7.167	0
11.477	8.83694	7.173	0
11.486	8.83515	7.178	0
11.494	8.82402	7.183	0
11.503	8.81199	7.189	0
11.511	8.79996	7.194	0
11.52	8.78792	7.199	0
11.528	8.77589	7.205	0
11.537	8.76385	7.21	0
11.546	8.76256	7.215	0
11.554	8.76642	7.221	0
11.563	8.77028	7.226	0
11.571	8.77415	7.231	0
11.58	8.77801	7.237	0
11.588	8.78187	7.242	0
11.597	8.78252	7.248	0
11.605	8.77907	7.253	0
11.614	8.77563	7.258	0
11.623	8.77219	7.264	0
11.631	8.76874	7.269	0
11.64	8.7653	7.274	0
11.648	8.76193	7.28	0
11.657	8.75883	7.285	0
11.665	8.75574	7.29	0
11.674	8.75264	7.296	0
11.682	8.74954	7.301	0
11.691	8.74645	7.306	0
11.7	8.74335	7.312	0
11.708	8.74159	7.317	0
11.717	8.73986	7.322	0
11.725	8.73814	7.328	0
11.734	8.73641	7.333	0
11.742	8.73469	7.338	0
11.751	8.73296	7.344	0
11.759	8.73111	7.349	0
11.768	8.72921	7.354	0
11.776	8.72732	7.36	0
11.785	8.72542	7.365	0
11.794	8.72353	7.37	0
11.802	8.72164	7.376	0
11.811	8.72142	7.381	0
11.819	8.72284	7.386	0
11.828	8.72427	7.392	0
11.836	8.7257	7.397	0
11.845	8.72712	7.403	0
11.853	8.72855	7.408	0
11.862	8.73108	7.413	0
11.871	8.73659	7.419	0
11.879	8.7421	7.424	0
11.888	8.74761	7.429	0
11.896	8.75312	7.435	0
11.905	8.75863	7.44	0
11.913	8.7638	7.445	0
11.922	8.75942	7.451	0
11.93	8.75504	7.456	0
11.939	8.75067	7.461	0
11.948	8.74629	7.467	0
11.956	8.74191	7.472	0
11.965	8.73754	7.477	0
11.973	8.73586	7.483	0
11.982	8.73486	7.488	0
11.99	8.73387	7.493	0
11.999	8.73287	7.499	0
12.007	8.73187	7.504	0
12.016	8.73087	7.509	0
12.025	8.7286	7.515	0
12.033	8.72535	7.52	0
12.042	8.72209	7.525	0
12.05	8.71883	7.531	0
12.059	8.71558	7.536	0
12.067	8.71232	7.541	0
12.076	8.71097	7.547	0
12.084	8.71346	7.552	0
12.093	8.71596	7.558	0
12.101	8.71846	7.563	0
12.11	8.72095	7.568	0
12.119	8.72345	7.574	0
12.127	8.72463	7.579	0
12.136	8.71352	7.584	0
12.144	8.70241	7.59	0
12.153	8.6913	7.595	0
12.161	8.68019	7.6	0
12.17	8.66908	7.606	0
12.178	8.65797	7.611	0
12.187	8.66375	7.616	0
12.196	8.67221	7.622	0
12.204	8.68068	7.627	0
12.213	8.68914	7.632	0
12.221	8.69761	7.638	0
12.23	8.70607	7.643	0
12.238	8.70964	7.648	0
12.247	8.71033	7.654	0
12.255	8.71103	7.659	0
12.264	8.71172	7.664	0
12.273	8.71242	7.67	0
12.281	8.71311	7.675	0
12.29	8.71072	7.68	0
12.298	8.70358	7.686	0
12.307	8.69644	7.691	0
12.315	8.6893	7.696	0
12.324	8.68216	7.702	0
12.332	8.67502	7.707	0
12.341	8.66834	7.713	0
12.349	8.66407	7.718	0
12.358	8.65981	7.723	0
12.367	8.65555	7.729	0
12.375	8.65129	7.734	0
12.384	8.64703	7.739	0
12.392	8.64276	7.745	0
12.401	8.64286	7.75	0
12.409	8.64331	7.755	0
12.418	8.64375	7.761	0
12.426	8.6442	7.766	0
12.435	8.64465	7.771	0
12.444	8.6451	7.777	0
12.452	8.64733	7.782	0
12.461	8.65038	7.787	0
12.469	8.65342	7.793	0
12.478	8.65645	7.798	0
12.486	8.65949	7.803	0
12.495	8.66253	7.809	0
12.503	8.66586	7.814	0
12.512	8.66954	7.819	0
12.521	8.67321	7.825	0
12.529	8.67688	7.83	0
12.538	8.68056	7.835	0
12.546	8.68423	7.841	0
12.555	8.68547	7.846	0
12.563	8.67823	7.851	0
12.572	8.671	7.857	0
12.58	8.66376	7.862	0
12.589	8.65653	7.868	0
12.598	8.6493	7.873	0
12.606	8.64206	7.878	0
12.615	8.63278	7.884	0
12.623	8.62347	7.889	0
12.632	8.61416	7.894	0
12.64	8.60484	7.9	0
12.649	8.59553	7.905	0
12.657	8.58622	7.91	0
12.666	8.58062	7.916	0
12.674	8.57624	7.921	0
12.683	8.57186	7.926	0
12.692	8.56748	7.932	0
12.7	8.56311	7.937	0
12.709	8.55873	7.942	0
12.717	8.55712	7.948	0
12.726	8.5581	7.953	0
12.734	8.55907	7.958	0
12.743	8.56005	7.964	0
12.751	8.56103	7.969	0
12.76	8.56201	7.974	0
12.769	8.56418	7.98	0
12.777	8.56937	7.985	0
12.786	8.57456	7.99	0
12.794	8.57976	7.996	0
12.803	8.58495	8.001	0
12.811	8.59014	8.006	0
12.82	8.59494	8.012	0
12.828	8.59187	8.017	0
12.837	8.5888	8.023	0
12.846	8.58574	8.028	0
12.854	8.58267	8.033	0
12.863	8.5796	8.039	0
12.871	8.57654	8.044	0
12.88	8.57232	8.049	0
12.888	8.56785	8.055	0
12.897	8.56338	8.06	0
12.905	8.5589	8.065	0
12.914	8.55443	8.071	0
12.922	8.54996	8.076	0
12.931	8.55218	8.081	0
12.94	8.55922	8.087	0
12.948	8.56626	8.092	0
12.957	8.57331	8.097	0
12.965	8.58035	8.103	0
12.974	8.5874	8.108	0
12.982	8.59207	8.113	0
12.991	8.5923	8.119	0
12.999	8.59253	8.124	0
13.008	8.59277	8.129	0
13.017	8.593	8.135	0
13.025	8.59323	8.14	0
13.034	8.59436	8.145	0
13.042	8.60274	8.151	0
13.051	8.61113	8.156	0
13.059	8.61951	8.161	0
13.068	8.62789	8.167	0
13.076	8.63628	8.172	0
13.085	8.64466	8.178	0
13.094	8.63581	8.183	0
13.102	8.62457	8.188	0
13.111	8.61332	8.194	0
13.119	8.60207	8.199	0
13.128	8.59082	8.204	0
13.136	8.57957	8.21	0
13.145	8.57966	8.215	0
13.153	8.58609	8.22	0
13.162	8.59252	8.226	0
13.171	8.59894	8.231	0
13.179	8.60537	8.236	0
13.188	8.6118	8.242	0
13.196	8.61425	8.247	0
13.205	8.61097	8.252	0
13.213	8.60768	8.258	0
13.222	8.60439	8.263	0
13.23	8.6011	8.268	0
13.239	8.59781	8.274	0
13.247	8.59452	8.279	0
13.256	8.59123	8.284	0
13.265	8.58793	8.29	0
13.273	8.58464	8.295	0
13.282	8.58135	8.3	0
13.29	8.57806	8.306	0
13.299	8.57476	8.311	0
13.307	8.56716	8.316	0
13.316	8.55928	8.322	0
13.324	8.55141	8.327	0
13.333	8.54353	8.333	0
13.342	8.53566	8.338	0
13.35	8.52778	8.343	0
13.359	8.52656	8.349	0
13.367	8.52813	8.354	0
13.376	8.5297	8.359	0
13.384	8.53127	8.365	0
13.393	8.53284	8.37	0
13.401	8.53441	8.375	0
13.41	8.53308	8.381	0
13.419	8.5285	8.386	0
13.427	8.52392	8.391	0
13.436	8.51934	8.397	0
13.444	8.51476	8.402	0
13.453	8.51018	8.407	0
13.461	8.50678	8.413	0
13.47	8.50717	8.418	0
13.478	8.50757	8.423	0
13.487	8.50797	8.429	0
13.496	8.50836	8.434	0
13.504	8.50876	8.439	0
13.513	8.50916	8.445	0
13.521	8.50969	8.45	0
13.53	8.51022	8.455	0
13.538	8.51075	8.461	0
13.547	8.51128	8.466	0
13.555	8.51181	8.471	0
13.564	8.51234	8.477	0
13.572	8.51353	8.482	0
13.581	8.51493	8.488	0
13.59	8.51633	8.493	0
13.598	8.51774	8.498	0
13.607	8.51914	8.504	0
13.615	8.52054	8.509	0
13.624	8.51924	8.514	0
13.632	8.51557	8.52	0
13.641	8.5119	8.525	0
13.649	8.50824	8.53	0
13.658	8.50457	8.536	0
13.667	8.5009	8.541	0
13.675	8.49886	8.546	0
13.684	8.5006	8.552	0
13.692	8.50234	8.557	0
13.701	8.50408	8.562	0
13.709	8.50582	8.568	0
13.718	8.50757	8.573	0
13.726	8.50851	8.578	0
13.735	8.49813	8.584	0
13.744	8.48776	8.589	0
13.752	8.47738	8.594	0
13.761	8.467	8.6	0
13.769	8.45663	8.605	0
13.778	8.44625	8.61	0
13.786	8.45643	8.616	0
13.795	8.47089	8.621	0
13.803	8.48534	8.626	0
13.812	8.4998	8.632	0
13.82	8.51425	8.637	0
13.829	8.52871	8.643	0
13.838	8.52934	8.648	0
13.846	8.52058	8.653	0
13.855	8.51183	8.659	0
13.863	8.50307	8.664	0
13.872	8.49431	8.669	0
13.88	8.48555	8.675	0
13.889	8.47712	8.68	0
13.897	8.46928	8.685	0
13.906	8.46143	8.691	0
13.915	8.45358	8.696	0
13.923	8.44574	8.701	0
13.932	8.43789	8.707	0
13.94	8.43071	8.712	0
13.949	8.42814	8.717	0
13.957	8.42557	8.723	0
13.966	8.423	8.728	0
13.974	8.42042	8.733	0
13.983	8.41785	8.739	0
13.992	8.41528	8.744	0
14	8.41394	8.749	0
14.009	8.41275	8.755	0
14.017	8.41156	8.76	0
14.026	8.41036	8.765	0
14.034	8.40917	8.771	0
14.043	8.40798	8.776	0
14.051	8.40511	8.781	0
14.06	8.40138	8.787	0
14.069	8.39765	8.792	0
14.077	8.39391	8.798	0
14.086	8.39018	8.803	0
14.094	8.38645	8.808	0
14.103	8.38825	8.814	0
14.111	8.39761	8.819	0
14.12	8.40698	8.824	0
14.128	8.41634	8.83	0
14.137	8.42571	8.835	0
14.145	8.43507	8.84	0
14.154	8.44308	8.846	0
14.163	8.44523	8.851	0
14.171	8.44738	8.856	0
14.18	8.44953	8.862	0
14.188	8.45168	8.867	0
14.197	8.45383	8.872	0
14.205	8.45598	8.878	0
14.214	8.45109	8.883	0
14.222	8.44586	8.888	0
14.231	8.44064	8.894	0
14.24	8.43541	8.899	0
14.248	8.43018	8.904	0
14.257	8.42495	8.91	0
14.265	8.41828	8.915	0
14.274	8.41104	8.92	0
14.282	8.40381	8.926	0
14.291	8.39657	8.931	0
14.299	8.38933	8.936	0
14.308	8.3821	8.942	0
14.317	8.37964	8.947	0
14.325	8.38227	8.953	0
14.334	8.3849	8.958	0
14.342	8.38753	8.963	0
14.351	8.39015	8.969	0
14.359	8.39278	8.974	0
14.368	8.394	8.979	0
14.376	8.39103	8.985	0
14.385	8.38805	8.99	0
14.393	8.38508	8.995	0
14.402	8.38211	9.001	0
14.411	8.37914	9.006	0
14.419	8.37632	9.011	0
14.428	8.38251	9.017	0
14.436	8.3887	9.022	0
14.445	8.39489	9.027	0
14.453	8.40108	9.033	0
14.462	8.40727	9.038	0
14.47	8.41346	9.043	0
14.479	8.41174	9.049	0
14.488	8.40785	9.054	0
14.496	8.40395	9.059	0
14.505	8.40006	9.065	0
14.513	8.39616	9.07	0
14.522	8.39227	9.075	0
14.53	8.39016	9.081	0
14.539	8.38952	9.086	0
14.547	8.38888	9.091	0
14.556	8.38824	9.097	0
14.565	8.3876	9.102	0
14.573	8.38696	9.108	0
14.582	8.38462	9.113	0
14.59	8.37858	9.118	0
14.599	8.37253	9.124	0
14.607	8.36648	9.129	0
14.616	8.36043	9.134	0
14.624	8.35438	9.14	0
14.633	8.34872	9.145	0
14.642	8.34768	9.15	0
14.65	8.34664	9.156	0
14.659	8.34559	9.161	0
14.667	8.34455	9.166	0
14.676	8.34351	9.172	0
14.684	8.34247	9.177	0
14.693	8.3415	9.182	0
14.701	8.34054	9.188	0
14.71	8.33958	9.193	0
14.718	8.33862	9.198	0
14.727	8.33766	9.204	0
14.736	8.33671	9.209	0
14.744	8.33685	9.214	0
14.753	8.3377	9.22	0
14.761	8.33854	9.225	0
14.77	8.33939	9.23	0
14.778	8.34023	9.236	0
14.787	8.34108	9.241	0
14.795	8.34026	9.246	0
14.804	8.33671	9.252	0
14.813	8.33316	9.257	0
14.821	8.32961	9.263	0
14.83	8.32605	9.268	0
14.838	8.3225	9.273	0
14.847	8.32043	9.279	0
14.855	8.32744	9.284	0
14.864	8.33444	9.289	0
14.872	8.34145	9.295	0
14.881	8.34846	9.3	0
14.89	8.35547	9.305	0
14.898	8.36248	9.311	0
14.907	8.35893	9.316	0
14.915	8.3543	9.321	0
14.924	8.34967	9.327	0
14.932	8.34504	9.332	0
14.941	8.34041	9.337	0
14.949	8.33578	9.343	0
14.958	8.32762	9.348	0
14.966	8.31774	9.353	0
14.975	8.30786	9.359	0
14.984	8.29798	9.364	0
14.992	8.2881	9.369	0
15.001	8.27821	9.375	0
15.009	8.27402	9.38	0
15.018	8.27712	9.385	0
15.026	8.28022	9.391	0
15.035	8.28332	9.396	0
15.043	8.28642	9.401	0
15.052	8.28952	9.407	0
15.061	8.29216	9.412	0
15.069	8.29298	9.418	0
15.078	8.2938	9.423	0
15.086	8.29462	9.428	0
15.095	8.29544	9.434	0
15.103	8.29626	9.439	0
15.112	8.29707	9.444	0
15.12	8.3026	9.45	0
15.129	8.30827	9.455	0
15.138	8.31393	9.46	0
15.146	8.31959	9.466	0
15.155	8.32526	9.471	0
15.163	8.33092	9.476	0
15.172	8.33591	9.482	0
15.18	8.34066	9.487	0
15.189	8.34541	9.492	0
15.197	8.35017	9.498	0
15.206	8.35492	9.503	0
15.215	8.35967	9.508	0
15.223	8.35672	9.514	0
15.232	8.34616	9.519	0
15.24	8.3356	9.524	0
15.249	8.32504	9.53	0
15.257	8.31448	9.535	0
15.266	8.30392	9.54	0
15.274	8.29607	9.546	0
15.283	8.29573	9.551	0
15.291	8.29539	9.556	0
15.3	8.29506	9.562	0
15.309	8.29472	9.567	0
15.317	8.29438	9.573	0
15.326	8.29418	9.578	0
15.334	8.29811	9.583	0
15.343	8.30203	9.589	0
15.351	8.30596	9.594	0
15.36	8.30988	9.599	0
15.368	8.31381	9.605	0
15.377	8.31774	9.61	0
15.386	8.31797	9.615	0
15.394	8.31725	9.621	0
15.403	8.31653	9.626	0
15.411	8.31581	9.631	0
15.42	8.31509	9.637	0
15.428	8.31437	9.642	0
15.437	8.31211	9.647	0
15.445	8.30865	9.653	0
15.454	8.30518	9.658	0
15.463	8.30172	9.663	0
15.471	8.29826	9.669	0
15.48	8.2948	9.674	0
15.488	8.29197	9.679	0
15.497	8.29042	9.685	0
15.505	8.28888	9.69	0
15.514	8.28733	9.695	0
15.522	8.28579	9.701	0
15.531	8.28425	9.706	0
15.539	8.28245	9.711	0
15.548	8.27825	9.717	0
15.557	8.27406	9.722	0
15.565	8.26986	9.728	0
15.574	8.26567	9.733	0
15.582	8.26148	9.738	0
15.591	8.25728	9.744	0
15.599	8.25467	9.749	0
15.608	8.25232	9.754	0
15.616	8.24996	9.76	0
15.625	8.24761	9.765	0
15.634	8.24526	9.77	0
15.642	8.24291	9.776	0
15.651	8.24196	9.781	0
15.659	8.24186	9.786	0
15.668	8.24176	9.792	0
15.676	8.24166	9.797	0
15.685	8.24156	9.802	0
15.693	8.24146	9.808	0
15.702	8.23893	9.813	0
15.711	8.2326	9.818	0
15.719	8.22626	9.824	0
15.728	8.21992	9.829	0
15.736	8.21359	9.834	0
15.745	8.20725	9.84	0
15.753	8.20176	9.845	0
15.762	8.20077	9.85	0
15.77	8.19978	9.856	0
15.779	8.19879	9.861	0
15.788	8.19781	9.866	0
15.796	8.19682	9.872	0
15.805	8.19583	9.877	0
15.813	8.19768	9.883	0
15.822	8.19977	9.888	0
15.83	8.20186	9.893	0
15.839	8.20395	9.899	0
15.847	8.20604	9.904	0
15.856	8.20813	9.909	0
15.864	8.21357	9.915	0
15.873	8.22051	9.92	0
15.882	8.22745	9.925	0
15.89	8.2344	9.931	0
15.899	8.24134	9.936	0
15.907	8.24829	9.941	0
15.916	8.24935	9.947	0
15.924	8.24332	9.952	0
15.933	8.2373	9.957	0
15.941	8.23128	9.963	0
15.95	8.22525	9.968	0
15.959	8.21923	9.973	0
15.967	8.2137	9.979	0
15.976	8.20992	9.984	0
15.984	8.20615	9.989	0
15.993	8.20237	9.995	0
16.001	8.19859	10	0
16.01	8.19482	10.005	0
16.018	8.19104	10.011	0
16.027	8.19074	10.016	0
16.036	8.19049	10.021	0
16.044	8.19024	10.027	0
16.053	8.18999	10.032	0
16.061	8.18974	10.038	0
16.07	8.1895	10.043	0
16.078	8.18958	10.048	0
16.087	8.18979	10.054	0
16.095	8.18999	10.059	0
16.104	8.19019	10.064	0
16.113	8.19039	10.07	0
16.121	8.19059	10.075	0
16.13	8.18793	10.08	0
16.138	8.18257	10.086	0
16.147	8.17721	10.091	0
16.155	8.17185	10.096	0
16.164	8.16649	10.102	0
16.172	8.16113	10.107	0
16.181	8.15694	10.112	0
16.189	8.15576	10.118	0
16.198	8.15457	10.123	0
16.207	8.15338	10.128	0
16.215	8.15219	10.134	0
16.224	8.151	10.139	0
16.232	8.14979	10.144	0
16.241	8.14809	10.15	0
16.249	8.1464	10.155	0
16.258	8.1447	10.16	0
16.266	8.143	10.166	0
16.275	8.14131	10.171	0
16.284	8.13961	10.176	0
16.292	8.14251	10.182	0
16.301	8.14647	10.187	0
16.309	8.15043	10.193	0
16.318	8.15439	10.198	0
16.326	8.15835	10.203	0
16.335	8.16231	10.209	0
16.343	8.1639	10.214	0
16.352	8.16375	10.219	0
16.361	8.1636	10.225	0
16.369	8.16345	10.23	0
16.378	8.1633	10.235	0
16.386	8.16315	10.241	0
16.395	8.16039	10.246	0
16.403	8.15263	10.251	0
16.412	8.14486	10.257	0
16.42	8.1371	10.262	0
16.429	8.12933	10.267	0
16.437	8.12157	10.273	0
16.446	8.11459	10.278	0
16.455	8.11413	10.283	0
16.463	8.11367	10.289	0
16.472	8.11321	10.294	0
16.48	8.11274	10.299	0
16.489	8.11228	10.305	0
16.497	8.11182	10.31	0
16.506	8.11068	10.315	0
16.514	8.10945	10.321	0
16.523	8.10821	10.326	0
16.532	8.10698	10.331	0
16.54	8.10574	10.337	0
16.549	8.10451	10.342	0
16.557	8.10637	10.348	0
16.566	8.10996	10.353	0
16.574	8.11355	10.358	0
16.583	8.11714	10.364	0
16.591	8.12073	10.369	0
16.6	8.12432	10.374	0
16.609	8.12588	10.38	0
16.617	8.12449	10.385	0
16.626	8.1231	10.39	0
16.634	8.1217	10.396	0
16.643	8.12031	10.401	0
16.651	8.11892	10.406	0
16.66	8.11767	10.412	0
16.668	8.11715	10.417	0
16.677	8.11662	10.422	0
16.686	8.11609	10.428	0
16.694	8.11556	10.433	0
16.703	8.11503	10.438	0
16.711	8.1145	10.444	0
16.72	8.11694	10.449	0
16.728	8.11958	10.454	0
16.737	8.12221	10.46	0
16.745	8.12485	10.465	0
16.754	8.12748	10.47	0
16.762	8.13012	10.476	0
16.771	8.12866	10.481	0
16.78	8.12547	10.486	0
16.788	8.12227	10.492	0
16.797	8.11908	10.497	0
16.805	8.11588	10.503	0
16.814	8.11269	10.508	0
16.822	8.11097	10.513	0
16.831	8.11095	10.519	0
16.839	8.11092	10.524	0
16.848	8.11089	10.529	0
16.857	8.11086	10.535	0
16.865	8.11083	10.54	0
16.874	8.10921	10.545	0
16.882	8.10232	10.551	0
16.891	8.09543	10.556	0
16.899	8.08854	10.561	0
16.908	8.08165	10.567	0
16.916	8.07476	10.572	0
16.925	8.06788	10.577	0
16.934	8.06432	10.583	0
16.942	8.06077	10.588	0
16.951	8.05721	10.593	0
16.959	8.05366	10.599	0
16.968	8.05011	10.604	0
16.976	8.04656	10.609	0
16.985	8.04597	10.615	0
16.993	8.04629	10.62	0
17.002	8.04661	10.625	0
17.01	8.04692	10.631	0
17.019	8.04724	10.636	0
17.028	8.04756	10.641	0
17.036	8.04897	10.647	0
17.045	8.05135	10.652	0
17.053	8.05373	10.657	0
17.062	8.0561	10.663	0
17.07	8.05848	10.668	0
17.079	8.06085	10.674	0
17.087	8.06225	10.679	0
[truncated: 48,017 more rows]
