# Supplementary material for: Purified zymogens reveal mechanisms of snake venom metalloproteinase auto-activation
Source: eLife. 2026 Jun 10;15:RP109112. doi: 10.7554/eLife.109112 (PMC13252954; doi:10.7554/eLife.109112)
Supplement: Figure 3—figure supplement 3—source data 3. [file elife-109112-fig3-figsupp3-data3.xlsx]

## Sheet: S6a
Volume (mL)	Absorbance (mAU)
-0.01302	0
-0.0124	0.104076
-0.01177	0.104136
-0.01115	0.104685
-0.01052	0.104607
-0.0099	0.10466
-0.00927	0.104996
-0.00865	0.10506
-0.00802	0.105766
-0.0074	0.105989
-0.00678	0.105692
-0.00615	0.105799
-0.00553	0.105185
-0.0049	0.105383
-0.00428	0.105578
-0.00365	0.105824
-0.00303	0.105619
-0.00241	0.105869
-0.00178	0.106021
-0.00116	0.105279
-0.00053	0.10453
9.2e-05	0.102272
0.000717	0.102606
0.001341	0.103047
0.001965	0.103829
0.00259	0.103846
0.003214	0.104083
0.003838	0.104201
0.004463	0.104229
0.005087	0.104543
0.005711	0.104651
0.006336	0.104409
0.00696	0.104865
0.007585	0.104569
0.008209	0.104459
0.008833	0.104205
0.009458	0.103587
0.010082	0.103914
0.010706	0.104599
0.011331	0.104712
0.011955	0.105088
0.012579	0.104993
0.013204	0.105204
0.013828	0.104994
0.014452	0.105347
0.015077	0.105776
0.015701	0.105788
0.016325	0.10581
0.01695	0.10555
0.017574	0.105822
0.018198	0.106525
0.018823	0.106498
0.019447	0.106578
0.020072	0.107566
0.020696	0.107089
0.02132	0.106188
0.021945	0.106056
0.022569	0.1062
0.023193	0.107533
0.023818	0.107697
0.024442	0.107662
0.025066	0.107086
0.025691	0.107033
0.026315	0.10736
0.026939	0.106871
0.027564	0.106545
0.028188	0.106347
0.028812	0.106972
0.029437	0.106261
0.030061	0.106308
0.030686	0.107078
0.03131	0.108162
0.031934	0.107747
0.032559	0.10816
0.033183	0.108002
0.033807	0.10808
0.034432	0.107537
0.035056	0.107815
0.03568	0.108832
0.036305	0.108506
0.036929	0.107732
0.037553	0.108256
0.038178	0.107957
0.038802	0.108378
0.039426	0.10858
0.040051	0.10863
0.040675	0.108261
0.041299	0.107284
0.041924	0.106574
0.042548	0.105794
0.043173	0.105211
0.043797	0.105322
0.044421	0.103791
0.045046	0.103453
0.04567	0.103798
0.046294	0.103385
0.046919	0.102792
0.047543	0.102737
0.048167	0.103116
0.048792	0.104242
0.049416	0.10399
0.05004	0.104883
0.050665	0.106211
0.051289	0.105196
0.051913	0.105116
0.052538	0.105808
0.053162	0.107018
0.053786	0.106971
0.054411	0.107339
0.055035	0.106777
0.05566	0.107118
0.056284	0.107765
0.056908	0.106842
0.057533	0.106887
0.058157	0.10781
0.058781	0.107812
0.059406	0.108098
0.06003	0.107912
0.060654	0.107738
0.061279	0.107384
0.061903	0.10645
0.062527	0.10562
0.063152	0.106099
0.063776	0.106415
0.0644	0.105013
0.065025	0.104869
0.065649	0.10497
0.066274	0.104457
0.066898	0.103409
0.067522	0.103144
0.068147	0.103581
0.068771	0.102427
0.069395	0.102159
0.07002	0.102423
0.070644	0.101915
0.071268	0.101798
0.071893	0.102601
0.072517	0.102903
0.073141	0.103373
0.073766	0.103552
0.07439	0.104356
0.075014	0.104502
0.075639	0.105209
0.076263	0.10516
0.076887	0.104345
0.077512	0.104727
0.078136	0.10428
0.078761	0.104465
0.079385	0.104269
0.080009	0.104194
0.080634	0.104556
0.081258	0.103665
0.081882	0.10351
0.082507	0.103687
0.083131	0.103766
0.083755	0.103751
0.08438	0.102374
0.085004	0.101753
0.085628	0.100443
0.086253	0.100187
0.086877	0.10029
0.087501	0.099753
0.088126	0.099765
0.08875	0.09937
0.089374	0.099114
0.089999	0.099591
0.090623	0.099684
0.091248	0.099442
0.091872	0.099637
0.092496	0.100443
0.093121	0.101022
0.093745	0.102283
0.094369	0.101826
0.094994	0.101065
0.095618	0.101658
0.096242	0.102485
0.096867	0.10225
0.097491	0.102612
0.098115	0.1033
0.09874	0.103335
0.099364	0.103079
0.099988	0.103653
0.100613	0.103028
0.101237	0.102159
0.101862	0.101746
0.102486	0.101832
0.10311	0.101191
0.103735	0.100706
0.104359	0.099512
0.104983	0.099631
0.105608	0.099283
0.106232	0.098945
0.106856	0.09923
0.107481	0.098914
0.108105	0.099262
0.108729	0.099109
0.109354	0.098807
0.109978	0.098522
0.110602	0.097919
0.111227	0.09718
0.111851	0.09631
0.112475	0.095917
0.1131	0.095882
0.113724	0.096579
0.114349	0.097252
0.114973	0.098135
0.115597	0.099244
0.116222	0.100112
0.116846	0.10049
0.11747	0.10166
0.118095	0.103347
0.118719	0.103831
0.119343	0.104699
0.119968	0.105992
0.120592	0.105618
0.121216	0.105367
0.121841	0.105897
0.122465	0.107284
0.123089	0.108209
0.123714	0.107611
0.124338	0.108793
0.124962	0.108258
0.125587	0.109064
0.126211	0.109566
0.126836	0.110083
0.12746	0.110964
0.128084	0.111646
0.128709	0.112098
0.129333	0.112825
0.129957	0.113785
0.130582	0.114767
0.131206	0.115689
0.13183	0.117213
0.132455	0.118671
0.133079	0.119804
0.133703	0.121113
0.134328	0.122253
0.134952	0.124196
0.135576	0.126354
0.136201	0.126906
0.136825	0.126869
0.13745	0.128111
0.138074	0.129046
0.138698	0.13117
0.139323	0.132235
0.139947	0.133131
0.140571	0.134885
0.141196	0.135633
0.14182	0.136513
0.142444	0.136749
0.143069	0.137966
0.143693	0.139325
0.144317	0.139059
0.144942	0.138633
0.145566	0.138678
0.14619	0.137853
0.146815	0.137648
0.147439	0.137241
0.148063	0.136451
0.148688	0.136117
0.149312	0.134618
0.149937	0.134398
0.150561	0.134441
0.151185	0.133678
0.15181	0.133687
0.152434	0.133643
0.153058	0.133349
0.153683	0.133008
0.154307	0.132855
0.154931	0.133053
0.155556	0.13269
0.15618	0.132383
0.156804	0.131942
0.157429	0.131823
0.158053	0.13106
0.158677	0.130168
0.159302	0.13035
0.159926	0.13032
0.160551	0.130189
0.161175	0.13001
0.161799	0.129494
0.162424	0.129131
0.163048	0.128174
0.163672	0.127182
0.164297	0.126463
0.164921	0.12563
0.165545	0.125162
0.16617	0.124501
0.166794	0.122832
0.167418	0.121577
0.168043	0.122046
0.168667	0.121079
0.169291	0.119939
0.169916	0.118307
0.17054	0.118139
0.171164	0.117373
0.171789	0.11622
0.172413	0.115981
0.173038	0.116165
0.173662	0.116837
0.174286	0.115874
0.174911	0.11579
0.175535	0.116099
0.176159	0.115746
0.176784	0.115752
0.177408	0.115977
0.178032	0.115321
0.178657	0.115652
0.179281	0.117099
0.179905	0.116433
0.18053	0.115617
0.181154	0.115098
0.181778	0.114297
0.182403	0.11411
0.183027	0.114123
0.183651	0.114429
0.184276	0.114107
0.1849	0.11361
0.185525	0.113142
0.186149	0.113
0.186773	0.112361
0.187398	0.112166
0.188022	0.11176
0.188646	0.111381
0.189271	0.111925
0.189895	0.111556
0.190519	0.110799
0.191144	0.109931
0.191768	0.109867
0.192392	0.109212
0.193017	0.1083
0.193641	0.107125
0.194265	0.105956
0.19489	0.105401
0.195514	0.104988
0.196139	0.104444
0.196763	0.104187
0.197387	0.102759
0.198012	0.102528
0.198636	0.103372
0.19926	0.102888
0.199885	0.101783
0.200509	0.101604
0.201133	0.102182
0.201758	0.101778
0.202382	0.101455
0.203006	0.102079
0.203631	0.101375
0.204255	0.100221
0.204879	0.099325
0.205504	0.099601
0.206128	0.099195
0.206752	0.098028
0.207377	0.097734
0.208001	0.097192
0.208626	0.096441
0.20925	0.096977
0.209874	0.09651
0.210499	0.095111
0.211123	0.094947
0.211747	0.095678
0.212372	0.096182
0.212996	0.096005
0.21362	0.09489
0.214245	0.094402
0.214869	0.09373
0.215493	0.093945
0.216118	0.093655
0.216742	0.093441
0.217366	0.09328
0.217991	0.093669
0.218615	0.093761
0.219239	0.095442
0.219864	0.095998
0.220488	0.095488
0.221113	0.096278
0.221737	0.09744
0.222361	0.098775
0.222986	0.098488
0.22361	0.09929
0.224234	0.099931
0.224859	0.101208
0.225483	0.103554
0.226107	0.104874
0.226732	0.106257
0.227356	0.107376
0.22798	0.108442
0.228605	0.111942
0.229229	0.114639
0.229853	0.11713
0.230478	0.11948
0.231102	0.122925
0.231726	0.125593
0.232351	0.12738
0.232975	0.129772
0.2336	0.132616
0.234224	0.134718
0.234848	0.13924
0.235473	0.143151
0.236097	0.147395
0.236721	0.150689
0.237346	0.154258
0.23797	0.15879
0.238594	0.163143
0.239219	0.167871
0.239843	0.173058
0.240467	0.17817
0.241092	0.183979
0.241716	0.189857
0.24234	0.195641
0.242965	0.201344
0.243589	0.207668
0.244214	0.214745
0.244838	0.222815
0.245462	0.230483
0.246087	0.237639
0.246711	0.244893
0.247335	0.252339
0.24796	0.259532
0.248584	0.266967
0.249208	0.274859
0.249833	0.28275
0.250457	0.290355
0.251081	0.298795
0.251706	0.307598
0.25233	0.316392
0.252954	0.324689
0.253579	0.332819
0.254203	0.341512
0.254827	0.350519
0.255452	0.359801
0.256076	0.368601
0.256701	0.377388
0.257325	0.386672
0.257949	0.395566
0.258574	0.404441
0.259198	0.413257
0.259822	0.421005
0.260447	0.428585
0.261071	0.436579
0.261695	0.445528
0.26232	0.453894
0.262944	0.461456
0.263568	0.470084
0.264193	0.477629
0.264817	0.48636
0.265441	0.494667
0.266066	0.501867
0.26669	0.50922
0.267314	0.515838
0.267939	0.522901
0.268563	0.528964
0.269188	0.535028
0.269812	0.541088
0.270436	0.547721
0.271061	0.553635
0.271685	0.559376
0.272309	0.564601
0.272934	0.570739
0.273558	0.576358
0.274182	0.581651
0.274807	0.585657
0.275431	0.589761
0.276055	0.593004
0.27668	0.596772
0.277304	0.599713
0.277928	0.602099
0.278553	0.605478
0.279177	0.608734
0.279802	0.612182
0.280426	0.615184
0.28105	0.617634
0.281675	0.619396
0.282299	0.620513
0.282923	0.622726
0.283548	0.624441
0.284172	0.625814
0.284796	0.628472
0.285421	0.629807
0.286045	0.629991
0.286669	0.630464
0.287294	0.631516
0.287918	0.631212
0.288542	0.630771
0.289167	0.63147
0.289791	0.630798
0.290415	0.630733
0.29104	0.631318
0.291664	0.631577
0.292289	0.631288
0.292913	0.63045
0.293537	0.629669
0.294162	0.629504
0.294786	0.628391
0.29541	0.627696
0.296035	0.626754
0.296659	0.62521
0.297283	0.623962
0.297908	0.622703
0.298532	0.622008
0.299156	0.6209
0.299781	0.620373
0.300405	0.619988
0.301029	0.619227
0.301654	0.617255
0.302278	0.615444
0.302903	0.614392
0.303527	0.61373
0.304151	0.612382
0.304776	0.610261
0.3054	0.608214
0.306024	0.606763
0.306649	0.605583
0.307273	0.604629
0.307897	0.603298
0.308522	0.602499
0.309146	0.60207
0.30977	0.600476
0.310395	0.599782
0.311019	0.598575
0.311643	0.596321
0.312268	0.595052
0.312892	0.59363
0.313516	0.592784
0.314141	0.592049
0.314765	0.590491
0.31539	0.588151
0.316014	0.585023
0.316638	0.582581
0.317263	0.581484
0.317887	0.581057
0.318511	0.579421
0.319136	0.578057
0.31976	0.577038
0.320384	0.575709
0.321009	0.575032
0.321633	0.574284
0.322257	0.572453
0.322882	0.570739
0.323506	0.568345
0.32413	0.566302
0.324755	0.564739
0.325379	0.563693
0.326003	0.563281
0.326628	0.562171
0.327252	0.560447
0.327877	0.55907
0.328501	0.557183
0.329125	0.555211
0.32975	0.553179
0.330374	0.551951
0.330998	0.549998
0.331623	0.549265
0.332247	0.548201
0.332871	0.546213
0.333496	0.544453
0.33412	0.542395
0.334744	0.539625
0.335369	0.537287
0.335993	0.536401
0.336617	0.534923
0.337242	0.532427
0.337866	0.530148
0.338491	0.527843
0.339115	0.527139
0.339739	0.526042
0.340364	0.524256
0.340988	0.523414
0.341612	0.521248
0.342237	0.518952
0.342861	0.517375
0.343485	0.515248
0.34411	0.513925
0.344734	0.512539
0.345358	0.509883
0.345983	0.506639
0.346607	0.504786
0.347231	0.504011
0.347856	0.50268
0.34848	0.500531
0.349104	0.498118
0.349729	0.496748
0.350353	0.495928
0.350978	0.494508
0.351602	0.492848
0.352226	0.491192
0.352851	0.489433
0.353475	0.487687
0.354099	0.486283
0.354724	0.485234
0.355348	0.484423
0.355972	0.483387
0.356597	0.481461
0.357221	0.478769
0.357845	0.476371
0.35847	0.474395
0.359094	0.473219
0.359718	0.472425
0.360343	0.471504
0.360967	0.470161
0.361591	0.46806
0.362216	0.466349
0.36284	0.463939
0.363465	0.461746
0.364089	0.461289
0.364713	0.460858
0.365338	0.459797
0.365962	0.458782
0.366586	0.458387
0.367211	0.456999
0.367835	0.455516
0.368459	0.455035
0.369084	0.454486
0.369708	0.453414
0.370332	0.451845
0.370957	0.449974
0.371581	0.448088
0.372205	0.446397
0.37283	0.444975
0.373454	0.444602
0.374079	0.443443
0.374703	0.442373
0.375327	0.44178
0.375952	0.440828
0.376576	0.44005
0.3772	0.439981
0.377825	0.439869
0.378449	0.439413
0.379073	0.438784
0.379698	0.438413
0.380322	0.43764
0.380946	0.436318
0.381571	0.435243
0.382195	0.433791
0.382819	0.432294
0.383444	0.431307
0.384068	0.430268
0.384692	0.429133
0.385317	0.428135
0.385941	0.427383
0.386566	0.427357
0.38719	0.42687
0.387814	0.425737
0.388439	0.4254
0.389063	0.424566
0.389687	0.424804
0.390312	0.42418
0.390936	0.424598
0.39156	0.42467
0.392185	0.42431
0.392809	0.424675
0.393433	0.424613
0.394058	0.424367
0.394682	0.423498
0.395306	0.422723
0.395931	0.422172
0.396555	0.421146
0.397179	0.420776
0.397804	0.420162
0.398428	0.419568
0.399053	0.419499
0.399677	0.419423
0.400301	0.419384
0.400926	0.419085
0.40155	0.418786
0.402174	0.418514
0.402799	0.418757
0.403423	0.41843
0.404047	0.417714
0.404672	0.416899
0.405296	0.41628
0.40592	0.416333
0.406545	0.415996
0.407169	0.415154
0.407793	0.414672
0.408418	0.414723
0.409042	0.413792
0.409667	0.412251
0.410291	0.411294
0.410915	0.410885
0.41154	0.410273
0.412164	0.409792
0.412788	0.409077
0.413413	0.408799
0.414037	0.409221
0.414661	0.409035
0.415286	0.40876
0.41591	0.408203
0.416534	0.407194
0.417159	0.406813
0.417783	0.405923
0.418407	0.404271
0.419032	0.40433
0.419656	0.404874
0.42028	0.404838
0.420905	0.404301
0.421529	0.403305
0.422154	0.402339
0.422778	0.400638
0.423402	0.399085
0.424027	0.398119
0.424651	0.397245
0.425275	0.396707
0.4259	0.396171
0.426524	0.395391
0.427148	0.394322
0.427773	0.392805
0.428397	0.391501
0.429021	0.390768
0.429646	0.390287
0.43027	0.389591
0.430894	0.387857
0.431519	0.386397
0.432143	0.385535
0.432768	0.384696
0.433392	0.383627
0.434016	0.382501
0.434641	0.38125
0.435265	0.380201
0.435889	0.379435
0.436514	0.37893
0.437138	0.377626
0.437762	0.376358
0.438387	0.375838
0.439011	0.374563
0.439635	0.372675
0.44026	0.371436
0.440884	0.371185
0.441508	0.370823
0.442133	0.370326
0.442757	0.370382
0.443381	0.369881
0.444006	0.369579
0.44463	0.368984
0.445255	0.368136
0.445879	0.366999
0.446503	0.365126
0.447128	0.36449
0.447752	0.36474
0.448376	0.364727
0.449001	0.364763
0.449625	0.364355
0.450249	0.363382
0.450874	0.362511
0.451498	0.36193
0.452122	0.361433
0.452747	0.360715
0.453371	0.359338
0.453995	0.357975
0.45462	0.357944
0.455244	0.357765
0.455868	0.357205
0.456493	0.357139
0.457117	0.356124
0.457742	0.355645
0.458366	0.355288
0.45899	0.355074
0.459615	0.355383
0.460239	0.354462
0.460863	0.353224
0.461488	0.352127
0.462112	0.35123
0.462736	0.350646
0.463361	0.349137
0.463985	0.347589
0.464609	0.346467
0.465234	0.34561
0.465858	0.345584
0.466482	0.345447
0.467107	0.34503
0.467731	0.344578
0.468356	0.344686
0.46898	0.345133
0.469604	0.34491
0.470229	0.344751
0.470853	0.344616
0.471477	0.344747
0.472102	0.344221
0.472726	0.343288
0.47335	0.342232
0.473975	0.341437
0.474599	0.340563
0.475223	0.339338
0.475848	0.338697
0.476472	0.338012
0.477096	0.33709
0.477721	0.336701
0.478345	0.336299
0.478969	0.335291
0.479594	0.333754
0.480218	0.332115
0.480843	0.33137
0.481467	0.330491
0.482091	0.329416
0.482716	0.328601
0.48334	0.327379
0.483964	0.325654
0.484589	0.32451
0.485213	0.324272
0.485837	0.323394
0.486462	0.321891
0.487086	0.31992
0.48771	0.318898
0.488335	0.3188
0.488959	0.317881
0.489583	0.317422
0.490208	0.31726
0.490832	0.316515
0.491456	0.315812
0.492081	0.315495
0.492705	0.315663
0.49333	0.315946
0.493954	0.315466
0.494578	0.31569
0.495203	0.315923
0.495827	0.315172
0.496451	0.314328
0.497076	0.313837
0.4977	0.313149
0.498324	0.312481
0.498949	0.311734
0.499573	0.310048
0.500197	0.308551
0.500822	0.307486
0.501446	0.306831
0.50207	0.305793
0.502695	0.304345
0.503319	0.303444
0.503943	0.303039
0.504568	0.302744
0.505192	0.302089
0.505817	0.301044
0.506441	0.301326
0.507065	0.300365
0.50769	0.299501
0.508314	0.299183
0.508938	0.299246
0.509563	0.299117
0.510187	0.299111
0.510811	0.299276
0.511436	0.299689
0.51206	0.299068
0.512684	0.298336
0.513309	0.297206
0.513933	0.296191
0.514557	0.295898
0.515182	0.296915
0.515806	0.297447
0.51643	0.296282
0.517055	0.295182
0.517679	0.295036
0.518304	0.294966
0.518928	0.294342
0.519552	0.293139
0.520177	0.292361
0.520801	0.291524
0.521425	0.290886
0.52205	0.289756
0.522674	0.28868
0.523298	0.287995
0.523923	0.286396
0.524547	0.285366
0.525171	0.284875
0.525796	0.285424
0.52642	0.284677
0.527044	0.283879
0.527669	0.283344
0.528293	0.28281
0.528917	0.282417
0.529542	0.282107
0.530166	0.281185
0.530791	0.280928
0.531415	0.280149
0.532039	0.279256
0.532664	0.278635
0.533288	0.278566
0.533912	0.278759
0.534537	0.278346
0.535161	0.277427
0.535785	0.277313
0.53641	0.276984
0.537034	0.275929
0.537658	0.275186
0.538283	0.275051
0.538907	0.274294
0.539531	0.273453
0.540156	0.272891
0.54078	0.272336
0.541405	0.271395
0.542029	0.270203
0.542653	0.268684
0.543278	0.267364
0.543902	0.267562
0.544526	0.267581
0.545151	0.267026
0.545775	0.266461
0.546399	0.26568
0.547024	0.265092
0.547648	0.264982
0.548272	0.265146
0.548897	0.264312
0.549521	0.263319
0.550145	0.26242
0.55077	0.261892
0.551394	0.261933
0.552018	0.261695
0.552643	0.26126
0.553267	0.261683
0.553892	0.261576
0.554516	0.261027
0.55514	0.260705
0.555765	0.260225
0.556389	0.259905
0.557013	0.259076
0.557638	0.258633
0.558262	0.259061
0.558886	0.258982
0.559511	0.257636
0.560135	0.257767
0.560759	0.257084
0.561384	0.257464
0.562008	0.256828
0.562632	0.256944
0.563257	0.257377
0.563881	0.2572
0.564506	0.256759
0.56513	0.256503
0.565754	0.255891
0.566379	0.2558
0.567003	0.25509
0.567627	0.253993
0.568252	0.253565
0.568876	0.253561
0.5695	0.251942
0.570125	0.251216
0.570749	0.251121
0.571373	0.250805
0.571998	0.250194
0.572622	0.249618
0.573246	0.249396
0.573871	0.248774
0.574495	0.248198
0.575119	0.246639
0.575744	0.245621
0.576368	0.245306
0.576993	0.244933
0.577617	0.244741
0.578241	0.244136
0.578866	0.244066
0.57949	0.242862
0.580114	0.242155
0.580739	0.242262
0.581363	0.242831
0.581987	0.242295
0.582612	0.241696
0.583236	0.240344
0.58386	0.239403
0.584485	0.238844
0.585109	0.238314
0.585733	0.238096
0.586358	0.237967
0.586982	0.237213
0.587606	0.235805
0.588231	0.234495
0.588855	0.234097
0.58948	0.233144
0.590104	0.232947
0.590728	0.232698
0.591353	0.23187
0.591977	0.23153
0.592601	0.230538
0.593226	0.229944
0.59385	0.228729
0.594474	0.227605
0.595099	0.227109
0.595723	0.226447
0.596347	0.226162
0.596972	0.226113
0.597596	0.225664
0.59822	0.225156
0.598845	0.224912
0.599469	0.224458
0.600093	0.223745
0.600718	0.223844
0.601342	0.223709
0.601967	0.223125
0.602591	0.222435
0.603215	0.221871
0.60384	0.220987
0.604464	0.220006
0.605088	0.220017
0.605713	0.220319
0.606337	0.220418
0.606961	0.220265
0.607586	0.219523
0.60821	0.217978
0.608834	0.216839
0.609459	0.215969
0.610083	0.215701
0.610707	0.215485
0.611332	0.215349
0.611956	0.215707
0.612581	0.213876
0.613205	0.214243
0.613829	0.213788
0.614454	0.214147
0.615078	0.213647
0.615702	0.212769
0.616327	0.212223
0.616951	0.212971
0.617575	0.211582
0.6182	0.211105
0.618824	0.210959
0.619448	0.210183
0.620073	0.208618
0.620697	0.207503
0.621321	0.20611
0.621946	0.205573
0.62257	0.204806
0.623195	0.204435
0.623819	0.203771
0.624443	0.202744
0.625068	0.202501
0.625692	0.202921
0.626316	0.202119
0.626941	0.201769
0.627565	0.200786
0.628189	0.200339
0.628814	0.199253
0.629438	0.198249
0.630062	0.197778
0.630687	0.197366
0.631311	0.196987
0.631935	0.196227
0.63256	0.195473
0.633184	0.195341
0.633808	0.195261
0.634433	0.194936
0.635057	0.194581
0.635682	0.194487
0.636306	0.194181
0.63693	0.194167
0.637555	0.194048
0.638179	0.194118
0.638803	0.193748
0.639428	0.194019
0.640052	0.193493
0.640676	0.193225
0.641301	0.192606
0.641925	0.192538
0.642549	0.192025
0.643174	0.19124
0.643798	0.191637
0.644422	0.191167
0.645047	0.190117
0.645671	0.189407
0.646295	0.189637
0.64692	0.188844
0.647544	0.187243
0.648169	0.186652
0.648793	0.18678
0.649417	0.18685
0.650042	0.186468
0.650666	0.186389
0.65129	0.186579
0.651915	0.186643
0.652539	0.186515
0.653163	0.18635
0.653788	0.185387
0.654412	0.184534
0.655036	0.184606
0.655661	0.185109
0.656285	0.184548
0.656909	0.183817
0.657534	0.183285
0.658158	0.183372
0.658782	0.183344
0.659407	0.182955
0.660031	0.182863
0.660656	0.18229
0.66128	0.181973
0.661904	0.181452
0.662529	0.181315
0.663153	0.181924
0.663777	0.181925
0.664402	0.181201
0.665026	0.180681
0.66565	0.180093
0.666275	0.18034
0.666899	0.180356
0.667523	0.180219
0.668148	0.179517
0.668772	0.178721
0.669396	0.177715
0.670021	0.177557
0.670645	0.177769
0.67127	0.177652
0.671894	0.178037
0.672518	0.178448
0.673143	0.17722
0.673767	0.177245
0.674391	0.17676
0.675016	0.176029
0.67564	0.17535
0.676264	0.175806
0.676889	0.175438
0.677513	0.175068
0.678137	0.174834
0.678762	0.17626
0.679386	0.176539
0.68001	0.176453
0.680635	0.175871
0.681259	0.175671
0.681883	0.175193
0.682508	0.175512
0.683132	0.175963
0.683757	0.176671
0.684381	0.177302
0.685005	0.177502
0.68563	0.178316
0.686254	0.177474
0.686878	0.176927
0.687503	0.176742
0.688127	0.175948
0.688751	0.17617
0.689376	0.174968
0.69	0.173887
0.690624	0.173257
0.691249	0.173307
0.691873	0.173653
0.692497	0.173437
0.693122	0.17252
0.693746	0.172121
0.694371	0.171345
0.694995	0.170486
0.695619	0.170885
0.696244	0.170449
0.696868	0.170351
0.697492	0.169508
0.698117	0.16935
0.698741	0.168954
0.699365	0.168758
0.69999	0.168196
0.700614	0.167568
0.701238	0.167066
0.701863	0.16717
0.702487	0.166756
0.703111	0.165483
0.703736	0.164865
0.70436	0.164802
0.704984	0.16491
0.705609	0.164668
0.706233	0.163861
0.706858	0.162825
0.707482	0.162248
0.708106	0.162155
0.708731	0.162092
0.709355	0.16254
0.709979	0.161509
0.710604	0.16032
0.711228	0.159929
0.711852	0.159166
0.712477	0.159436
0.713101	0.159751
0.713725	0.159159
0.71435	0.159084
0.714974	0.1579
0.715598	0.157063
0.716223	0.156734
0.716847	0.155562
0.717471	0.155289
0.718096	0.154244
0.71872	0.153999
0.719345	0.154126
0.719969	0.153593
0.720593	0.15436
0.721218	0.154282
0.721842	0.154078
0.722466	0.154327
0.723091	0.154753
0.723715	0.154031
0.724339	0.154219
0.724964	0.154081
0.725588	0.153771
0.726212	0.153661
0.726837	0.152481
0.727461	0.151134
0.728085	0.150796
0.72871	0.150592
0.729334	0.150327
0.729958	0.150031
0.730583	0.149294
0.731207	0.149563
0.731832	0.149188
0.732456	0.149022
0.73308	0.147452
0.733705	0.146796
0.734329	0.147482
0.734953	0.146443
0.735578	0.146189
0.736202	0.145533
0.736826	0.14561
0.737451	0.145837
0.738075	0.145781
0.738699	0.145807
0.739324	0.145604
0.739948	0.144701
0.740572	0.143826
0.741197	0.142928
0.741821	0.143234
0.742446	0.142274
0.74307	0.143039
0.743694	0.14282
0.744319	0.141985
0.744943	0.141665
0.745567	0.141164
0.746192	0.141454
0.746816	0.141222
0.74744	0.140036
0.748065	0.140577
0.748689	0.141274
0.749313	0.141439
0.749938	0.141029
0.750562	0.140672
0.751186	0.140388
0.751811	0.139983
0.752435	0.139858
0.75306	0.139867
0.753684	0.138642
0.754308	0.137195
0.754933	0.137075
0.755557	0.137296
0.756181	0.137163
0.756806	0.137337
0.75743	0.13753
0.758054	0.137511
0.758679	0.138374
0.759303	0.137754
0.759927	0.138101
0.760552	0.137585
0.761176	0.137574
0.7618	0.137218
0.762425	0.137339
0.763049	0.137113
0.763673	0.136693
0.764298	0.136719
0.764922	0.137064
0.765547	0.136812
0.766171	0.136964
0.766795	0.136899
0.76742	0.136404
0.768044	0.136162
0.768668	0.136072
0.769293	0.137028
0.769917	0.137088
0.770541	0.137257
0.771166	0.136995
0.77179	0.136839
0.772414	0.136713
0.773039	0.136038
0.773663	0.136579
0.774287	0.136212
0.774912	0.135559
0.775536	0.135232
0.77616	0.135015
0.776785	0.134811
0.777409	0.134859
0.778033	0.134104
0.778658	0.134226
0.779282	0.13356
0.779907	0.132372
0.780531	0.132301
0.781155	0.133438
0.78178	0.132998
0.782404	0.132991
0.783028	0.132028
0.783653	0.132432
0.784277	0.132202
0.784901	0.132505
0.785526	0.133156
0.78615	0.133508
0.786774	0.133086
0.787399	0.132601
0.788023	0.132088
0.788647	0.131034
0.789272	0.131299
0.789896	0.13176
0.790521	0.131237
0.791145	0.130656
0.791769	0.130239
0.792394	0.130297
0.793018	0.130145
0.793642	0.129838
0.794267	0.130931
0.794891	0.131023
0.795515	0.131133
0.79614	0.129955
0.796764	0.129591
0.797388	0.129417
0.798013	0.128853
0.798637	0.12897
0.799261	0.128916
0.799886	0.129207
0.80051	0.128509
0.801135	0.127899
0.801759	0.126604
0.802383	0.126741
0.803008	0.126059
0.803632	0.126217
0.804256	0.125063
0.804881	0.124768
0.805505	0.124488
0.806129	0.123637
0.806754	0.123891
0.807378	0.123137
0.808002	0.122929
0.808627	0.123075
0.809251	0.124398
0.809875	0.125358
0.8105	0.124848
0.811124	0.125795
0.811748	0.124568
0.812373	0.123698
0.812997	0.123882
0.813622	0.123976
0.814246	0.123236
0.81487	0.121823
0.815495	0.121114
0.816119	0.120894
0.816743	0.120514
0.817368	0.120019
0.817992	0.119423
0.818616	0.119155
0.819241	0.118873
0.819865	0.11942
0.820489	0.118966
0.821114	0.118736
0.821738	0.118202
0.822362	0.118163
0.822987	0.118524
0.823611	0.118299
0.824235	0.118455
0.82486	0.118098
0.825484	0.117814
0.826109	0.11808
0.826733	0.118006
0.827357	0.118217
0.827982	0.118242
0.828606	0.118405
0.82923	0.118714
0.829855	0.118598
0.830479	0.118217
0.831103	0.118207
0.831728	0.118256
0.832352	0.117836
0.832976	0.118129
0.833601	0.118491
0.834225	0.118733
0.834849	0.119019
0.835474	0.119818
0.836098	0.119371
0.836722	0.119382
0.837347	0.119963
0.837971	0.12031
0.838596	0.121081
0.83922	0.120422
0.839844	0.119221
0.840469	0.118473
0.841093	0.117607
0.841717	0.117867
0.842342	0.117372
0.842966	0.117957
0.84359	0.11803
0.844215	0.117877
0.844839	0.117875
0.845463	0.118039
0.846088	0.118581
0.846712	0.118982
0.847336	0.118401
0.847961	0.117924
0.848585	0.117354
0.84921	0.117853
0.849834	0.117682
0.850458	0.117438
0.851083	0.117703
0.851707	0.117226
0.852331	0.116681
0.852956	0.117764
0.85358	0.117314
0.854204	0.116693
0.854829	0.116102
0.855453	0.115943
0.856077	0.11595
0.856702	0.114715
0.857326	0.114552
0.85795	0.114384
0.858575	0.113858
0.859199	0.112845
0.859823	0.112789
0.860448	0.112816
0.861072	0.112658
0.861697	0.112452
0.862321	0.11201
0.862945	0.111329
0.86357	0.111366
0.864194	0.111118
0.864818	0.109662
0.865443	0.108746
0.866067	0.108725
0.866691	0.108754
0.867316	0.109004
0.86794	0.108965
0.868564	0.108388
0.869189	0.108304
0.869813	0.107366
0.870437	0.107259
0.871062	0.106938
0.871686	0.106283
0.872311	0.106147
0.872935	0.105942
0.873559	0.104835
0.874184	0.105047
0.874808	0.10479
0.875432	0.105399
0.876057	0.104546
0.876681	0.104246
0.877305	0.103879
0.87793	0.103565
0.878554	0.103281
0.879178	0.103724
0.879803	0.104179
0.880427	0.104215
0.881051	0.104367
0.881676	0.103724
0.8823	0.103172
0.882924	0.103514
0.883549	0.103055
0.884173	0.102387
0.884798	0.102628
0.885422	0.102942
0.886046	0.102896
0.886671	0.1027
0.887295	0.102316
0.887919	0.102518
0.888544	0.101919
0.889168	0.101775
0.889792	0.102491
0.890417	0.103139
0.891041	0.103623
0.891665	0.104087
0.89229	0.104818
0.892914	0.104545
0.893538	0.104018
0.894163	0.104103
0.894787	0.10484
0.895411	0.105812
0.896036	0.106746
0.89666	0.107351
0.897285	0.107036
0.897909	0.107022
0.898533	0.107025
0.899158	0.106706
0.899782	0.107231
0.900406	0.107983
0.901031	0.108402
0.901655	0.108495
0.902279	0.108612
0.902904	0.108904
0.903528	0.108736
0.904152	0.108187
0.904777	0.10862
0.905401	0.10844
0.906025	0.107725
0.90665	0.106726
0.907274	0.107164
0.907898	0.107648
0.908523	0.107508
0.909147	0.10738
0.909772	0.107414
0.910396	0.107298
0.91102	0.107543
0.911645	0.107264
0.912269	0.10747
0.912893	0.108557
0.913518	0.10828
0.914142	0.107524
0.914766	0.108347
0.915391	0.107961
0.916015	0.106527
0.916639	0.106076
0.917264	0.106291
0.917888	0.106447
0.918512	0.106366
0.919137	0.105395
0.919761	0.104961
0.920386	0.104118
0.92101	0.103473
0.921634	0.103086
0.922259	0.102115
0.922883	0.101519
0.923507	0.100599
0.924132	0.101286
0.924756	0.101168
0.92538	0.100928
0.926005	0.100046
0.926629	0.099236
0.927253	0.099085
0.927878	0.098878
0.928502	0.098847
0.929126	0.098094
0.929751	0.097721
0.930375	0.097481
0.931	0.097416
0.931624	0.09675
0.932248	0.096789
0.932873	0.096807
0.933497	0.096685
0.934121	0.096288
0.934746	0.0961
0.93537	0.096487
0.935994	0.097018
0.936619	0.097027
0.937243	0.097228
0.937867	0.097511
0.938492	0.096948
0.939116	0.096491
0.93974	0.096267
0.940365	0.096153
0.940989	0.095938
0.941613	0.095174
0.942238	0.095018
0.942862	0.095392
0.943487	0.095156
0.944111	0.094536
0.944735	0.094373
0.94536	0.094725
0.945984	0.094492
0.946608	0.094429
0.947233	0.095355
0.947857	0.095443
0.948481	0.094539
0.949106	0.094346
0.94973	0.094552
0.950354	0.094834
0.950979	0.094909
0.951603	0.095579
0.952227	0.095721
0.952852	0.095626
0.953476	0.095786
0.9541	0.095333
0.954725	0.09474
0.955349	0.094047
0.955974	0.09363
0.956598	0.0933
0.957222	0.093448
0.957847	0.093055
0.958471	0.09298
0.959095	0.093321
0.95972	0.093678
0.960344	0.094056
0.960968	0.094288
0.961593	0.093851
0.962217	0.093021
0.962841	0.092567
0.963466	0.093274
0.96409	0.093636
0.964714	0.093678
0.965339	0.093916
0.965963	0.093991
0.966587	0.09371
0.967212	0.092963
0.967836	0.093313
0.968461	0.093635
0.969085	0.093444
0.969709	0.093941
0.970334	0.094584
0.970958	0.095639
0.971582	0.095163
0.972207	0.095606
0.972831	0.096655
0.973455	0.095803
0.97408	0.095127
0.974704	0.095342
0.975328	0.09595
0.975953	0.095715
0.976577	0.095516
0.977201	0.095404
0.977826	0.09551
0.97845	0.095729
0.979075	0.096553
0.979699	0.097565
0.980323	0.097906
0.980948	0.098505
0.981572	0.098959
0.982196	0.099605
0.982821	0.099221
0.983445	0.0991
0.984069	0.099686
0.984694	0.099399
0.985318	0.099595
0.985942	0.099577
0.986567	0.099345
0.987191	0.099519
0.987815	0.099805
0.98844	0.099919
0.989064	0.100163
0.989689	0.100327
0.990313	0.100508
0.990937	0.100827
0.991562	0.100528
0.992186	0.100417
0.99281	0.100996
0.993435	0.101579
0.994059	0.101544
0.994683	0.100641
0.995308	0.099799
0.995932	0.099711
0.996556	0.099346
0.997181	0.098561
0.997805	0.098165
0.998429	0.098337
0.999054	0.098142
0.999678	0.09731
1.0003	0.096843
1.00093	0.096358
1.00155	0.095298
1.00218	0.094664
1.0028	0.095237
1.00342	0.095552
1.00405	0.09453
1.00467	0.094209
1.0053	0.094618
1.00592	0.094913
1.00655	0.094799
1.00717	0.094585
1.00779	0.094655
1.00842	0.095005
1.00904	0.095436
1.00967	0.094783
1.01029	0.094034
1.01092	0.093271
1.01154	0.092659
1.01216	0.092398
1.01279	0.092371
1.01341	0.091687
1.01404	0.091135
1.01466	0.090876
1.01529	0.090177
1.01591	0.09032
1.01654	0.090066
1.01716	0.089434
1.01778	0.089193
1.01841	0.089401
1.01903	0.089611
1.01966	0.089194
1.02028	0.088395
1.02091	0.087924
1.02153	0.0875
1.02215	0.086567
1.02278	0.085712
1.0234	0.085273
1.02403	0.08478
1.02465	0.084827
1.02528	0.085031
1.0259	0.085308
1.02652	0.085634
1.02715	0.085654
1.02777	0.085536
1.0284	0.085414
1.02902	0.085053
1.02965	0.084729
1.03027	0.084123
1.0309	0.084219
1.03152	0.084771
1.03214	0.085064
1.03277	0.085586
1.03339	0.085425
1.03402	0.084366
1.03464	0.083908
1.03527	0.08435
1.03589	0.084708
1.03652	0.084681
1.03714	0.084076
1.03776	0.084002
1.03839	0.083931
1.03901	0.083932
1.03964	0.084241
1.04026	0.084497
1.04089	0.084746
1.04151	0.085293
1.04213	0.08541
1.04276	0.085646
1.04338	0.085106
1.04401	0.084789
1.04463	0.084892
1.04526	0.085208
1.04588	0.085105
1.0465	0.085529
1.04713	0.084887
1.04775	0.084753
1.04838	0.086445
1.049	0.087566
1.04963	0.087884
1.05025	0.087752
1.05088	0.088183
1.0515	0.088531
1.05212	0.089354
1.05275	0.090049
1.05337	0.090353
1.054	0.09111
1.05462	0.091735
1.05524	0.091338
1.05587	0.090501
1.05649	0.089491
1.05712	0.088664
1.05774	0.087789
1.05837	0.087142
1.05899	0.086851
1.05962	0.087533
1.06024	0.088194
1.06086	0.087992
1.06149	0.087719
1.06211	0.088664
1.06274	0.089237
1.06336	0.089034
1.06399	0.089155
1.06461	0.089156
1.06523	0.089325
1.06586	0.089688
1.06648	0.089779
1.06711	0.089792
1.06773	0.089632
1.06836	0.089622
1.06898	0.08944
1.0696	0.08938
1.07023	0.089133
1.07085	0.088461
1.07148	0.088014
1.0721	0.088299
1.07273	0.088796
1.07335	0.088594
1.07398	0.088511
1.0746	0.088396
1.07523	0.087782
1.07585	0.087553
1.07647	0.087949
1.0771	0.087744
1.07772	0.087579
1.07835	0.087545
1.07897	0.086826
1.0796	0.085912
1.08022	0.085387
1.08084	0.085108
1.08147	0.08452
1.08209	0.083957
1.08272	0.083967
1.08334	0.083223
1.08397	0.081705
1.08459	0.080949
1.08521	0.080396
1.08584	0.079569
1.08646	0.079729
1.08709	0.080005
1.08771	0.080493
1.08834	0.081465
1.08896	0.081639
1.08959	0.081689
1.09021	0.082112
1.09083	0.082092
1.09146	0.08151
1.09208	0.081416
1.09271	0.081874
1.09333	0.0815
1.09396	0.079893
1.09458	0.080011
1.0952	0.079018
1.09583	0.078582
1.09645	0.078551
1.09708	0.078281
1.0977	0.077824
1.09832	0.07744
1.09895	0.076997
1.09957	0.076257
1.1002	0.075922
1.10082	0.074861
1.10145	0.074125
1.10207	0.073256
1.1027	0.072274
1.10332	0.07162
1.10394	0.070475
1.10457	0.069882
1.10519	0.069139
1.10582	0.068715
1.10644	0.068463
1.10707	0.068701
1.10769	0.068595
1.10831	0.068932
1.10894	0.068843
1.10956	0.068508
1.11019	0.069249
1.11081	0.068683
1.11144	0.068185
1.11206	0.067952
1.11269	0.068241
1.11331	0.068061
1.11393	0.067987
1.11456	0.067317
1.11518	0.067096
1.11581	0.067297
1.11643	0.067719
1.11706	0.068507
1.11768	0.068891
1.11831	0.069002
1.11893	0.069506
1.11955	0.069188
1.12018	0.069232
1.1208	0.069825
1.12143	0.069711
1.12205	0.068753
1.12268	0.069145
1.1233	0.070011
1.12392	0.069632
1.12455	0.06961
1.12517	0.069571
1.1258	0.069475
1.12642	0.07044
1.12705	0.070573
1.12767	0.070963
1.12829	0.071658
1.12892	0.071429
1.12954	0.070512
1.13017	0.070204
1.13079	0.069973
1.13142	0.070212
1.13204	0.071447
1.13267	0.071967
1.13329	0.071872
1.13391	0.07195
1.13454	0.072518
1.13516	0.072663
1.13579	0.072562
1.13641	0.072297
1.13704	0.071217
1.13766	0.070743
1.13828	0.070528
1.13891	0.069893
1.13953	0.06915
1.14016	0.06877
1.14078	0.068318
1.14141	0.067586
1.14203	0.067354
1.14265	0.067772
1.14328	0.067662
1.1439	0.067388
1.14453	0.067418
1.14515	0.067501
1.14578	0.067883
1.1464	0.06824
1.14702	0.068254
1.14765	0.067944
1.14827	0.067687
1.1489	0.067259
1.14952	0.067113
1.15015	0.066299
1.15077	0.066084
1.15139	0.065239
1.15202	0.064499
1.15264	0.064329
1.15327	0.064785
1.15389	0.064004
1.15452	0.063054
1.15514	0.062994
1.15577	0.062229
1.15639	0.061998
1.15701	0.0619
1.15764	0.061477
1.15826	0.061097
1.15889	0.060558
1.15951	0.060046
1.16014	0.059931
1.16076	0.060061
1.16138	0.060515
1.16201	0.061332
1.16263	0.061552
1.16326	0.061398
1.16388	0.061341
1.16451	0.061682
1.16513	0.061753
1.16576	0.061383
1.16638	0.061514
1.167	0.061724
1.16763	0.061589
1.16825	0.062507
1.16888	0.063255
1.1695	0.062884
1.17013	0.06286
1.17075	0.062997
1.17138	0.063783
1.172	0.06456
1.17262	0.065344
1.17325	0.065638
1.17387	0.065763
1.1745	0.064895
1.17512	0.064858
1.17575	0.064425
1.17637	0.063819
1.17699	0.063455
1.17762	0.063854
1.17824	0.063711
1.17887	0.063305
1.17949	0.062546
1.18012	0.062882
1.18074	0.062882
1.18136	0.063001
1.18199	0.062405
1.18261	0.062537
1.18324	0.062794
1.18386	0.062443
1.18449	0.062079
1.18511	0.062209
1.18573	0.062062
1.18636	0.062076
1.18698	0.062525
1.18761	0.062739
1.18823	0.062915
1.18886	0.063013
1.18948	0.062762
1.1901	0.062221
1.19073	0.062161
1.19135	0.06252
1.19198	0.062684
1.1926	0.062553
1.19323	0.062401
1.19385	0.061963
1.19448	0.060874
1.1951	0.060459
1.19572	0.060394
1.19635	0.060049
1.19697	0.059761
1.1976	0.059363
1.19822	0.059479
1.19885	0.059577
1.19947	0.059119
1.20009	0.059297
1.20072	0.059826
1.20134	0.059966
1.20197	0.059428
1.20259	0.059419
1.20322	0.059123
1.20384	0.058829
1.20446	0.059274
1.20509	0.058433
1.20571	0.058409
1.20634	0.057987
1.20696	0.058477
1.20759	0.059489
1.20821	0.060781
1.20884	0.060898
1.20946	0.061332
1.21008	0.061259
1.21071	0.061542
1.21133	0.060483
1.21196	0.060287
1.21258	0.059776
1.21321	0.060276
1.21383	0.060214
1.21446	0.061057
1.21508	0.061775
1.2157	0.062055
1.21633	0.062834
1.21695	0.063726
1.21758	0.06377
1.2182	0.063972
1.21883	0.06332
1.21945	0.063024
1.22007	0.061895
1.2207	0.061943
1.22132	0.062805
1.22195	0.062838
1.22257	0.062491
1.2232	0.062276
1.22382	0.06204
1.22444	0.061548
1.22507	0.061535
1.22569	0.061157
1.22632	0.06097
1.22694	0.060934
1.22757	0.060354
1.22819	0.060436
1.22881	0.060387
1.22944	0.060108
1.23006	0.060469
1.23069	0.060529
1.23131	0.060169
1.23194	0.059062
1.23256	0.058444
1.23318	0.057737
1.23381	0.05725
1.23443	0.057281
[truncated: 48,122 more rows]

## Sheet: S6b
Volume (mL)	Absorbance (mAU)
-0.01326	0
-0.01263	-0.03458
-0.01201	-0.03341
-0.01139	-0.03225
-0.01076	-0.03162
-0.01014	-0.03058
-0.00951	-0.02964
-0.00889	-0.02888
-0.00826	-0.02785
-0.00764	-0.02717
-0.00702	-0.02613
-0.00639	-0.0249
-0.00577	-0.02392
-0.00514	-0.02323
-0.00452	-0.02284
-0.0039	-0.02096
-0.00327	-0.01865
-0.00265	-0.01736
-0.00202	-0.01578
-0.0014	-0.01392
-0.00078	-0.01199
-0.00015	-0.00273
0.000473	0.031787
0.001098	0.034539
0.001722	0.037918
0.002346	0.041341
0.00297	0.042878
0.003594	0.044518
0.004218	0.046784
0.004842	0.049124
0.005466	0.051566
0.006091	0.054034
0.006715	0.057044
0.007339	0.058959
0.007963	0.062134
0.008587	0.065086
0.009211	0.067945
0.009835	0.071204
0.01046	0.073276
0.011084	0.076032
0.011708	0.079649
0.012332	0.083167
0.012956	0.08713
0.01358	0.090149
0.014204	0.093087
0.014828	0.094871
0.015453	0.098113
0.016077	0.100188
0.016701	0.10202
0.017325	0.105408
0.017949	0.10726
0.018573	0.109451
0.019197	0.111925
0.019822	0.114504
0.020446	0.116289
0.02107	0.118734
0.021694	0.121527
0.022318	0.123297
0.022942	0.12514
0.023566	0.128259
0.02419	0.131079
0.024815	0.13362
0.025439	0.134212
0.026063	0.135036
0.026687	0.135108
0.027311	0.134602
0.027935	0.134699
0.028559	0.134468
0.029184	0.13441
0.029808	0.134567
0.030432	0.134929
0.031056	0.136692
0.03168	0.137689
0.032304	0.138849
0.032928	0.139462
0.033552	0.139229
0.034177	0.141001
0.034801	0.141442
0.035425	0.141429
0.036049	0.140885
0.036673	0.142108
0.037297	0.141607
0.037921	0.141476
0.038545	0.141462
0.03917	0.14233
0.039794	0.141962
0.040418	0.141531
0.041042	0.142368
0.041666	0.14263
0.04229	0.142509
0.042914	0.142542
0.043539	0.142262
0.044163	0.141919
0.044787	0.141737
0.045411	0.142467
0.046035	0.143831
0.046659	0.144363
0.047283	0.145104
0.047907	0.146627
0.048532	0.146527
0.049156	0.146919
0.04978	0.146649
0.050404	0.14679
0.051028	0.147223
0.051652	0.147739
0.052276	0.147907
0.052901	0.148004
0.053525	0.149439
0.054149	0.149566
0.054773	0.149407
0.055397	0.149185
0.056021	0.148631
0.056645	0.148998
0.057269	0.149065
0.057894	0.149885
0.058518	0.150082
0.059142	0.150545
0.059766	0.15151
0.06039	0.152252
0.061014	0.15285
0.061638	0.153258
0.062263	0.152893
0.062887	0.15191
0.063511	0.152332
0.064135	0.153347
0.064759	0.154536
0.065383	0.154846
0.066007	0.154588
0.066631	0.155121
0.067256	0.156702
0.06788	0.156735
0.068504	0.157853
0.069128	0.158771
0.069752	0.159945
0.070376	0.160045
0.071	0.160959
0.071625	0.162428
0.072249	0.16345
0.072873	0.164372
0.073497	0.165247
0.074121	0.166036
0.074745	0.166609
0.075369	0.167189
0.075993	0.16792
0.076618	0.167805
0.077242	0.167193
0.077866	0.167564
0.07849	0.16803
0.079114	0.168658
0.079738	0.169682
0.080362	0.170638
0.080987	0.172349
0.081611	0.172614
0.082235	0.1727
0.082859	0.173693
0.083483	0.175265
0.084107	0.176229
0.084731	0.176227
0.085355	0.177172
0.08598	0.178222
0.086604	0.179432
0.087228	0.180106
0.087852	0.180138
0.088476	0.180504
0.0891	0.181276
0.089724	0.182496
0.090349	0.183333
0.090973	0.183448
0.091597	0.183057
0.092221	0.183128
0.092845	0.183057
0.093469	0.183375
0.094093	0.184087
0.094717	0.183807
0.095342	0.182634
0.095966	0.182348
0.09659	0.182411
0.097214	0.183067
0.097838	0.183204
0.098462	0.182675
0.099086	0.182375
0.099711	0.182272
0.100335	0.182726
0.100959	0.183055
0.101583	0.182552
0.102207	0.182149
0.102831	0.18146
0.103455	0.180251
0.104079	0.180145
0.104704	0.179594
0.105328	0.178371
0.105952	0.177744
0.106576	0.177719
0.1072	0.177398
0.107824	0.176887
0.108448	0.176546
0.109073	0.176124
0.109697	0.17604
0.110321	0.175957
0.110945	0.175292
0.111569	0.173561
0.112193	0.172187
0.112817	0.171613
0.113441	0.171781
0.114066	0.171251
0.11469	0.169677
0.115314	0.168566
0.115938	0.16788
0.116562	0.167083
0.117186	0.166042
0.11781	0.164833
0.118435	0.164662
0.119059	0.165103
0.119683	0.165402
0.120307	0.165334
0.120931	0.165195
0.121555	0.165296
0.122179	0.165796
0.122803	0.166251
0.123428	0.165706
0.124052	0.165015
0.124676	0.164778
0.1253	0.164432
0.125924	0.163576
0.126548	0.163217
0.127172	0.162918
0.127797	0.162578
0.128421	0.162575
0.129045	0.163004
0.129669	0.163122
0.130293	0.162885
0.130917	0.162146
0.131541	0.161023
0.132165	0.15998
0.13279	0.159793
0.133414	0.160135
0.134038	0.160715
0.134662	0.160622
0.135286	0.159526
0.13591	0.15962
0.136534	0.16035
0.137159	0.161114
0.137783	0.161529
0.138407	0.161825
0.139031	0.162137
0.139655	0.162639
0.140279	0.163174
0.140903	0.163977
0.141527	0.164615
0.142152	0.165043
0.142776	0.166154
0.1434	0.166958
0.144024	0.167919
0.144648	0.168565
0.145272	0.168967
0.145896	0.170016
0.146521	0.170539
0.147145	0.170758
0.147769	0.171167
0.148393	0.171869
0.149017	0.173007
0.149641	0.173523
0.150265	0.17352
0.150889	0.173434
0.151514	0.173328
0.152138	0.173476
0.152762	0.173468
0.153386	0.173309
0.15401	0.173056
0.154634	0.172978
0.155258	0.17335
0.155883	0.174055
0.156507	0.17422
0.157131	0.174908
0.157755	0.17556
0.158379	0.175396
0.159003	0.175276
0.159627	0.17475
0.160251	0.173646
0.160876	0.173422
0.1615	0.173654
0.162124	0.173974
0.162748	0.174026
0.163372	0.173657
0.163996	0.173276
0.16462	0.172283
0.165245	0.171379
0.165869	0.170793
0.166493	0.170368
0.167117	0.169578
0.167741	0.168651
0.168365	0.167416
0.168989	0.165513
0.169613	0.163584
0.170238	0.162209
0.170862	0.160814
0.171486	0.158859
0.17211	0.156282
0.172734	0.153731
0.173358	0.151821
0.173982	0.150027
0.174607	0.148187
0.175231	0.146549
0.175855	0.144546
0.176479	0.142385
0.177103	0.140235
0.177727	0.138295
0.178351	0.136167
0.178975	0.134272
0.1796	0.13257
0.180224	0.130053
0.180848	0.127738
0.181472	0.125534
0.182096	0.123125
0.18272	0.120894
0.183344	0.118688
0.183968	0.116232
0.184593	0.114086
0.185217	0.112088
0.185841	0.11089
0.186465	0.109235
0.187089	0.106849
0.187713	0.105219
0.188337	0.103221
0.188962	0.101076
0.189586	0.099016
0.19021	0.096368
0.190834	0.094829
0.191458	0.094148
0.192082	0.092603
0.192706	0.09049
0.19333	0.087954
0.193955	0.086071
0.194579	0.085018
0.195203	0.083989
0.195827	0.08219
0.196451	0.080269
0.197075	0.078872
0.197699	0.077961
0.198324	0.076982
0.198948	0.075347
0.199572	0.074339
0.200196	0.073973
0.20082	0.073104
0.201444	0.071524
0.202068	0.070248
0.202692	0.069341
0.203317	0.068389
0.203941	0.067275
0.204565	0.066384
0.205189	0.066051
0.205813	0.065124
0.206437	0.063423
0.207061	0.062235
0.207686	0.061257
0.20831	0.059835
0.208934	0.058703
0.209558	0.058374
0.210182	0.057991
0.210806	0.056644
0.21143	0.056082
0.212054	0.055793
0.212679	0.054962
0.213303	0.054577
0.213927	0.054047
0.214551	0.053262
0.215175	0.052828
0.215799	0.052285
0.216423	0.05227
0.217048	0.052795
0.217672	0.052479
0.218296	0.052525
0.21892	0.052227
0.219544	0.051369
0.220168	0.050882
0.220792	0.050079
0.221416	0.04929
0.222041	0.04836
0.222665	0.047419
0.223289	0.046038
0.223913	0.045386
0.224537	0.045679
0.225161	0.04634
0.225785	0.046589
0.22641	0.046147
0.227034	0.045881
0.227658	0.046112
0.228282	0.045844
0.228906	0.045171
0.22953	0.044032
0.230154	0.043214
0.230778	0.042293
0.231403	0.041649
0.232027	0.04155
0.232651	0.041422
0.233275	0.04142
0.233899	0.041498
0.234523	0.041737
0.235147	0.042126
0.235772	0.041918
0.236396	0.04161
0.23702	0.042456
0.237644	0.042809
0.238268	0.042517
0.238892	0.043084
0.239516	0.043466
0.24014	0.043876
0.240765	0.04409
0.241389	0.044202
0.242013	0.044809
0.242637	0.044508
0.243261	0.044854
0.243885	0.046094
0.244509	0.046263
0.245134	0.046562
0.245758	0.048179
0.246382	0.049624
0.247006	0.050268
0.24763	0.050702
0.248254	0.051379
0.248878	0.052693
0.249502	0.053908
0.250127	0.055873
0.250751	0.058137
0.251375	0.060019
0.251999	0.062465
0.252623	0.065847
0.253247	0.06874
0.253871	0.071353
0.254496	0.074645
0.25512	0.078068
0.255744	0.080895
0.256368	0.083831
0.256992	0.087479
0.257616	0.091436
0.25824	0.096175
0.258864	0.099935
0.259489	0.105044
0.260113	0.110161
0.260737	0.116778
0.261361	0.123366
0.261985	0.128929
0.262609	0.134765
0.263233	0.141026
0.263858	0.148145
0.264482	0.155407
0.265106	0.162976
0.26573	0.170808
0.266354	0.178646
0.266978	0.185879
0.267602	0.193354
0.268226	0.200994
0.268851	0.209275
0.269475	0.218945
0.270099	0.227406
0.270723	0.235754
0.271347	0.244869
0.271971	0.253585
0.272595	0.263388
0.27322	0.272841
0.273844	0.283091
0.274468	0.293315
0.275092	0.302979
0.275716	0.313274
0.27634	0.324492
0.276964	0.334158
0.277588	0.343724
0.278213	0.35455
0.278837	0.365072
0.279461	0.37479
0.280085	0.383701
0.280709	0.393158
0.281333	0.402873
0.281957	0.411448
0.282582	0.420592
0.283206	0.429852
0.28383	0.438687
0.284454	0.447498
0.285078	0.457155
0.285702	0.46578
0.286326	0.47462
0.28695	0.483323
0.287575	0.491062
0.288199	0.498297
0.288823	0.50578
0.289447	0.513591
0.290071	0.521374
0.290695	0.527922
0.291319	0.534569
0.291944	0.539708
0.292568	0.544936
0.293192	0.551589
0.293816	0.557962
0.29444	0.562865
0.295064	0.567487
0.295688	0.571926
0.296312	0.576909
0.296937	0.58094
0.297561	0.58421
0.298185	0.588715
0.298809	0.59284
0.299433	0.596098
0.300057	0.599041
0.300681	0.601724
0.301306	0.604739
0.30193	0.60744
0.302554	0.609741
0.303178	0.611826
0.303802	0.613869
0.304426	0.615589
0.30505	0.61695
0.305674	0.618042
0.306299	0.618658
0.306923	0.61903
0.307547	0.619531
0.308171	0.620038
0.308795	0.619625
0.309419	0.619443
0.310043	0.61924
0.310668	0.619032
0.311292	0.619043
0.311916	0.618344
0.31254	0.618194
0.313164	0.617626
0.313788	0.617848
0.314412	0.617843
0.315036	0.617235
0.315661	0.616517
0.316285	0.614857
0.316909	0.613495
0.317533	0.611993
0.318157	0.610579
0.318781	0.610148
0.319405	0.608904
0.320029	0.607007
0.320654	0.605342
0.321278	0.603706
0.321902	0.603417
0.322526	0.602142
0.32315	0.601401
0.323774	0.60015
0.324398	0.598446
0.325023	0.595859
0.325647	0.594799
0.326271	0.593142
0.326895	0.591187
0.327519	0.588083
0.328143	0.585063
0.328767	0.584355
0.329392	0.581813
0.330016	0.579948
0.33064	0.578358
0.331264	0.576376
0.331888	0.574082
0.332512	0.571571
0.333136	0.569314
0.33376	0.566884
0.334385	0.564114
0.335009	0.561004
0.335633	0.55852
0.336257	0.556238
0.336881	0.554393
0.337505	0.552238
0.338129	0.55023
0.338753	0.547658
0.339378	0.544759
0.340002	0.542651
0.340626	0.540465
0.34125	0.538369
0.341874	0.535815
0.342498	0.534016
0.343122	0.531591
0.343747	0.528503
0.344371	0.526185
0.344995	0.523106
0.345619	0.520027
0.346243	0.517404
0.346867	0.515817
0.347491	0.513817
0.348116	0.512616
0.34874	0.510707
0.349364	0.507015
0.349988	0.503945
0.350612	0.501918
0.351236	0.4996
0.35186	0.496764
0.352484	0.494027
0.353109	0.491473
0.353733	0.488841
0.354357	0.486213
0.354981	0.484592
0.355605	0.48328
0.356229	0.481077
0.356853	0.477923
0.357477	0.474918
0.358102	0.473218
0.358726	0.471866
0.35935	0.470119
0.359974	0.467697
0.360598	0.465882
0.361222	0.463744
0.361846	0.461108
0.362471	0.458393
0.363095	0.456271
0.363719	0.454186
0.364343	0.453245
0.364967	0.45107
0.365591	0.449483
0.366215	0.448117
0.366839	0.44607
0.367464	0.443333
0.368088	0.440156
0.368712	0.437527
0.369336	0.435175
0.36996	0.433231
0.370584	0.43122
0.371208	0.430107
0.371833	0.427757
0.372457	0.425279
0.373081	0.423957
0.373705	0.422863
0.374329	0.421358
0.374953	0.419485
0.375577	0.417027
0.376201	0.415423
0.376826	0.414234
0.37745	0.413341
0.378074	0.41042
0.378698	0.408519
0.379322	0.40652
0.379946	0.404213
0.38057	0.40351
0.381195	0.401726
0.381819	0.399347
0.382443	0.396792
0.383067	0.395124
0.383691	0.393764
0.384315	0.391194
0.384939	0.389581
0.385563	0.387886
0.386188	0.38666
0.386812	0.383922
0.387436	0.382327
0.38806	0.380872
0.388684	0.380377
0.389308	0.377919
0.389932	0.37631
0.390557	0.374795
0.391181	0.373487
0.391805	0.372442
0.392429	0.369682
0.393053	0.36806
0.393677	0.366548
0.394301	0.365157
0.394925	0.364425
0.39555	0.363093
0.396174	0.361064
0.396798	0.359261
0.397422	0.357554
0.398046	0.356701
0.39867	0.356707
0.399294	0.356107
0.399919	0.355157
0.400543	0.35486
0.401167	0.353357
0.401791	0.351982
0.402415	0.35122
0.403039	0.351057
0.403663	0.349953
0.404287	0.348243
0.404912	0.346417
0.405536	0.34583
0.40616	0.34454
0.406784	0.344509
0.407408	0.343929
0.408032	0.342614
0.408656	0.340954
0.409281	0.339987
0.409905	0.338746
0.410529	0.337482
0.411153	0.335891
0.411777	0.334522
0.412401	0.33401
0.413025	0.333423
0.413649	0.333602
0.414274	0.33372
0.414898	0.333377
0.415522	0.333303
0.416146	0.332748
0.41677	0.332846
0.417394	0.331723
0.418018	0.330898
0.418643	0.329827
0.419267	0.329441
0.419891	0.328283
0.420515	0.328065
0.421139	0.327546
0.421763	0.326521
0.422387	0.325351
0.423011	0.324369
0.423636	0.323593
0.42426	0.322812
0.424884	0.32227
0.425508	0.3217
0.426132	0.320742
0.426756	0.318613
0.42738	0.318238
0.428005	0.317356
0.428629	0.317179
0.429253	0.31614
0.429877	0.313897
0.430501	0.312787
0.431125	0.311956
0.431749	0.310436
0.432373	0.310608
0.432998	0.31079
0.433622	0.309306
0.434246	0.308634
0.43487	0.307484
0.435494	0.306372
0.436118	0.306167
0.436742	0.304609
0.437367	0.304478
0.437991	0.303356
0.438615	0.301483
0.439239	0.299939
0.439863	0.299475
0.440487	0.30016
0.441111	0.299685
0.441735	0.299077
0.44236	0.299507
0.442984	0.299586
0.443608	0.299326
0.444232	0.298271
0.444856	0.298063
0.44548	0.296123
0.446104	0.294381
0.446729	0.292916
0.447353	0.291885
0.447977	0.289841
0.448601	0.28893
0.449225	0.288273
0.449849	0.287206
0.450473	0.28572
0.451097	0.285485
0.451722	0.284924
0.452346	0.283558
0.45297	0.282513
0.453594	0.281582
0.454218	0.280503
0.454842	0.279806
0.455466	0.279796
0.456091	0.279686
0.456715	0.278736
0.457339	0.277677
0.457963	0.277516
0.458587	0.276935
0.459211	0.276721
0.459835	0.275874
0.460459	0.27496
0.461084	0.27463
0.461708	0.274135
0.462332	0.273309
0.462956	0.272909
0.46358	0.271709
0.464204	0.270023
0.464828	0.269461
0.465453	0.268051
0.466077	0.267448
0.466701	0.267024
0.467325	0.265722
0.467949	0.265509
0.468573	0.264952
0.469197	0.264314
0.469821	0.264726
0.470446	0.264564
0.47107	0.263902
0.471694	0.262541
0.472318	0.262334
0.472942	0.26258
0.473566	0.261679
0.47419	0.260864
0.474815	0.259631
0.475439	0.259142
0.476063	0.257494
0.476687	0.256804
0.477311	0.256317
0.477935	0.256137
0.478559	0.255672
0.479183	0.255289
0.479808	0.254027
0.480432	0.253254
0.481056	0.253021
0.48168	0.252176
0.482304	0.250945
0.482928	0.250285
0.483552	0.249292
0.484176	0.248636
0.484801	0.248709
0.485425	0.247862
0.486049	0.246597
0.486673	0.245161
0.487297	0.244681
0.487921	0.24429
0.488545	0.243926
0.48917	0.243853
0.489794	0.243607
0.490418	0.243428
0.491042	0.241912
0.491666	0.240693
0.49229	0.239809
0.492914	0.238874
0.493538	0.238119
0.494163	0.236249
0.494787	0.235435
0.495411	0.23449
0.496035	0.233686
0.496659	0.233173
0.497283	0.232391
0.497907	0.231585
0.498532	0.231436
0.499156	0.229677
0.49978	0.228292
0.500404	0.227907
0.501028	0.226874
0.501652	0.226532
0.502276	0.225893
0.5029	0.225455
0.503525	0.224212
0.504149	0.22178
0.504773	0.220365
0.505397	0.219955
0.506021	0.220108
0.506645	0.219034
0.507269	0.218338
0.507894	0.217783
0.508518	0.216842
0.509142	0.21513
0.509766	0.213923
0.51039	0.21379
0.511014	0.214528
0.511638	0.213251
0.512262	0.213182
0.512887	0.212841
0.513511	0.212545
0.514135	0.211076
0.514759	0.210809
0.515383	0.210055
0.516007	0.208046
0.516631	0.207674
0.517256	0.207634
0.51788	0.207662
0.518504	0.205951
0.519128	0.204377
0.519752	0.203202
0.520376	0.201671
0.521	0.199946
0.521624	0.19793
0.522249	0.198623
0.522873	0.198066
0.523497	0.1972
0.524121	0.196453
0.524745	0.195345
0.525369	0.194733
0.525993	0.193739
0.526618	0.192878
0.527242	0.191956
0.527866	0.19094
0.52849	0.190213
0.529114	0.190079
0.529738	0.189508
0.530362	0.188957
0.530986	0.187957
0.531611	0.18661
0.532235	0.185516
0.532859	0.184392
0.533483	0.183427
0.534107	0.182253
0.534731	0.181186
0.535355	0.181406
0.53598	0.181653
0.536604	0.180782
0.537228	0.179099
0.537852	0.178672
0.538476	0.178387
0.5391	0.17771
0.539724	0.176438
0.540348	0.175891
0.540973	0.17575
0.541597	0.174951
0.542221	0.173993
0.542845	0.174032
0.543469	0.172918
0.544093	0.172448
0.544717	0.171537
0.545341	0.171871
0.545966	0.17174
0.54659	0.171086
0.547214	0.171607
0.547838	0.17145
0.548462	0.17074
0.549086	0.169957
0.54971	0.169026
0.550335	0.168211
0.550959	0.167307
0.551583	0.167032
0.552207	0.167116
0.552831	0.167476
0.553455	0.167157
0.554079	0.166256
0.554704	0.16551
0.555328	0.164753
0.555952	0.165081
0.556576	0.165444
0.5572	0.165496
0.557824	0.165198
0.558448	0.163894
0.559072	0.162376
0.559697	0.161791
0.560321	0.159697
0.560945	0.159197
0.561569	0.159614
0.562193	0.160288
0.562817	0.160673
0.563441	0.160671
0.564066	0.1602
0.56469	0.160218
0.565314	0.160669
0.565938	0.161074
0.566562	0.159719
0.567186	0.159179
0.56781	0.158617
0.568434	0.158511
0.569059	0.157252
0.569683	0.157137
0.570307	0.156666
0.570931	0.156637
0.571555	0.15586
0.572179	0.154473
0.572803	0.15312
0.573427	0.151574
0.574052	0.150093
0.574676	0.149249
0.5753	0.148585
0.575924	0.148116
0.576548	0.147439
0.577172	0.146468
0.577796	0.145716
0.578421	0.144908
0.579045	0.144253
0.579669	0.143734
0.580293	0.143141
0.580917	0.143295
0.581541	0.144229
0.582165	0.144531
0.582789	0.143691
0.583414	0.142721
0.584038	0.141965
0.584662	0.141249
0.585286	0.141205
0.58591	0.141851
0.586534	0.141921
0.587158	0.14124
0.587783	0.1401
0.588407	0.139361
0.589031	0.139355
0.589655	0.140002
0.590279	0.140405
0.590903	0.139966
0.591527	0.140557
0.592151	0.140396
0.592776	0.138876
0.5934	0.137342
0.594024	0.135857
0.594648	0.134684
0.595272	0.134391
0.595896	0.134301
0.59652	0.133231
0.597145	0.131877
0.597769	0.131433
0.598393	0.130991
0.599017	0.130986
0.599641	0.130696
0.600265	0.130809
0.600889	0.130477
0.601514	0.130019
0.602138	0.129884
0.602762	0.130132
0.603386	0.130609
0.60401	0.130933
0.604634	0.130684
0.605258	0.130103
0.605882	0.12959
0.606507	0.128882
0.607131	0.128002
0.607755	0.127163
0.608379	0.126786
0.609003	0.126248
0.609627	0.12534
0.610251	0.124509
0.610875	0.12392
0.6115	0.122634
0.612124	0.121306
0.612748	0.120215
0.613372	0.11926
0.613996	0.118409
0.61462	0.118144
0.615244	0.117986
0.615869	0.11724
0.616493	0.116478
0.617117	0.116186
0.617741	0.116417
0.618365	0.116341
0.618989	0.116837
0.619613	0.116278
0.620237	0.115485
0.620862	0.11452
0.621486	0.114178
0.62211	0.113703
0.622734	0.113073
0.623358	0.112715
0.623982	0.112986
0.624606	0.11281
0.625231	0.113112
0.625855	0.113181
0.626479	0.112343
0.627103	0.110809
0.627727	0.110129
0.628351	0.109658
0.628975	0.109744
0.629599	0.109194
0.630224	0.107882
0.630848	0.107081
0.631472	0.106671
0.632096	0.106372
0.63272	0.105839
0.633344	0.105004
0.633968	0.104736
0.634593	0.104017
0.635217	0.10353
0.635841	0.103195
0.636465	0.103641
0.637089	0.104093
0.637713	0.104206
0.638337	0.104377
0.638961	0.104473
0.639586	0.104005
0.64021	0.103633
0.640834	0.103675
0.641458	0.103147
0.642082	0.102154
0.642706	0.101805
0.64333	0.101693
0.643955	0.101276
0.644579	0.101225
0.645203	0.101672
0.645827	0.101467
0.646451	0.100684
0.647075	0.100365
0.647699	0.100518
0.648323	0.099804
0.648948	0.098247
0.649572	0.097297
0.650196	0.096238
0.65082	0.095829
0.651444	0.095391
0.652068	0.094321
0.652692	0.093765
0.653316	0.09359
0.653941	0.093472
0.654565	0.093531
0.655189	0.093353
0.655813	0.092834
0.656437	0.091991
0.657061	0.091083
0.657685	0.090688
0.65831	0.090249
0.658934	0.089438
0.659558	0.088522
0.660182	0.087465
0.660806	0.086089
0.66143	0.085733
0.662054	0.085387
0.662679	0.084048
0.663303	0.083031
0.663927	0.082768
0.664551	0.081877
0.665175	0.081157
0.665799	0.080277
0.666423	0.079623
0.667047	0.079332
0.667672	0.078878
0.668296	0.078557
0.66892	0.07787
0.669544	0.076761
0.670168	0.075443
0.670792	0.075139
0.671416	0.075516
0.672041	0.075291
0.672665	0.074938
0.673289	0.07471
0.673913	0.074217
0.674537	0.074096
0.675161	0.073578
0.675785	0.072916
0.676409	0.072732
0.677034	0.072695
0.677658	0.071914
0.678282	0.071011
0.678906	0.069939
0.67953	0.069495
0.680154	0.068931
0.680778	0.068434
0.681403	0.068103
0.682027	0.067182
0.682651	0.066829
0.683275	0.066541
0.683899	0.06603
0.684523	0.065413
0.685147	0.064674
0.685771	0.064219
0.686396	0.063793
0.68702	0.063629
0.687644	0.06359
0.688268	0.063646
0.688892	0.062942
0.689516	0.062901
0.69014	0.063017
0.690764	0.063319
0.691389	0.063208
0.692013	0.06311
0.692637	0.063422
0.693261	0.063542
0.693885	0.064607
0.694509	0.06488
0.695133	0.064757
0.695758	0.065304
0.696382	0.065836
0.697006	0.065324
0.69763	0.065655
0.698254	0.064942
0.698878	0.064154
0.699502	0.063418
0.700127	0.062718
0.700751	0.062411
0.701375	0.06219
0.701999	0.061778
0.702623	0.061071
0.703247	0.060668
0.703871	0.060581
0.704495	0.061129
0.70512	0.06097
0.705744	0.060318
0.706368	0.059605
0.706992	0.059168
0.707616	0.057652
0.70824	0.056921
0.708864	0.057614
0.709489	0.058285
0.710113	0.0583
0.710737	0.058257
0.711361	0.058468
0.711985	0.058609
0.712609	0.058753
0.713233	0.059022
0.713857	0.058367
0.714482	0.058128
0.715106	0.058316
0.71573	0.057918
0.716354	0.057766
0.716978	0.056934
0.717602	0.0561
0.718226	0.055612
0.71885	0.055031
0.719475	0.055316
0.720099	0.055507
0.720723	0.055273
0.721347	0.054915
0.721971	0.053664
0.722595	0.05343
0.723219	0.053982
0.723844	0.053782
0.724468	0.052767
0.725092	0.051667
0.725716	0.050921
0.72634	0.050697
0.726964	0.050268
0.727588	0.049945
0.728212	0.049606
0.728837	0.049409
0.729461	0.049741
0.730085	0.049674
0.730709	0.049337
0.731333	0.048752
0.731957	0.048283
0.732581	0.048147
0.733206	0.048042
0.73383	0.047163
0.734454	0.045974
0.735078	0.045111
0.735702	0.044967
0.736326	0.045531
0.73695	0.045929
0.737574	0.04586
0.738199	0.045802
0.738823	0.04673
0.739447	0.046166
0.740071	0.044934
0.740695	0.044038
0.741319	0.043627
0.741943	0.042504
0.742568	0.041649
0.743192	0.040498
0.743816	0.04017
0.74444	0.039275
0.745064	0.038835
0.745688	0.038898
0.746312	0.038511
0.746937	0.038419
0.747561	0.038022
0.748185	0.037463
0.748809	0.037453
0.749433	0.037003
0.750057	0.036674
0.750681	0.035803
0.751305	0.034831
0.75193	0.03461
0.752554	0.033868
0.753178	0.034312
0.753802	0.034432
0.754426	0.033085
0.75505	0.031749
0.755674	0.031894
0.756298	0.03162
0.756923	0.032013
0.757547	0.031145
0.758171	0.030216
0.758795	0.03011
0.759419	0.029826
0.760043	0.029862
0.760667	0.028762
0.761292	0.028827
0.761916	0.028884
0.76254	0.029408
0.763164	0.029995
0.763788	0.030377
0.764412	0.030181
0.765036	0.029734
0.76566	0.029656
0.766285	0.02937
0.766909	0.028808
0.767533	0.028499
0.768157	0.027143
0.768781	0.025975
0.769405	0.02509
0.770029	0.024149
0.770654	0.024103
0.771278	0.024434
0.771902	0.024639
0.772526	0.02452
0.77315	0.025047
0.773774	0.025972
0.774398	0.027223
0.775022	0.027549
0.775647	0.02768
0.776271	0.027963
0.776895	0.028009
0.777519	0.028088
0.778143	0.028039
0.778767	0.027824
0.779391	0.027657
0.780016	0.027652
0.78064	0.02802
0.781264	0.028505
0.781888	0.028705
0.782512	0.028443
0.783136	0.028209
0.78376	0.028396
0.784384	0.028197
0.785009	0.027809
0.785633	0.027686
0.786257	0.027339
0.786881	0.02647
0.787505	0.026044
0.788129	0.025672
0.788753	0.026249
0.789378	0.026516
0.790002	0.026113
0.790626	0.026395
0.79125	0.026327
0.791874	0.026622
0.792498	0.026511
0.793122	0.026002
0.793746	0.025564
0.794371	0.024944
0.794995	0.02507
0.795619	0.025499
0.796243	0.025076
0.796867	0.025528
0.797491	0.026323
0.798115	0.025834
0.79874	0.025374
0.799364	0.025497
0.799988	0.026264
0.800612	0.027032
0.801236	0.026999
0.80186	0.027117
0.802484	0.026772
0.803108	0.026422
0.803733	0.0257
0.804357	0.024433
0.804981	0.023001
0.805605	0.022105
0.806229	0.021594
0.806853	0.020361
0.807477	0.020548
0.808102	0.020259
0.808726	0.019777
0.80935	0.018725
0.809974	0.018347
0.810598	0.018069
0.811222	0.017693
0.811846	0.016982
0.81247	0.016961
0.813095	0.016067
0.813719	0.015418
0.814343	0.015061
0.814967	0.015383
0.815591	0.015089
0.816215	0.014165
0.816839	0.014485
0.817464	0.014724
0.818088	0.015738
0.818712	0.016128
0.819336	0.01567
0.81996	0.015292
0.820584	0.014662
0.821208	0.014228
0.821832	0.013721
0.822457	0.013116
0.823081	0.012721
0.823705	0.012521
0.824329	0.012357
0.824953	0.012069
0.825577	0.012167
0.826201	0.011403
0.826825	0.011066
0.82745	0.01098
0.828074	0.010423
0.828698	0.009659
0.829322	0.009581
0.829946	0.009319
0.83057	0.009097
0.831194	0.008781
0.831819	0.008362
0.832443	0.008203
0.833067	0.007995
0.833691	0.007972
0.834315	0.007857
0.834939	0.008735
0.835563	0.010356
0.836187	0.010761
0.836812	0.010771
0.837436	0.010315
0.83806	0.010508
0.838684	0.010284
0.839308	0.010611
0.839932	0.009885
0.840556	0.010129
0.841181	0.009514
0.841805	0.008846
0.842429	0.008703
0.843053	0.009122
0.843677	0.008981
0.844301	0.008598
0.844925	0.009041
0.84555	0.010006
0.846174	0.008852
0.846798	0.008338
0.847422	0.009043
0.848046	0.008039
0.84867	0.008745
0.849294	0.007997
0.849918	0.00771
0.850543	0.007405
0.851167	0.007199
0.851791	0.006443
0.852415	0.006743
0.853039	0.006486
0.853663	0.005674
0.854287	0.004632
0.854912	0.0042
0.855536	0.003831
0.85616	0.00396
0.856784	0.004087
0.857408	0.00379
0.858032	0.003148
0.858656	0.003402
0.85928	0.002726
0.859905	0.002965
0.860529	0.002654
0.861153	0.003158
0.861777	0.003688
0.862401	0.003651
0.863025	0.003616
0.863649	0.004129
0.864273	0.004291
0.864898	0.004219
0.865522	0.003236
0.866146	0.002962
0.86677	0.001759
0.867394	0.001485
0.868018	0.00081
0.868642	0.000474
0.869267	-1.4e-05
0.869891	0.000397
0.870515	-0.00062
0.871139	-5.3e-05
0.871763	-0.00091
0.872387	-0.00071
0.873011	-0.00066
0.873635	-0.00073
0.87426	-0.00195
0.874884	-0.00212
0.875508	-0.00182
0.876132	-0.00144
0.876756	-0.00144
0.87738	-0.00067
0.878004	-0.00062
0.878629	-0.00067
0.879253	8.3e-05
0.879877	-0.00075
0.880501	-0.00021
0.881125	0.000759
0.881749	0.00151
0.882373	0.001563
0.882998	0.001548
0.883622	0.000941
0.884246	0.000901
0.88487	0.001097
0.885494	0.002056
0.886118	0.001291
0.886742	0.00079
0.887366	-0.00018
0.887991	-0.00037
0.888615	-0.00119
0.889239	-0.00204
0.889863	-0.00226
0.890487	-0.00148
0.891111	-0.00183
0.891735	-0.00119
0.892359	-0.00204
0.892984	-0.00276
0.893608	-0.00335
0.894232	-0.00308
0.894856	-0.00339
0.89548	-0.00349
0.896104	-0.00322
0.896728	-0.0025
0.897353	-0.00256
0.897977	-0.00189
0.898601	-0.00255
0.899225	-0.00268
0.899849	-0.00201
0.900473	-0.00123
0.901097	-0.00143
0.901721	-0.00186
0.902346	-0.00252
0.90297	-0.00198
0.903594	-0.00155
0.904218	-0.00069
0.904842	-0.00103
0.905466	-0.00106
0.90609	-0.00164
0.906715	-0.00157
0.907339	-0.0022
0.907963	-0.0022
0.908587	-0.00322
0.909211	-0.00357
0.909835	-0.00359
0.910459	-0.00404
0.911083	-0.00413
0.911708	-0.00438
0.912332	-0.00571
0.912956	-0.00687
0.91358	-0.00705
0.914204	-0.00786
0.914828	-0.00773
0.915452	-0.00827
0.916077	-0.00798
0.916701	-0.00817
0.917325	-0.00832
0.917949	-0.00766
0.918573	-0.007
0.919197	-0.00814
0.919821	-0.00839
0.920445	-0.00763
0.92107	-0.00696
0.921694	-0.00745
0.922318	-0.00769
0.922942	-0.00736
0.923566	-0.00816
0.92419	-0.00833
0.924814	-0.00705
0.925439	-0.00797
0.926063	-0.00819
0.926687	-0.00863
0.927311	-0.00976
0.927935	-0.01036
0.928559	-0.01083
0.929183	-0.01156
0.929807	-0.01091
0.930432	-0.01106
0.931056	-0.01216
0.93168	-0.01236
0.932304	-0.01298
0.932928	-0.01301
0.933552	-0.01333
0.934176	-0.01388
0.934801	-0.01418
0.935425	-0.0153
0.936049	-0.015
0.936673	-0.01526
0.937297	-0.01486
0.937921	-0.01473
0.938545	-0.01464
0.939169	-0.01537
0.939794	-0.01523
0.940418	-0.0153
0.941042	-0.01556
0.941666	-0.01596
0.94229	-0.016
0.942914	-0.01591
0.943538	-0.01621
0.944163	-0.0171
0.944787	-0.01803
0.945411	-0.01703
0.946035	-0.01739
0.946659	-0.01752
0.947283	-0.01788
0.947907	-0.01795
0.948531	-0.01783
0.949156	-0.01847
0.94978	-0.01888
0.950404	-0.01864
0.951028	-0.01895
0.951652	-0.01963
0.952276	-0.02049
0.9529	-0.02091
0.953525	-0.02133
0.954149	-0.02237
0.954773	-0.02213
0.955397	-0.02216
0.956021	-0.02287
0.956645	-0.02332
0.957269	-0.02362
0.957893	-0.02364
0.958518	-0.02385
0.959142	-0.02381
0.959766	-0.02383
0.96039	-0.02431
0.961014	-0.02453
0.961638	-0.02498
0.962262	-0.02473
0.962887	-0.02525
0.963511	-0.02532
0.964135	-0.02467
0.964759	-0.0245
0.965383	-0.02446
0.966007	-0.02483
0.966631	-0.02487
0.967255	-0.02488
0.96788	-0.02495
0.968504	-0.02549
0.969128	-0.02594
0.969752	-0.0264
0.970376	-0.02694
0.971	-0.02783
0.971624	-0.02808
0.972248	-0.02851
0.972873	-0.02925
0.973497	-0.02982
0.974121	-0.03026
0.974745	-0.02971
0.975369	-0.02906
0.975993	-0.02817
0.976617	-0.02798
0.977242	-0.02813
0.977866	-0.02811
0.97849	-0.02859
0.979114	-0.02893
0.979738	-0.02871
0.980362	-0.02886
0.980986	-0.02881
0.98161	-0.02998
0.982235	-0.02912
0.982859	-0.02824
0.983483	-0.02787
0.984107	-0.0276
0.984731	-0.02744
0.985355	-0.02748
0.985979	-0.02816
0.986604	-0.02878
0.987228	-0.02978
0.987852	-0.0296
0.988476	-0.0294
0.9891	-0.03008
0.989724	-0.03036
0.990348	-0.03099
0.990972	-0.03146
0.991597	-0.03179
0.992221	-0.03202
0.992845	-0.03144
0.993469	-0.03277
0.994093	-0.03344
0.994717	-0.03408
0.995341	-0.03544
0.995966	-0.03535
0.99659	-0.03538
0.997214	-0.03518
0.997838	-0.03511
0.998462	-0.03459
0.999086	-0.03355
0.99971	-0.03411
1.00033	-0.03553
1.00096	-0.03556
1.00158	-0.03479
1.00221	-0.03399
1.00283	-0.03418
1.00345	-0.0349
1.00408	-0.0342
1.0047	-0.0339
1.00533	-0.03443
1.00595	-0.0355
1.00658	-0.03657
1.0072	-0.03742
1.00782	-0.03776
1.00845	-0.03755
1.00907	-0.03751
1.0097	-0.03794
1.01032	-0.03793
1.01094	-0.03814
1.01157	-0.03859
1.01219	-0.03838
1.01282	-0.0371
1.01344	-0.03636
1.01407	-0.03676
1.01469	-0.03675
1.01531	-0.03675
1.01594	-0.03664
1.01656	-0.03615
1.01719	-0.03601
1.01781	-0.03544
1.01843	-0.03511
1.01906	-0.0353
1.01968	-0.03554
1.02031	-0.03541
1.02093	-0.03465
1.02155	-0.03466
1.02218	-0.03498
1.0228	-0.03498
1.02343	-0.03508
1.02405	-0.03572
1.02468	-0.03562
1.0253	-0.03488
1.02592	-0.03424
1.02655	-0.03394
1.02717	-0.03368
1.0278	-0.03339
1.02842	-0.03337
1.02904	-0.03334
1.02967	-0.03365
1.03029	-0.03463
1.03092	-0.03502
1.03154	-0.03449
1.03216	-0.0346
1.03279	-0.03564
1.03341	-0.03626
1.03404	-0.03643
1.03466	-0.03611
1.03529	-0.03651
1.03591	-0.03684
1.03653	-0.03664
1.03716	-0.03606
1.03778	-0.03548
1.03841	-0.03518
1.03903	-0.03595
1.03965	-0.03657
1.04028	-0.03675
1.0409	-0.03575
1.04153	-0.03589
1.04215	-0.03628
1.04278	-0.03636
1.0434	-0.03691
1.04402	-0.03748
1.04465	-0.03789
1.04527	-0.03821
1.0459	-0.03926
1.04652	-0.03874
1.04714	-0.03877
1.04777	-0.0392
1.04839	-0.03925
1.04902	-0.04001
1.04964	-0.03946
1.05027	-0.03964
1.05089	-0.04031
1.05151	-0.04033
1.05214	-0.04088
1.05276	-0.04057
1.05339	-0.03972
1.05401	-0.03893
1.05463	-0.03829
1.05526	-0.03843
1.05588	-0.03789
1.05651	-0.03795
1.05713	-0.03838
1.05776	-0.03766
1.05838	-0.03737
1.059	-0.03776
1.05963	-0.03795
1.06025	-0.03827
1.06088	-0.03911
1.0615	-0.0392
1.06212	-0.03829
1.06275	-0.03715
1.06337	-0.03683
1.064	-0.03627
1.06462	-0.03541
1.06524	-0.03529
1.06587	-0.03495
1.06649	-0.03452
1.06712	-0.03457
1.06774	-0.03454
1.06837	-0.03457
1.06899	-0.03448
1.06961	-0.03425
1.07024	-0.03397
1.07086	-0.03355
1.07149	-0.03342
1.07211	-0.03325
1.07273	-0.03314
1.07336	-0.03278
1.07398	-0.03233
1.07461	-0.03233
1.07523	-0.03262
1.07586	-0.03314
1.07648	-0.03324
1.0771	-0.03354
1.07773	-0.03469
1.07835	-0.035
1.07898	-0.03489
1.0796	-0.03508
1.08022	-0.03459
1.08085	-0.03395
1.08147	-0.03385
1.0821	-0.0335
1.08272	-0.03353
1.08334	-0.0337
1.08397	-0.03352
1.08459	-0.03412
1.08522	-0.03552
1.08584	-0.03665
1.08647	-0.03684
1.08709	-0.03727
1.08771	-0.03726
1.08834	-0.03692
1.08896	-0.03705
1.08959	-0.03777
1.09021	-0.03807
1.09083	-0.03779
1.09146	-0.03746
1.09208	-0.03736
1.09271	-0.03768
1.09333	-0.03847
1.09396	-0.03978
1.09458	-0.0396
1.0952	-0.03982
1.09583	-0.04022
1.09645	-0.04066
1.09708	-0.04141
1.0977	-0.04095
1.09832	-0.04049
1.09895	-0.04092
1.09957	-0.04144
1.1002	-0.0419
1.10082	-0.04218
1.10144	-0.04264
1.10207	-0.04246
1.10269	-0.04217
1.10332	-0.04282
1.10394	-0.04316
1.10457	-0.04324
1.10519	-0.04402
1.10581	-0.04425
1.10644	-0.04364
1.10706	-0.04306
1.10769	-0.04263
1.10831	-0.04152
1.10893	-0.04091
1.10956	-0.04136
1.11018	-0.04195
1.11081	-0.04208
1.11143	-0.04238
1.11205	-0.043
1.11268	-0.04299
1.1133	-0.04204
1.11393	-0.04177
1.11455	-0.04152
1.11518	-0.04151
1.1158	-0.04156
1.11642	-0.04126
1.11705	-0.04086
1.11767	-0.04026
1.1183	-0.03974
1.11892	-0.04019
1.11954	-0.04074
1.12017	-0.04085
1.12079	-0.04071
1.12142	-0.04005
1.12204	-0.04039
1.12267	-0.04103
1.12329	-0.04107
1.12391	-0.04113
1.12454	-0.04104
1.12516	-0.04073
1.12579	-0.04063
1.12641	-0.04052
1.12703	-0.04023
1.12766	-0.04013
1.12828	-0.0398
1.12891	-0.04029
1.12953	-0.04123
1.13015	-0.04084
1.13078	-0.04033
1.1314	-0.04022
1.13203	-0.04022
1.13265	-0.04019
1.13328	-0.04096
1.1339	-0.04161
1.13452	-0.04164
1.13515	-0.04167
1.13577	-0.0419
1.1364	-0.04141
1.13702	-0.04082
1.13764	-0.04082
1.13827	-0.04063
1.13889	-0.04091
1.13952	-0.04172
1.14014	-0.04211
1.14076	-0.04225
1.14139	-0.04213
1.14201	-0.04219
1.14264	-0.0425
1.14326	-0.04243
1.14389	-0.04292
1.14451	-0.04346
1.14513	-0.04331
1.14576	-0.04277
1.14638	-0.04247
1.14701	-0.04231
1.14763	-0.04155
1.14825	-0.04096
1.14888	-0.04147
1.1495	-0.04184
1.15013	-0.04102
1.15075	-0.04057
1.15138	-0.04085
1.152	-0.04096
1.15262	-0.0409
1.15325	-0.04069
1.15387	-0.04095
1.1545	-0.04132
1.15512	-0.04101
1.15574	-0.04148
1.15637	-0.04203
1.15699	-0.042
1.15762	-0.0423
1.15824	-0.04276
1.15886	-0.04321
1.15949	-0.04344
1.16011	-0.04356
1.16074	-0.04314
1.16136	-0.04279
1.16199	-0.04275
1.16261	-0.04226
1.16323	-0.04246
1.16386	-0.04217
1.16448	-0.04133
1.16511	-0.04103
1.16573	-0.04128
1.16635	-0.04202
1.16698	-0.04236
1.1676	-0.0423
1.16823	-0.04363
1.16885	-0.04398
1.16948	-0.0443
1.1701	-0.04438
1.17072	-0.04357
1.17135	-0.04327
1.17197	-0.04384
1.1726	-0.04379
1.17322	-0.04458
1.17384	-0.04467
1.17447	-0.0445
1.17509	-0.04418
1.17572	-0.04391
1.17634	-0.04431
1.17696	-0.04494
1.17759	-0.04563
1.17821	-0.04585
1.17884	-0.04674
1.17946	-0.0475
1.18009	-0.04772
1.18071	-0.04832
1.18133	-0.04916
1.18196	-0.05006
1.18258	-0.04973
1.18321	-0.04961
1.18383	-0.04957
1.18445	-0.0494
1.18508	-0.04905
1.1857	-0.04837
1.18633	-0.04828
1.18695	-0.04837
1.18758	-0.04738
1.1882	-0.04728
1.18882	-0.04729
1.18945	-0.04784
1.19007	-0.04758
1.1907	-0.04639
1.19132	-0.04599
1.19194	-0.04561
1.19257	-0.04616
1.19319	-0.04628
1.19382	-0.0466
1.19444	-0.04702
1.19506	-0.0466
1.19569	-0.04669
1.19631	-0.04717
1.19694	-0.04738
1.19756	-0.04684
1.19819	-0.04665
1.19881	-0.04674
1.19943	-0.04641
1.20006	-0.04672
1.20068	-0.04745
1.20131	-0.04745
1.20193	-0.04806
1.20255	-0.04841
1.20318	-0.04851
1.2038	-0.0481
1.20443	-0.04709
1.20505	-0.04659
1.20567	-0.04703
1.2063	-0.04755
1.20692	-0.04865
1.20755	-0.04928
1.20817	-0.04966
1.2088	-0.05023
1.20942	-0.05026
1.21004	-0.05025
1.21067	-0.05047
1.21129	-0.05052
1.21192	-0.05038
1.21254	-0.05023
1.21316	-0.05026
1.21379	-0.05055
1.21441	-0.05097
1.21504	-0.05095
1.21566	-0.05129
1.21629	-0.05212
1.21691	-0.05228
1.21753	-0.05238
1.21816	-0.05262
1.21878	-0.05292
1.21941	-0.05333
1.22003	-0.05391
1.22065	-0.05346
1.22128	-0.05293
1.2219	-0.05386
1.22253	-0.05408
1.22315	-0.05403
1.22377	-0.05398
1.2244	-0.05464
1.22502	-0.05447
1.22565	-0.05393
1.22627	-0.05442
1.2269	-0.05539
1.22752	-0.05533
1.22814	-0.05515
1.22877	-0.05557
1.22939	-0.0554
1.23002	-0.05583
1.23064	-0.05587
1.23126	-0.05578
1.23189	-0.05522
1.23251	-0.05625
1.23314	-0.05622
1.23376	-0.05594
[truncated: 35,827 more rows]
