# Supplementary material for: Purified zymogens reveal mechanisms of snake venom metalloproteinase auto-activation
Source: eLife. 2026 Jun 10;15:RP109112. doi: 10.7554/eLife.109112 (PMC13252954; doi:10.7554/eLife.109112)
Supplement: Figure 3—figure supplement 4—source data 3. [file elife-109112-fig3-figsupp4-data3.xlsx]

## Sheet: Sheet1
Volume (mL)	Abs 280 nm (mAU)
0	0.062493
0.001	0.062201
0.002	0.061908
0.002	0.061615
0.003	0.061323
0.004	0.060799
0.004	0.060041
0.005	0.059109
0.006	0.058172
0.006	0.057236
0.007	0.056374
0.008	0.055457
0.008	0.054374
0.009	0.053282
0.01	0.052195
0.01	0.051111
0.011	0.050086
0.012	0.049194
0.012	0.048496
0.013	0.047802
0.014	0.047109
0.014	0.046435
0.015	0.045816
0.016	0.045475
0.016	0.045135
0.017	0.044796
0.018	0.044456
0.018	0.044117
0.019	0.043875
0.02	0.04378
0.02	0.043742
0.021	0.043704
0.022	0.043666
0.022	0.04383
0.023	0.044348
0.024	0.045031
0.024	0.045714
0.025	0.046397
0.025	0.047082
0.026	0.046936
0.027	0.046098
0.027	0.044904
0.028	0.043711
0.029	0.042521
0.029	0.041368
0.03	0.040344
0.031	0.039649
0.031	0.038912
0.032	0.038142
0.033	0.037347
0.033	0.036554
0.034	0.035761
0.035	0.035351
0.035	0.035126
0.036	0.0349
0.037	0.034676
0.037	0.034613
0.038	0.034226
0.039	0.033596
0.039	0.032899
0.04	0.032206
0.041	0.031512
0.041	0.031061
0.042	0.031141
0.043	0.031988
0.043	0.032834
0.044	0.033682
0.045	0.034425
0.045	0.034726
0.046	0.034007
0.047	0.033054
0.047	0.032107
0.048	0.031158
0.049	0.030182
0.049	0.029103
0.05	0.027649
0.05	0.026156
0.051	0.024666
0.052	0.023189
0.052	0.021718
0.053	0.020573
0.054	0.019578
0.054	0.018645
0.055	0.017708
0.056	0.016776
0.056	0.016263
0.057	0.015272
0.058	0.013795
0.058	0.012321
0.059	0.01085
0.06	0.009113
0.06	0.007612
0.061	0.006495
0.062	0.005543
0.062	0.004596
0.063	0.003652
0.064	0.002857
0.064	0.002225
0.065	0.001416
0.066	0.000609
0.066	-0.0002
0.067	-0.00112
0.068	-0.00227
0.068	-0.00368
0.069	-0.00496
0.07	-0.00621
0.07	-0.00746
0.071	-0.00865
0.072	-0.00869
0.072	-0.00859
0.073	-0.00845
0.074	-0.0083
0.074	-0.00816
0.075	-0.00788
0.076	-0.00707
0.076	-0.00595
0.077	-0.00471
0.077	-0.00346
0.078	-0.00222
0.079	-0.00166
0.079	-0.0017
0.08	-0.00211
0.081	-0.00252
0.081	-0.00294
0.082	-0.00327
0.083	-0.00334
0.083	-0.00303
0.084	-0.00271
0.085	-0.00238
0.085	-0.00205
0.086	-0.00167
0.087	-0.00114
0.087	-0.00018
0.088	0.000815
0.089	0.001815
0.089	0.002771
0.09	0.003454
0.091	0.003745
0.091	0.003977
0.092	0.004211
0.093	0.004445
0.093	0.004678
0.094	0.005283
0.095	0.005997
0.095	0.006725
0.096	0.007449
0.097	0.008179
0.097	0.008976
0.098	0.009461
0.099	0.009586
0.099	0.00971
0.1	0.009834
0.101	0.009895
0.101	0.009721
0.102	0.0093
0.102	0.009072
0.103	0.008845
0.104	0.008618
0.104	0.008613
0.105	0.008988
0.106	0.009187
0.106	0.009344
0.107	0.009493
0.108	0.009648
0.108	0.009835
0.109	0.010389
0.11	0.011492
0.11	0.012758
0.111	0.014028
0.112	0.015286
0.112	0.015904
0.113	0.015537
0.114	0.014713
0.114	0.013817
0.115	0.012931
0.116	0.012241
0.116	0.011681
0.117	0.011094
0.118	0.010387
0.118	0.009677
0.119	0.008969
0.12	0.008312
0.12	0.00798
0.121	0.008213
0.122	0.008634
0.122	0.009053
0.123	0.009334
0.124	0.009389
0.124	0.009156
0.125	0.008393
0.126	0.007633
0.126	0.006899
0.127	0.006304
0.127	0.006069
0.128	0.005843
0.129	0.005619
0.129	0.005396
0.13	0.005174
0.131	0.004958
0.131	0.00504
0.132	0.005462
0.133	0.006049
0.133	0.006636
0.134	0.007233
0.135	0.00792
0.135	0.008339
0.136	0.008547
0.137	0.008719
0.137	0.008883
0.138	0.008781
0.139	0.008459
0.139	0.007974
0.14	0.007414
0.141	0.006854
0.141	0.006375
0.142	0.006094
0.143	0.006152
0.143	0.00695
0.144	0.00775
0.145	0.008549
0.145	0.009415
0.146	0.010391
0.147	0.0108
0.147	0.010998
0.148	0.011141
0.149	0.011212
0.149	0.011077
0.15	0.010645
0.151	0.010154
0.151	0.00964
0.152	0.009111
0.153	0.008533
0.153	0.007489
0.154	0.006873
0.154	0.006537
0.155	0.00629
0.156	0.006052
0.156	0.006033
0.157	0.005902
0.158	0.005496
0.158	0.004988
0.159	0.004463
0.16	0.003888
0.16	0.003223
0.161	0.002485
0.162	0.001728
0.162	0.00066
0.163	-0.00096
0.164	-0.00246
0.164	-0.0038
0.165	-0.00495
0.166	-0.0051
0.166	-0.00535
0.167	-0.00576
0.168	-0.00616
0.168	-0.00655
0.169	-0.00694
0.17	-0.00734
0.17	-0.00766
0.171	-0.00772
0.172	-0.00771
0.172	-0.00776
0.173	-0.0078
0.174	-0.00837
0.174	-0.00884
0.175	-0.00904
0.176	-0.00918
0.176	-0.00919
0.177	-0.00907
0.178	-0.00916
0.178	-0.00937
0.179	-0.00958
0.179	-0.01007
0.18	-0.01091
0.181	-0.01189
0.181	-0.01289
0.182	-0.01394
0.183	-0.01502
0.183	-0.01585
0.184	-0.01645
0.185	-0.01704
0.185	-0.01762
0.186	-0.01804
0.187	-0.01795
0.187	-0.01785
0.188	-0.01771
0.189	-0.01716
0.189	-0.01658
0.19	-0.01613
0.191	-0.01569
0.191	-0.01521
0.192	-0.0145
0.193	-0.01372
0.193	-0.01293
0.194	-0.01214
0.195	-0.01177
0.195	-0.01094
0.196	-0.00976
0.197	-0.00853
0.197	-0.00689
0.198	-0.00445
0.199	-0.00284
0.199	-0.00146
0.2	-9.1e-05
0.201	0.001063
0.201	0.002077
0.202	0.003067
0.203	0.004055
0.203	0.004732
0.204	0.004702
0.204	0.004147
0.205	0.003457
0.206	0.002768
0.206	0.00214
0.207	0.001937
0.208	0.002128
0.208	0.002361
0.209	0.002623
0.21	0.002875
0.21	0.002944
0.211	0.002862
0.212	0.002779
0.212	0.002558
0.213	0.002416
0.214	0.002536
0.214	0.002656
0.215	0.002907
0.216	0.003687
0.216	0.004916
0.217	0.006201
0.218	0.007489
0.218	0.008577
0.219	0.009407
0.22	0.010164
0.22	0.010919
0.221	0.01165
0.222	0.011989
0.222	0.011899
0.223	0.01169
0.224	0.011482
0.224	0.011671
0.225	0.012065
0.226	0.012438
0.226	0.012812
0.227	0.012884
0.228	0.012379
0.228	0.011767
0.229	0.011232
0.23	0.010696
0.23	0.009995
0.231	0.008475
0.231	0.006512
0.232	0.004547
0.233	0.002967
0.233	0.002385
0.234	0.002313
0.235	0.002269
0.235	0.002225
0.236	0.001744
0.237	0.001405
0.237	0.001292
0.238	0.001179
0.239	0.001072
0.239	0.000893
0.24	0.000664
0.241	0.000429
0.241	0.000195
0.242	0.000565
0.243	0.001162
0.243	0.001716
0.244	0.002237
0.245	0.00274
0.245	0.003373
0.246	0.004233
0.247	0.00515
0.247	0.006075
0.248	0.006924
0.249	0.007374
0.249	0.007482
0.25	0.00759
0.251	0.007632
0.251	0.00778
0.252	0.00813
0.253	0.008531
0.253	0.008929
0.254	0.009434
0.255	0.010083
0.255	0.010757
0.256	0.011424
0.256	0.012181
0.257	0.012439
0.258	0.012486
0.258	0.012517
0.259	0.012609
0.26	0.013695
0.26	0.015872
0.261	0.018132
0.262	0.020413
0.262	0.022626
0.263	0.024595
0.264	0.026489
0.264	0.028388
0.265	0.030335
0.266	0.032357
0.266	0.033572
0.267	0.034666
0.268	0.035766
0.268	0.036818
0.269	0.038776
0.27	0.041046
0.27	0.043374
0.271	0.045792
0.272	0.049253
0.272	0.052934
0.273	0.056628
0.274	0.060326
0.274	0.063865
0.275	0.066424
0.276	0.068781
0.276	0.071141
0.277	0.073505
0.278	0.07639
0.278	0.079351
0.279	0.082292
0.28	0.085268
0.28	0.08856
0.281	0.092042
0.281	0.095567
0.282	0.099085
0.283	0.102313
0.283	0.104454
0.284	0.106565
0.285	0.108723
0.285	0.110853
0.286	0.11388
0.287	0.117286
0.287	0.120764
0.288	0.124184
0.289	0.127831
0.289	0.131848
0.29	0.135809
0.291	0.139732
0.291	0.143686
0.292	0.147365
0.293	0.150359
0.293	0.153323
0.294	0.156273
0.295	0.159312
0.295	0.162617
0.296	0.165959
0.297	0.169263
0.297	0.172357
0.298	0.175319
0.299	0.17796
0.299	0.180552
0.3	0.183259
0.301	0.186119
0.301	0.189358
0.302	0.192856
0.303	0.196377
0.303	0.1999
0.304	0.203272
0.305	0.205878
0.305	0.207822
0.306	0.209763
0.307	0.211476
0.307	0.212702
0.308	0.213705
0.308	0.214795
0.309	0.215885
0.31	0.21721
0.31	0.218717
0.311	0.219886
0.312	0.221053
0.312	0.222352
0.313	0.223921
0.314	0.225421
0.314	0.226763
0.315	0.228099
0.316	0.229436
0.316	0.231148
0.317	0.233776
0.318	0.236398
0.318	0.239033
0.319	0.241442
0.32	0.24308
0.32	0.244418
0.321	0.245663
0.322	0.246237
0.322	0.245623
0.323	0.244668
0.324	0.243711
0.324	0.242974
0.325	0.242853
0.326	0.243094
0.326	0.243395
0.327	0.243687
0.328	0.243841
0.328	0.243713
0.329	0.243444
0.33	0.243177
0.33	0.242888
0.331	0.242503
0.332	0.24203
0.332	0.241547
0.333	0.240936
0.333	0.239713
0.334	0.237689
0.335	0.235407
0.335	0.233144
0.336	0.231075
0.337	0.229408
0.337	0.227926
0.338	0.226451
0.339	0.224803
0.339	0.222862
0.34	0.221181
0.341	0.219919
0.341	0.218653
0.342	0.217944
0.343	0.217615
0.343	0.21692
0.344	0.216187
0.345	0.215311
0.345	0.213999
0.346	0.212184
0.347	0.210158
0.347	0.208175
0.348	0.206561
0.349	0.205447
0.349	0.204487
0.35	0.203535
0.351	0.202478
0.351	0.201255
0.352	0.199923
0.353	0.198475
0.353	0.196934
0.354	0.195217
0.355	0.193228
0.355	0.192013
0.356	0.190793
0.357	0.189613
0.357	0.188323
0.358	0.186647
0.358	0.184805
0.359	0.182956
0.36	0.181488
0.36	0.180552
0.361	0.179778
0.362	0.179009
0.362	0.178269
0.363	0.177633
0.364	0.177063
0.364	0.176499
0.365	0.175936
0.366	0.175234
0.366	0.175009
0.367	0.174969
0.368	0.17493
0.368	0.174899
0.369	0.174548
0.37	0.17399
0.37	0.173401
0.371	0.17281
0.372	0.172332
0.372	0.172278
0.373	0.172394
0.374	0.172509
0.374	0.172654
0.375	0.172088
0.376	0.171142
0.376	0.170194
0.377	0.169245
0.378	0.168712
0.378	0.168578
0.379	0.168534
0.38	0.16849
0.38	0.168131
0.381	0.166872
0.382	0.165241
0.382	0.163595
0.383	0.161941
0.384	0.160586
0.384	0.1595
0.385	0.158467
0.385	0.157438
0.386	0.156594
0.387	0.156978
0.387	0.158016
0.388	0.159113
0.389	0.160212
0.389	0.16044
0.39	0.160128
0.391	0.159739
0.391	0.15935
0.392	0.159373
0.393	0.159633
0.393	0.159802
0.394	0.159939
0.395	0.160078
0.395	0.159715
0.396	0.158996
0.397	0.158216
0.397	0.157441
0.398	0.156504
0.399	0.155301
0.399	0.154093
0.4	0.152901
0.401	0.151708
0.401	0.150684
0.402	0.149769
0.403	0.148863
0.403	0.147962
0.404	0.14728
0.405	0.147206
0.405	0.147388
0.406	0.147605
0.407	0.147835
0.407	0.148128
0.408	0.148486
0.409	0.148795
0.409	0.149105
0.41	0.149383
0.41	0.149396
0.411	0.149049
0.412	0.148679
0.412	0.14831
0.413	0.148483
0.414	0.149761
0.414	0.151381
0.415	0.152994
0.416	0.154371
0.416	0.154857
0.417	0.15444
0.418	0.154012
0.418	0.153584
0.419	0.152973
0.42	0.151545
0.42	0.149522
0.421	0.147489
0.422	0.145552
0.422	0.144468
0.423	0.145403
0.424	0.14643
0.424	0.147463
0.425	0.14818
0.426	0.1466
0.426	0.143649
0.427	0.140694
0.428	0.137812
0.428	0.135677
0.429	0.135176
0.43	0.134884
0.43	0.134592
0.431	0.134307
0.432	0.134215
0.432	0.134735
0.433	0.13525
0.434	0.135679
0.434	0.135554
0.435	0.134611
0.436	0.133594
0.436	0.132576
0.437	0.131649
0.437	0.130764
0.438	0.12957
0.439	0.128376
0.439	0.127274
0.44	0.126393
0.441	0.125617
0.441	0.124828
0.442	0.124039
0.443	0.123324
0.443	0.122804
0.444	0.122417
0.445	0.122031
0.445	0.121651
0.446	0.120885
0.447	0.119464
0.447	0.117973
0.448	0.116483
0.449	0.115015
0.449	0.113998
0.45	0.113632
0.451	0.113266
0.451	0.112863
0.452	0.112616
0.453	0.112728
0.453	0.112926
0.454	0.113124
0.455	0.112528
0.455	0.110221
0.456	0.107065
0.457	0.103921
0.457	0.101221
0.458	0.10016
0.459	0.101014
0.459	0.102455
0.46	0.104011
0.461	0.105415
0.461	0.105568
0.462	0.104656
0.462	0.103737
0.463	0.103061
0.464	0.103146
0.464	0.103676
0.465	0.104231
0.466	0.104798
0.466	0.10562
0.467	0.107153
0.468	0.109027
0.468	0.110892
0.469	0.112246
0.47	0.112755
0.47	0.112928
0.471	0.113066
0.472	0.113204
0.472	0.113637
0.473	0.113908
0.474	0.114119
0.474	0.114328
0.475	0.113965
0.476	0.112811
0.476	0.111459
0.477	0.110096
0.478	0.108735
0.478	0.108818
0.479	0.109346
0.48	0.109858
0.48	0.110377
0.481	0.109965
0.482	0.109081
0.482	0.108208
0.483	0.107363
0.484	0.106787
0.484	0.107485
0.485	0.108772
0.486	0.110089
0.486	0.111415
0.487	0.112487
0.487	0.114216
0.488	0.116412
0.489	0.118641
0.489	0.120581
0.49	0.121161
0.491	0.120361
0.491	0.119232
0.492	0.118096
0.493	0.117546
0.493	0.117718
0.494	0.118054
0.495	0.118389
0.495	0.118531
0.496	0.117747
0.497	0.116336
0.497	0.114835
0.498	0.113348
0.499	0.111188
0.499	0.108761
0.5	0.106304
0.501	0.103851
0.501	0.101862
0.502	0.101021
0.503	0.100626
0.503	0.100281
0.504	0.099934
0.505	0.098405
0.505	0.096029
0.506	0.093459
0.507	0.090906
0.507	0.088733
0.508	0.088264
0.509	0.08866
0.509	0.089164
0.51	0.089664
0.511	0.090912
0.511	0.09081
0.512	0.090419
0.513	0.090016
0.513	0.089403
0.514	0.088925
0.514	0.089243
0.515	0.090018
0.516	0.090793
0.516	0.090677
0.517	0.088819
0.518	0.086119
0.518	0.083428
0.519	0.081021
0.52	0.079382
0.52	0.078325
0.521	0.077323
0.522	0.076322
0.522	0.075433
0.523	0.075058
0.524	0.075268
0.524	0.075477
0.525	0.075654
0.526	0.075509
0.526	0.074764
0.527	0.073953
0.528	0.073192
0.528	0.072825
0.529	0.073273
0.53	0.073996
0.53	0.074719
0.531	0.075335
0.532	0.075756
0.532	0.076565
0.533	0.077439
0.534	0.078396
0.534	0.079705
0.535	0.081235
0.536	0.082388
0.536	0.083539
0.537	0.08448
0.538	0.085445
0.538	0.08726
0.539	0.089184
0.539	0.090918
0.54	0.091894
0.541	0.091692
0.541	0.090807
0.542	0.089925
0.543	0.089174
0.543	0.088151
0.544	0.086607
0.545	0.085006
0.545	0.083586
0.546	0.082819
0.547	0.082807
0.547	0.083085
0.548	0.083363
0.549	0.082916
0.549	0.082471
0.55	0.082668
0.551	0.082865
0.551	0.08322
0.552	0.083636
0.553	0.083654
0.553	0.083383
0.554	0.083111
0.555	0.082475
0.555	0.081496
0.556	0.080484
0.557	0.079472
0.557	0.078707
0.558	0.07856
0.559	0.078781
0.559	0.079032
0.56	0.079284
0.561	0.079347
0.561	0.07881
0.562	0.077967
0.563	0.077122
0.563	0.076336
0.564	0.075955
0.564	0.07595
0.565	0.076045
0.566	0.076141
0.566	0.076188
0.567	0.075746
0.568	0.074586
0.568	0.073418
0.569	0.07211
0.57	0.070804
0.57	0.069763
0.571	0.068793
0.572	0.067824
0.572	0.067779
0.573	0.068743
0.574	0.069918
0.574	0.071096
0.575	0.072071
0.576	0.072334
0.576	0.072489
0.577	0.072642
0.578	0.072793
0.578	0.072073
0.579	0.070687
0.58	0.069299
0.58	0.067945
0.581	0.067148
0.582	0.068782
0.582	0.070568
0.583	0.072344
0.584	0.074098
0.584	0.074538
0.585	0.074104
0.586	0.07367
0.586	0.073233
0.587	0.073215
0.588	0.074841
0.588	0.076653
0.589	0.078474
0.59	0.080301
0.59	0.081058
0.591	0.081085
0.591	0.081076
0.592	0.081066
0.593	0.080927
0.593	0.080771
0.594	0.080643
0.595	0.080518
0.595	0.080392
0.596	0.080586
0.597	0.080692
0.597	0.080798
0.598	0.080887
0.599	0.080526
0.599	0.079664
0.6	0.078786
0.601	0.077906
0.601	0.077212
0.602	0.078316
0.603	0.079827
0.603	0.081348
0.604	0.082755
0.605	0.083215
0.605	0.081907
0.606	0.080518
0.607	0.079126
0.607	0.077791
0.608	0.07685
0.609	0.076364
0.609	0.075878
0.61	0.075422
0.611	0.07527
0.611	0.075835
0.612	0.076506
0.613	0.077178
0.613	0.077741
0.614	0.077524
0.615	0.076356
0.615	0.07519
0.616	0.073996
0.616	0.072728
0.617	0.072294
0.618	0.072248
0.618	0.072206
0.619	0.072377
0.62	0.073043
0.62	0.073108
0.621	0.072933
0.622	0.072757
0.622	0.072613
0.623	0.073017
0.624	0.073651
0.624	0.074304
0.625	0.07489
0.626	0.075408
0.626	0.076018
0.627	0.076657
0.628	0.077294
0.628	0.077193
0.629	0.076383
0.63	0.075388
0.63	0.07438
0.631	0.073488
0.632	0.073374
0.632	0.073846
0.633	0.074443
0.634	0.07504
0.634	0.075374
0.635	0.074389
0.636	0.072702
0.636	0.070951
0.637	0.069211
0.638	0.068012
0.638	0.067873
0.639	0.068149
0.64	0.068426
0.64	0.068988
0.641	0.069783
0.641	0.070591
0.642	0.07139
0.643	0.072159
0.643	0.072487
0.644	0.07239
0.645	0.072192
0.645	0.071994
0.646	0.071578
0.647	0.071046
0.647	0.070498
0.648	0.06995
0.649	0.0695
0.649	0.07015
0.65	0.071195
0.651	0.072277
0.651	0.073354
0.652	0.07465
0.653	0.075423
0.653	0.07608
0.654	0.076734
0.655	0.07719
0.655	0.076768
0.656	0.076212
0.657	0.075654
0.657	0.075093
0.658	0.074823
0.659	0.074853
0.659	0.074912
0.66	0.074972
0.661	0.07489
0.661	0.074412
0.662	0.074121
0.663	0.073848
0.663	0.073576
0.664	0.073834
0.665	0.073838
0.665	0.073824
0.666	0.073811
0.667	0.073643
0.667	0.073488
0.668	0.073497
0.668	0.073511
0.669	0.073527
0.67	0.074149
0.67	0.074801
0.671	0.07543
0.672	0.076014
0.672	0.076613
0.673	0.076976
0.674	0.077065
0.674	0.077076
0.675	0.077086
0.676	0.076658
0.676	0.076419
0.677	0.076236
0.678	0.076052
0.678	0.076208
0.679	0.077207
0.68	0.078491
0.68	0.079774
0.681	0.080781
0.682	0.080114
0.682	0.07852
0.683	0.076938
0.684	0.075507
0.684	0.074684
0.685	0.074084
0.686	0.073227
0.686	0.07237
0.687	0.071498
0.688	0.07081
0.688	0.070783
0.689	0.070756
0.69	0.070666
0.69	0.070307
0.691	0.069633
0.692	0.068881
0.692	0.06813
0.693	0.06753
0.693	0.06773
0.694	0.068995
0.695	0.070262
0.695	0.071514
0.696	0.072537
0.697	0.072882
0.697	0.072984
0.698	0.073088
0.699	0.073233
0.699	0.073604
0.7	0.074272
0.701	0.074941
0.701	0.07565
0.702	0.076344
0.703	0.07663
0.703	0.076867
0.704	0.077063
0.705	0.07677
0.705	0.075526
0.706	0.074264
0.707	0.072993
0.707	0.071705
0.708	0.070578
0.709	0.069826
0.709	0.069118
0.71	0.068583
0.711	0.068575
0.711	0.068712
0.712	0.068573
0.713	0.068434
0.713	0.068197
0.714	0.068595
0.715	0.069766
0.715	0.070929
0.716	0.072008
0.717	0.07237
0.717	0.071627
0.718	0.070436
0.718	0.06924
0.719	0.067542
0.72	0.065354
0.72	0.063122
0.721	0.060902
0.722	0.058902
0.722	0.058061
0.723	0.058198
0.724	0.05841
0.724	0.058615
0.725	0.058342
0.726	0.057125
0.726	0.055032
0.727	0.052784
0.728	0.05047
0.728	0.048283
0.729	0.046599
0.73	0.04496
0.73	0.043332
0.731	0.041707
0.732	0.040162
0.732	0.038625
0.733	0.037097
0.734	0.0356
0.734	0.034352
0.735	0.033429
0.736	0.032414
0.736	0.031399
0.737	0.030358
0.738	0.029033
0.738	0.02876
0.739	0.028487
0.74	0.028214
0.74	0.02798
0.741	0.027952
0.742	0.027949
0.742	0.027945
0.743	0.027942
0.744	0.027773
0.744	0.026808
0.745	0.025837
0.745	0.02486
0.746	0.023876
0.747	0.024402
0.747	0.024982
0.748	0.025564
0.749	0.026144
0.749	0.026441
0.75	0.0269
0.751	0.02736
0.751	0.027823
0.752	0.028259
0.753	0.028378
0.753	0.028882
0.754	0.029382
0.755	0.029899
0.755	0.030407
0.756	0.02993
0.757	0.029453
0.757	0.02898
0.758	0.028798
0.759	0.030348
0.759	0.032649
0.76	0.034956
0.761	0.037138
0.761	0.038669
0.762	0.03943
0.763	0.04019
0.763	0.040955
0.764	0.041537
0.765	0.041557
0.765	0.041442
0.766	0.041328
0.767	0.041197
0.767	0.041125
0.768	0.041177
0.769	0.041228
0.769	0.04128
0.77	0.041096
0.77	0.040605
0.771	0.040054
0.772	0.039506
0.772	0.039162
0.773	0.039296
0.774	0.039719
0.774	0.04014
0.775	0.040561
0.776	0.041023
0.776	0.041504
0.777	0.041908
0.778	0.042303
0.778	0.04277
0.779	0.043464
0.78	0.043664
0.78	0.043881
0.781	0.044107
0.782	0.044335
0.782	0.045101
0.783	0.046367
0.784	0.04767
0.784	0.048976
0.785	0.050497
0.786	0.053362
0.786	0.056248
0.787	0.059123
0.788	0.061734
0.788	0.063469
0.789	0.064761
0.79	0.066052
0.79	0.067494
0.791	0.069041
0.792	0.070464
0.792	0.071837
0.793	0.073211
0.794	0.074022
0.794	0.074676
0.795	0.075535
0.795	0.076389
0.796	0.07724
0.797	0.078421
0.797	0.079915
0.798	0.081482
0.799	0.083041
0.799	0.084115
0.8	0.084304
0.801	0.084083
0.801	0.083862
0.802	0.083517
0.803	0.083263
0.803	0.083346
0.804	0.083556
0.805	0.083767
0.805	0.084116
0.806	0.084325
0.807	0.084208
0.807	0.08409
0.808	0.083962
0.809	0.083637
0.809	0.083098
0.81	0.082539
0.811	0.081979
0.811	0.081782
0.812	0.081665
0.813	0.081277
0.813	0.08089
0.814	0.080526
0.815	0.080135
0.815	0.079688
0.816	0.079228
0.817	0.078705
0.817	0.077554
0.818	0.0759
0.819	0.07418
0.819	0.072458
0.82	0.070627
0.821	0.068854
0.821	0.067209
0.822	0.065604
0.822	0.063981
0.823	0.062066
0.824	0.059677
0.824	0.057092
0.825	0.054512
0.826	0.052717
0.826	0.052488
0.827	0.052831
0.828	0.053172
0.828	0.053035
0.829	0.051964
0.83	0.050582
0.83	0.049202
0.831	0.047852
0.832	0.046835
0.832	0.046346
0.833	0.046194
0.834	0.046125
0.834	0.046194
0.835	0.046729
0.836	0.047811
0.836	0.049285
0.837	0.050731
0.838	0.051841
0.838	0.05213
0.839	0.051872
0.84	0.051558
0.84	0.051556
0.841	0.052394
0.842	0.053555
0.842	0.054732
0.843	0.055892
0.844	0.056841
0.844	0.057055
0.845	0.056366
0.846	0.055575
0.846	0.054601
0.847	0.05279
0.847	0.050617
0.848	0.048419
0.849	0.046251
0.849	0.044294
0.85	0.042924
0.851	0.04235
0.851	0.041773
0.852	0.041383
0.853	0.042015
0.853	0.043221
0.854	0.044525
0.855	0.045841
0.855	0.047074
0.856	0.047972
0.857	0.048958
0.857	0.049949
0.858	0.050836
0.859	0.050976
0.859	0.049854
0.86	0.048525
0.861	0.047195
0.861	0.046016
0.862	0.045517
0.863	0.045702
0.863	0.045887
0.864	0.046057
0.865	0.046004
0.865	0.045683
0.866	0.045362
0.867	0.04503
0.867	0.044333
0.868	0.043128
0.869	0.041775
0.869	0.040421
0.87	0.039096
0.871	0.038216
0.871	0.037704
0.872	0.037194
0.872	0.036686
0.873	0.035812
0.874	0.034389
0.874	0.032766
0.875	0.031149
0.876	0.029561
0.876	0.028349
0.877	0.027412
0.878	0.026477
0.878	0.025547
0.879	0.025173
0.88	0.025452
0.88	0.025901
0.881	0.02635
0.882	0.026886
0.882	0.027365
0.883	0.02777
0.884	0.028175
0.884	0.028464
0.885	0.027602
0.886	0.02594
0.886	0.024096
0.887	0.02214
0.888	0.020267
0.888	0.018994
0.889	0.0181
0.89	0.017203
0.89	0.016308
0.891	0.015678
0.892	0.015531
0.892	0.015556
0.893	0.015581
0.894	0.016929
0.894	0.018858
0.895	0.020825
0.896	0.022783
0.896	0.024246
0.897	0.024906
0.898	0.025592
0.898	0.026268
0.899	0.026894
0.899	0.026685
0.9	0.026729
0.901	0.026772
0.901	0.026835
0.902	0.027152
0.903	0.02769
0.903	0.028275
0.904	0.028859
0.905	0.029284
0.905	0.02876
0.906	0.027892
0.907	0.027026
0.907	0.026177
0.908	0.025719
0.909	0.02543
0.909	0.025146
0.91	0.02487
0.911	0.024799
0.911	0.025146
0.912	0.025465
0.913	0.025784
0.913	0.026038
0.914	0.025616
0.915	0.024733
0.915	0.023674
0.916	0.022597
0.917	0.021565
0.917	0.020817
0.918	0.020659
0.919	0.0205
0.919	0.020394
0.92	0.020367
0.921	0.019976
0.921	0.019471
0.922	0.018988
0.923	0.01875
0.923	0.018989
0.924	0.019219
0.924	0.019449
0.925	0.019775
0.926	0.019828
0.926	0.018864
0.927	0.017903
0.928	0.016955
0.928	0.016268
0.929	0.016305
0.93	0.016855
0.93	0.017405
0.931	0.01754
0.932	0.017183
0.932	0.01723
0.933	0.017278
0.934	0.017337
0.934	0.017349
0.935	0.017179
0.936	0.016901
0.936	0.016625
0.937	0.016445
0.938	0.016821
0.938	0.017781
0.939	0.018683
0.94	0.019615
0.94	0.020975
0.941	0.022704
0.942	0.024297
0.942	0.025899
0.943	0.027404
0.944	0.027355
0.944	0.026885
0.945	0.026416
0.946	0.025959
0.946	0.025698
0.947	0.026237
0.948	0.026926
0.948	0.027612
0.949	0.028231
0.949	0.028004
0.95	0.027676
0.951	0.027349
0.951	0.027026
0.952	0.026953
0.953	0.027236
0.953	0.027367
0.954	0.027499
0.955	0.027629
0.955	0.029113
0.956	0.030158
0.957	0.031195
0.957	0.032227
0.958	0.033134
0.959	0.033214
0.959	0.033141
0.96	0.033064
0.961	0.032987
0.961	0.032396
0.962	0.031523
0.963	0.030647
0.963	0.029766
0.964	0.028947
0.965	0.029148
0.965	0.029606
0.966	0.030071
0.967	0.030422
0.967	0.030009
0.968	0.029361
0.969	0.028713
0.969	0.028071
0.97	0.027429
0.971	0.026709
0.971	0.025962
0.972	0.025215
0.973	0.025107
0.973	0.026465
0.974	0.027325
0.975	0.028179
0.975	0.028624
0.976	0.028415
0.976	0.028597
0.977	0.028779
0.978	0.02896
0.978	0.029175
0.979	0.029392
0.98	0.029526
0.98	0.02966
0.981	0.029876
0.982	0.03071
0.982	0.032309
0.983	0.033967
0.984	0.035621
0.984	0.036794
0.985	0.036997
0.986	0.036791
0.986	0.036584
0.987	0.036495
0.988	0.036099
0.988	0.035019
0.989	0.033844
0.99	0.032665
0.99	0.031852
0.991	0.03175
0.992	0.031965
0.992	0.032167
0.993	0.03237
0.994	0.032701
0.994	0.03349
0.995	0.034408
0.996	0.035332
0.996	0.036442
0.997	0.038043
0.998	0.039752
0.998	0.041461
0.999	0.042897
1	0.044008
1	0.045218
1.001	0.046511
1.001	0.047796
1.002	0.04849
1.003	0.048921
1.003	0.04934
1.004	0.049754
1.005	0.050372
1.005	0.048779
1.006	0.046829
1.007	0.044867
1.007	0.043
1.008	0.042785
1.009	0.043517
1.009	0.044334
1.01	0.045147
1.011	0.045908
1.011	0.046461
1.012	0.046938
1.013	0.047407
1.013	0.047876
1.014	0.048181
1.015	0.048191
1.015	0.048159
1.016	0.048126
1.017	0.046814
1.017	0.04589
1.018	0.045168
1.019	0.044459
1.019	0.043912
1.02	0.043401
1.021	0.042536
1.021	0.041599
1.022	0.040677
1.023	0.041799
1.023	0.043089
1.024	0.044295
1.025	0.045507
1.025	0.046178
1.026	0.045535
1.026	0.044764
1.027	0.043988
1.028	0.043216
1.028	0.042551
1.029	0.041322
1.03	0.040032
1.03	0.038737
1.031	0.037573
1.032	0.037284
1.032	0.037776
1.033	0.038278
1.034	0.038717
1.034	0.038462
1.035	0.038714
1.036	0.038968
1.036	0.03923
1.037	0.039553
1.038	0.039803
1.038	0.03991
1.039	0.040017
1.04	0.040063
1.04	0.039557
1.041	0.038475
1.042	0.037389
1.042	0.036351
1.043	0.035736
1.044	0.035685
1.044	0.035657
1.045	0.03563
1.046	0.035625
1.046	0.036237
1.047	0.036928
1.048	0.037683
1.048	0.038461
1.049	0.039125
1.05	0.04078
1.05	0.042896
1.051	0.045054
1.052	0.047168
1.052	0.048741
1.053	0.049928
1.053	0.051046
1.054	0.052161
1.055	0.053288
1.055	0.052759
1.056	0.051256
1.057	0.049599
1.057	0.047879
1.058	0.045968
1.059	0.044861
1.059	0.044164
1.06	0.043468
1.061	0.044108
1.061	0.045936
1.062	0.048023
1.063	0.050106
1.063	0.05179
1.064	0.05159
1.065	0.05022
1.065	0.048744
1.066	0.047258
1.067	0.046416
1.067	0.04661
1.068	0.047305
1.069	0.048073
1.069	0.048772
1.07	0.049229
1.071	0.04946
1.071	0.049638
1.072	0.049814
1.073	0.050041
1.073	0.050639
1.074	0.051405
1.075	0.05218
1.075	0.052974
1.076	0.053531
1.077	0.053569
1.077	0.053477
1.078	0.053385
1.078	0.053362
1.079	0.052764
1.08	0.05197
1.08	0.051166
1.081	0.04977
1.082	0.047504
1.082	0.045289
1.083	0.043065
1.084	0.040862
1.084	0.038503
1.085	0.036573
1.086	0.0347
1.086	0.032827
1.087	0.031435
1.088	0.030383
1.088	0.029344
1.089	0.028298
1.09	0.027424
1.09	0.028092
1.091	0.029587
1.092	0.03108
1.092	0.032573
1.093	0.03287
1.094	0.030619
1.094	0.027532
1.095	0.024428
1.096	0.02173
1.096	0.020974
1.097	0.022638
1.098	0.024302
1.098	0.025934
1.099	0.027289
1.1	0.027542
1.1	0.027599
1.101	0.027635
1.102	0.027553
1.102	0.026395
1.103	0.025185
1.103	0.024008
1.104	0.022829
1.105	0.022599
1.105	0.02325
1.106	0.023895
1.107	0.024538
1.107	0.024941
1.108	0.024376
1.109	0.023655
1.109	0.022936
1.11	0.022375
1.111	0.022352
1.111	0.022716
1.112	0.023066
1.113	0.023412
1.113	0.023394
1.114	0.023254
1.115	0.023717
1.115	0.024179
1.116	0.02504
1.117	0.02683
1.117	0.029123
1.118	0.031424
1.119	0.0337
1.119	0.035387
1.12	0.036107
1.121	0.036621
1.121	0.037135
1.122	0.037828
1.123	0.038642
1.123	0.039135
1.124	0.039631
1.125	0.040126
1.125	0.040987
1.126	0.042642
1.127	0.044593
1.127	0.04655
1.128	0.048107
1.129	0.048295
1.129	0.047362
1.13	0.04643
1.13	0.045497
1.131	0.044983
1.132	0.045065
1.132	0.045246
1.133	0.045427
1.134	0.045635
1.134	0.04653
1.135	0.048045
1.136	0.049554
1.136	0.051127
1.137	0.052847
1.138	0.054127
1.138	0.055028
1.139	0.055923
1.14	0.056555
1.14	0.057514
1.141	0.058863
1.142	0.060253
1.142	0.061688
1.143	0.063285
1.144	0.064504
1.144	0.065485
1.145	0.066465
1.146	0.066972
1.146	0.067978
1.147	0.069363
1.148	0.070744
1.148	0.072238
1.149	0.074124
1.15	0.075751
1.15	0.077154
1.151	0.078561
1.152	0.079586
1.152	0.08051
1.153	0.081451
1.154	0.082386
1.154	0.083378
1.155	0.084318
1.155	0.084684
1.156	0.084369
1.157	0.084054
1.157	0.083465
1.158	0.082227
1.159	0.08088
1.159	0.079536
1.16	0.078201
1.161	0.077135
1.161	0.076791
1.162	0.076888
1.163	0.076984
1.163	0.077095
1.164	0.077044
1.165	0.076474
1.165	0.075907
1.166	0.075365
1.167	0.074997
1.167	0.074945
1.168	0.074967
1.169	0.074989
1.169	0.074898
1.17	0.074081
1.171	0.072234
1.171	0.070383
1.172	0.068572
1.173	0.067062
1.173	0.06624
1.174	0.065655
1.175	0.065065
1.175	0.064188
1.176	0.061868
1.177	0.059011
1.177	0.056127
1.178	0.053404
1.179	0.051449
1.179	0.050472
1.18	0.049849
1.18	0.04923
1.181	0.048508
1.182	0.04707
1.182	0.044596
1.183	0.042121
1.184	0.039506
1.184	0.036662
1.185	0.034121
1.186	0.031984
1.186	0.029845
1.187	0.027722
1.188	0.025518
1.188	0.023203
1.189	0.020883
1.19	0.018701
1.19	0.017593
1.191	0.017724
1.192	0.018051
1.192	0.018378
1.193	0.018596
1.194	0.018586
1.194	0.018459
1.195	0.018332
1.196	0.018205
1.196	0.018347
1.197	0.018737
1.198	0.01912
1.198	0.019503
1.199	0.019547
1.2	0.018959
1.2	0.018092
1.201	0.017223
1.202	0.016354
1.202	0.016346
1.203	0.017099
1.204	0.017951
1.204	0.018801
1.205	0.019342
1.206	0.019112
1.206	0.018564
1.207	0.018025
1.207	0.017461
1.208	0.017214
1.209	0.017673
1.209	0.018103
1.21	0.018536
1.211	0.018698
1.211	0.018376
1.212	0.017884
1.213	0.017393
1.213	0.016937
1.214	0.016982
1.215	0.017223
1.215	0.017468
1.216	0.01771
1.217	0.018389
1.217	0.019719
1.218	0.021093
1.219	0.022456
1.219	0.023638
1.22	0.024024
1.221	0.024398
1.221	0.02477
1.222	0.02513
1.223	0.02492
1.223	0.023554
1.224	0.022208
1.225	0.020861
1.225	0.019759
1.226	0.019244
1.227	0.018859
1.227	0.018467
1.228	0.018086
1.229	0.017471
1.229	0.016284
1.23	0.015095
1.231	0.013902
1.231	0.012185
1.232	0.010389
1.232	0.008928
1.233	0.007477
1.234	0.006067
1.234	0.004991
1.235	0.002976
1.236	0.000834
1.236	-0.0013
1.237	-0.00316
1.238	-0.0045
1.238	-0.00525
1.239	-0.00601
1.24	-0.00675
1.24	-0.0075
1.241	-0.00784
1.242	-0.00813
1.242	-0.00837
1.243	-0.00811
1.244	-0.00733
1.244	-0.00661
1.245	-0.00589
1.246	-0.00523
1.246	-0.00486
1.247	-0.00489
1.248	-0.00492
1.248	-0.0051
1.249	-0.00601
1.25	-0.0074
1.25	-0.00885
1.251	-0.01031
1.252	-0.01182
1.252	-0.01331
1.253	-0.01422
1.254	-0.01513
1.254	-0.0158
1.255	-0.01547
1.256	-0.01455
1.256	-0.01358
1.257	-0.01263
1.257	-0.01186
1.258	-0.01169
1.259	-0.01182
1.259	-0.01194
1.26	-0.01205
1.261	-0.01247
1.261	-0.01285
1.262	-0.01323
1.263	-0.01362
1.263	-0.01396
1.264	-0.01344
1.265	-0.01232
1.265	-0.01112
1.266	-0.00993
1.267	-0.00875
1.267	-0.00787
1.268	-0.00702
1.269	-0.00618
1.269	-0.00532
1.27	-0.00459
1.271	-0.00408
1.271	-0.00361
1.272	-0.00315
1.273	-0.00223
1.273	-0.00107
1.274	0.000144
1.275	0.001361
1.275	0.002423
1.276	0.002455
1.277	0.001621
1.277	0.000593
1.278	-0.00044
1.279	-0.00047
1.279	0.000316
1.28	0.001262
1.281	0.00221
1.281	0.0027
1.282	0.00252
1.283	0.002551
1.283	0.002709
1.284	0.002867
1.284	0.004179
1.285	0.006383
1.286	0.00875
1.286	0.011114
1.287	0.013062
1.288	0.013401
1.288	0.013051
1.289	0.012623
1.29	0.012192
1.29	0.011978
1.291	0.012207
1.292	0.012482
1.292	0.012761
1.293	0.013079
1.294	0.013827
1.294	0.014743
1.295	0.015663
1.296	0.016588
1.296	0.018176
1.297	0.019666
1.298	0.021148
1.298	0.022628
1.299	0.024062
1.3	0.025285
1.3	0.026493
1.301	0.027704
1.302	0.028898
1.302	0.029716
1.303	0.030363
1.304	0.031003
1.304	0.031659
1.305	0.032458
1.306	0.033288
1.306	0.033984
1.307	0.034676
1.308	0.035299
1.308	0.035328
1.309	0.035594
1.309	0.03586
1.31	0.036127
1.311	0.036131
1.311	0.034698
1.312	0.032954
1.313	0.031317
1.313	0.029776
1.314	0.028889
1.315	0.029439
1.315	0.030221
[truncated: 47,882 more rows]
