# Supplementary material for: Purified zymogens reveal mechanisms of snake venom metalloproteinase auto-activation
Source: eLife. 2026 Jun 10;15:RP109112. doi: 10.7554/eLife.109112 (PMC13252954; doi:10.7554/eLife.109112)
Supplement: Figure 3—figure supplement 6—source data 3. [file elife-109112-fig3-figsupp6-data3.xlsx]

## Sheet: 9a
Protein FDR Confidence	Accession	Description	Contaminant	SVMP7+hPDI+sPDI	Hi5	Coverage	# Peptides	# PSMs	# Unique Peptides	Area: F4: Sample	Score Sequest HT
High	sPDI	sPDI sPDI	FALSE	TRUE	FALSE	74.7573	39	764	39	33529221181	1699.08
High	P00761	Trypsin OS=Sus scrofa PE=1 SV=1	TRUE	FALSE	FALSE	7.79221	2	45	2	8.99869e+09	19.28
High	SVMP7	SVMP7 SVMP7	FALSE	TRUE	FALSE	57.8616	31	108	31	2.49932e+09	308.03
High	A0A7E5VVN0	T-complex protein 1 subunit delta OS=Trichoplusia ni OX=7111 GN=LOC113497142 PE=3 SV=1	FALSE	FALSE	TRUE	49.9076	23	46	23	5.91352e+08	130.49
High	A0A7E5WZQ1	T-complex protein 1 subunit eta OS=Trichoplusia ni OX=7111 GN=LOC113507248 PE=3 SV=1	FALSE	FALSE	TRUE	54.2279	24	48	24	5.60393e+08	125.74
High	A0A7E5X1U5	T-complex protein 1 subunit beta OS=Trichoplusia ni OX=7111 GN=LOC113508363 PE=3 SV=1	FALSE	FALSE	TRUE	60.8209	29	60	29	4.98296e+08	158.19
High	A0A7E5WP28	T-complex protein 1 subunit epsilon OS=Trichoplusia ni OX=7111 GN=LOC113504153 PE=3 SV=1	FALSE	FALSE	TRUE	46.679	26	47	26	3.71941e+08	105.22
High	A0A7E5W0E1	T-complex protein 1 subunit theta OS=Trichoplusia ni OX=7111 GN=LOC113498305 PE=3 SV=1	FALSE	FALSE	TRUE	59.4495	31	60	31	3.64952e+08	123.4
High	A0A7E5W8Q1	Pyruvate kinase OS=Trichoplusia ni OX=7111 GN=LOC113500423 PE=3 SV=1	FALSE	FALSE	TRUE	59.3928	23	46	23	3.63635e+08	107.9
High	A0A7E5WAY7	Protein disulfide-isomerase OS=Trichoplusia ni OX=7111 GN=LOC113501048 PE=3 SV=1	FALSE	FALSE	TRUE	44.7368	25	41	25	3.61662e+08	104.42
High	A0A7E5VV65	T-complex protein 1 subunit alpha OS=Trichoplusia ni OX=7111 GN=LOC113496858 PE=3 SV=1	FALSE	FALSE	TRUE	42.9603	22	40	22	3.26416e+08	96.73
High	A0A7E5WEJ6	Protein disulfide-isomerase OS=Trichoplusia ni OX=7111 GN=LOC113501793 PE=3 SV=1	FALSE	FALSE	TRUE	46.9388	22	25	22	2.85822e+08	63.02
High	A0A7E5W7G3	Neurofilament heavy polypeptide-like OS=Trichoplusia ni OX=7111 GN=LOC113499990 PE=4 SV=1	FALSE	FALSE	TRUE	59.8174	24	36	24	2.6646e+08	96.25
High	A0A7E5WJN2	T-complex protein 1 subunit gamma OS=Trichoplusia ni OX=7111 GN=LOC113503333 PE=3 SV=1	FALSE	FALSE	TRUE	55.4529	31	43	31	2.57816e+08	115.89
High	A0A7E5WMD6	Synaptic vesicle membrane protein VAT-1 homolog-like isoform X1 OS=Trichoplusia ni OX=7111 GN=LOC113503902 PE=3 SV=1	FALSE	FALSE	TRUE	50.2119	19	31	19	2.5723e+08	88.41
High	A0A7E5VT10	T-complex protein 1 subunit zeta OS=Trichoplusia ni OX=7111 GN=LOC113496326 PE=3 SV=1	FALSE	FALSE	TRUE	42.5612	22	33	22	2.17928e+08	73.95
High	A0A7E5VJE9	Glucose-6-phosphate isomerase OS=Trichoplusia ni OX=7111 GN=LOC113494316 PE=3 SV=1	FALSE	FALSE	TRUE	41.1871	19	37	19	2.13819e+08	106.15
High	A0A7E5W552	inositol-3-phosphate synthase OS=Trichoplusia ni OX=7111 GN=LOC113499177 PE=3 SV=1	FALSE	FALSE	TRUE	48.2536	14	25	14	1.95624e+08	61.82
High	A0A7E5VWM7	Leukocyte elastase inhibitor-like isoform X1 OS=Trichoplusia ni OX=7111 GN=LOC113497357 PE=3 SV=1	FALSE	FALSE	TRUE	25.9825	10	16	10	1.7841e+08	38.1
High	A0A7E5VI30	Insulin-like growth factor 2 mRNA-binding protein 1 isoform X1 OS=Trichoplusia ni OX=7111 GN=LOC113494044 PE=3 SV=1	FALSE	FALSE	TRUE	42.9104	23	31	23	1.51849e+08	73.19
High	A0A7E5W672	Aspartate--tRNA ligase, cytoplasmic OS=Trichoplusia ni OX=7111 GN=LOC113499807 PE=3 SV=1	FALSE	FALSE	TRUE	59.7015	27	36	27	1.49889e+08	84.56
High	A0A7E5WSW3	Translation elongation factor 2-like OS=Trichoplusia ni OX=7111 GN=LOC113505410 PE=3 SV=1	FALSE	FALSE	TRUE	31.872	26	40	26	1.42646e+08	95.88
High	A0A7E5WY23	Heat shock 70 kDa protein cognate 4 OS=Trichoplusia ni OX=7111 GN=LOC113506423 PE=2 SV=1	FALSE	FALSE	TRUE	38.685	23	42	16	1.36449e+08	99.9
High	A0A7E5VKT5	Serine/threonine-protein phosphatase PP2A 65 kDa regulatory subunit OS=Trichoplusia ni OX=7111 GN=LOC113494680 PE=4 SV=1	FALSE	FALSE	TRUE	44.7458	22	28	22	1.30227e+08	67.51
High	A0A7E5X2D5	Hypoxia up-regulated protein 1 OS=Trichoplusia ni OX=7111 GN=LOC113508064 PE=3 SV=1	FALSE	FALSE	TRUE	34.3921	27	39	27	1.18868e+08	98.45
High	A0A7E5VRS4	H(+)-transporting two-sector ATPase OS=Trichoplusia ni OX=7111 GN=LOC113496116 PE=3 SV=1	FALSE	FALSE	TRUE	49.2707	26	40	26	1.16359e+08	97.73
High	A0A7E5WLE7	Ubiquitin carboxyl-terminal hydrolase OS=Trichoplusia ni OX=7111 GN=LOC113503276 PE=3 SV=1	FALSE	FALSE	TRUE	35.4	16	18	16	1.11209e+08	44.65
High	A0A7E5VRR0	Serine protease K12H4.7 OS=Trichoplusia ni OX=7111 GN=LOC113496074 PE=3 SV=1	FALSE	FALSE	TRUE	33.8057	13	19	13	1.09846e+08	55.34
High	A0A7E5WLA2	Heat shock protein 60A-like OS=Trichoplusia ni OX=7111 GN=LOC113503680 PE=3 SV=1	FALSE	FALSE	TRUE	46.5035	22	28	22	1.07052e+08	65.44
High	A0A7E5VKN5	Uncharacterized protein LOC113494674 OS=Trichoplusia ni OX=7111 GN=LOC113494674 PE=4 SV=1	FALSE	FALSE	TRUE	29.3436	17	21	17	1.00956e+08	44.27
High	A0A7E5WIQ6	asparagine--tRNA ligase OS=Trichoplusia ni OX=7111 GN=LOC113503013 PE=4 SV=1	FALSE	FALSE	TRUE	39.7112	17	24	17	9.37239e+07	56.99
High	A0A7E5WRU4	Coatomer subunit delta OS=Trichoplusia ni OX=7111 GN=LOC113505136 PE=3 SV=1	FALSE	FALSE	TRUE	42.3762	17	23	17	9.21777e+07	57.65
High	P04264	Keratin, type II cytoskeletal 1 OS=Homo sapiens GN=KRT1 PE=1 SV=6	TRUE	FALSE	FALSE	44.2547	27	31	20	9.05223e+07	82.88
High	A0A7E5VUJ5	Eukaryotic translation initiation factor 3 subunit L OS=Trichoplusia ni OX=7111 GN=LOC113496841 PE=3 SV=1	FALSE	FALSE	TRUE	27.8085	14	19	14	8.93953e+07	44.54
High	A0A7E5VSK5	Heat shock protein 83 OS=Trichoplusia ni OX=7111 GN=LOC113496266 PE=3 SV=1	FALSE	FALSE	TRUE	39.0582	32	48	30	8.88726e+07	116.54
High	A0A7E5W6G7	Transketolase-like protein 2 OS=Trichoplusia ni OX=7111 GN=LOC113499721 PE=4 SV=1	FALSE	FALSE	TRUE	31.9936	18	22	18	8.19318e+07	55.36
High	P35527	Keratin, type I cytoskeletal 9 OS=Homo sapiens GN=KRT9 PE=1 SV=3	TRUE	FALSE	FALSE	25.2006	12	18	11	8.07738e+07	49.84
High	A0A7E5VGP8	Multifunctional fusion protein OS=Trichoplusia ni OX=7111 GN=LOC113493698 PE=3 SV=1	FALSE	FALSE	TRUE	41.1661	21	24	21	7.69234e+07	51.73
High	A0A7E5WBV4	Moesin/ezrin/radixin homolog 1 OS=Trichoplusia ni OX=7111 GN=LOC113501302 PE=4 SV=1	FALSE	FALSE	TRUE	49.1582	31	40	31	7.24017e+07	86.47
High	P13645	Keratin, type I cytoskeletal 10 OS=Homo sapiens GN=KRT10 PE=1 SV=6	TRUE	FALSE	FALSE	40.2397	24	34	21	7.16167e+07	77.43
High	A0A7E5VQ37	Leucine-rich repeat-containing protein 47-like OS=Trichoplusia ni OX=7111 GN=LOC113495731 PE=4 SV=1	FALSE	FALSE	TRUE	45.4373	22	31	22	6.93377e+07	72.74
High	A0A7E5W0X5	Uncharacterized protein LOC113498223 OS=Trichoplusia ni OX=7111 GN=LOC113498223 PE=3 SV=1	FALSE	FALSE	TRUE	7.68742	10	12	9	6.27902e+07	31.68
High	A0A7E5WQA3	Serine/threonine-protein phosphatase 5 OS=Trichoplusia ni OX=7111 GN=LOC113504717 PE=3 SV=1	FALSE	FALSE	TRUE	37.7551	19	27	19	6.27115e+07	54.76
High	A0A7E5WBQ7	Glucose-6-phosphate 1-dehydrogenase OS=Trichoplusia ni OX=7111 GN=LOC113501060 PE=3 SV=1	FALSE	FALSE	TRUE	28.3401	14	17	14	5.99241e+07	36.84
High	A0A7E5VUR1	glutamate dehydrogenase [NAD(P)(+)] OS=Trichoplusia ni OX=7111 GN=LOC113496832 PE=3 SV=1	FALSE	FALSE	TRUE	33.935	17	24	17	5.99229e+07	54.87
High	A0A7E5X2A1	histidine--tRNA ligase OS=Trichoplusia ni OX=7111 GN=LOC113508450 PE=3 SV=1	FALSE	FALSE	TRUE	34.2149	21	22	20	5.92971e+07	51.88
High	A0A7E5WD39	UTP--glucose-1-phosphate uridylyltransferase OS=Trichoplusia ni OX=7111 GN=LOC113501660 PE=3 SV=1	FALSE	FALSE	TRUE	27.8311	13	14	13	5.54865e+07	35.49
High	A0A7E5WL71	phosphoglucomutase (alpha-D-glucose-1,6-bisphosphate-dependent) OS=Trichoplusia ni OX=7111 GN=LOC113503659 PE=3 SV=1	FALSE	FALSE	TRUE	38.9982	17	24	17	5.39059e+07	64.04
High	A0A7E5X472	Inosine-5'-monophosphate dehydrogenase OS=Trichoplusia ni OX=7111 GN=LOC113508532 PE=3 SV=1	FALSE	FALSE	TRUE	25.3906	11	13	11	5.20023e+07	31.54
High	A0A7E5VBG0	H/ACA ribonucleoprotein complex subunit 4-like OS=Trichoplusia ni OX=7111 GN=LOC113492352 PE=3 SV=1	FALSE	FALSE	TRUE	24.1245	10	12	10	5.09448e+07	29.76
High	A0A7E5VFZ4	Luciferin 4-monooxygenase-like OS=Trichoplusia ni OX=7111 GN=LOC113493425 PE=3 SV=1	FALSE	FALSE	TRUE	44.9438	22	31	22	4.90675e+07	65.62
High	A0A7E5VYG1	arginine--tRNA ligase OS=Trichoplusia ni OX=7111 GN=LOC113497820 PE=3 SV=1	FALSE	FALSE	TRUE	34.8463	23	25	23	4.79077e+07	54.92
High	A0A7E5WDH8	Lysosomal Pro-X carboxypeptidase OS=Trichoplusia ni OX=7111 GN=LOC113501510 PE=3 SV=1	FALSE	FALSE	TRUE	27.8723	13	16	13	4.48755e+07	32.24
High	A0A7E5VP07	Methionine aminopeptidase 2 OS=Trichoplusia ni OX=7111 GN=LOC113495468 PE=3 SV=1	FALSE	FALSE	TRUE	35.1931	14	15	14	4.30955e+07	36.05
High	A0A7E5VJN9	type I protein arginine methyltransferase OS=Trichoplusia ni OX=7111 GN=LOC113494393 PE=4 SV=1	FALSE	FALSE	TRUE	19.7368	8	10	8	4.25994e+07	20.62
High	A0A7E5WX35	LOW QUALITY PROTEIN: neutral alpha-glucosidase AB-like OS=Trichoplusia ni OX=7111 GN=LOC113506768 PE=3 SV=1	FALSE	FALSE	TRUE	21.444	17	21	17	3.94253e+07	48.4
High	A0A7E5X1F1	Heat shock protein 75 kDa, mitochondrial OS=Trichoplusia ni OX=7111 GN=LOC113508241 PE=3 SV=1	FALSE	FALSE	TRUE	14.5324	9	9	8	3.79333e+07	17.27
High	A0A7E5VN03	Asparagine synthetase [glutamine-hydrolyzing] OS=Trichoplusia ni OX=7111 GN=LOC113495260 PE=4 SV=1	FALSE	FALSE	TRUE	31.5217	14	17	14	3.73631e+07	40.53
High	A0A7E5VDC6	Inter-alpha-trypsin inhibitor heavy chain H4-like isoform X1 OS=Trichoplusia ni OX=7111 GN=LOC113492781 PE=4 SV=1	FALSE	FALSE	TRUE	19.1207	19	24	19	3.71335e+07	54.44
High	A0A7E5VQN8	Catalase OS=Trichoplusia ni OX=7111 GN=LOC113495760 PE=3 SV=1	FALSE	FALSE	TRUE	28.2051	13	15	13	3.70433e+07	31.95
High	A0A7E5VK19	Coronin OS=Trichoplusia ni OX=7111 GN=LOC113494470 PE=3 SV=1	FALSE	FALSE	TRUE	33.6177	17	23	17	3.62689e+07	60.66
High	A0A7E5VWU5	Stress-induced-phosphoprotein 1 OS=Trichoplusia ni OX=7111 GN=LOC113497453 PE=4 SV=1	FALSE	FALSE	TRUE	40.9594	23	26	23	3.57941e+07	55.61
High	A0A7E5X2K3	Rab proteins geranylgeranyltransferase component A OS=Trichoplusia ni OX=7111 GN=LOC113508531 PE=3 SV=1	FALSE	FALSE	TRUE	39.9247	18	21	18	3.3272e+07	42.72
High	A9XXA7	Elongation factor 1-alpha OS=Trichoplusia ni OX=7111 GN=LOC113501794 PE=2 SV=1	FALSE	FALSE	TRUE	16.6307	8	9	8	3.20291e+07	15.87
High	A0A7E5WSQ6	Cystathionine beta-synthase OS=Trichoplusia ni OX=7111 GN=LOC113504890 PE=4 SV=1	FALSE	FALSE	TRUE	31.1637	12	12	12	3.12879e+07	32.77
High	A0A7E5W7I0	Nucleosome assembly protein 1-like 1 isoform X1 OS=Trichoplusia ni OX=7111 GN=LOC113499831 PE=3 SV=1	FALSE	FALSE	TRUE	21.0526	6	9	6	3.10284e+07	21.84
High	A0A7E5WWH6	FK506-binding protein OS=Trichoplusia ni OX=7111 GN=LOC113506553 PE=3 SV=1	FALSE	FALSE	TRUE	30.0733	14	17	14	2.87871e+07	48.13
High	A0A7E5W1J7	Protein yellow OS=Trichoplusia ni OX=7111 GN=LOC113498622 PE=3 SV=1	FALSE	FALSE	TRUE	20.6972	9	10	9	2.82275e+07	22.6
High	A0A7E5VJH0	Esterase FE4-like OS=Trichoplusia ni OX=7111 GN=LOC113494328 PE=4 SV=1	FALSE	FALSE	TRUE	20.5714	10	11	10	27333922	23.35
High	A0A7E5VT50	Polyadenylate-binding protein OS=Trichoplusia ni OX=7111 GN=LOC113496349 PE=3 SV=1	FALSE	FALSE	TRUE	24.5499	14	17	14	2.70312e+07	38.01
High	Q0MUU6	Endoplasmic reticulum chaperone BiP OS=Trichoplusia ni OX=7111 GN=LOC113494618 PE=3 SV=1	FALSE	FALSE	TRUE	30.6525	19	24	14	2.63491e+07	59.89
High	A0A7E5VP60	Myrosinase 1-like OS=Trichoplusia ni OX=7111 GN=LOC113495436 PE=3 SV=1	FALSE	FALSE	TRUE	20.1581	9	11	9	2.63162e+07	29.12
High	A0A7E5WJL4	Vanin-like protein 3 OS=Trichoplusia ni OX=7111 GN=LOC113503224 PE=3 SV=1	FALSE	FALSE	TRUE	21.5213	9	11	6	2.62517e+07	28.75
High	A0A7E5WV00	serine--tRNA ligase OS=Trichoplusia ni OX=7111 GN=LOC113505465 PE=3 SV=1	FALSE	FALSE	TRUE	33.1984	14	19	14	2.55954e+07	54.22
High	A0A7E5WY89	Papilin-like isoform X1 OS=Trichoplusia ni OX=7111 GN=LOC113507179 PE=4 SV=1	FALSE	FALSE	TRUE	8.09061	21	21	21	2.48529e+07	51.9
High	P62979	Ubiquitin-40S ribosomal protein S27a OS=Homo sapiens GN=RPS27A PE=1 SV=2	TRUE	FALSE	TRUE	16.0256	2	2	2	2.39415e+07	6.48
High	A0A7E5W7A8	EH domain-containing protein 3 OS=Trichoplusia ni OX=7111 GN=LOC113499725 PE=4 SV=1	FALSE	FALSE	TRUE	40.7895	19	22	19	2.37908e+07	43.9
High	A0A7E5VTB7	RNA helicase OS=Trichoplusia ni OX=7111 GN=LOC113496465 PE=3 SV=1	FALSE	FALSE	TRUE	29.2115	16	20	11	2.33506e+07	43.21
High	P35908	Keratin, type II cytoskeletal 2 epidermal OS=Homo sapiens GN=KRT2 PE=1 SV=2	TRUE	FALSE	FALSE	38.1847	22	24	14	2.25394e+07	55.07
High	A0A7E5WWN6	Protein RCC2 homolog OS=Trichoplusia ni OX=7111 GN=LOC113506638 PE=4 SV=1	FALSE	FALSE	TRUE	14.9284	8	8	8	2.24124e+07	9.58
High	A0A7E5VD70	Eukaryotic translation initiation factor 2A OS=Trichoplusia ni OX=7111 GN=LOC113492764 PE=3 SV=1	FALSE	FALSE	TRUE	34.8592	19	20	19	2.21537e+07	46.11
High	A0A7E5WK18	Myelin expression factor 2 isoform X1 OS=Trichoplusia ni OX=7111 GN=LOC113503358 PE=4 SV=1	FALSE	FALSE	TRUE	23.7925	10	11	10	2.21357e+07	29.35
High	A0A7E5WSU8	vesicle-fusing ATPase OS=Trichoplusia ni OX=7111 GN=LOC113505390 PE=4 SV=1	FALSE	FALSE	TRUE	25.5583	17	19	17	2.19096e+07	45.34
High	A0A7E5VUD8	Glucosidase 2 subunit beta OS=Trichoplusia ni OX=7111 GN=LOC113496754 PE=4 SV=1	FALSE	FALSE	TRUE	24.9524	12	13	12	2.17046e+07	30.72
High	A0A7E5WRC0	Sorting nexin-2 isoform X1 OS=Trichoplusia ni OX=7111 GN=LOC113504885 PE=3 SV=1	FALSE	FALSE	TRUE	38.9722	15	15	15	2.16907e+07	35.55
High	A0A7E5WG79	Nicotinate phosphoribosyltransferase OS=Trichoplusia ni OX=7111 GN=LOC113502186 PE=3 SV=1	FALSE	FALSE	TRUE	20.132	11	12	11	2.14927e+07	25.17
High	A0A7E5WY30	Phenylalanine--tRNA ligase beta subunit OS=Trichoplusia ni OX=7111 GN=LOC113507104 PE=3 SV=1	FALSE	FALSE	TRUE	30.9402	16	18	16	2.12406e+07	44.94
High	A0A7E5WN37	Kinesin light chain OS=Trichoplusia ni OX=7111 GN=LOC113503845 PE=3 SV=1	FALSE	FALSE	TRUE	42.0863	19	24	2	2.09823e+07	63.98
High	A0A7E5VFS7	peptidylprolyl isomerase OS=Trichoplusia ni OX=7111 GN=LOC113493388 PE=4 SV=1	FALSE	FALSE	TRUE	34.5188	16	18	16	2.08196e+07	48.03
High	A0A7E5VP73	Phosphoacetylglucosamine mutase OS=Trichoplusia ni OX=7111 GN=LOC113495499 PE=3 SV=1	FALSE	FALSE	TRUE	39.781	17	21	17	2.04411e+07	48.47
High	A0A7E5VSX5	phenylalanine--tRNA ligase OS=Trichoplusia ni OX=7111 GN=LOC113496381 PE=3 SV=1	FALSE	FALSE	TRUE	29.1242	11	14	11	2.0426e+07	33.5
High	A0A7E5VFZ7	Protein nessun dorma OS=Trichoplusia ni OX=7111 GN=LOC113493434 PE=4 SV=1	FALSE	FALSE	TRUE	22.9572	10	12	10	2.02472e+07	32.77
High	A0A7E5VES6	Ras GTPase-activating protein-binding protein 2 OS=Trichoplusia ni OX=7111 GN=LOC113493164 PE=4 SV=1	FALSE	FALSE	TRUE	18.2232	7	7	7	1.9664e+07	10.38
High	A0A7E5V881	Neurofilament heavy polypeptide isoform X1 OS=Trichoplusia ni OX=7111 GN=LOC113491627 PE=3 SV=1	FALSE	FALSE	TRUE	23.5135	6	8	6	1.92531e+07	20.54
High	A0A7E5VH70	Clathrin heavy chain OS=Trichoplusia ni OX=7111 GN=LOC113493842 PE=3 SV=1	FALSE	FALSE	TRUE	12.9433	19	21	19	1.91408e+07	46
High	A0A7E5WJU5	Glucosylceramidase OS=Trichoplusia ni OX=7111 GN=LOC113503017 PE=3 SV=1	FALSE	FALSE	TRUE	5.57692	3	3	3	1.83473e+07	8.03
High	A0A7E5VE23	Kelch domain-containing protein 4 OS=Trichoplusia ni OX=7111 GN=LOC113492962 PE=4 SV=1	FALSE	FALSE	TRUE	34.0726	15	18	15	1.82676e+07	43.38
High	A0A7E5VHM2	Sulfhydryl oxidase OS=Trichoplusia ni OX=7111 GN=LOC113493962 PE=3 SV=1	FALSE	FALSE	TRUE	20.9139	9	11	9	1.79306e+07	33.09
High	A0A7E5VPU9	Uncharacterized protein LOC113495662 isoform X1 OS=Trichoplusia ni OX=7111 GN=LOC113495662 PE=4 SV=1	FALSE	FALSE	TRUE	18.3391	10	11	10	1.77737e+07	20.45
High	A0A7E5VK88	Carboxypeptidase OS=Trichoplusia ni OX=7111 GN=LOC113494524 PE=3 SV=1	FALSE	FALSE	TRUE	26.1506	11	13	11	1.76221e+07	23.44
High	A0A7E5X348	97 kDa heat shock protein isoform X1 OS=Trichoplusia ni OX=7111 GN=LOC113508321 PE=3 SV=1	FALSE	FALSE	TRUE	20.8831	15	16	15	1.69625e+07	38.84
High	A0A7E5VJU0	Probable aminopeptidase NPEPL1 isoform X1 OS=Trichoplusia ni OX=7111 GN=LOC113494458 PE=3 SV=1	FALSE	FALSE	TRUE	25	11	12	11	1.68792e+07	33.05
High	A0A7E5W093	Plastin-3 OS=Trichoplusia ni OX=7111 GN=LOC113498282 PE=4 SV=1	FALSE	FALSE	TRUE	22.6158	14	15	14	1.6838e+07	36.22
High	A0A7E5V8A9	Cytoplasmic aconitate hydratase-like OS=Trichoplusia ni OX=7111 GN=LOC113491646 PE=3 SV=1	FALSE	FALSE	TRUE	18.4978	15	15	15	1.61923e+07	33.08
High	A0A7E5VQM0	NEDD8-activating enzyme E1 regulatory subunit OS=Trichoplusia ni OX=7111 GN=LOC113495846 PE=3 SV=1	FALSE	FALSE	TRUE	27.9026	12	14	12	1.5387e+07	37.09
High	A0A7E5WD37	Nucleolar protein 58 OS=Trichoplusia ni OX=7111 GN=LOC113501219 PE=3 SV=1	FALSE	FALSE	TRUE	21.3084	9	10	9	1.52697e+07	25.78
High	A0A7E5VU84	Histone deacetylase OS=Trichoplusia ni OX=7111 GN=LOC113496752 PE=3 SV=1	FALSE	FALSE	TRUE	20.9877	9	9	9	1.49642e+07	19.82
High	A0A7E5V8N8	Laccase-5 OS=Trichoplusia ni OX=7111 GN=LOC113491714 PE=3 SV=1	FALSE	FALSE	TRUE	14.2105	9	11	9	1.47026e+07	31.79
High	A0A7E5X035	Protein cueball-like OS=Trichoplusia ni OX=7111 GN=LOC113507793 PE=4 SV=1	FALSE	FALSE	TRUE	10.5983	5	6	5	1.46679e+07	17.06
High	A0A7E5VL21	Eukaryotic translation initiation factor 3 subunit B OS=Trichoplusia ni OX=7111 GN=LOC113494682 PE=3 SV=1	FALSE	FALSE	TRUE	9.62644	7	7	7	1.44243e+07	15.93
High	A0A7E5WQX0	AMP deaminase OS=Trichoplusia ni OX=7111 GN=LOC113504794 PE=3 SV=1	FALSE	FALSE	TRUE	9.69773	9	9	9	1.42733e+07	11.86
High	A0A7E5WL69	Ubiquilin-1 isoform X1 OS=Trichoplusia ni OX=7111 GN=LOC113503585 PE=4 SV=1	FALSE	FALSE	TRUE	28.7879	10	15	10	1.35422e+07	44.13
High	A0A7E5WIT9	5'-AMP-activated protein kinase catalytic subunit alpha-2 isoform X1 OS=Trichoplusia ni OX=7111 GN=LOC113503039 PE=3 SV=1	FALSE	FALSE	TRUE	24.7563	10	11	10	1.32057e+07	25.49
High	A0A7E5VA16	Eukaryotic translation initiation factor 3 subunit D OS=Trichoplusia ni OX=7111 GN=LOC113492047 PE=3 SV=1	FALSE	FALSE	TRUE	14.1049	6	6	6	1.31112e+07	15.05
High	A0A7E5WWV2	Probable protein phosphatase 2C 11 isoform X1 OS=Trichoplusia ni OX=7111 GN=LOC113505975 PE=3 SV=1	FALSE	FALSE	TRUE	20.8824	10	10	10	1.307e+07	28.2
High	A0A7E5VDK5	LOW QUALITY PROTEIN: importin-5-like OS=Trichoplusia ni OX=7111 GN=LOC113492859 PE=4 SV=1	FALSE	FALSE	TRUE	19.2935	17	19	10	1.28103e+07	48.28
High	A0A7E5VH22	tRNA (guanine(26)-N(2))-dimethyltransferase OS=Trichoplusia ni OX=7111 GN=LOC113493799 PE=3 SV=1	FALSE	FALSE	TRUE	15.7522	8	10	8	1.2598e+07	24.06
High	A0A7E5WUE4	Serine/threonine-protein kinase PAK 2 OS=Trichoplusia ni OX=7111 GN=LOC113505822 PE=4 SV=1	FALSE	FALSE	TRUE	27.3092	11	12	11	1.20397e+07	27.43
High	A0A7E5WDB6	Synapse-associated protein of 47 kDa isoform X3 OS=Trichoplusia ni OX=7111 GN=LOC113501673 PE=4 SV=1	FALSE	FALSE	TRUE	48.9209	16	16	16	1.20038e+07	41.45
High	A0A7E5VVM4	Uncharacterized protein LOC113497167 isoform X2 OS=Trichoplusia ni OX=7111 GN=LOC113497167 PE=4 SV=1	FALSE	FALSE	TRUE	49.2212	9	10	9	1.15831e+07	32.24
High	A0A7E5VN62	Cell growth-regulating nucleolar protein OS=Trichoplusia ni OX=7111 GN=LOC113495297 PE=4 SV=1	FALSE	FALSE	TRUE	29.5508	10	11	10	1.15576e+07	30.63
High	A0A7E5V9S5	Elongation factor 1-alpha OS=Trichoplusia ni OX=7111 GN=LOC113491975 PE=4 SV=1	FALSE	FALSE	TRUE	15.3846	11	12	11	1.13972e+07	24.4
High	A0A7E5WBC8	Very long-chain specific acyl-CoA dehydrogenase, mitochondrial isoform X1 OS=Trichoplusia ni OX=7111 GN=LOC113500974 PE=3 SV=1	FALSE	FALSE	TRUE	21.4173	12	12	12	1.12622e+07	29.06
High	A0A7E5WIY0	Apoptosis-inducing factor 3-like isoform X1 OS=Trichoplusia ni OX=7111 GN=LOC113503050 PE=4 SV=1	FALSE	FALSE	TRUE	19.1803	9	9	9	1.08791e+07	20.54
High	A0A7E5X3L8	Apoptosis inhibitor 5 OS=Trichoplusia ni OX=7111 GN=LOC113508414 PE=3 SV=1	FALSE	FALSE	TRUE	11.5044	7	7	7	1.06525e+07	15.88
High	P08779	Keratin, type I cytoskeletal 16 OS=Homo sapiens GN=KRT16 PE=1 SV=4	TRUE	FALSE	FALSE	20.0846	9	11	1	1.0496e+07	23.57
High	A0A7E5WTY1	Heat shock 70 kDa protein cognate 5 OS=Trichoplusia ni OX=7111 GN=LOC113505692 PE=3 SV=1	FALSE	FALSE	TRUE	28.4257	16	17	16	1.03058e+07	42.34
High	A0A7E5WS01	Protein transport protein SEC23 OS=Trichoplusia ni OX=7111 GN=LOC113504818 PE=3 SV=1	FALSE	FALSE	TRUE	12.5648	8	8	8	1.0274e+07	20.31
High	A0A7E5WSD3	Atlastin-like isoform X2 OS=Trichoplusia ni OX=7111 GN=LOC113504803 PE=3 SV=1	FALSE	FALSE	TRUE	11.8467	6	7	6	1.01817e+07	17.69
High	A0A7E5WD29	Carboxylic ester hydrolase OS=Trichoplusia ni OX=7111 GN=LOC113501653 PE=3 SV=1	FALSE	FALSE	TRUE	14.3369	6	7	6	1.00072e+07	14.49
High	A0A7E5VCH9	Malic enzyme OS=Trichoplusia ni OX=7111 GN=LOC113492630 PE=3 SV=1	FALSE	FALSE	TRUE	18.542	10	11	9	9.92651e+06	25.91
High	A0A7E5WAZ4	Uncharacterized protein LOC113500689 isoform X1 OS=Trichoplusia ni OX=7111 GN=LOC113500689 PE=4 SV=1	FALSE	FALSE	TRUE	16.4076	8	8	8	9.75232e+06	13.04
High	A0A2H4WW89	Tubulin alpha chain OS=Trichoplusia ni OX=7111 GN=LOC113497986 PE=2 SV=1	FALSE	FALSE	TRUE	23.3333	8	10	8	9.67902e+06	25.43
High	A0A7E5VUE3	Splicing factor 3A subunit 3 OS=Trichoplusia ni OX=7111 GN=LOC113496758 PE=3 SV=1	FALSE	FALSE	TRUE	20.7171	8	9	8	9.66398e+06	21.52
High	A0A7E5X012	Polypeptide N-acetylgalactosaminyltransferase OS=Trichoplusia ni OX=7111 GN=LOC113507745 PE=3 SV=1	FALSE	FALSE	TRUE	14.9444	7	7	7	9.65167e+06	14.39
High	A0A7E5WVD3	Hemolin-like OS=Trichoplusia ni OX=7111 GN=LOC113505643 PE=4 SV=1	FALSE	FALSE	TRUE	15.2381	6	6	6	9.60851e+06	13.44
High	A0A7E5VQW4	Calsyntenin-1 OS=Trichoplusia ni OX=7111 GN=LOC113495942 PE=3 SV=1	FALSE	FALSE	TRUE	10.9617	8	10	8	9.5998e+06	27.18
High	A0A7E5WQN0	CWF19-like protein 1 OS=Trichoplusia ni OX=7111 GN=LOC113504400 PE=3 SV=1	FALSE	FALSE	TRUE	13.2959	6	6	6	9.5258e+06	11.13
High	A0A7E5WZZ0	Uncharacterized protein LOC113507720 OS=Trichoplusia ni OX=7111 GN=LOC113507720 PE=4 SV=1	FALSE	FALSE	TRUE	10.4874	5	5	5	9.48236e+06	14.93
High	A0A7E5VVL4	Malic enzyme OS=Trichoplusia ni OX=7111 GN=LOC113496958 PE=3 SV=1	FALSE	FALSE	TRUE	26.0097	13	15	12	9.22018e+06	34.93
High	A0A7E5VGA7	Probable 26S proteasome non-ATPase regulatory subunit 3 OS=Trichoplusia ni OX=7111 GN=LOC113493512 PE=3 SV=1	FALSE	FALSE	TRUE	31.3765	15	15	15	9.15494e+06	32.1
High	A0A7E5WDD4	Dynactin subunit 4 OS=Trichoplusia ni OX=7111 GN=LOC113501285 PE=3 SV=1	FALSE	FALSE	TRUE	20.9016	8	10	8	9.03412e+06	27.41
High	A0A7E5VCZ2	Glutamate--cysteine ligase OS=Trichoplusia ni OX=7111 GN=LOC113492726 PE=3 SV=1	FALSE	FALSE	TRUE	14.2429	9	9	9	8.82291e+06	16.71
High	A0A7E5WRD8	alpha-L-fucosidase OS=Trichoplusia ni OX=7111 GN=LOC113504563 PE=3 SV=1	FALSE	FALSE	TRUE	7.21649	3	3	3	8.6364e+06	8.47
High	A0A7E5WK95	Tyrosine--tRNA ligase OS=Trichoplusia ni OX=7111 GN=LOC113503429 PE=3 SV=1	FALSE	FALSE	TRUE	30.7252	13	14	13	8.36735e+06	34.05
High	A0A7E5WEU6	DnaJ homolog subfamily C member 2 OS=Trichoplusia ni OX=7111 GN=LOC113502036 PE=4 SV=1	FALSE	FALSE	TRUE	18.7399	10	10	10	8.27915e+06	24.47
High	A0A7E5VXW0	Alpha-1,4 glucan phosphorylase OS=Trichoplusia ni OX=7111 GN=LOC113497652 PE=3 SV=1	FALSE	FALSE	TRUE	7.72889	7	7	7	8.25685e+06	14.18
High	A0A7E5VKR1	Vacuolar proton pump subunit B OS=Trichoplusia ni OX=7111 GN=LOC113494681 PE=3 SV=1	FALSE	FALSE	TRUE	26.7606	11	11	11	8.18871e+06	26.42
High	A0A7E5VZ82	Cytosolic purine 5'-nucleotidase isoform X3 OS=Trichoplusia ni OX=7111 GN=LOC113497953 PE=3 SV=1	FALSE	FALSE	TRUE	14.4082	8	8	8	7.85273e+06	14.96
High	A0A7E5VCC2	Fatty-acid amide hydrolase 2-B OS=Trichoplusia ni OX=7111 GN=LOC113492604 PE=4 SV=1	FALSE	FALSE	TRUE	11.3422	5	5	5	7.74996e+06	11.85
High	P02533	Keratin, type I cytoskeletal 14 OS=Homo sapiens GN=KRT14 PE=1 SV=4	TRUE	FALSE	FALSE	31.7797	12	15	4	7.6685e+06	34.55
High	A0A7E5VCU1	RNA helicase OS=Trichoplusia ni OX=7111 GN=LOC113492699 PE=3 SV=1	FALSE	FALSE	TRUE	17.9487	10	12	9	7.63469e+06	35.22
High	A0A7E5WMP7	Eukaryotic translation initiation factor 4B OS=Trichoplusia ni OX=7111 GN=LOC113503740 PE=4 SV=1	FALSE	FALSE	TRUE	3.75427	2	2	2	7.55418e+06	4.97
High	A0A7E5W0P0	Fatty acid synthase isoform X1 OS=Trichoplusia ni OX=7111 GN=LOC113498344 PE=4 SV=1	FALSE	FALSE	TRUE	9.81211	18	19	18	7.53183e+06	49.26
High	P02768	Serum albumin OS=Homo sapiens GN=ALB PE=1 SV=2	TRUE	FALSE	FALSE	22.9885	15	15	13	7.52631e+06	27.38
High	A0A7E5VX81	procollagen-proline 4-dioxygenase OS=Trichoplusia ni OX=7111 GN=LOC113497383 PE=3 SV=1	FALSE	FALSE	TRUE	15.4676	8	9	8	7.36618e+06	21.1
High	A0A451FUM5	Actin OS=Trichoplusia ni OX=7111 GN=LOC113507353 PE=2 SV=1	TRUE	FALSE	TRUE	6.91489	2	3	2	7.31417e+06	6.69
High	A0A7E5X325	RNA-splicing ligase RtcB homolog OS=Trichoplusia ni OX=7111 GN=LOC113508025 PE=3 SV=1	FALSE	FALSE	TRUE	5.92885	2	2	2	7.30642e+06	7.05
High	A0A7E5V8A8	Ran GTPase-activating protein 1 isoform X1 OS=Trichoplusia ni OX=7111 GN=LOC113491648 PE=4 SV=1	FALSE	FALSE	TRUE	9.66667	5	5	5	7.26064e+06	12.47
High	A0A7E5VK44	Tubulin beta chain OS=Trichoplusia ni OX=7111 GN=LOC113494443 PE=3 SV=1	FALSE	FALSE	TRUE	16.2946	6	7	6	7.24364e+06	14.74
High	P13647	Keratin, type II cytoskeletal 5 OS=Homo sapiens GN=KRT5 PE=1 SV=3	TRUE	FALSE	FALSE	20.339	15	15	7	7.23578e+06	24.98
High	A0A7E5VKQ0	Amidophosphoribosyltransferase OS=Trichoplusia ni OX=7111 GN=LOC113494579 PE=3 SV=1	FALSE	FALSE	TRUE	20.8113	9	10	9	7.16341e+06	24.01
High	A0A7E5WK01	Eukaryotic translation initiation factor 3 subunit C OS=Trichoplusia ni OX=7111 GN=LOC113503061 PE=3 SV=1	FALSE	FALSE	TRUE	14.3665	12	13	12	7.10099e+06	28.75
High	A0A7E5WA77	Formin-like protein 14 OS=Trichoplusia ni OX=7111 GN=LOC113500858 PE=4 SV=1	FALSE	FALSE	TRUE	10.9145	3	3	3	7.0516e+06	8.02
High	A0A7E5VAW7	Fascin OS=Trichoplusia ni OX=7111 GN=LOC113492240 PE=3 SV=1	FALSE	FALSE	TRUE	12.7202	6	6	6	7.04116e+06	13.8
High	A0A7E5VG73	enoyl-CoA hydratase OS=Trichoplusia ni OX=7111 GN=LOC113493488 PE=3 SV=1	FALSE	FALSE	TRUE	17.7398	11	12	11	7.00465e+06	29.97
High	A0A7E5WHV4	Vesicle-fusing ATPase OS=Trichoplusia ni OX=7111 GN=LOC113502529 PE=3 SV=1	FALSE	FALSE	TRUE	16.756	10	10	10	7.00349e+06	19.04
High	A0A7E5VLT3	Coiled-coil domain-containing protein 6 isoform X1 OS=Trichoplusia ni OX=7111 GN=LOC113494929 PE=4 SV=1	FALSE	FALSE	TRUE	31.3253	11	11	11	6.94091e+06	27.73
High	A0A7E5VMD0	SH3 domain-binding glutamic acid-rich protein homolog OS=Trichoplusia ni OX=7111 GN=LOC113495051 PE=3 SV=1	FALSE	FALSE	TRUE	36.5942	9	10	9	6.87474e+06	26.09
High	A0A7E5VBV1	alpha-glucosidase OS=Trichoplusia ni OX=7111 GN=LOC113492491 PE=4 SV=1	FALSE	FALSE	TRUE	7.84314	4	4	4	6.84743e+06	9.26
High	A0A7E5X451	glutamine--tRNA ligase OS=Trichoplusia ni OX=7111 GN=LOC113508384 PE=3 SV=1	FALSE	FALSE	TRUE	14.8718	11	12	11	6.80447e+06	23.29
High	A0A7E5VL02	Aconitate hydratase, mitochondrial OS=Trichoplusia ni OX=7111 GN=LOC113494725 PE=3 SV=1	FALSE	FALSE	TRUE	9.77157	6	6	6	6.74052e+06	16.26
High	A0A7E5VG71	Lysine--tRNA ligase OS=Trichoplusia ni OX=7111 GN=LOC113493447 PE=3 SV=1	FALSE	FALSE	TRUE	10.6845	6	6	6	6.64394e+06	11.4
High	A0A7E5WLC7	Vanin-like protein 2 isoform X2 OS=Trichoplusia ni OX=7111 GN=LOC113503225 PE=3 SV=1	FALSE	FALSE	TRUE	25.3333	10	11	2	6.59251e+06	28.32
High	A0A7E5VT48	Uncharacterized protein LOC113496472 OS=Trichoplusia ni OX=7111 GN=LOC113496472 PE=4 SV=1	FALSE	FALSE	TRUE	11.6327	5	5	5	6.5642e+06	12.37
High	A0A7E5VQ53	procollagen-lysine 5-dioxygenase OS=Trichoplusia ni OX=7111 GN=LOC113495745 PE=4 SV=1	FALSE	FALSE	TRUE	13.9257	8	8	8	6.51665e+06	18.97
High	A0A7E5WQQ8	FACT complex subunit OS=Trichoplusia ni OX=7111 GN=LOC113504542 PE=3 SV=1	FALSE	FALSE	TRUE	3.43008	4	4	4	6.43477e+06	9.23
High	A0A7E5VSE5	ATP-dependent 6-phosphofructokinase OS=Trichoplusia ni OX=7111 GN=LOC113496310 PE=3 SV=1	FALSE	FALSE	TRUE	5.37084	4	4	4	6.42789e+06	9.94
High	A0A7E5VN28	Uncharacterized protein LOC113495271 OS=Trichoplusia ni OX=7111 GN=LOC113495271 PE=3 SV=1	FALSE	FALSE	TRUE	16.7339	8	9	8	6.40285e+06	18.54
High	A0A7E5WB24	Importin subunit alpha OS=Trichoplusia ni OX=7111 GN=LOC113500906 PE=3 SV=1	FALSE	FALSE	TRUE	18.2342	7	7	7	6.34782e+06	18.54
High	A0A7E5WP71	Pre-mRNA-processing factor 19 OS=Trichoplusia ni OX=7111 GN=LOC113504409 PE=3 SV=1	FALSE	FALSE	TRUE	13.6273	6	6	6	6.31044e+06	13.63
High	A0A7E5WIA4	calcium/calmodulin-dependent protein kinase OS=Trichoplusia ni OX=7111 GN=LOC113502491 PE=3 SV=1	FALSE	FALSE	TRUE	13.9216	6	6	6	6.30782e+06	11.78
High	A0A7E5WKF1	Nardilysin-like isoform X1 OS=Trichoplusia ni OX=7111 GN=LOC113503180 PE=3 SV=1	FALSE	FALSE	TRUE	13.073	14	14	14	6.2952e+06	32.73
High	A0A7E5WC14	TOM1-like protein 2 isoform X1 OS=Trichoplusia ni OX=7111 GN=LOC113501331 PE=3 SV=1	FALSE	FALSE	TRUE	18.146	6	6	6	6.20452e+06	16.03
High	A0A7E5VM76	RNA helicase OS=Trichoplusia ni OX=7111 GN=LOC113495046 PE=3 SV=1	FALSE	FALSE	TRUE	16.2521	11	11	11	6.09621e+06	24.06
High	A0A7E5WFK9	Perilipin-4-like isoform X1 OS=Trichoplusia ni OX=7111 GN=LOC113502218 PE=4 SV=1	FALSE	FALSE	TRUE	28.5202	22	22	22	6.09059e+06	68.38
High	A0A7E5WG84	Tripeptidyl-peptidase 2 OS=Trichoplusia ni OX=7111 GN=LOC113501996 PE=3 SV=1	FALSE	FALSE	TRUE	7.7961	7	7	7	6.08571e+06	18.88
High	A0A7E5VRX4	Mucin-5AC-like isoform X1 OS=Trichoplusia ni OX=7111 GN=LOC113496176 PE=4 SV=1	FALSE	FALSE	TRUE	9.23913	6	6	6	6.04346e+06	16.91
High	A0A7E5WQX7	Leukotriene A-4 hydrolase isoform X1 OS=Trichoplusia ni OX=7111 GN=LOC113504874 PE=3 SV=1	FALSE	FALSE	TRUE	12.3664	9	9	9	5.99876e+06	17.55
High	A0A7E5X365	Plasminogen activator inhibitor 1 RNA-binding protein-like OS=Trichoplusia ni OX=7111 GN=LOC113508773 PE=4 SV=1	FALSE	FALSE	TRUE	10.1036	4	5	4	5.91088e+06	10.84
High	A0A7E5WLE5	Fatty-acid amide hydrolase 2 isoform X1 OS=Trichoplusia ni OX=7111 GN=LOC113503701 PE=4 SV=1	FALSE	FALSE	TRUE	18.8645	9	9	9	5.897e+06	18
High	A0A7E5VNS0	Coatomer subunit alpha OS=Trichoplusia ni OX=7111 GN=LOC113495443 PE=4 SV=1	FALSE	FALSE	TRUE	6.24493	7	7	7	5.85391e+06	16.09
High	A0A7E5VVS0	Mitochondrial import receptor subunit TOM70 OS=Trichoplusia ni OX=7111 GN=LOC113497203 PE=4 SV=1	FALSE	FALSE	TRUE	21.0238	11	11	11	5.81618e+06	16.09
High	A0A7E5VEH7	Succinate dehydrogenase [ubiquinone] flavoprotein subunit, mitochondrial OS=Trichoplusia ni OX=7111 GN=LOC113493067 PE=3 SV=1	FALSE	FALSE	TRUE	16.6159	8	8	8	5.80406e+06	22.69
High	A0A7E5VWB2	Nidogen-1 isoform X1 OS=Trichoplusia ni OX=7111 GN=LOC113497286 PE=4 SV=1	FALSE	FALSE	TRUE	7.80669	10	10	10	5.79025e+06	20.98
High	A0A7E5VHL9	Nucleobindin-2 isoform X1 OS=Trichoplusia ni OX=7111 GN=LOC113493950 PE=3 SV=1	FALSE	FALSE	TRUE	14.6465	8	8	8	5.76725e+06	19.65
High	P00698	Lysozyme C OS=Gallus gallus GN=LYZ PE=1 SV=1	TRUE	FALSE	FALSE	23.8095	3	3	3	5.71843e+06	8.78
High	A0A7E5VDH7	Myotubularin-related protein 9 OS=Trichoplusia ni OX=7111 GN=LOC113492826 PE=3 SV=1	FALSE	FALSE	TRUE	14.7748	8	8	8	5.64257e+06	15.3
High	A0A7E5W0T6	Juvenile hormone esterase-like isoform X1 OS=Trichoplusia ni OX=7111 GN=LOC113498447 PE=3 SV=1	FALSE	FALSE	TRUE	10.957	7	7	7	5.57536e+06	11.95
High	A0A7E5VGD0	Geranylgeranyl transferase type-2 subunit alpha OS=Trichoplusia ni OX=7111 GN=LOC113493518 PE=3 SV=1	FALSE	FALSE	TRUE	6.25	4	4	4	5.47873e+06	6.27
High	A0A7E5VPR5	Eukaryotic translation initiation factor 4 gamma 3 isoform X1 OS=Trichoplusia ni OX=7111 GN=LOC113495640 PE=3 SV=1	FALSE	FALSE	TRUE	9.72527	13	13	13	5.44371e+06	28.52
High	A0A7E5WD26	Collagen alpha-1(IV) chain OS=Trichoplusia ni OX=7111 GN=LOC113501211 PE=4 SV=1	FALSE	FALSE	TRUE	10.2835	11	11	11	5.408e+06	31.46
High	A0A7E5W7H7	Hemicentin-1-like OS=Trichoplusia ni OX=7111 GN=LOC113500009 PE=4 SV=1	FALSE	FALSE	TRUE	8.50923	11	11	11	5.31772e+06	20.98
High	A0A7E5WYZ7	Zinc finger protein ZPR1-like OS=Trichoplusia ni OX=7111 GN=LOC113507437 PE=3 SV=1	FALSE	FALSE	TRUE	4.47761	2	2	2	5.16227e+06	4.86
High	A0A7E5W2Z9	DNA polymerase alpha subunit B OS=Trichoplusia ni OX=7111 GN=LOC113498921 PE=3 SV=1	FALSE	FALSE	TRUE	16.295	7	7	7	5.14618e+06	13.14
High	A0A7E5VFQ6	Programmed cell death 6-interacting protein OS=Trichoplusia ni OX=7111 GN=LOC113493341 PE=4 SV=1	FALSE	FALSE	TRUE	9.76471	7	8	7	5.08022e+06	21.32
High	A0A7E5VVH3	Carboxylic ester hydrolase OS=Trichoplusia ni OX=7111 GN=LOC113497045 PE=3 SV=1	FALSE	FALSE	TRUE	9.4162	5	5	5	5.07732e+06	11.66
High	A0A7E5WGS5	threonine--tRNA ligase OS=Trichoplusia ni OX=7111 GN=LOC113502506 PE=3 SV=1	FALSE	FALSE	TRUE	9.45205	6	6	6	4.99085e+06	12.97
High	A0A7E5WAU2	DnaJ homolog subfamily C member 7 OS=Trichoplusia ni OX=7111 GN=LOC113501014 PE=4 SV=1	FALSE	FALSE	TRUE	15.587	6	6	6	4.97135e+06	14.29
High	A0A7E5VUB5	Heterogeneous nuclear ribonucleoprotein R OS=Trichoplusia ni OX=7111 GN=LOC113496737 PE=4 SV=1	FALSE	FALSE	TRUE	12.2417	6	6	6	4.87225e+06	14.42
High	A0A7E5VGY4	Sorting nexin-27 isoform X3 OS=Trichoplusia ni OX=7111 GN=LOC113493767 PE=4 SV=1	FALSE	FALSE	TRUE	16.888	9	9	9	4.81879e+06	12.33
High	A0A7E5VYH6	Uncharacterized protein LOC113497828 OS=Trichoplusia ni OX=7111 GN=LOC113497828 PE=4 SV=1	FALSE	FALSE	TRUE	7.85714	7	7	7	4.80866e+06	16.66
High	A0A7E5WGC3	Bifunctional 3'-phosphoadenosine 5'-phosphosulfate synthase isoform X1 OS=Trichoplusia ni OX=7111 GN=LOC113502400 PE=3 SV=1	FALSE	FALSE	TRUE	9.21875	5	5	5	4.78461e+06	9.56
High	A0A7E5WWH1	Leucine-rich repeat protein soc-2 homolog OS=Trichoplusia ni OX=7111 GN=LOC113505955 PE=4 SV=1	FALSE	FALSE	TRUE	8.46561	4	4	4	4.77667e+06	8.64
High	A0A7E5X133	N-sulphoglucosamine sulphohydrolase isoform X1 OS=Trichoplusia ni OX=7111 GN=LOC113508096 PE=3 SV=1	FALSE	FALSE	TRUE	5.20231	3	3	3	4.73594e+06	6.03
High	A0A7E5WSG9	Ribosome-binding protein 1-like isoform X1 OS=Trichoplusia ni OX=7111 GN=LOC113504836 PE=4 SV=1	FALSE	FALSE	TRUE	15.8898	11	12	11	4.73478e+06	32.43
High	A0A7E5WB93	Contactin OS=Trichoplusia ni OX=7111 GN=LOC113500766 PE=4 SV=1	FALSE	FALSE	TRUE	7.46951	8	9	8	4.66057e+06	19.86
High	Q8T4N1	Beta-hexosaminidase OS=Trichoplusia ni OX=7111 GN=LOC113497289 PE=2 SV=1	FALSE	FALSE	TRUE	13.2773	7	8	7	4.45885e+06	16
High	A0A7E5W4L0	GMP synthase (glutamine-hydrolyzing) OS=Trichoplusia ni OX=7111 GN=LOC113499351 PE=4 SV=1	FALSE	FALSE	TRUE	14.0625	8	8	8	4.43477e+06	19.58
High	A0A7E5WBW0	Bifunctional purine biosynthesis protein ATIC OS=Trichoplusia ni OX=7111 GN=LOC113500912 PE=3 SV=1	FALSE	FALSE	TRUE	13.2997	7	7	7	4.40361e+06	14.11
High	A0A7E5VMK3	Dipeptidyl peptidase 3 OS=Trichoplusia ni OX=7111 GN=LOC113495042 PE=3 SV=1	FALSE	FALSE	TRUE	11.5435	8	8	8	4.39696e+06	17.49
High	A0A7E5W287	Staphylococcal nuclease domain-containing protein OS=Trichoplusia ni OX=7111 GN=LOC113498757 PE=4 SV=1	FALSE	FALSE	TRUE	10.838	9	9	9	4.39072e+06	16.76
High	A0A7E5VYF5	Hrp65 protein-like OS=Trichoplusia ni OX=7111 GN=LOC113497793 PE=4 SV=1	FALSE	FALSE	TRUE	22.1374	12	12	12	4.32854e+06	26.88
High	A0A7E5X0Q0	Protein sidekick OS=Trichoplusia ni OX=7111 GN=LOC113508005 PE=4 SV=1	FALSE	FALSE	TRUE	4.60037	7	7	7	4.27359e+06	21.12
High	A0A7E5VU29	Fragile X mental retardation syndrome-related protein 1 OS=Trichoplusia ni OX=7111 GN=LOC113496729 PE=4 SV=1	FALSE	FALSE	TRUE	8.77483	5	5	5	4.26618e+06	11.53
High	A0A7E5X3R8	Laminin subunit beta-1 OS=Trichoplusia ni OX=7111 GN=LOC113508286 PE=4 SV=1	FALSE	FALSE	TRUE	6.23245	9	9	9	4.26408e+06	15.85
High	A0A7E5WTZ2	ATP-citrate synthase OS=Trichoplusia ni OX=7111 GN=LOC113505697 PE=3 SV=1	FALSE	FALSE	TRUE	11.8675	11	11	11	4.23386e+06	19.63
High	A0A7E5VWI4	Piwi-like protein Siwi OS=Trichoplusia ni OX=7111 GN=LOC113497222 PE=3 SV=1	FALSE	FALSE	TRUE	16.3898	12	12	12	4.20141e+06	29.97
High	A0A7E5VPP5	non-specific serine/threonine protein kinase OS=Trichoplusia ni OX=7111 GN=LOC113495656 PE=3 SV=1	FALSE	FALSE	TRUE	17.6829	8	8	8	4.12971e+06	16.47
High	A0A7E5VTJ4	poly(A)-specific ribonuclease OS=Trichoplusia ni OX=7111 GN=LOC113496590 PE=3 SV=1	FALSE	FALSE	TRUE	6.45756	3	3	3	4.10606e+06	6.98
High	A0A7E5WPT6	Matrix metalloproteinase-2-like isoform X1 OS=Trichoplusia ni OX=7111 GN=LOC113504570 PE=3 SV=1	FALSE	FALSE	TRUE	7.26916	3	3	3	4.09008e+06	7.61
High	A0A7E5X1B5	CTP synthase OS=Trichoplusia ni OX=7111 GN=LOC113507725 PE=3 SV=1	FALSE	FALSE	TRUE	7.46269	4	4	4	4.08934e+06	9.76
High	A0A7E5VMA4	Ran-binding protein 3 OS=Trichoplusia ni OX=7111 GN=LOC113495064 PE=4 SV=1	FALSE	FALSE	TRUE	14.5969	5	5	5	4.06006e+06	14.25
High	A0A7E5X0F6	Venom dipeptidyl peptidase 4-like isoform X1 OS=Trichoplusia ni OX=7111 GN=LOC113507516 PE=4 SV=1	FALSE	FALSE	TRUE	6.90909	4	4	4	4.04274e+06	11.41
High	A0A7E5VQC0	Failed axon connections OS=Trichoplusia ni OX=7111 GN=LOC113495770 PE=3 SV=1	FALSE	FALSE	TRUE	24.3386	7	7	7	4.03088e+06	19.32
High	A0A7E5VY37	SUMO-activating enzyme subunit OS=Trichoplusia ni OX=7111 GN=LOC113497701 PE=3 SV=1	FALSE	FALSE	TRUE	9.75207	5	5	5	3.9989e+06	12.85
High	A0A7E5WEQ8	E1 ubiquitin-activating enzyme OS=Trichoplusia ni OX=7111 GN=LOC113501820 PE=3 SV=1	FALSE	FALSE	TRUE	12.2021	11	13	11	3.99885e+06	28.58
High	A0A7E5VE87	Importin subunit alpha OS=Trichoplusia ni OX=7111 GN=LOC113493033 PE=3 SV=1	FALSE	FALSE	TRUE	15.9223	7	7	7	3.98567e+06	12.07
High	A0A7E5VBH2	Dihydrolipoyllysine-residue succinyltransferase component of 2-oxoglutarate dehydrogenase complex, mitochondrial OS=Trichoplusia ni OX=7111 GN=LOC113492358 PE=3 SV=1	FALSE	FALSE	TRUE	7.85563	3	3	3	3.97171e+06	8.11
High	A0A7E5WCZ5	SRSF protein kinase 3 OS=Trichoplusia ni OX=7111 GN=LOC113501182 PE=4 SV=1	FALSE	FALSE	TRUE	9.09091	5	5	5	3.9581e+06	11.36
High	A0A7E5VQ45	Ferric-chelate reductase 1 homolog OS=Trichoplusia ni OX=7111 GN=LOC113495714 PE=3 SV=1	FALSE	FALSE	TRUE	3.28125	2	2	2	3.94668e+06	3.73
High	A0A7E5WR31	Kinesin-like protein OS=Trichoplusia ni OX=7111 GN=LOC113504608 PE=3 SV=1	FALSE	FALSE	TRUE	11.4907	10	10	10	3.93023e+06	25.21
High	A0A7E5VXH4	Drebrin-like protein OS=Trichoplusia ni OX=7111 GN=LOC113497588 PE=3 SV=1	FALSE	FALSE	TRUE	7.73286	4	4	4	3.87396e+06	8.11
High	A0A7E5WPX5	Thioredoxin reductase 1, mitochondrial isoform X1 OS=Trichoplusia ni OX=7111 GN=LOC113504568 PE=3 SV=1	FALSE	FALSE	TRUE	9.02256	4	4	4	3.86687e+06	8.03
High	A0A7E5W7J7	ATP-binding cassette sub-family F member 2 OS=Trichoplusia ni OX=7111 GN=LOC113499837 PE=4 SV=1	FALSE	FALSE	TRUE	13.2045	7	7	7	3.83716e+06	15.55
High	A0A7E5WWA9	Heat shock protein 83 OS=Trichoplusia ni OX=7111 GN=LOC113506484 PE=3 SV=1	FALSE	FALSE	TRUE	14.8718	10	10	9	3.78679e+06	19.98
High	A0A7E5VJJ6	Phosphatidylinositide phosphatase SAC1-like OS=Trichoplusia ni OX=7111 GN=LOC113494355 PE=4 SV=1	FALSE	FALSE	TRUE	14.0234	7	7	7	3.78605e+06	17.38
High	A0A7E5VAA9	Lethal(2) giant larvae protein isoform X1 OS=Trichoplusia ni OX=7111 GN=LOC113492109 PE=3 SV=1	FALSE	FALSE	TRUE	5.02693	5	5	5	3.7801e+06	12.78
High	A0A7E5WM47	Kinesin light chain OS=Trichoplusia ni OX=7111 GN=LOC113503845 PE=3 SV=1	FALSE	FALSE	TRUE	43.0451	19	24	2	3.77447e+06	64.62
High	A0A7E5WAB7	Exosome complex exonuclease RRP44 OS=Trichoplusia ni OX=7111 GN=LOC113500872 PE=3 SV=1	FALSE	FALSE	TRUE	8.06946	6	6	6	3.77426e+06	10.75
High	A0A7E5W9V0	alpha-1,2-Mannosidase OS=Trichoplusia ni OX=7111 GN=LOC113500731 PE=3 SV=1	FALSE	FALSE	TRUE	6.58683	4	4	4	3.70945e+06	10.66
High	A0A7E5W0U1	Bifunctional glutamate/proline--tRNA ligase isoform X1 OS=Trichoplusia ni OX=7111 GN=LOC113498448 PE=3 SV=1	FALSE	FALSE	TRUE	8.84593	13	13	13	3.70647e+06	29.82
High	A0A7E5W8B3	ADP-ribosylation factor GTPase-activating protein 3 OS=Trichoplusia ni OX=7111 GN=LOC113500324 PE=4 SV=1	FALSE	FALSE	TRUE	18.9024	8	9	8	3.68491e+06	21.52
High	A0A7E5W6Z5	Laminin subunit gamma-1 OS=Trichoplusia ni OX=7111 GN=LOC113499965 PE=4 SV=1	FALSE	FALSE	TRUE	6.96822	10	10	10	3.66224e+06	25.97
High	A0A7E5W511	Serine/arginine-rich splicing factor 5 isoform X1 OS=Trichoplusia ni OX=7111 GN=LOC113499340 PE=4 SV=1	FALSE	FALSE	TRUE	8.29016	3	3	3	3.65192e+06	6.07
High	A0A7E5WDM5	Uncharacterized protein LOC113501747 OS=Trichoplusia ni OX=7111 GN=LOC113501747 PE=3 SV=1	FALSE	FALSE	TRUE	14.1538	9	9	9	3.6436e+06	21.86
High	A0A7E5WYP5	60S ribosomal protein L3 OS=Trichoplusia ni OX=7111 GN=LOC113506956 PE=3 SV=1	FALSE	FALSE	TRUE	7.24638	2	2	2	3.61342e+06	6.84
High	A0A7E5X5U8	60S ribosomal protein L4 OS=Trichoplusia ni OX=7111 GN=LOC113508986 PE=3 SV=1	FALSE	FALSE	TRUE	16.3218	6	7	6	3.58222e+06	16.92
High	A0A7E5WIC2	glutamate synthase (NADH) OS=Trichoplusia ni OX=7111 GN=LOC113502498 PE=3 SV=1	FALSE	FALSE	TRUE	5.95412	10	10	10	3.56394e+06	21.53
High	A0A7E5VZE7	Maternal protein tudor-like isoform X1 OS=Trichoplusia ni OX=7111 GN=LOC113498000 PE=4 SV=1	FALSE	FALSE	TRUE	3.34308	6	6	6	3.52926e+06	14.95
High	A0A7E5V9X9	Ubiquitin carboxyl-terminal hydrolase 7 OS=Trichoplusia ni OX=7111 GN=LOC113492018 PE=3 SV=1	FALSE	FALSE	TRUE	5.61497	6	6	6	3.51703e+06	12.95
High	A0A7E5WEK1	tRNA (uracil(54)-C(5))-methyltransferase OS=Trichoplusia ni OX=7111 GN=LOC113501986 PE=3 SV=1	FALSE	FALSE	TRUE	10.5611	6	6	6	3.44337e+06	7.91
High	A0A7E5VKI3	Glycine--tRNA ligase OS=Trichoplusia ni OX=7111 GN=LOC113494610 PE=3 SV=1	FALSE	FALSE	TRUE	12.0219	8	8	7	3.42471e+06	18.94
High	A0A7E5VZ16	WD repeat-containing protein 26 OS=Trichoplusia ni OX=7111 GN=LOC113497806 PE=4 SV=1	FALSE	FALSE	TRUE	10.6691	5	5	5	3.33035e+06	11.88
High	A0A7E5VAS2	Myosin heavy chain, non-muscle isoform X1 OS=Trichoplusia ni OX=7111 GN=LOC113492215 PE=3 SV=1	FALSE	FALSE	TRUE	6.29442	10	10	10	3.29272e+06	23.47
High	A0A7E5WT37	Regulator of chromosome condensation-like OS=Trichoplusia ni OX=7111 GN=LOC113505125 PE=4 SV=1	FALSE	FALSE	TRUE	8.33333	3	3	3	3.22303e+06	7.21
High	A0A7E5X4C8	Dynamin-1-like protein isoform X1 OS=Trichoplusia ni OX=7111 GN=LOC113508433 PE=4 SV=1	FALSE	FALSE	TRUE	12.2476	9	9	9	3.19877e+06	16.09
High	A0A7E5WAX2	Uncharacterized protein C05D11.1-like OS=Trichoplusia ni OX=7111 GN=LOC113501061 PE=4 SV=1	FALSE	FALSE	TRUE	6.2749	6	6	6	3.1916e+06	9.82
High	A0A7E5VDH5	polo kinase OS=Trichoplusia ni OX=7111 GN=LOC113492842 PE=4 SV=1	FALSE	FALSE	TRUE	7.16783	4	5	4	3.13119e+06	6.12
High	A0A7E5WP50	Ribosomal protein S6 kinase OS=Trichoplusia ni OX=7111 GN=LOC113504422 PE=3 SV=1	FALSE	FALSE	TRUE	7.30088	3	3	3	3.1302e+06	7.03
High	A0A7E5W471	Src substrate cortactin isoform X1 OS=Trichoplusia ni OX=7111 GN=LOC113499222 PE=4 SV=1	FALSE	FALSE	TRUE	9.63391	5	5	5	3.12826e+06	6.17
High	A0A7E5WBL6	Collagen alpha-1(IV) chain OS=Trichoplusia ni OX=7111 GN=LOC113501210 PE=4 SV=1	FALSE	FALSE	TRUE	11.2384	14	14	14	3.1082e+06	32.6
High	A0A7E5WNU0	Serine/threonine-protein kinase tricorner isoform X1 OS=Trichoplusia ni OX=7111 GN=LOC113504344 PE=3 SV=1	FALSE	FALSE	TRUE	8.97436	3	3	3	3.09232e+06	7.76
High	A0A7E5VYM8	Vinculin OS=Trichoplusia ni OX=7111 GN=LOC113497872 PE=3 SV=1	FALSE	FALSE	TRUE	4.96381	4	4	4	3.05512e+06	9.37
High	A0A7E5WW35	RNA-binding protein cabeza isoform X1 OS=Trichoplusia ni OX=7111 GN=LOC113506083 PE=3 SV=1	FALSE	FALSE	TRUE	5.15695	2	2	2	2.9951e+06	4.37
High	A0A7E5WF40	Deoxyribodipyrimidine photo-lyase OS=Trichoplusia ni OX=7111 GN=LOC113502134 PE=3 SV=1	FALSE	FALSE	TRUE	4.78011	3	3	3	2.96598e+06	4.14
High	A0A7E5WD56	Integrin beta pat-3-like OS=Trichoplusia ni OX=7111 GN=LOC113501578 PE=3 SV=1	FALSE	FALSE	TRUE	7.79817	2	2	2	2.95815e+06	5.67
High	A0A7E5WC18	LOW QUALITY PROTEIN: methyltransferase-like protein 13 OS=Trichoplusia ni OX=7111 GN=LOC113501336 PE=4 SV=1	FALSE	FALSE	TRUE	7.13202	4	4	2	2.90845e+06	7.26
High	A0A7E5WGA3	Pre-rRNA-processing protein TSR1 homolog OS=Trichoplusia ni OX=7111 GN=LOC113502382 PE=4 SV=1	FALSE	FALSE	TRUE	7.11563	5	5	5	2.9018e+06	8.16
High	A0A7E5WKN8	isoleucine--tRNA ligase OS=Trichoplusia ni OX=7111 GN=LOC113503469 PE=3 SV=1	FALSE	FALSE	TRUE	1.81369	2	2	2	2.89605e+06	2.3
High	A0A7E5VB32	UDP-N-acetylhexosamine pyrophosphorylase-like protein 1 OS=Trichoplusia ni OX=7111 GN=LOC113492262 PE=4 SV=1	FALSE	FALSE	TRUE	4.26621	2	2	2	2.83892e+06	5.35
High	A0A7E5WHI3	Heat shock protein 70 A1-like OS=Trichoplusia ni OX=7111 GN=LOC113502297 PE=3 SV=1	FALSE	FALSE	TRUE	12.5397	7	11	2	2.80402e+06	30.75
High	A0A7E5VFX5	Xylulose kinase OS=Trichoplusia ni OX=7111 GN=LOC113493419 PE=3 SV=1	FALSE	FALSE	TRUE	6.42722	3	3	3	2.76782e+06	6.83
High	A0A7E5WR56	ATP-binding cassette sub-family F member 3 OS=Trichoplusia ni OX=7111 GN=LOC113504503 PE=4 SV=1	FALSE	FALSE	TRUE	12.0567	6	6	6	2.75234e+06	13.18
High	A0A7E5WEZ2	Ubiquitin carboxyl-terminal hydrolase OS=Trichoplusia ni OX=7111 GN=LOC113501723 PE=3 SV=1	FALSE	FALSE	TRUE	10.6568	6	7	6	2.72772e+06	17.76
High	A0A7E5WDQ2	Alanine--tRNA ligase OS=Trichoplusia ni OX=7111 GN=LOC113501557 PE=3 SV=1	FALSE	FALSE	TRUE	6.41822	5	5	5	2.72557e+06	8.61
High	A0A7E5VZE9	RNA helicase OS=Trichoplusia ni OX=7111 GN=LOC113498032 PE=3 SV=1	FALSE	FALSE	TRUE	13.4307	9	11	4	2.71039e+06	21.96
High	A0A7E5WRW4	Protein FAM98A OS=Trichoplusia ni OX=7111 GN=LOC113505056 PE=3 SV=1	FALSE	FALSE	TRUE	7.40038	4	4	4	2.69926e+06	6.35
High	A0A7E5X4W5	Nuclear receptor-binding protein homolog OS=Trichoplusia ni OX=7111 GN=LOC113508812 PE=4 SV=1	FALSE	FALSE	TRUE	5.36779	3	3	3	2.65926e+06	5.98
High	A0A7E5X3R9	Coiled-coil domain-containing protein 22 homolog OS=Trichoplusia ni OX=7111 GN=LOC113508314 PE=3 SV=1	FALSE	FALSE	TRUE	12.1514	5	5	5	2.65205e+06	11.09
High	A0A7E5WZM0	ATP synthase subunit alpha OS=Trichoplusia ni OX=7111 GN=LOC113507229 PE=3 SV=1	FALSE	FALSE	TRUE	9.69479	5	5	5	2.59722e+06	11.26
High	A0A7E5WY07	26S proteasome regulatory subunit 4 OS=Trichoplusia ni OX=7111 GN=LOC113506737 PE=3 SV=1	FALSE	FALSE	TRUE	5.46697	2	2	2	2.58057e+06	5.29
High	A0A7E5W1Q7	Replication protein A subunit OS=Trichoplusia ni OX=7111 GN=LOC113498438 PE=3 SV=1	FALSE	FALSE	TRUE	10.1161	5	6	5	2.57859e+06	13.08
High	A0A7E5WC40	Lariat debranching enzyme isoform X1 OS=Trichoplusia ni OX=7111 GN=LOC113501358 PE=3 SV=1	FALSE	FALSE	TRUE	17.9641	7	8	7	2.51713e+06	10.74
High	A0A7E5VL35	BAG domain-containing protein Samui isoform X1 OS=Trichoplusia ni OX=7111 GN=LOC113494748 PE=4 SV=1	FALSE	FALSE	TRUE	8.92587	4	4	4	2.51173e+06	9.46
High	A0A7E5WIT1	CCR4-NOT transcription complex subunit 10 OS=Trichoplusia ni OX=7111 GN=LOC113503030 PE=3 SV=1	FALSE	FALSE	TRUE	3.71681	2	2	2	2.49722e+06	5
High	A0A7E5VNC8	Pseudouridylate synthase 7 homolog OS=Trichoplusia ni OX=7111 GN=LOC113495350 PE=3 SV=1	FALSE	FALSE	TRUE	8.16864	5	5	5	2.48246e+06	9.77
High	A0A7E5WMP6	Aldehyde dehydrogenase, mitochondrial OS=Trichoplusia ni OX=7111 GN=LOC113503573 PE=3 SV=1	FALSE	FALSE	TRUE	16.3065	6	6	6	2.4623e+06	13.88
High	A0A7E5VT68	Septin-7 isoform X1 OS=Trichoplusia ni OX=7111 GN=LOC113496464 PE=3 SV=1	FALSE	FALSE	TRUE	10.1156	6	6	6	2.44899e+06	12
High	A0A7E5WJI2	Uncharacterized protein LOC113502794 OS=Trichoplusia ni OX=7111 GN=LOC113502794 PE=4 SV=1	FALSE	FALSE	TRUE	14.1818	3	3	3	2.43698e+06	5.19
High	A0A7E5X247	Caprin homolog OS=Trichoplusia ni OX=7111 GN=LOC113508429 PE=3 SV=1	FALSE	FALSE	TRUE	9.95025	5	5	5	2.42606e+06	9.53
High	A0A7E5W4C9	26S proteasome non-ATPase regulatory subunit 2 OS=Trichoplusia ni OX=7111 GN=LOC113499000 PE=3 SV=1	FALSE	FALSE	TRUE	7.21983	6	6	6	2.37118e+06	12.74
High	A0A7E5VK76	U4/U6.U5 tri-snRNP-associated protein 2 OS=Trichoplusia ni OX=7111 GN=LOC113494520 PE=4 SV=1	FALSE	FALSE	TRUE	10.7216	5	5	5	2.35858e+06	9.06
High	A0A7E5WAL1	Serine/threonine-protein kinase 4 isoform X1 OS=Trichoplusia ni OX=7111 GN=LOC113500953 PE=4 SV=1	FALSE	FALSE	TRUE	9.39716	4	4	4	2.35066e+06	11.56
High	A0A7E5WHE2	phosphoribosylformylglycinamidine synthase OS=Trichoplusia ni OX=7111 GN=LOC113502690 PE=3 SV=1	FALSE	FALSE	TRUE	6.94645	7	8	7	2.3348e+06	16.57
High	A0A7E5WMB2	Plexin domain-containing protein 2 OS=Trichoplusia ni OX=7111 GN=LOC113503654 PE=4 SV=1	FALSE	FALSE	TRUE	5.06329	2	2	2	2.32804e+06	2.41
High	A0A7E5WFC8	Kinesin-like protein OS=Trichoplusia ni OX=7111 GN=LOC113502178 PE=3 SV=1	FALSE	FALSE	TRUE	3.91645	3	3	3	2.20813e+06	7.13
High	A0A7E5VFI1	Annulin-like isoform X1 OS=Trichoplusia ni OX=7111 GN=LOC113493318 PE=3 SV=1	FALSE	FALSE	TRUE	4.8366	3	3	3	2.20213e+06	7.87
High	A0A7E5VTZ6	Protein hu-li tai shao isoform X1 OS=Trichoplusia ni OX=7111 GN=LOC113496708 PE=3 SV=1	FALSE	FALSE	TRUE	6.54321	4	4	4	2.2004e+06	6.37
High	A0A7E5VIU7	Protein DEK-like isoform X1 OS=Trichoplusia ni OX=7111 GN=LOC113494226 PE=4 SV=1	FALSE	FALSE	TRUE	4.17957	2	2	2	2.18364e+06	5.52
High	A0A7E5VDC4	YTH domain-containing family protein 3 isoform X1 OS=Trichoplusia ni OX=7111 GN=LOC113492823 PE=4 SV=1	FALSE	FALSE	TRUE	6.58858	4	4	4	2.18084e+06	9.4
High	A0A7E5VBW1	Protein ROP isoform X2 OS=Trichoplusia ni OX=7111 GN=LOC113492505 PE=3 SV=1	FALSE	FALSE	TRUE	9.94854	5	5	5	2.17994e+06	12.18
High	A0A7E5WUP1	Opioid-binding protein/cell adhesion molecule-like OS=Trichoplusia ni OX=7111 GN=LOC113505655 PE=4 SV=1	FALSE	FALSE	TRUE	7.36196	3	3	3	2.17165e+06	6.74
High	A0A7E5V8Z5	Coronin OS=Trichoplusia ni OX=7111 GN=LOC113491793 PE=3 SV=1	FALSE	FALSE	TRUE	7.71679	7	7	7	2.14806e+06	12.03
High	A0A7E5VQ98	Eukaryotic translation initiation factor 5 OS=Trichoplusia ni OX=7111 GN=LOC113495776 PE=3 SV=1	FALSE	FALSE	TRUE	8.3691	4	4	4	2.1478e+06	7.19
High	A0A7E5X122	Methionine--tRNA ligase, cytoplasmic OS=Trichoplusia ni OX=7111 GN=LOC113507470 PE=3 SV=1	FALSE	FALSE	TRUE	6.28415	4	4	4	2.14593e+06	8.73
High	A0A7E5VAP0	Acylamino-acid-releasing enzyme OS=Trichoplusia ni OX=7111 GN=LOC113492196 PE=3 SV=1	FALSE	FALSE	TRUE	4.21348	3	3	3	2.14355e+06	1.61
High	P42212	Green fluorescent protein OS=Aequorea victoria GN=GFP PE=1 SV=1	TRUE	FALSE	FALSE	13.8655	3	3	3	2.13995e+06	5.7
High	A0A7E5WG13	Phospholipase A-2-activating protein OS=Trichoplusia ni OX=7111 GN=LOC113502317 PE=3 SV=1	FALSE	FALSE	TRUE	4.92866	3	3	3	2.11847e+06	5.41
High	A0A7E5V8N4	Filaggrin-2-like OS=Trichoplusia ni OX=7111 GN=LOC113491709 PE=4 SV=1	FALSE	FALSE	TRUE	6.9808	3	3	3	2.10772e+06	5.69
High	A0A7E5VKB9	Elongator complex protein 3 OS=Trichoplusia ni OX=7111 GN=LOC113494549 PE=3 SV=1	FALSE	FALSE	TRUE	7.92793	4	4	4	2.09292e+06	6.56
High	A0A7E5WNT0	LOW QUALITY PROTEIN: presequence protease, mitochondrial-like OS=Trichoplusia ni OX=7111 GN=LOC113504089 PE=4 SV=1	FALSE	FALSE	TRUE	5.61576	4	4	4	2.0925e+06	11.06
High	A0A7E5VN75	Uncharacterized protein LOC113495269 isoform X1 OS=Trichoplusia ni OX=7111 GN=LOC113495269 PE=3 SV=1	FALSE	FALSE	TRUE	15.8192	7	7	7	2.07832e+06	14.08
High	A0A7E5VIP3	tRNA (cytosine(34)-C(5))-methyltransferase OS=Trichoplusia ni OX=7111 GN=LOC113494141 PE=3 SV=1	FALSE	FALSE	TRUE	4.35374	3	3	3	2.05599e+06	4.17
High	A0A7E5WXT0	NADPH--cytochrome P450 reductase OS=Trichoplusia ni OX=7111 GN=LOC113507001 PE=3 SV=1	FALSE	FALSE	TRUE	6.84134	4	4	4	2.04432e+06	10.98
High	A0A7E5WV59	Neurotrimin-like OS=Trichoplusia ni OX=7111 GN=LOC113505500 PE=4 SV=1	FALSE	FALSE	TRUE	11.3402	4	4	4	2.04226e+06	8.93
High	A0A7E5VRX5	Speckle targeted PIP5K1A-regulated poly(A) polymerase-like OS=Trichoplusia ni OX=7111 GN=LOC113496117 PE=4 SV=1	FALSE	FALSE	TRUE	6.07867	4	4	4	2.016e+06	9.12
High	A0A7E5WNS7	Coatomer subunit beta' OS=Trichoplusia ni OX=7111 GN=LOC113504086 PE=3 SV=1	FALSE	FALSE	TRUE	9.3617	7	7	7	2003371	19.52
High	A0A7E5VSK8	Dolichyl-diphosphooligosaccharide--protein glycosyltransferase subunit 2 OS=Trichoplusia ni OX=7111 GN=LOC113496346 PE=3 SV=1	FALSE	FALSE	TRUE	12.7214	7	7	7	2.00274e+06	14.11
High	A0A7E5VHF7	non-specific serine/threonine protein kinase OS=Trichoplusia ni OX=7111 GN=LOC113493921 PE=4 SV=1	FALSE	FALSE	TRUE	16.0317	7	7	5	1.97638e+06	17.42
High	A0A7E5X445	Xaa-Pro aminopeptidase ApepP isoform X1 OS=Trichoplusia ni OX=7111 GN=LOC113508972 PE=3 SV=1	FALSE	FALSE	TRUE	7.60234	4	4	4	1.93035e+06	10.49
High	A0A7E5W0T4	Conserved oligomeric Golgi complex subunit 8 OS=Trichoplusia ni OX=7111 GN=LOC113498439 PE=3 SV=1	FALSE	FALSE	TRUE	9.18919	4	4	4	1.92019e+06	10.91
High	A0A7E5VG59	Importin subunit beta-1 OS=Trichoplusia ni OX=7111 GN=LOC113493477 PE=4 SV=1	FALSE	FALSE	TRUE	8.24859	6	6	6	1.89255e+06	10.92
High	A0A7E5VJM2	E3 ubiquitin-protein ligase OS=Trichoplusia ni OX=7111 GN=LOC113494377 PE=3 SV=1	FALSE	FALSE	TRUE	5	2	2	2	1.88425e+06	6.43
High	A0A7E5X1V3	Importin-7 isoform X1 OS=Trichoplusia ni OX=7111 GN=LOC113508374 PE=4 SV=1	FALSE	FALSE	TRUE	5.83255	5	5	5	1.86572e+06	13.45
High	A0A7E5VJS5	Protein 4.1 homolog isoform X1 OS=Trichoplusia ni OX=7111 GN=LOC113494423 PE=4 SV=1	FALSE	FALSE	TRUE	9.90066	20	20	20	1.85223e+06	45.13
High	A0A7E5WQI4	Luciferin 4-monooxygenase OS=Trichoplusia ni OX=7111 GN=LOC113504704 PE=3 SV=1	FALSE	FALSE	TRUE	3.30882	2	2	2	1.84442e+06	3.49
High	A0A7E5W011	Endoribonuclease Dicer OS=Trichoplusia ni OX=7111 GN=LOC113498214 PE=3 SV=1	FALSE	FALSE	TRUE	4.7025	8	8	4	1.81791e+06	20.54
High	A0A7E5V8N1	Calcium-transporting ATPase OS=Trichoplusia ni OX=7111 GN=LOC113491725 PE=3 SV=1	FALSE	FALSE	TRUE	7.11501	6	6	6	1.81473e+06	14.87
High	A0A7E5VF71	Eukaryotic translation initiation factor 4E-binding protein Mextli isoform X1 OS=Trichoplusia ni OX=7111 GN=LOC113493257 PE=4 SV=1	FALSE	FALSE	TRUE	6.65362	3	3	3	1.79274e+06	7.25
High	A0A7E5VD00	Beta-catenin-like protein 1 OS=Trichoplusia ni OX=7111 GN=LOC113492728 PE=4 SV=1	FALSE	FALSE	TRUE	5.7554	3	3	3	1.78549e+06	4.87
High	A0A7E5VHV3	Coatomer subunit gamma OS=Trichoplusia ni OX=7111 GN=LOC113493971 PE=3 SV=1	FALSE	FALSE	TRUE	6.38792	5	5	5	1.76573e+06	11.33
High	A0A7E5WVR9	Heat shock 70 kDa protein 14 OS=Trichoplusia ni OX=7111 GN=LOC113505648 PE=3 SV=1	FALSE	FALSE	TRUE	8.26271	3	3	3	1.71921e+06	6.89
High	A0A7E5VKL6	Spectrin alpha chain isoform X1 OS=Trichoplusia ni OX=7111 GN=LOC113494614 PE=3 SV=1	FALSE	FALSE	TRUE	2.85948	6	6	6	1.71832e+06	13.16
High	A0A7E5WZK8	Vigilin-like OS=Trichoplusia ni OX=7111 GN=LOC113506981 PE=4 SV=1	FALSE	FALSE	TRUE	4.82977	4	4	4	1.71786e+06	8.08
High	A0A7E5VQQ9	Tether containing UBX domain for GLUT4 isoform X1 OS=Trichoplusia ni OX=7111 GN=LOC113495775 PE=4 SV=1	FALSE	FALSE	TRUE	4.92126	2	2	2	1.70903e+06	5.33
High	A0A7E5VU17	Autophagy-related protein 16 isoform X1 OS=Trichoplusia ni OX=7111 GN=LOC113496719 PE=3 SV=1	FALSE	FALSE	TRUE	6.9808	3	3	3	1.6965e+06	9.42
High	A0A7E5VL33	DNA-directed RNA polymerase III subunit RPC5 OS=Trichoplusia ni OX=7111 GN=LOC113494687 PE=4 SV=1	FALSE	FALSE	TRUE	10.387	5	5	5	1.69123e+06	6.74
High	P02538	Keratin, type II cytoskeletal 6A OS=Homo sapiens GN=KRT6A PE=1 SV=3	TRUE	FALSE	FALSE	25.3546	15	15	2	1.69104e+06	25.21
High	A0A7E5VSR8	vesicle-fusing ATPase OS=Trichoplusia ni OX=7111 GN=LOC113496395 PE=3 SV=1	FALSE	FALSE	TRUE	4.77273	2	2	2	1.68689e+06	4.92
High	A0A7E5VGR5	Kelch-like protein diablo OS=Trichoplusia ni OX=7111 GN=LOC113493712 PE=4 SV=1	FALSE	FALSE	TRUE	5.96798	3	3	3	1.65515e+06	8.8
High	A0A7E5WMH5	U3 small nucleolar RNA-associated protein 15 homolog OS=Trichoplusia ni OX=7111 GN=LOC113503517 PE=4 SV=1	FALSE	FALSE	TRUE	7.22433	3	3	3	1.64203e+06	7.01
High	A0A7E5X4Q3	leucine--tRNA ligase OS=Trichoplusia ni OX=7111 GN=LOC113508534 PE=3 SV=1	FALSE	FALSE	TRUE	7.22789	7	7	7	1.64023e+06	14.98
High	A0A7E5WGD4	Exosome RNA helicase MTR4 OS=Trichoplusia ni OX=7111 GN=LOC113502214 PE=4 SV=1	FALSE	FALSE	TRUE	3.1068	3	3	3	1.61574e+06	6.23
High	A0A7E5WIN3	BOS complex subunit NCLN OS=Trichoplusia ni OX=7111 GN=LOC113502579 PE=3 SV=1	FALSE	FALSE	TRUE	9.81818	4	4	4	1.59817e+06	10.87
High	A0A7E5WIA1	N-terminal acetyltransferase B complex subunit MDM20 homolog OS=Trichoplusia ni OX=7111 GN=LOC113502879 PE=3 SV=1	FALSE	FALSE	TRUE	2.28509	2	2	2	1.5717e+06	5.13
High	A0A7E5W215	DNA replication licensing factor MCM5 OS=Trichoplusia ni OX=7111 GN=LOC113498723 PE=3 SV=1	FALSE	FALSE	TRUE	6.72154	4	4	4	1.57026e+06	8.08
High	A0A7E5VKZ8	Adenylosuccinate lyase OS=Trichoplusia ni OX=7111 GN=LOC113494722 PE=3 SV=1	FALSE	FALSE	TRUE	6.91057	3	3	3	1.56518e+06	7.01
High	A0A7E5VBK3	BRCA1-associated RING domain protein 1-like OS=Trichoplusia ni OX=7111 GN=LOC113492382 PE=4 SV=1	FALSE	FALSE	TRUE	4.87329	2	2	2	1.55285e+06	3.19
High	A0A7E5WC73	Nodal modulator 3 OS=Trichoplusia ni OX=7111 GN=LOC113501382 PE=4 SV=1	FALSE	FALSE	TRUE	6.23354	5	5	5	1.55101e+06	13.24
High	A0A7E5WDF3	6-phosphofructo-2-kinase/fructose-2, 6-bisphosphatase isoform X1 OS=Trichoplusia ni OX=7111 GN=LOC113501737 PE=3 SV=1	FALSE	FALSE	TRUE	6.75676	3	3	3	1.53917e+06	7.1
High	A0A7E5WJM6	Zinc finger RNA-binding protein isoform X1 OS=Trichoplusia ni OX=7111 GN=LOC113503285 PE=4 SV=1	FALSE	FALSE	TRUE	2.57787	2	2	2	1.52739e+06	5.55
High	A0A7E5VRJ0	Golgi resident protein GCP60 isoform X1 OS=Trichoplusia ni OX=7111 GN=LOC113496039 PE=4 SV=1	FALSE	FALSE	TRUE	4.83871	2	2	2	1.5114e+06	5.38
High	A0A7E5WU39	Uncharacterized protein LOC113505345 OS=Trichoplusia ni OX=7111 GN=LOC113505345 PE=4 SV=1	FALSE	FALSE	TRUE	10.4247	5	5	5	1.51088e+06	8.78
High	A0A7E5VB81	Programmed cell death protein 4 OS=Trichoplusia ni OX=7111 GN=LOC113492296 PE=3 SV=1	FALSE	FALSE	TRUE	5.58036	2	2	2	1.50593e+06	3.86
High	A0A7E5WTE2	Uncharacterized protein LOC113505176 OS=Trichoplusia ni OX=7111 GN=LOC113505176 PE=4 SV=1	FALSE	FALSE	TRUE	27.1845	2	2	2	1.50086e+06	5.6
High	A0A7E5VFW3	DNA replication licensing factor MCM3 OS=Trichoplusia ni OX=7111 GN=LOC113493407 PE=3 SV=1	FALSE	FALSE	TRUE	7.35661	5	6	5	1.49821e+06	14.4
High	A0A7E5WDK4	Aminopeptidase OS=Trichoplusia ni OX=7111 GN=LOC113501529 PE=3 SV=1	FALSE	FALSE	TRUE	4.00421	3	3	3	1.4859e+06	8.08
High	A0A7E5WQ82	4-coumarate--CoA ligase 1-like OS=Trichoplusia ni OX=7111 GN=LOC113504705 PE=3 SV=1	FALSE	FALSE	TRUE	6.61765	3	3	3	1.47201e+06	6.87
High	A0A7E5VSR9	Probable methylmalonate-semialdehyde dehydrogenase [acylating], mitochondrial OS=Trichoplusia ni OX=7111 GN=LOC113496236 PE=3 SV=1	FALSE	FALSE	TRUE	7.85441	3	3	3	1.46547e+06	7.25
High	A0A7E5WDY2	Cytoplasmic dynein 1 intermediate chain isoform X1 OS=Trichoplusia ni OX=7111 GN=LOC113501446 PE=3 SV=1	FALSE	FALSE	TRUE	5.80552	3	3	3	1.45067e+06	4.67
High	A0A7E5VYH3	Protein transport protein Sec31A isoform X1 OS=Trichoplusia ni OX=7111 GN=LOC113497802 PE=3 SV=1	FALSE	FALSE	TRUE	3.27869	3	3	3	1.44987e+06	9.38
High	A0A7E5VIY4	Uncharacterized protein LOC113494159 isoform X1 OS=Trichoplusia ni OX=7111 GN=LOC113494159 PE=4 SV=1	FALSE	FALSE	TRUE	2.657	2	2	2	1.44244e+06	4.61
High	A0A7E5X1W6	Platelet endothelial aggregation receptor 1-like OS=Trichoplusia ni OX=7111 GN=LOC113507719 PE=4 SV=1	FALSE	FALSE	TRUE	3.64146	2	2	2	1.44007e+06	5.66
High	A0A7E5X0Y8	Zinc finger CCHC domain-containing protein 9-like OS=Trichoplusia ni OX=7111 GN=LOC113507649 PE=4 SV=1	FALSE	FALSE	TRUE	7.79817	2	2	2	1.41778e+06	6.57
High	A0A7E5W8V7	N-alpha-acetyltransferase 15, NatA auxiliary subunit-like isoform X1 OS=Trichoplusia ni OX=7111 GN=LOC113500141 PE=4 SV=1	FALSE	FALSE	TRUE	4.06504	3	3	3	1.41688e+06	6.96
High	A0A7E5VA99	cGMP-dependent protein kinase OS=Trichoplusia ni OX=7111 GN=LOC113492093 PE=3 SV=1	FALSE	FALSE	TRUE	7.52688	5	6	5	1.36905e+06	12.84
High	A0A7E5VH18	Lon protease homolog, mitochondrial OS=Trichoplusia ni OX=7111 GN=LOC113493795 PE=3 SV=1	FALSE	FALSE	TRUE	5.12017	4	4	4	1.35549e+06	8.92
High	A0A7E5WI27	Eukaryotic translation initiation factor 3 subunit A OS=Trichoplusia ni OX=7111 GN=LOC113502878 PE=3 SV=1	FALSE	FALSE	TRUE	3.64407	4	4	4	1.34916e+06	4.04
High	A0A7E5W5G6	DNA replication licensing factor MCM2 OS=Trichoplusia ni OX=7111 GN=LOC113499445 PE=3 SV=1	FALSE	FALSE	TRUE	3.62401	3	3	3	1.34312e+06	6.17
High	A0A7E5VM63	Tyrosine-protein kinase OS=Trichoplusia ni OX=7111 GN=LOC113494943 PE=3 SV=1	FALSE	FALSE	TRUE	3.23625	3	3	2	1.33621e+06	4.18
High	A0A7E5WB72	Pyrimidodiazepine synthase-like OS=Trichoplusia ni OX=7111 GN=LOC113501099 PE=3 SV=1	FALSE	FALSE	TRUE	14.5669	3	3	3	1.31356e+06	7.38
High	A0A7E5WGP4	Pancreatic lipase-related protein 2 OS=Trichoplusia ni OX=7111 GN=LOC113502490 PE=3 SV=1	FALSE	FALSE	TRUE	4.37262	2	2	2	1.30393e+06	2.77
High	A0A7E5W5F9	Uncharacterized protein LOC113499599 OS=Trichoplusia ni OX=7111 GN=LOC113499599 PE=3 SV=1	FALSE	FALSE	TRUE	2.14953	2	2	2	1.29152e+06	4.91
High	A0A7E5WJ97	Major heat shock 70 kDa protein Ab-like OS=Trichoplusia ni OX=7111 GN=LOC113503195 PE=3 SV=1	FALSE	FALSE	TRUE	6.88	3	6	1	1.27325e+06	18.41
High	A0A7E5VSN9	Prolyl endopeptidase OS=Trichoplusia ni OX=7111 GN=LOC113496371 PE=3 SV=1	FALSE	FALSE	TRUE	4.31373	3	3	3	1.2715e+06	6.52
High	A0A7E5W1T2	ATP-dependent RNA helicase OS=Trichoplusia ni OX=7111 GN=LOC113498669 PE=3 SV=1	FALSE	FALSE	TRUE	5.49645	3	3	3	1.2679e+06	5.65
High	A0A7E5WVB3	Nuclear cap-binding protein subunit 3 OS=Trichoplusia ni OX=7111 GN=LOC113506120 PE=3 SV=1	FALSE	FALSE	TRUE	7.95699	3	3	3	1.26687e+06	7.89
High	A0A7E5VW94	KIF-binding protein OS=Trichoplusia ni OX=7111 GN=LOC113497275 PE=3 SV=1	FALSE	FALSE	TRUE	4.20875	2	2	2	1.2641e+06	4.63
High	A0A7E5WB31	Enhancer of mRNA-decapping protein 4 isoform X1 OS=Trichoplusia ni OX=7111 GN=LOC113501101 PE=3 SV=1	FALSE	FALSE	TRUE	2.63356	3	3	3	1.2549e+06	6.3
High	A0A7E5VYT2	Exportin-1 OS=Trichoplusia ni OX=7111 GN=LOC113497767 PE=3 SV=1	FALSE	FALSE	TRUE	5.84906	5	5	5	1.24912e+06	10.83
High	A0A7E5WZK6	Protein O-GlcNAcase isoform X1 OS=Trichoplusia ni OX=7111 GN=LOC113507217 PE=4 SV=1	FALSE	FALSE	TRUE	2.98651	2	2	2	1.24568e+06	5.53
High	A0A7E5X3M7	cysteine--tRNA ligase OS=Trichoplusia ni OX=7111 GN=LOC113508287 PE=3 SV=1	FALSE	FALSE	TRUE	7.19225	4	4	4	1.24327e+06	11.1
High	A0A7E5VG31	RNA helicase OS=Trichoplusia ni OX=7111 GN=LOC113493456 PE=3 SV=1	FALSE	FALSE	TRUE	4.27553	2	2	2	1.23913e+06	4.04
High	A0A7E5W121	Uncharacterized protein LOC113498483 isoform X2 OS=Trichoplusia ni OX=7111 GN=LOC113498483 PE=4 SV=1	FALSE	FALSE	TRUE	4.43787	3	3	3	1.2347e+06	6.83
High	A0A7E5W5G4	Uncharacterized protein LOC113499569 OS=Trichoplusia ni OX=7111 GN=LOC113499569 PE=3 SV=1	FALSE	FALSE	TRUE	2.41379	2	2	2	1.21878e+06	4.56
High	A0A7E5WKS7	Protein lingerer-like OS=Trichoplusia ni OX=7111 GN=LOC113503108 PE=4 SV=1	FALSE	FALSE	TRUE	4.11827	3	3	3	1.15654e+06	7.86
High	A0A7E5X0N9	Phosphorylase b kinase regulatory subunit OS=Trichoplusia ni OX=7111 GN=LOC113507984 PE=3 SV=1	FALSE	FALSE	TRUE	2.16	2	2	2	1.152e+06	5.39
High	A0A7E5WF33	Neuroglian isoform X1 OS=Trichoplusia ni OX=7111 GN=LOC113502124 PE=4 SV=1	FALSE	FALSE	TRUE	1.92771	2	2	2	1.13651e+06	5.36
High	A0A7E5WSI6	Uncharacterized protein LOC113505338 OS=Trichoplusia ni OX=7111 GN=LOC113505338 PE=4 SV=1	FALSE	FALSE	TRUE	3.55805	2	2	2	1.11924e+06	1.6
High	A0A7E5VU51	Glomulin-like isoform X1 OS=Trichoplusia ni OX=7111 GN=LOC113496685 PE=4 SV=1	FALSE	FALSE	TRUE	4.28082	2	2	2	1.11285e+06	5.31
High	A0A7E5WW29	Coatomer subunit beta OS=Trichoplusia ni OX=7111 GN=LOC113506395 PE=4 SV=1	FALSE	FALSE	TRUE	5.19878	4	4	4	1.10857e+06	9.72
High	A0A7E5VNL0	Glycogen debranching enzyme OS=Trichoplusia ni OX=7111 GN=LOC113495376 PE=3 SV=1	FALSE	FALSE	TRUE	1.50659	2	2	2	1.10488e+06	5.33
High	A0A7E5VDU5	Periodic tryptophan protein 1 homolog OS=Trichoplusia ni OX=7111 GN=LOC113492936 PE=4 SV=1	FALSE	FALSE	TRUE	5.38793	2	2	2	1.09749e+06	5.25
High	A0A7E5VJ98	Exportin-2 OS=Trichoplusia ni OX=7111 GN=LOC113494292 PE=3 SV=1	FALSE	FALSE	TRUE	2.37113	2	2	2	1.09453e+06	3.38
High	A0A7E5VD10	E3 SUMO-protein ligase RanBP2-like OS=Trichoplusia ni OX=7111 GN=LOC113492734 PE=4 SV=1	FALSE	FALSE	TRUE	1.30316	2	2	2	1.09263e+06	6.88
High	A0A7E5V9I1	Valine--tRNA ligase OS=Trichoplusia ni OX=7111 GN=LOC113491923 PE=3 SV=1	FALSE	FALSE	TRUE	2.68972	2	2	2	1.08802e+06	5.35
High	A0A7E5WPH0	GTP-binding protein 1 isoform X1 OS=Trichoplusia ni OX=7111 GN=LOC113504522 PE=4 SV=1	FALSE	FALSE	TRUE	4.20032	2	2	2	1.0812e+06	5.23
High	A0A7E5WSU1	Heterogeneous nuclear ribonucleoprotein U-like protein 1 OS=Trichoplusia ni OX=7111 GN=LOC113505054 PE=4 SV=1	FALSE	FALSE	TRUE	2.61538	3	3	3	1.07584e+06	7.86
High	A0A7E5X2W4	La-related protein 1-like OS=Trichoplusia ni OX=7111 GN=LOC113508673 PE=4 SV=1	FALSE	FALSE	TRUE	6.16225	5	5	5	1.07467e+06	14.15
High	A0A7E5VU14	Uncharacterized protein LOC113496571 OS=Trichoplusia ni OX=7111 GN=LOC113496571 PE=4 SV=1	FALSE	FALSE	TRUE	5.52995	2	2	2	1.0713e+06	3.64
High	A0A7E5VUG7	Translation initiation factor eIF-2B subunit delta isoform X1 OS=Trichoplusia ni OX=7111 GN=LOC113496780 PE=3 SV=1	FALSE	FALSE	TRUE	8.16024	4	4	4	1.06825e+06	9.72
High	A0A7E5WVS7	Multiple inositol polyphosphate phosphatase 1 OS=Trichoplusia ni OX=7111 GN=LOC113505659 PE=3 SV=1	FALSE	FALSE	TRUE	5.41761	2	2	2	1.05992e+06	4.85
High	A0A7E5WS43	Tubulin--tyrosine ligase-like protein 12 OS=Trichoplusia ni OX=7111 GN=LOC113504841 PE=4 SV=1	FALSE	FALSE	TRUE	5.86319	3	3	3	1.05421e+06	4.24
High	A0A7E5W2N9	acetyl-CoA carboxylase OS=Trichoplusia ni OX=7111 GN=LOC113498903 PE=4 SV=1	FALSE	FALSE	TRUE	3.125	6	6	6	1.04079e+06	13.3
High	A0A7E5WXF7	LOW QUALITY PROTEIN: importin-5-like OS=Trichoplusia ni OX=7111 GN=LOC113506199 PE=4 SV=1	FALSE	FALSE	TRUE	13.0102	8	9	1	1.03717e+06	19.48
High	Q7Z794	Keratin, type II cytoskeletal 1b OS=Homo sapiens GN=KRT77 PE=2 SV=3	TRUE	FALSE	FALSE	9.68858	6	6	2	1.03704e+06	9.85
High	A0A7E5W2Z2	Transforming acidic coiled-coil-containing protein 2-like OS=Trichoplusia ni OX=7111 GN=LOC113498922 PE=3 SV=1	FALSE	FALSE	TRUE	4.92424	3	3	3	1.03475e+06	4
High	A0A7E5W722	LOW QUALITY PROTEIN: laminin subunit alpha OS=Trichoplusia ni OX=7111 GN=LOC113499980 PE=4 SV=1	FALSE	FALSE	TRUE	1.50502	5	5	5	1.02735e+06	4.45
High	A0A7E5WTK7	Vacuolar protein sorting-associated protein 26B-like OS=Trichoplusia ni OX=7111 GN=LOC113505141 PE=3 SV=1	FALSE	FALSE	TRUE	8.29493	3	3	3	1.0241e+06	6.7
High	A0A7E5WCB3	V-type proton ATPase subunit a OS=Trichoplusia ni OX=7111 GN=LOC113501436 PE=3 SV=1	FALSE	FALSE	TRUE	2.33645	2	2	1	1.01444e+06	4.19
High	A0A7E5WYK4	Gem-associated protein 5-like OS=Trichoplusia ni OX=7111 GN=LOC113507272 PE=4 SV=1	FALSE	FALSE	TRUE	2.43137	3	3	3	1.00942e+06	4.41
High	A0A7E5WIB2	Gephyrin OS=Trichoplusia ni OX=7111 GN=LOC113502955 PE=3 SV=1	FALSE	FALSE	TRUE	4.71545	2	2	2	1.00422e+06	5.35
High	A0A7E5W1E8	AP-2 complex subunit alpha OS=Trichoplusia ni OX=7111 GN=LOC113498581 PE=3 SV=1	FALSE	FALSE	TRUE	4.41335	4	4	4	998238	2.69
High	A0A7E5W1U8	Calpain-7-like isoform X1 OS=Trichoplusia ni OX=7111 GN=LOC113498687 PE=3 SV=1	FALSE	FALSE	TRUE	7.42138	5	5	5	995936	9.25
High	A0A7E5WUF2	RNA helicase OS=Trichoplusia ni OX=7111 GN=LOC113505432 PE=4 SV=1	FALSE	FALSE	TRUE	4.8913	3	3	3	994543	7.59
High	A0A7E5VN77	Melanotransferrin OS=Trichoplusia ni OX=7111 GN=LOC113495295 PE=4 SV=1	FALSE	FALSE	TRUE	3.48837	2	2	2	930074	5.59
High	A0A7E5VQ65	Selenoprotein O OS=Trichoplusia ni OX=7111 GN=LOC113495728 PE=3 SV=1	FALSE	FALSE	TRUE	3.63636	2	2	2	922935	2.83
High	A0A7E5W030	Protein LSM14 homolog A OS=Trichoplusia ni OX=7111 GN=LOC113498215 PE=3 SV=1	FALSE	FALSE	TRUE	4.51977	2	2	2	895991	5.93
High	A0A7E5W4L7	Fucosyltransferase OS=Trichoplusia ni OX=7111 GN=LOC113499332 PE=3 SV=1	FALSE	FALSE	TRUE	5.34521	2	2	2	895187	3.72
High	A0A7E5W2Y6	Neurochondrin homolog OS=Trichoplusia ni OX=7111 GN=LOC113498920 PE=3 SV=1	FALSE	FALSE	TRUE	6.3772	4	4	4	879375	7.46
High	A0A7E5VW99	Tyrosine-protein kinase OS=Trichoplusia ni OX=7111 GN=LOC113497265 PE=3 SV=1	FALSE	FALSE	TRUE	7.44275	4	4	4	876129	4.52
High	A0A7E5WDM1	Lamin-C-like OS=Trichoplusia ni OX=7111 GN=LOC113501742 PE=3 SV=1	FALSE	FALSE	TRUE	5.21173	3	3	3	869766	7.06
High	P04040	Catalase OS=Homo sapiens GN=CAT PE=1 SV=3	TRUE	FALSE	FALSE	7.21063	3	3	3	866649	5.45
High	A0A7E5WV26	Sorting nexin-7-like OS=Trichoplusia ni OX=7111 GN=LOC113505560 PE=4 SV=1	FALSE	FALSE	TRUE	4.40252	2	2	2	863143	4.53
High	A0A7E5W8K1	Probable ubiquitin carboxyl-terminal hydrolase creB OS=Trichoplusia ni OX=7111 GN=LOC113500421 PE=4 SV=1	FALSE	FALSE	TRUE	3.96825	2	2	2	861232	5.18
High	A0A7E5W1S9	Glycogen [starch] synthase OS=Trichoplusia ni OX=7111 GN=LOC113498597 PE=3 SV=1	FALSE	FALSE	TRUE	3.03907	2	2	2	854871	5.2
High	A0A7E5WTM1	Acyl-CoA dehydrogenase family member 9, mitochondrial OS=Trichoplusia ni OX=7111 GN=LOC113505582 PE=4 SV=1	FALSE	FALSE	TRUE	3.45395	2	3	2	853711	5.96
High	A0A7E5X0P3	Nuclear pore complex protein Nup50-like OS=Trichoplusia ni OX=7111 GN=LOC113507998 PE=4 SV=1	FALSE	FALSE	TRUE	9.15254	3	3	3	845096	7.45
High	A0A7E5W0N1	Protein transport protein Sec24C isoform X1 OS=Trichoplusia ni OX=7111 GN=LOC113498362 PE=3 SV=1	FALSE	FALSE	TRUE	2.17391	2	2	2	843867	5.86
High	A0A7E5W0Q1	Beta-1,3-glucan-binding protein-like OS=Trichoplusia ni OX=7111 GN=LOC113498326 PE=3 SV=1	FALSE	FALSE	TRUE	7.25806	4	4	3	835737	5.08
High	A0A7E5WJF1	Vanin-like protein 2 isoform X1 OS=Trichoplusia ni OX=7111 GN=LOC113503225 PE=3 SV=1	FALSE	FALSE	TRUE	23.1343	9	10	1	833082	28.61
High	A0A7E5WBU3	Golgin subfamily A member 2 OS=Trichoplusia ni OX=7111 GN=LOC113501252 PE=4 SV=1	FALSE	FALSE	TRUE	3.55619	2	2	2	819613	5.36
High	A0A7E5VQL8	4-coumarate--CoA ligase 1-like OS=Trichoplusia ni OX=7111 GN=LOC113495823 PE=3 SV=1	FALSE	FALSE	TRUE	7.92254	3	3	3	818296	9.9
High	A0A7E5X3I3	Coiled-coil and C2 domain-containing protein 1-like isoform X1 OS=Trichoplusia ni OX=7111 GN=LOC113508184 PE=3 SV=1	FALSE	FALSE	TRUE	4.65116	4	4	4	815261	7.01
High	A0A7E5X1S9	Dynein light intermediate chain OS=Trichoplusia ni OX=7111 GN=LOC113507896 PE=3 SV=1	FALSE	FALSE	TRUE	8.52878	3	3	3	809033	8.63
High	A0A7E5VXG3	LOW QUALITY PROTEIN: exocyst complex component 3-like OS=Trichoplusia ni OX=7111 GN=LOC113497628 PE=3 SV=1	FALSE	FALSE	TRUE	3.87701	3	3	3	807403	4.75
High	A0A7E5WES3	non-specific serine/threonine protein kinase OS=Trichoplusia ni OX=7111 GN=LOC113501668 PE=4 SV=1	FALSE	FALSE	TRUE	6.59794	3	3	1	805831	6.41
High	A0A7E5X2Y6	Microtubule-associated protein 1A-like OS=Trichoplusia ni OX=7111 GN=LOC113508695 PE=3 SV=1	FALSE	FALSE	TRUE	1.16279	2	2	2	784341	4.28
High	A0A7E5WR64	Collagen type IV alpha-3-binding protein OS=Trichoplusia ni OX=7111 GN=LOC113504850 PE=4 SV=1	FALSE	FALSE	TRUE	7.4141	3	3	3	766732	9.1
High	A0A7E5WDR2	Carnitine O-acetyltransferase OS=Trichoplusia ni OX=7111 GN=LOC113501564 PE=3 SV=1	FALSE	FALSE	TRUE	5.40123	3	3	3	763505	7.17
High	A0A7E5WCF8	EGF domain-specific O-linked N-acetylglucosamine transferase OS=Trichoplusia ni OX=7111 GN=LOC113501220 PE=4 SV=1	FALSE	FALSE	TRUE	3.83142	2	2	2	750602	4.09
High	A0A7E5VWB4	NPC intracellular cholesterol transporter 1 isoform X1 OS=Trichoplusia ni OX=7111 GN=LOC113497190 PE=3 SV=1	FALSE	FALSE	TRUE	1.19581	2	2	2	742639	0
High	A0A7E5WUC3	25S rRNA (Cytosine-C(5))-methyltransferase nop2 OS=Trichoplusia ni OX=7111 GN=LOC113505801 PE=3 SV=1	FALSE	FALSE	TRUE	5.54951	4	4	4	738337	6.78
High	A0A7E5WZG7	Serine/threonine-protein phosphatase OS=Trichoplusia ni OX=7111 GN=LOC113506972 PE=3 SV=1	FALSE	FALSE	TRUE	5.45455	2	2	2	737222	4.62
High	A0A7E5VPQ6	DNA polymerase epsilon subunit OS=Trichoplusia ni OX=7111 GN=LOC113495663 PE=3 SV=1	FALSE	FALSE	TRUE	6.83112	3	3	3	736732	5.41
High	A0A7E5WIZ7	DNA replication licensing factor MCM4 OS=Trichoplusia ni OX=7111 GN=LOC113503128 PE=3 SV=1	FALSE	FALSE	TRUE	3.25203	2	2	2	712866	5.26
High	A0A7E5VGY0	ATP-dependent Clp protease ATP-binding subunit clpX-like, mitochondrial isoform X2 OS=Trichoplusia ni OX=7111 GN=LOC113493766 PE=4 SV=1	FALSE	FALSE	TRUE	4.06091	2	2	2	708396	6.51
High	P02769	Serum albumin OS=Bos taurus GN=ALB PE=1 SV=4	TRUE	FALSE	FALSE	7.90774	5	5	3	684321	9.32
High	A0A7E5WRJ9	Uncharacterized protein LOC113504943 isoform X1 OS=Trichoplusia ni OX=7111 GN=LOC113504943 PE=4 SV=1	FALSE	FALSE	TRUE	2.99685	2	2	2	664218	3.7
High	A0A7E5X0I7	LOW QUALITY PROTEIN: protein DENND6A-like OS=Trichoplusia ni OX=7111 GN=LOC113507270 PE=4 SV=1	FALSE	FALSE	TRUE	3.92157	2	2	2	663797	4.93
High	A0A7E5VVH7	Serine/threonine-protein kinase RIO1 OS=Trichoplusia ni OX=7111 GN=LOC113497136 PE=3 SV=1	FALSE	FALSE	TRUE	4.04624	2	2	2	653184	4.35
High	A0A7E5VZG2	tRNA-t(6)A37 methylthiotransferase OS=Trichoplusia ni OX=7111 GN=LOC113498034 PE=3 SV=1	FALSE	FALSE	TRUE	4.81481	2	2	2	652572	4.87
High	A0A7E5VGM4	Uncharacterized protein LOC113493678 isoform X1 OS=Trichoplusia ni OX=7111 GN=LOC113493678 PE=4 SV=1	FALSE	FALSE	TRUE	6.77507	2	2	2	646506	5.38
High	A0A7E5VGX7	Nucleolin-like OS=Trichoplusia ni OX=7111 GN=LOC113493677 PE=4 SV=1	FALSE	FALSE	TRUE	6.15641	3	3	3	645189	7.36
High	A0A7E5VIH8	Protein CASC3 OS=Trichoplusia ni OX=7111 GN=LOC113494111 PE=3 SV=1	FALSE	FALSE	TRUE	4.72879	2	2	2	636222	6.32
High	A0A7E5W4K7	Uncharacterized protein LOC113499326 isoform X1 OS=Trichoplusia ni OX=7111 GN=LOC113499326 PE=4 SV=1	FALSE	FALSE	TRUE	6.65138	3	3	3	626988	1.98
High	A0A7E5WML8	Alpha-1,3-mannosyl-glycoprotein 2-beta-N-acetylglucosaminyltransferase OS=Trichoplusia ni OX=7111 GN=LOC113504095 PE=3 SV=1	FALSE	FALSE	TRUE	4.0724	2	2	2	617665	2.89
High	A0A7E5W421	N-terminal kinase-like protein OS=Trichoplusia ni OX=7111 GN=LOC113498919 PE=4 SV=1	FALSE	FALSE	TRUE	3.07125	2	2	2	590160	4.36
High	A0A7E5W1Q2	Uncharacterized protein LOC113498436 isoform X1 OS=Trichoplusia ni OX=7111 GN=LOC113498436 PE=4 SV=1	FALSE	FALSE	TRUE	3.26945	2	2	2	588435	4.71
High	A0A7E5W423	protein kinase C OS=Trichoplusia ni OX=7111 GN=LOC113499200 PE=3 SV=1	FALSE	FALSE	TRUE	4.29799	2	2	2	570717	4.58
High	A0A7E5WGH2	Guanine nucleotide-binding protein-like 3 homolog OS=Trichoplusia ni OX=7111 GN=LOC113502427 PE=4 SV=1	FALSE	FALSE	TRUE	3.63951	2	2	2	557062	3.82
High	A0A7E5WGU7	Protein slender lobes-like OS=Trichoplusia ni OX=7111 GN=LOC113502523 PE=4 SV=1	FALSE	FALSE	TRUE	5.29942	7	7	7	556261	18.54
High	A0A7E5WIH3	Protein misato OS=Trichoplusia ni OX=7111 GN=LOC113502532 PE=3 SV=1	FALSE	FALSE	TRUE	4.23573	2	2	2	506568	4.56
High	Q86YZ3	Hornerin OS=Homo sapiens GN=HRNR PE=1 SV=2	TRUE	FALSE	FALSE	4.94737	3	3	3	438271	8.96
High	A0A7E5VP95	oxoglutarate dehydrogenase (succinyl-transferring) OS=Trichoplusia ni OX=7111 GN=LOC113495459 PE=3 SV=1	FALSE	FALSE	TRUE	2.16777	2	2	2	396202	4.22
High	A0A7E5WNR9	Uncharacterized protein LOC113504329 OS=Trichoplusia ni OX=7111 GN=LOC113504329 PE=3 SV=1	FALSE	FALSE	TRUE	2.73271	2	2	2	377702	4.62
High	A0A7E5VYW9	Disks large 1 tumor suppressor protein isoform X1 OS=Trichoplusia ni OX=7111 GN=LOC113497791 PE=3 SV=1	FALSE	FALSE	TRUE	3.125	2	2	2	348154	5.47
High	A0A7E5W9D6	V-type proton ATPase subunit a OS=Trichoplusia ni OX=7111 GN=LOC113500605 PE=3 SV=1	FALSE	FALSE	TRUE	2.50896	2	2	1	333791	4.54
High	A0A7E5WQV4	asparaginase OS=Trichoplusia ni OX=7111 GN=LOC113504784 PE=4 SV=1	FALSE	FALSE	TRUE	4.89731	2	2	2	322934	6.53
High	P04259	Keratin, type II cytoskeletal 6B OS=Homo sapiens GN=KRT6B PE=1 SV=5	TRUE	FALSE	FALSE	25.3546	15	15	1	302603	25.47
High	A0A7E5WVW5	Endoribonuclease Dicer-like OS=Trichoplusia ni OX=7111 GN=LOC113506323 PE=4 SV=1	FALSE	FALSE	TRUE	18.6486	5	5	1	275716	12.61
High	A0A7E5VH54	Peroxisomal N(1)-acetyl-spermine/spermidine oxidase-like OS=Trichoplusia ni OX=7111 GN=LOC113493827 PE=4 SV=1	FALSE	FALSE	TRUE	6.19835	2	2	2	258922	5.29
High	A0A7E5WPC2	Annexin OS=Trichoplusia ni OX=7111 GN=LOC113504468 PE=3 SV=1	FALSE	FALSE	TRUE	5.06329	2	2	2	239443	5.36
High	A0A7E5V8T5	Peroxisomal targeting signal 1 receptor OS=Trichoplusia ni OX=7111 GN=LOC113491735 PE=3 SV=1	FALSE	FALSE	TRUE	5.64972	2	2	2	238991	5.17
High	A0A7E5WQN8	dolichyl-diphosphooligosaccharide--protein glycotransferase OS=Trichoplusia ni OX=7111 GN=LOC113504736 PE=3 SV=1	FALSE	FALSE	TRUE	3.3462	2	2	2	237727	4.18
High	A0A7E5X032	Cyclin-dependent kinase 14 isoform X1 OS=Trichoplusia ni OX=7111 GN=LOC113507794 PE=4 SV=1	FALSE	FALSE	TRUE	4.34783	2	2	1	184427	2.48
High	A0A7E5VRT5	3-phosphoinositide-dependent protein kinase 1 OS=Trichoplusia ni OX=7111 GN=LOC113496147 PE=3 SV=1	FALSE	FALSE	TRUE	3.76766	2	2	2	178796	4
High	A0A7E5W3S9	Serine/threonine-protein phosphatase 4 regulatory subunit 3 isoform X1 OS=Trichoplusia ni OX=7111 GN=LOC113499109 PE=3 SV=1	FALSE	FALSE	TRUE	2.65823	2	2	2	155620	4.78
High	A0A7E5WSK8	Pre-mRNA-processing factor 39 isoform X1 OS=Trichoplusia ni OX=7111 GN=LOC113504863 PE=4 SV=1	FALSE	FALSE	TRUE	2.87984	2	2	2	60195.1	4.75
High	A0A7E5WW79	Methyltransferase-like protein 13 OS=Trichoplusia ni OX=7111 GN=LOC113506453 PE=4 SV=1	FALSE	FALSE	TRUE	12.1495	3	3	1		7.45
High	A0A7E5VCN0	Cytosolic non-specific dipeptidase OS=Trichoplusia ni OX=7111 GN=LOC113492664 PE=3 SV=1	FALSE	FALSE	TRUE	5.43933	2	2	2		5.63
High	A0A7E5VIV5	Far upstream element-binding protein 3 isoform X2 OS=Trichoplusia ni OX=7111 GN=LOC113494229 PE=4 SV=1	FALSE	FALSE	TRUE	15.1976	8	8	1		18.89
High	A0A7E5VJ04	Far upstream element-binding protein 3 isoform X1 OS=Trichoplusia ni OX=7111 GN=LOC113494229 PE=4 SV=1	FALSE	FALSE	TRUE	14.4258	8	8	1		19.26

## Sheet: 9b
PII no PDI			PII hPDI			PII sPDI
UV 1_280			UV 1_280			UV 1_280
ml	mAU		ml	mAU		ml	mAU
0	1.14651		0	1.06618		-0.012899	6.0728
0.001	1.17361		0.001	1.06888		-0.012275	6.06959
0.001	1.20067		0.001	1.07159		-0.011651	6.06947
0.002	1.2276		0.002	1.07428		-0.011027	6.06979
0.003	1.25318		0.002	1.07695		-0.010403	6.06974
0.003	1.27712		0.003	1.07962		-0.009779	6.06989
0.004	1.30071		0.004	1.0823		-0.009155	6.06978
0.004	1.3181		0.004	1.08498		-0.008531	6.06996
0.005	1.3154		0.005	1.08766		-0.007906	6.07011
0.006	1.31267		0.005	1.09032		-0.007282	6.07001
0.006	1.30996		0.006	1.0928		-0.006658	6.0699
0.007	1.3077		0.007	1.09515		-0.006034	6.07041
0.007	1.30713		0.007	1.09751		-0.00541	6.07017
0.008	1.30676		0.008	1.09859		-0.004786	6.06967
0.009	1.30638		0.008	1.09736		-0.004162	6.06951
0.009	1.30601		0.009	1.09584		-0.003538	6.06852
0.01	1.30563		0.009	1.09434		-0.002914	6.06843
0.01	1.30526		0.01	1.09301		-0.00229	6.06812
0.011	1.30482		0.011	1.09296		-0.001666	6.06842
0.012	1.30389		0.011	1.09291		-0.001042	6.06802
0.012	1.30268		0.012	1.09286		-0.000417	6.06755
0.013	1.30146		0.012	1.09282		0.000207	6.06692
0.013	1.30025		0.013	1.09278		0.000831	6.06681
0.014	1.29904		0.014	1.09273		0.001455	6.06726
0.015	1.29782		0.014	1.09269		0.002079	6.06894
0.015	1.29661		0.015	1.09263		0.002703	6.07108
0.016	1.29656		0.015	1.09254		0.003327	6.07338
0.016	1.2987		0.016	1.09243		0.003951	6.07356
0.017	1.30093		0.016	1.09233		0.004575	6.07343
0.018	1.30316		0.017	1.09223		0.005199	6.07439
0.018	1.30541		0.018	1.09213		0.005823	6.0751
0.019	1.30764		0.018	1.09203		0.006447	6.0762
0.019	1.30987		0.019	1.09193		0.007071	6.07714
0.02	1.31204		0.019	1.09171		0.007696	6.07815
0.021	1.31352		0.02	1.09162		0.00832	6.0789
0.021	1.31481		0.021	1.09157		0.008944	6.07955
0.022	1.31609		0.021	1.09151		0.009568	6.07988
0.022	1.31738		0.022	1.09146		0.010192	6.08061
0.023	1.31867		0.022	1.0914		0.010816	6.08033
0.024	1.31996		0.023	1.09135		0.01144	6.08026
0.024	1.32125		0.024	1.09155		0.012064	6.08118
0.025	1.3221		0.024	1.09231		0.012688	6.082
0.025	1.32292		0.025	1.09343		0.013312	6.08225
0.026	1.32377		0.025	1.09455		0.013936	6.08317
0.027	1.32462		0.026	1.09567		0.01456	6.08376
0.027	1.32546		0.026	1.0968		0.015185	6.08424
0.028	1.32628		0.027	1.09791		0.015809	6.08491
0.028	1.32706		0.028	1.09903		0.016433	6.08455
0.029	1.32744		0.028	1.09973		0.017057	6.08431
0.03	1.32693		0.029	1.10008		0.017681	6.08471
0.03	1.32546		0.029	1.10039		0.018305	6.08506
0.031	1.32393		0.03	1.10069		0.018929	6.08495
0.031	1.32238		0.031	1.101		0.019553	6.08492
0.032	1.32084		0.031	1.1013		0.020177	6.08434
0.033	1.31929		0.032	1.1016		0.020801	6.0843
0.033	1.31775		0.032	1.10203		0.021425	6.08477
0.034	1.31725		0.033	1.10276		0.022049	6.08537
0.034	1.3188		0.033	1.10372		0.022673	6.08477
0.035	1.3207		0.034	1.10468		0.023298	6.0848
0.036	1.32258		0.035	1.10564		0.023922	6.08596
0.036	1.32447		0.035	1.1066		0.024546	6.08745
0.037	1.32637		0.036	1.10756		0.02517	6.08781
0.037	1.32826		0.036	1.10853		0.025794	6.08849
0.038	1.32978		0.037	1.10947		0.026418	6.08889
0.039	1.32993		0.038	1.11064		0.027042	6.08855
0.039	1.32925		0.038	1.11182		0.027666	6.08797
0.04	1.32857		0.039	1.113		0.02829	6.08866
0.04	1.32789		0.039	1.11417		0.028914	6.0882
0.041	1.3272		0.04	1.11535		0.029538	6.08721
0.042	1.32652		0.04	1.11652		0.030162	6.08596
0.042	1.3254		0.041	1.11758		0.030786	6.08443
0.043	1.32323		0.042	1.11766		0.031411	6.08378
0.043	1.32086		0.042	1.11687		0.032035	6.08294
0.044	1.31851		0.043	1.11607		0.032659	6.08218
0.045	1.31613		0.043	1.11528		0.033283	6.08056
0.045	1.31376		0.044	1.11449		0.033907	6.0791
0.046	1.31141		0.045	1.1137		0.034531	6.07743
0.046	1.30906		0.045	1.11297		0.035155	6.07726
0.047	1.30675		0.046	1.11275		0.035779	6.07698
0.048	1.30264		0.046	1.11375		0.036403	6.07601
0.048	1.29848		0.047	1.11475		0.037027	6.07433
0.049	1.29429		0.048	1.11575		0.037651	6.07241
0.049	1.29013		0.048	1.11675		0.038275	6.07063
0.05	1.28597		0.049	1.11776		0.0389	6.06919
0.051	1.2818		0.049	1.11876		0.039524	6.06787
0.051	1.278		0.05	1.11999		0.040148	6.06639
0.052	1.27544		0.05	1.12345		0.040772	6.06536
0.052	1.27345		0.051	1.12854		0.041396	6.06491
0.053	1.27149		0.052	1.13379		0.04202	6.06432
0.054	1.26952		0.052	1.139		0.042644	6.06342
0.054	1.26755		0.053	1.14421		0.043268	6.06224
0.055	1.26559		0.053	1.14943		0.043892	6.0613
0.055	1.26363		0.054	1.15514		0.044516	6.06039
0.056	1.262		0.055	1.1652		0.04514	6.05912
0.057	1.2609		0.055	1.1919		0.045764	6.0579
0.057	1.25985		0.056	1.21813		0.046388	6.05668
0.058	1.25879		0.056	1.24449		0.047013	6.05576
0.058	1.25774		0.057	1.27059		0.047637	6.05538
0.059	1.25668		0.057	1.29685		0.048261	6.05573
0.06	1.25563		0.058	1.32334		0.048885	6.05569
0.06	1.25472		0.059	1.34976		0.049509	6.05601
0.061	1.25507		0.059	1.37226		0.050133	6.05684
0.061	1.25557		0.06	1.39221		0.050757	6.05721
0.062	1.25606		0.06	1.4118		0.051381	6.05761
0.062	1.25656		0.061	1.43152		0.052005	6.05787
0.063	1.25705		0.062	1.45123		0.052629	6.05793
0.064	1.25755		0.062	1.47083		0.053253	6.05812
0.064	1.25805		0.063	1.4905		0.053877	6.0582
0.065	1.25594		0.063	1.50934		0.054501	6.05771
0.065	1.25259		0.064	1.52391		0.055126	6.05655
0.066	1.24904		0.065	1.53486		0.05575	6.05524
0.067	1.2455		0.065	1.54568		0.056374	6.05467
0.067	1.24195		0.066	1.55639		0.056998	6.0543
0.068	1.23841		0.066	1.56662		0.057622	6.05333
0.068	1.23486		0.067	1.57717		0.058246	6.05279
0.069	1.23008		0.067	1.58797		0.05887	6.05321
0.07	1.22371		0.068	1.5977		0.059494	6.05305
0.07	1.2168		0.069	1.60526		0.060118	6.05319
0.071	1.2099		0.069	1.6117		0.060742	6.05436
0.071	1.20299		0.07	1.61815		0.061366	6.05458
0.072	1.19601		0.07	1.6246		0.06199	6.05476
0.073	1.18906		0.071	1.63103		0.062615	6.05532
0.073	1.18226		0.072	1.63747		0.063239	6.05592
0.074	1.17621		0.072	1.64385		0.063863	6.05685
0.074	1.17037		0.073	1.64966		0.064487	6.05718
0.075	1.16445		0.073	1.65373		0.065111	6.057
0.076	1.15853		0.074	1.65779		0.065735	6.05677
0.076	1.15258		0.074	1.66185		0.066359	6.05642
0.077	1.14662		0.075	1.66592		0.066983	6.05596
0.077	1.14062		0.076	1.66997		0.067607	6.05589
0.078	1.13449		0.076	1.67403		0.068231	6.05663
0.079	1.12819		0.077	1.67763		0.068855	6.05783
0.079	1.12185		0.077	1.67961		0.069479	6.0587
0.08	1.11554		0.078	1.68087		0.070103	6.05848
0.08	1.10919		0.079	1.68214		0.070728	6.05814
0.081	1.10288		0.079	1.68341		0.071352	6.05837
0.082	1.09662		0.08	1.68467		0.071976	6.0584
0.082	1.08927		0.08	1.68593		0.0726	6.05802
0.083	1.07936		0.081	1.6871		0.073224	6.05776
0.083	1.06943		0.082	1.68683		0.073848	6.05792
0.084	1.05952		0.082	1.68203		0.074472	6.05814
0.085	1.04967		0.083	1.67721		0.075096	6.0579
0.085	1.03986		0.083	1.67241		0.07572	6.05774
0.086	1.03005		0.084	1.66765		0.076344	6.05843
0.086	1.02019		0.084	1.66281		0.076968	6.05892
0.087	1.00917		0.085	1.658		0.077592	6.05897
0.088	0.998182		0.086	1.65131		0.078217	6.05863
0.088	0.987184		0.086	1.62884		0.078841	6.05842
0.089	0.97618		0.087	1.6019		0.079465	6.05756
0.089	0.965179		0.087	1.57477		0.080089	6.05689
0.09	0.954188		0.088	1.54751		0.080713	6.05621
0.091	0.943199		0.089	1.52003		0.081337	6.0553
0.091	0.931032		0.089	1.4925		0.081961	6.05483
0.092	0.918329		0.09	1.46484		0.082585	6.05384
0.092	0.905524		0.09	1.43939		0.083209	6.05365
0.093	0.8927		0.091	1.41715		0.083833	6.05385
0.094	0.879819		0.091	1.3957		0.084457	6.05329
0.094	0.86682		0.092	1.37412		0.085081	6.05274
0.095	0.853869		0.093	1.35237		0.085705	6.0531
0.095	0.842315		0.093	1.33056		0.08633	6.05268
0.096	0.831865		0.094	1.3087		0.086954	6.05168
0.097	0.821583		0.094	1.28845		0.087578	6.05179
0.097	0.811286		0.095	1.27223		0.088202	6.05154
0.098	0.800921		0.096	1.25833		0.088826	6.05138
0.098	0.790568		0.096	1.24443		0.08945	6.05152
0.099	0.78014		0.097	1.23054		0.090074	6.051
0.1	0.772161		0.097	1.21656		0.090698	6.05078
0.1	0.766159		0.098	1.20258		0.091322	6.05029
0.101	0.760581		0.098	1.18932		0.091946	6.04878
0.101	0.754985		0.099	1.17823		0.09257	6.04831
0.102	0.749374		0.1	1.16857		0.093194	6.04841
0.103	0.743804		0.1	1.15888		0.093818	6.04807
0.103	0.738194		0.101	1.14922		0.094443	6.04756
0.104	0.733252		0.101	1.13957		0.095067	6.04699
0.104	0.729112		0.102	1.12993		0.095691	6.04639
0.105	0.725111		0.103	1.12065		0.096315	6.04589
0.106	0.721128		0.103	1.11288		0.096939	6.04553
0.106	0.717167		0.104	1.10634		0.097563	6.04553
0.107	0.71319		0.104	1.09979		0.098187	6.04616
0.107	0.709225		0.105	1.09326		0.098811	6.04651
0.108	0.70468		0.106	1.08675		0.099435	6.04589
0.109	0.699854		0.106	1.08025		0.100059	6.04484
0.109	0.69497		0.107	1.07381		0.100683	6.04402
0.11	0.690093		0.107	1.06784		0.101307	6.04422
0.11	0.685175		0.108	1.06247		0.101932	6.04481
0.111	0.680311		0.108	1.05713		0.102556	6.04441
0.112	0.675403		0.109	1.05177		0.10318	6.04368
0.112	0.671365		0.11	1.0464		0.103804	6.04335
0.113	0.669894		0.11	1.04101		0.104428	6.04345
0.113	0.66848		0.111	1.03562		0.105052	6.04392
0.114	0.667049		0.111	1.03104		0.105676	6.04464
0.115	0.66563		0.112	1.02823		0.1063	6.04476
0.115	0.664209		0.113	1.02542		0.106924	6.0443
0.116	0.662756		0.113	1.0226		0.107548	6.044
0.116	0.660737		0.114	1.01977		0.108172	6.04352
0.117	0.658494		0.114	1.01696		0.108796	6.04368
0.118	0.656242		0.115	1.01416		0.10942	6.04444
0.118	0.653984		0.115	1.01145		0.110045	6.04493
0.119	0.651754		0.116	1.00873		0.110669	6.04478
0.119	0.649495		0.117	1.00601		0.111293	6.04464
0.12	0.647241		0.117	1.0033		0.111917	6.04404
0.121	0.644788		0.118	1.00057		0.112541	6.04346
0.121	0.642175		0.118	0.997861		0.113165	6.04362
0.122	0.639702		0.119	0.995159		0.113789	6.04411
0.122	0.63723		0.12	0.992666		0.114413	6.04434
0.123	0.634755		0.12	0.991201		0.115037	6.04388
0.124	0.63226		0.121	0.989681		0.115661	6.04399
0.124	0.629782		0.121	0.98815		0.116285	6.04425
0.125	0.627619		0.122	0.986615		0.116909	6.04415
0.125	0.626843		0.123	0.985077		0.117533	6.04481
0.126	0.626308		0.123	0.983534		0.118158	6.04563
0.127	0.625773		0.124	0.982049		0.118782	6.04492
0.127	0.625236		0.124	0.981731		0.119406	6.04486
0.128	0.624703		0.125	0.98151		0.12003	6.04523
0.128	0.624168		0.125	0.98129		0.120654	6.0447
0.129	0.62356		0.126	0.981072		0.121278	6.04426
0.13	0.622717		0.127	0.980852		0.121902	6.0438
0.13	0.621824		0.127	0.980631		0.122526	6.0436
0.131	0.620926		0.128	0.980374		0.12315	6.0442
0.131	0.620034		0.128	0.980387		0.123774	6.04449
0.132	0.619139		0.129	0.980468		0.124398	6.04403
0.133	0.618241		0.13	0.980549		0.125022	6.04376
0.133	0.617296		0.13	0.98063		0.125647	6.04382
0.134	0.616216		0.131	0.980711		0.126271	6.04341
0.134	0.615087		0.131	0.980792		0.126895	6.04397
0.135	0.61401		0.132	0.980843		0.127519	6.04528
0.136	0.612996		0.132	0.980096		0.128143	6.04606
0.136	0.612006		0.133	0.979338		0.128767	6.04678
0.137	0.610955		0.134	0.978591		0.129391	6.04716
0.137	0.609849		0.134	0.977845		0.130015	6.04725
0.138	0.609635		0.135	0.977101		0.130639	6.0476
0.139	0.609936		0.135	0.97635		0.131263	6.04775
0.139	0.610241		0.136	0.975604		0.131887	6.04815
0.14	0.610546		0.137	0.975642		0.132511	6.0479
0.14	0.610852		0.137	0.97567		0.133135	6.04746
0.141	0.611158		0.138	0.975697		0.13376	6.048
0.142	0.611414		0.138	0.975726		0.134384	6.0486
0.142	0.611493		0.139	0.975753		0.135008	6.04852
0.143	0.611447		0.14	0.975781		0.135632	6.04817
0.143	0.611401		0.14	0.975808		0.136256	6.0475
0.144	0.611356		0.141	0.976381		0.13688	6.04679
0.145	0.61131		0.141	0.977096		0.137504	6.04707
0.145	0.611265		0.142	0.977816		0.138128	6.04728
0.146	0.612407		0.142	0.97853		0.138752	6.04751
0.146	0.616391		0.143	0.979247		0.139376	6.04796
0.147	0.621611		0.144	0.979967		0.14	6.04815
0.148	0.626775		0.144	0.980684		0.140624	6.04789
0.148	0.631953		0.145	0.981918		0.141249	6.04783
0.149	0.637101		0.145	0.983279		0.141873	6.04869
0.149	0.642233		0.146	0.984653		0.142497	6.04915
0.15	0.648145		0.147	0.986025		0.143121	6.04982
0.151	0.657402		0.147	0.987393		0.143745	6.05053
0.151	0.668127		0.148	0.988758		0.144369	6.04999
0.152	0.678764		0.148	0.990121		0.144993	6.04947
0.152	0.689506		0.149	0.992336		0.145617	6.04901
0.153	0.700224		0.149	0.995185		0.146241	6.04939
0.154	0.710939		0.15	0.998133		0.146865	6.04949
0.154	0.722409		0.151	1.00109		0.147489	6.04972
0.155	0.739718		0.151	1.00407		0.148113	6.0496
0.155	0.759548		0.152	1.00704		0.148737	6.04913
0.156	0.779419		0.152	1.01001		0.149362	6.04908
0.157	0.799315		0.153	1.01321		0.149986	6.05044
0.157	0.819103		0.154	1.01641		0.15061	6.05095
0.158	0.839041		0.154	1.01951		0.151234	6.05056
0.158	0.859603		0.155	1.02262		0.151858	6.05113
0.159	0.88754		0.155	1.02573		0.152482	6.05224
0.16	0.917985		0.156	1.02883		0.153106	6.05246
0.16	0.948315		0.156	1.03194		0.15373	6.05345
0.161	0.978504		0.157	1.036		0.154354	6.05441
0.161	1.00857		0.158	1.04144		0.154978	6.05475
0.162	1.03879		0.158	1.04745		0.155602	6.05475
0.163	1.06959		0.159	1.05343		0.156226	6.05534
0.163	1.10671		0.159	1.05936		0.15685	6.05477
0.164	1.14432		0.16	1.06537		0.157475	6.0549
0.164	1.18176		0.161	1.07135		0.158099	6.05444
0.165	1.21952		0.161	1.07854		0.158723	6.05307
0.166	1.25732		0.162	1.09006		0.159347	6.05243
0.166	1.29512		0.162	1.10414		0.159971	6.05156
0.167	1.33256		0.163	1.11823		0.160595	6.0501
0.167	1.37601		0.164	1.13237		0.161219	6.04938
0.168	1.41995		0.164	1.14646		0.161843	6.04832
0.169	1.46352		0.165	1.16059		0.162467	6.04877
0.169	1.50717		0.165	1.17561		0.163091	6.04874
0.17	1.55053		0.166	1.19482		0.163715	6.04842
0.17	1.59444		0.166	1.21761		0.164339	6.0487
0.171	1.6377		0.167	1.24023		0.164964	6.0484
0.172	1.68504		0.168	1.26274		0.165588	6.04812
0.172	1.73237		0.168	1.28532		0.166212	6.04796
0.173	1.77903		0.169	1.30792		0.166836	6.04877
0.173	1.82684		0.169	1.33115		0.16746	6.04925
0.174	1.87369		0.17	1.35715		0.168084	6.04958
0.175	1.92125		0.171	1.38624		0.168708	6.04876
0.175	1.9688		0.171	1.41532		0.169332	6.04946
0.176	2.01521		0.172	1.44421		0.169956	6.04963
0.176	2.05971		0.172	1.47239		0.17058	6.04933
0.177	2.10411		0.173	1.49926		0.171204	6.04948
0.178	2.14901		0.173	1.5247		0.171828	6.04948
0.178	2.19321		0.174	1.55056		0.172452	6.04996
0.179	2.23755		0.175	1.58186		0.173077	6.0502
0.179	2.28212		0.175	1.615		0.173701	6.05071
0.18	2.32543		0.176	1.64837		0.174325	6.05103
0.181	2.36427		0.176	1.68192		0.174949	6.05117
0.181	2.40305		0.177	1.71544		0.175573	6.05196
0.182	2.44189		0.178	1.74908		0.176197	6.05237
0.182	2.48055		0.178	1.78273		0.176821	6.05312
0.183	2.51942		0.179	1.81878		0.177445	6.05375
0.184	2.5581		0.179	1.85564		0.178069	6.05364
0.184	2.59363		0.18	1.89227		0.178693	6.05348
0.185	2.61919		0.181	1.92878		0.179317	6.0533
0.185	2.64479		0.181	1.96527		0.179941	6.05422
0.186	2.67036		0.182	2.00163		0.180565	6.0541
0.187	2.6959		0.182	2.03782		0.18119	6.05388
0.187	2.72148		0.183	2.07439		0.181814	6.05367
0.188	2.74654		0.183	2.11105		0.182438	6.05389
0.188	2.76887		0.184	2.14756		0.183062	6.05452
0.189	2.78113		0.185	2.18408		0.183686	6.05455
0.189	2.79301		0.185	2.22063		0.18431	6.0546
0.19	2.80547		0.186	2.25733		0.184934	6.0544
0.191	2.81869		0.186	2.29405		0.185558	6.05448
0.191	2.83231		0.187	2.33008		0.186182	6.05563
0.192	2.8461		0.188	2.36501		0.186806	6.05659
0.192	2.85907		0.188	2.39943		0.18743	6.05699
0.193	2.86427		0.189	2.43394		0.188054	6.05797
0.194	2.86673		0.189	2.46861		0.188679	6.05914
0.194	2.86918		0.19	2.50317		0.189303	6.06008
0.195	2.87164		0.19	2.53777		0.189927	6.06137
0.195	2.87409		0.191	2.57182		0.190551	6.06307
0.196	2.87653		0.192	2.60333		0.191175	6.0657
0.197	2.87896		0.192	2.6312		0.191799	6.06838
0.197	2.8738		0.193	2.65918		0.192423	6.07055
0.198	2.86643		0.193	2.68702		0.193047	6.07343
0.198	2.85906		0.194	2.71504		0.193671	6.07631
0.199	2.85169		0.195	2.74295		0.194295	6.07923
0.2	2.84431		0.195	2.77049		0.194919	6.0826
0.2	2.83695		0.196	2.79394		0.195543	6.08636
0.201	2.82958		0.196	2.81088		0.196167	6.09013
0.201	2.81688		0.197	2.82789		0.196792	6.09407
0.202	2.80172		0.198	2.84496		0.197416	6.09789
0.203	2.78634		0.198	2.86198		0.19804	6.10191
0.203	2.77096		0.199	2.87907		0.198664	6.10698
0.204	2.75552		0.199	2.89565		0.199288	6.11153
0.204	2.74004		0.2	2.90899		0.199912	6.1175
0.205	2.72454		0.2	2.91659		0.200536	6.12403
0.206	2.70707		0.201	2.92417		0.20116	6.13079
0.206	2.68834		0.202	2.93174		0.201784	6.13767
0.207	2.6694		0.202	2.9393		0.202408	6.14447
0.207	2.65032		0.203	2.94687		0.203032	6.15103
0.208	2.63134		0.203	2.9542		0.203656	6.1585
0.209	2.6123		0.204	2.95894		0.204281	6.16671
0.209	2.5932		0.205	2.95798		0.204905	6.17512
0.21	2.57206		0.205	2.95702		0.205529	6.18412
0.21	2.54943		0.206	2.95606		0.206153	6.19543
0.211	2.52668		0.206	2.95511		0.206777	6.20761
0.212	2.50374		0.207	2.95415		0.207401	6.22217
0.212	2.48082		0.207	2.95307		0.208025	6.2357
0.213	2.45804		0.208	2.9505		0.208649	6.24944
0.213	2.43519		0.209	2.94301		0.209273	6.26501
0.214	2.41285		0.209	2.93543		0.209897	6.27952
0.215	2.39074		0.21	2.92796		0.210521	6.29465
0.215	2.36872		0.21	2.92045		0.211145	6.30809
0.216	2.34677		0.211	2.91297		0.211769	6.32134
0.216	2.32466		0.212	2.90533		0.212394	6.33236
0.217	2.30279		0.212	2.89643		0.213018	6.34342
0.218	2.28076		0.213	2.88514		0.213642	6.35526
0.218	2.25906		0.213	2.87376		0.214266	6.36623
0.219	2.23679		0.214	2.86238		0.21489	6.37719
0.219	2.21446		0.215	2.851		0.215514	6.38847
0.22	2.19236		0.215	2.83961		0.216138	6.4003
0.221	2.17001		0.216	2.82829		0.216762	6.41191
0.221	2.14786		0.216	2.81634		0.217386	6.42293
0.222	2.12543		0.217	2.80271		0.21801	6.43521
0.222	2.10359		0.217	2.78899		0.218634	6.4481
0.223	2.08366		0.218	2.77518		0.219258	6.46048
0.224	2.06344		0.219	2.7615		0.219882	6.47251
0.224	2.04356		0.219	2.74769		0.220507	6.48567
0.225	2.02339		0.22	2.73395		0.221131	6.49814
0.225	2.00333		0.22	2.72015		0.221755	6.50976
0.226	1.98335		0.221	2.70412		0.222379	6.52083
0.227	1.96334		0.222	2.68796		0.223003	6.53224
0.227	1.94441		0.222	2.67186		0.223627	6.54458
0.228	1.92516		0.223	2.65564		0.224251	6.55594
0.228	1.90611		0.223	2.63945		0.224875	6.5657
0.229	1.88691		0.224	2.62325		0.225499	6.57567
0.23	1.86771		0.224	2.60694		0.226123	6.58552
0.23	1.84851		0.225	2.5899		0.226747	6.59523
0.231	1.82961		0.226	2.57341		0.227371	6.60501
0.231	1.81282		0.226	2.55785		0.227996	6.61384
0.232	1.79577		0.227	2.54322		0.22862	6.62291
0.233	1.77865		0.227	2.52855		0.229244	6.63198
0.233	1.7616		0.228	2.51305		0.229868	6.64072
0.234	1.74455		0.229	2.49654		0.230492	6.64912
0.234	1.72741		0.229	2.479		0.231116	6.65722
0.235	1.71064		0.23	2.46135		0.23174	6.66455
0.236	1.69482		0.23	2.44407		0.232364	6.6711
0.236	1.67863		0.231	2.42673		0.232988	6.67881
0.237	1.66234		0.231	2.40934		0.233612	6.6857
0.237	1.64606		0.232	2.39194		0.234236	6.69243
0.238	1.62981		0.233	2.37457		0.23486	6.69766
0.239	1.61354		0.233	2.3574		0.235484	6.70219
0.239	1.59819		0.234	2.34131		0.236109	6.70681
0.24	1.58551		0.234	2.32564		0.236733	6.71079
0.24	1.57366		0.235	2.31015		0.237357	6.71211
0.241	1.56192		0.236	2.29466		0.237981	6.71268
0.242	1.55048		0.236	2.27939		0.238605	6.71234
0.242	1.53973		0.237	2.26411		0.239229	6.71185
0.243	1.52947		0.237	2.24834		0.239853	6.70992
0.243	1.51893		0.238	2.23316		0.240477	6.70801
0.244	1.50787		0.239	2.21806		0.241101	6.70688
0.245	1.4975		0.239	2.20289		0.241725	6.70673
0.245	1.48698		0.24	2.18792		0.242349	6.7064
0.246	1.47646		0.24	2.17286		0.242973	6.70711
0.246	1.46595		0.241	2.15792		0.243597	6.70897
0.247	1.45532		0.241	2.14326		0.244222	6.71084
0.248	1.44466		0.242	2.1295		0.244846	6.71192
0.248	1.43372		0.243	2.11598		0.24547	6.7137
0.249	1.42304		0.243	2.10235		0.246094	6.71555
0.249	1.41239		0.244	2.0888		0.246718	6.71662
0.25	1.40183		0.244	2.07518		0.247342	6.71766
0.251	1.39128		0.245	2.06151		0.247966	6.71865
0.251	1.38078		0.246	2.04805		0.24859	6.71884
0.252	1.37027		0.246	2.03575		0.249214	6.71832
0.252	1.3604		0.247	2.024		0.249838	6.71807
0.253	1.35134		0.247	2.0122		0.250462	6.7178
0.254	1.34231		0.248	2.00045		0.251086	6.71727
0.254	1.33327		0.248	1.98866		0.251711	6.71701
0.255	1.32432		0.249	1.97692		0.252335	6.71648
0.255	1.31537		0.25	1.96487		0.252959	6.71623
0.256	1.30635		0.25	1.95312		0.253583	6.71649
0.257	1.29845		0.251	1.94188		0.254207	6.71573
0.257	1.29155		0.251	1.9307		0.254831	6.71325
0.258	1.28472		0.252	1.9195		0.255455	6.71313
0.258	1.27785		0.253	1.90829		0.256079	6.71252
0.259	1.271		0.253	1.89705		0.256703	6.71181
0.26	1.26416		0.254	1.8856		0.257327	6.71127
0.26	1.25733		0.254	1.87466		0.257951	6.71117
0.261	1.25123		0.255	1.86437		0.258575	6.71008
0.261	1.24596		0.256	1.85419		0.259199	6.70964
0.262	1.24087		0.256	1.84396		0.259824	6.70955
0.263	1.23572		0.257	1.83374		0.260448	6.70914
0.263	1.23061		0.257	1.82357		0.261072	6.70792
0.264	1.22547		0.258	1.81361		0.261696	6.70709
0.264	1.22021		0.258	1.80521		0.26232	6.70666
0.265	1.21456		0.259	1.7984		0.262944	6.70512
0.266	1.20935		0.26	1.79183		0.263568	6.70427
0.266	1.20452		0.26	1.78527		0.264192	6.70155
0.267	1.19964		0.261	1.77874		0.264816	6.70097
0.267	1.19478		0.261	1.77221		0.26544	6.70037
0.268	1.18993		0.262	1.76551		0.266064	6.6988
0.269	1.18504		0.263	1.75863		0.266688	6.69739
0.269	1.1807		0.263	1.75212		0.267312	6.69625
0.27	1.17673		0.264	1.74592		0.267937	6.69369
0.27	1.17283		0.264	1.73968		0.268561	6.69289
0.271	1.16894		0.265	1.73342		0.269185	6.69109
0.272	1.16505		0.265	1.72717		0.269809	6.68909
0.272	1.16116		0.266	1.72077		0.270433	6.68733
0.273	1.15728		0.267	1.71431		0.271057	6.68676
0.273	1.15314		0.267	1.70864		0.271681	6.68476
0.274	1.1492		0.268	1.70349		0.272305	6.68292
0.275	1.1453		0.268	1.69833		0.272929	6.67928
0.275	1.14142		0.269	1.69313		0.273553	6.67758
0.276	1.13743		0.27	1.68796		0.274177	6.67617
0.276	1.13361		0.27	1.68281		0.274801	6.67431
0.277	1.12971		0.271	1.67786		0.275426	6.6727
0.278	1.12568		0.271	1.67392		0.27605	6.67144
0.278	1.12213		0.272	1.67061		0.276674	6.66977
0.279	1.11856		0.273	1.66729		0.277298	6.66781
0.279	1.11504		0.273	1.66398		0.277922	6.66722
0.28	1.11147		0.274	1.66067		0.278546	6.66568
0.281	1.10791		0.274	1.65735		0.27917	6.66379
0.281	1.10438		0.275	1.654		0.279794	6.66259
0.282	1.10101		0.275	1.65065		0.280418	6.66144
0.282	1.09796		0.276	1.64745		0.281042	6.65967
0.283	1.09488		0.277	1.64432		0.281666	6.65888
0.284	1.09183		0.277	1.64114		0.28229	6.65808
0.284	1.08875		0.278	1.638		0.282914	6.65718
0.285	1.08569		0.278	1.63482		0.283539	6.65604
0.285	1.08262		0.279	1.63163		0.284163	6.65473
0.286	1.07963		0.28	1.62817		0.284787	6.65287
0.287	1.07676		0.28	1.62559		0.285411	6.65195
0.287	1.07388		0.281	1.62306		0.286035	6.65181
0.288	1.07099		0.281	1.62041		0.286659	6.65023
0.288	1.06811		0.282	1.61761		0.287283	6.64898
0.289	1.06525		0.282	1.61472		0.287907	6.64718
0.29	1.06234		0.283	1.61181		0.288531	6.64638
0.29	1.05919		0.284	1.60912		0.289155	6.64536
0.291	1.0556		0.284	1.60686		0.289779	6.64428
0.291	1.05204		0.285	1.60482		0.290403	6.64302
0.292	1.04848		0.285	1.60278		0.291027	6.64122
0.293	1.04491		0.286	1.60074		0.291652	6.63861
0.293	1.04134		0.287	1.59869		0.292276	6.63741
0.294	1.03785		0.287	1.59665		0.2929	6.63605
0.294	1.03479		0.288	1.59371		0.293524	6.63457
0.295	1.03245		0.288	1.58941		0.294148	6.63316
0.296	1.03012		0.289	1.58463		0.294772	6.63202
0.296	1.02791		0.289	1.57987		0.295396	6.6305
0.297	1.02567		0.29	1.57513		0.29602	6.62772
0.297	1.02328		0.291	1.57038		0.296644	6.62619
0.298	1.02076		0.291	1.56561		0.297268	6.62607
0.299	1.01823		0.292	1.56111		0.297892	6.6254
0.299	1.01587		0.292	1.55735		0.298516	6.62353
0.3	1.01437		0.293	1.55412		0.299141	6.62297
0.3	1.01293		0.294	1.55088		0.299765	6.62209
0.301	1.01148		0.294	1.54764		0.300389	6.62111
0.302	1.01003		0.295	1.5444		0.301013	6.6202
0.302	1.00859		0.295	1.54115		0.301637	6.61876
0.303	1.00714		0.296	1.5381		0.302261	6.61741
0.303	1.00565		0.297	1.53595		0.302885	6.61677
0.304	1.00294		0.297	1.53453		0.303509	6.61529
0.305	1.00023		0.298	1.53311		0.304133	6.61464
0.305	0.997539		0.298	1.53169		0.304757	6.61366
0.306	0.99485		0.299	1.53026		0.305381	6.61242
0.306	0.992151		0.299	1.52883		0.306005	6.61189
0.307	0.989485		0.3	1.52723		0.306629	6.61081
0.308	0.98766		0.301	1.52462		0.307254	6.61028
0.308	0.986938		0.301	1.52126		0.307878	6.60799
0.309	0.986211		0.302	1.51792		0.308502	6.60642
0.309	0.985484		0.302	1.51457		0.309126	6.60444
0.31	0.98476		0.303	1.51121		0.30975	6.60317
0.311	0.984032		0.304	1.50787		0.310374	6.60191
0.311	0.983307		0.304	1.50455		0.310998	6.60053
0.312	0.982698		0.305	1.50145		0.311622	6.59944
0.312	0.982386		0.305	1.49868		0.312246	6.59838
0.313	0.982074		0.306	1.4959		0.31287	6.59768
0.314	0.981763		0.306	1.49312		0.313494	6.59686
0.314	0.981453		0.307	1.49034		0.314118	6.59501
0.315	0.98114		0.308	1.48756		0.314743	6.59367
0.315	0.980827		0.308	1.48477		0.315367	6.59178
0.316	0.980394		0.309	1.48196		0.315991	6.59054
0.316	0.979274		0.309	1.47983		0.316615	6.5883
0.317	0.97815		0.31	1.47769		0.317239	6.58682
0.318	0.977018		0.311	1.47554		0.317863	6.58485
0.318	0.975899		0.311	1.47341		0.318487	6.58393
0.319	0.974766		0.312	1.4713		0.319111	6.58247
0.319	0.973662		0.312	1.46915		0.319735	6.58045
0.32	0.972528		0.313	1.46692		0.320359	6.57783
0.321	0.97108		0.314	1.46445		0.320983	6.57536
0.321	0.969583		0.314	1.46197		0.321607	6.57291
0.322	0.968085		0.315	1.45949		0.322231	6.57105
0.322	0.966581		0.315	1.45702		0.322856	6.56944
0.323	0.965076		0.316	1.45454		0.32348	6.56686
0.324	0.96357		0.316	1.45208		0.324104	6.56555
0.324	0.962457		0.317	1.44981		0.324728	6.56425
0.325	0.961932		0.318	1.44855		0.325352	6.56355
0.325	0.961524		0.318	1.44757		0.325976	6.5619
0.326	0.961121		0.319	1.44657		0.3266	6.5601
0.327	0.960717		0.319	1.44559		0.327224	6.55946
0.327	0.960314		0.32	1.4446		0.327848	6.55731
0.328	0.959911		0.321	1.44361		0.328472	6.55526
0.328	0.958683		0.321	1.44263		0.329096	6.55451
0.329	0.956065		0.322	1.44168		0.32972	6.55424
0.33	0.952927		0.322	1.44069		0.330344	6.55276
0.33	0.949802		0.323	1.43971		0.330969	6.55084
0.331	0.946677		0.323	1.43873		0.331593	6.54987
0.331	0.943561		0.324	1.43774		0.332217	6.54837
0.332	0.940441		0.325	1.43676		0.332841	6.54728
0.333	0.938074		0.325	1.43565		0.333465	6.54529
0.333	0.937408		0.326	1.43397		0.334089	6.54318
0.334	0.937225		0.326	1.43199		0.334713	6.54312
0.334	0.937042		0.327	1.43002		0.335337	6.54186
0.335	0.936859		0.328	1.42804		0.335961	6.53997
0.336	0.936678		0.328	1.42605		0.336585	6.5385
0.336	0.936495		0.329	1.42407		0.337209	6.53611
0.337	0.936249		0.329	1.42158		0.337833	6.53513
0.337	0.935338		0.33	1.41729		0.338458	6.5339
0.338	0.934321		0.331	1.41289		0.339082	6.53329
0.339	0.9333		0.331	1.40847		0.339706	6.53214
0.339	0.932284		0.332	1.40405		0.34033	6.53038
0.34	0.931264		0.332	1.39966		0.340954	6.52943
0.34	0.930247		0.333	1.39541		0.341578	6.52739
0.341	0.928575		0.333	1.39168		0.342202	6.52673
0.342	0.925982		0.334	1.38962		0.342826	6.52573
0.342	0.923408		0.335	1.38782		0.34345	6.52454
0.343	0.920845		0.335	1.38588		0.344074	6.52155
0.343	0.918264		0.336	1.38387		0.344698	6.519
0.344	0.915666		0.336	1.38183		0.345322	6.51746
0.345	0.912998		0.337	1.37977		0.345946	6.51669
0.345	0.909954		0.338	1.37772		0.346571	6.51612
0.346	0.907169		0.338	1.37637		0.347195	6.51477
0.346	0.904387		0.339	1.37549		0.347819	6.51414
0.347	0.901607		0.339	1.3746		0.348443	6.51301
0.348	0.898817		0.34	1.3737		0.349067	6.51264
0.348	0.896062		0.34	1.37282		0.349691	6.51118
0.349	0.893461		0.341	1.37194		0.350315	6.51116
0.349	0.891135		0.342	1.37088		0.350939	6.51028
0.35	0.88933		0.342	1.36932		0.351563	6.50901
0.351	0.887457		0.343	1.36753		0.352187	6.50915
0.351	0.885441		0.343	1.36574		0.352811	6.50814
0.352	0.883389		0.344	1.36395		0.353435	6.50708
0.352	0.881331		0.345	1.36218		0.354059	6.5074
0.353	0.879274		0.345	1.36041		0.354684	6.5069
0.354	0.877444		0.346	1.35863		0.355308	6.50495
0.354	0.876061		0.346	1.35692		0.355932	6.50359
0.355	0.874678		0.347	1.35537		0.356556	6.50218
0.355	0.873296		0.347	1.35383		0.35718	6.50149
0.356	0.871913		0.348	1.35229		0.357804	6.50176
0.357	0.870538		0.349	1.35076		0.358428	6.50053
0.357	0.86917		0.349	1.34923		0.359052	6.49947
0.358	0.867628		0.35	1.3477		0.359676	6.49839
0.358	0.866195		0.35	1.34606		0.3603	6.49661
0.359	0.864823		0.351	1.34417		0.360924	6.49534
0.36	0.863463		0.352	1.34223		0.361548	6.4941
0.36	0.862109		0.352	1.3403		0.362173	6.49301
0.361	0.860764		0.353	1.33836		0.362797	6.49149
0.361	0.859415		0.353	1.33642		0.363421	6.49042
0.362	0.857808		0.354	1.3345		0.364045	6.48981
0.363	0.855796		0.355	1.33271		0.364669	6.48871
0.363	0.853789		0.355	1.33114		0.365293	6.488
0.364	0.85177		0.356	1.32957		0.365917	6.48625
0.364	0.849755		0.356	1.328		0.366541	6.48552
0.365	0.847772		0.357	1.32643		0.367165	6.48505
0.366	0.845736		0.357	1.32485		0.367789	6.48358
0.366	0.843523		0.358	1.32328		0.368413	6.48253
0.367	0.841158		0.359	1.32287		0.369037	6.48103
0.367	0.838782		0.359	1.32478		0.369661	6.47873
0.368	0.836427		0.36	1.3272		0.370286	6.47812
0.369	0.834033		0.36	1.32961		0.37091	6.47717
0.369	0.831643		0.361	1.33202		0.371534	6.4771
0.37	0.829378		0.362	1.33444		0.372158	6.47628
0.37	0.827717		0.362	1.3368		0.372782	6.47611
0.371	0.826544		0.363	1.33781		0.373406	6.47497
0.372	0.825371		0.363	1.33703		0.37403	6.47313
0.372	0.824198		0.364	1.33597		0.374654	6.47189
0.373	0.823018		0.364	1.33492		0.375278	6.47143
0.373	0.82185		0.365	1.33387		0.375902	6.47194
0.374	0.820852		0.366	1.33281		0.376526	6.47152
0.375	0.820344		0.366	1.33176		0.37715	6.47042
0.375	0.82013		0.367	1.33051		0.377775	6.46938
0.376	0.819916		0.367	1.32898		0.378399	6.46812
0.376	0.819703		0.368	1.32735		0.379023	6.46731
0.377	0.81949		0.369	1.32573		0.379647	6.46546
0.378	0.819278		0.369	1.32411		0.380271	6.46381
0.378	0.818692		0.37	1.32249		0.380895	6.46265
0.379	0.817203		0.37	1.32087		0.381519	6.46171
0.379	0.815302		0.371	1.31922		0.382143	6.46042
0.38	0.813409		0.372	1.31794		0.382767	6.45955
0.381	0.811535		0.372	1.3169		0.383391	6.45848
0.381	0.809651		0.373	1.31585		0.384015	6.4585
0.382	0.807774		0.373	1.31482		0.384639	6.45828
0.382	0.805998		0.374	1.31378		0.385263	6.45674
0.383	0.803987		0.374	1.31275		0.385888	6.45535
0.384	0.801917		0.375	1.31269		0.386512	6.45521
0.384	0.799862		0.376	1.31312		0.387136	6.45413
0.385	0.797784		0.376	1.31356		0.38776	6.45284
0.385	0.795711		0.377	1.31399		0.388384	6.45191
0.386	0.79365		0.377	1.31443		0.389008	6.45054
0.387	0.791645		0.378	1.31486		0.389632	6.4496
0.387	0.791396		0.379	1.3153		0.390256	6.44881
0.388	0.791408		0.379	1.31547		0.39088	6.44839
0.388	0.791427		0.38	1.31553		0.391504	6.44758
0.389	0.791446		0.38	1.31559		0.392128	6.44626
0.39	0.791465		0.381	1.31566		0.392752	6.44549
0.39	0.791484		0.381	1.31571		0.393376	6.44517
0.391	0.791442		0.382	1.31578		0.394001	6.44463
0.391	0.790657		0.383	1.31584		0.394625	6.44301
0.392	0.789773		0.383	1.31564		0.395249	6.44043
0.393	0.788873		0.384	1.31519		0.395873	6.44035
0.393	0.787984		0.384	1.31469		0.396497	6.43888
0.394	0.787096		0.385	1.31418		0.397121	6.43849
0.394	0.786198		0.386	1.31368		0.397745	6.43747
0.395	0.785018		0.386	1.31319		0.398369	6.43651
0.396	0.783023		0.387	1.31274		0.398993	6.43609
0.396	0.780843		0.387	1.31235		0.399617	6.43489
0.397	0.778651		0.388	1.31203		0.400241	6.43386
0.397	0.776465		0.389	1.31171		0.400865	6.43424
0.398	0.774277		0.389	1.31137		0.40149	6.43302
0.399	0.772105		0.39	1.31104		0.402114	6.43222
0.399	0.76999		0.39	1.3107		0.402738	6.43088
0.4	0.767972		0.391	1.31036		0.403362	6.42931
0.4	0.765987		0.391	1.30984		0.403986	6.4277
0.401	0.764006		0.392	1.30909		0.40461	6.42719
0.402	0.762043		0.393	1.30834		0.405234	6.42686
0.402	0.760173		0.393	1.30759		0.405858	6.42707
0.403	0.758414		0.394	1.30685		0.406482	6.42706
0.403	0.757064		0.394	1.3061		0.407106	6.42603
0.404	0.756437		0.395	1.30536		0.40773	6.42532
0.405	0.756116		0.396	1.30453		0.408354	6.42424
0.405	0.755786		0.396	1.30343		0.408978	6.42345
0.406	0.755455		0.397	1.30216		0.409603	6.42281
0.406	0.755123		0.397	1.30089		0.410227	6.4218
0.407	0.754791		0.398	1.29961		0.410851	6.42234
0.408	0.754496		0.398	1.29834		0.411475	6.42262
0.408	0.754323		0.399	1.29706		0.412099	6.42265
0.409	0.754245		0.4	1.29582		0.412723	6.42178
0.409	0.754167		0.4	1.29494		0.413347	6.42063
0.41	0.754089		0.401	1.29451		0.413971	6.42
0.411	0.754011		0.401	1.29408		0.414595	6.41898
0.411	0.753934		0.402	1.29365		0.415219	6.41798
0.412	0.753744		0.403	1.29321		0.415843	6.41718
0.412	0.753148		0.403	1.29278		0.416467	6.41617
0.413	0.752263		0.404	1.29229		0.417091	6.41597
0.414	0.751378		0.404	1.29085		0.417716	6.41562
0.414	0.750491		0.405	1.28834		0.41834	6.41473
0.415	0.749607		0.405	1.28584		0.418964	6.41387
0.415	0.748721		0.406	1.28334		0.419588	6.41345
0.416	0.74778		0.407	1.28084		0.420212	6.41334
0.417	0.746518		0.407	1.27834		0.420836	6.41378
0.417	0.74504		0.408	1.27591		0.42146	6.41396
0.418	0.743564		0.408	1.27452		0.422084	6.41339
0.418	0.74208		0.409	1.274		0.422708	6.4125
0.419	0.740595		0.41	1.27348		0.423332	6.41114
0.42	0.73911		0.41	1.27295		0.423956	6.40972
0.42	0.737617		0.411	1.27243		0.42458	6.40845
0.421	0.736348		0.411	1.27191		0.425205	6.40799
0.421	0.735219		0.412	1.27138		0.425829	6.40787
0.422	0.734108		0.413	1.27023		0.426453	6.40815
0.423	0.732997		0.413	1.2687		0.427077	6.40691
0.423	0.731885		0.414	1.2672		0.427701	6.40555
0.424	0.730771		0.414	1.26568		0.428325	6.40441
0.424	0.729665		0.415	1.26418		0.428949	6.40279
0.425	0.729268		0.415	1.26267		0.429573	6.40215
0.426	0.729136		0.416	1.26115		0.430197	6.40137
0.426	0.729015		0.417	1.25967		0.430821	6.40091
0.427	0.728895		0.417	1.25819		0.431445	6.40111
0.427	0.728774		0.418	1.25668		0.432069	6.40047
0.428	0.728654		0.418	1.25517		0.432693	6.39964
0.429	0.728602		0.419	1.25366		0.433318	6.39952
0.429	0.728939		0.42	1.25215		0.433942	6.39926
0.43	0.729347		0.42	1.25063		0.434566	6.3989
0.43	0.729754		0.421	1.24926		0.43519	6.39896
0.431	0.730163		0.421	1.24826		0.435814	6.39838
0.432	0.73057		0.422	1.24731		0.436438	6.39764
0.432	0.730979		0.422	1.24638		0.437062	6.39578
0.433	0.730596		0.423	1.24544		0.437686	6.39435
0.433	0.728644		0.424	1.24449		0.43831	6.39342
0.434	0.726185		0.424	1.24355		0.438934	6.3921
0.435	0.723738		0.425	1.24333		0.439558	6.39127
0.435	0.721285		0.425	1.2437		0.440182	6.38984
0.436	0.718831		0.426	1.24408		0.440807	6.38891
0.436	0.716382		0.427	1.24446		0.441431	6.38769
0.437	0.714315		0.427	1.24484		0.442055	6.38574
0.438	0.71305		0.428	1.24522		0.442679	6.38467
0.438	0.712081		0.428	1.24558		0.443303	6.38333
0.439	0.711115		0.429	1.2455		0.443927	6.38245
0.439	0.710147		0.43	1.24464		0.444551	6.38167
0.44	0.709182		0.43	1.24378		0.445175	6.38075
0.441	0.708213		0.431	1.24293		0.445799	6.38021
0.441	0.707464		0.431	1.24207		0.446423	6.37882
0.442	0.707469		0.432	1.24121		0.447047	6.378
0.442	0.707574		0.432	1.24039		0.447671	6.37735
0.443	0.707679		0.433	1.23995		0.448295	6.3762
0.443	0.707785		0.434	1.24037		0.44892	6.37511
0.444	0.707889		0.434	1.24079		0.449544	6.37504
0.445	0.707995		0.435	1.24122		0.450168	6.3746
0.445	0.707994		0.435	1.24164		0.450792	6.3736
0.446	0.706946		0.436	1.24206		0.451416	6.37281
0.446	0.705896		0.437	1.24244		0.45204	6.3705
0.447	0.704848		0.437	1.24215		0.452664	6.36882
0.448	0.703796		0.438	1.24041		0.453288	6.36713
0.448	0.702751		0.438	1.23867		0.453912	6.36598
0.449	0.701698		0.439	1.23694		0.454536	6.36543
0.449	0.700672		0.439	1.23524		0.45516	6.36578
0.45	0.699704		0.44	1.23363		0.455784	6.36476
0.451	0.698736		0.441	1.23209		0.456409	6.36312
0.451	0.697764		0.441	1.23069		0.457033	6.36204
0.452	0.696795		0.442	1.23052		0.457657	6.36066
0.452	0.695826		0.442	1.23036		0.458281	6.36078
0.453	0.694855		0.443	1.2302		0.458905	6.36026
0.454	0.694216		0.444	1.23004		0.459529	6.35949
0.454	0.693901		0.444	1.22987		0.460153	6.35984
0.455	0.693628		0.445	1.22971		0.460777	6.35869
0.455	0.693367		0.445	1.22943		0.461401	6.35746
0.456	0.693121		0.446	1.22887		0.462025	6.35602
0.457	0.692882		0.447	1.22824		0.462649	6.35441
0.457	0.692635		0.447	1.22761		0.463273	6.35303
0.458	0.692016		0.448	1.22698		0.463897	6.3523
0.458	0.69077		0.448	1.22636		0.464522	6.35104
0.459	0.689414		0.449	1.22575		0.465146	6.34982
0.46	0.688052		0.449	1.22531		0.46577	6.34921
0.46	0.686682		0.45	1.22503		0.466394	6.34849
0.461	0.68531		0.451	1.22476		0.467018	6.34699
0.461	0.683929		0.451	1.2245		0.467642	6.34552
0.462	0.68383		0.452	1.22424		0.468266	6.34482
0.463	0.684439		0.452	1.22398		0.46889	6.34409
0.463	0.685068		0.453	1.22371		0.469514	6.34298
0.464	0.685701		0.454	1.22303		0.470138	6.34235
0.464	0.686334		0.454	1.22199		0.470762	6.34192
0.465	0.686952		0.455	1.22091		0.471386	6.34138
0.466	0.687559		0.455	1.21983		0.47201	6.34079
0.466	0.688085		0.456	1.21876		0.472635	6.34053
0.467	0.688539		0.456	1.21769		0.473259	6.34118
0.467	0.688991		0.457	1.21661		0.473883	6.34088
0.468	0.689443		0.458	1.21596		0.474507	6.33974
0.469	0.689895		0.458	1.21618		0.475131	6.33907
0.469	0.690345		0.459	1.21648		0.475755	6.33927
0.47	0.690276		0.459	1.21679		0.476379	6.33942
0.47	0.689313		0.46	1.2171		0.477003	6.33925
0.471	0.687992		0.461	1.21741		0.477627	6.33894
0.472	0.68668		0.461	1.21772		0.478251	6.33758
0.472	0.685361		0.462	1.21793		0.478875	6.33665
0.473	0.684044		0.462	1.21775		0.479499	6.33603
0.473	0.682729		0.463	1.21754		0.480123	6.3351
0.474	0.681342		0.464	1.21734		0.480748	6.33433
0.475	0.680414		0.464	1.21714		0.481372	6.33289
0.475	0.679692		0.465	1.21693		0.481996	6.33148
0.476	0.678973		0.465	1.21673		0.48262	6.32998
0.476	0.678253		0.466	1.21661		0.483244	6.32924
0.477	0.677526		0.466	1.21701		0.483868	6.32891
0.478	0.676803		0.467	1.21742		0.484492	6.32823
0.478	0.676199		0.468	1.21782		0.485116	6.3275
0.479	0.675872		0.468	1.21822		0.48574	6.3266
0.479	0.675571		0.469	1.21863		0.486364	6.3252
0.48	0.675268		0.469	1.21901		0.486988	6.32414
0.481	0.674967		0.47	1.21904		0.487612	6.3233
0.481	0.674667		0.471	1.21835		0.488237	6.32221
0.482	0.674332		0.471	1.21764		0.488861	6.32124
0.482	0.673654		0.472	1.21693		0.489485	6.32055
0.483	0.672561		0.472	1.21623		0.490109	6.32014
0.484	0.67143		0.473	1.21552		0.490733	6.31946
0.484	0.670313		0.473	1.21482		0.491357	6.31832
0.485	0.669188		0.474	1.21399		0.491981	6.31777
0.485	0.668071		0.475	1.21301		0.492605	6.31735
0.486	0.66693		0.475	1.21209		0.493229	6.31649
0.487	0.665892		0.476	1.21117		0.493853	6.3154
0.487	0.665006		0.476	1.21025		0.494477	6.31504
0.488	0.664132		0.477	1.20932		0.495101	6.31432
0.488	0.663268		0.478	1.2084		0.495725	6.31395
0.489	0.662405		0.478	1.20724		0.49635	6.31302
0.49	0.661535		0.479	1.20567		0.496974	6.3115
0.49	0.660681		0.479	1.20394		0.497598	6.30982
0.491	0.65959		0.48	1.2022		0.498222	6.30871
0.491	0.658291		0.48	1.20047		0.498846	6.30791
0.492	0.65695		0.481	1.19874		0.49947	6.30708
0.493	0.655602		0.482	1.19701		0.500094	6.30589
0.493	0.654269		0.482	1.19567		0.500718	6.3043
0.494	0.652934		0.483	1.19485		0.501342	6.30243
0.494	0.65159		0.483	1.1942		0.501966	6.3013
0.495	0.65008		0.484	1.19355		0.50259	6.3002
0.496	0.648468		0.485	1.1929		0.503214	6.29918
0.496	0.646847		0.485	1.19225		0.503839	6.29781
0.497	0.645242		0.486	1.1916		0.504463	6.29591
0.497	0.643607		0.486	1.19032		0.505087	6.29472
0.498	0.642002		0.487	1.18816		0.505711	6.29415
0.499	0.640413		0.488	1.1858		0.506335	6.29285
0.499	0.639607		0.488	1.18345		0.506959	6.29107
0.5	0.639153		0.489	1.1811		0.507583	6.28984
0.5	0.63869		0.489	1.17874		0.508207	6.28818
0.501	0.638232		0.49	1.1764		0.508831	6.28741
0.502	0.637774		0.49	1.17428		0.509455	6.28709
0.502	0.637313		0.491	1.17271		0.510079	6.28617
0.503	0.636882		0.492	1.17121		0.510703	6.28475
0.503	0.636531		0.492	1.16967		0.511328	6.28338
0.504	0.636214		0.493	1.16816		0.511952	6.28174
0.505	0.635895		0.493	1.16673		0.512576	6.28123
0.505	0.635579		0.494	1.16539		0.5132	6.28022
0.506	0.635263		0.495	1.16402		0.513824	6.27955
0.506	0.634948		0.495	1.16243		0.514448	6.27854
0.507	0.634687		0.496	1.16068		0.515072	6.27793
0.508	0.634978		0.496	1.1589		0.515696	6.27727
0.508	0.635636		0.497	1.1571		0.51632	6.27654
0.509	0.636271		0.497	1.15529		0.516944	6.27618
0.509	0.636866		0.498	1.15349		0.517568	6.2758
0.51	0.63744		0.499	1.15176		0.518192	6.27543
0.511	0.638023		0.499	1.15077		0.518816	6.27548
0.511	0.638679		0.5	1.15008		0.519441	6.27578
0.512	0.639273		0.5	1.1494		0.520065	6.27577
0.512	0.639553		0.501	1.14872		0.520689	6.27566
0.513	0.639833		0.502	1.14804		0.521313	6.27475
0.514	0.640114		0.502	1.14736		0.521937	6.27362
0.514	0.640395		0.503	1.14668		0.522561	6.2725
0.515	0.640677		0.503	1.14662		0.523185	6.27031
0.515	0.640976		0.504	1.14679		0.523809	6.26836
0.516	0.640768		0.505	1.14696		0.524433	6.26857
0.517	0.64		0.505	1.14714		0.525057	6.26866
0.517	0.639184		0.506	1.14732		0.525681	6.26762
0.518	0.638369		0.506	1.14749		0.526305	6.2664
0.518	0.637552		0.507	1.14767		0.526929	6.26536
0.519	0.636741		0.507	1.14809		0.527554	6.26441
0.52	0.635918		0.508	1.14878		0.528178	6.26368
0.52	0.635185		0.509	1.14953		0.528802	6.26311
0.521	0.634524		0.509	1.15028		0.529426	6.26316
0.521	0.633874		0.51	1.15104		0.53005	6.26298
0.522	0.633224		0.51	1.15179		0.530674	6.26234
0.523	0.632568		0.511	1.15255		0.531298	6.26168
0.523	0.631914		0.512	1.15294		0.531922	6.26135
0.524	0.631258		0.512	1.15313		0.532546	6.26108
0.524	0.630593		0.513	1.1533		0.53317	6.2607
0.525	0.629893		0.513	1.15347		0.533794	6.25995
0.526	0.629185		0.514	1.15364		0.534418	6.25993
0.526	0.628474		0.514	1.15381		0.535043	6.26003
0.527	0.627759		0.515	1.154		0.535667	6.25962
0.527	0.627047		0.516	1.15528		0.536291	6.25829
0.528	0.626339		0.516	1.15776		0.536915	6.25735
0.529	0.62603		0.517	1.16023		0.537539	6.25711
0.529	0.625952		0.517	1.1627		0.538163	6.25616
0.53	0.625876		0.518	1.16519		0.538787	6.25509
0.53	0.625798		0.519	1.16767		0.539411	6.25449
0.531	0.62572		0.519	1.16996		0.540035	6.25359
0.532	0.625643		0.52	1.17118		0.540659	6.25257
0.532	0.625449		0.52	1.1712		0.541283	6.25156
0.533	0.624736		0.521	1.17122		0.541907	6.25078
0.533	0.623556		0.522	1.17125		0.542531	6.25027
0.534	0.622379		0.522	1.17127		0.543156	6.24955
0.535	0.621199		0.523	1.17129		0.54378	6.24888
0.535	0.620019		0.523	1.17141		0.544404	6.24824
0.536	0.618835		0.524	1.17198		0.545028	6.2475
0.536	0.617614		0.524	1.17293		0.545652	6.24698
0.537	0.616179		0.525	1.17389		0.546276	6.24633
0.538	0.614585		0.526	1.17485		0.5469	6.24577
0.538	0.612987		0.526	1.17581		0.547524	6.24549
0.539	0.61139		0.527	1.17677		0.548148	6.24477
0.539	0.609807		0.527	1.17768		0.548772	6.24411
0.54	0.608177		0.528	1.17825		0.549396	6.24327
0.541	0.606702		0.529	1.17861		0.55002	6.24197
0.541	0.605765		0.529	1.17897		0.550644	6.2404
0.542	0.604912		0.53	1.17932		0.551269	6.23902
0.542	0.60408		0.53	1.17967		0.551893	6.23782
0.543	0.603239		0.531	1.18003		0.552517	6.23727
0.544	0.602405		0.531	1.18036		0.553141	6.23761
0.544	0.601568		0.532	1.18026		0.553765	6.23779
0.545	0.600825		0.533	1.17995		0.554389	6.23824
0.545	0.600962		0.533	1.17962		0.555013	6.23781
0.546	0.601103		0.534	1.17929		0.555637	6.23632
0.547	0.601245		0.534	1.17896		0.556261	6.23581
0.547	0.601386		0.535	1.17863		0.556885	6.23543
0.548	0.601527		0.536	1.1783		0.557509	6.23517
0.548	0.601669		0.536	1.17819		0.558133	6.23506
0.549	0.601671		0.537	1.17823		0.558757	6.23459
0.55	0.601357		0.537	1.1783		0.559382	6.234
0.55	0.600962		0.538	1.17836		0.560006	6.23363
0.551	0.600567		0.538	1.17842		0.56063	6.23276
0.551	0.600171		0.539	1.17848		0.561254	6.23146
0.552	0.599777		0.54	1.17853		0.561878	6.23079
0.553	0.599382		0.54	1.1784		0.562502	6.23079
0.553	0.599056		0.541	1.17801		0.563126	6.2308
0.554	0.59875		0.541	1.17762		0.56375	6.23045
0.554	0.598426		0.542	1.17723		0.564374	6.23016
0.555	0.598102		0.543	1.17684		0.564998	6.22967
0.556	0.597779		0.543	1.17645		0.565622	6.22909
0.556	0.597452		0.544	1.17595		0.566246	6.22856
0.557	0.597129		0.544	1.17489		0.566871	6.22874
0.557	0.596692		0.545	1.17334		0.567495	6.22924
0.558	0.596408		0.546	1.17179		0.568119	6.22892
0.559	0.596144		0.546	1.17025		0.568743	6.22857
0.559	0.595878		0.547	1.16876		0.569367	6.22827
0.56	0.595612		0.547	1.16737		0.569991	6.22794
0.56	0.595348		0.548	1.16609		0.570615	6.22765
0.561	0.595122		0.548	1.16526		0.571239	6.22714
0.562	0.595137		0.549	1.16524		0.571863	6.2265
0.562	0.595142		0.55	1.16522		0.572487	6.22627
0.563	0.595147		0.55	1.16519		0.573111	6.22622
0.563	0.595151		0.551	1.16517		0.573735	6.22584
0.564	0.595155		0.551	1.16515		0.574359	6.22528
0.565	0.59516		0.552	1.16504		0.574984	6.2251
0.565	0.59516		0.553	1.16446		0.575608	6.22428
0.566	0.594944		0.553	1.16342		0.576232	6.22424
0.566	0.594118		0.554	1.16237		0.576856	6.22297
0.567	0.593289		0.554	1.16133		0.57748	6.22241
0.568	0.592459		0.555	1.16029		0.578104	6.22206
0.568	0.591626		0.555	1.15926		0.578728	6.22092
0.569	0.590794		0.556	1.1583		0.579352	6.22098
0.569	0.589966		0.557	1.1577		0.579976	6.22067
0.57	0.589225		0.557	1.15719		0.5806	6.2197
0.57	0.588552		0.558	1.15668		0.581224	6.21904
0.571	0.587882		0.558	1.15617		0.581848	6.21829
0.572	0.587216		0.559	1.15567		0.582473	6.21754
0.572	0.586561		0.56	1.15517		0.583097	6.21718
0.573	0.585907		0.56	1.15472		0.583721	6.2166
0.573	0.585317		0.561	1.15537		0.584345	6.21575
0.574	0.585228		0.561	1.15603		0.584969	6.21507
0.575	0.585245		0.562	1.15669		0.585593	6.2146
0.575	0.585261		0.563	1.15733		0.586217	6.21446
0.576	0.585278		0.563	1.15798		0.586841	6.21526
0.576	0.585294		0.564	1.15863		0.587465	6.21461
0.577	0.585311		0.564	1.15921		0.588089	6.21445
0.578	0.585332		0.565	1.1589		0.588713	6.21326
0.578	0.585395		0.565	1.1585		0.589337	6.21255
0.579	0.58553		0.566	1.1581		0.589961	6.21204
0.579	0.585666		0.567	1.15769		0.590586	6.21219
0.58	0.585802		0.567	1.15728		0.59121	6.21163
0.581	0.585938		0.568	1.15687		0.591834	6.21126
0.581	0.586075		0.568	1.15658		0.592458	6.21129
0.582	0.586098		0.569	1.15685		0.593082	6.21033
0.582	0.58589		0.57	1.15736		0.593706	6.20893
0.583	0.585616		0.57	1.15787		0.59433	6.2076
0.584	0.58534		0.571	1.15839		0.594954	6.2065
0.584	0.585063		0.571	1.1589		0.595578	6.20542
0.585	0.584787		0.572	1.15941		0.596202	6.20456
0.585	0.584508		0.572	1.15964		0.596826	6.2034
0.586	0.584021		0.573	1.15919		0.59745	6.20191
0.587	0.583088		0.574	1.15843		0.598074	6.20112
0.587	0.581988		0.574	1.15766		0.598699	6.19989
0.588	0.580896		0.575	1.15689		0.599323	6.19893
0.588	0.579792		0.575	1.15613		0.599947	6.19788
0.589	0.578698		0.576	1.15537		0.600571	6.19802
0.59	0.57761		0.577	1.15442		0.601195	6.19866
0.59	0.576585		0.577	1.15309		0.601819	6.19797
0.591	0.576075		0.578	1.15159		0.602443	6.19764
0.591	0.575567		0.578	1.15009		0.603067	6.19806
0.592	0.575059		0.579	1.14859		0.603691	6.19783
0.593	0.574558		0.58	1.14709		0.604315	6.19709
0.593	0.574061		0.58	1.14559		0.604939	6.19634
0.594	0.573583		0.581	1.14437		0.605563	6.19567
0.594	0.573324		0.581	1.144		0.606188	6.19508
0.595	0.573433		0.582	1.14382		0.606812	6.19502
0.596	0.573542		0.582	1.14363		0.607436	6.19456
0.596	0.573651		0.583	1.14346		0.60806	6.19456
0.597	0.573759		0.584	1.14328		0.608684	6.19431
0.597	0.573868		0.584	1.1431		0.609308	6.19386
0.598	0.574016		0.585	1.14286		0.609932	6.1935
0.599	0.574603		0.585	1.14228		0.610556	6.19207
0.599	0.57559		0.586	1.14167		0.61118	6.19059
0.6	0.576577		0.587	1.14107		0.611804	6.1904
0.6	0.577557		0.587	1.14047		0.612428	6.19024
0.601	0.578542		0.588	1.13987		0.613052	6.19051
0.602	0.579524		0.588	1.13925		0.613676	6.1906
0.602	0.580485		0.589	1.13853		0.614301	6.19001
0.603	0.580202		0.589	1.13682		0.614925	6.18925
0.603	0.579445		0.59	1.13509		0.615549	6.18847
0.604	0.578682		0.591	1.13336		0.616173	6.18776
0.605	0.577923		0.591	1.13163		0.616797	6.1872
0.605	0.577158		0.592	1.12991		0.617421	6.18617
0.606	0.57639		0.592	1.12817		0.618045	6.18483
0.606	0.575634		0.593	1.1266		0.618669	6.18347
0.607	0.575469		0.594	1.12544		0.619293	6.18258
0.608	0.575691		0.594	1.12424		0.619917	6.18267
0.608	0.575912		0.595	1.12305		0.620541	6.18217
0.609	0.576133		0.595	1.12185		0.621165	6.18182
0.609	0.576355		0.596	1.12065		0.62179	6.18111
0.61	0.576577		0.596	1.11944		0.622414	6.18051
0.611	0.576824		0.597	1.11814		0.623038	6.18018
0.611	0.577159		0.598	1.11667		0.623662	6.17981
0.612	0.577482		0.598	1.11514		0.624286	6.17926
0.612	0.577803		0.599	1.11361		0.62491	6.17902
0.613	0.578127		0.599	1.11209		0.625534	6.17855
0.614	0.578448		0.6	1.11061		0.626158	6.178
0.614	0.57877		0.601	1.10923		0.626782	6.17705
0.615	0.57911		0.601	1.10833		0.627406	6.17644
0.615	0.57948		0.602	1.10831		0.62803	6.17606
0.616	0.579851		0.602	1.10888		0.628654	6.17599
0.617	0.580202		0.603	1.10947		0.629278	6.17582
0.617	0.580547		0.604	1.11007		0.629903	6.17572
0.618	0.58091		0.604	1.11067		0.630527	6.17532
0.618	0.581296		0.605	1.11127		0.631151	6.17612
0.619	0.581662		0.605	1.11208		0.631775	6.1755
0.62	0.581873		0.606	1.11364		0.632399	6.17362
0.62	0.581887		0.606	1.11569		0.633023	6.17323
0.621	0.581901		0.607	1.11775		0.633647	6.17369
0.621	0.581916		0.608	1.1198		0.634271	6.17201
0.622	0.58193		0.608	1.12185		0.634895	6.17129
0.623	0.581944		0.609	1.12389		0.635519	6.17118
0.623	0.581904		0.609	1.12593		0.636143	6.17047
0.624	0.581569		0.61	1.12787		0.636767	6.16973
0.624	0.580982		0.611	1.12966		0.637392	6.16958
0.625	0.580398		0.611	1.13146		0.638016	6.16906
0.626	0.579815		0.612	1.13326		0.63864	6.16901
0.626	0.579233		0.612	1.13505		0.639264	6.16831
0.627	0.57865		0.613	1.13685		0.639888	6.16752
0.627	0.578014		0.613	1.13847		0.640512	6.16725
0.628	0.577102		0.614	1.13967		0.641136	6.16644
0.629	0.576037		0.615	1.14065		0.64176	6.16513
0.629	0.574971		0.615	1.14162		0.642384	6.16577
0.63	0.573905		0.616	1.1426		0.643008	6.16501
0.63	0.572833		0.616	1.14357		0.643632	6.1643
0.631	0.571763		0.617	1.14455		0.644256	6.16401
0.632	0.570693		0.618	1.14516		0.64488	6.16336
0.632	0.570656		0.618	1.14507		0.645505	6.16282
0.633	0.570954		0.619	1.1447		0.646129	6.16266
0.633	0.571255		0.619	1.14432		0.646753	6.16285
0.634	0.571556		0.62	1.14394		0.647377	6.16247
0.635	0.571859		0.621	1.14356		0.648001	6.16251
0.635	0.572162		0.621	1.14319		0.648625	6.16255
0.636	0.572464		0.622	1.143		0.649249	6.16303
0.636	0.571894		0.622	1.14399		0.649873	6.16293
0.637	0.570683		0.623	1.14542		0.650497	6.16315
0.638	0.569483		0.623	1.14687		0.651121	6.16307
0.638	0.568279		0.624	1.14833		0.651745	6.16325
0.639	0.56707		0.625	1.14979		0.652369	6.16187
0.639	0.565859		0.625	1.15125		0.652993	6.16019
0.64	0.564842		0.626	1.15269		0.653618	6.15916
0.641	0.564654		0.626	1.15261		0.654242	6.15833
0.641	0.565043		0.627	1.15231		0.654866	6.15793
0.642	0.565432		0.628	1.15201		0.65549	6.15782
0.642	0.565821		0.628	1.1517		0.656114	6.15762
0.643	0.566209		0.629	1.1514		0.656738	6.15698
0.644	0.5666		0.629	1.1511		0.657362	6.15654
0.644	0.566773		0.63	1.15064		0.657986	6.15645
0.645	0.566423		0.63	1.14939		0.65861	6.15588
0.645	0.565811		0.631	1.14782		0.659234	6.15637
0.646	0.565199		0.632	1.14626		0.659858	6.15577
0.647	0.564596		0.632	1.14469		0.660482	6.15461
0.647	0.563988		0.633	1.14312		0.661106	6.15382
0.648	0.563376		0.633	1.14155		0.661731	6.15258
0.648	0.563063		0.634	1.14043		0.662355	6.15142
0.649	0.563449		0.635	1.14014		0.662979	6.15149
0.65	0.563996		0.635	1.13992		0.663603	6.1516
0.65	0.56454		0.636	1.1397		0.664227	6.15117
0.651	0.56508		0.636	1.13949		0.664851	6.15053
0.651	0.565626		0.637	1.13927		0.665475	6.15101
0.652	0.566164		0.638	1.13905		0.666099	6.15083
0.653	0.566675		0.638	1.13853		0.666723	6.15136
0.653	0.565964		0.639	1.13744		0.667347	6.15151
0.654	0.565257		0.639	1.13612		0.667971	6.1514
0.654	0.564546		0.64	1.13479		0.668595	6.15086
0.655	0.563836		0.64	1.13347		0.669219	6.15008
0.656	0.563122		0.641	1.13214		0.669844	6.14899
0.656	0.56241		0.642	1.13082		0.670468	6.14816
0.657	0.561639		0.642	1.12952		0.671092	6.14703
0.657	0.560695		0.643	1.12856		0.671716	6.14578
0.658	0.559757		0.643	1.12771		0.67234	6.14523
0.659	0.558824		0.644	1.12685		0.672964	6.14566
0.659	0.557888		0.645	1.126		0.673588	6.14528
0.66	0.556954		0.645	1.12514		0.674212	6.14511
0.66	0.55602		0.646	1.12428		0.674836	6.14532
0.661	0.55514		0.646	1.12437		0.67546	6.14479
0.662	0.554338		0.647	1.12567		0.676084	6.14431
0.662	0.55355		0.647	1.12697		0.676708	6.14409
0.663	0.552757		0.648	1.12828		0.677333	6.14372
0.663	0.551968		0.649	1.12958		0.677957	6.14414
0.664	0.551176		0.649	1.13088		0.678581	6.14395
0.665	0.550384		0.65	1.13217		0.679205	6.14349
0.665	0.549767		0.65	1.13323		0.679829	6.14307
0.666	0.54932		0.651	1.13365		0.680453	6.14205
0.666	0.548901		0.652	1.13407		0.681077	6.142
0.667	0.548483		0.652	1.1345		0.681701	6.14129
0.668	0.548066		0.653	1.13492		0.682325	6.14093
0.668	0.547648		0.653	1.13533		0.682949	6.13953
0.669	0.547229		0.654	1.13543		0.683573	6.13993
0.669	0.546775		0.655	1.13493		0.684197	6.14098
0.67	0.546794		0.655	1.13444		0.684821	6.14226
0.671	0.546813		0.656	1.13391		0.685446	6.14208
0.671	0.546833		0.656	1.13335		0.68607	6.14184
0.672	0.546854		0.657	1.13278		0.686694	6.14175
0.672	0.546876		0.657	1.13221		0.687318	6.14146
0.673	0.546899		0.658	1.13185		0.687942	6.14126
0.674	0.546995		0.659	1.13284		0.688566	6.14161
0.674	0.546555		0.659	1.13531		0.68919	6.14133
0.675	0.546113		0.66	1.13783		0.689814	6.14234
0.675	0.545674		0.66	1.14036		0.690438	6.14139
0.676	0.545233		0.661	1.1429		0.691062	6.14086
0.677	0.544793		0.662	1.14541		0.691686	6.14078
0.677	0.54428		0.662	1.14778		0.69231	6.14076
0.678	0.543732		0.663	1.1473		0.692935	6.14147
0.678	0.543225		0.663	1.14594		0.693559	6.14165
0.679	0.54272		0.664	1.14453		0.694183	6.14086
0.68	0.542222		0.664	1.14314		0.694807	6.14082
0.68	0.541723		0.665	1.14176		0.695431	6.13991
0.681	0.541227		0.666	1.14039		0.696055	6.1396
0.681	0.540733		0.666	1.13895		0.696679	6.13859
0.682	0.542078		0.667	1.13691		0.697303	6.13814
0.683	0.543683		0.667	1.13483		0.697927	6.13563
0.683	0.545278		0.668	1.13277		0.698551	6.1354
0.684	0.546864		0.669	1.13071		0.699175	6.13531
0.684	0.548458		0.669	1.12866		0.699799	6.13497
0.685	0.55005		0.67	1.12658		0.700423	6.13449
0.686	0.551587		0.67	1.12458		0.701048	6.13384
0.686	0.551884		0.671	1.12283		0.701672	6.13348
0.687	0.551735		0.671	1.12122		0.702296	6.13446
0.687	0.551583		0.672	1.11959		0.70292	6.13486
0.688	0.551434		0.673	1.11796		0.703544	6.13522
0.689	0.551284		0.673	1.11632		0.704168	6.1351
0.689	0.551132		0.674	1.11468		0.704792	6.13523
0.69	0.551021		0.674	1.1131		0.705416	6.13507
0.69	0.551103		0.675	1.11153		0.70604	6.13449
0.691	0.551335		0.676	1.10988		0.706664	6.13331
0.692	0.55157		0.676	1.10823		0.707288	6.13286
0.692	0.551803		0.677	1.10657		0.707912	6.13122
0.693	0.552037		0.677	1.10491		0.708537	6.13136
0.693	0.552271		0.678	1.10326		0.709161	6.12899
0.694	0.552573		0.679	1.10174		0.709785	6.12818
0.695	0.553012		0.679	1.10025		0.710409	6.1277
0.695	0.553505		0.68	1.09871		0.711033	6.12724
0.696	0.554003		0.68	1.09718		0.711657	6.12671
0.696	0.554497		0.681	1.09565		0.712281	6.12601
0.697	0.554992		0.681	1.09411		0.712905	6.12517
0.697	0.555487		0.682	1.09258		0.713529	6.12448
0.698	0.555793		0.683	1.09155		0.714153	6.12432
0.699	0.555377		0.683	1.09115		0.714777	6.124
0.699	0.554766		0.684	1.09085		0.715401	6.12328
0.7	0.554142		0.684	1.09054		0.716025	6.12199
0.7	0.553547		0.685	1.09023		0.71665	6.12117
0.701	0.552937		0.686	1.08992		0.717274	6.11986
0.702	0.552318		0.686	1.08958		0.717898	6.11906
0.702	0.551895		0.687	1.08818		0.718522	6.11848
0.703	0.552171		0.687	1.08501		0.719146	6.11801
0.703	0.552447		0.688	1.08183		0.71977	6.11747
0.704	0.552724		0.688	1.07867		0.720394	6.1172
0.705	0.553002		0.689	1.07547		0.721018	6.11707
0.705	0.553278		0.69	1.0723		0.721642	6.11627
0.706	0.553547		0.69	1.06918		0.722266	6.11662
0.706	0.553291		0.691	1.06667		0.72289	6.11671
0.707	0.551599		0.691	1.06571		0.723514	6.11604
0.708	0.549777		0.692	1.06475		0.724138	6.11489
0.708	0.547955		0.693	1.06379		0.724763	6.11392
0.709	0.546138		0.693	1.06283		0.725387	6.11358
0.709	0.544309		0.694	1.06187		0.726011	6.11274
0.71	0.542494		0.694	1.06089		0.726635	6.11234
0.711	0.540636		0.695	1.05987		0.727259	6.1111
0.711	0.538982		0.696	1.05877		0.727883	6.11004
0.712	0.537574		0.696	1.05766		0.728507	6.10958
0.712	0.536162		0.697	1.05654		0.729131	6.10999
0.713	0.534754		0.697	1.05542		0.729755	6.10937
0.714	0.533346		0.698	1.0543		0.730379	6.10922
0.714	0.531929		0.698	1.05319		0.731003	6.1095
0.715	0.531217		0.699	1.05235		0.731627	6.10937
0.715	0.531097		0.7	1.05171		0.732252	6.10961
0.716	0.531081		0.7	1.05108		0.732876	6.10999
0.717	0.531065		0.701	1.05045		0.7335	6.10933
0.717	0.531049		0.701	1.04983		0.734124	6.10822
0.718	0.531033		0.702	1.04921		0.734748	6.10737
0.718	0.531017		0.703	1.04858		0.735372	6.1065
0.719	0.53076		0.703	1.04807		0.735996	6.10491
0.72	0.530465		0.704	1.04774		0.73662	6.10445
0.72	0.530169		0.704	1.04744		0.737244	6.10389
0.721	0.529873		0.705	1.04714		0.737868	6.1041
0.721	0.529579		0.705	1.04684		0.738492	6.104
0.722	0.529287		0.706	1.04655		0.739116	6.10494
0.723	0.529007		0.707	1.04624		0.73974	6.10433
0.723	0.528803		0.707	1.04475		0.740365	6.10425
0.724	0.528765		0.708	1.04301		0.740989	6.10426
0.724	0.528725		0.708	1.04124		0.741613	6.10403
0.725	0.528683		0.709	1.03939		0.742237	6.1037
0.726	0.528639		0.71	1.03743		0.742861	6.1038
0.726	0.528595		0.71	1.03543		0.743485	6.10375
0.727	0.52855		0.711	1.03342		0.744109	6.10396
0.727	0.528336		0.711	1.03208		0.744733	6.10354
0.728	0.527929		0.712	1.03186		0.745357	6.10249
0.729	0.527506		0.713	1.03192		0.745981	6.10217
0.729	0.527085		0.713	1.03198		0.746605	6.10189
0.73	0.526665		0.714	1.03205		0.747229	6.10219
0.73	0.526246		0.714	1.03211		0.747854	6.10199
0.731	0.525857		0.715	1.03217		0.748478	6.10165
0.732	0.525803		0.715	1.03244		0.749102	6.10154
0.732	0.526558		0.716	1.03307		0.749726	6.10163
0.733	0.527313		0.717	1.03374		0.75035	6.10149
0.733	0.528063		0.717	1.0344		0.750974	6.10165
0.734	0.528817		0.718	1.03506		0.751598	6.1018
0.735	0.529568		0.718	1.03573		0.752222	6.10042
0.735	0.530309		0.719	1.03639		0.752846	6.10002
0.736	0.531216		0.72	1.03694		0.75347	6.09996
0.736	0.533013		0.72	1.03685		0.754094	6.09941
0.737	0.534945		0.721	1.03676		0.754718	6.09852
0.738	0.536883		0.721	1.03667		0.755342	6.09877
0.738	0.538821		0.722	1.03658		0.755967	6.09899
0.739	0.540767		0.722	1.03649		0.756591	6.09897
0.739	0.542709		0.723	1.03642		0.757215	6.09812
0.74	0.544297		0.724	1.03669		0.757839	6.09837
0.741	0.544852		0.724	1.03824		0.758463	6.09835
0.741	0.545036		0.725	1.03989		0.759087	6.09821
0.742	0.54522		0.725	1.04153		0.759711	6.09867
0.742	0.545405		0.726	1.04316		0.760335	6.0978
0.743	0.54559		0.727	1.04481		0.760959	6.0977
0.744	0.545775		0.727	1.04641		0.761583	6.09798
0.744	0.545929		0.728	1.04764		0.762207	6.09726
0.745	0.54607		0.728	1.04835		0.762831	6.09721
0.745	0.546226		0.729	1.04904		0.763456	6.09619
0.746	0.546384		0.729	1.04973		0.76408	6.09631
0.747	0.546541		0.73	1.05041		0.764704	6.09527
0.747	0.546697		0.731	1.0511		0.765328	6.09509
0.748	0.546853		0.731	1.05174		0.765952	6.0955
0.748	0.546741		0.732	1.05192		0.766576	6.09611
0.749	0.54627		0.732	1.05161		0.7672	6.09724
0.75	0.545731		0.733	1.05119		0.767824	6.09623
0.75	0.545189		0.734	1.05078		0.768448	6.09542
0.751	0.544653		0.734	1.05037		0.769072	6.0949
0.751	0.544113		0.735	1.04996		0.769696	6.09457
0.752	0.543579		0.735	1.04956		0.77032	6.0934
0.753	0.543235		0.736	1.05002		0.770944	6.09343
0.753	0.54288		0.737	1.05104		0.771569	6.09242
0.754	0.542525		0.737	1.05213		0.772193	6.09138
0.754	0.542169		0.738	1.05323		0.772817	6.09065
0.755	0.541815		0.738	1.05433		0.773441	6.09173
0.756	0.541462		0.739	1.05542		0.774065	6.09126
0.756	0.54109		0.739	1.05662		0.774689	6.09125
0.757	0.540661		0.74	1.05823		0.775313	6.09091
0.757	0.54019		0.741	1.05906		0.775937	6.09148
0.758	0.53972		0.741	1.05989		0.776561	6.09171
0.759	0.53925		0.742	1.06073		0.777185	6.09096
0.759	0.538782		0.742	1.06157		0.777809	6.09087
0.76	0.538313		0.743	1.0624		0.778433	6.0911
0.76	0.537829		0.744	1.06305		0.779057	6.09062
0.761	0.537109		0.744	1.06282		0.779682	6.09077
0.762	0.536198		0.745	1.06253		0.780306	6.09113
0.762	0.535284		0.745	1.06225		0.78093	6.09076
0.763	0.534376		0.746	1.06197		0.781554	6.091
0.763	0.533466		0.746	1.06168		0.782178	6.09017
0.764	0.532553		0.747	1.0614		0.782802	6.08977
0.765	0.531822		0.748	1.06116		0.783426	6.08975
0.765	0.531715		0.748	1.06105		0.78405	6.09029
0.766	0.53178		0.749	1.06106		0.784674	6.08888
0.766	0.531845		0.749	1.06106		0.785298	6.0885
0.767	0.53191		0.75	1.06107		0.785922	6.08844
0.768	0.531975		0.751	1.06107		0.786546	6.08772
0.768	0.53204		0.751	1.06108		0.78717	6.0864
0.769	0.53226		0.752	1.06115		0.787795	6.08571
0.769	0.533173		0.752	1.06101		0.788419	6.0854
0.77	0.534138		0.753	1.06075		0.789043	6.08464
0.771	0.535106		0.754	1.06049		0.789667	6.08481
0.771	0.536065		0.754	1.06023		0.790291	6.08545
0.772	0.537033		0.755	1.05997		0.790915	6.08617
0.772	0.537985		0.755	1.05971		0.791539	6.08609
0.773	0.538761		0.756	1.0594		0.792163	6.08628
0.774	0.539219		0.756	1.05932		0.792787	6.08543
0.774	0.539714		0.757	1.05926		0.793411	6.08446
0.775	0.54021		0.758	1.05921		0.794035	6.08375
0.775	0.540703		0.758	1.05916		0.794659	6.08406
0.776	0.541182		0.759	1.0591		0.795283	6.0843
0.777	0.541633		0.759	1.05904		0.795908	6.08472
0.777	0.542093		0.76	1.05882		0.796532	6.08532
0.778	0.542644		0.761	1.05865		0.797156	6.08431
0.778	0.543323		0.761	1.05848		0.79778	6.08334
0.779	0.544039		0.762	1.05832		0.798404	6.08255
0.78	0.544768		0.762	1.05814		0.799028	6.08278
0.78	0.545498		0.763	1.05796		0.799652	6.08322
0.781	0.546232		0.763	1.05777		0.800276	6.08291
0.781	0.546579		0.764	1.05773		0.8009	6.08284
0.782	0.546292		0.765	1.05768		0.801524	6.08292
0.783	0.545853		0.765	1.05763		0.802148	6.08265
0.783	0.545411		0.766	1.05758		0.802772	6.08384
0.784	0.544971		0.766	1.05753		0.803397	6.08418
0.784	0.544536		0.767	1.05748		0.804021	6.08423
0.785	0.544101		0.768	1.05743		0.804645	6.0831
0.786	0.543932		0.768	1.05701		0.805269	6.08267
0.786	0.543921		0.769	1.05614		0.805893	6.0824
0.787	0.54391		0.769	1.05528		0.806517	6.08236
0.787	0.5439		0.77	1.05442		0.807141	6.08121
0.788	0.543889		0.771	1.05357		0.807765	6.0811
0.789	0.543879		0.771	1.05273		0.808389	6.08157
0.789	0.543773		0.772	1.05188		0.809013	6.08049
0.79	0.543277		0.772	1.05182		0.809637	6.07966
0.79	0.54252		0.773	1.05199		0.810261	6.08051
0.791	0.541767		0.773	1.05215		0.810885	6.08113
0.792	0.541015		0.774	1.05231		0.81151	6.0803
0.792	0.540266		0.775	1.05248		0.812134	6.08019
0.793	0.539518		0.775	1.05264		0.812758	6.07898
0.793	0.538593		0.776	1.05278		0.813382	6.07897
0.794	0.53717		0.776	1.05285		0.814006	6.07846
0.795	0.535422		0.777	1.05291		0.81463	6.07803
0.795	0.53367		0.778	1.05296		0.815254	6.07828
0.796	0.531921		0.778	1.05302		0.815878	6.07902
0.796	0.530164		0.779	1.05308		0.816502	6.07906
0.797	0.528407		0.779	1.05314		0.817126	6.07834
0.798	0.526511		0.78	1.05333		0.81775	6.07854
0.798	0.52425		0.78	1.05427		0.818374	6.07885
0.799	0.521839		0.781	1.05514		0.818999	6.07904
0.799	0.519424		0.782	1.05603		0.819623	6.0788
0.8	0.516988		0.782	1.05691		0.820247	6.07759
0.801	0.514558		0.783	1.05779		0.820871	6.07687
0.801	0.512123		0.783	1.05867		0.821495	6.07664
0.802	0.510019		0.784	1.05931		0.822119	6.07505
0.802	0.509154		0.785	1.05911		0.822743	6.0746
0.803	0.508538		0.785	1.05903		0.823367	6.07377
0.804	0.507922		0.786	1.05895		0.823991	6.074
0.804	0.507309		0.786	1.05887		0.824615	6.0743
0.805	0.50669		0.787	1.05879		0.825239	6.07461
0.805	0.50606		0.787	1.05871		0.825863	6.07322
0.806	0.50442		0.788	1.05858		0.826487	6.07258
0.807	0.499817		0.789	1.05843		0.827112	6.07195
0.807	0.495166		0.789	1.05833		0.827736	6.07107
0.808	0.490515		0.79	1.05822		0.82836	6.07184
0.808	0.48588		0.79	1.05812		0.828984	6.07125
0.809	0.481301		0.791	1.05801		0.829608	6.07033
0.81	0.476707		0.792	1.05791		0.830232	6.06994
0.81	0.473114		0.792	1.05796		0.830856	6.06961
0.811	0.471539		0.793	1.05809		0.83148	6.06996
0.811	0.470044		0.793	1.05822		0.832104	6.06993
0.812	0.468561		0.794	1.05836		0.832728	6.06891
0.813	0.467081		0.795	1.05849		0.833352	6.06884
0.813	0.465594		0.795	1.05862		0.833976	6.06774
0.814	0.464122		0.796	1.05875		0.834601	6.06807
0.814	0.462726		0.796	1.05866		0.835225	6.068
0.815	0.461341		0.797	1.0583		0.835849	6.06706
0.816	0.459927		0.797	1.0579		0.836473	6.0664
0.816	0.458506		0.798	1.0575		0.837097	6.0659
0.817	0.457076		0.799	1.05709		0.837721	6.06587
0.817	0.455647		0.799	1.05669		0.838345	6.06606
0.818	0.454291		0.8	1.05629		0.838969	6.06573
0.819	0.453852		0.8	1.05668		0.839593	6.06483
0.819	0.453941		0.801	1.05783		0.840217	6.06468
0.82	0.45408		0.802	1.05899		0.840841	6.06512
0.82	0.454218		0.802	1.06015		0.841465	6.06397
0.821	0.454358		0.803	1.06131		0.842089	6.06278
0.822	0.454497		0.803	1.06247		0.842714	6.06285
0.822	0.454588		0.804	1.06352		0.843338	6.06229
0.823	0.454455		0.804	1.06398		0.843962	6.06206
0.823	0.45454		0.805	1.06401		0.844586	6.06185
0.824	0.454639		0.806	1.06403		0.84521	6.0614
0.824	0.454738		0.806	1.06406		0.845834	6.06111
0.825	0.454837		0.807	1.06408		0.846458	6.06034
0.826	0.454936		0.807	1.06411		0.847082	6.05912
0.826	0.454798		0.808	1.06415		0.847706	6.05782
0.827	0.452905		0.809	1.0639		0.84833	6.05795
0.827	0.450977		0.809	1.06318		0.848954	6.05796
0.828	0.449047		0.81	1.06245		0.849578	6.05811
0.829	0.447107		0.81	1.06173		0.850203	6.05776
0.829	0.445217		0.811	1.06101		0.850827	6.058
0.83	0.443424		0.812	1.06029		0.851451	6.0592
0.83	0.441778		0.812	1.05949		0.852075	6.05969
0.831	0.440623		0.813	1.05921		0.852699	6.05907
0.832	0.439012		0.813	1.05937		0.853323	6.05886
0.832	0.437301		0.814	1.05953		0.853947	6.0591
0.833	0.435565		0.814	1.05967		0.854571	6.05909
0.833	0.433829		0.815	1.05982		0.855195	6.05864
0.834	0.432088		0.816	1.05996		0.855819	6.05825
0.835	0.430302		0.816	1.06012		0.856443	6.0578
0.835	0.427705		0.817	1.06047		0.857067	6.05803
0.836	0.427452		0.817	1.06123		0.857691	6.05738
0.836	0.427198		0.818	1.06206		0.858316	6.0564
0.837	0.426947		0.819	1.0629		0.85894	6.05628
0.838	0.426695		0.819	1.06374		0.859564	6.05584
0.838	0.426444		0.82	1.06457		0.860188	6.05527
0.839	0.426678		0.82	1.0654		0.860812	6.05473
0.839	0.428793		0.821	1.06575		0.861436	6.05448
0.84	0.430125		0.821	1.06537		0.86206	6.05401
0.841	0.431461		0.822	1.06486		0.862684	6.05368
0.841	0.432805		0.823	1.06436		0.863308	6.05386
0.842	0.434139		0.823	1.06385		0.863932	6.05436
0.842	0.435477		0.824	1.06335		0.864556	6.05378
0.843	0.436792		0.824	1.06285		0.86518	6.05308
0.844	0.437891		0.825	1.06233		0.865804	6.05275
0.844	0.438619		0.826	1.06178		0.866429	6.05227
0.845	0.43935		0.826	1.06123		0.867053	6.05178
0.845	0.440081		0.827	1.06068		0.867677	6.0516
0.846	0.440813		0.827	1.06012		0.868301	6.05144
0.847	0.441547		0.828	1.05957		0.868925	6.05112
0.847	0.442244		0.829	1.05901		0.869549	6.05079
0.848	0.442529		0.829	1.05818		0.870173	6.05042
0.848	0.442321		0.83	1.05699		0.870797	6.0497
0.849	0.442113		0.83	1.0557		0.871421	6.04908
0.85	0.441905		0.831	1.05442		0.872045	6.04752
0.85	0.441696		0.831	1.05312		0.872669	6.04752
0.851	0.441488		0.832	1.05182		0.873293	6.04778
0.851	0.441333		0.833	1.05053		0.873918	6.04756
0.852	0.441728		0.833	1.04964		0.874542	6.04727
0.853	0.442403		0.834	1.04927		0.875166	6.04695
0.853	0.443082		0.834	1.049		0.87579	6.04684
0.854	0.443758		0.835	1.04874		0.876414	6.04693
0.854	0.44443		0.836	1.04848		0.877038	6.04674
0.855	0.445111		0.836	1.04821		0.877662	6.04655
0.856	0.445756		0.837	1.04794		0.878286	6.04694
0.856	0.448025		0.837	1.04729		0.87891	6.04731
0.857	0.450693		0.838	1.04581		0.879534	6.04664
0.857	0.453368		0.838	1.04429		0.880158	6.04663
0.858	0.456067		0.839	1.04279		0.880782	6.04638
0.859	0.458733		0.84	1.04129		0.881406	6.04667
0.859	0.461424		0.84	1.03978		0.882031	6.04631
0.86	0.464125		0.841	1.0383		0.882655	6.04544
0.86	0.466796		0.841	1.03706		0.883279	6.04588
0.861	0.469091		0.842	1.03627		0.883903	6.04547
0.862	0.471381		0.843	1.03548		0.884527	6.04432
0.862	0.473662		0.843	1.03468		0.885151	6.04394
0.863	0.475957		0.844	1.03389		0.885775	6.04383
0.863	0.478239		0.844	1.0331		0.886399	6.04338
0.864	0.481413		0.845	1.03228		0.887023	6.04258
0.865	0.48624		0.846	1.03108		0.887647	6.04166
0.865	0.491506		0.846	1.0293		0.888271	6.0405
0.866	0.496764		0.847	1.02752		0.888895	6.04034
0.866	0.502015		0.847	1.02575		0.889519	6.04057
0.867	0.507236		0.848	1.02397		0.890144	6.04028
0.868	0.512464		0.848	1.02218		0.890768	6.04055
0.868	0.51534		0.849	1.0204		0.891392	6.04107
0.869	0.516058		0.85	1.01829		0.892016	6.04107
0.869	0.516366		0.85	1.01574		0.89264	6.0409
0.87	0.516673		0.851	1.01311		0.893264	6.04083
0.871	0.51698		0.851	1.01047		0.893888	6.04038
0.871	0.517287		0.852	1.00781		0.894512	6.03963
0.872	0.517594		0.853	1.00516		0.895136	6.03908
0.872	0.518651		0.853	1.00252		0.89576	6.03915
0.873	0.520015		0.854	0.999784		0.896384	6.03913
0.874	0.521394		0.854	0.996846		0.897008	6.03863
0.874	0.52278		0.855	0.993852		0.897633	6.03821
0.875	0.52416		0.855	0.99086		0.898257	6.0384
0.875	0.525538		0.856	0.987869		0.898881	6.03861
0.876	0.526887		0.857	0.984874		0.899505	6.03888
0.877	0.527542		0.857	0.981874		0.900129	6.03971
0.877	0.528071		0.858	0.979459		0.900753	6.04088
0.878	0.528601		0.858	0.978706		0.901377	6.04247
0.878	0.529128		0.859	0.978088		0.902001	6.04439
0.879	0.529658		0.86	0.977466		0.902625	6.04628
0.88	0.530184		0.86	0.976844		0.903249	6.04782
0.88	0.530861		0.861	0.976223		0.903873	6.04845
0.881	0.531851		0.861	0.975569		0.904497	6.04791
0.881	0.532678		0.862	0.974406		0.905121	6.04741
0.882	0.533504		0.862	0.971786		0.905746	6.0477
0.883	0.534319		0.863	0.96915		0.90637	6.04803
0.883	0.535095		0.864	0.966525		0.906994	6.04854
0.884	0.535829		0.864	0.963906		0.907618	6.04883
0.884	0.536597		0.865	0.961292		0.908242	6.04872
0.885	0.537618		0.865	0.958748		0.908866	6.04872
0.886	0.538986		0.866	0.956798		0.90949	6.04862
0.886	0.540394		0.867	0.955742		0.910114	6.04801
0.887	0.541807		0.867	0.954712		0.910738	6.04746
0.887	0.543227		0.868	0.953744		0.911362	6.04747
0.888	0.544654		0.868	0.952821		0.911986	6.04756
0.889	0.545668		0.869	0.951885		0.91261	6.04725
0.889	0.545573		0.87	0.950869		0.913234	6.04609
0.89	0.544991		0.87	0.949564		0.913859	6.04534
0.89	0.544408		0.871	0.945778		0.914483	6.04425
0.891	0.54383		0.871	0.941989		0.915107	6.04385
0.892	0.543255		0.872	0.938172		0.915731	6.04449
0.892	0.542686		0.872	0.934338		0.916355	6.0449
0.893	0.542701		0.873	0.930503		0.916979	6.04454
0.893	0.542671		0.874	0.926705		0.917603	6.04378
0.894	0.542641		0.874	0.924506		0.918227	6.04402
0.895	0.542612		0.875	0.923953		0.918851	6.04463
0.895	0.542582		0.875	0.923513		0.919475	6.04528
0.896	0.542553		0.876	0.923077		0.920099	6.04566
0.896	0.542394		0.877	0.92264		0.920723	6.04612
0.897	0.542007		0.877	0.922208		0.921347	6.04633
0.898	0.54198		0.878	0.921782		0.921972	6.04594
0.898	0.541953		0.878	0.92346		0.922596	6.04575
0.899	0.541925		0.879	0.926053		0.92322	6.04646
0.899	0.541898		0.879	0.928736		0.923844	6.04696
0.9	0.541871		0.88	0.931412		0.924468	6.04717
0.901	0.542185		0.881	0.934063		0.925092	6.04758
0.901	0.543063		0.881	0.936696		0.925716	6.04778
0.902	0.543984		0.882	0.939323		0.92634	6.04788
0.902	0.544905		0.882	0.941497		0.926964	6.048
0.903	0.545829		0.883	0.943637		0.927588	6.04864
0.904	0.546752		0.884	0.945779		0.928212	6.04915
0.904	0.547672		0.884	0.947925		0.928836	6.04952
0.905	0.548449		0.885	0.950061		0.929461	6.04935
0.905	0.549301		0.885	0.952209		0.930085	6.04851
0.906	0.550279		0.886	0.954341		0.930709	6.04725
0.907	0.551254		0.887	0.956051		0.931333	6.04584
0.907	0.55223		0.887	0.956298		0.931957	6.04363
0.908	0.553211		0.888	0.956543		0.932581	6.04177
0.908	0.55419		0.888	0.956789		0.933205	6.03986
0.909	0.554563		0.889	0.957035		0.933829	6.03804
0.91	0.553385		0.889	0.95728		0.934453	6.03639
0.91	0.551884		0.89	0.95755		0.935077	6.0357
0.911	0.550361		0.891	0.958284		0.935701	6.03493
0.911	0.548857		0.891	0.96002		0.936325	6.03466
0.912	0.547357		0.892	0.961767		0.936949	6.03422
0.913	0.54586		0.892	0.963505		0.937574	6.03399
0.913	0.544774		0.893	0.965252		0.938198	6.03316
0.914	0.544301		0.894	0.96698		0.938822	6.03293
0.914	0.543816		0.894	0.968983		0.939446	6.03366
0.915	0.543331		0.895	0.971353		0.94007	6.03327
0.916	0.542852		0.895	0.973695		0.940694	6.03216
0.916	0.542357		0.896	0.976033		0.941318	6.03204
0.917	0.541877		0.896	0.978392		0.941942	6.03186
0.917	0.541615		0.897	0.980749		0.942566	6.03123
0.918	0.541974		0.898	0.983104		0.94319	6.0304
0.919	0.54247		0.898	0.98514		0.943814	6.02954
0.919	0.542962		0.899	0.988187		0.944438	6.03019
0.92	0.543457		0.899	0.991862		0.945063	6.03087
0.92	0.543945		0.9	0.995556		0.945687	6.03076
0.921	0.544423		0.901	0.99921		0.946311	6.03046
0.922	0.544561		0.901	1.00291		0.946935	6.02976
0.922	0.544076		0.902	1.00661		0.947559	6.02888
0.923	0.543446		0.902	1.01025		0.948183	6.02853
0.923	0.542815		0.903	1.0122		0.948807	6.02936
0.924	0.542181		0.904	1.01348		0.949431	6.03026
0.925	0.541551		0.904	1.0147		0.950055	6.03055
0.925	0.54092		0.905	1.01595		0.950679	6.03077
0.926	0.540588		0.905	1.01718		0.951303	6.03075
0.926	0.540706		0.906	1.01842		0.951927	6.03083
0.927	0.540969		0.906	1.01948		0.952551	6.03053
0.928	0.541233		0.907	1.01883		0.953176	6.02999
0.928	0.541497		0.908	1.01768		0.9538	6.02936
0.929	0.541762		0.908	1.01647		0.954424	6.0291
0.929	0.542027		0.909	1.01528		0.955048	6.02859
0.93	0.541933		0.909	1.01409		0.955672	6.02783
0.931	0.541061		0.91	1.01287		0.956296	6.02887
0.931	0.540019		0.911	1.01115		0.95692	6.0327
0.932	0.538978		0.911	1.00856		0.957544	6.03764
0.932	0.537928		0.912	1.00633		0.958168	6.04249
0.933	0.536887		0.912	1.00406		0.958792	6.0459
0.934	0.535845		0.913	1.00183		0.959416	6.04674
0.934	0.535246		0.913	0.999584		0.96004	6.04645
0.935	0.535124		0.914	0.997504		0.960665	6.04621
0.935	0.535		0.915	0.996601		0.961289	6.0464
0.936	0.534879		0.915	0.997314		0.961913	6.04631
0.937	0.534762		0.916	0.997662		0.962537	6.04648
0.937	0.534653		0.916	0.998009		0.963161	6.04759
0.938	0.534547		0.917	0.998354		0.963785	6.04827
0.938	0.535007		0.918	0.998699		0.964409	6.04827
0.939	0.536446		0.918	0.99905		0.965033	6.04856
0.94	0.53813		0.919	0.999585		0.965657	6.04878
0.94	0.53983		0.919	1.00054		0.966281	6.04906
0.941	0.541531		0.92	1.00171		0.966905	6.04928
0.941	0.543233		0.92	1.00285		0.967529	6.04937
0.942	0.54494		0.921	1.00392		0.968153	6.04905
0.943	0.546456		0.922	1.00495		0.968778	6.04923
0.943	0.547482		0.922	1.00596		0.969402	6.04899
0.944	0.548504		0.923	1.00697		0.970026	6.04928
0.944	0.549522		0.923	1.00723		0.97065	6.04937
0.945	0.550534		0.924	1.00686		0.971274	6.04908
0.946	0.551547		0.925	1.00648		0.971898	6.04967
0.946	0.552552		0.925	1.00612		0.972522	6.05034
0.947	0.553594		0.926	1.00574		0.973146	6.05085
0.947	0.554697		0.926	1.00538		0.97377	6.05098
0.948	0.555793		0.927	1.00529		0.974394	6.05099
0.949	0.556893		0.928	1.00631		0.975018	6.05131
0.949	0.557993		0.928	1.00774		0.975642	6.05132
0.95	0.559091		0.929	1.00917		0.976267	6.0513
0.95	0.560172		0.929	1.01061		0.976891	6.05154
0.951	0.561148		0.93	1.01203		0.977515	6.051
0.951	0.562087		0.93	1.01345		0.978139	6.05095
0.952	0.563019		0.931	1.01491		0.978763	6.05099
0.953	0.563959		0.932	1.01655		0.979387	6.05047
0.953	0.564897		0.932	1.01828		0.980011	6.04984
0.954	0.565835		0.933	1.02001		0.980635	6.04884
0.954	0.566733		0.933	1.02175		0.981259	6.04746
0.955	0.567307		0.934	1.02348		0.981883	6.04626
0.956	0.567461		0.935	1.02522		0.982507	6.04607
0.956	0.567615		0.935	1.02701		0.983131	6.04561
0.957	0.56777		0.936	1.02918		0.983755	6.0451
0.957	0.567925		0.936	1.03206		0.98438	6.04548
0.958	0.56808		0.937	1.03493		0.985004	6.04567
0.959	0.568217		0.937	1.03781		0.985628	6.04538
0.959	0.567935		0.938	1.04069		0.986252	6.04548
0.96	0.567293		0.939	1.04358		0.986876	6.04549
0.96	0.566633		0.939	1.04661		0.9875	6.04295
0.961	0.565976		0.94	1.05039		0.988124	6.03786
0.962	0.565319		0.94	1.05508		0.988748	6.03213
0.962	0.564662		0.941	1.05978		0.989372	6.0263
0.963	0.564003		0.942	1.0645		0.989996	6.02229
0.963	0.563644		0.942	1.06919		0.99062	6.02104
0.964	0.563293		0.943	1.0739		0.991244	6.02103
0.965	0.562926		0.943	1.07821		0.991868	6.021
0.965	0.562564		0.944	1.08021		0.992493	6.02099
0.966	0.562199		0.945	1.08042		0.993117	6.02133
0.966	0.561837		0.945	1.08064		0.993741	6.02112
0.967	0.561451		0.946	1.08085		0.994365	6.02017
0.968	0.560558		0.946	1.08107		0.994989	6.01964
0.968	0.559452		0.947	1.08128		0.995613	6.01957
0.969	0.558355		0.947	1.08149		0.996237	6.01949
0.969	0.557257		0.948	1.08179		0.996861	6.01893
0.97	0.556157		0.949	1.08217		0.997485	6.01851
0.971	0.555053		0.949	1.08255		0.998109	6.01804
0.971	0.554041		0.95	1.08293		0.998733	6.01744
0.972	0.553409		0.95	1.08331		0.999357	6.01749
0.972	0.553059		0.951	1.08369		0.999982	6.01684
0.973	0.552711		0.952	1.08409		1.00061	6.01697
0.974	0.552361		0.952	1.08553		1.00123	6.01668
0.974	0.55201		0.953	1.08738		1.00185	6.01563
0.975	0.551662		0.953	1.08926		1.00248	6.01553
0.975	0.551242		0.954	1.09112		1.0031	6.01544
0.976	0.550607		0.954	1.093		1.00373	6.01519
0.977	0.549829		0.955	1.09487		1.00435	6.01429
0.977	0.549053		0.956	1.09662		1.00497	6.01417
0.978	0.548277		0.956	1.09687		1.0056	6.0138
0.978	0.547497		0.957	1.09693		1.00622	6.01381
0.979	0.546717		0.957	1.097		1.00685	6.01378
0.98	0.546193		0.958	1.09706		1.00747	6.01355
0.98	0.546419		0.959	1.09713		1.00809	6.01285
0.981	0.546929		0.959	1.09719		1.00872	6.01331
0.981	0.547441		0.96	1.09723		1.00934	6.0134
0.982	0.547954		0.96	1.09712		1.00997	6.01339
0.983	0.548466		0.961	1.09692		1.01059	6.01353
0.983	0.548978		0.962	1.09673		1.01121	6.0127
0.984	0.549715		0.962	1.09653		1.01184	6.01216
0.984	0.551242		0.963	1.09634		1.01246	6.01198
0.985	0.552863		0.963	1.09614		1.01309	6.0127
0.986	0.554485		0.964	1.09584		1.01371	6.01284
0.986	0.556102		0.964	1.09518		1.01433	6.0127
0.987	0.557717		0.965	1.09426		1.01496	6.01315
0.987	0.559329		0.966	1.09335		1.01558	6.01234
0.988	0.560955		0.966	1.09243		1.01621	6.01168
0.989	0.562585		0.967	1.09152		1.01683	6.01119
0.989	0.564208		0.967	1.09061		1.01746	6.01018
0.99	0.565784		0.968	1.08995		1.01808	6.0097
0.99	0.567265		0.969	1.09		1.0187	6.00931
0.991	0.568675		0.969	1.09046		1.01933	6.00908
0.992	0.570138		0.97	1.09091		1.01995	6.00814
0.992	0.571695		0.97	1.09136		1.02058	6.00798
0.993	0.57263		0.971	1.09182		1.0212	6.00784
0.993	0.573553		0.971	1.09227		1.02182	6.00783
0.994	0.574488		0.972	1.09254		1.02245	6.00789
0.995	0.575421		0.973	1.09284		1.02307	6.00739
0.995	0.576359		0.973	1.09322		1.0237	6.00725
0.996	0.577294		0.974	1.09359		1.02432	6.00712
0.996	0.578421		0.974	1.09394		1.02494	6.00591
0.997	0.579957		0.975	1.09428		1.02557	6.00476
0.998	0.58161		0.976	1.09461		1.02619	6.00417
0.998	0.583259		0.976	1.09497		1.02682	6.00331
0.999	0.584908		0.977	1.09528		1.02744	6.00281
0.999	0.586532		0.977	1.09547		1.02807	6.00302
1	0.588148		0.978	1.09564		1.02869	6.00262
1.001	0.588759		0.978	1.09582		1.02931	6.00288
1.001	0.587978		0.979	1.096		1.02994	6.003
1.002	0.586903		0.98	1.09618		1.03056	6.00261
1.002	0.585831		0.98	1.09652		1.03119	6.00232
1.003	0.584764		0.981	1.09664		1.03181	6.00176
1.004	0.583696		0.981	1.09648		1.03243	6.00102
1.004	0.582626		0.982	1.0963		1.03306	5.9998
1.005	0.581888		0.983	1.09613		1.03368	5.99865
1.005	0.581492		0.983	1.09595		1.03431	5.99793
1.006	0.581121		0.984	1.09577		1.03493	5.99766
1.007	0.580743		0.984	1.09563		1.03555	5.99787
1.007	0.580367		0.985	1.09563		1.03618	5.99773
1.008	0.579997		0.986	1.09576		1.0368	5.99762
1.008	0.57962		0.986	1.09589		1.03743	5.99661
1.009	0.579269		0.987	1.09602		1.03805	5.99549
1.01	0.579288		0.987	1.09615		1.03867	5.99537
1.01	0.579306		0.988	1.09628		1.0393	5.9952
1.011	0.579325		0.988	1.09642		1.03992	5.99485
1.011	0.579343		0.989	1.09657		1.04055	5.99519
1.012	0.579361		0.99	1.09673		1.04117	5.99522
1.013	0.579337		0.99	1.09689		1.0418	5.99545
1.013	0.578936		0.991	1.09704		1.04242	5.99572
1.014	0.57788		0.991	1.0972		1.04304	5.99585
1.014	0.576817		0.992	1.09735		1.04367	5.9954
1.015	0.575757		0.993	1.09741		1.04429	5.99528
1.016	0.5747		0.993	1.09737		1.04492	5.99535
1.016	0.573634		0.994	1.09736		1.04554	5.99403
1.017	0.572588		0.994	1.09735		1.04616	5.99337
1.017	0.571532		0.995	1.09734		1.04679	5.99393
1.018	0.57042		0.995	1.09733		1.04741	5.9936
1.019	0.569293		0.996	1.09732		1.04804	5.99284
1.019	0.568166		0.997	1.0971		1.04866	5.99291
1.02	0.567035		0.997	1.09651		1.04928	5.99334
1.02	0.565914		0.998	1.09578		1.04991	5.99329
1.021	0.564809		0.998	1.09505		1.05053	5.99363
1.022	0.563782		0.999	1.09432		1.05116	5.99449
1.022	0.562765		1	1.09359		1.05178	5.99487
1.023	0.561778		1	1.09286		1.0524	5.99528
1.023	0.56077		1.001	1.09226		1.05303	5.99498
1.024	0.559765		1.001	1.09177		1.05365	5.99388
1.025	0.558757		1.002	1.09129		1.05428	5.99357
1.025	0.557757		1.003	1.09081		1.0549	5.99436
1.026	0.557419		1.003	1.09033		1.05553	5.9933
1.026	0.557375		1.004	1.08985		1.05615	5.99316
1.027	0.557334		1.004	1.08937		1.05677	5.99356
1.028	0.557293		1.005	1.0889		1.0574	5.99427
1.028	0.557252		1.005	1.08849		1.05802	5.99503
1.029	0.55721		1.006	1.08809		1.05865	5.99505
1.029	0.557219		1.007	1.0877		1.05927	5.99491
1.03	0.557462		1.007	1.08729		1.05989	5.9955
1.031	0.557831		1.008	1.08689		1.06052	5.99493
1.031	0.558202		1.008	1.08649		1.06114	5.99501
1.032	0.558569		1.009	1.08613		1.06177	5.99478
1.032	0.558935		1.01	1.08586		1.06239	5.99533
1.033	0.559303		1.01	1.0856		1.06301	5.99531
1.034	0.559642		1.011	1.08533		1.06364	5.9955
1.034	0.560188		1.011	1.08506		1.06426	5.99567
1.035	0.561029		1.012	1.0848		1.06489	5.99618
1.035	0.561872		1.012	1.08452		1.06551	5.99634
1.036	0.56271		1.013	1.08418		1.06613	5.99669
1.037	0.563552		1.014	1.08387		1.06676	5.99698
1.037	0.564391		1.014	1.08356		1.06738	5.99639
1.038	0.565069		1.015	1.08324		1.06801	5.99499
1.038	0.564878		1.015	1.08293		1.06863	5.99513
1.039	0.564266		1.016	1.08262		1.06925	5.99524
1.04	0.56365		1.017	1.08231		1.06988	5.9946
1.04	0.563037		1.017	1.08232		1.0705	5.99337
1.041	0.562418		1.018	1.08332		1.07113	5.99327
1.041	0.561805		1.018	1.08429		1.07175	5.99262
1.042	0.56127		1.019	1.08527		1.07238	5.99249
1.043	0.561473		1.02	1.08624		1.073	5.99119
1.043	0.56184		1.02	1.08722		1.07362	5.99153
1.044	0.562187		1.021	1.08819		1.07425	5.99061
1.044	0.562517		1.021	1.08959		1.07487	5.99112
1.045	0.562852		1.022	1.09169		1.0755	5.99078
1.046	0.563207		1.022	1.09391		1.07612	5.9901
1.046	0.56358		1.023	1.09613		1.07674	5.99069
1.047	0.563964		1.024	1.09836		1.07737	5.9913
1.047	0.564356		1.024	1.10059		1.07799	5.99132
1.048	0.564751		1.025	1.10279		1.07862	5.99142
1.049	0.565146		1.025	1.10404		1.07924	5.99197
1.049	0.565541		1.026	1.10383		1.07986	5.99234
1.05	0.565936		1.027	1.1031		1.08049	5.99099
1.05	0.566329		1.027	1.10238		1.08111	5.99161
1.051	0.56664		1.028	1.1017		1.08174	5.99178
1.052	0.566815		1.028	1.10105		1.08236	5.99085
1.052	0.566952		1.029	1.10041		1.08298	5.9901
1.053	0.567088		1.029	1.09996		1.08361	5.98873
1.053	0.567225		1.03	1.10017		1.08423	5.98799
1.054	0.567361		1.031	1.10098		1.08486	5.9873
1.055	0.567497		1.031	1.1018		1.08548	5.98695
1.055	0.567133		1.032	1.10262		1.0861	5.98691
1.056	0.566455		1.032	1.10344		1.08673	5.98735
1.056	0.565738		1.033	1.10425		1.08735	5.98812
1.057	0.565018		1.034	1.10503		1.08798	5.98836
1.058	0.564295		1.034	1.10563		1.0886	5.98742
1.058	0.563569		1.035	1.10607		1.08923	5.98671
1.059	0.562843		1.035	1.10652		1.08985	5.98647
1.059	0.562485		1.036	1.10697		1.09047	5.98571
1.06	0.562092		1.037	1.10741		1.0911	5.98568
1.061	0.561699		1.037	1.10786		1.09172	5.98522
1.061	0.561308		1.038	1.10817		1.09234	5.98452
1.062	0.560914		1.038	1.10792		1.09297	5.98424
1.062	0.560518		1.039	1.10715		1.09359	5.98379
1.063	0.560132		1.039	1.10637		1.09422	5.98332
1.064	0.559759		1.04	1.10559		1.09484	5.98275
1.064	0.559231		1.041	1.10482		1.09547	5.98264
1.065	0.558698		1.041	1.10404		1.09609	5.98268
1.065	0.558168		1.042	1.1035		1.09671	5.9829
1.066	0.557635		1.042	1.10376		1.09734	5.98266
1.067	0.557106		1.043	1.10464		1.09796	5.98236
1.067	0.556629		1.044	1.10551		1.09859	5.98274
1.068	0.556484		1.044	1.10639		1.09921	5.98355
1.068	0.556756		1.045	1.10727		1.09983	5.98387
1.069	0.557027		1.045	1.10815		1.10046	5.98465
1.07	0.557299		1.046	1.10896		1.10108	5.98507
1.07	0.557571		1.046	1.10884		1.10171	5.9855
1.071	0.557844		1.047	1.10797		1.10233	5.98614
1.071	0.558063		1.048	1.1071		1.10295	5.98622
1.072	0.557993		1.048	1.10623		1.10358	5.98681
1.073	0.557722		1.049	1.10536		1.1042	5.98738
1.073	0.557451		1.049	1.10448		1.10483	5.98682
1.074	0.55718		1.05	1.1035		1.10545	5.98725
1.074	0.556914		1.051	1.10182		1.10607	5.98613
1.075	0.556644		1.051	1.09985		1.1067	5.98588
1.076	0.556341		1.052	1.09787		1.10732	5.98462
1.076	0.556147		1.052	1.0959		1.10795	5.9843
1.077	0.556024		1.053	1.09392		1.10857	5.98427
1.077	0.55591		1.053	1.09195		1.10919	5.98371
1.078	0.555796		1.054	1.09005		1.10982	5.98289
1.079	0.555682		1.055	1.0899		1.11044	5.98326
1.079	0.555568		1.055	1.09102		1.11107	5.98238
1.08	0.555454		1.056	1.09228		1.11169	5.98291
1.08	0.557127		1.056	1.09354		1.11232	5.98325
1.081	0.559021		1.057	1.09482		1.11294	5.9827
1.081	0.560927		1.058	1.09607		1.11356	5.98314
1.082	0.562843		1.058	1.09733		1.11419	5.98277
1.083	0.564735		1.059	1.0979		1.11481	5.98442
1.083	0.56664		1.059	1.09789		1.11544	5.98534
1.084	0.568374		1.06	1.09788		1.11606	5.98534
1.084	0.569174		1.061	1.09788		1.11668	5.98579
1.085	0.569955		1.061	1.09787		1.11731	5.98477
1.086	0.570736		1.062	1.09786		1.11793	5.98469
1.086	0.571519		1.062	1.09786		1.11856	5.98336
1.087	0.572302		1.063	1.09793		1.11918	5.98304
1.087	0.573082		1.063	1.09807		1.1198	5.98292
1.088	0.57412		1.064	1.0982		1.12043	5.9824
1.089	0.575837		1.065	1.09834		1.12105	5.98235
1.089	0.577868		1.065	1.09848		1.12168	5.98231
1.09	0.579911		1.066	1.09861		1.1223	5.98114
1.09	0.581949		1.066	1.09891		1.12292	5.98225
1.091	0.583985		1.067	1.0998		1.12355	5.98171
1.092	0.586026		1.068	1.10111		1.12417	5.98221
1.092	0.587622		1.068	1.10242		1.1248	5.98075
1.093	0.58851		1.069	1.10372		1.12542	5.98095
1.093	0.589147		1.069	1.10503		1.12604	5.98172
1.094	0.589784		1.07	1.10634		1.12667	5.98173
1.095	0.590422		1.07	1.1073		1.12729	5.98126
1.095	0.591061		1.071	1.10734		1.12792	5.98063
1.096	0.591699		1.072	1.1068		1.12854	5.98008
1.096	0.593027		1.072	1.10627		1.12917	5.98054
1.097	0.594301		1.073	1.10574		1.12979	5.98034
1.098	0.595449		1.073	1.1052		1.13041	5.98012
1.098	0.596606		1.074	1.10467		1.13104	5.98039
1.099	0.597836		1.075	1.10429		1.13166	5.98032
1.099	0.599145		1.075	1.10435		1.13229	5.98005
1.1	0.600483		1.076	1.10463		1.13291	5.98017
1.101	0.601585		1.076	1.10491		1.13353	5.97936
1.101	0.602657		1.077	1.10519		1.13416	5.97883
1.102	0.603769		1.078	1.10548		1.13478	5.9783
1.102	0.60489		1.078	1.10576		1.13541	5.97818
1.103	0.606002		1.079	1.10618		1.13603	5.97832
1.104	0.607124		1.079	1.10703		1.13665	5.97847
1.104	0.608153		1.08	1.108		1.13728	5.97916
1.105	0.608679		1.08	1.10897		1.1379	5.97961
1.105	0.609303		1.081	1.1099		1.13853	5.98058
1.106	0.609925		1.082	1.11077		1.13915	5.98064
1.107	0.610543		1.082	1.11162		1.13977	5.97994
1.107	0.611152		1.083	1.11243		1.1404	5.9796
1.108	0.611759		1.083	1.11276		1.14102	5.9799
1.108	0.612244		1.084	1.11269		1.14165	5.97957
1.109	0.611675		1.085	1.11261		1.14227	5.9806
1.11	0.610243		1.085	1.11254		1.1429	5.98065
1.11	0.608821		1.086	1.11246		1.14352	5.97982
1.111	0.607407		1.086	1.11238		1.14414	5.97987
1.111	0.605988		1.087	1.11231		1.14477	5.97974
1.112	0.604577		1.087	1.11299		1.14539	5.97967
1.113	0.60332		1.088	1.1139		1.14602	5.97896
1.113	0.602905		1.089	1.1148		1.14664	5.97921
1.114	0.602901		1.089	1.11571		1.14726	5.97992
1.114	0.602897		1.09	1.11662		1.14789	5.98011
1.115	0.602894		1.09	1.11751		1.14851	5.98
1.116	0.60289		1.091	1.11839		1.14914	5.97983
1.116	0.602887		1.092	1.11921		1.14976	5.98009
1.117	0.602938		1.092	1.12		1.15038	5.97927
1.117	0.602636		1.093	1.12078		1.15101	5.97943
1.118	0.602186		1.093	1.12156		1.15163	5.98076
1.119	0.601721		1.094	1.12234		1.15226	5.9808
1.119	0.601258		1.095	1.12312		1.15288	5.98075
1.12	0.60079		1.095	1.12364		1.15351	5.98117
1.12	0.600324		1.096	1.12342		1.15413	5.98047
1.121	0.600319		1.096	1.12271		1.15475	5.98112
1.122	0.601639		1.097	1.12201		1.15538	5.98196
1.122	0.603041		1.097	1.12131		1.156	5.98303
1.123	0.604437		1.098	1.12061		1.15663	5.9824
1.123	0.60584		1.099	1.11991		1.15725	5.98118
1.124	0.607227		1.099	1.11944		1.15787	5.98105
1.125	0.608626		1.1	1.11967		1.1585	5.98082
1.125	0.609444		1.1	1.1204		1.15912	5.98058
1.126	0.608258		1.101	1.12112		1.15975	5.98009
1.126	0.606985		1.102	1.12184		1.16037	5.97905
1.127	0.605708		1.102	1.12257		1.16099	5.97832
1.128	0.604426		1.103	1.1233		1.16162	5.97828
1.128	0.603154		1.103	1.12394		1.16224	5.97772
1.129	0.601881		1.104	1.12424		1.16287	5.97694
1.129	0.600913		1.104	1.1243		1.16349	5.97688
1.13	0.600393		1.105	1.12437		1.16411	5.97679
1.131	0.599917		1.106	1.12443		1.16474	5.97669
1.131	0.599442		1.106	1.1245		1.16536	5.97711
1.132	0.598966		1.107	1.12456		1.16599	5.97689
1.132	0.598489		1.107	1.1246		1.16661	5.97691
1.133	0.598012		1.108	1.12473		1.16724	5.97704
1.134	0.598306		1.109	1.12491		1.16786	5.97714
1.134	0.599368		1.109	1.12511		1.16848	5.97697
1.135	0.600586		1.11	1.1253		1.16911	5.9769
1.135	0.6018		1.11	1.1255		1.16973	5.97553
1.136	0.603006		1.111	1.12569		1.17036	5.97467
1.137	0.604225		1.111	1.12588		1.17098	5.97605
1.137	0.605441		1.112	1.12702		1.1716	5.97552
1.138	0.606339		1.113	1.12846		1.17223	5.97563
1.138	0.60694		1.113	1.12994		1.17285	5.97551
1.139	0.60748		1.114	1.13142		1.17348	5.97461
1.14	0.608024		1.114	1.13288		1.1741	5.97426
1.14	0.60857		1.115	1.13435		1.17472	5.97373
1.141	0.609119		1.116	1.13582		1.17535	5.97342
1.141	0.60966		1.116	1.13559		1.17597	5.97329
1.142	0.610237		1.117	1.13504		1.1766	5.97389
1.143	0.610987		1.117	1.13448		1.17722	5.97437
1.143	0.611745		1.118	1.13391		1.17784	5.97319
1.144	0.612497		1.119	1.13336		1.17847	5.97195
1.144	0.613252		1.119	1.13279		1.17909	5.97089
1.145	0.61401		1.12	1.1323		1.17972	5.9698
1.146	0.61475		1.12	1.13223		1.18034	5.96971
1.146	0.615361		1.121	1.1324		1.18096	5.97004
1.147	0.615857		1.121	1.13257		1.18159	5.97055
1.147	0.616352		1.122	1.13274		1.18221	5.97098
1.148	0.616848		1.123	1.13291		1.18284	5.97007
1.149	0.617347		1.123	1.13307		1.18346	5.97012
1.149	0.617841		1.124	1.13335		1.18409	5.97102
1.15	0.618184		1.124	1.13397		1.18471	5.97084
1.15	0.618026		1.125	1.13482		1.18533	5.97102
1.151	0.617463		1.126	1.13566		1.18596	5.97195
1.152	0.616918		1.126	1.13651		1.18658	5.97098
1.152	0.61634		1.127	1.13735		1.18721	5.97148
1.153	0.615726		1.127	1.1382		1.18783	5.9717
1.153	0.615096		1.128	1.13884		1.18845	5.97202
1.154	0.614456		1.128	1.13892		1.18908	5.97179
1.155	0.613713		1.129	1.13866		1.1897	5.97191
1.155	0.613926		1.13	1.1384		1.19033	5.97161
1.156	0.614139		1.13	1.13814		1.19095	5.97339
1.156	0.614352		1.131	1.13788		1.19157	5.97359
1.157	0.614565		1.131	1.13762		1.1922	5.97502
1.158	0.614778		1.132	1.1375		1.19282	5.97579
1.158	0.615006		1.133	1.13785		1.19345	5.97601
1.159	0.615389		1.133	1.13851		1.19407	5.97625
1.159	0.616084		1.134	1.13918		1.19469	5.97556
1.16	0.616757		1.134	1.13982		1.19532	5.97645
1.161	0.617427		1.135	1.14043		1.19594	5.97649
1.161	0.618095		1.136	1.14101		1.19657	5.97697
1.162	0.618765		1.136	1.14164		1.19719	5.97731
1.162	0.619409		1.137	1.14249		1.19782	5.97692
1.163	0.619553		1.137	1.14367		1.19844	5.97716
1.164	0.618572		1.138	1.14486		1.19906	5.97769
1.164	0.617378		1.138	1.14604		1.19969	5.97808
1.165	0.616184		1.139	1.14723		1.20031	5.97825
1.165	0.614995		1.14	1.14841		1.20094	5.97986
1.166	0.613803		1.14	1.14957		1.20156	5.98069
1.167	0.612603		1.141	1.15026		1.20218	5.97954
1.167	0.611933		1.141	1.14989		1.20281	5.98005
1.168	0.612215		1.142	1.14943		1.20343	5.97936
1.168	0.612672		1.143	1.14897		1.20406	5.97918
1.169	0.613129		1.143	1.14851		1.20468	5.97888
1.17	0.613587		1.144	1.14805		1.2053	5.97954
1.17	0.614045		1.144	1.14758		1.20593	5.97938
1.171	0.614502		1.145	1.14731		1.20655	5.9801
1.171	0.614881		1.145	1.14759		1.20718	5.97937
1.172	0.615041		1.146	1.14803		1.2078	5.97889
1.173	0.61509		1.147	1.14847		1.20842	5.97868
1.173	0.61514		1.147	1.14891		1.20905	5.97915
1.174	0.61519		1.148	1.14935		1.20967	5.98002
1.174	0.61524		1.148	1.1498		1.2103	5.98011
1.175	0.61529		1.149	1.15031		1.21092	5.98097
1.176	0.615316		1.15	1.15089		1.21154	5.98103
1.176	0.615328		1.15	1.15132		1.21217	5.98086
1.177	0.615337		1.151	1.15176		1.21279	5.98109
1.177	0.615347		1.151	1.15219		1.21342	5.9803
1.178	0.615357		1.152	1.15262		1.21404	5.97994
1.179	0.615367		1.153	1.15305		1.21467	5.98024
1.179	0.615374		1.153	1.15341		1.21529	5.97947
1.18	0.615222		1.154	1.15364		1.21591	5.97897
1.18	0.614748		1.154	1.15382		1.21654	5.97839
1.181	0.614274		1.155	1.15401		1.21716	5.97731
1.182	0.613801		1.155	1.15419		1.21778	5.97722
1.182	0.613331		1.156	1.15438		1.21841	5.9763
1.183	0.612857		1.157	1.15457		1.21903	5.97578
1.183	0.612434		1.157	1.15448		1.21966	5.97635
1.184	0.612448		1.158	1.15438		1.22028	5.97696
1.185	0.613241		1.158	1.15437		1.22091	5.97698
1.185	0.614081		1.159	1.15437		1.22153	5.97664
1.186	0.614918		1.16	1.15437		1.22215	5.97602
1.186	0.615755		1.16	1.15436		1.22278	5.97534
1.187	0.616591		1.161	1.15436		1.2234	5.9742
1.188	0.61739		1.161	1.15402		1.22403	5.9733
1.188	0.617558		1.162	1.15315		1.22465	5.97234
1.189	0.617001		1.162	1.15216		1.22527	5.97172
1.189	0.616337		1.163	1.15116		1.2259	5.97153
1.19	0.615671		1.164	1.15015		1.22652	5.97095
1.191	0.615008		1.164	1.14915		1.22715	5.97104
1.191	0.614344		1.165	1.14816		1.22777	5.9707
1.192	0.613734		1.165	1.14748		1.22839	5.97031
1.192	0.613848		1.166	1.14636		1.22902	5.96973
1.193	0.614717		1.167	1.14516		1.22964	5.96837
1.194	0.615778		1.167	1.14395		1.23027	5.96704
1.194	0.616835		1.168	1.14274		1.23089	5.96587
1.195	0.617886		1.168	1.14153		1.23151	5.96534
1.195	0.618941		1.169	1.14033		1.23214	5.96519
1.196	0.620004		1.169	1.13948		1.23276	5.96423
[truncated: 39,902 more rows]

## Sheet: 9c
PIII no PDI			PIII hPDI			PIII sPDI
UV 1_280			UV 1_280			UV 1_280
ml	A280		ml	mAU		ml	mAU
0	0.5831		0	0.410706		0	0.379995
0.001	0.594926		0.001	0.4118		0.001	0.388408
0.002	0.606761		0.002	0.412891		0.002	0.396845
0.002	0.61856		0.002	0.413066		0.002	0.405498
0.003	0.630415		0.003	0.412231		0.003	0.414364
0.003	0.642307		0.003	0.411188		0.003	0.423264
0.004	0.654217		0.004	0.410139		0.004	0.432109
0.005	0.664999		0.005	0.409098		0.005	0.440208
0.005	0.670273		0.005	0.408052		0.005	0.44455
0.006	0.672299		0.006	0.407014		0.006	0.444837
0.007	0.674327		0.006	0.40637		0.006	0.445108
0.007	0.676284		0.007	0.406657		0.007	0.445357
0.008	0.677913		0.008	0.407157		0.008	0.445607
0.008	0.67932		0.008	0.407663		0.008	0.445855
0.009	0.680731		0.009	0.408164		0.009	0.446103
0.01	0.682146		0.009	0.408664		0.01	0.446352
0.01	0.683553		0.01	0.409127		0.01	0.446601
0.011	0.684961		0.011	0.409116		0.011	0.446841
0.012	0.686378		0.011	0.40784		0.011	0.447051
0.012	0.688149		0.012	0.406445		0.012	0.447261
0.013	0.69029		0.012	0.405034		0.013	0.447471
0.013	0.692438		0.013	0.403635		0.013	0.447681
0.014	0.694585		0.014	0.402232		0.014	0.447891
0.015	0.696722		0.014	0.40084		0.014	0.448101
0.015	0.698858		0.015	0.399444		0.015	0.448299
0.016	0.700941		0.015	0.399417		0.016	0.448389
0.016	0.701962		0.016	0.399943		0.016	0.448352
0.017	0.701493		0.017	0.400535		0.017	0.448271
0.018	0.700776		0.017	0.401124		0.017	0.44819
0.018	0.70006		0.018	0.401711		0.018	0.448109
0.019	0.699342		0.018	0.4023		0.019	0.448029
0.02	0.698629		0.019	0.40289		0.019	0.447948
0.02	0.697921		0.02	0.402703		0.02	0.448184
0.021	0.69747		0.02	0.401603		0.021	0.448734
0.021	0.697638		0.021	0.40022		0.021	0.449291
0.022	0.698006		0.021	0.398854		0.022	0.449824
0.023	0.69838		0.022	0.397475		0.022	0.450323
0.023	0.698754		0.023	0.396093		0.023	0.450814
0.024	0.699127		0.023	0.394725		0.024	0.451323
0.024	0.699502		0.024	0.393942		0.024	0.451664
0.025	0.699578		0.024	0.394456		0.025	0.451469
0.026	0.69869		0.025	0.395407		0.025	0.450883
0.026	0.697586		0.026	0.396354		0.026	0.450296
0.027	0.696471		0.026	0.397308		0.027	0.449707
0.028	0.695366		0.027	0.398257		0.027	0.449121
0.028	0.694256		0.027	0.399206		0.028	0.448536
0.029	0.693146		0.028	0.400075		0.028	0.448082
0.029	0.691996		0.029	0.400278		0.029	0.448059
0.03	0.690689		0.029	0.400065		0.03	0.448411
0.031	0.689267		0.03	0.399851		0.03	0.448763
0.031	0.687841		0.03	0.399638		0.031	0.449114
0.032	0.686413		0.031	0.399425		0.032	0.449464
0.032	0.684981		0.032	0.399213		0.032	0.449815
0.033	0.683555		0.032	0.399		0.033	0.450145
0.034	0.682097		0.033	0.399249		0.033	0.450351
0.034	0.680359		0.033	0.399723		0.034	0.450367
0.035	0.678403		0.034	0.400205		0.035	0.450396
0.036	0.676457		0.035	0.400686		0.035	0.450425
0.036	0.674506		0.035	0.401191		0.036	0.450455
0.037	0.672559		0.036	0.401724		0.036	0.450483
0.037	0.670611		0.037	0.402268		0.037	0.450513
0.038	0.668732		0.037	0.402571		0.038	0.450555
0.039	0.668086		0.038	0.402044		0.038	0.450785
0.039	0.668951		0.038	0.401002		0.039	0.45103
0.04	0.669815		0.039	0.399962		0.039	0.451277
0.04	0.670677		0.04	0.398922		0.04	0.451523
0.041	0.671537		0.04	0.397882		0.041	0.451768
0.042	0.6724		0.041	0.396841		0.041	0.452015
0.042	0.673251		0.041	0.39581		0.042	0.452261
0.043	0.674652		0.042	0.395207		0.043	0.45188
0.044	0.675935		0.043	0.39557		0.043	0.45136
0.044	0.677245		0.043	0.395944		0.044	0.450822
0.045	0.678631		0.044	0.396317		0.044	0.450286
0.045	0.680073		0.044	0.396691		0.045	0.449754
0.046	0.681528		0.045	0.397064		0.046	0.449218
0.047	0.682982		0.046	0.397436		0.046	0.448682
0.047	0.684384		0.046	0.397757		0.047	0.449206
0.048	0.686545		0.047	0.397527		0.047	0.450217
0.049	0.68958		0.047	0.397042		0.048	0.45127
0.049	0.692798		0.048	0.396533		0.049	0.452334
0.05	0.69603		0.049	0.396025		0.049	0.453387
0.05	0.699266		0.049	0.395518		0.05	0.454443
0.051	0.702493		0.05	0.395009		0.05	0.455499
0.052	0.705634		0.05	0.394411		0.051	0.455802
0.052	0.707634		0.051	0.393817		0.052	0.455269
0.053	0.708321		0.052	0.393355		0.052	0.454502
0.053	0.708801		0.052	0.392924		0.053	0.453734
0.054	0.709281		0.053	0.392491		0.054	0.452958
0.055	0.70976		0.053	0.392058		0.054	0.452185
0.055	0.710241		0.054	0.391627		0.055	0.451419
0.056	0.710721		0.055	0.391262		0.055	0.451267
0.057	0.713946		0.055	0.391002		0.056	0.452215
0.057	0.721519		0.056	0.390277		0.057	0.453555
0.058	0.72926		0.056	0.389317		0.057	0.454897
0.058	0.737058		0.057	0.388354		0.058	0.456244
0.059	0.74482		0.058	0.387387		0.058	0.457584
0.06	0.752563		0.058	0.386427		0.059	0.458931
0.06	0.760343		0.059	0.385462		0.06	0.460581
0.061	0.76724		0.059	0.384486		0.06	0.46318
0.061	0.772213		0.06	0.38381		0.061	0.466254
0.062	0.777141		0.061	0.38333		0.061	0.469378
0.063	0.78207		0.061	0.382869		0.062	0.472458
0.063	0.787014		0.062	0.382405		0.063	0.475561
0.064	0.791944		0.062	0.381945		0.063	0.478667
0.065	0.796916		0.063	0.381483		0.064	0.481656
0.065	0.800913		0.064	0.381237		0.065	0.483846
0.066	0.801728		0.064	0.382565		0.065	0.485226
0.066	0.802669		0.065	0.384427		0.066	0.486587
0.067	0.803613		0.065	0.386199		0.066	0.487956
0.068	0.804558		0.066	0.387978		0.067	0.489323
0.068	0.805492		0.067	0.389758		0.068	0.49069
0.069	0.806431		0.067	0.391533		0.068	0.492061
0.069	0.807851		0.068	0.393258		0.069	0.493838
0.07	0.812335		0.068	0.394847		0.069	0.496062
0.071	0.816782		0.069	0.396561		0.07	0.498279
0.071	0.821297		0.07	0.398635		0.071	0.50052
0.072	0.82577		0.07	0.400714		0.071	0.502728
0.073	0.830318		0.071	0.402783		0.072	0.504954
0.073	0.834778		0.071	0.404849		0.072	0.507182
0.074	0.839375		0.072	0.406926		0.073	0.50925
0.074	0.845836		0.073	0.409101		0.074	0.510496
0.075	0.852293		0.073	0.411796		0.074	0.51165
0.076	0.858695		0.074	0.414491		0.075	0.512825
0.076	0.865177		0.074	0.417162		0.076	0.513949
0.077	0.871608		0.075	0.419836		0.076	0.515064
0.077	0.878059		0.076	0.422515		0.077	0.516214
0.078	0.884469		0.076	0.425202		0.077	0.517386
0.079	0.887118		0.077	0.427877		0.078	0.517653
0.079	0.888879		0.077	0.429895		0.079	0.517131
0.08	0.890593		0.078	0.431822		0.079	0.516528
0.081	0.892299		0.079	0.433743		0.08	0.515924
0.081	0.894031		0.079	0.435667		0.08	0.515321
0.082	0.895732		0.08	0.437594		0.081	0.514718
0.082	0.897441		0.08	0.439507		0.082	0.514114
0.083	0.898303		0.081	0.441423		0.082	0.513823
0.084	0.898623		0.082	0.442902		0.083	0.514047
0.084	0.89887		0.082	0.443947		0.083	0.514384
0.085	0.899119		0.083	0.444871		0.084	0.514721
0.086	0.899369		0.083	0.445797		0.085	0.515059
0.086	0.899618		0.084	0.446723		0.085	0.515396
0.087	0.899868		0.085	0.447648		0.086	0.515732
0.087	0.899926		0.085	0.448573		0.087	0.515733
0.088	0.895225		0.086	0.449354		0.087	0.514719
0.089	0.889208		0.086	0.449658		0.088	0.513455
0.089	0.883252		0.087	0.449495		0.088	0.512199
0.09	0.877256		0.088	0.449335		0.089	0.510946
0.09	0.871243		0.088	0.449169		0.09	0.509686
0.091	0.865223		0.089	0.449		0.09	0.508424
0.092	0.858792		0.089	0.448831		0.091	0.507069
0.092	0.85345		0.09	0.448662		0.091	0.504902
0.093	0.84868		0.091	0.448497		0.092	0.502173
0.094	0.84387		0.091	0.448449		0.093	0.499418
0.094	0.83907		0.092	0.448404		0.093	0.496681
0.095	0.834298		0.092	0.448358		0.094	0.493957
0.095	0.829506		0.093	0.448313		0.094	0.491218
0.096	0.825224		0.094	0.448268		0.095	0.488461
0.097	0.824665		0.094	0.448222		0.096	0.486155
0.097	0.826585		0.095	0.448094		0.096	0.484276
0.098	0.828562		0.095	0.446204		0.097	0.482407
0.098	0.830559		0.096	0.443628		0.097	0.480551
0.099	0.83255		0.097	0.441059		0.098	0.478678
0.1	0.834541		0.097	0.438489		0.099	0.476813
0.1	0.836541		0.098	0.435921		0.099	0.47496
0.101	0.836674		0.098	0.433356		0.1	0.473193
0.102	0.833702		0.099	0.430802		0.101	0.471364
0.102	0.830041		0.1	0.428582		0.101	0.469519
0.103	0.826387		0.1	0.426714		0.102	0.467667
0.103	0.82273		0.101	0.424847		0.102	0.465817
0.104	0.819071		0.102	0.42298		0.103	0.463973
0.105	0.815418		0.102	0.421107		0.104	0.462133
0.105	0.810123		0.103	0.419245		0.104	0.459956
0.106	0.801282		0.103	0.417378		0.105	0.458237
0.106	0.792013		0.104	0.415379		0.105	0.456883
0.107	0.782731		0.105	0.412929		0.106	0.455521
0.108	0.77347		0.105	0.410479		0.107	0.454162
0.108	0.764186		0.106	0.408051		0.107	0.452807
0.109	0.754872		0.106	0.405591		0.108	0.451435
0.11	0.746673		0.107	0.403133		0.108	0.450072
0.11	0.742063		0.108	0.400657		0.109	0.448919
0.111	0.738298		0.108	0.398255		0.11	0.447955
0.111	0.73452		0.109	0.396581		0.11	0.447013
0.112	0.730733		0.109	0.394974		0.111	0.446068
0.113	0.72697		0.11	0.393394		0.112	0.445122
0.113	0.723184		0.111	0.391793		0.112	0.444182
0.114	0.719592		0.111	0.390185		0.113	0.443237
0.114	0.717104		0.112	0.388587		0.113	0.442336
0.115	0.71559		0.112	0.386979		0.114	0.441494
0.116	0.714069		0.113	0.386226		0.115	0.440621
0.116	0.71255		0.114	0.386065		0.115	0.439754
0.117	0.711033		0.114	0.385904		0.116	0.438889
0.118	0.709517		0.115	0.385746		0.116	0.43802
0.118	0.708073		0.115	0.385586		0.117	0.437147
0.119	0.707674		0.116	0.385426		0.118	0.436358
0.119	0.707815		0.117	0.385266		0.118	0.435921
0.12	0.707958		0.117	0.385601		0.119	0.435842
0.121	0.708099		0.118	0.386022		0.119	0.435763
0.121	0.708241		0.118	0.386453		0.12	0.435684
0.122	0.708383		0.119	0.386871		0.121	0.435606
0.123	0.708525		0.12	0.387298		0.121	0.435527
0.123	0.708754		0.12	0.387722		0.122	0.435432
0.124	0.709526		0.121	0.388146		0.123	0.43516
0.124	0.710309		0.121	0.387588		0.123	0.434824
0.125	0.711089		0.122	0.386979		0.124	0.434488
0.126	0.711876		0.123	0.386374		0.124	0.434152
0.126	0.712662		0.123	0.385772		0.125	0.433814
0.127	0.713464		0.124	0.385162		0.126	0.433477
0.127	0.713695		0.124	0.384559		0.126	0.433139
0.128	0.712472		0.125	0.383954		0.127	0.433145
0.129	0.711066		0.126	0.383277		0.127	0.43353
0.129	0.709678		0.126	0.382432		0.128	0.433937
0.13	0.708304		0.127	0.38155		0.129	0.434339
0.131	0.706902		0.127	0.380669		0.129	0.434725
0.131	0.705518		0.128	0.379781		0.13	0.435119
0.132	0.703844		0.129	0.378904		0.13	0.435522
0.132	0.701761		0.129	0.378023		0.131	0.43554
0.133	0.699627		0.13	0.377225		0.132	0.435055
0.134	0.697484		0.13	0.376787		0.132	0.434434
0.134	0.695345		0.131	0.376472		0.133	0.433811
0.135	0.693196		0.132	0.376155		0.134	0.433184
0.135	0.691064		0.132	0.375838		0.134	0.432557
0.136	0.689111		0.133	0.37552		0.135	0.431928
0.137	0.689317		0.133	0.375204		0.135	0.431778
0.137	0.690137		0.134	0.374886		0.136	0.432141
0.138	0.690952		0.135	0.374532		0.137	0.43259
0.139	0.691774		0.135	0.37416		0.137	0.433015
0.139	0.692593		0.136	0.37379		0.138	0.433441
0.14	0.69341		0.136	0.373416		0.138	0.433868
0.14	0.694039		0.137	0.373046		0.139	0.434294
0.141	0.694059		0.138	0.372674		0.14	0.43472
0.142	0.69378		0.138	0.372222		0.14	0.43503
0.142	0.693473		0.139	0.371405		0.141	0.435242
0.143	0.693165		0.139	0.370403		0.141	0.435433
0.143	0.692859		0.14	0.36943		0.142	0.435625
0.144	0.692552		0.141	0.368514		0.143	0.435815
0.145	0.692465		0.141	0.367633		0.143	0.436005
0.145	0.692847		0.142	0.366748		0.144	0.436194
0.146	0.693445		0.142	0.365812		0.145	0.43652
0.147	0.694043		0.143	0.364885		0.145	0.437066
0.147	0.694639		0.144	0.364324		0.146	0.437676
0.148	0.695235		0.144	0.363762		0.146	0.438284
0.148	0.695832		0.145	0.363198		0.147	0.438892
0.149	0.696559		0.145	0.362637		0.148	0.4395
0.15	0.697239		0.146	0.362076		0.148	0.440106
0.15	0.697684		0.147	0.361514		0.149	0.440528
0.151	0.698026		0.147	0.360932		0.149	0.44063
0.151	0.698377		0.148	0.360045		0.15	0.440619
0.152	0.698729		0.148	0.359164		0.151	0.440608
0.153	0.699081		0.149	0.358288		0.151	0.440597
0.153	0.699603		0.15	0.357416		0.152	0.440585
0.154	0.701009		0.15	0.356549		0.152	0.440574
0.155	0.703648		0.151	0.355673		0.153	0.440555
0.155	0.706513		0.151	0.354801		0.154	0.440964
0.156	0.709393		0.152	0.355134		0.154	0.441741
0.156	0.71226		0.153	0.355635		0.155	0.442586
0.157	0.715126		0.153	0.356148		0.156	0.443438
0.158	0.718013		0.154	0.356657		0.156	0.444285
0.158	0.721024		0.154	0.35717		0.157	0.445131
0.159	0.724324		0.155	0.357681		0.157	0.445976
0.159	0.727556		0.156	0.358193		0.158	0.447156
0.16	0.730783		0.156	0.359139		0.159	0.448796
0.161	0.733995		0.157	0.360457		0.159	0.4506
0.161	0.737224		0.157	0.361861		0.16	0.452402
0.162	0.740454		0.158	0.363263		0.16	0.454207
0.163	0.743849		0.159	0.364669		0.161	0.455999
0.163	0.748449		0.159	0.366074		0.162	0.4578
0.164	0.754039		0.16	0.367485		0.162	0.459334
0.164	0.759634		0.16	0.369434		0.163	0.460384
0.165	0.765213		0.161	0.372134		0.163	0.461237
0.166	0.770814		0.162	0.375055		0.164	0.462086
0.166	0.776371		0.162	0.377959		0.165	0.462935
0.167	0.782044		0.163	0.380881		0.165	0.463788
0.168	0.788981		0.163	0.3838		0.166	0.464637
0.168	0.798005		0.164	0.386721		0.167	0.465732
0.169	0.80707		0.165	0.389776		0.167	0.467933
0.169	0.816115		0.165	0.393035		0.168	0.47092
0.17	0.825227		0.166	0.396348		0.168	0.473917
0.171	0.834327		0.167	0.399671		0.169	0.47691
0.171	0.843404		0.167	0.402992		0.17	0.479916
0.172	0.854175		0.168	0.406303		0.17	0.482923
0.172	0.869928		0.168	0.409629		0.171	0.48594
0.173	0.885876		0.169	0.413764		0.171	0.491142
0.174	0.901561		0.17	0.419747		0.172	0.498503
0.174	0.917473		0.17	0.426436		0.173	0.505828
0.175	0.933137		0.171	0.43312		0.173	0.513196
0.176	0.949045		0.171	0.439755		0.174	0.520554
0.176	0.964542		0.172	0.446416		0.174	0.527876
0.177	0.993163		0.173	0.453107		0.175	0.535166
0.177	1.02215		0.173	0.460231		0.176	0.544861
0.178	1.05165		0.174	0.471609		0.176	0.558526
0.179	1.08054		0.174	0.485138		0.177	0.57349
0.179	1.10993		0.175	0.498655		0.178	0.588376
0.18	1.13877		0.176	0.51222		0.178	0.603285
0.18	1.16761		0.176	0.525746		0.179	0.61824
0.181	1.19962		0.177	0.539192		0.179	0.633125
0.182	1.23179		0.177	0.552656		0.18	0.649592
0.182	1.26428		0.178	0.569666		0.181	0.669644
0.183	1.29686		0.179	0.589668		0.181	0.691401
0.184	1.32952		0.179	0.610136		0.182	0.712618
0.184	1.36198		0.18	0.630553		0.182	0.732723
0.185	1.39407		0.18	0.65106		0.183	0.751838
0.185	1.4577		0.181	0.671504		0.184	0.770923
0.186	1.53126		0.182	0.691986		0.184	0.791241
0.187	1.60534		0.182	0.715945		0.185	0.814055
0.187	1.67972		0.183	0.7436		0.185	0.841556
0.188	1.75399		0.183	0.77224		0.186	0.869454
0.188	1.82863		0.184	0.80099		0.187	0.89742
0.189	1.90323		0.185	0.829726		0.187	0.925339
0.19	1.95649		0.185	0.858377		0.188	0.953252
0.19	1.99801		0.186	0.887135		0.189	0.981105
0.191	2.03818		0.186	0.917668		0.189	1.00937
0.192	2.0785		0.187	0.95068		0.19	1.04145
0.192	2.11864		0.188	0.984722		0.19	1.07419
0.193	2.15882		0.188	1.01865		0.191	1.10682
0.193	2.19892		0.189	1.05262		0.192	1.1393
0.194	2.24038		0.189	1.08666		0.192	1.17182
0.195	2.28255		0.19	1.12051		0.193	1.20448
0.195	2.3248		0.191	1.15443		0.193	1.23743
0.196	2.36687		0.191	1.18939		0.194	1.27357
0.196	2.40875		0.192	1.22523		0.195	1.31086
0.197	2.45076		0.192	1.26121		0.195	1.34801
0.198	2.4931		0.193	1.29709		0.196	1.38524
0.198	2.53526		0.194	1.33174		0.196	1.42256
0.199	2.57754		0.194	1.36431		0.197	1.45997
0.2	2.62008		0.195	1.3959		0.198	1.49724
0.2	2.66271		0.195	1.42885		0.198	1.53349
0.201	2.70534		0.196	1.4658		0.199	1.56916
0.201	2.74798		0.197	1.50464		0.2	1.60511
0.202	2.79067		0.197	1.54367		0.2	1.64093
0.203	2.83187		0.198	1.58301		0.201	1.6768
0.203	2.86777		0.198	1.62247		0.201	1.71285
0.204	2.89967		0.199	1.66175		0.202	1.74882
0.205	2.93149		0.2	1.70032		0.203	1.78183
0.205	2.9652		0.2	1.73848		0.203	1.81159
0.206	3.00083		0.201	1.77673		0.204	1.84082
0.206	3.03667		0.201	1.81481		0.204	1.86994
0.207	3.07252		0.202	1.85269		0.205	1.89913
0.208	3.10625		0.203	1.89061		0.206	1.9284
0.208	3.12634		0.203	1.92786		0.206	1.95748
0.209	3.14634		0.204	1.96104		0.207	1.98452
0.209	3.16632		0.204	1.99054		0.207	2.00895
0.21	3.18632		0.205	2.02		0.208	2.03289
0.211	3.20633		0.206	2.04934		0.209	2.05699
0.211	3.22626		0.206	2.07855		0.209	2.08113
0.212	3.24593		0.207	2.10764		0.21	2.1052
0.213	3.26124		0.207	2.13665		0.211	2.12921
0.213	3.27583		0.208	2.16343		0.211	2.15131
0.214	3.29037		0.209	2.18655		0.212	2.16995
0.214	3.30494		0.209	2.20884		0.212	2.18715
0.215	3.31953		0.21	2.23109		0.213	2.20427
0.216	3.33409		0.21	2.25336		0.214	2.22136
0.216	3.34848		0.211	2.27567		0.214	2.23858
0.217	3.32231		0.212	2.29805		0.215	2.25572
0.217	3.29062		0.212	2.3181		0.215	2.2719
0.218	3.25885		0.213	2.33282		0.216	2.28458
0.219	3.22719		0.213	2.34582		0.217	2.29434
0.219	3.19558		0.214	2.35884		0.217	2.30408
0.22	3.1637		0.215	2.37181		0.218	2.31377
0.221	3.13203		0.215	2.38492		0.218	2.32343
0.221	3.12524		0.216	2.39807		0.219	2.33315
0.222	3.12374		0.216	2.40943		0.22	2.34201
0.222	3.12253		0.217	2.41577		0.22	2.34616
0.223	3.12131		0.218	2.41969		0.221	2.34532
0.224	3.12009		0.218	2.4236		0.222	2.34449
0.224	3.11887		0.219	2.42752		0.222	2.34365
0.225	3.11765		0.219	2.43144		0.223	2.34281
0.225	3.11419		0.22	2.43539		0.223	2.34197
0.226	3.10676		0.221	2.43883		0.224	2.34105
0.227	3.09881		0.221	2.44009		0.225	2.33816
0.227	3.09085		0.222	2.43882		0.225	2.33239
0.228	3.08285		0.222	2.43756		0.226	2.32661
0.229	3.07489		0.223	2.43629		0.226	2.32086
0.229	3.06689		0.224	2.43503		0.227	2.31511
0.23	3.05816		0.224	2.43377		0.228	2.30934
0.23	3.04201		0.225	2.43198		0.228	2.30355
0.231	3.02397		0.225	2.42769		0.229	2.29724
0.232	3.00608		0.226	2.42076		0.229	2.29027
0.232	2.98811		0.227	2.41382		0.23	2.28326
0.233	2.96998		0.227	2.40685		0.231	2.27623
0.233	2.95196		0.228	2.39987		0.231	2.26923
0.234	2.93432		0.228	2.39301		0.232	2.26225
0.235	2.91526		0.229	2.38565		0.233	2.25511
0.235	2.89558		0.23	2.37638		0.233	2.24664
0.236	2.87588		0.23	2.36496		0.234	2.23703
0.237	2.85627		0.231	2.3536		0.234	2.22829
0.237	2.83655		0.231	2.34226		0.235	2.21965
0.238	2.81683		0.232	2.33091		0.236	2.2113
0.238	2.79724		0.233	2.31965		0.236	2.20344
0.239	2.77664		0.233	2.30799		0.237	2.19584
0.24	2.75578		0.234	2.29519		0.237	2.18771
0.24	2.73489		0.235	2.28187		0.238	2.17571
0.241	2.71406		0.235	2.26854		0.239	2.16166
0.242	2.69324		0.236	2.25521		0.239	2.14748
0.242	2.6724		0.236	2.24184		0.24	2.13327
0.243	2.6516		0.237	2.22847		0.24	2.11905
0.243	2.63007		0.238	2.21486		0.241	2.10458
0.244	2.60787		0.238	2.19995		0.242	2.09007
0.245	2.58555		0.239	2.18377		0.242	2.07481
0.245	2.56319		0.239	2.16762		0.243	2.05938
0.246	2.54077		0.24	2.15156		0.244	2.04404
0.246	2.51838		0.241	2.13547		0.244	2.02877
0.247	2.49607		0.241	2.11932		0.245	2.01348
0.248	2.47348		0.242	2.10303		0.245	1.99828
0.248	2.45088		0.242	2.08581		0.246	1.98223
0.249	2.42856		0.243	2.06775		0.247	1.96444
0.25	2.40629		0.244	2.05003		0.247	1.94691
0.25	2.38411		0.244	2.03233		0.248	1.92939
0.251	2.36188		0.245	2.01441		0.248	1.91194
0.251	2.33962		0.245	1.99662		0.249	1.89455
0.252	2.31707		0.246	1.97883		0.25	1.87732
0.253	2.29517		0.247	1.96111		0.25	1.85977
0.253	2.27465		0.247	1.94507		0.251	1.84272
0.254	2.2542		0.248	1.93067		0.251	1.82808
0.254	2.23368		0.248	1.91682		0.252	1.81339
0.255	2.21315		0.249	1.90229		0.253	1.79879
0.256	2.19268		0.25	1.88682		0.253	1.78418
0.256	2.17228		0.25	1.87091		0.254	1.76962
0.257	2.15301		0.251	1.85478		0.255	1.75501
0.258	2.13601		0.251	1.83782		0.255	1.7406
0.258	2.1186		0.252	1.8207		0.256	1.72692
0.259	2.09991		0.253	1.80389		0.256	1.71316
0.259	2.08061		0.253	1.78707		0.257	1.69939
0.26	2.06123		0.254	1.77026		0.258	1.68562
0.261	2.04181		0.254	1.75349		0.258	1.67181
0.261	2.02168		0.255	1.73677		0.259	1.65785
0.262	2.00626		0.256	1.71993		0.259	1.64317
0.262	1.991		0.256	1.70356		0.26	1.62882
0.263	1.97579		0.257	1.68785		0.261	1.61442
0.264	1.96055		0.257	1.67216		0.261	1.59997
0.264	1.94526		0.258	1.65649		0.262	1.58568
0.265	1.9301		0.259	1.64086		0.262	1.57118
0.266	1.91409		0.259	1.62518		0.263	1.5567
0.266	1.89907		0.26	1.60988		0.264	1.54252
0.267	1.88421		0.26	1.59581		0.264	1.5316
0.267	1.86936		0.261	1.58269		0.265	1.52069
0.268	1.85444		0.262	1.56952		0.266	1.50969
0.269	1.83966		0.262	1.55626		0.266	1.4988
0.269	1.82471		0.263	1.54304		0.267	1.48781
0.27	1.80975		0.263	1.52979		0.267	1.47693
0.27	1.79714		0.264	1.51643		0.268	1.46636
0.271	1.78486		0.265	1.50318		0.269	1.45778
0.272	1.77275		0.265	1.4905		0.269	1.44911
0.272	1.76055		0.266	1.47779		0.27	1.4405
0.273	1.74841		0.266	1.46508		0.27	1.43187
0.274	1.73619		0.267	1.4523		0.271	1.42321
0.274	1.72401		0.268	1.43956		0.272	1.41459
0.275	1.71243		0.268	1.42713		0.272	1.40582
0.275	1.70153		0.269	1.41568		0.273	1.39671
0.276	1.69097		0.269	1.40514		0.273	1.38756
0.277	1.68034		0.27	1.3946		0.274	1.37851
0.277	1.66959		0.271	1.38411		0.275	1.3694
0.278	1.65896		0.271	1.3736		0.275	1.36024
0.279	1.64831		0.272	1.36313		0.276	1.3512
0.279	1.63889		0.272	1.35279		0.277	1.34274
0.28	1.63051		0.273	1.34339		0.277	1.33726
0.28	1.62234		0.274	1.33511		0.278	1.33188
0.281	1.61418		0.274	1.32686		0.278	1.32643
0.282	1.60597		0.275	1.31862		0.279	1.32097
0.282	1.59779		0.275	1.31032		0.28	1.31558
0.283	1.58963		0.276	1.30205		0.28	1.31011
0.283	1.582		0.277	1.29365		0.281	1.30472
0.284	1.57482		0.277	1.28483		0.281	1.29981
0.285	1.56777		0.278	1.27625		0.282	1.29516
0.285	1.56073		0.278	1.26778		0.283	1.29045
0.286	1.55366		0.279	1.25914		0.283	1.28575
0.287	1.5466		0.28	1.25045		0.284	1.28105
0.287	1.53955		0.28	1.24188		0.284	1.27634
0.288	1.53301		0.281	1.23329		0.285	1.27163
0.288	1.52672		0.281	1.22554		0.286	1.2661
0.289	1.52032		0.282	1.21991		0.286	1.26046
0.29	1.5139		0.283	1.21428		0.287	1.25482
0.29	1.50747		0.283	1.20867		0.288	1.24921
0.291	1.50109		0.284	1.20304		0.288	1.24362
0.291	1.49469		0.284	1.19743		0.289	1.23808
0.292	1.48862		0.285	1.19174		0.289	1.2329
0.293	1.48298		0.286	1.18582		0.29	1.22814
0.293	1.47732		0.286	1.18024		0.291	1.22358
0.294	1.47163		0.287	1.1748		0.291	1.2189
0.295	1.46596		0.287	1.16937		0.292	1.214
0.295	1.46028		0.288	1.16399		0.292	1.20904
0.296	1.45458		0.289	1.15856		0.293	1.20408
0.296	1.44921		0.289	1.15313		0.294	1.19911
0.297	1.44451		0.29	1.14786		0.294	1.19444
0.298	1.44011		0.29	1.14296		0.295	1.19028
0.298	1.43571		0.291	1.13811		0.295	1.18633
0.299	1.4313		0.292	1.13327		0.296	1.18238
0.299	1.42687		0.292	1.12841		0.297	1.17845
0.3	1.42246		0.293	1.12359		0.297	1.17452
0.301	1.41807		0.293	1.11871		0.298	1.17059
0.301	1.41384		0.294	1.11387		0.299	1.16667
0.302	1.40986		0.295	1.10995		0.299	1.16275
0.303	1.40588		0.295	1.10633		0.3	1.15881
0.303	1.4019		0.296	1.10271		0.3	1.15486
0.304	1.39792		0.296	1.09907		0.301	1.15089
0.304	1.39397		0.297	1.09544		0.302	1.14694
0.305	1.38997		0.298	1.09179		0.302	1.14298
0.306	1.38613		0.298	1.08807		0.303	1.13908
0.306	1.38279		0.299	1.0841		0.303	1.13563
0.307	1.37945		0.3	1.08021		0.304	1.13282
0.307	1.3761		0.3	1.07636		0.305	1.13001
0.308	1.37276		0.301	1.0727		0.305	1.12719
0.309	1.36943		0.301	1.06927		0.306	1.12436
0.309	1.36611		0.302	1.06586		0.306	1.12152
0.31	1.36268		0.303	1.0622		0.307	1.11868
0.311	1.35849		0.303	1.05796		0.308	1.11537
0.311	1.35422		0.304	1.05365		0.308	1.11087
0.312	1.34967		0.304	1.04935		0.309	1.10621
0.312	1.34486		0.305	1.04506		0.31	1.10156
0.313	1.33999		0.306	1.04073		0.31	1.0969
0.314	1.33507		0.306	1.03638		0.311	1.09221
0.314	1.33017		0.307	1.03209		0.311	1.08755
0.315	1.32502		0.307	1.02874		0.312	1.083
0.316	1.3197		0.308	1.02618		0.313	1.07868
0.316	1.31434		0.309	1.02364		0.313	1.07402
0.317	1.30899		0.309	1.0211		0.314	1.06934
0.317	1.30363		0.31	1.01858		0.314	1.06464
0.318	1.29829		0.31	1.01606		0.315	1.05997
0.319	1.29294		0.311	1.01319		0.316	1.0553
0.319	1.28769		0.312	1.00878		0.316	1.05087
0.32	1.28317		0.312	1.00408		0.317	1.04732
0.32	1.27889		0.313	0.999396		0.317	1.04398
0.321	1.27463		0.313	0.994706		0.318	1.04062
0.322	1.27037		0.314	0.990039		0.319	1.03723
0.322	1.26609		0.315	0.985401		0.319	1.03388
0.323	1.26182		0.315	0.98098		0.32	1.03052
0.324	1.25791		0.316	0.977657		0.321	1.02734
0.324	1.25483		0.316	0.975635		0.321	1.0246
0.325	1.25209		0.317	0.973627		0.322	1.02157
0.325	1.24935		0.318	0.971617		0.322	1.01856
0.326	1.2466		0.318	0.969604		0.323	1.01555
0.327	1.24386		0.319	0.967603		0.324	1.01253
0.327	1.24112		0.319	0.965534		0.324	1.00951
0.328	1.23791		0.32	0.963059		0.325	1.0065
0.328	1.23403		0.321	0.960257		0.325	1.00316
0.329	1.2299		0.321	0.957396		0.326	0.999137
0.33	1.22576		0.322	0.954578		0.327	0.995133
0.33	1.22163		0.322	0.951733		0.327	0.991146
0.331	1.21748		0.323	0.948882		0.328	0.987157
0.332	1.21333		0.324	0.946		0.328	0.983153
0.332	1.20919		0.324	0.942959		0.329	0.979165
0.333	1.20492		0.325	0.93985		0.33	0.97531
0.333	1.20052		0.325	0.936776		0.33	0.971693
0.334	1.1961		0.326	0.933657		0.331	0.968181
0.335	1.19169		0.327	0.930536		0.332	0.964682
0.335	1.18728		0.327	0.927471		0.332	0.961159
0.336	1.18289		0.328	0.924341		0.333	0.95763
0.336	1.1784		0.328	0.921117		0.333	0.954121
0.337	1.1735		0.329	0.91788		0.334	0.950546
0.338	1.1683		0.33	0.914643		0.335	0.946708
0.338	1.16312		0.33	0.911381		0.335	0.942617
0.339	1.15792		0.331	0.908136		0.336	0.938531
0.34	1.15273		0.331	0.904934		0.336	0.934446
0.34	1.14754		0.332	0.901693		0.337	0.930349
0.341	1.14237		0.333	0.89867		0.338	0.926263
0.341	1.13789		0.333	0.896206		0.338	0.922661
0.342	1.13457		0.334	0.893738		0.339	0.920093
0.343	1.13147		0.334	0.891271		0.339	0.918067
0.343	1.12837		0.335	0.888818		0.34	0.916037
0.344	1.12527		0.336	0.886357		0.341	0.914006
0.344	1.12218		0.336	0.883886		0.341	0.911973
0.345	1.11908		0.337	0.881363		0.342	0.909957
0.346	1.116		0.337	0.878658		0.343	0.908298
0.346	1.113		0.338	0.875925		0.343	0.906994
0.347	1.11013		0.339	0.873223		0.344	0.905622
0.348	1.10726		0.339	0.870501		0.344	0.904177
0.348	1.10438		0.34	0.867765		0.345	0.902622
0.349	1.10151		0.34	0.865012		0.346	0.901017
0.349	1.09865		0.341	0.862287		0.346	0.899392
0.35	1.09567		0.342	0.860043		0.347	0.897744
0.351	1.0923		0.342	0.857765		0.347	0.895897
0.351	1.08877		0.343	0.855504		0.348	0.893724
0.352	1.08523		0.343	0.853237		0.349	0.891545
0.352	1.08168		0.344	0.850963		0.349	0.889373
0.353	1.07813		0.345	0.848688		0.35	0.887199
0.354	1.07459		0.345	0.846317		0.35	0.885027
0.354	1.07087		0.346	0.843437		0.351	0.882904
0.355	1.06635		0.346	0.840386		0.352	0.880946
0.356	1.06127		0.347	0.837346		0.352	0.878991
0.356	1.05622		0.348	0.834284		0.353	0.876981
0.357	1.05112		0.348	0.831234		0.354	0.87498
0.357	1.04606		0.349	0.828189		0.354	0.872991
0.358	1.04097		0.349	0.825497		0.355	0.871028
0.359	1.03603		0.35	0.823827		0.355	0.869058
0.359	1.03223		0.351	0.822324		0.356	0.867799
0.36	1.02975		0.351	0.820821		0.357	0.866737
0.361	1.02729		0.352	0.819309		0.357	0.865669
0.361	1.0248		0.352	0.817804		0.358	0.864598
0.362	1.02232		0.353	0.816309		0.358	0.863534
0.362	1.01984		0.354	0.814451		0.359	0.862465
0.363	1.01737		0.354	0.811856		0.36	0.8614
0.364	1.01477		0.355	0.80969		0.36	0.860116
0.364	1.01173		0.355	0.807554		0.361	0.858643
0.365	1.00868		0.356	0.805272		0.361	0.857126
0.365	1.00544		0.357	0.802851		0.362	0.855598
0.366	1.00204		0.357	0.80042		0.363	0.854081
0.367	0.9986		0.358	0.797983		0.363	0.852545
0.367	0.99515		0.358	0.796055		0.364	0.851024
0.368	0.992005		0.359	0.794718		0.365	0.849622
0.369	0.990218		0.36	0.793475		0.365	0.848507
0.369	0.989123		0.36	0.792237		0.366	0.847468
0.37	0.988032		0.361	0.790992		0.366	0.846434
0.37	0.986939		0.361	0.789755		0.367	0.845399
0.371	0.98585		0.362	0.788515		0.368	0.844357
0.372	0.984753		0.363	0.78702		0.368	0.843328
0.372	0.983637		0.363	0.785314		0.369	0.841791
0.373	0.982033		0.364	0.783573		0.369	0.83919
0.373	0.980055		0.365	0.781837		0.37	0.836359
0.374	0.978078		0.365	0.780099		0.371	0.833526
0.375	0.976105		0.366	0.778346		0.371	0.830698
0.375	0.974138		0.366	0.7766		0.372	0.827875
0.376	0.97216		0.367	0.774874		0.372	0.825056
0.377	0.970179		0.368	0.77316		0.373	0.822271
0.377	0.968379		0.368	0.771447		0.374	0.820061
0.378	0.966803		0.369	0.769729		0.374	0.817892
0.378	0.96528		0.369	0.768012		0.375	0.815699
0.379	0.963749		0.37	0.766287		0.376	0.813548
0.38	0.96222		0.371	0.764557		0.376	0.81137
0.38	0.960698		0.371	0.76297		0.377	0.809208
0.381	0.959167		0.372	0.762443		0.377	0.806949
0.381	0.957311		0.372	0.762375		0.378	0.804653
0.382	0.955122		0.373	0.762308		0.379	0.802325
0.383	0.953036		0.374	0.76224		0.379	0.800034
0.383	0.95096		0.374	0.762173		0.38	0.797752
0.384	0.948882		0.375	0.762105		0.38	0.795435
0.385	0.94681		0.375	0.761885		0.381	0.793126
0.385	0.944732		0.376	0.760214		0.382	0.790935
0.386	0.943071		0.377	0.758098		0.382	0.789891
0.386	0.942274		0.377	0.755994		0.383	0.788993
0.387	0.941754		0.378	0.753886		0.383	0.788094
0.388	0.941233		0.378	0.751787		0.384	0.787187
0.388	0.940714		0.379	0.749681		0.385	0.78628
0.389	0.940194		0.38	0.747582		0.385	0.785379
0.389	0.939675		0.38	0.745412		0.386	0.78449
0.39	0.939239		0.381	0.743236		0.387	0.783688
0.391	0.939001		0.381	0.741066		0.387	0.782918
0.391	0.938763		0.382	0.738903		0.388	0.782148
0.392	0.938524		0.383	0.736725		0.388	0.781376
0.393	0.938284		0.383	0.734547		0.389	0.780612
0.393	0.938044		0.384	0.732372		0.39	0.779841
0.394	0.937805		0.384	0.731434		0.39	0.778949
0.394	0.937508		0.385	0.730633		0.391	0.777624
0.395	0.936992		0.386	0.729832		0.391	0.776274
0.396	0.936378		0.386	0.729031		0.392	0.774913
0.396	0.935763		0.387	0.728228		0.393	0.773559
0.397	0.935148		0.387	0.727425		0.393	0.772199
0.398	0.934537		0.388	0.726627		0.394	0.770841
0.398	0.933925		0.389	0.725617		0.394	0.769402
0.399	0.93319		0.389	0.724584		0.395	0.767729
0.399	0.931544		0.39	0.723557		0.396	0.76608
0.4	0.928584		0.39	0.722526		0.396	0.764528
0.401	0.925633		0.391	0.721489		0.397	0.76306
0.401	0.922669		0.392	0.720458		0.398	0.761581
0.402	0.919711		0.392	0.719428		0.398	0.759982
0.402	0.916739		0.393	0.718622		0.399	0.758311
0.403	0.913838		0.393	0.717908		0.399	0.7574
0.404	0.911433		0.394	0.71719		0.4	0.75702
0.404	0.910395		0.395	0.716479		0.401	0.75668
0.405	0.909356		0.395	0.715762		0.401	0.756337
0.406	0.908316		0.396	0.715045		0.402	0.755996
0.406	0.907283		0.396	0.714308		0.402	0.755655
0.407	0.906245		0.397	0.713317		0.403	0.755313
0.407	0.905189		0.398	0.712192		0.404	0.754507
0.408	0.904066		0.398	0.711064		0.404	0.753608
0.409	0.90267		0.399	0.70994		0.405	0.752704
0.409	0.901261		0.399	0.708817		0.405	0.751809
0.41	0.899849		0.4	0.707687		0.406	0.750911
0.41	0.898455		0.401	0.70652		0.407	0.750013
0.411	0.89704		0.401	0.705025		0.407	0.749113
0.412	0.895635		0.402	0.703023		0.408	0.748375
0.412	0.894155		0.402	0.701032		0.409	0.74803
0.413	0.893414		0.403	0.699028		0.409	0.74772
0.414	0.892833		0.404	0.69703		0.41	0.747408
0.414	0.892252		0.404	0.69503		0.41	0.747096
0.415	0.891676		0.405	0.69308		0.411	0.746785
0.415	0.891097		0.405	0.691783		0.412	0.746472
0.416	0.890518		0.406	0.69183		0.412	0.745905
0.417	0.889953		0.407	0.691876		0.413	0.744242
0.417	0.888284		0.407	0.691922		0.413	0.742479
0.418	0.886208		0.408	0.691966		0.414	0.740709
0.418	0.883986		0.408	0.692006		0.415	0.738928
0.419	0.881638		0.409	0.692048		0.415	0.737168
0.42	0.879195		0.41	0.691954		0.416	0.735379
0.42	0.876734		0.41	0.690378		0.416	0.733606
0.421	0.874273		0.411	0.688715		0.417	0.731843
0.422	0.871609		0.411	0.687043		0.418	0.730062
0.422	0.868649		0.412	0.685359		0.418	0.728295
0.423	0.865615		0.413	0.683668		0.419	0.726525
0.423	0.862591		0.413	0.681972		0.42	0.724765
0.424	0.859561		0.414	0.680392		0.42	0.72297
0.425	0.856524		0.414	0.679102		0.421	0.721113
0.425	0.853497		0.415	0.677819		0.421	0.719548
0.426	0.850615		0.416	0.676543		0.422	0.718033
0.426	0.848099		0.416	0.675271		0.423	0.716521
0.427	0.84583		0.417	0.67401		0.423	0.715001
0.428	0.843561		0.417	0.672754		0.424	0.713486
0.428	0.841293		0.418	0.671113		0.424	0.712003
0.429	0.839022		0.419	0.669174		0.425	0.710862
0.43	0.836758		0.419	0.667216		0.426	0.710513
0.43	0.834674		0.42	0.665257		0.426	0.71025
0.431	0.833272		0.42	0.663312		0.427	0.709985
0.431	0.832494		0.421	0.661375		0.427	0.709723
0.432	0.831716		0.422	0.659447		0.428	0.70946
0.433	0.83094		0.422	0.657385		0.429	0.709198
0.433	0.830165		0.423	0.655191		0.429	0.708557
0.434	0.82939		0.423	0.652954		0.43	0.707308
0.435	0.828524		0.424	0.650695		0.431	0.705996
0.435	0.827383		0.425	0.648453		0.431	0.704688
0.436	0.826139		0.425	0.646216		0.432	0.703375
0.436	0.82489		0.426	0.643968		0.432	0.70207
0.437	0.823644		0.426	0.641916		0.433	0.700764
0.438	0.822399		0.427	0.640107		0.434	0.700094
0.438	0.821155		0.428	0.638355		0.434	0.700019
0.439	0.819927		0.428	0.63661		0.435	0.700002
0.439	0.81865		0.429	0.634845		0.435	0.699984
0.44	0.816904		0.43	0.633078		0.436	0.699966
0.441	0.815087		0.43	0.631326		0.437	0.699949
0.441	0.813263		0.431	0.629535		0.437	0.699931
0.442	0.811434		0.431	0.627727		0.438	0.699175
0.443	0.809611		0.432	0.62594		0.438	0.697869
0.443	0.80779		0.433	0.624124		0.439	0.696469
0.444	0.806103		0.433	0.622333		0.44	0.695074
0.444	0.804884		0.434	0.620544		0.44	0.693674
0.445	0.803656		0.434	0.618741		0.441	0.692276
0.446	0.802441		0.435	0.61706		0.442	0.690881
0.446	0.801216		0.436	0.61563		0.442	0.689962
0.447	0.799992		0.436	0.614239		0.443	0.689498
0.447	0.798767		0.437	0.612837		0.443	0.689107
0.448	0.797542		0.437	0.611449		0.444	0.688715
0.449	0.796663		0.438	0.610049		0.445	0.688322
0.449	0.79577		0.439	0.608663		0.445	0.687931
0.45	0.794876		0.439	0.607415		0.446	0.687537
0.451	0.793988		0.44	0.606201		0.446	0.686667
0.451	0.79309		0.44	0.604987		0.447	0.685038
0.452	0.792198		0.441	0.603796		0.448	0.683381
0.452	0.791313		0.442	0.60259		0.448	0.681725
0.453	0.790492		0.442	0.601381		0.449	0.680076
0.454	0.789822		0.443	0.60018		0.449	0.678499
0.454	0.789155		0.443	0.599006		0.45	0.677029
0.455	0.788491		0.444	0.598227		0.451	0.675718
0.455	0.787822		0.445	0.597495		0.451	0.67471
0.456	0.787148		0.445	0.596766		0.452	0.67373
0.457	0.786482		0.446	0.596041		0.453	0.672723
0.457	0.785922		0.446	0.595317		0.453	0.67171
0.458	0.785524		0.447	0.594582		0.454	0.670687
0.459	0.785137		0.448	0.59375		0.454	0.669667
0.459	0.784749		0.448	0.592		0.455	0.668502
0.46	0.78436		0.449	0.590133		0.456	0.667243
0.46	0.78397		0.449	0.588265		0.456	0.666047
0.461	0.783584		0.45	0.586398		0.457	0.664845
0.462	0.783233		0.451	0.584541		0.457	0.663642
0.462	0.783219		0.451	0.582681		0.458	0.662448
0.463	0.783246		0.452	0.581098		0.459	0.661261
0.463	0.783273		0.452	0.580837		0.459	0.660075
0.464	0.783299		0.453	0.580971		0.46	0.658871
0.465	0.783326		0.454	0.581107		0.46	0.657639
0.465	0.783352		0.454	0.581242		0.461	0.656409
0.466	0.783207		0.455	0.581378		0.462	0.655184
0.467	0.781498		0.455	0.581513		0.462	0.653972
0.467	0.779483		0.456	0.581533		0.463	0.65276
0.468	0.777465		0.457	0.581121		0.464	0.651692
0.468	0.775442		0.457	0.580409		0.464	0.650848
0.469	0.773424		0.458	0.579697		0.465	0.650091
0.47	0.771411		0.458	0.578988		0.465	0.649326
0.47	0.769475		0.459	0.57828		0.466	0.648564
0.471	0.768516		0.46	0.577573		0.467	0.647804
0.472	0.768097		0.46	0.576893		0.467	0.647042
0.472	0.767786		0.461	0.576248		0.468	0.646677
0.473	0.767455		0.461	0.575585		0.468	0.646526
0.473	0.767115		0.462	0.574951		0.469	0.646393
0.474	0.766774		0.463	0.574301		0.47	0.64626
0.475	0.766433		0.463	0.573604		0.47	0.646127
0.475	0.765986		0.464	0.572878		0.471	0.645993
0.476	0.765212		0.464	0.572149		0.471	0.645861
0.476	0.76421		0.465	0.571227		0.472	0.645556
0.477	0.763208		0.466	0.569904		0.473	0.645181
0.478	0.762206		0.466	0.568573		0.473	0.644799
0.478	0.761206		0.467	0.567247		0.474	0.644422
0.479	0.760204		0.467	0.565921		0.475	0.644037
0.48	0.759304		0.468	0.564589		0.475	0.643656
0.48	0.759018		0.469	0.563268		0.476	0.643274
0.481	0.759689		0.469	0.562083		0.476	0.643422
0.481	0.760362		0.47	0.561887		0.477	0.644439
0.482	0.761033		0.47	0.561692		0.478	0.645461
0.483	0.761704		0.471	0.561496		0.478	0.646492
0.483	0.76238		0.472	0.5613		0.479	0.647522
0.484	0.763018		0.472	0.561105		0.479	0.648551
0.484	0.763176		0.473	0.56091		0.48	0.649561
0.485	0.761709		0.473	0.560643		0.481	0.650274
0.486	0.759892		0.474	0.55962		0.481	0.650343
0.486	0.75808		0.475	0.558533		0.482	0.650411
0.487	0.756269		0.475	0.557442		0.482	0.65048
0.488	0.754456		0.476	0.556347		0.483	0.650549
0.488	0.752648		0.476	0.555255		0.484	0.650617
0.489	0.751029		0.477	0.554153		0.484	0.650693
0.489	0.750475		0.478	0.5531		0.485	0.650753
0.49	0.750143		0.478	0.553545		0.486	0.650683
0.491	0.749812		0.479	0.55415		0.486	0.650576
0.491	0.749478		0.479	0.554747		0.487	0.650468
0.492	0.749147		0.48	0.555354		0.487	0.650362
0.492	0.748809		0.481	0.555954		0.488	0.650254
0.493	0.748399		0.481	0.556547		0.489	0.650148
0.494	0.747593		0.482	0.556831		0.489	0.650129
0.494	0.746891		0.482	0.555574		0.49	0.650301
0.495	0.746188		0.483	0.554036		0.49	0.650475
0.496	0.745495		0.484	0.552508		0.491	0.65065
0.496	0.744798		0.484	0.550974		0.492	0.650824
0.497	0.744097		0.485	0.549436		0.492	0.650999
0.497	0.74351		0.485	0.547917		0.493	0.651173
0.498	0.743539		0.486	0.546555		0.493	0.650882
0.499	0.742691		0.487	0.545658		0.494	0.649865
0.499	0.741823		0.487	0.545019		0.495	0.648684
0.5	0.740947		0.488	0.544381		0.495	0.647499
0.5	0.740089		0.488	0.54374		0.496	0.646312
0.501	0.739215		0.489	0.543101		0.497	0.645128
0.502	0.738348		0.49	0.542449		0.497	0.643943
0.502	0.737043		0.49	0.541773		0.498	0.642845
0.503	0.735558		0.491	0.541206		0.498	0.641799
0.504	0.734072		0.491	0.540828		0.499	0.640747
0.504	0.73257		0.492	0.54045		0.5	0.639697
0.505	0.731076		0.493	0.540077		0.5	0.638649
0.505	0.729579		0.493	0.539701		0.501	0.637597
0.506	0.728076		0.494	0.539418		0.501	0.636556
0.507	0.726875		0.495	0.539639		0.502	0.635578
0.507	0.72596		0.495	0.540367		0.503	0.634663
0.508	0.725091		0.496	0.54117		0.503	0.633811
0.509	0.724226		0.496	0.541971		0.504	0.632996
0.509	0.723356		0.497	0.542772		0.504	0.632164
0.51	0.722487		0.498	0.543576		0.505	0.631279
0.51	0.721619		0.498	0.544223		0.506	0.630354
0.511	0.7206		0.499	0.544043		0.506	0.629596
0.512	0.718202		0.499	0.543115		0.507	0.62913
0.512	0.715446		0.5	0.542007		0.508	0.62876
0.513	0.712703		0.501	0.540902		0.508	0.628391
0.513	0.709957		0.501	0.539795		0.509	0.628023
0.514	0.707199		0.502	0.538694		0.509	0.627654
0.515	0.704444		0.502	0.537678		0.51	0.627284
0.515	0.701744		0.503	0.537585		0.511	0.626763
0.516	0.700742		0.504	0.538032		0.511	0.62627
0.517	0.700667		0.504	0.538551		0.512	0.625894
0.517	0.70071		0.505	0.539073		0.512	0.625518
0.518	0.700753		0.505	0.539592		0.513	0.625142
0.518	0.700796		0.506	0.540114		0.514	0.624767
0.519	0.70084		0.507	0.540635		0.514	0.624392
0.52	0.700883		0.507	0.54112		0.515	0.623972
0.52	0.699866		0.508	0.541496		0.515	0.623314
0.521	0.698148		0.508	0.541856		0.516	0.622526
0.521	0.696353		0.509	0.542217		0.517	0.621739
0.522	0.694566		0.51	0.542576		0.517	0.620951
0.523	0.692777		0.51	0.542938		0.518	0.620159
0.523	0.691001		0.511	0.543297		0.519	0.619366
0.524	0.689307		0.511	0.542866		0.519	0.61846
0.525	0.687796		0.512	0.542892		0.52	0.617536
0.525	0.686383		0.513	0.542919		0.52	0.616663
0.526	0.684854		0.513	0.542946		0.521	0.615806
0.526	0.683237		0.514	0.542973		0.522	0.614946
0.527	0.681597		0.514	0.542998		0.522	0.614087
0.528	0.679948		0.515	0.543022		0.523	0.613229
0.528	0.678305		0.516	0.543269		0.523	0.612221
0.529	0.676713		0.516	0.543413		0.524	0.61112
0.529	0.675525		0.517	0.543544		0.525	0.610079
0.53	0.675077		0.517	0.54368		0.525	0.609049
0.531	0.674632		0.518	0.543816		0.526	0.608015
0.531	0.674184		0.519	0.543953		0.526	0.606988
0.532	0.673736		0.519	0.544091		0.527	0.605957
0.533	0.673288		0.52	0.543729		0.528	0.60476
0.533	0.672925		0.52	0.543277		0.528	0.603575
0.534	0.673379		0.521	0.542818		0.529	0.602583
0.534	0.674548		0.522	0.542366		0.53	0.601584
0.535	0.675719		0.522	0.541913		0.53	0.600589
0.536	0.67689		0.523	0.541462		0.531	0.599597
0.536	0.678066		0.523	0.54111		0.531	0.598628
0.537	0.679235		0.524	0.540735		0.532	0.597896
0.537	0.680395		0.525	0.54007		0.533	0.597619
0.538	0.681102		0.525	0.539411		0.533	0.597239
0.539	0.681173		0.526	0.538753		0.534	0.596861
0.539	0.681245		0.526	0.538099		0.534	0.59648
0.54	0.681317		0.527	0.537446		0.535	0.596099
0.541	0.681389		0.528	0.536796		0.536	0.595707
0.541	0.681461		0.528	0.536514		0.536	0.595065
0.542	0.681534		0.529	0.536519		0.537	0.593813
0.542	0.681603		0.529	0.536525		0.537	0.592373
0.543	0.682164		0.53	0.53653		0.538	0.590938
0.544	0.682747		0.531	0.536536		0.539	0.589504
0.544	0.683328		0.531	0.536541		0.539	0.588072
0.545	0.68391		0.532	0.53637		0.54	0.586642
0.545	0.684492		0.532	0.535172		0.541	0.585445
0.546	0.685069		0.533	0.533356		0.541	0.584626
0.547	0.685485		0.534	0.531542		0.542	0.583946
0.547	0.684394		0.534	0.529726		0.542	0.583267
0.548	0.683126		0.535	0.527905		0.543	0.582587
0.549	0.681866		0.535	0.526083		0.544	0.581908
0.549	0.680602		0.536	0.524433		0.544	0.5812
0.55	0.67933		0.537	0.523652		0.545	0.580241
0.55	0.678062		0.537	0.523216		0.545	0.579193
0.551	0.676798		0.538	0.522776		0.546	0.578156
0.552	0.677158		0.538	0.522336		0.547	0.577123
0.552	0.678126		0.539	0.521892		0.547	0.576095
0.553	0.67916		0.54	0.521456		0.548	0.575062
0.554	0.680193		0.54	0.521012		0.548	0.574029
0.554	0.681226		0.541	0.520846		0.549	0.573121
0.555	0.682268		0.541	0.520598		0.55	0.572383
0.555	0.683303		0.542	0.520334		0.55	0.571659
0.556	0.683638		0.543	0.520065		0.551	0.570941
0.557	0.683428		0.543	0.519799		0.552	0.570223
0.557	0.683114		0.544	0.519534		0.552	0.569508
0.558	0.682797		0.544	0.519266		0.553	0.568795
0.558	0.682481		0.545	0.518769		0.553	0.568592
0.559	0.682167		0.546	0.518301		0.554	0.568653
0.56	0.68185		0.546	0.517828		0.555	0.568714
0.56	0.682		0.547	0.517355		0.555	0.568775
0.561	0.682644		0.547	0.516881		0.556	0.568836
0.562	0.683423		0.548	0.516411		0.556	0.568894
0.562	0.684201		0.549	0.515903		0.557	0.568943
0.563	0.684977		0.549	0.515163		0.558	0.568688
0.563	0.685751		0.55	0.514334		0.558	0.568525
0.564	0.68653		0.55	0.513514		0.559	0.568365
0.565	0.686517		0.551	0.512686		0.559	0.568201
0.565	0.68527		0.552	0.511864		0.56	0.568035
0.566	0.683556		0.552	0.511028		0.561	0.567869
0.566	0.681844		0.553	0.510153		0.561	0.567711
0.567	0.680135		0.553	0.509087		0.562	0.567689
0.568	0.678424		0.554	0.507882		0.563	0.567956
0.568	0.676711		0.555	0.50668		0.563	0.568222
0.569	0.675433		0.555	0.505466		0.564	0.568488
0.57	0.675034		0.556	0.504256		0.564	0.568753
0.57	0.675068		0.556	0.503043		0.565	0.569017
0.571	0.675102		0.557	0.501973		0.566	0.569333
0.571	0.675135		0.558	0.501322		0.566	0.570211
0.572	0.675169		0.558	0.500961		0.567	0.57147
0.573	0.675203		0.559	0.500597		0.567	0.572732
0.573	0.675127		0.56	0.500235		0.568	0.573982
0.574	0.674695		0.56	0.499873		0.569	0.575232
0.574	0.674013		0.561	0.499511		0.569	0.576482
0.575	0.673333		0.561	0.499191		0.57	0.577698
0.576	0.672653		0.562	0.49905		0.57	0.578683
0.576	0.671972		0.563	0.499035		0.571	0.579595
0.577	0.671305		0.563	0.49902		0.572	0.580505
0.578	0.670729		0.564	0.499005		0.572	0.581427
0.578	0.670512		0.564	0.49899		0.573	0.582338
0.579	0.671046		0.565	0.498974		0.574	0.583249
0.579	0.671618		0.566	0.49876		0.574	0.5842
0.58	0.672215		0.566	0.49766		0.575	0.585235
0.581	0.672815		0.567	0.496127		0.575	0.58626
0.581	0.673416		0.567	0.494609		0.576	0.587279
0.582	0.674014		0.568	0.493173		0.577	0.588298
0.582	0.674616		0.569	0.491822		0.577	0.589316
0.583	0.673909		0.569	0.490482		0.578	0.590344
0.584	0.672864		0.57	0.488965		0.578	0.591375
0.584	0.671814		0.57	0.48707		0.579	0.59285
0.585	0.67076		0.571	0.485012		0.58	0.594443
0.586	0.669712		0.572	0.483054		0.58	0.596043
0.586	0.668665		0.572	0.481094		0.581	0.597633
0.587	0.667613		0.573	0.479135		0.581	0.599233
0.587	0.667269		0.573	0.477175		0.582	0.600843
0.588	0.667387		0.574	0.475282		0.583	0.602356
0.589	0.667538		0.575	0.473745		0.583	0.603153
0.589	0.667691		0.575	0.472605		0.584	0.603089
0.59	0.667842		0.576	0.471453		0.585	0.603025
0.591	0.667994		0.576	0.470308		0.585	0.602961
0.591	0.668145		0.577	0.469166		0.586	0.602897
0.592	0.667504		0.578	0.468026		0.586	0.602834
0.592	0.666328		0.578	0.466886		0.587	0.603024
0.593	0.665094		0.579	0.466202		0.588	0.604316
0.594	0.663845		0.579	0.466399		0.588	0.606588
0.594	0.662602		0.58	0.466798		0.589	0.608892
0.595	0.661367		0.581	0.467199		0.589	0.611175
0.595	0.660121		0.581	0.467598		0.59	0.613489
0.596	0.659414		0.582	0.467998		0.591	0.615775
0.597	0.659216		0.582	0.468401		0.591	0.61789
0.597	0.659117		0.583	0.468738		0.592	0.61892
0.598	0.659018		0.584	0.468933		0.592	0.61928
0.599	0.658918		0.584	0.469066		0.593	0.619639
0.599	0.658819		0.585	0.469199		0.594	0.619999
0.6	0.65872		0.585	0.469332		0.594	0.620359
0.6	0.658411		0.586	0.469465		0.595	0.620718
0.601	0.657819		0.587	0.469598		0.596	0.621028
0.602	0.65715		0.587	0.469904		0.596	0.619832
0.602	0.656481		0.588	0.470384		0.597	0.617855
0.603	0.655807		0.588	0.470871		0.597	0.61578
0.603	0.65514		0.589	0.471361		0.598	0.613702
0.604	0.654467		0.59	0.471852		0.599	0.61164
0.605	0.65421		0.59	0.472341		0.599	0.609575
0.605	0.654814		0.591	0.472829		0.6	0.607529
0.606	0.655763		0.591	0.473502		0.6	0.606741
0.607	0.656704		0.592	0.474405		0.601	0.607003
0.607	0.657644		0.593	0.475378		0.602	0.60727
0.608	0.658593		0.593	0.476344		0.602	0.607534
0.608	0.659533		0.594	0.477311		0.603	0.607796
0.609	0.659978		0.594	0.478286		0.603	0.608061
0.61	0.659338		0.595	0.479249		0.604	0.608315
0.61	0.658193		0.596	0.479187		0.605	0.608432
0.611	0.657053		0.596	0.478569		0.605	0.608107
0.611	0.655915		0.597	0.477893		0.606	0.607783
0.612	0.654773		0.597	0.477217		0.607	0.60746
0.613	0.653627		0.598	0.476542		0.607	0.607137
0.613	0.652527		0.599	0.47588		0.608	0.606813
0.614	0.65186		0.599	0.475206		0.608	0.606401
0.615	0.651529		0.6	0.475517		0.609	0.605758
0.615	0.651201		0.6	0.476958		0.61	0.605159
0.616	0.650873		0.601	0.478427		0.61	0.604597
0.616	0.650542		0.602	0.479884		0.611	0.604063
0.617	0.650212		0.602	0.481344		0.611	0.603514
0.618	0.649883		0.603	0.482809		0.612	0.602921
0.618	0.64913		0.603	0.484264		0.613	0.602307
0.619	0.647874		0.604	0.485665		0.613	0.601841
0.619	0.646601		0.605	0.486507		0.614	0.602185
0.62	0.645331		0.605	0.487355		0.614	0.60253
0.621	0.644056		0.606	0.488206		0.615	0.602874
0.621	0.642779		0.606	0.489055		0.616	0.603219
0.622	0.641505		0.607	0.489908		0.616	0.603563
0.623	0.640424		0.608	0.490739		0.617	0.603887
0.623	0.639681		0.608	0.491357		0.618	0.60385
0.624	0.639015		0.609	0.491546		0.618	0.602556
0.624	0.63835		0.609	0.491735		0.619	0.601265
0.625	0.637683		0.61	0.491924		0.619	0.599977
0.626	0.637016		0.611	0.492115		0.62	0.598695
0.626	0.636351		0.611	0.492304		0.621	0.597409
0.627	0.635783		0.612	0.492489		0.621	0.596125
0.628	0.6355		0.612	0.492617		0.622	0.594878
0.628	0.635419		0.613	0.492671		0.622	0.593724
0.629	0.635337		0.614	0.492718		0.623	0.592494
0.629	0.635256		0.614	0.492765		0.624	0.591257
0.63	0.635174		0.615	0.492812		0.624	0.590019
0.631	0.635096		0.615	0.492859		0.625	0.588784
0.631	0.634946		0.616	0.492906		0.625	0.587544
0.632	0.634416		0.617	0.492393		0.626	0.586689
0.632	0.6334		0.617	0.491419		0.627	0.586866
0.633	0.63231		0.618	0.490399		0.627	0.587402
0.634	0.631201		0.618	0.489382		0.628	0.58794
0.634	0.63008		0.619	0.488363		0.629	0.588475
0.635	0.628967		0.62	0.487341		0.629	0.589011
0.636	0.627853		0.62	0.486325		0.63	0.58955
0.636	0.626542		0.621	0.484885		0.63	0.589661
0.637	0.625088		0.621	0.483319		0.631	0.588803
0.637	0.62361		0.622	0.481823		0.632	0.587453
0.638	0.622137		0.623	0.480317		0.632	0.586101
0.639	0.620661		0.623	0.478719		0.633	0.584745
0.639	0.619184		0.624	0.477023		0.633	0.58339
0.64	0.61771		0.625	0.475282		0.634	0.58203
0.64	0.616842		0.625	0.474297		0.635	0.580739
0.641	0.616988		0.626	0.474254		0.635	0.579684
0.642	0.617387		0.626	0.474431		0.636	0.578725
0.642	0.617787		0.627	0.47461		0.636	0.577766
0.643	0.618189		0.628	0.474788		0.637	0.576804
0.644	0.61859		0.628	0.474965		0.638	0.575841
0.644	0.618989		0.629	0.475143		0.638	0.57488
0.645	0.619363		0.629	0.474229		0.639	0.573606
0.645	0.61949		0.63	0.472927		0.64	0.571185
0.646	0.619519		0.631	0.471644		0.64	0.568546
0.647	0.619547		0.631	0.470368		0.641	0.565981
0.647	0.619575		0.632	0.469095		0.641	0.563346
0.648	0.619604		0.632	0.467831		0.642	0.560728
0.648	0.619632		0.633	0.466616		0.643	0.558108
0.649	0.619661		0.634	0.465531		0.643	0.555604
0.65	0.620257		0.634	0.464431		0.644	0.553604
0.65	0.621176		0.635	0.463332		0.644	0.551599
0.651	0.622098		0.635	0.462235		0.645	0.549608
0.652	0.623018		0.636	0.46114		0.646	0.547611
0.652	0.623939		0.637	0.460046		0.646	0.545624
0.653	0.62486		0.637	0.459036		0.647	0.543629
0.653	0.625777		0.638	0.458197		0.647	0.5419
0.654	0.626582		0.638	0.457436		0.648	0.541172
0.655	0.627286		0.639	0.45668		0.649	0.540552
0.655	0.627968		0.64	0.455927		0.649	0.539932
0.656	0.628647		0.64	0.45517		0.65	0.539311
0.656	0.629331		0.641	0.45441		0.651	0.538693
0.657	0.630014		0.641	0.453851		0.651	0.538073
0.658	0.630695		0.642	0.453606		0.652	0.537747
0.658	0.63111		0.643	0.45346		0.652	0.537939
0.659	0.631096		0.643	0.453314		0.653	0.538213
0.66	0.630906		0.644	0.453167		0.654	0.538487
0.66	0.630717		0.644	0.45302		0.654	0.538761
0.661	0.630527		0.645	0.452873		0.655	0.539036
0.661	0.63034		0.646	0.452395		0.655	0.53931
0.662	0.630153		0.646	0.451885		0.656	0.539474
0.663	0.630132		0.647	0.451479		0.657	0.539522
0.663	0.63049		0.647	0.451069		0.657	0.539549
0.664	0.631075		0.648	0.450662		0.658	0.539576
0.665	0.63166		0.649	0.450258		0.658	0.539603
0.665	0.632244		0.649	0.449852		0.659	0.53963
0.666	0.63283		0.65	0.449161		0.66	0.539657
0.666	0.633413		0.65	0.448428		0.66	0.539954
0.667	0.633985		0.651	0.447703		0.661	0.540444
0.668	0.634527		0.652	0.446984		0.662	0.540966
0.668	0.635064		0.652	0.446266		0.662	0.541489
0.669	0.635597		0.653	0.445541		0.663	0.542008
0.669	0.636134		0.653	0.444829		0.663	0.542495
0.67	0.636672		0.654	0.444275		0.664	0.542954
0.671	0.637207		0.655	0.443841		0.665	0.543311
0.671	0.637742		0.655	0.443406		0.665	0.543543
0.672	0.638258		0.656	0.44297		0.666	0.543726
0.673	0.63874		0.656	0.442537		0.666	0.543913
0.673	0.639219		0.657	0.442103		0.667	0.544102
0.674	0.639698		0.658	0.441692		0.668	0.544291
0.674	0.640177		0.658	0.441625		0.668	0.54448
0.675	0.640657		0.659	0.442491		0.669	0.544595
0.676	0.641126		0.659	0.443402		0.669	0.545425
0.676	0.641391		0.66	0.444309		0.67	0.546316
0.677	0.64098		0.661	0.445215		0.671	0.547209
0.677	0.640568		0.661	0.446124		0.671	0.548097
0.678	0.640157		0.662	0.446956		0.672	0.548986
0.679	0.639746		0.662	0.447268		0.673	0.549901
0.679	0.639335		0.663	0.446698		0.673	0.550848
0.68	0.638922		0.664	0.446065		0.674	0.551693
0.681	0.638573		0.664	0.445428		0.674	0.55253
0.681	0.638658		0.665	0.444793		0.675	0.553364
0.682	0.639081		0.665	0.444155		0.676	0.554195
0.682	0.639504		0.666	0.443508		0.676	0.555022
0.683	0.639929		0.667	0.442772		0.677	0.555802
0.684	0.640349		0.667	0.441893		0.677	0.555782
0.684	0.64075		0.668	0.440985		0.678	0.555101
0.685	0.641126		0.668	0.440079		0.679	0.554368
0.685	0.641065		0.669	0.439173		0.679	0.553636
0.686	0.640534		0.67	0.438263		0.68	0.552903
0.687	0.639837		0.67	0.43739		0.68	0.552168
0.687	0.639131		0.671	0.436651		0.681	0.551431
0.688	0.638424		0.671	0.435903		0.682	0.550427
0.689	0.637716		0.672	0.435075		0.682	0.549271
0.689	0.637006		0.673	0.434247		0.683	0.548106
0.69	0.636156		0.673	0.433418		0.684	0.546942
0.69	0.634723		0.674	0.43259		0.684	0.545778
0.691	0.632989		0.674	0.431785		0.685	0.544605
0.692	0.631252		0.675	0.431492		0.685	0.543361
0.692	0.629516		0.676	0.431628		0.686	0.541652
0.693	0.627786		0.676	0.431871		0.687	0.53986
0.693	0.626057		0.677	0.432129		0.687	0.53807
0.694	0.624388		0.677	0.432399		0.688	0.536288
0.695	0.622983		0.678	0.432671		0.688	0.534498
0.695	0.621751		0.679	0.432945		0.689	0.532715
0.696	0.620514		0.679	0.433016		0.69	0.530976
0.697	0.619278		0.68	0.432778		0.69	0.529478
0.697	0.618043		0.68	0.432711		0.691	0.5278
0.698	0.616809		0.681	0.432644		0.691	0.526103
0.698	0.615538		0.682	0.432577		0.692	0.524411
0.699	0.614072		0.682	0.43251		0.693	0.522718
0.7	0.612445		0.683	0.432443		0.693	0.521017
0.7	0.610813		0.683	0.43254		0.694	0.519552
0.701	0.609182		0.684	0.432873		0.695	0.519642
0.702	0.607549		0.685	0.433236		0.695	0.520214
0.702	0.605917		0.685	0.4336		0.696	0.520786
0.703	0.604294		0.686	0.433964		0.696	0.521355
0.703	0.602873		0.686	0.434329		0.697	0.521927
0.704	0.601731		0.687	0.434694		0.698	0.522493
0.705	0.600608		0.688	0.434703		0.698	0.522724
0.705	0.599479		0.688	0.433853		0.699	0.522085
0.706	0.598355		0.689	0.4325		0.699	0.521427
0.706	0.597235		0.69	0.431147		0.7	0.520766
0.707	0.596114		0.69	0.429792		0.701	0.52011
0.708	0.595261		0.691	0.428432		0.701	0.51945
0.708	0.594937		0.691	0.42707		0.702	0.518788
0.709	0.594706		0.692	0.426257		0.702	0.518074
0.71	0.594475		0.693	0.42673		0.703	0.517227
0.71	0.594245		0.693	0.427837		0.704	0.516306
0.711	0.594013		0.694	0.428941		0.704	0.515381
0.711	0.593782		0.694	0.430049		0.705	0.514455
0.712	0.593668		0.695	0.431154		0.706	0.513529
0.713	0.593834		0.696	0.432263		0.706	0.512599
0.713	0.59402		0.696	0.433166		0.707	0.511892
0.714	0.594206		0.697	0.433825		0.707	0.511546
0.714	0.594392		0.697	0.434427		0.708	0.51134
0.715	0.594579		0.698	0.435026		0.709	0.511135
0.716	0.594764		0.699	0.435627		0.709	0.510929
0.716	0.594974		0.699	0.43623		0.71	0.510723
0.717	0.595314		0.7	0.436831		0.71	0.510518
0.718	0.595857		0.7	0.437269		0.711	0.510196
0.718	0.5964		0.701	0.436889		0.712	0.509661
0.719	0.59694		0.702	0.436403		0.712	0.509065
0.719	0.597482		0.702	0.435922		0.713	0.508469
0.72	0.598022		0.703	0.435438		0.713	0.507874
0.721	0.598563		0.703	0.434955		0.714	0.507279
0.721	0.599151		0.704	0.434467		0.715	0.506679
0.722	0.600123		0.705	0.433604		0.715	0.506177
0.722	0.601093		0.705	0.431654		0.716	0.506385
0.723	0.602069		0.706	0.429722		0.717	0.506719
0.724	0.603043		0.706	0.42777		0.717	0.507031
0.724	0.604016		0.707	0.42582		0.718	0.507332
0.725	0.605007		0.708	0.423885		0.718	0.507643
0.726	0.606211		0.708	0.421994		0.719	0.507974
0.726	0.607931		0.709	0.420732		0.72	0.508297
0.727	0.609654		0.709	0.421034		0.72	0.508292
0.727	0.611354		0.71	0.421418		0.721	0.508006
0.728	0.613077		0.711	0.421801		0.721	0.507719
0.729	0.614795		0.711	0.422185		0.722	0.507431
0.729	0.616521		0.712	0.422567		0.723	0.507143
0.73	0.618144		0.712	0.423002		0.723	0.506857
0.73	0.619521		0.713	0.42351		0.724	0.50657
0.731	0.620915		0.714	0.423896		0.724	0.506283
0.732	0.622305		0.714	0.424143		0.725	0.505911
0.732	0.623686		0.715	0.424389		0.726	0.505489
0.733	0.62507		0.715	0.424635		0.726	0.505067
0.734	0.626464		0.716	0.424882		0.727	0.504646
0.734	0.627506		0.717	0.425058		0.728	0.504226
0.735	0.626865		0.717	0.425178		0.728	0.503805
0.735	0.626125		0.718	0.42551		0.729	0.504197
0.736	0.625385		0.718	0.425982		0.729	0.505237
0.737	0.624644		0.719	0.42645		0.73	0.506367
0.737	0.623917		0.72	0.426921		0.731	0.507499
0.738	0.623237		0.72	0.42739		0.731	0.508634
0.738	0.622827		0.721	0.427876		0.732	0.509774
0.739	0.62307		0.721	0.428001		0.732	0.510916
0.74	0.62358		0.722	0.427475		0.733	0.512072
0.74	0.624047		0.723	0.426789		0.734	0.513247
0.741	0.624519		0.723	0.426103		0.734	0.514429
0.742	0.624992		0.724	0.425416		0.735	0.515618
0.742	0.625465		0.724	0.424731		0.735	0.516796
0.743	0.625876		0.725	0.424078		0.736	0.517978
0.743	0.625529		0.726	0.424021		0.737	0.51917
0.744	0.624203		0.726	0.424316		0.737	0.520114
0.745	0.622648		0.727	0.424641		0.738	0.520855
0.745	0.621096		0.727	0.424965		0.739	0.521558
0.746	0.619548		0.728	0.425279		0.739	0.522262
0.747	0.617998		0.729	0.425572		0.74	0.522968
0.747	0.616471		0.729	0.425792		0.74	0.523676
0.748	0.615424		0.73	0.425604		0.741	0.524381
0.748	0.615134		0.73	0.425471		0.742	0.525322
0.749	0.615037		0.731	0.425418		0.742	0.526818
0.75	0.614939		0.732	0.425364		0.743	0.528338
0.75	0.614842		0.732	0.425309		0.743	0.529853
0.751	0.614744		0.733	0.425254		0.744	0.531363
0.751	0.614647		0.733	0.425209		0.745	0.53287
0.752	0.614666		0.734	0.425784		0.745	0.534375
0.753	0.615022		0.735	0.42716		0.746	0.535686
0.753	0.615608		0.735	0.428522		0.746	0.536397
0.754	0.616194		0.736	0.429889		0.747	0.537107
0.755	0.61678		0.736	0.43125		0.748	0.537817
0.755	0.617365		0.737	0.432595		0.748	0.538527
0.756	0.617949		0.738	0.43387		0.749	0.539235
0.756	0.618281		0.738	0.434591		0.75	0.539931
0.757	0.617664		0.739	0.434841		0.75	0.540752
0.758	0.616317		0.739	0.435088		0.751	0.541935
0.758	0.61497		0.74	0.435334		0.751	0.543121
0.759	0.613625		0.741	0.43558		0.752	0.544307
0.759	0.612281		0.741	0.435825		0.753	0.545489
0.76	0.610943		0.742	0.436218		0.753	0.546673
0.761	0.609659		0.742	0.436701		0.754	0.547854
0.761	0.608716		0.743	0.437185		0.754	0.548351
0.762	0.608137		0.744	0.437667		0.755	0.547939
0.763	0.607556		0.744	0.438151		0.756	0.547505
0.763	0.606978		0.745	0.438634		0.756	0.547073
0.764	0.606402		0.745	0.439118		0.757	0.546642
0.764	0.605822		0.746	0.439358		0.757	0.546211
0.765	0.605271		0.747	0.439086		0.758	0.545781
0.766	0.605084		0.747	0.438662		0.759	0.545561
0.766	0.606073		0.748	0.438242		0.759	0.545599
0.767	0.60706		0.748	0.43782		0.76	0.545706
0.767	0.608046		0.749	0.437393		0.761	0.545812
0.768	0.609031		0.75	0.436969		0.761	0.545919
0.769	0.610016		0.75	0.43678		0.762	0.546025
0.769	0.610984		0.751	0.437513		0.762	0.546131
0.77	0.611664		0.751	0.438366		0.763	0.545814
0.771	0.611185		0.752	0.439221		0.764	0.545143
0.771	0.610706		0.753	0.44008		0.764	0.544413
0.772	0.61023		0.753	0.440944		0.765	0.543676
0.772	0.609753		0.754	0.441797		0.765	0.542945
0.773	0.609274		0.755	0.442317		0.766	0.542209
0.774	0.608796		0.755	0.441612		0.767	0.541475
0.774	0.608115		0.756	0.440895		0.767	0.540947
0.775	0.607611		0.756	0.440188		0.768	0.540567
0.775	0.607113		0.757	0.43948		0.768	0.540202
0.776	0.606611		0.758	0.438767		0.769	0.539837
0.777	0.606107		0.758	0.438074		0.77	0.539476
0.777	0.605607		0.759	0.437871		0.77	0.539138
0.778	0.605104		0.759	0.439033		0.771	0.538818
0.779	0.604512		0.76	0.440201		0.772	0.538132
0.779	0.603324		0.761	0.441362		0.772	0.536812
0.78	0.602105		0.761	0.442528		0.773	0.535179
0.78	0.600883		0.762	0.443696		0.773	0.533506
0.781	0.599667		0.762	0.444855		0.774	0.531822
0.782	0.598446		0.763	0.445843		0.775	0.530121
0.782	0.597226		0.764	0.446548		0.775	0.528421
0.783	0.59593		0.764	0.447225		0.776	0.526861
0.784	0.594457		0.765	0.447902		0.776	0.526139
0.784	0.592945		0.765	0.448578		0.777	0.525439
0.785	0.591436		0.766	0.449259		0.778	0.524748
0.785	0.589929		0.767	0.449935		0.778	0.524055
0.786	0.58841		0.767	0.450511		0.779	0.523366
0.787	0.586902		0.768	0.450977		0.779	0.522725
0.787	0.585417		0.768	0.451412		0.78	0.5221
0.788	0.584812		0.769	0.451849		0.781	0.521301
0.788	0.584553		0.77	0.452286		0.781	0.520505
0.789	0.584328		0.77	0.452722		0.782	0.519713
0.79	0.584103		0.771	0.453158		0.783	0.518929
0.79	0.583879		0.771	0.45289		0.783	0.518141
0.791	0.583663		0.772	0.451822		0.784	0.517274
0.792	0.58346		0.773	0.450558		0.784	0.516159
0.792	0.58311		0.773	0.449296		0.785	0.514912
0.793	0.582605		0.774	0.448037		0.786	0.513679
0.793	0.582031		0.774	0.446778		0.786	0.512455
0.794	0.581436		0.775	0.445508		0.787	0.511233
0.795	0.580842		0.776	0.444963		0.787	0.510004
0.795	0.580245		0.776	0.445696		0.788	0.508814
0.796	0.579649		0.777	0.446585		0.789	0.507915
0.796	0.579159		0.777	0.44747		0.789	0.507167
0.797	0.579004		0.778	0.448354		0.79	0.506413
0.798	0.579095		0.779	0.449246		0.79	0.505653
0.798	0.579186		0.779	0.450125		0.791	0.504898
0.799	0.579278		0.78	0.45066		0.792	0.504142
0.8	0.579368		0.78	0.449952		0.792	0.503383
0.8	0.579459		0.781	0.44924		0.793	0.502965
0.801	0.579522		0.782	0.448564		0.794	0.50289
0.801	0.579352		0.782	0.447931		0.794	0.502895
0.802	0.578718		0.783	0.447313		0.795	0.502899
0.803	0.578087		0.783	0.446671		0.795	0.502904
0.803	0.577449		0.784	0.446199		0.796	0.502909
0.804	0.576815		0.785	0.446667		0.797	0.502914
0.804	0.576179		0.785	0.447501		0.797	0.502722
0.805	0.575604		0.786	0.448337		0.798	0.502341
0.806	0.575375		0.786	0.449173		0.798	0.501923
0.806	0.575515		0.787	0.450008		0.799	0.501504
0.807	0.575681		0.788	0.450844		0.8	0.501085
0.808	0.575846		0.788	0.45168		0.8	0.500667
0.808	0.576012		0.789	0.451658		0.801	0.500253
0.809	0.576177		0.789	0.451419		0.801	0.500263
0.809	0.576346		0.79	0.451179		0.802	0.500743
0.81	0.576538		0.791	0.450941		0.803	0.501242
0.811	0.576666		0.791	0.450703		0.803	0.501737
0.811	0.576773		0.792	0.450465		0.804	0.502233
0.812	0.576879		0.792	0.45016		0.805	0.50273
0.812	0.576986		0.793	0.449421		0.805	0.503143
0.813	0.577092		0.794	0.44859		0.806	0.50253
0.814	0.577204		0.794	0.447758		0.806	0.501552
0.814	0.577385		0.795	0.446923		0.807	0.500561
0.815	0.577561		0.795	0.446086		0.808	0.499565
0.816	0.577681		0.796	0.445248		0.808	0.498574
0.816	0.577804		0.797	0.444435		0.809	0.497586
0.817	0.577927		0.797	0.443967		0.809	0.496698
0.817	0.578048		0.798	0.44355		0.81	0.496212
0.818	0.578169		0.798	0.443135		0.811	0.495595
0.819	0.578254		0.799	0.442719		0.811	0.494977
0.819	0.578122		0.8	0.442301		0.812	0.494349
0.82	0.57814		0.8	0.44188		0.812	0.493727
0.821	0.578164		0.801	0.441468		0.813	0.493107
0.821	0.578187		0.801	0.44135		0.814	0.492615
0.822	0.57821		0.802	0.441381		0.814	0.492695
0.822	0.578233		0.803	0.441412		0.815	0.49331
0.823	0.578256		0.803	0.441444		0.816	0.493925
0.824	0.578297		0.804	0.441475		0.816	0.494547
0.824	0.577806		0.804	0.441506		0.817	0.495168
0.825	0.577263		0.805	0.441448		0.817	0.495787
0.825	0.576713		0.806	0.440997		0.818	0.496365
0.826	0.576166		0.806	0.440358		0.819	0.496627
0.827	0.575622		0.807	0.43972		0.819	0.496535
0.827	0.575072		0.807	0.43908		0.82	0.496443
0.828	0.574379		0.808	0.438441		0.82	0.496352
0.829	0.57356		0.809	0.437802		0.821	0.49626
0.829	0.572724		0.809	0.437282		0.822	0.496169
0.83	0.571883		0.81	0.43701		0.822	0.496141
0.83	0.571043		0.81	0.436838		0.823	0.496312
0.831	0.570203		0.811	0.436666		0.823	0.496606
0.832	0.569365		0.812	0.436495		0.824	0.496882
0.832	0.568585		0.812	0.436322		0.825	0.49715
0.833	0.56874		0.813	0.436148		0.825	0.497426
0.833	0.569163		0.813	0.43596		0.826	0.497721
0.834	0.569584		0.814	0.435599		0.827	0.498038
0.835	0.570006		0.815	0.435136		0.827	0.498454
0.835	0.570428		0.815	0.434674		0.828	0.499036
0.836	0.570849		0.816	0.434215		0.828	0.499613
0.837	0.57127		0.816	0.433752		0.829	0.500195
0.837	0.571598		0.817	0.433289		0.83	0.500775
0.838	0.571863		0.818	0.432703		0.83	0.501355
0.838	0.572118		0.818	0.431953		0.831	0.501899
0.839	0.572373		0.819	0.431162		0.831	0.50212
0.84	0.572628		0.82	0.430374		0.832	0.501671
0.84	0.572883		0.82	0.429589		0.833	0.501221
0.841	0.573138		0.821	0.4288		0.833	0.500774
0.841	0.573384		0.821	0.428012		0.834	0.500327
0.842	0.573568		0.822	0.427261		0.834	0.49988
0.843	0.573718		0.823	0.427133		0.835	0.499436
0.843	0.573869		0.823	0.427046		0.836	0.49917
0.844	0.574018		0.824	0.426959		0.836	0.499765
0.845	0.57416		0.824	0.426872		0.837	0.500561
0.845	0.574296		0.825	0.426785		0.837	0.501357
0.846	0.574469		0.826	0.426694		0.838	0.50216
0.846	0.574752		0.826	0.426514		0.839	0.50296
0.847	0.57513		0.827	0.425946		0.839	0.503769
0.848	0.575516		0.827	0.425383		0.84	0.504596
0.848	0.575901		0.828	0.424819		0.841	0.505271
0.849	0.576286		0.829	0.424251		0.841	0.505813
0.849	0.576671		0.829	0.423686		0.842	0.506353
0.85	0.577049		0.83	0.423108		0.842	0.506895
0.851	0.577383		0.83	0.422428		0.843	0.507435
0.851	0.577696		0.831	0.421592		0.844	0.507977
0.852	0.578009		0.832	0.420755		0.844	0.508414
0.853	0.578322		0.832	0.419913		0.845	0.508558
0.853	0.578635		0.833	0.419073		0.845	0.50861
0.854	0.578947		0.833	0.418235		0.846	0.508662
0.854	0.579263		0.834	0.417395		0.847	0.508714
0.855	0.579646		0.835	0.416747		0.847	0.508767
0.856	0.580461		0.835	0.416403		0.848	0.508819
0.856	0.581282		0.836	0.416108		0.848	0.508694
0.857	0.5821		0.836	0.415819		0.849	0.508301
0.858	0.582918		0.837	0.415514		0.85	0.507867
0.858	0.583735		0.838	0.415186		0.85	0.507435
0.859	0.584556		0.838	0.414847		0.851	0.507002
0.859	0.58535		0.839	0.414363		0.852	0.506568
0.86	0.585653		0.839	0.413404		0.852	0.506135
0.861	0.585955		0.84	0.41234		0.853	0.505865
0.861	0.586255		0.841	0.41127		0.853	0.505786
0.862	0.586558		0.841	0.410203		0.854	0.505746
0.862	0.586862		0.842	0.409133		0.855	0.505707
0.863	0.587164		0.842	0.408063		0.855	0.505668
0.864	0.587393		0.843	0.407343		0.856	0.505629
0.864	0.587627		0.844	0.40678		0.856	0.50559
0.865	0.58814		0.844	0.406222		0.857	0.505536
0.866	0.588671		0.845	0.405663		0.858	0.505377
0.866	0.589203		0.845	0.405115		0.858	0.505181
0.867	0.589731		0.846	0.404562		0.859	0.504985
0.867	0.590264		0.847	0.404016		0.859	0.504791
0.868	0.590795		0.847	0.403591		0.86	0.504596
0.869	0.591208		0.848	0.403324		0.861	0.504401
0.869	0.591521		0.848	0.403058		0.861	0.504044
0.87	0.59182		0.849	0.402794		0.862	0.503853
0.87	0.592118		0.85	0.402527		0.863	0.503695
0.871	0.592417		0.85	0.402263		0.863	0.503537
0.872	0.592715		0.851	0.402042		0.864	0.503381
0.872	0.593015		0.851	0.402112		0.864	0.503224
0.873	0.593433		0.852	0.402299		0.865	0.503067
0.874	0.593993		0.853	0.402489		0.866	0.502821
0.874	0.594581		0.853	0.402675		0.866	0.502345
0.875	0.595169		0.854	0.402864		0.867	0.501857
0.875	0.595766		0.854	0.403055		0.867	0.501371
0.876	0.596357		0.855	0.403194		0.868	0.500888
0.877	0.596945		0.856	0.40316		0.869	0.500401
0.877	0.597502		0.856	0.403179		0.869	0.499936
0.878	0.597996		0.857	0.403198		0.87	0.499893
0.878	0.598472		0.857	0.403217		0.87	0.500364
0.879	0.598948		0.858	0.403236		0.871	0.500833
0.88	0.599426		0.859	0.403255		0.872	0.501301
0.88	0.599902		0.859	0.403566		0.872	0.501773
0.881	0.600379		0.86	0.404792		0.873	0.502241
0.882	0.600816		0.86	0.40659		0.874	0.502683
0.882	0.600862		0.861	0.408383		0.874	0.502884
0.883	0.600762		0.862	0.410184		0.875	0.502623
0.883	0.600662		0.862	0.411976		0.875	0.502367
0.884	0.600563		0.863	0.413765		0.876	0.502113
0.885	0.600463		0.863	0.415377		0.877	0.501861
0.885	0.600363		0.864	0.416482		0.877	0.501624
0.886	0.600286		0.865	0.417265		0.878	0.501391
0.886	0.600876		0.865	0.418023		0.878	0.501067
0.887	0.601877		0.866	0.418783		0.879	0.500197
0.888	0.602906		0.866	0.419545		0.88	0.499362
0.888	0.603942		0.867	0.420304		0.88	0.498526
0.889	0.604977		0.868	0.420735		0.881	0.497681
0.89	0.606006		0.868	0.420978		0.881	0.496832
0.89	0.607041		0.869	0.421229		0.882	0.495982
0.891	0.607367		0.869	0.421499		0.883	0.495161
0.891	0.607105		0.87	0.421765		0.883	0.494413
0.892	0.606772		0.871	0.422031		0.884	0.493488
0.893	0.606439		0.871	0.422297		0.885	0.492566
0.893	0.606106		0.872	0.422515		0.885	0.49165
0.894	0.605773		0.872	0.422292		0.886	0.490732
0.895	0.605439		0.873	0.421879		0.886	0.489822
0.895	0.60461		0.874	0.421449		0.887	0.488814
0.896	0.603173		0.874	0.421016		0.888	0.487634
0.896	0.60158		0.875	0.420583		0.888	0.486397
0.897	0.599988		0.875	0.420151		0.889	0.485172
0.898	0.598429		0.876	0.419914		0.889	0.483955
0.898	0.596947		0.877	0.420234		0.89	0.482727
0.899	0.595531		0.877	0.420672		0.891	0.481507
0.899	0.594194		0.878	0.421113		0.891	0.48065
0.9	0.593206		0.878	0.421559		0.892	0.480471
0.901	0.592571		0.879	0.421999		0.892	0.480562
0.901	0.591932		0.88	0.422441		0.893	0.480653
0.902	0.591292		0.88	0.422842		0.894	0.480744
0.903	0.590656		0.881	0.422616		0.894	0.480835
0.903	0.590017		0.881	0.422323		0.895	0.480926
0.904	0.589377		0.882	0.422032		0.896	0.480994
0.904	0.588685		0.883	0.421739		0.896	0.48106
0.905	0.587911		0.883	0.421447		0.897	0.481133
0.906	0.587139		0.884	0.421157		0.897	0.481206
0.906	0.586367		0.885	0.42088		0.898	0.481279
0.907	0.585593		0.885	0.420763		0.899	0.481352
0.907	0.584816		0.886	0.420673		0.899	0.481425
0.908	0.584042		0.886	0.420583		0.9	0.481172
0.909	0.583286		0.887	0.420493		0.9	0.480046
0.909	0.582608		0.888	0.420403		0.901	0.478666
0.91	0.581939		0.888	0.420314		0.902	0.47729
0.911	0.581265		0.889	0.42018		0.902	0.475922
0.911	0.580595		0.889	0.419718		0.903	0.474548
0.912	0.579921		0.89	0.418984		0.903	0.473165
0.912	0.579247		0.891	0.418202		0.904	0.472104
0.913	0.578576		0.891	0.417382		0.905	0.472336
0.914	0.577943		0.892	0.416548		0.905	0.472741
0.914	0.577242		0.892	0.415716		0.906	0.473141
0.915	0.576535		0.893	0.414881		0.907	0.473545
0.915	0.575823		0.894	0.415213		0.907	0.473948
0.916	0.575108		0.894	0.416131		0.908	0.474348
0.917	0.574406		0.895	0.417104		0.908	0.474754
0.917	0.573692		0.895	0.418069		0.909	0.475222
0.918	0.572553		0.896	0.419038		0.91	0.475685
0.919	0.571362		0.897	0.42		0.91	0.476144
0.919	0.570172		0.897	0.420962		0.911	0.476609
0.92	0.568989		0.898	0.421257		0.911	0.477071
0.92	0.567806		0.898	0.421347		0.912	0.477534
0.921	0.566621		0.899	0.421429		0.913	0.477989
0.922	0.565432		0.9	0.421511		0.913	0.478393
0.922	0.565494		0.9	0.421594		0.914	0.478928
0.923	0.566128		0.901	0.421676		0.914	0.479464
0.923	0.566818		0.901	0.421758		0.915	0.48
0.924	0.567509		0.902	0.422423		0.916	0.480538
0.925	0.568195		0.903	0.423408		0.916	0.481075
0.925	0.568886		0.903	0.424411		0.917	0.481583
0.926	0.56958		0.904	0.42541		0.918	0.481926
0.927	0.570443		0.904	0.426409		0.918	0.482084
0.927	0.571395		0.905	0.427417		0.919	0.482242
0.928	0.572365		0.906	0.428416		0.919	0.4824
0.928	0.573327		0.906	0.429279		0.92	0.482559
0.929	0.574296		0.907	0.429677		0.921	0.482717
0.93	0.575265		0.907	0.430081		0.921	0.48286
0.93	0.576232		0.908	0.43048		0.922	0.482948
0.931	0.57678		0.909	0.430883		0.922	0.482999
0.931	0.576737		0.909	0.431282		0.923	0.48305
0.932	0.576475		0.91	0.43169		0.924	0.483101
0.933	0.576216		0.91	0.432192		0.924	0.483151
0.933	0.575956		0.911	0.432998		0.925	0.483202
0.934	0.575693		0.912	0.433807		0.925	0.483314
0.935	0.575433		0.912	0.434617		0.926	0.483639
0.935	0.575238		0.913	0.435425		0.927	0.484138
0.936	0.575241		0.913	0.436234		0.927	0.484635
0.936	0.575363		0.914	0.436962		0.928	0.48513
0.937	0.575486		0.915	0.437441		0.929	0.485627
0.938	0.575608		0.915	0.437746		0.929	0.486125
0.938	0.575731		0.916	0.43805		0.93	0.486608
0.939	0.575854		0.916	0.438354		0.93	0.487107
0.94	0.575969		0.917	0.438658		0.931	0.487632
0.94	0.576039		0.918	0.438962		0.932	0.488139
0.941	0.576071		0.918	0.439259		0.932	0.488667
0.941	0.576103		0.919	0.439301		0.933	0.489232
0.942	0.576136		0.919	0.439044		0.933	0.489814
0.943	0.576168		0.92	0.438763		0.934	0.490379
0.943	0.576201		0.921	0.438484		0.935	0.490721
0.944	0.576233		0.921	0.438205		0.935	0.490645
0.944	0.576156		0.922	0.437925		0.936	0.490744
0.945	0.575961		0.922	0.437646		0.936	0.490844
0.946	0.575816		0.923	0.437085		0.937	0.490943
0.946	0.575671		0.924	0.436204		0.938	0.491042
0.947	0.575527		0.924	0.435249		0.938	0.491159
0.948	0.575383		0.925	0.434294		0.939	0.491475
0.948	0.575238		0.925	0.433341		0.94	0.492236
0.949	0.575067		0.926	0.432386		0.94	0.492448
0.949	0.574826		0.927	0.431432		0.941	0.492661
0.95	0.574531		0.927	0.431426		0.941	0.492873
0.951	0.57424		0.928	0.432235		0.942	0.493086
0.951	0.573956		0.928	0.433197		0.943	0.493298
0.952	0.573687		0.929	0.434165		0.943	0.493496
0.952	0.573431		0.93	0.435127		0.944	0.493706
0.953	0.573167		0.93	0.436087		0.944	0.494528
0.954	0.572795		0.931	0.437056		0.945	0.495352
0.954	0.572377		0.931	0.436993		0.946	0.496178
0.955	0.571956		0.932	0.436303		0.946	0.497004
0.956	0.571535		0.933	0.435538		0.947	0.497837
0.956	0.571114		0.933	0.43478		0.947	0.498715
0.957	0.570692		0.934	0.434019		0.948	0.499872
0.957	0.570271		0.934	0.433258		0.949	0.50125
0.958	0.569721		0.935	0.432496		0.949	0.502634
0.959	0.569022		0.936	0.4319		0.95	0.504015
0.959	0.568301		0.936	0.431351		0.951	0.505393
0.96	0.56758		0.937	0.430803		0.951	0.506774
0.96	0.56686		0.937	0.430255		0.952	0.508139
0.961	0.56614		0.938	0.429708		0.952	0.509178
0.962	0.56542		0.939	0.429157		0.953	0.509482
0.962	0.564844		0.939	0.428628		0.954	0.509715
0.963	0.564361		0.94	0.42826		0.954	0.509949
0.964	0.563899		0.94	0.427987		0.955	0.510181
0.964	0.563434		0.941	0.427714		0.955	0.510415
0.965	0.56297		0.942	0.427447		0.956	0.510633
0.965	0.562506		0.942	0.427196		0.957	0.51072
0.966	0.562042		0.943	0.42696		0.957	0.510613
0.967	0.561513		0.943	0.426716		0.958	0.510478
0.967	0.560804		0.944	0.426611		0.958	0.510342
0.968	0.560034		0.945	0.426715		0.959	0.510207
0.968	0.559263		0.945	0.426846		0.96	0.510072
0.969	0.558495		0.946	0.426977		0.96	0.509938
0.97	0.557726		0.946	0.427109		0.961	0.510047
0.97	0.556958		0.947	0.427241		0.962	0.5105
0.971	0.556277		0.948	0.427393		0.962	0.511043
0.972	0.55585		0.948	0.427722		0.963	0.511581
0.972	0.55553		0.949	0.428326		0.963	0.51212
0.973	0.55521		0.95	0.428929		0.964	0.512664
0.973	0.554889		0.95	0.429529		0.965	0.513208
0.974	0.554569		0.951	0.430123		0.965	0.513732
0.975	0.554248		0.951	0.430713		0.966	0.514192
0.975	0.55392		0.952	0.431291		0.966	0.514616
0.976	0.553899		0.953	0.431551		0.967	0.515037
0.977	0.554099		0.953	0.431542		0.968	0.515459
0.977	0.554298		0.954	0.431512		0.968	0.515883
0.978	0.554498		0.954	0.431481		0.969	0.516305
0.978	0.554697		0.955	0.43145		0.969	0.51664
0.979	0.554897		0.956	0.43142		0.97	0.51717
0.98	0.555098		0.956	0.431352		0.971	0.517837
0.98	0.555203		0.957	0.431026		0.971	0.518504
0.981	0.555189		0.957	0.430525		0.972	0.519174
0.981	0.555142		0.958	0.430005		0.973	0.519841
0.982	0.555096		0.959	0.429486		0.973	0.520511
0.983	0.55505		0.959	0.428965		0.974	0.520874
0.983	0.555003		0.96	0.428443		0.974	0.520324
0.984	0.554957		0.96	0.427916		0.975	0.519503
0.985	0.554865		0.961	0.427771		0.976	0.518677
0.985	0.554696		0.962	0.428004		0.976	0.517856
0.986	0.554498		0.962	0.428328		0.977	0.517029
0.986	0.5543		0.963	0.428652		0.977	0.516205
0.987	0.554102		0.963	0.428976		0.978	0.515445
0.988	0.553904		0.964	0.429298		0.979	0.515253
0.988	0.553705		0.965	0.429543		0.979	0.515144
0.989	0.553492		0.965	0.428794		0.98	0.515035
0.989	0.553212		0.966	0.427634		0.98	0.514925
0.99	0.552853		0.966	0.42644		0.981	0.514817
0.991	0.552495		0.967	0.42525		0.982	0.514708
0.991	0.552136		0.968	0.424055		0.982	0.514598
0.992	0.551778		0.968	0.422864		0.983	0.514772
0.993	0.551417		0.969	0.421676		0.984	0.514799
0.993	0.551149		0.969	0.420917		0.984	0.514825
0.994	0.551234		0.97	0.420164		0.985	0.514849
0.994	0.55167		0.971	0.419409		0.985	0.514874
0.995	0.552106		0.971	0.418656		0.986	0.5149
0.996	0.552541		0.972	0.417895		0.987	0.514928
0.996	0.552975		0.972	0.417152		0.987	0.515042
0.997	0.553412		0.973	0.41644		0.988	0.515201
0.997	0.553846		0.974	0.416417		0.988	0.515366
0.998	0.554218		0.974	0.416768		0.989	0.515531
0.999	0.554392		0.975	0.417123		0.99	0.515697
0.999	0.554565		0.975	0.417476		0.99	0.515863
1	0.554737		0.976	0.417832		0.991	0.515989
1.001	0.55491		0.977	0.418185		0.991	0.515332
1.001	0.555084		0.977	0.418443		0.992	0.514467
1.002	0.555232		0.978	0.418133		0.993	0.513605
1.002	0.555213		0.978	0.417303		0.993	0.51275
1.003	0.554911		0.979	0.416473		0.994	0.51189
1.004	0.554609		0.98	0.41565		0.995	0.511042
1.004	0.554309		0.98	0.414817		0.995	0.510175
1.005	0.55402		0.981	0.41399		0.996	0.50929
1.005	0.553749		0.981	0.413206		0.996	0.508471
1.006	0.553484		0.982	0.412602		0.997	0.50766
1.007	0.553216		0.983	0.412206		0.998	0.506844
1.007	0.55317		0.983	0.41181		0.998	0.506031
1.008	0.553221		0.984	0.411412		0.999	0.505215
1.009	0.553279		0.984	0.411016		0.999	0.504684
1.009	0.553338		0.985	0.410619		1	0.504838
1.01	0.553396		0.986	0.410256		1.001	0.505387
1.01	0.553454		0.986	0.41008		1.001	0.505937
1.011	0.553513		0.987	0.410088		1.002	0.50649
1.012	0.553418		0.987	0.410096		1.002	0.50704
1.012	0.553226		0.988	0.410104		1.003	0.50759
1.013	0.553024		0.989	0.410111		1.004	0.507988
1.014	0.552822		0.989	0.410119		1.004	0.508004
1.014	0.552618		0.99	0.410178		1.005	0.507781
1.015	0.552414		0.99	0.410755		1.006	0.50756
1.015	0.552211		0.991	0.411774		1.006	0.50734
1.016	0.552032		0.992	0.412786		1.007	0.507117
1.017	0.551877		0.992	0.413797		1.007	0.506894
1.017	0.55173		0.993	0.414809		1.008	0.506618
1.018	0.551582		0.993	0.415822		1.009	0.505803
1.018	0.551434		0.994	0.416895		1.009	0.504521
1.019	0.551286		0.995	0.41821		1.01	0.503252
1.02	0.551139		0.995	0.419565		1.01	0.501972
1.02	0.551106		0.996	0.420802		1.011	0.500677
1.021	0.551325		0.996	0.421999		1.012	0.499387
1.022	0.551682		0.997	0.423228		1.012	0.498132
1.022	0.552039		0.998	0.424533		1.013	0.497451
1.023	0.552394		0.998	0.425893		1.013	0.497288
1.023	0.552749		0.999	0.427275		1.014	0.497218
1.024	0.553106		0.999	0.428716		1.015	0.497148
1.025	0.553301		1	0.430231		1.015	0.497079
1.025	0.553091		1.001	0.431746		1.016	0.497009
1.026	0.55262		1.001	0.433261		1.017	0.49694
1.026	0.552152		1.002	0.434779		1.017	0.496585
1.027	0.551684		1.002	0.436293		1.018	0.496131
1.028	0.551214		1.003	0.437545		1.018	0.495684
1.028	0.550744		1.004	0.437982		1.019	0.495238
1.029	0.550281		1.004	0.437968		1.02	0.494795
1.03	0.549947		1.005	0.437954		1.02	0.494347
1.03	0.549786		1.005	0.43794		1.021	0.4939
1.031	0.549624		1.006	0.437927		1.021	0.493771
1.031	0.549462		1.007	0.437913		1.022	0.493925
1.032	0.549301		1.007	0.438033		1.023	0.494124
1.033	0.549139		1.008	0.438633		1.023	0.494322
1.033	0.548984		1.008	0.439614		1.024	0.494521
1.034	0.548883		1.009	0.440599		1.024	0.494721
1.034	0.548861		1.01	0.441579		1.025	0.494918
1.035	0.54884		1.01	0.442563		1.026	0.494942
1.036	0.548819		1.011	0.44355		1.026	0.49477
1.036	0.548799		1.011	0.444481		1.027	0.494583
1.037	0.548778		1.012	0.445098		1.028	0.494396
1.038	0.548757		1.013	0.44531		1.028	0.494209
1.038	0.548598		1.013	0.445524		1.029	0.494021
1.039	0.548067		1.014	0.445737		1.029	0.493834
1.039	0.54751		1.015	0.445949		1.03	0.493497
1.04	0.546958		1.015	0.446162		1.031	0.493739
1.041	0.546408		1.016	0.446354		1.031	0.49399
1.041	0.545855		1.016	0.446418		1.032	0.494243
1.042	0.5453		1.017	0.446348		1.032	0.494495
1.042	0.544877		1.018	0.446279		1.033	0.494745
1.043	0.544982		1.018	0.446209		1.034	0.495006
1.044	0.545211		1.019	0.446139		1.034	0.495424
1.044	0.545443		1.019	0.446069		1.035	0.495047
1.045	0.545673		1.02	0.445976		1.035	0.494665
1.046	0.545903		1.021	0.445641		1.036	0.494285
1.046	0.546133		1.021	0.445111		1.037	0.493906
1.047	0.546317		1.022	0.444582		1.037	0.493546
1.047	0.546206		1.022	0.444054		1.038	0.493209
1.048	0.545975		1.023	0.443525		1.039	0.492909
1.049	0.545744		1.024	0.442994		1.039	0.492827
1.049	0.545512		1.024	0.442465		1.04	0.492798
1.05	0.54528		1.025	0.442846		1.04	0.492768
1.051	0.54505		1.025	0.443766		1.041	0.492739
1.051	0.544791		1.026	0.444698		1.042	0.492708
1.052	0.544192		1.027	0.445642		1.042	0.492679
1.052	0.543442		1.027	0.446592		1.043	0.492619
1.053	0.542702		1.028	0.447536		1.043	0.491516
1.054	0.54195		1.028	0.448486		1.044	0.489861
1.054	0.541205		1.029	0.44819		1.045	0.48814
1.055	0.540463		1.03	0.447254		1.045	0.486423
1.055	0.539724		1.03	0.446257		1.046	0.484715
1.056	0.539625		1.031	0.445251		1.046	0.483004
1.057	0.540104		1.031	0.444246		1.047	0.481305
1.057	0.540581		1.032	0.443248		1.048	0.480504
1.058	0.541058		1.033	0.442247		1.048	0.480375
1.059	0.541503		1.033	0.441946		1.049	0.480377
1.059	0.541925		1.034	0.442221		1.05	0.480379
1.06	0.542351		1.034	0.442566		1.05	0.48038
1.06	0.542606		1.035	0.442912		1.051	0.480382
1.061	0.542464		1.036	0.443256		1.051	0.480384
1.062	0.542112		1.036	0.443602		1.052	0.480121
1.062	0.54176		1.037	0.443944		1.053	0.47953
1.063	0.541409		1.037	0.443571		1.053	0.478844
1.063	0.541057		1.038	0.442787		1.054	0.47816
1.064	0.540704		1.039	0.441989		1.054	0.477473
1.065	0.540358		1.039	0.441188		1.055	0.476786
1.065	0.540009		1.04	0.440391		1.056	0.476098
1.066	0.539654		1.04	0.43959		1.056	0.475403
1.067	0.539299		1.041	0.438818		1.057	0.475077
1.067	0.538944		1.042	0.438524		1.057	0.474904
1.068	0.538589		1.042	0.438701		1.058	0.474743
1.068	0.538234		1.043	0.438877		1.059	0.474582
1.069	0.537969		1.043	0.439054		1.059	0.474422
1.07	0.538129		1.044	0.439231		1.06	0.474262
1.07	0.538682		1.045	0.439409		1.061	0.47401
1.071	0.539237		1.045	0.439505		1.061	0.472469
1.071	0.539793		1.046	0.439157		1.062	0.470654
1.072	0.540347		1.046	0.438637		1.062	0.468825
1.073	0.540901		1.047	0.438119		1.063	0.467002
1.073	0.541414		1.048	0.437599		1.064	0.465187
1.074	0.541584		1.048	0.437082		1.064	0.463362
1.075	0.54125		1.049	0.436584		1.065	0.461682
1.075	0.54084		1.049	0.436069		1.065	0.46099
1.076	0.540429		1.05	0.435297		1.066	0.460344
1.076	0.540018		1.051	0.433901		1.067	0.459704
1.077	0.539607		1.051	0.432394		1.067	0.459058
1.078	0.539198		1.052	0.430846		1.068	0.458412
1.078	0.53891		1.052	0.429293		1.068	0.457745
1.079	0.538926		1.053	0.427717		1.069	0.457148
1.079	0.539045		1.054	0.426183		1.07	0.457627
1.08	0.539166		1.054	0.42489		1.07	0.458541
1.081	0.539287		1.055	0.423237		1.071	0.459456
1.081	0.539407		1.055	0.421585		1.072	0.460366
1.082	0.539536		1.056	0.41994		1.072	0.461286
1.083	0.539795		1.057	0.418297		1.073	0.462202
1.083	0.540428		1.057	0.416662		1.073	0.463226
1.084	0.541164		1.058	0.415124		1.074	0.46481
1.084	0.541897		1.058	0.414382		1.075	0.466402
1.085	0.542634		1.059	0.414367		1.075	0.468012
1.086	0.54337		1.06	0.414405		1.076	0.469605
1.086	0.544111		1.06	0.414443		1.076	0.471206
1.087	0.544765		1.061	0.414481		1.077	0.472803
1.088	0.54497		1.061	0.414518		1.078	0.474053
1.088	0.544797		1.062	0.414567		1.078	0.474053
1.089	0.544624		1.063	0.41426		1.079	0.473293
1.089	0.544449		1.063	0.413673		1.079	0.472537
1.09	0.544277		1.064	0.413042		1.08	0.471782
1.091	0.544104		1.064	0.412413		1.081	0.47103
1.091	0.543973		1.065	0.411781		1.081	0.470276
1.092	0.54416		1.066	0.41115		1.082	0.469802
1.092	0.544744		1.066	0.410419		1.083	0.470126
1.093	0.54533		1.067	0.409986		1.083	0.470954
1.094	0.545918		1.067	0.409916		1.084	0.471782
1.094	0.546509		1.068	0.409934		1.084	0.472612
1.095	0.547096		1.069	0.409952		1.085	0.473437
1.096	0.547669		1.069	0.40997		1.086	0.474263
1.096	0.548094		1.07	0.409988		1.086	0.475069
1.097	0.548339		1.07	0.410158		1.087	0.475612
1.097	0.548583		1.071	0.410697		1.087	0.475824
1.098	0.548829		1.072	0.411209		1.088	0.476007
1.099	0.549075		1.072	0.411684		1.089	0.476189
1.099	0.54932		1.073	0.412161		1.089	0.476372
1.1	0.549562		1.073	0.412637		1.09	0.476555
1.1	0.549524		1.074	0.41311		1.09	0.47673
1.101	0.548836		1.075	0.413535		1.091	0.477084
1.102	0.548145		1.075	0.413902		1.092	0.477683
1.102	0.547458		1.076	0.414562		1.092	0.47832
1.103	0.546765		1.076	0.415273		1.093	0.479009
1.104	0.54608		1.077	0.415976		1.094	0.479738
1.104	0.545388		1.078	0.416684		1.094	0.480475
1.105	0.544783		1.078	0.417392		1.095	0.481177
1.105	0.544343		1.079	0.418092		1.095	0.481684
1.106	0.543914		1.08	0.419552		1.096	0.482022
1.107	0.543485		1.08	0.421283		1.097	0.482386
1.107	0.543057		1.081	0.422999		1.097	0.482749
1.108	0.542629		1.081	0.424681		1.098	0.483114
1.108	0.5422		1.082	0.4264		1.098	0.483475
1.109	0.541764		1.083	0.428089		1.099	0.483836
1.11	0.542096		1.083	0.429698		1.1	0.483726
1.11	0.542535		1.084	0.430002		1.1	0.483049
1.111	0.542976		1.084	0.429995		1.101	0.482248
1.112	0.543405		1.085	0.429987		1.101	0.481453
1.112	0.543806		1.086	0.429979		1.102	0.480652
1.113	0.544194		1.086	0.429971		1.103	0.479858
1.113	0.544577		1.087	0.429963		1.103	0.479069
1.114	0.544798		1.087	0.429929		1.104	0.478587
1.115	0.54482		1.088	0.429658		1.105	0.478362
1.115	0.544843		1.089	0.429129		1.105	0.478168
1.116	0.544865		1.089	0.428601		1.106	0.477976
1.116	0.544887		1.09	0.428073		1.106	0.477785
1.117	0.54491		1.09	0.42754		1.107	0.477595
1.118	0.544932		1.091	0.427007		1.108	0.477402
1.118	0.544892		1.092	0.426525		1.108	0.477969
1.119	0.544746		1.092	0.42622		1.109	0.47914
1.12	0.544597		1.093	0.425915		1.109	0.480382
1.12	0.544449		1.093	0.425611		1.11	0.48161
1.121	0.544301		1.094	0.425305		1.111	0.482845
1.121	0.544153		1.095	0.425		1.111	0.48408
1.122	0.544004		1.095	0.424694		1.112	0.485337
1.123	0.543865		1.096	0.424725		1.112	0.486066
1.123	0.543747		1.096	0.425637		1.113	0.486209
1.124	0.543634		1.097	0.426854		1.114	0.486293
1.124	0.543522		1.098	0.428065		1.114	0.486376
1.125	0.543408		1.098	0.429281		1.115	0.48646
1.126	0.543296		1.099	0.430499		1.116	0.486544
1.126	0.543183		1.099	0.431711		1.116	0.486628
1.127	0.542891		1.1	0.432445		1.117	0.486663
1.128	0.54208		1.101	0.432028		1.117	0.486625
1.128	0.541358		1.101	0.430995		1.118	0.486585
1.129	0.540632		1.102	0.429981		1.119	0.486545
1.129	0.53991		1.102	0.429017		1.119	0.486505
1.13	0.539184		1.103	0.428102		1.12	0.486465
1.131	0.538457		1.104	0.427205		1.12	0.486432
1.131	0.537872		1.104	0.426254		1.121	0.48651
1.132	0.537987		1.105	0.425032		1.122	0.486797
1.133	0.538329		1.105	0.424211		1.122	0.487086
1.133	0.538672		1.106	0.423391		1.123	0.487373
1.134	0.539013		1.107	0.422573		1.123	0.487661
1.134	0.539354		1.107	0.421748		1.124	0.487948
1.135	0.539693		1.108	0.420929		1.125	0.488268
1.136	0.540032		1.108	0.42014		1.125	0.488956
1.136	0.540347		1.109	0.420039		1.126	0.490468
1.137	0.540711		1.11	0.419942		1.127	0.491973
1.137	0.541074		1.11	0.419847		1.127	0.493485
1.138	0.541438		1.111	0.41975		1.128	0.494998
1.139	0.541802		1.111	0.419655		1.128	0.496499
1.139	0.542163		1.112	0.419559		1.129	0.498003
1.14	0.542532		1.113	0.419443		1.13	0.499273
1.141	0.543057		1.113	0.418696		1.13	0.500012
1.141	0.542793		1.114	0.418502		1.131	0.500748
1.142	0.542524		1.114	0.418308		1.131	0.501485
1.142	0.542258		1.115	0.418113		1.132	0.502217
1.143	0.541992		1.116	0.417918		1.133	0.50295
1.144	0.541726		1.116	0.417723		1.133	0.503685
1.144	0.541459		1.117	0.417529		1.134	0.504182
1.145	0.541148		1.117	0.417662		1.134	0.504214
1.145	0.541076		1.118	0.418137		1.135	0.504198
1.146	0.54101		1.119	0.418612		1.136	0.504183
1.147	0.540945		1.119	0.419087		1.136	0.504167
1.147	0.540878		1.12	0.419565		1.137	0.504151
1.148	0.540812		1.12	0.420044		1.138	0.504136
1.149	0.540746		1.121	0.420528		1.138	0.503944
1.149	0.540669		1.122	0.421106		1.139	0.503475
1.15	0.54072		1.122	0.421667		1.139	0.50298
1.15	0.540783		1.123	0.422199		1.14	0.502488
1.151	0.540847		1.123	0.422736		1.141	0.501996
1.152	0.540911		1.124	0.423274		1.141	0.501502
1.152	0.540975		1.125	0.423813		1.142	0.501007
1.153	0.541039		1.125	0.424348		1.142	0.500416
1.153	0.541052		1.126	0.424668		1.143	0.499652
1.154	0.540929		1.126	0.424001		1.144	0.498825
1.155	0.540784		1.127	0.423145		1.144	0.498035
1.155	0.540637		1.128	0.422287		1.145	0.497294
1.156	0.540491		1.128	0.421433		1.145	0.496572
1.157	0.540345		1.129	0.42058		1.146	0.495809
1.157	0.5402		1.129	0.419726		1.147	0.495029
1.158	0.540001		1.13	0.419126		1.147	0.495228
1.158	0.539982		1.131	0.419225		1.148	0.496147
1.159	0.540016		1.131	0.419498		1.149	0.497072
1.16	0.54005		1.132	0.419772		1.149	0.497998
1.16	0.540084		1.132	0.420044		1.15	0.498923
1.161	0.540118		1.133	0.420316		1.15	0.49985
1.161	0.540153		1.134	0.42059		1.151	0.500765
1.162	0.540187		1.134	0.421106		1.152	0.501509
1.163	0.540184		1.135	0.422093		1.152	0.501987
1.163	0.540228		1.135	0.423176		1.153	0.502464
1.164	0.540296		1.136	0.424256		1.153	0.502938
1.165	0.540364		1.137	0.425338		1.154	0.503412
1.165	0.54043		1.137	0.426425		1.155	0.503887
1.166	0.540491		1.138	0.427503		1.155	0.504351
1.166	0.540552		1.138	0.42838		1.156	0.504519
1.167	0.540244		1.139	0.428844		1.156	0.503738
1.168	0.538987		1.14	0.429117		1.157	0.502957
1.168	0.537325		1.14	0.429391		1.158	0.502171
1.169	0.535655		1.141	0.429663		1.158	0.501386
1.17	0.533997		1.141	0.429936		1.159	0.500599
1.17	0.532334		1.142	0.43021		1.16	0.499809
1.171	0.53067		1.143	0.430964		1.16	0.499056
1.171	0.529093		1.143	0.43242		1.161	0.498241
1.172	0.52787		1.144	0.434123		1.161	0.497425
1.173	0.526785		1.145	0.435818		1.162	0.496613
1.173	0.5257		1.145	0.43751		1.163	0.49579
1.174	0.524616		1.146	0.439206		1.163	0.49497
1.174	0.523535		1.146	0.44091		1.164	0.494152
1.175	0.522452		1.147	0.442154		1.164	0.493406
1.176	0.521177		1.148	0.442683		1.165	0.493568
1.176	0.518813		1.148	0.44296		1.166	0.493861
1.177	0.515993		1.149	0.443238		1.166	0.494154
1.178	0.513183		1.149	0.443517		1.167	0.49445
1.178	0.510372		1.15	0.443795		1.167	0.494744
1.179	0.507551		1.151	0.444072		1.168	0.495037
1.179	0.504734		1.151	0.444355		1.169	0.495318
1.18	0.502046		1.152	0.44465		1.169	0.495519
1.181	0.500662		1.152	0.44495		1.17	0.495627
1.181	0.500133		1.153	0.445249		1.171	0.495735
1.182	0.499601		1.154	0.445548		1.171	0.495843
1.182	0.499073		1.154	0.445848		1.172	0.495952
1.183	0.498544		1.155	0.446147		1.172	0.496059
1.184	0.498012		1.155	0.44641		1.173	0.496195
1.184	0.497482		1.156	0.446761		1.174	0.496422
1.185	0.496917		1.157	0.447118		1.174	0.496683
1.186	0.496434		1.157	0.44748		1.175	0.496943
1.186	0.495947		1.158	0.447865		1.175	0.497203
1.187	0.495459		1.158	0.448274		1.176	0.497463
1.187	0.494976		1.159	0.448692		1.177	0.497724
1.188	0.494488		1.16	0.449045		1.177	0.497777
1.189	0.494002		1.16	0.448757		1.178	0.497335
1.189	0.493043		1.161	0.448077		1.178	0.496707
1.19	0.491402		1.161	0.4474		1.179	0.496076
1.19	0.489717		1.162	0.446718		1.18	0.49545
1.191	0.488023		1.163	0.446036		1.18	0.494822
1.192	0.486352		1.163	0.445358		1.181	0.494192
1.192	0.484656		1.164	0.444793		1.182	0.493374
1.193	0.482978		1.164	0.444946		1.182	0.492113
1.194	0.481893		1.165	0.445075		1.183	0.490618
1.194	0.481693		1.166	0.445205		1.183	0.489128
1.195	0.481455		1.166	0.445331		1.184	0.487642
1.195	0.481196		1.167	0.445458		1.185	0.486157
1.196	0.480938		1.167	0.445585		1.185	0.484673
1.197	0.48068		1.168	0.445707		1.186	0.483483
1.197	0.480421		1.169	0.445803		1.186	0.483094
1.198	0.479961		1.169	0.445855		1.187	0.483149
1.198	0.480028		1.17	0.445907		1.188	0.483204
1.199	0.480656		1.17	0.445959		1.188	0.483259
1.2	0.481388		1.171	0.446012		1.189	0.483314
1.2	0.482122		1.172	0.446063		1.189	0.483369
1.201	0.482859		1.172	0.44608		1.19	0.483279
1.202	0.483594		1.173	0.445961		1.191	0.483026
1.202	0.484324		1.173	0.445789		1.191	0.482728
1.203	0.48553		1.174	0.445617		1.192	0.48243
1.203	0.486701		1.175	0.445445		1.193	0.482131
1.204	0.487811		1.175	0.445271		1.193	0.481832
1.205	0.488914		1.176	0.4451		1.194	0.481535
1.205	0.490021		1.176	0.444867		1.194	0.481283
1.206	0.491129		1.177	0.444432		1.195	0.481286
1.207	0.492239		1.178	0.444076		1.196	0.481325
1.207	0.49421		1.178	0.443717		1.196	0.481347
1.208	0.496955		1.179	0.443357		1.197	0.481368
1.208	0.499873		1.179	0.442996		1.197	0.48139
1.209	0.502778		1.18	0.442636		1.198	0.481409
1.21	0.505692		1.181	0.44256		1.199	0.481428
1.21	0.508592		1.181	0.443268		1.199	0.481406
1.211	0.5115		1.182	0.444131		1.2	0.481397
1.211	0.513641		1.182	0.444995		1.2	0.481455
1.212	0.514821		1.183	0.445862		1.201	0.481514
1.213	0.515692		1.184	0.446726		1.202	0.481573
1.213	0.516561		1.184	0.447592		1.202	0.481633
1.214	0.517425		1.185	0.448372		1.203	0.481693
1.215	0.518292		1.185	0.448983		1.204	0.481833
1.215	0.519159		1.186	0.449548		1.204	0.48202
1.216	0.520063		1.187	0.450113		1.205	0.482209
1.216	0.521017		1.187	0.450678		1.205	0.482398
1.217	0.521987		1.188	0.45124		1.206	0.482586
1.218	0.522957		1.188	0.451802		1.207	0.482774
1.218	0.523913		1.189	0.452305		1.207	0.482959
1.219	0.524821		1.19	0.453147		1.208	0.483262
1.219	0.525686		1.19	0.454391		1.208	0.483533
1.22	0.526607		1.191	0.455647		1.209	0.483803
1.221	0.527935		1.191	0.4569		1.21	0.484071
1.221	0.530153		1.192	0.458146		1.21	0.484338
1.222	0.532396		1.193	0.459391		1.211	0.484603
1.223	0.53463		1.193	0.460262		1.211	0.484948
1.223	0.536876		1.194	0.459937		1.212	0.485816
1.224	0.539115		1.194	0.45892		1.213	0.487139
1.224	0.54131		1.195	0.457908		1.213	0.488449
1.225	0.542819		1.196	0.456896		1.214	0.489759
1.226	0.542895		1.196	0.455881		1.215	0.491078
1.226	0.542972		1.197	0.454866		1.215	0.492391
1.227	0.543049		1.197	0.454059		1.216	0.493667
1.227	0.543126		1.198	0.453536		1.216	0.4947
1.228	0.543203		1.199	0.453068		1.217	0.495495
1.229	0.543279		1.199	0.452576		1.218	0.496297
1.229	0.543597		1.2	0.452082		1.218	0.497103
1.23	0.544937		1.2	0.451588		1.219	0.497903
1.231	0.546327		1.201	0.451095		1.219	0.498703
1.231	0.547723		1.202	0.450685		1.22	0.499444
[truncated: 42,145 more rows]
