# Supplementary material for: Purified zymogens reveal mechanisms of snake venom metalloproteinase auto-activation
Source: eLife. 2026 Jun 10;15:RP109112. doi: 10.7554/eLife.109112 (PMC13252954; doi:10.7554/eLife.109112)
Supplement: Figure 3—figure supplement 7—source data 3. [file elife-109112-fig3-figsupp7-data3.xlsx]

## Sheet: Sheet1
Volume (mL)	Absorbance (mAU)
0.001	8.71474
0.001	6.71254
0.002	4.70298
0.002	2.71608
0.003	0.70556
0.004	0.04692
0.004	-0.0111
0.005	-0.0069
0.006	-0.0027
0.006	0.00165
0.007	0.0063
0.007	0.01104
0.008	0.01575
0.009	0.02047
0.009	0.02818
0.01	0.03761
0.011	0.04716
0.011	0.05682
0.012	0.06636
0.012	0.07561
0.013	0.08466
0.014	0.09382
0.014	0.10296
0.015	0.11149
0.015	0.11787
0.016	0.12405
0.017	0.13023
0.017	0.13641
0.018	0.14148
0.019	0.14564
0.019	0.14974
0.02	0.15391
0.02	0.15775
0.021	0.15723
0.022	0.15646
0.022	0.15569
0.023	0.15491
0.024	0.15444
0.024	0.15435
0.025	0.15428
0.025	0.15422
0.026	0.15466
0.027	0.15491
0.027	0.15516
0.028	0.15542
0.029	0.15565
0.029	0.15514
0.03	0.15424
0.03	0.15337
0.031	0.15247
0.032	0.15097
0.032	0.14955
0.033	0.14836
0.034	0.14716
0.034	0.1461
0.035	0.14513
0.035	0.1441
0.036	0.14299
0.037	0.14189
0.037	0.14111
0.038	0.14034
0.039	0.13949
0.039	0.13864
0.04	0.13754
0.04	0.1358
0.041	0.13383
0.042	0.13187
0.042	0.12992
0.043	0.128
0.044	0.12641
0.044	0.125
0.045	0.1236
0.045	0.12227
0.046	0.122
0.047	0.12253
0.047	0.12319
0.048	0.12386
0.049	0.12392
0.049	0.12375
0.05	0.12359
0.05	0.12344
0.051	0.12331
0.052	0.12319
0.052	0.12297
0.053	0.1227
0.054	0.12244
0.054	0.12228
0.055	0.12225
0.055	0.12226
0.056	0.12227
0.057	0.12238
0.057	0.12241
0.058	0.12226
0.059	0.12208
0.059	0.12189
0.06	0.12173
0.06	0.1216
0.061	0.12149
0.062	0.12138
0.062	0.12085
0.063	0.12012
0.064	0.11955
0.064	0.11906
0.065	0.11857
0.065	0.11836
0.066	0.11805
0.067	0.1176
0.067	0.11716
0.068	0.11676
0.069	0.11604
0.069	0.11501
0.07	0.11393
0.07	0.11285
0.071	0.11189
0.072	0.11156
0.072	0.11153
0.073	0.11151
0.074	0.11221
0.074	0.11398
0.075	0.11608
0.075	0.11818
0.076	0.12029
0.077	0.12252
0.077	0.12411
0.078	0.12534
0.079	0.12656
0.079	0.12818
0.08	0.13074
0.08	0.13395
0.081	0.13728
0.082	0.13995
0.082	0.14072
0.083	0.14062
0.084	0.14046
0.084	0.14031
0.085	0.14075
0.085	0.1417
0.086	0.14267
0.087	0.14361
0.087	0.14443
0.088	0.14463
0.089	0.1442
0.089	0.14363
0.09	0.14306
0.09	0.14323
0.091	0.14445
0.092	0.14605
0.092	0.14764
0.093	0.14924
0.094	0.15176
0.094	0.15553
0.095	0.15972
0.095	0.1639
0.096	0.16783
0.097	0.17095
0.097	0.17354
0.098	0.17609
0.099	0.17851
0.099	0.17932
0.1	0.17896
0.1	0.17858
0.101	0.17819
0.102	0.17815
0.102	0.17901
0.103	0.18037
0.104	0.18172
0.104	0.18307
0.105	0.18399
0.105	0.18398
0.106	0.18353
0.107	0.18307
0.107	0.18216
0.108	0.18008
0.109	0.17738
0.109	0.17468
0.11	0.17198
0.11	0.16893
0.111	0.16543
0.112	0.16183
0.112	0.15826
0.113	0.15584
0.114	0.15626
0.114	0.15812
0.115	0.15999
0.115	0.16186
0.116	0.1631
0.117	0.16374
0.117	0.16426
0.118	0.16479
0.119	0.16512
0.119	0.16555
0.12	0.16618
0.12	0.16679
0.121	0.16742
0.122	0.1671
0.122	0.16557
0.123	0.16367
0.124	0.16177
0.124	0.1601
0.125	0.15816
0.125	0.15588
0.126	0.15361
0.127	0.15136
0.127	0.1495
0.128	0.14819
0.129	0.14709
0.129	0.14598
0.13	0.14516
0.13	0.14612
0.131	0.14818
0.132	0.15024
0.132	0.15218
0.133	0.15324
0.134	0.15321
0.134	0.15278
0.135	0.15237
0.135	0.15218
0.136	0.15204
0.137	0.15178
0.137	0.15152
0.138	0.15125
0.139	0.15094
0.139	0.15118
0.14	0.15202
0.14	0.15285
0.141	0.15395
0.142	0.15558
0.142	0.15745
0.143	0.15933
0.143	0.16111
0.144	0.16184
0.145	0.16105
0.145	0.15969
0.146	0.15833
0.147	0.15714
0.147	0.1562
0.148	0.15536
0.148	0.15453
0.149	0.15382
0.15	0.15406
0.15	0.15535
0.151	0.15682
0.152	0.15829
0.152	0.15915
0.153	0.15936
0.153	0.15957
0.154	0.15977
0.155	0.16042
0.155	0.16199
0.156	0.16393
0.157	0.16574
0.157	0.16755
0.158	0.16936
0.158	0.17107
0.159	0.17271
0.16	0.17433
0.16	0.17587
0.161	0.17706
0.162	0.17792
0.162	0.1787
0.163	0.17947
0.163	0.1793
0.164	0.17839
0.165	0.17774
0.165	0.17709
0.166	0.17702
0.167	0.17793
0.167	0.17921
0.168	0.18042
0.168	0.18163
0.169	0.18333
0.17	0.18592
0.17	0.18891
0.171	0.19189
0.172	0.19647
0.172	0.20383
0.173	0.2122
0.173	0.22044
0.174	0.22863
0.175	0.23873
0.175	0.25107
0.176	0.26377
0.177	0.27652
0.177	0.2892
0.178	0.30154
0.178	0.31361
0.179	0.32568
0.18	0.33768
0.18	0.34698
0.181	0.35325
0.182	0.35896
0.182	0.36468
0.183	0.3698
0.183	0.37471
0.184	0.38007
0.185	0.38558
0.185	0.391
0.186	0.39524
0.187	0.39774
0.187	0.39957
0.188	0.40143
0.188	0.40262
0.189	0.40276
0.19	0.40249
0.19	0.40222
0.191	0.40192
0.192	0.40153
0.192	0.40119
0.193	0.40102
0.193	0.40084
0.194	0.40075
0.195	0.4017
0.195	0.40401
0.196	0.40648
0.197	0.40895
0.197	0.41097
0.198	0.41186
0.198	0.41206
0.199	0.41227
0.2	0.41357
0.2	0.41618
0.201	0.4186
0.202	0.42104
0.202	0.4232
0.203	0.42331
0.203	0.41981
0.204	0.41454
0.205	0.4093
0.205	0.40387
0.206	0.39665
0.207	0.38745
0.207	0.37829
0.208	0.36907
0.208	0.35974
0.209	0.3504
0.21	0.34116
0.21	0.33195
0.211	0.32237
0.212	0.31441
0.212	0.30928
0.213	0.30415
0.213	0.29934
0.214	0.29567
0.215	0.29331
0.215	0.29134
0.216	0.28938
0.217	0.28712
0.217	0.285
0.218	0.28359
0.218	0.2822
0.219	0.28061
0.22	0.27918
0.22	0.27866
0.221	0.27859
0.222	0.27855
0.222	0.27856
0.223	0.27876
0.223	0.27913
0.224	0.2795
0.225	0.27987
0.225	0.28014
0.226	0.28025
0.227	0.28033
0.227	0.28046
0.228	0.28082
0.228	0.28133
0.229	0.28179
0.23	0.28225
0.23	0.28262
0.231	0.28171
0.232	0.27901
0.232	0.27595
0.233	0.2728
0.233	0.26952
0.234	0.26659
0.235	0.26417
0.235	0.26173
0.236	0.25956
0.237	0.25801
0.237	0.25684
0.238	0.25571
0.238	0.25426
0.239	0.25174
0.24	0.24845
0.24	0.24526
0.241	0.24207
0.242	0.23961
0.242	0.23849
0.243	0.23789
0.243	0.2373
0.244	0.2366
0.245	0.2352
0.245	0.23265
0.246	0.22961
0.247	0.22658
0.247	0.22354
0.248	0.2208
0.248	0.21861
0.249	0.21642
0.25	0.21408
0.25	0.21127
0.251	0.20823
0.252	0.20538
0.252	0.20252
0.253	0.2001
0.253	0.19853
0.254	0.19702
0.255	0.19552
0.255	0.19408
0.256	0.19286
0.257	0.19179
0.257	0.19072
0.258	0.18964
0.258	0.18792
0.259	0.18494
0.26	0.18164
0.26	0.17834
0.261	0.17519
0.262	0.17262
0.262	0.17062
0.263	0.16872
0.263	0.16679
0.264	0.16529
0.265	0.1647
0.265	0.16454
0.266	0.16438
0.267	0.16409
0.267	0.16313
0.268	0.16142
0.268	0.15957
0.269	0.15772
0.27	0.1558
0.27	0.1545
0.271	0.15411
0.272	0.15372
0.272	0.15343
0.273	0.1526
0.273	0.1509
0.274	0.14908
0.275	0.1473
0.275	0.14584
0.276	0.14508
0.276	0.14474
0.277	0.14439
0.278	0.1442
0.278	0.14424
0.279	0.14436
0.28	0.14448
0.28	0.14452
0.281	0.14436
0.281	0.14453
0.282	0.14521
0.283	0.1459
0.283	0.147
0.284	0.14806
0.285	0.1485
0.285	0.14887
0.286	0.14915
0.286	0.14899
0.287	0.14839
0.288	0.1477
0.288	0.147
0.289	0.14652
0.29	0.14709
0.29	0.14853
0.291	0.15004
0.291	0.15156
0.292	0.15289
0.293	0.15369
0.293	0.15421
0.294	0.15471
0.295	0.15499
0.295	0.15462
0.296	0.15386
0.296	0.1531
0.297	0.15273
0.298	0.15311
0.298	0.15411
0.299	0.15543
0.3	0.15682
0.3	0.15804
0.301	0.15885
0.301	0.16035
0.302	0.16185
0.303	0.16348
0.303	0.16564
0.304	0.16805
0.305	0.17029
0.305	0.17252
0.306	0.17457
0.306	0.17593
0.307	0.17706
0.308	0.17815
0.308	0.17932
0.309	0.18061
0.31	0.18173
0.31	0.18275
0.311	0.18375
0.311	0.18466
0.312	0.18567
0.313	0.18716
0.313	0.18864
0.314	0.19048
0.315	0.19315
0.315	0.19534
0.316	0.19736
0.316	0.19972
0.317	0.20349
0.318	0.20872
0.318	0.21423
0.319	0.21975
0.32	0.22565
0.32	0.23214
0.321	0.2383
0.321	0.24442
0.322	0.25134
0.323	0.26052
0.323	0.2709
0.324	0.28124
0.325	0.29153
0.325	0.30286
0.326	0.31665
0.326	0.33101
0.327	0.34536
0.328	0.36018
0.328	0.37603
0.329	0.39257
0.33	0.4087
0.33	0.42485
0.331	0.44187
0.331	0.46111
0.332	0.48174
0.333	0.50231
0.333	0.52299
0.334	0.54424
0.335	0.56606
0.335	0.5876
0.336	0.60934
0.336	0.63122
0.337	0.654
0.338	0.67755
0.338	0.70094
0.339	0.72439
0.34	0.74916
0.34	0.77597
0.341	0.80276
0.341	0.82957
0.342	0.85632
0.343	0.88275
0.343	0.90894
0.344	0.9352
0.345	0.9614
0.345	0.98717
0.346	1.0127
0.346	1.03819
0.347	1.06361
0.348	1.08859
0.348	1.11261
0.349	1.13595
0.35	1.15924
0.35	1.18221
0.351	1.20432
0.351	1.22559
0.352	1.24669
0.353	1.2689
0.353	1.29206
0.354	1.31238
0.355	1.33097
0.355	1.34951
0.356	1.36809
0.356	1.38633
0.357	1.4021
0.358	1.41726
0.358	1.43243
0.359	1.44729
0.36	1.4604
0.36	1.47141
0.361	1.4824
0.361	1.49343
0.362	1.50385
0.363	1.51183
0.363	1.51894
0.364	1.52604
0.365	1.53317
0.365	1.54011
0.366	1.54549
0.366	1.55088
0.367	1.55611
0.368	1.56017
0.368	1.56253
0.369	1.56454
0.37	1.56657
0.37	1.56833
0.371	1.5685
0.371	1.56598
0.372	1.56315
0.373	1.56029
0.373	1.55733
0.374	1.55468
0.375	1.55249
0.375	1.55029
0.376	1.54824
0.376	1.54635
0.377	1.5439
0.378	1.54133
0.378	1.53841
0.379	1.53437
0.38	1.52956
0.38	1.52444
0.381	1.51924
0.381	1.51339
0.382	1.50605
0.383	1.49764
0.383	1.48924
0.384	1.48085
0.385	1.47247
0.385	1.46461
0.386	1.45702
0.386	1.44939
0.387	1.44144
0.388	1.43271
0.388	1.42367
0.389	1.4147
0.39	1.40561
0.39	1.39642
0.391	1.38755
0.391	1.37895
0.392	1.37032
0.393	1.36113
0.393	1.35115
0.394	1.34134
0.395	1.33148
0.395	1.32164
0.396	1.31144
0.396	1.3008
0.397	1.29011
0.398	1.27943
0.398	1.26883
0.399	1.25898
0.4	1.24999
0.4	1.24097
0.401	1.23174
0.401	1.22244
0.402	1.21361
0.403	1.2048
0.403	1.19599
0.404	1.18726
0.404	1.17895
0.405	1.1711
0.406	1.16311
0.406	1.15458
0.407	1.14625
0.408	1.13806
0.408	1.1299
0.409	1.12169
0.409	1.11323
0.41	1.10355
0.411	1.09444
0.411	1.0853
0.412	1.07634
0.413	1.06903
0.413	1.06412
0.414	1.05923
0.414	1.05433
0.415	1.04857
0.416	1.03887
0.416	1.0293
0.417	1.01979
0.418	1.01029
0.418	1.0019
0.419	0.99493
0.419	0.9881
0.42	0.98133
0.421	0.97459
0.421	0.9684
0.422	0.9626
0.423	0.95679
0.423	0.95094
0.424	0.94453
0.424	0.93898
0.425	0.93343
0.426	0.92788
0.426	0.92175
0.427	0.91457
0.428	0.90755
0.428	0.9005
0.429	0.89355
0.429	0.88734
0.43	0.88187
0.431	0.87637
0.431	0.87084
0.432	0.86499
0.433	0.859
0.433	0.85323
0.434	0.84753
0.434	0.8417
0.435	0.83538
0.436	0.82925
0.436	0.82314
0.437	0.81695
0.438	0.81043
0.438	0.80298
0.439	0.79497
0.439	0.78702
0.44	0.77916
0.441	0.77206
0.441	0.7669
0.442	0.7617
0.443	0.75656
0.443	0.75154
0.444	0.7457
0.444	0.73886
0.445	0.73203
0.446	0.72518
0.446	0.71938
0.447	0.71676
0.448	0.71413
0.448	0.71144
0.449	0.70824
0.449	0.70395
0.45	0.6992
0.451	0.69444
0.451	0.68987
0.452	0.68571
0.453	0.68132
0.453	0.6769
0.454	0.67254
0.454	0.66848
0.455	0.66518
0.456	0.66222
0.456	0.65928
0.457	0.65674
0.458	0.65553
0.458	0.65535
0.459	0.65518
0.459	0.65499
0.46	0.65372
0.461	0.65065
0.461	0.64727
0.462	0.64387
0.463	0.64043
0.463	0.63636
0.464	0.63306
0.464	0.62974
0.465	0.62645
0.466	0.62307
0.466	0.6204
0.467	0.61781
0.468	0.61521
0.468	0.61264
0.469	0.61063
0.469	0.60902
0.47	0.60741
0.471	0.60581
0.471	0.60471
0.472	0.60395
0.473	0.60317
0.473	0.60241
0.474	0.60151
0.474	0.59988
0.475	0.59775
0.476	0.59563
0.476	0.59351
0.477	0.59189
0.478	0.59121
0.478	0.5906
0.479	0.58998
0.479	0.58918
0.48	0.58754
0.481	0.5862
0.481	0.58488
0.482	0.58363
0.483	0.58317
0.483	0.58241
0.484	0.58165
0.484	0.58088
0.485	0.58016
0.486	0.57977
0.486	0.5793
0.487	0.57883
0.488	0.57826
0.488	0.57663
0.489	0.57361
0.489	0.57063
0.49	0.56768
0.491	0.56548
0.491	0.56548
0.492	0.56643
0.493	0.56738
0.493	0.5683
0.494	0.56936
0.494	0.57124
0.495	0.57313
0.496	0.57496
0.496	0.57627
0.497	0.57664
0.498	0.57703
0.498	0.57744
0.499	0.57796
0.499	0.57896
0.5	0.5798
0.501	0.58065
0.501	0.58147
0.502	0.58195
0.503	0.58159
0.503	0.58096
0.504	0.58032
0.504	0.57955
0.505	0.57844
0.506	0.57742
0.506	0.57639
0.507	0.5753
0.508	0.57369
0.508	0.571
0.509	0.56799
0.509	0.56496
0.51	0.56188
0.511	0.55894
0.511	0.55675
0.512	0.55468
0.513	0.55262
0.513	0.55053
0.514	0.54862
0.514	0.54639
0.515	0.54412
0.516	0.54184
0.516	0.53977
0.517	0.5374
0.518	0.53498
0.518	0.53258
0.519	0.52998
0.519	0.52778
0.52	0.5262
0.521	0.52465
0.521	0.52311
0.522	0.5211
0.523	0.51772
0.523	0.51433
0.524	0.51091
0.524	0.50787
0.525	0.50521
0.526	0.50257
0.526	0.49997
0.527	0.49735
0.528	0.4947
0.528	0.49332
0.529	0.49191
0.529	0.49052
0.53	0.4886
0.531	0.48561
0.531	0.48247
0.532	0.47931
0.532	0.4762
0.533	0.47375
0.534	0.47187
0.534	0.46999
0.535	0.46809
0.536	0.46608
0.536	0.46455
0.537	0.46327
0.537	0.46198
0.538	0.4606
0.539	0.45887
0.539	0.45801
0.54	0.45715
0.541	0.45622
0.541	0.45467
0.542	0.4532
0.542	0.45196
0.543	0.4507
0.544	0.44955
0.544	0.44847
0.545	0.44628
0.546	0.44408
0.546	0.44192
0.547	0.4401
0.547	0.43831
0.548	0.43644
0.549	0.43456
0.549	0.43283
0.55	0.43177
0.551	0.43117
0.551	0.43057
0.552	0.42989
0.552	0.4287
0.553	0.42731
0.554	0.42593
0.554	0.42455
0.555	0.42283
0.556	0.42013
0.556	0.41713
0.557	0.41412
0.557	0.41122
0.558	0.40891
0.559	0.40721
0.559	0.40556
0.56	0.40385
0.561	0.40205
0.561	0.40028
0.562	0.3989
0.562	0.39754
0.563	0.39624
0.564	0.39519
0.564	0.39378
0.565	0.39243
0.566	0.39114
0.566	0.38974
0.567	0.38834
0.567	0.38703
0.568	0.38573
0.569	0.38445
0.569	0.38344
0.57	0.38304
0.571	0.38274
0.571	0.38242
0.572	0.38218
0.572	0.38258
0.573	0.38333
0.574	0.38412
0.574	0.38469
0.575	0.38433
0.576	0.38356
0.576	0.38276
0.577	0.38195
0.577	0.38192
0.578	0.38183
0.579	0.38149
0.579	0.38113
0.58	0.38104
0.581	0.38156
0.581	0.3817
0.582	0.3818
0.582	0.38188
0.583	0.38101
0.584	0.38018
0.584	0.37971
0.585	0.37926
0.586	0.3792
0.586	0.38028
0.587	0.38215
0.587	0.38405
0.588	0.38594
0.589	0.38705
0.589	0.38748
0.59	0.38752
0.591	0.38755
0.591	0.38782
0.592	0.38846
0.592	0.38966
0.593	0.39085
0.594	0.39188
0.594	0.39141
0.595	0.3905
0.596	0.3895
0.596	0.3885
0.597	0.38793
0.597	0.38759
0.598	0.38729
0.599	0.38701
0.599	0.38649
0.6	0.38506
0.601	0.38336
0.601	0.38166
0.602	0.37996
0.602	0.37862
0.603	0.37737
0.604	0.37606
0.604	0.37475
0.605	0.3735
0.606	0.37266
0.606	0.37272
0.607	0.37278
0.607	0.37286
0.608	0.37315
0.609	0.37287
0.609	0.37238
0.61	0.37189
0.611	0.37132
0.611	0.37006
0.612	0.36816
0.612	0.36627
0.613	0.36436
0.614	0.36256
0.614	0.36175
0.615	0.36134
0.616	0.36095
0.616	0.36065
0.617	0.3605
0.617	0.35948
0.618	0.3585
0.619	0.35759
0.619	0.35646
0.62	0.35576
0.621	0.35521
0.621	0.35467
0.622	0.35413
0.622	0.35297
0.623	0.3513
0.624	0.34955
0.624	0.34779
0.625	0.34626
0.626	0.34616
0.626	0.34649
0.627	0.34681
0.627	0.34713
0.628	0.34692
0.629	0.34635
0.629	0.34572
0.63	0.34509
0.631	0.34457
0.631	0.34427
0.632	0.34402
0.632	0.34377
0.633	0.34352
0.634	0.34341
0.634	0.34348
0.635	0.34358
0.636	0.34369
0.636	0.3438
0.637	0.3441
0.637	0.34445
0.638	0.34481
0.639	0.34516
0.639	0.34518
0.64	0.34483
0.641	0.34443
0.641	0.34403
0.642	0.34358
0.642	0.34316
0.643	0.34273
0.644	0.3423
0.644	0.34188
0.645	0.34177
0.646	0.34184
0.646	0.34193
0.647	0.34203
0.647	0.34208
0.648	0.34159
0.649	0.34105
0.649	0.34049
0.65	0.33995
0.651	0.33948
0.651	0.33917
0.652	0.33887
0.652	0.33858
0.653	0.33806
0.654	0.33783
0.654	0.33778
0.655	0.33773
0.656	0.33769
0.656	0.33971
0.657	0.34165
0.657	0.34359
0.658	0.34548
0.659	0.34612
0.659	0.34602
0.66	0.34598
0.661	0.34595
0.661	0.34595
0.662	0.34622
0.662	0.34716
0.663	0.34813
0.664	0.34908
0.664	0.34814
0.665	0.34616
0.665	0.3438
0.666	0.3415
0.667	0.33982
0.667	0.33966
0.668	0.33913
0.669	0.33858
0.669	0.33802
0.67	0.33677
0.67	0.33557
0.671	0.33449
0.672	0.33347
0.672	0.33276
0.673	0.33302
0.674	0.3338
0.674	0.33471
0.675	0.33562
0.675	0.33631
0.676	0.33659
0.677	0.3366
0.677	0.33656
0.678	0.33642
0.679	0.33595
0.679	0.33529
0.68	0.3346
0.68	0.33392
0.681	0.33327
0.682	0.33279
0.682	0.33237
0.683	0.33195
0.684	0.33189
0.684	0.33268
0.685	0.33392
0.685	0.33523
0.686	0.33653
0.687	0.33721
0.687	0.33594
0.688	0.33405
0.689	0.33215
0.689	0.33007
0.69	0.32881
0.69	0.32851
0.691	0.32845
0.692	0.32841
0.692	0.32841
0.693	0.32828
0.694	0.32811
0.694	0.32793
0.695	0.32756
0.695	0.32859
0.696	0.33042
0.697	0.33235
0.697	0.33428
0.698	0.33569
0.699	0.33573
0.699	0.33544
0.7	0.33514
0.7	0.33482
0.701	0.33507
0.702	0.3355
0.702	0.33596
0.703	0.33584
0.704	0.33474
0.704	0.33241
0.705	0.32986
0.705	0.32733
0.706	0.32544
0.707	0.32395
0.707	0.3226
0.708	0.32127
0.709	0.32054
0.709	0.3207
0.71	0.3213
0.71	0.32195
0.711	0.32267
0.712	0.324
0.712	0.32535
0.713	0.32668
0.714	0.328
0.714	0.32893
0.715	0.32906
0.715	0.32842
0.716	0.32771
0.717	0.32692
0.717	0.32531
0.718	0.32441
0.719	0.32357
0.719	0.32275
0.72	0.32103
0.72	0.31911
0.721	0.31733
0.722	0.31556
0.722	0.31409
0.723	0.3139
0.724	0.31369
0.724	0.31348
0.725	0.31328
0.725	0.3117
0.726	0.30988
0.727	0.30799
0.727	0.30602
0.728	0.30465
0.729	0.30475
0.729	0.30553
0.73	0.3063
0.73	0.30708
0.731	0.30646
0.732	0.30495
0.732	0.30347
0.733	0.302
0.734	0.30064
0.734	0.29992
0.735	0.29999
0.735	0.30032
0.736	0.30065
0.737	0.30107
0.737	0.30104
0.738	0.30074
0.739	0.30044
0.739	0.30029
0.74	0.29983
0.74	0.2987
0.741	0.2973
0.742	0.296
0.742	0.29547
0.743	0.29485
0.744	0.29401
0.744	0.29317
0.745	0.29153
0.745	0.28931
0.746	0.28722
0.747	0.28523
0.747	0.28323
0.748	0.28316
0.749	0.28459
0.749	0.28628
0.75	0.28797
0.75	0.28912
0.751	0.28992
0.752	0.29096
0.752	0.29211
0.753	0.29326
0.754	0.2945
0.754	0.29482
0.755	0.29481
0.755	0.29479
0.756	0.29505
0.757	0.29698
0.757	0.29977
0.758	0.30267
0.759	0.30558
0.759	0.30647
0.76	0.30511
0.76	0.30325
0.761	0.30139
0.762	0.29953
0.762	0.3005
0.763	0.30231
0.764	0.30412
0.764	0.30594
0.765	0.30783
0.765	0.30984
0.766	0.31186
0.767	0.3139
0.767	0.31594
0.768	0.3179
0.769	0.31985
0.769	0.32181
0.77	0.32375
0.77	0.32493
0.771	0.32552
0.772	0.32603
0.772	0.32655
0.773	0.32695
0.774	0.32619
0.774	0.32519
0.775	0.32419
0.775	0.32321
0.776	0.32214
0.777	0.321
0.777	0.31983
0.778	0.31869
0.779	0.31768
0.779	0.31544
0.78	0.31276
0.78	0.30993
0.781	0.30697
0.782	0.30416
0.782	0.30192
0.783	0.30005
0.784	0.29817
0.784	0.29635
0.785	0.29478
0.785	0.29337
0.786	0.29193
0.787	0.29049
0.787	0.2889
0.788	0.28712
0.789	0.28529
0.789	0.28346
0.79	0.28164
0.79	0.28037
0.791	0.27975
0.792	0.27927
0.792	0.27879
0.793	0.27847
0.793	0.27776
0.794	0.27667
0.795	0.27557
0.795	0.27446
0.796	0.27279
0.797	0.27054
0.797	0.26815
0.798	0.26576
0.798	0.26322
0.799	0.26032
0.8	0.25724
0.8	0.25418
0.801	0.25111
0.802	0.24901
0.802	0.24778
0.803	0.2467
0.803	0.24562
0.804	0.24462
0.805	0.24396
0.805	0.24346
0.806	0.24296
0.807	0.24246
0.807	0.24264
0.808	0.24368
0.808	0.24497
0.809	0.24628
0.81	0.24753
0.81	0.24819
0.811	0.2486
0.812	0.24901
0.812	0.24942
0.813	0.25024
0.813	0.25156
0.814	0.25302
0.815	0.25449
0.815	0.25607
0.816	0.25752
0.817	0.2589
0.817	0.26028
0.818	0.26166
0.818	0.26208
0.819	0.26176
0.82	0.26128
0.82	0.2608
0.821	0.2604
0.822	0.2607
0.822	0.2613
0.823	0.2619
0.823	0.26252
0.824	0.26256
0.825	0.26198
0.825	0.26127
0.826	0.26056
0.827	0.25981
0.827	0.25952
0.828	0.25935
0.828	0.25919
0.829	0.25903
0.83	0.25909
0.83	0.25951
0.831	0.26001
0.832	0.26049
0.832	0.26087
0.833	0.26057
0.833	0.25986
0.834	0.25906
0.835	0.25823
0.835	0.25742
0.836	0.25654
0.837	0.25552
0.837	0.25452
0.838	0.25357
0.838	0.25298
0.839	0.25273
0.84	0.25253
0.84	0.25234
0.841	0.25169
0.842	0.25051
0.842	0.24928
0.843	0.24804
0.843	0.24688
0.844	0.24577
0.845	0.24458
0.845	0.24335
0.846	0.24221
0.847	0.24198
0.847	0.2422
0.848	0.24213
0.848	0.24205
0.849	0.24186
0.85	0.24208
0.85	0.24292
0.851	0.24389
0.852	0.24483
0.852	0.24533
0.853	0.24527
0.853	0.24503
0.854	0.24478
0.855	0.24479
0.855	0.24541
0.856	0.24641
0.857	0.24747
0.857	0.24851
0.858	0.24936
0.858	0.25011
0.859	0.2509
0.86	0.25169
0.86	0.25225
0.861	0.25253
0.862	0.25272
0.862	0.25291
0.863	0.25307
0.863	0.25315
0.864	0.25338
0.865	0.25372
0.865	0.25407
0.866	0.25518
0.867	0.25675
0.867	0.25831
0.868	0.25983
0.868	0.26057
0.869	0.25992
0.87	0.25851
0.87	0.25698
0.871	0.25546
0.872	0.2545
0.872	0.25462
0.873	0.25523
0.873	0.25587
0.874	0.25684
0.875	0.25867
0.875	0.26073
0.876	0.26277
0.877	0.26479
0.877	0.26653
0.878	0.26688
0.878	0.26663
0.879	0.26637
0.88	0.26558
0.88	0.26386
0.881	0.26201
0.882	0.26023
0.882	0.25843
0.883	0.25665
0.883	0.25533
0.884	0.25419
0.885	0.25307
0.885	0.25201
0.886	0.2508
0.887	0.24934
0.887	0.24767
0.888	0.24591
0.888	0.24431
0.889	0.24316
0.89	0.24226
0.89	0.24136
0.891	0.24026
0.892	0.23878
0.892	0.23728
0.893	0.23589
0.893	0.23453
0.894	0.23349
0.895	0.23292
0.895	0.23244
0.896	0.23197
0.897	0.23164
0.897	0.23109
0.898	0.22987
0.898	0.22858
0.899	0.22736
0.9	0.22707
0.9	0.22843
0.901	0.23053
0.902	0.23261
0.902	0.23407
0.903	0.23406
0.903	0.23312
0.904	0.23205
0.905	0.23105
0.905	0.23003
0.906	0.22838
0.907	0.2261
0.907	0.22382
0.908	0.22163
0.908	0.21968
0.909	0.21789
0.91	0.21611
0.91	0.21428
0.911	0.21264
0.912	0.21183
0.912	0.21162
0.913	0.2114
0.913	0.21131
0.914	0.2114
0.915	0.21152
0.915	0.21165
0.916	0.21191
0.917	0.21243
0.917	0.21308
0.918	0.21369
0.918	0.2143
0.919	0.21515
0.92	0.21599
0.92	0.21662
0.921	0.21722
0.921	0.21794
0.922	0.21948
0.923	0.22194
0.923	0.22462
0.924	0.22728
0.925	0.22972
0.925	0.23158
0.926	0.23312
0.926	0.23466
0.927	0.2356
0.928	0.23494
0.928	0.23335
0.929	0.23164
0.93	0.22995
0.93	0.22927
0.931	0.22889
0.931	0.22824
0.932	0.22759
0.933	0.22691
0.933	0.22704
0.934	0.22808
0.935	0.22936
0.935	0.23067
0.936	0.23201
0.936	0.2332
0.937	0.23427
0.938	0.23534
0.938	0.23643
0.939	0.23741
0.94	0.23827
0.94	0.23912
0.941	0.23988
0.941	0.23984
0.942	0.23864
0.943	0.23764
0.943	0.23665
0.944	0.23596
0.945	0.23602
0.945	0.23618
0.946	0.23633
0.946	0.23648
0.947	0.23663
0.948	0.2366
0.948	0.23632
0.949	0.23605
0.95	0.23537
0.95	0.23365
0.951	0.23154
0.951	0.22939
0.952	0.22737
0.953	0.22583
0.953	0.22443
0.954	0.2225
0.955	0.22057
0.955	0.2183
0.956	0.21539
0.956	0.21247
0.957	0.20963
0.958	0.20688
0.958	0.20523
0.959	0.20566
0.96	0.20708
0.96	0.2085
0.961	0.21001
0.961	0.21093
0.962	0.21074
0.963	0.21055
0.963	0.2103
0.964	0.2099
0.965	0.20942
0.965	0.20895
0.966	0.2085
0.966	0.20753
0.967	0.20581
0.968	0.20396
0.968	0.20212
0.969	0.20025
0.97	0.1983
0.97	0.19626
0.971	0.19418
0.971	0.19211
0.972	0.19054
0.973	0.19044
0.973	0.19138
0.974	0.19231
0.975	0.19343
0.975	0.19442
0.976	0.19483
0.976	0.19501
0.977	0.19511
0.978	0.19426
0.978	0.19243
0.979	0.19054
0.98	0.18866
0.98	0.18691
0.981	0.186
0.981	0.18587
0.982	0.18581
0.983	0.18586
0.983	0.1868
0.984	0.18805
0.985	0.18888
0.985	0.18971
0.986	0.19039
0.986	0.19076
0.987	0.19123
0.988	0.1919
0.988	0.19257
0.989	0.19345
0.99	0.19398
0.99	0.19406
0.991	0.19415
0.991	0.19444
0.992	0.19523
0.993	0.19622
0.993	0.19716
0.994	0.19813
0.995	0.19875
0.995	0.19772
0.996	0.19671
0.996	0.19569
0.997	0.19476
0.998	0.19449
0.998	0.19543
0.999	0.19636
1	0.19728
1	0.19803
1.001	0.19841
1.001	0.19884
1.002	0.19926
1.003	0.19955
1.003	0.19926
1.004	0.19831
1.005	0.19737
1.005	0.19647
1.006	0.19587
1.006	0.19579
1.007	0.1955
1.008	0.19521
1.008	0.19479
1.009	0.1944
1.01	0.19492
1.01	0.19545
1.011	0.19605
1.011	0.19707
1.012	0.19858
1.013	0.19998
1.013	0.20138
1.014	0.20242
1.015	0.20202
1.015	0.20004
1.016	0.19804
1.016	0.19608
1.017	0.19423
1.018	0.19305
1.018	0.19271
1.019	0.19237
1.02	0.19269
1.02	0.19424
1.021	0.19552
1.021	0.19661
1.022	0.19764
1.023	0.19829
1.023	0.19813
1.024	0.1974
1.025	0.19667
1.025	0.1958
1.026	0.1953
1.026	0.19636
1.027	0.19759
1.028	0.19878
1.028	0.1998
1.029	0.20036
1.03	0.20067
1.03	0.20097
1.031	0.20129
1.031	0.20186
1.032	0.20277
1.033	0.20368
1.033	0.20477
1.034	0.20708
1.035	0.21102
1.035	0.21507
1.036	0.21913
1.036	0.2225
1.037	0.22404
1.038	0.22445
1.038	0.22485
1.039	0.22513
1.04	0.22527
1.04	0.22562
1.041	0.22623
1.041	0.22684
1.042	0.22765
1.043	0.22841
1.043	0.22866
1.044	0.22891
1.045	0.2291
1.045	0.22926
1.046	0.22964
1.046	0.23021
1.047	0.23077
1.048	0.23146
1.048	0.23309
1.049	0.23505
1.049	0.23701
1.05	0.23892
1.051	0.23995
1.051	0.23792
1.052	0.23543
1.053	0.23294
1.053	0.23069
1.054	0.2304
1.054	0.2309
1.055	0.23139
1.056	0.23173
1.056	0.23084
1.057	0.22881
1.058	0.22682
1.058	0.22483
1.059	0.22317
1.059	0.22356
1.06	0.22425
1.061	0.22495
1.061	0.22561
1.062	0.22617
1.063	0.22663
1.063	0.2271
1.064	0.22756
1.064	0.22784
1.065	0.22692
1.066	0.22435
1.066	0.22179
1.067	0.2192
1.068	0.21666
1.068	0.21529
1.069	0.21449
1.069	0.21369
1.07	0.21292
1.071	0.21244
1.071	0.21246
1.072	0.21249
1.073	0.21254
1.073	0.21256
1.074	0.21207
1.074	0.21143
1.075	0.21079
1.076	0.21016
1.076	0.20969
1.077	0.20971
1.078	0.20973
1.078	0.20976
1.079	0.20964
1.079	0.2088
1.08	0.20763
1.081	0.20648
1.081	0.20536
1.082	0.20467
1.083	0.20487
1.083	0.20506
1.084	0.20529
1.084	0.20529
1.085	0.20423
1.086	0.20282
1.086	0.20141
1.087	0.20068
1.088	0.20226
1.088	0.20543
1.089	0.20862
1.089	0.21171
1.09	0.21373
1.091	0.21366
1.091	0.21342
1.092	0.21319
1.093	0.21315
1.093	0.21358
1.094	0.21413
1.094	0.21468
1.095	0.21508
1.096	0.21516
1.096	0.21518
1.097	0.21521
1.098	0.21523
1.098	0.21523
1.099	0.21527
1.099	0.21545
1.1	0.21561
1.101	0.21578
1.101	0.216
1.102	0.21638
1.103	0.21677
1.103	0.21715
1.104	0.21754
1.104	0.21825
1.105	0.21889
1.106	0.21953
1.106	0.22015
1.107	0.22043
1.108	0.2205
1.108	0.22063
1.109	0.22076
1.109	0.22088
1.11	0.22077
1.111	0.22047
1.111	0.22018
1.112	0.21986
1.113	0.21919
1.113	0.21872
1.114	0.21841
1.114	0.21812
1.115	0.21808
1.116	0.21915
1.116	0.21964
1.117	0.22012
1.118	0.22057
1.118	0.22053
1.119	0.21928
1.119	0.21761
1.12	0.21594
1.121	0.21419
1.121	0.21257
1.122	0.21149
1.123	0.2104
1.123	0.20935
1.124	0.20847
1.124	0.20715
1.125	0.2058
1.126	0.20449
1.126	0.20354
1.127	0.20344
1.128	0.20393
1.128	0.2044
1.129	0.20455
1.129	0.20287
1.13	0.20145
1.131	0.20013
1.131	0.19888
1.132	0.19788
1.133	0.19707
1.133	0.19618
1.134	0.19529
1.134	0.19425
1.135	0.19267
1.136	0.19067
1.136	0.18861
1.137	0.18671
1.138	0.18553
1.138	0.18496
1.139	0.18468
1.139	0.18442
1.14	0.18424
1.141	0.1843
1.141	0.1845
1.142	0.18469
1.143	0.18519
1.143	0.1869
1.144	0.1892
1.144	0.19173
1.145	0.1942
1.146	0.19624
1.146	0.19716
1.147	0.197
1.148	0.19684
1.148	0.19635
1.149	0.19479
1.149	0.19296
1.15	0.19125
1.151	0.18957
1.151	0.18818
1.152	0.18746
1.153	0.18689
1.153	0.18636
1.154	0.18584
1.154	0.18578
1.155	0.18567
1.156	0.18552
1.156	0.18538
1.157	0.18562
1.158	0.18652
1.158	0.18704
1.159	0.18755
1.159	0.18806
1.16	0.18851
1.161	0.19106
1.161	0.19373
1.162	0.19637
1.163	0.19904
1.163	0.20145
1.164	0.20363
1.164	0.20575
1.165	0.20765
1.166	0.20748
1.166	0.20779
1.167	0.20811
1.168	0.20844
1.168	0.20919
1.169	0.20941
1.169	0.2093
1.17	0.20921
1.171	0.20902
1.171	0.20863
1.172	0.20798
1.173	0.20734
1.173	0.20673
1.174	0.2066
1.174	0.20528
1.175	0.20364
1.176	0.202
1.176	0.20042
1.177	0.19924
1.178	0.1989
1.178	0.19856
1.179	0.19823
1.179	0.19814
1.18	0.19941
1.181	0.2015
1.181	0.20358
1.182	0.20547
1.182	0.20627
1.183	0.20636
1.184	0.20644
1.184	0.20657
1.185	0.20714
1.186	0.20743
1.186	0.20751
1.187	0.20757
1.187	0.20733
1.188	0.20614
1.189	0.20409
1.189	0.20205
1.19	0.2
1.191	0.19824
1.191	0.19661
1.192	0.19497
1.192	0.19335
1.193	0.19165
1.194	0.18963
1.194	0.18758
1.195	0.18554
1.196	0.18354
1.196	0.18204
1.197	0.18243
1.197	0.18282
1.198	0.1832
1.199	0.18341
1.199	0.18265
1.2	0.18172
1.201	0.18082
1.201	0.18003
1.202	0.18002
1.202	0.18074
1.203	0.18145
1.204	0.18216
1.204	0.18274
1.205	0.18269
1.206	0.18251
1.206	0.18233
1.207	0.18217
1.207	0.18173
1.208	0.18024
1.209	0.17855
1.209	0.17686
1.21	0.17516
1.211	0.17406
1.211	0.17329
1.212	0.17254
1.212	0.17181
1.213	0.17122
1.214	0.17168
1.214	0.17228
1.215	0.17287
1.216	0.17347
1.216	0.17426
1.217	0.17506
1.217	0.17583
1.218	0.17662
1.219	0.1768
1.219	0.17614
1.22	0.1754
1.221	0.17467
1.221	0.17394
1.222	0.1743
1.222	0.17483
1.223	0.17535
1.224	0.17587
1.224	0.17657
1.225	0.17775
1.226	0.17898
1.226	0.18018
1.227	0.1814
1.227	0.18102
1.228	0.18056
1.229	0.1801
1.229	0.17964
1.23	0.17915
1.231	0.1793
1.231	0.17947
1.232	0.17963
1.232	0.1798
1.233	0.17926
1.234	0.17801
1.234	0.17673
1.235	0.17545
1.236	0.17439
1.236	0.17445
1.237	0.17458
1.237	0.17469
1.238	0.17481
1.239	0.17471
1.239	0.17548
1.24	0.17625
1.241	0.17706
1.241	0.17874
1.242	0.18079
1.242	0.18249
1.243	0.1842
1.244	0.18577
1.244	0.18568
1.245	0.18527
1.246	0.18486
1.246	0.18449
1.247	0.18432
1.247	0.18382
1.248	0.18315
[truncated: 43,747 more rows]
