# Supplementary material for: Purified zymogens reveal mechanisms of snake venom metalloproteinase auto-activation
Source: eLife. 2026 Jun 10;15:RP109112. doi: 10.7554/eLife.109112 (PMC13252954; doi:10.7554/eLife.109112)
Supplement: Figure 3—source data 3. [file elife-109112-fig3-data3.xlsx]

## Sheet: IMAC
Volume (mL)	Abs 280 nm (mAU)	Volume (mL)	%B
0	19.0441	0	0
0.00832	18.905	0.041601	0
0.01664	18.7945	0.083203	0
0.02496	18.8289	0.124804	0
0.03328	19.2736	0.166405	0
0.0416	21.2109	0.208006	0
0.04992	23.7083	0.249608	0
0.05824	26.1973	0.291209	0
0.06656	28.6939	0.33281	0
0.07488	31.1998	0.374411	0
0.0832	33.8005	0.416013	0
0.09152	36.5549	0.457614	0
0.09984	39.3363	0.499215	0
0.10816	42.0956	0.540816	0
0.11648	44.9194	0.582418	0
0.1248	47.8386	0.624019	0
0.13312	54.468	0.66562	0
0.14144	82.2888	0.707221	0
0.14976	118.092	0.748823	0
0.15808	127.692	0.790424	0
0.1664	128.57	0.832025	0
0.17472	129.448	0.873626	0
0.18304	130.235	0.915228	0
0.191359	130.897	0.956829	0
0.199679	131.516	0.99843	0
0.207999	132.211	1.04003	0
0.216319	132.887	1.08163	0
0.224639	133.48	1.12323	0
0.232959	133.15	1.16484	0
0.241279	123.388	1.20644	0
0.249599	88.2512	1.24804	0
0.257919	62.948	1.28964	0
0.266239	62.8078	1.33124	0
0.274559	63.4218	1.37284	0
0.282879	64.0944	1.41444	0
0.291199	64.8862	1.45604	0
0.299519	65.6553	1.49764	0
0.307839	66.4607	1.53925	0
0.316159	67.2394	1.58085	0
0.324479	67.9214	1.62245	0
0.332799	68.536	1.66405	0
0.341119	69.096	1.70565	0
0.349439	69.6188	1.74725	0
0.357759	69.9657	1.78885	0
0.366079	70.2754	1.83045	0
0.374399	70.5346	1.87206	0
0.382719	70.7581	1.91366	0
0.391039	70.8143	1.95526	0
0.399359	70.8231	1.99686	0
0.407679	70.7721	2.03846	0
0.415999	70.642	2.08006	0
0.424319	70.5132	2.12166	0
0.432639	70.3994	2.16326	0
0.440959	70.2801	2.20487	0
0.449279	70.1598	2.24647	0
0.457599	70.0585	2.28807	0
0.465919	69.9755	2.32967	0
0.474239	69.9027	2.37127	0
0.482559	69.8413	2.41287	0
0.490879	69.7894	2.45447	0
0.499199	69.7691	2.49608	0
0.507519	69.7671	2.53768	0
0.515839	69.7758	2.57928	0
0.524159	69.8106	2.62088	0
0.532479	69.8697	2.66248	0
0.540799	69.9339	2.70408	0
0.549119	70.0228	2.74568	0
0.557438	70.1286	2.78728	0
0.565758	70.2461	2.82889	0
0.574078	70.3611	2.87049	0
0.582398	70.4598	2.91209	0
0.590718	70.5651	2.95369	0
0.599038	70.6707	2.99529	0
0.607358	70.7835	3.03689	0
0.615678	70.8999	3.07849	0
0.623998	71.0388	3.1201	0
0.632318	71.1859	3.1617	0
0.640638	71.3415	3.2033	0
0.648958	71.5094	3.2449	0
0.657278	71.6812	3.2865	0
0.665598	71.8896	3.3281	0
0.673918	72.132	3.3697	0
0.682238	72.4133	3.4113	0
0.690558	72.7396	3.4529	0
0.698878	73.0931	3.49451	0
0.707198	73.4845	3.53611	0
0.715518	73.9291	3.57771	0
0.723838	74.4057	3.61931	0
0.732158	74.914	3.66091	0
0.740478	75.4671	3.70251	0
0.748798	76.0621	3.74411	0
0.757118	76.6972	3.78572	0
0.765438	77.371	3.82732	0
0.773758	78.0709	3.86892	0
0.782078	78.808	3.91052	0
0.790398	79.5841	3.95212	0
0.798718	80.3956	3.99372	0
0.807038	81.2456	4.03532	0
0.815358	82.1294	4.07692	0
0.823678	83.0367	4.11852	0
0.831998	83.9726	4.16013	0
0.840318	84.9463	4.20173	0
0.848638	85.934	4.24333	0
0.856958	86.9426	4.28493	0
0.865278	87.9906	4.32653	0
0.873598	89.0553	4.36813	0
0.881918	90.1831	4.40973	0
0.890238	91.3196	4.45134	0
0.898558	92.4451	4.49294	0
0.906878	93.5905	4.53454	0
0.915198	94.722	4.57614	0
0.923518	95.858	4.61774	0
0.931837	96.9867	4.65934	0
0.940157	98.1299	4.70094	0
0.948477	99.293	4.74254	0
0.956797	100.463	4.78414	0
0.965117	101.648	4.82575	0
0.973437	102.809	4.86735	0
0.981757	103.941	4.90895	0
0.990077	105.031	4.95055	0
0.998397	106.139	4.99215	0
1.00672	107.243	5.03375	0
1.01504	108.331	5.07535	0
1.02336	109.397	5.11695	0
1.03168	110.431	5.15856	0.316718
1.04	111.436	5.20016	0.5
1.04832	112.4	5.24176	0.5
1.05664	113.331	5.28336	0.5
1.06496	114.199	5.32496	0.5
1.07328	115.028	5.36656	0.5
1.0816	115.826	5.40816	0.5
1.08992	116.576	5.44977	0.5
1.09824	117.271	5.49137	0.5
1.10656	117.949	5.53297	0.5
1.11488	118.608	5.57457	0.5
1.1232	119.216	5.61617	0.5
1.13152	119.834	5.65777	0.5
1.13984	120.394	5.69937	0.5
1.14816	120.952	5.74097	0.5
1.15648	121.49	5.78257	0.5
1.1648	122.011	5.82418	0.5
1.17312	122.51	5.86578	0.5
1.18144	123.005	5.90738	0.5
1.18976	123.493	5.94898	0.5
1.19808	123.97	5.99058	0.5
1.2064	124.445	6.03218	0.5
1.21472	124.906	6.07378	0.5
1.22304	125.372	6.11538	0.5
1.23136	125.822	6.15699	0.5
1.23968	126.252	6.19859	0.5
1.248	126.689	6.24019	0.5
1.25632	127.112	6.28179	0.5
1.26464	127.533	6.32339	0.5
1.27296	127.956	6.36499	0.5
1.28128	128.367	6.40659	0.5
1.2896	128.771	6.4482	0.5
1.29792	129.156	6.4898	0.5
1.30624	129.527	6.5314	0.5
1.31456	129.883	6.573	0.5
1.32288	130.219	6.6146	0.5
1.3312	130.527	6.6562	0.5
1.33952	130.797	6.6978	0.5
1.34784	131.034	6.7394	0.5
1.35616	131.245	6.78101	0.5
1.36448	131.407	6.82261	0.5
1.3728	131.537	6.86421	0.5
1.38112	131.641	6.90581	0.5
1.38944	131.7	6.94741	0.5
1.39776	131.722	6.98901	0.5
1.40608	131.699	7.03061	0.5
1.4144	131.644	7.07221	0.5
1.42272	131.536	7.11381	0.5
1.43104	131.41	7.15542	0.5
1.43936	131.235	7.19702	0.5
1.44768	131.029	7.23862	0.5
1.456	130.78	7.28022	0.5
1.46432	130.501	7.32182	0.5
1.47264	130.187	7.36342	0.5
1.48096	129.822	7.40502	0.5
1.48928	129.422	7.44663	0.5
1.4976	128.995	7.48823	0.5
1.50592	128.574	7.52983	0.5
1.51424	128.099	7.57143	0.5
1.52256	127.582	7.61303	0.5
1.53088	127.018	7.65463	0.5
1.5392	126.432	7.69623	0.5
1.54752	125.821	7.73783	0.5
1.55584	125.172	7.77944	0.5
1.56416	124.509	7.82104	0.5
1.57248	123.827	7.86264	0.5
1.5808	123.133	7.90424	0.5
1.58912	122.417	7.94584	0.5
1.59744	121.69	7.98744	0.5
1.60576	120.943	8.02904	0.5
1.61408	120.193	8.07064	0.5
1.6224	119.446	8.11225	0.5
1.63072	118.707	8.15385	0.5
1.63904	117.965	8.19545	0.5
1.64736	117.243	8.23705	0.5
1.65568	116.52	8.27865	0.5
1.664	115.804	8.32025	0.5
1.67231	115.104	8.36185	0.5
1.68064	114.42	8.40345	0.5
1.68895	113.742	8.44506	0.5
1.69728	113.071	8.48666	0.5
1.70559	112.409	8.52826	0.5
1.71392	111.751	8.56986	0.5
1.72223	111.096	8.61146	0.5
1.73056	110.453	8.65306	0.5
1.73887	109.817	8.69466	0.5
1.7472	109.17	8.73626	0.5
1.75551	108.538	8.77787	0.5
1.76384	107.91	8.81947	0.5
1.77215	107.29	8.86107	0.5
1.78048	106.667	8.90267	0.5
1.78879	106.082	8.94427	0.5
1.79712	105.48	8.98587	0.5
1.80543	104.893	9.02747	0.5
1.81376	104.32	9.06907	0.5
1.82207	103.761	9.11068	0.5
1.83039	103.213	9.15228	0.5
1.83872	102.666	9.19388	0.5
1.84703	102.132	9.23548	0.5
1.85536	101.601	9.27708	0.5
1.86367	101.084	9.31868	0.5
1.872	100.574	9.36028	0.5
1.88031	100.086	9.40189	0.5
1.88864	99.6028	9.44349	0.5
1.89695	99.1321	9.48509	0.5
1.90528	98.6399	9.52669	0.5
1.91359	98.1632	9.56829	0.5
1.92192	97.7073	9.60989	0.5
1.93023	97.2811	9.65149	0.5
1.93856	96.8698	9.69309	0.5
1.94687	96.456	9.73469	0.5
1.9552	96.0501	9.7763	0.5
1.96351	95.6504	9.8179	0.5
1.97184	95.2461	9.8595	0.5
1.98016	94.8446	9.9011	0.5
1.98847	94.4342	9.9427	0.5
1.9968	94.042	9.9843	0.5
2.00511	93.6833	10.0259	0.5
2.01343	93.3273	10.0675	0.5
2.02176	92.961	10.1091	0.5
2.03008	92.5875	10.1507	0.5
2.03839	92.21	10.1923	0.5
2.04671	91.8472	10.2339	0.5
2.05503	91.5085	10.2755	0.5
2.06335	91.1564	10.3171	0.5
2.07167	90.819	10.3587	0.5
2.07999	90.4962	10.4003	0.5
2.08831	90.1689	10.4419	0.5
2.09663	89.8515	10.4835	0.5
2.10495	89.5315	10.5251	0.5
2.11327	89.2171	10.5667	0.5
2.12159	88.8902	10.6083	0.5
2.12991	88.5769	10.6499	0.5
2.13823	88.2945	10.6915	0.5
2.14655	88.019	10.7331	0.5
2.15487	87.7408	10.7747	0.5
2.16319	87.4709	10.8163	0.5
2.17151	87.1933	10.8579	0.5
2.17983	86.9206	10.8995	0.5
2.18815	86.6393	10.9411	0.5
2.19647	86.3344	10.9827	0.5
2.20479	86.0424	11.0243	0.5
2.21311	85.7866	11.0659	0.5
2.22143	85.556	11.1075	0.5
2.22975	85.3132	11.1491	0.5
2.23807	85.0454	11.1907	0.5
2.24639	84.7719	11.2323	0.5
2.25471	84.5065	11.2739	0.5
2.26303	84.2615	11.3155	0.5
2.27135	84.0331	11.3571	0.5
2.27967	83.7934	11.3987	0.5
2.28799	83.5578	11.4403	0.5
2.29631	83.3364	11.4819	0.5
2.30463	83.1356	11.5235	0.5
2.31295	82.9177	11.5651	0.5
2.32127	82.6862	11.6068	0.5
2.32959	82.4514	11.6484	0.5
2.33791	82.2017	11.69	0.5
2.34623	81.9648	11.7316	0.5
2.35455	81.7412	11.7732	0.5
2.36287	81.536	11.8148	0.5
2.37119	81.3313	11.8564	0.5
2.37951	81.1343	11.898	0.5
2.38783	80.9325	11.9396	0.5
2.39615	80.7487	11.9812	0.5
2.40447	80.5483	12.0228	0.5
2.41279	80.3426	12.0644	0.5
2.42111	80.1438	12.106	0.5
2.42943	79.9557	12.1476	0.5
2.43775	79.7898	12.1892	0.5
2.44607	79.6197	12.2308	0.5
2.45439	79.4516	12.2724	0.5
2.46271	79.2703	12.314	0.5
2.47103	79.1045	12.3556	0.5
2.47935	78.9491	12.3972	0.5
2.48767	78.8134	12.4388	0.5
2.49599	78.6786	12.4804	0.5
2.50431	78.5456	12.522	0.5
2.51263	78.4149	12.5636	0.5
2.52095	78.2822	12.6052	0.5
2.52927	78.1534	12.6468	0.5
2.53759	78.0455	12.6884	0.5
2.54591	77.9457	12.73	0.5
2.55423	77.8386	12.7716	0.5
2.56255	77.7153	12.8132	0.5
2.57087	77.5855	12.8548	0.5
2.57919	77.446	12.8964	0.5
2.58751	77.3179	12.938	0.5
2.59583	77.1867	12.9796	0.5
2.60415	77.0493	13.0212	0.5
2.61247	76.9182	13.0628	0.5
2.62079	76.7855	13.1044	0.5
2.62911	76.6549	13.146	0.5
2.63743	76.5292	13.1876	0.5
2.64575	76.3968	13.2292	0.5
2.65407	76.2539	13.2708	0.5
2.66239	76.1015	13.3124	0.5
2.67071	75.9626	13.354	0.5
2.67903	75.836	13.3956	0.5
2.68735	75.7162	13.4372	0.5
2.69567	75.5983	13.4788	0.5
2.70399	75.4774	13.5204	0.5
2.71231	75.3637	13.562	0.5
2.72063	75.2537	13.6036	0.5
2.72895	75.1483	13.6452	0.5
2.73727	75.0544	13.6868	0.5
2.74559	74.9691	13.7284	0.5
2.75391	74.9065	13.77	0.5
2.76223	74.8653	13.8116	0.5
2.77055	74.8325	13.8532	0.5
2.77887	74.7784	13.8948	0.5
2.78719	74.734	13.9364	0.5
2.79551	74.7083	13.978	0.5
2.80383	74.6935	14.0196	0.5
2.81215	74.6843	14.0612	0.5
2.82047	74.6759	14.1028	0.5
2.82879	74.668	14.1444	0.5
2.83711	74.6791	14.186	0.5
2.84543	74.6884	14.2276	0.5
2.85375	74.6907	14.2692	0.5
2.86207	74.6822	14.3108	0.5
2.87039	74.6704	14.3524	0.5
2.87871	74.6588	14.394	0.5
2.88703	74.6461	14.4356	0.5
2.89535	74.6195	14.4772	0.5
2.90367	74.598	14.5188	0.5
2.91199	74.5807	14.5604	0.5
2.92031	74.5637	14.602	0.5
2.92863	74.5648	14.6436	0.5
2.93695	74.5454	14.6852	0.5
2.94527	74.5113	14.7268	0.5
2.95359	74.4816	14.7684	0.5
2.96191	74.4549	14.81	0.5
2.97023	74.4352	14.8516	0.5
2.97855	74.4127	14.8933	0.5
2.98687	74.3742	14.9349	0.5
2.99519	74.3325	14.9765	0.5
3.00351	74.284	15.0181	0.5
3.01183	74.241	15.0597	0.5
3.02015	74.1946	15.1013	0.5
3.02847	74.1277	15.1429	0.5
3.03679	74.0643	15.1845	0.5
3.04511	74.0026	15.2261	0.5
3.05343	73.9504	15.2677	0.5
3.06175	73.9097	15.3093	0.5
3.07007	73.8644	15.3509	0.5
3.07839	73.8036	15.3925	0.5
3.08671	73.7363	15.4341	0.5
3.09503	73.6625	15.4757	0.5
3.10335	73.5773	15.5173	0.5
3.11167	73.4862	15.5589	0.5
3.11999	73.3903	15.6005	0.5
3.12831	73.312	15.6421	0.5
3.13663	73.2302	15.6837	0.5
3.14495	73.1477	15.7253	0.5
3.15327	73.0521	15.7669	0.5
3.16159	72.9256	15.8085	0.5
3.16991	72.7858	15.8501	0.5
3.17823	72.6372	15.8917	0.5
3.18655	72.4999	15.9333	0.5
3.19487	72.374	15.9749	0.5
3.20319	72.2528	16.0165	0.5
3.21151	72.128	16.0581	0.5
3.21983	72.0162	16.0997	0.5
3.22815	71.901	16.1413	0.5
3.23647	71.7772	16.1829	0.5
3.24479	71.6426	16.2245	0.5
3.25311	71.5141	16.2661	0.5
3.26143	71.3835	16.3077	0.5
3.26975	71.2556	16.3493	0.5
3.27807	71.1303	16.3909	0.5
3.28639	71.0031	16.4325	0.5
3.29471	70.8766	16.4741	0.5
3.30303	70.7559	16.5157	0.5
3.31135	70.6467	16.5573	0.5
3.31967	70.5281	16.5989	0.5
3.32799	70.3846	16.6405	0.5
3.33631	70.2464	16.6821	0.5
3.34463	70.1253	16.7237	0.5
3.35295	70.0054	16.7653	0.5
3.36127	69.8975	16.8069	0.5
3.36959	69.81	16.8485	0.5
3.37791	69.7172	16.8901	0.5
3.38623	69.6267	16.9317	0.5
3.39455	69.5382	16.9733	0.5
3.40287	69.4552	17.0149	0.5
3.41119	69.3584	17.0565	0.5
3.41951	69.2379	17.0981	0.5
3.42783	69.1012	17.1397	0.5
3.43615	68.9651	17.1813	0.5
3.44447	68.8248	17.2229	0.5
3.45279	68.694	17.2645	0.5
3.46111	68.5702	17.3061	0.5
3.46943	68.428	17.3477	0.5
3.47775	68.295	17.3893	0.5
3.48607	68.154	17.4309	0.5
3.49439	67.9993	17.4725	0.5
3.50271	67.8417	17.5141	0.5
3.51103	67.6819	17.5557	0.5
3.51935	67.5332	17.5973	0.5
3.52767	67.3967	17.6389	0.5
3.53599	67.2523	17.6805	0.5
3.54431	67.1034	17.7221	0.5
3.55263	66.9554	17.7637	0.5
3.56095	66.801	17.8053	0.5
3.56927	66.641	17.8469	0.5
3.57759	66.4835	17.8885	0.5
3.58591	66.3386	17.9301	0.5
3.59423	66.1921	17.9717	0.5
3.60255	66.0332	18.0133	0.5
3.61087	65.8847	18.0549	0.5
3.61919	65.7465	18.0965	0.5
3.62751	65.6045	18.1381	0.5
3.63583	65.4643	18.1797	0.5
3.64415	65.3214	18.2214	0.5
3.65247	65.1709	18.263	0.5
3.66079	65.037	18.3046	0.5
3.66911	64.9157	18.3462	0.5
3.67743	64.7778	18.3878	0.5
3.68575	64.6173	18.4294	0.5
3.69407	64.4701	18.471	0.5
3.70239	64.34	18.5126	0.5
3.71071	64.2012	18.5542	0.5
3.71903	64.0426	18.5958	0.5
3.72735	63.8815	18.6374	0.5
3.73567	63.7474	18.679	0.5
3.74399	63.6355	18.7206	0.5
3.75231	63.519	18.7622	0.5
3.76063	63.3764	18.8038	0.5
3.76895	63.2267	18.8454	0.5
3.77727	63.0878	18.887	0.5
3.78559	62.9533	18.9286	0.5
3.79391	62.8197	18.9702	0.5
3.80223	62.6949	19.0118	0.5
3.81055	62.5739	19.0534	0.5
3.81887	62.4453	19.095	0.5
3.82719	62.3176	19.1366	0.5
3.83551	62.1857	19.1782	0.5
3.84383	62.0477	19.2198	0.5
3.85215	61.9151	19.2614	0.5
3.86047	61.7961	19.303	0.5
3.86879	61.682	19.3446	0.5
3.87711	61.5817	19.3862	0.5
3.88543	61.4895	19.4278	0.5
3.89375	61.3944	19.4694	0.5
3.90207	61.2871	19.511	0.5
3.91039	61.1816	19.5526	0.5
3.91871	61.085	19.5942	0.5
3.92703	60.9942	19.6358	0.5
3.93535	60.9028	19.6774	0.5
3.94367	60.8147	19.719	0.5
3.95199	60.7399	19.7606	0.5
3.96031	60.6616	19.8022	0.5
3.96863	60.5696	19.8438	0.5
3.97695	60.4654	19.8854	0.5
3.98527	60.358	19.927	0.5
3.99359	60.2502	19.9686	0.5
4.00191	60.1338	20.0102	0.5
4.01023	60.0276	20.0518	0.5
4.01855	59.9285	20.0934	0.5
4.02687	59.832	20.135	0.5
4.03519	59.7356	20.1766	0.5
4.04351	59.6309	20.2182	0.5
4.05183	59.5195	20.2598	0.5
4.06015	59.4081	20.3014	0.5
4.06847	59.2927	20.343	0.5
4.07679	59.1792	20.3846	0.5
4.08511	59.0653	20.4262	0.5
4.09343	58.9594	20.4678	0.5
4.10175	58.8635	20.5094	0.5
4.11007	58.7677	20.551	0.5
4.11839	58.6765	20.5926	0.5
4.12671	58.571	20.6342	0.5
4.13503	58.4569	20.6758	0.5
4.14335	58.355	20.7174	0.5
4.15167	58.2566	20.759	0.5
4.15999	58.1401	20.8006	0.5
4.16831	58.0125	20.8422	0.5
4.17663	57.8856	20.8838	0.5
4.18495	57.7567	20.9254	0.5
4.19327	57.6181	20.967	0.5
4.20159	57.4703	21.0086	0.5
4.20991	57.3229	21.0502	0.5
4.21823	57.1697	21.0918	0.5
4.22655	57.0289	21.1334	0.5
4.23487	56.8998	21.175	0.5
4.24319	56.7525	21.2166	0.5
4.25151	56.586	21.2582	0.5
4.25983	56.4177	21.2998	0.5
4.26815	56.2662	21.3414	0.5
4.27647	56.1325	21.383	0.5
4.28479	55.9954	21.4246	0.5
4.29311	55.845	21.4662	0.5
4.30143	55.6983	21.5079	0.5
4.30975	55.5628	21.5495	0.5
4.31807	55.4291	21.5911	0.5
4.32639	55.2898	21.6327	0.5
4.33471	55.1529	21.6743	0.5
4.34303	55.018	21.7159	0.5
4.35135	54.8778	21.7575	0.5
4.35967	54.7397	21.7991	0.5
4.36799	54.6086	21.8407	0.5
4.37631	54.4737	21.8823	0.5
4.38463	54.3272	21.9239	0.5
4.39295	54.1654	21.9655	0.5
4.40127	53.9929	22.0071	0.5
4.40959	53.827	22.0487	0.5
4.41791	53.6627	22.0903	0.5
4.42623	53.4897	22.1319	0.5
4.43455	53.3123	22.1735	0.5
4.44287	53.1421	22.2151	0.5
4.45119	52.98	22.2567	0.5
4.45951	52.8127	22.2983	0.5
4.46783	52.6401	22.3399	0.5
4.47615	52.4788	22.3815	0.5
4.48447	52.3385	22.4231	0.5
4.49279	52.2142	22.4647	0.5
4.50111	52.0905	22.5063	0.5
4.50943	51.9547	22.5479	0.5
4.51775	51.8031	22.5895	0.5
4.52607	51.6488	22.6311	0.5
4.53439	51.5017	22.6727	0.5
4.54271	51.3559	22.7143	0.5
4.55103	51.2114	22.7559	0.5
4.55935	51.0692	22.7975	0.5
4.56767	50.9259	22.8391	0.5
4.57599	50.7781	22.8807	0.5
4.58431	50.6299	22.9223	0.5
4.59263	50.483	22.9639	0.5
4.60095	50.3385	23.0055	0.5
4.60927	50.194	23.0471	0.5
4.61759	50.0494	23.0887	0.5
4.62591	49.9216	23.1303	0.5
4.63423	49.8055	23.1719	0.5
4.64255	49.6781	23.2135	0.5
4.65087	49.5459	23.2551	0.5
4.65919	49.424	23.2967	0.5
4.66751	49.3137	23.3383	0.5
4.67583	49.2057	23.3799	0.5
4.68415	49.0939	23.4215	0.5
4.69247	48.9769	23.4631	0.5
4.70079	48.8621	23.5047	0.5
4.70911	48.7508	23.5463	0.5
4.71743	48.6359	23.5879	0.5
4.72575	48.5187	23.6295	0.5
4.73407	48.4006	23.6711	0.5
4.74239	48.2887	23.7127	0.5
4.75071	48.1816	23.7543	0.5
4.75903	48.0752	23.7959	0.5
4.76735	47.9693	23.8375	0.5
4.77567	47.8643	23.8791	0.5
4.78399	47.7519	23.9207	0.5
4.79231	47.6328	23.9623	0.5
4.80063	47.5163	24.0039	0.5
4.80895	47.4132	24.0455	0.5
4.81727	47.3109	24.0871	0.5
4.82559	47.2036	24.1287	0.5
4.83391	47.0892	24.1703	0.5
4.84223	46.9642	24.2119	0.5
4.85055	46.8453	24.2535	0.5
4.85887	46.7323	24.2951	0.5
4.86719	46.6214	24.3367	0.5
4.87551	46.5136	24.3783	0.5
4.88383	46.4045	24.4199	0.5
4.89215	46.2983	24.4615	0.5
4.90047	46.2002	24.5031	0.5
4.90879	46.1038	24.5447	0.5
4.91711	46.0038	24.5863	0.5
4.92543	45.8981	24.6279	0.5
4.93375	45.7917	24.6695	0.5
4.94207	45.6926	24.7111	0.5
4.95039	45.5994	24.7527	0.5
4.95871	45.5035	24.7944	0.5
4.96703	45.4012	24.836	0.5
4.97535	45.3063	24.8776	0.5
4.98367	45.2196	24.9192	0.5
4.99199	45.1225	24.9608	0.5
5.00031	45.0131	25.0024	0.5
5.00863	44.9054	25.044	0.5
5.01695	44.8059	25.0856	0.5
5.02527	44.7141	25.1272	0.5
5.03359	44.6243	25.1688	0.5
5.04191	44.5275	25.2104	0.5
5.05023	44.4311	25.252	0.5
5.05855	44.3385	25.2936	0.5
5.06687	44.2465	25.3352	0.5
5.07519	44.1551	25.3768	0.5
5.08351	44.0588	25.4184	0.5
5.09183	43.9619	25.46	0.5
5.10015	43.87	25.5016	0.5
5.10847	43.7817	25.5432	0.5
5.11679	43.6911	25.5848	0.5
5.12511	43.598	25.6264	0.5
5.13343	43.5044	25.668	0.5
5.14175	42.8237	25.7096	0.5
5.15007	42.337	25.7512	0.5
5.15839	42.1461	25.7928	0.5
5.16671	41.9949	25.8344	0.5
5.17503	41.8311	25.876	0.5
5.18335	41.6721	25.9176	0.5
5.19167	41.4651	25.9592	0.5
5.19999	41.2057	26.0008	0.5
5.20831	41.0908	26.0424	0.5
5.21663	41.0977	26.084	0.5
5.22495	41.1648	26.1256	0.5
5.23327	41.2469	26.1672	0.5
5.24159	41.2102	26.2088	0.5
5.24991	41.1137	26.2504	0.5
5.25823	41.0389	26.292	0.5
5.26655	41.0509	26.3336	0.5
5.27487	41.0494	26.3752	0.5
5.28319	41.113	26.4168	0.5
5.29151	41.1776	26.4584	0.5
5.29983	41.357	26.5	0.5
5.30815	41.463	26.5416	0.5
5.31647	41.4628	26.5832	0.5
5.32479	41.4191	26.6248	0.5
5.33311	41.3829	26.6664	0.5
5.34143	41.4706	26.708	0.5
5.34975	41.6114	26.7496	0.5
5.35807	41.7622	26.7912	0.5
5.36639	41.859	26.8328	0.5
5.37471	41.9326	26.8744	0.5
5.38303	42.0091	26.916	0.5
5.39135	42.0848	26.9576	0.5
5.39966	42.1626	26.9992	0.5
5.40799	42.221	27.0408	0.5
5.41631	42.2183	27.0824	0.5
5.42462	42.1648	27.124	0.5
5.43295	42.0737	27.1656	0.5
5.44127	41.9453	27.2072	0.5
5.44958	41.7906	27.2488	0.5
5.45791	41.6434	27.2904	0.5
5.46622	41.5196	27.332	0.5
5.47454	41.3905	27.3736	0.5
5.48287	41.2479	27.4152	0.5
5.49118	41.0869	27.4568	0.5
5.49951	40.9376	27.4984	0.5
5.50783	40.7824	27.54	0.5
5.51614	40.6799	27.5816	0.5
5.52447	40.6479	27.6232	0.5
5.53278	40.637	27.6648	0.5
5.5411	40.6206	27.7064	0.5
5.54943	40.6162	27.748	0.5
5.55774	40.6187	27.7896	0.5
5.56607	40.604	27.8312	0.5
5.57439	40.5491	27.8728	0.5
5.5827	40.4639	27.9144	0.5
5.59103	40.3773	27.956	0.5
5.59934	40.2788	27.9976	0.5
5.60766	40.1765	28.0392	0.5
5.61599	40.0536	28.0809	0.5
5.6243	39.9151	28.1225	0.5
5.63262	39.7783	28.1641	0.5
5.64095	39.6435	28.2057	0.5
5.64926	39.5113	28.2473	0.5
5.65759	39.3793	28.2889	0.5
5.66591	39.2487	28.3305	0.5
5.67422	39.1245	28.3721	0.5
5.68255	39.0105	28.4137	0.5
5.69086	38.8995	28.4553	0.5
5.69918	38.7926	28.4969	0.5
5.70751	38.6804	28.5385	0.5
5.71582	38.5799	28.5801	0.5
5.72414	38.4966	28.6217	0.5
5.73247	38.4142	28.6633	0.5
5.74078	38.3264	28.7049	0.5
5.7491	38.2403	28.7465	0.5
5.75742	38.1574	28.7881	0.5
5.76574	38.0831	28.8297	0.5
5.77407	38.0105	28.8713	0.5
5.78238	37.939	28.9129	0.5
5.7907	37.8642	28.9545	0.5
5.79903	37.7885	28.9961	0.5
5.80734	37.7209	29.0377	0.5
5.81566	37.6604	29.0793	0.5
5.82398	37.5943	29.1209	0.5
5.8323	37.5214	29.1625	0.5
5.84062	37.4582	29.2041	0.5
5.84894	37.401	29.2457	0.5
5.85726	37.3345	29.2873	0.5
5.86558	37.2652	29.3289	0.5
5.8739	37.2047	29.3705	0.5
5.88222	37.1442	29.4121	0.5
5.89054	37.0837	29.4537	0.5
5.89886	37.0255	29.4953	0.5
5.90718	36.9655	29.5369	0.5
5.9155	36.9063	29.5785	0.5
5.92382	36.8444	29.6201	0.5
5.93214	36.7795	29.6617	0.5
5.94046	36.7233	29.7033	0.5
5.94878	36.6644	29.7449	0.5
5.9571	36.6033	29.7865	0.5
5.96542	36.5348	29.8281	0.5
5.97374	36.4668	29.8697	0.5
5.98206	36.4095	29.9113	0.5
5.99038	36.3571	29.9529	0.5
5.9987	36.2974	29.9945	0.5
6.00702	36.2339	30.0361	0.5
6.01534	36.1757	30.0777	0.5
6.02366	36.1297	30.1193	0.5
6.03198	36.0873	30.1609	0.5
6.0403	36.0386	30.2025	0.5
6.04862	35.9976	30.2441	0.5
6.05694	35.9634	30.2857	0.5
6.06526	35.9238	30.3273	0.5
6.07358	35.8816	30.3689	0.5
6.0819	35.8348	30.4105	0.5
6.09022	35.786	30.4521	0.5
6.09854	35.7383	30.4937	0.5
6.10686	35.6874	30.5353	0.5
6.11518	35.641	30.5769	0.5
6.1235	35.6049	30.6185	0.5
6.13182	35.5689	30.6601	0.5
6.14014	35.5265	30.7017	0.5
6.14846	35.4778	30.7433	0.5
6.15678	35.4312	30.7849	0.5
6.1651	35.3906	30.8265	0.5
6.17342	35.3505	30.8681	0.5
6.18174	35.3104	30.9097	0.5
6.19006	35.2751	30.9513	0.5
6.19838	35.2395	30.9929	0.5
6.2067	35.206	31.0345	0.5
6.21502	35.1695	31.0761	0.5
6.22334	35.1176	31.1177	0.5
6.23166	35.0513	31.1593	0.5
6.23998	34.9865	31.2009	0.5
6.2483	34.9291	31.2425	0.5
6.25662	34.8652	31.2841	0.5
6.26494	34.8026	31.3257	0.5
6.27326	34.745	31.3673	0.5
6.28158	34.6815	31.409	0.5
6.2899	34.6103	31.4506	0.5
6.29822	34.5393	31.4922	0.5
6.30654	34.4781	31.5338	0.5
6.31486	34.4181	31.5754	0.5
6.32318	34.3527	31.617	0.5
6.3315	34.2884	31.6586	0.5
6.33982	34.2346	31.7002	0.5
6.34814	34.1819	31.7418	0.5
6.35646	34.1331	31.7834	0.5
6.36478	34.0841	31.825	0.5
6.3731	34.0362	31.8666	0.5
6.38142	33.9912	31.9082	0.5
6.38974	33.9451	31.9498	0.5
6.39806	33.9013	31.9914	0.5
6.40638	33.8573	32.033	0.5
6.4147	33.8106	32.0746	0.5
6.42302	33.7655	32.1162	0.5
6.43134	33.7198	32.1578	0.5
6.43966	33.6737	32.1994	0.5
6.44798	33.626	32.241	0.5
6.4563	33.5783	32.2826	0.5
6.46462	33.5349	32.3242	0.5
6.47294	33.4902	32.3658	0.5
6.48126	33.4423	32.4074	0.5
6.48958	33.3985	32.449	0.5
6.4979	33.3506	32.4906	0.5
6.50622	33.2992	32.5322	0.5
6.51454	33.2534	32.5738	0.5
6.52286	33.2126	32.6154	0.5
6.53118	33.1697	32.657	0.5
6.5395	33.1281	32.6986	0.5
6.54782	33.0844	32.7402	0.5
6.55614	33.0398	32.7818	0.5
6.56446	32.9911	32.8234	0.5
6.57278	32.9385	32.865	0.5
6.5811	32.8858	32.9066	0.5
6.58942	32.8401	32.9482	0.5
6.59774	32.7951	32.9898	0.5
6.60606	32.7491	33.0314	0.5
6.61438	32.7027	33.073	0.5
6.6227	32.6548	33.1146	0.5
6.63102	32.6062	33.1562	0.5
6.63934	32.5576	33.1978	0.5
6.64766	32.5033	33.2394	0.5
6.65598	32.4499	33.281	0.5
6.6643	32.4052	33.3226	0.5
6.67262	32.3621	33.3642	0.5
6.68094	32.3193	33.4058	0.5
6.68926	32.2752	33.4474	0.5
6.69758	32.2362	33.489	0.5
6.7059	32.1935	33.5306	0.5
6.71422	32.1426	33.5722	0.5
6.72254	32.0914	33.6138	0.5
6.73086	32.0437	33.6554	0.5
6.73918	32.0004	33.697	0.5
6.7475	31.9658	33.7386	0.5
6.75582	31.9328	33.7802	0.5
6.76414	31.8939	33.8218	0.5
6.77246	31.8558	33.8634	0.5
6.78078	31.8192	33.905	0.5
6.7891	31.7771	33.9466	0.5
6.79742	31.7323	33.9882	0.5
6.80574	31.6891	34.0298	0.5
6.81406	31.6518	34.0714	0.5
6.82238	31.6134	34.113	0.5
6.8307	31.5702	34.1546	0.5
6.83902	31.5283	34.1962	0.5
6.84734	31.4816	34.2378	0.5
6.85566	31.4318	34.2794	0.5
6.86398	31.3811	34.321	0.5
6.8723	31.3293	34.3626	0.5
6.88062	31.2813	34.4042	0.5
6.88894	31.2387	34.4458	0.5
6.89726	31.193	34.4874	0.5
6.90558	31.1465	34.529	0.5
6.9139	31.1008	34.5706	0.5
6.92222	31.0551	34.6122	0.5
6.93054	31.0119	34.6539	0.5
6.93886	30.9698	34.6955	0.5
6.94718	30.932	34.7371	0.5
6.9555	30.8973	34.7787	0.5
6.96382	30.8614	34.8203	0.5
6.97214	30.8266	34.8619	0.5
6.98046	30.788	34.9035	0.5
6.98878	30.7413	34.9451	0.5
6.9971	30.6955	34.9867	0.5
7.00542	30.6497	35.0283	0.5
7.01374	30.6029	35.0699	0.5
7.02206	30.5607	35.1115	0.5
7.03038	30.518	35.1531	0.5
7.0387	30.4715	35.1947	0.5
7.04702	30.4248	35.2363	0.5
7.05534	30.3801	35.2779	0.5
7.06366	30.3331	35.3195	0.5
7.07198	30.2825	35.3611	0.5
7.0803	30.2337	35.4027	0.5
7.08862	30.1863	35.4443	0.5
7.09694	30.141	35.4859	0.5
7.10526	30.0977	35.5275	0.5
7.11358	30.0528	35.5691	0.5
7.1219	30.0097	35.6107	0.5
7.13022	29.9691	35.6523	0.5
7.13854	29.9282	35.6939	0.5
7.14686	29.8822	35.7355	0.5
7.15518	29.8342	35.7771	0.5
7.1635	29.7918	35.8187	0.5
7.17182	29.752	35.8603	0.5
7.18014	29.7083	35.9019	0.5
7.18846	29.6627	35.9435	0.5
7.19678	29.6205	35.9851	0.5
7.2051	29.5822	36.0267	0.5
7.21342	29.5453	36.0683	0.5
7.22174	29.5058	36.1099	0.5
7.23006	29.4681	36.1515	0.5
7.23838	29.434	36.1931	0.5
7.2467	29.4024	36.2347	0.5
7.25502	29.368	36.2763	0.5
7.26334	29.3285	36.3179	0.5
7.27166	29.2922	36.3595	0.5
7.27998	29.2616	36.4011	0.5
7.2883	29.2328	36.4427	0.5
7.29662	29.2	36.4843	0.5
7.30494	29.1638	36.5259	0.5
7.31326	29.1277	36.5675	0.5
7.32158	29.0918	36.6091	0.5
7.3299	29.0529	36.6507	0.5
7.33822	29.0146	36.6923	0.5
7.34654	28.9803	36.7339	0.5
7.35486	28.9462	36.7755	0.5
7.36318	28.9119	36.8171	0.5
7.3715	28.8745	36.8587	0.5
7.37982	28.8344	36.9003	0.5
7.38814	28.7925	36.9419	0.5
7.39646	28.7474	36.9835	0.5
7.40478	28.7056	37.0251	0.5
7.4131	28.671	37.0667	0.5
7.42142	28.6379	37.1083	0.5
7.42974	28.5989	37.1499	0.5
7.43806	28.5559	37.1915	0.5
7.44638	28.5146	37.2331	0.5
7.4547	28.4779	37.2747	0.5
7.46302	28.4382	37.3163	0.5
7.47134	28.3983	37.3579	0.5
7.47966	28.3604	37.3995	0.5
7.48798	28.3286	37.4411	0.5
7.4963	28.301	37.4827	0.5
7.50462	28.2648	37.5243	0.5
7.51294	28.2252	37.5659	0.5
7.52126	28.1876	37.6075	0.5
7.52958	28.1508	37.6491	0.5
7.5379	28.117	37.6907	0.5
7.54622	28.0808	37.7323	0.5
7.55454	28.0406	37.7739	0.5
7.56286	28.0043	37.8155	0.5
7.57118	27.9647	37.8571	0.5
7.5795	27.9224	37.8987	0.5
7.58782	27.881	37.9404	0.5
7.59614	27.8384	37.9819	0.5
7.60446	27.799	38.0236	0.5
7.61278	27.7597	38.0652	0.5
7.6211	27.7195	38.1068	0.5
7.62942	27.6811	38.1484	0.5
7.63774	27.6417	38.19	0.5
7.64606	27.6062	38.2316	0.5
7.65438	27.5678	38.2732	0.5
7.6627	27.5248	38.3148	0.5
7.67102	27.4903	38.3564	0.5
7.67934	27.4574	38.398	0.5
7.68766	27.4206	38.4396	0.5
7.69598	27.3857	38.4812	0.5
7.7043	27.3514	38.5228	0.5
7.71262	27.319	38.5644	0.5
7.72094	27.2847	38.606	0.5
7.72926	27.249	38.6476	0.5
7.73758	27.2122	38.6892	0.5
7.7459	27.1792	38.7308	0.5
7.75422	27.1537	38.7724	0.5
7.76254	27.1279	38.814	0.5
7.77086	27.1003	38.8556	0.5
7.77918	27.0742	38.8972	0.5
7.7875	27.0502	38.9388	0.5
7.79582	27.0244	38.9804	0.5
7.80414	26.9978	39.022	0.5
7.81246	26.972	39.0636	0.5
7.82078	26.947	39.1052	0.5
7.8291	26.9219	39.1468	0.5
7.83742	26.8965	39.1884	0.5
7.84574	26.8691	39.23	0.5
7.85406	26.8408	39.2716	0.5
7.86238	26.8133	39.3132	0.5
7.8707	26.7857	39.3548	0.5
7.87902	26.7561	39.3964	0.5
7.88734	26.7256	39.438	0.5
7.89566	26.6944	39.4796	0.5
7.90398	26.6628	39.5212	0.5
7.9123	26.6316	39.5628	0.5
7.92062	26.6009	39.6044	0.5
7.92894	26.5669	39.646	0.5
7.93726	26.5297	39.6876	0.5
7.94558	26.4953	39.7292	0.5
7.9539	26.4626	39.7708	0.5
7.96222	26.4267	39.8124	0.5
7.97054	26.3906	39.854	0.5
7.97886	26.3569	39.8956	0.5
7.98718	26.3226	39.9372	0.5
7.9955	26.2887	39.9788	0.5
8.00382	26.2504	40.0204	0.5
8.01214	26.2092	40.062	0.5
8.02046	26.1742	40.1036	0.5
8.02878	26.1388	40.1452	0.5
8.0371	26.1004	40.1868	0.5
8.04542	26.0635	40.2284	0.5
8.05374	26.028	40.27	0.5
8.06206	25.9926	40.3116	0.5
8.07038	25.9577	40.3532	0.5
8.0787	25.9233	40.3948	0.5
8.08702	25.8863	40.4364	0.5
8.09534	25.8502	40.478	0.5
8.10366	25.8175	40.5196	0.5
8.11198	25.7828	40.5612	0.5
8.1203	25.7427	40.6028	0.5
8.12862	25.7032	40.6444	0.5
8.13694	25.6659	40.686	0.5
8.14526	25.6268	40.7276	0.5
8.15358	25.5866	40.7692	0.5
8.1619	25.5494	40.8108	0.5
8.17022	25.5201	40.8524	0.5
8.17854	25.4925	40.894	0.5
8.18686	25.4612	40.9356	0.5
8.19518	25.4279	40.9772	0.5
8.2035	25.3959	41.0188	0.5
8.21182	25.3678	41.0604	0.5
8.22014	25.3401	41.102	0.5
8.22846	25.307	41.1436	0.5
8.23678	25.2809	41.1852	0.5
8.2451	25.2627	41.2268	0.5
8.25342	25.2381	41.2684	0.5
8.26174	25.2125	41.3101	0.5
8.27006	25.1826	41.3516	0.5
8.27838	25.1499	41.3933	0.5
8.2867	25.1203	41.4349	0.5
8.29502	25.0919	41.4765	0.5
8.30334	25.0603	41.5181	0.5
8.31166	25.0278	41.5597	0.5
8.31998	25.0012	41.6013	0.5
8.3283	24.9757	41.6429	0.5
8.33662	24.9444	41.6845	0.5
8.34494	24.9138	41.7261	0.5
8.35326	24.8866	41.7677	0.5
8.36158	24.8563	41.8093	0.5
8.3699	24.8253	41.8509	0.5
8.37822	24.8007	41.8925	0.5
8.38654	24.777	41.9341	0.5
8.39486	24.7548	41.9757	0.5
8.40318	24.7324	42.0173	0.5
8.4115	24.7089	42.0589	0.5
8.41982	24.6892	42.1005	0.5
8.42814	24.6691	42.1421	0.5
8.43646	24.6464	42.1837	0.5
8.44478	24.6216	42.2253	0.5
8.4531	24.597	42.2669	0.5
8.46142	24.5761	42.3085	0.5
8.46974	24.5517	42.3501	0.5
8.47806	24.5241	42.3917	0.5
8.48638	24.4956	42.4333	0.5
8.4947	24.4662	42.4749	0.5
8.50302	24.4411	42.5165	0.5
8.51134	24.4165	42.5581	0.5
8.51966	24.3828	42.5997	0.5
8.52798	24.3522	42.6413	0.5
8.5363	24.328	42.6829	0.5
8.54462	24.305	42.7245	0.5
8.55294	24.2752	42.7661	0.5
8.56126	24.246	42.8077	0.5
8.56958	24.2196	42.8493	0.5
8.5779	24.1923	42.8909	0.5
8.58622	24.1622	42.9325	0.5
8.59454	24.1319	42.9741	0.5
8.60286	24.0998	43.0157	0.5
8.61118	24.069	43.0573	0.5
8.6195	24.0402	43.0989	0.5
8.62782	24.009	43.1405	0.5
8.63614	23.978	43.1821	0.5
8.64446	23.947	43.2237	0.5
8.65278	23.9186	43.2653	0.5
8.6611	23.894	43.3069	0.5
8.66942	23.8639	43.3485	0.5
8.67774	23.8327	43.3901	0.5
8.68606	23.7994	43.4317	0.5
8.69438	23.7748	43.4733	0.5
8.7027	23.7521	43.5149	0.5
8.71102	23.7256	43.5565	0.5
8.71934	23.6989	43.5981	0.5
8.72766	23.6764	43.6397	0.5
8.73598	23.6516	43.6813	0.5
8.7443	23.6273	43.7229	0.5
8.75262	23.602	43.7645	0.5
8.76094	23.5757	43.8061	0.5
8.76926	23.5495	43.8477	0.5
8.77758	23.529	43.8893	0.5
8.7859	23.5089	43.9309	0.5
8.79422	23.4844	43.9725	0.5
8.80254	23.4578	44.0141	0.5
8.81086	23.4331	44.0557	0.5
8.81918	23.4124	44.0973	0.5
8.8275	23.3914	44.1389	0.5
8.83582	23.369	44.1805	0.5
8.84414	23.3451	44.2221	0.5
8.85246	23.3203	44.2637	0.5
8.86078	23.2923	44.3053	0.5
8.8691	23.2634	44.3469	0.5
8.87742	23.2329	44.3885	0.5
8.88574	23.2037	44.4301	0.5
8.89406	23.1788	44.4717	0.5
8.90238	23.1484	44.5133	0.5
8.9107	23.1129	44.5549	0.5
8.91902	23.0821	44.5966	0.5
8.92734	23.0544	44.6382	0.5
8.93566	23.0259	44.6798	0.5
8.94398	22.9955	44.7214	0.5
8.9523	22.9674	44.763	0.5
8.96062	22.9429	44.8046	0.5
8.96894	22.9208	44.8462	0.5
8.97726	22.889	44.8878	0.5
8.98558	22.8584	44.9294	0.5
8.9939	22.8336	44.971	0.5
9.00221	22.8086	45.0126	0.5
9.01054	22.7823	45.0542	0.5
9.01886	22.7542	45.0958	0.5
9.02718	22.7219	45.1374	0.5
9.0355	22.6917	45.179	0.5
9.04382	22.6654	45.2206	0.5
9.05213	22.6379	45.2622	0.5
9.06045	22.606	45.3038	0.5
9.06878	22.5779	45.3454	0.5
9.0771	22.552	45.387	0.5
9.08542	22.5283	45.4286	0.5
9.09374	22.5022	45.4702	0.5
9.10206	22.4723	45.5118	0.5
9.11037	22.4436	45.5534	0.5
9.1187	22.4163	45.595	0.5
9.12702	22.3865	45.6366	0.5
9.13534	22.3576	45.6782	0.5
9.14366	22.3276	45.7198	0.5
9.15198	22.3013	45.7614	0.5
9.16029	22.2761	45.803	0.5
9.16862	22.2509	45.8446	0.5
9.17694	22.2225	45.8862	0.5
9.18525	22.196	45.9278	0.5
9.19357	22.1664	45.9694	0.5
9.2019	22.1384	46.011	0.5
9.21022	22.1098	46.0526	0.5
9.21853	22.0787	46.0942	0.5
9.22686	22.0525	46.1358	0.5
9.23517	22.0297	46.1774	0.5
9.24349	22.0071	46.219	0.5
9.25182	21.9814	46.2606	0.5
9.26014	21.9548	46.3022	0.5
9.26846	21.929	46.3438	0.5
9.27678	21.9001	46.3854	0.5
9.2851	21.8727	46.427	0.5
9.29341	21.8447	46.4686	0.5
9.30174	21.8141	46.5102	0.5
9.31006	21.7891	46.5518	0.5
9.31837	21.7668	46.5934	0.5
9.3267	21.7414	46.635	0.5
9.33502	21.7178	46.6766	0.5
9.34333	21.6873	46.7182	0.5
9.35165	21.6592	46.7598	0.5
9.35998	21.6361	46.8014	0.5
9.36829	21.6132	46.843	0.5
9.37661	21.5865	46.8846	0.5
9.38493	21.557	46.9262	0.5
9.39325	21.5363	46.9678	0.5
9.40157	21.5216	47.0094	0.5
9.4099	21.5056	47.051	0.5
9.41822	21.4882	47.0926	0.5
9.42653	21.47	47.1342	0.5
9.43486	21.4444	47.1758	0.5
9.44317	21.42	47.2174	0.5
9.45149	21.403	47.259	0.5
9.45982	21.3814	47.3006	0.5
9.46814	21.3591	47.3422	0.5
9.47645	21.3405	47.3838	0.5
9.48478	21.3245	47.4254	0.5
9.49309	21.3073	47.467	0.5
9.50141	21.2844	47.5086	0.5
9.50973	21.2636	47.5502	0.5
9.51805	21.24	47.5918	0.5
9.52637	21.2191	47.6334	0.5
9.53469	21.2056	47.675	0.5
9.54302	21.1862	47.7166	0.5
9.55133	21.1617	47.7582	0.5
9.55965	21.1424	47.7998	0.5
9.56797	21.1271	47.8415	0.5
9.57629	21.1106	47.883	0.5
9.58461	21.0924	47.9247	0.5
9.59294	21.0741	47.9663	0.5
9.60125	21.0538	48.0079	0.5
9.60957	21.0349	48.0495	0.5
9.61789	21.0122	48.0911	0.5
9.62621	20.9903	48.1327	0.5
9.63453	20.9661	48.1743	0.5
9.64285	20.9436	48.2159	0.5
9.65118	20.9215	48.2575	0.5
9.65949	20.8912	48.2991	0.5
9.66781	20.861	48.3407	0.5
9.67613	20.8313	48.3823	0.5
9.68445	20.8005	48.4239	0.5
9.69277	20.7792	48.4655	0.5
9.70109	20.7512	48.5071	0.5
9.70941	20.7217	48.5487	0.5
9.71773	20.6957	48.5903	0.5
9.72605	20.6689	48.6319	0.5
9.73437	20.6396	48.6735	0.5
9.74269	20.6141	48.7151	0.5
9.75101	20.5964	48.7567	0.5
9.75933	20.5721	48.7983	0.5
9.76765	20.5496	48.8399	0.5
9.77597	20.5233	48.8815	0.5
9.78429	20.4968	48.9231	0.5
9.79261	20.4754	48.9647	0.5
9.80093	20.4535	49.0063	0.5
9.80925	20.4303	49.0479	0.5
9.81757	20.4084	49.0895	0.5
9.82589	20.3834	49.1311	0.5
9.83421	20.36	49.1727	0.5
9.84253	20.3404	49.2143	0.5
9.85085	20.3191	49.2559	0.5
9.85917	20.2953	49.2975	0.5
9.86749	20.2693	49.3391	0.5
9.87581	20.2495	49.3807	0.5
9.88413	20.2299	49.4223	0.5
9.89245	20.2112	49.4639	0.5
9.90077	20.1888	49.5055	0.5
9.90909	20.1685	49.5471	0.5
9.91741	20.1468	49.5887	0.5
9.92573	20.1261	49.6303	0.5
9.93405	20.1085	49.6719	0.5
9.94237	20.0836	49.7135	0.5
9.95069	20.057	49.7551	0.5
9.95901	20.0355	49.7967	0.5
9.96733	20.0188	49.8383	0.5
9.97565	19.9949	49.8799	0.5
9.98397	19.9689	49.9215	0.5
9.99229	19.9414	49.9631	0.5
10.0006	19.9169	50.0047	0.5
10.0089	19.8935	50.0463	0.5
10.0173	19.8782	50.0879	0.5
10.0256	19.8562	50.1295	0.5
10.0339	19.8342	50.1711	0.5
10.0422	19.8167	50.2127	0.5
10.0505	19.8015	50.2543	0.5
10.0589	19.7863	50.2959	0.5
10.0672	19.7656	50.3375	0.5
10.0755	19.7508	50.3791	0.5
10.0838	19.7277	50.4207	0.5
10.0921	19.7124	50.4623	0.5
10.1005	19.7008	50.5039	0.5
10.1088	19.6788	50.5455	0.5
10.1171	19.6587	50.5871	0.5
10.1254	19.6383	50.6287	0.5
10.1337	19.6236	50.6703	0.5
10.1421	19.6073	50.7119	0.5
10.1504	19.5877	50.7535	0.5
10.1587	19.5709	50.7951	0.5
10.167	19.5515	50.8367	0.5
10.1753	19.5334	50.8783	0.5
10.1837	19.5151	50.9199	0.5
10.192	19.4962	50.9615	0.5
10.2003	19.4754	51.0031	0.5
10.2086	19.4597	51.0447	0.5
10.2169	19.4452	51.0863	0.5
10.2253	19.4269	51.1279	0.5
10.2336	19.4105	51.1695	0.5
10.2419	19.3895	51.2112	0.5
10.2502	19.3716	51.2527	0.5
10.2585	19.3593	51.2944	0.5
10.2669	19.3431	51.336	0.5
10.2752	19.3236	51.3776	0.5
10.2835	19.3036	51.4192	0.5
10.2918	19.2895	51.4608	0.5
10.3001	19.2674	51.5024	0.5
10.3085	19.2438	51.544	0.5
10.3168	19.2248	51.5856	0.5
10.3251	19.2032	51.6272	0.5
10.3334	19.1897	51.6688	0.5
10.3417	19.1723	51.7104	0.5
10.3501	19.1588	51.752	0.5
10.3584	19.1407	51.7936	0.5
10.3667	19.1199	51.8352	0.5
10.375	19.1006	51.8768	0.5
10.3833	19.0807	51.9184	0.5
10.3917	19.0659	51.96	0.5
10.4	19.0464	52.0016	0.5
10.4083	19.027	52.0432	0.5
10.4166	19.0075	52.0848	0.5
10.4249	18.9875	52.1264	0.5
10.4333	18.9702	52.168	0.5
10.4416	18.9502	52.2096	0.5
10.4499	18.9293	52.2512	0.5
10.4582	18.9031	52.2928	0.5
10.4665	18.8866	52.3344	0.5
10.4749	18.8727	52.376	0.5
10.4832	18.8493	52.4176	0.5
10.4915	18.8278	52.4592	0.5
10.4998	18.8145	52.5008	0.5
10.5081	18.8024	52.5424	0.5
10.5165	18.7874	52.584	0.5
10.5248	18.7701	52.6256	0.5
10.5331	18.7555	52.6672	0.5
10.5414	18.735	52.7088	0.5
10.5497	18.7239	52.7504	0.5
10.5581	18.7143	52.792	0.5
10.5664	18.6976	52.8336	0.5
10.5747	18.6782	52.8752	0.5
10.583	18.6683	52.9168	0.5
10.5913	18.6564	52.9584	0.5
10.5997	18.638	53	0.5
10.608	18.6254	53.0416	0.5
10.6163	18.6061	53.0832	0.5
10.6246	18.5887	53.1248	0.5
10.6329	18.5698	53.1664	0.5
10.6413	18.5516	53.208	0.5
10.6496	18.5334	53.2496	0.5
10.6579	18.5163	53.2912	0.5
10.6662	18.4981	53.3328	0.5
10.6745	18.4755	53.3744	0.5
10.6829	18.4601	53.416	0.5
10.6912	18.4441	53.4576	0.5
10.6995	18.4299	53.4992	0.5
10.7078	18.4127	53.5408	0.5
10.7161	18.3972	53.5824	0.5
10.7245	18.3855	53.624	0.5
10.7328	18.3705	53.6656	0.5
10.7411	18.3556	53.7072	0.5
10.7494	18.3407	53.7488	0.5
10.7577	18.3301	53.7904	0.5
10.7661	18.3155	53.832	0.5
10.7744	18.3037	53.8736	0.5
10.7827	18.2912	53.9152	0.5
10.791	18.272	53.9568	0.5
10.7993	18.2589	53.9984	0.5
10.8077	18.2427	54.04	0.5
10.816	18.2257	54.0816	0.5
10.8243	18.2135	54.1232	0.5
10.8326	18.1956	54.1648	0.5
10.8409	18.1791	54.2064	0.5
10.8493	18.1587	54.248	0.5
10.8576	18.1354	54.2896	0.5
10.8659	18.1126	54.3312	0.5
10.8742	18.0952	54.3728	0.5
10.8825	18.0745	54.4144	0.5
10.8909	18.0582	54.456	0.5
10.8992	18.0436	54.4977	0.5
10.9075	18.0273	54.5392	0.5
10.9158	18.0112	54.5809	0.5
10.9241	17.9947	54.6225	0.5
10.9324	17.9774	54.6641	0.5
10.9408	17.9579	54.7057	0.5
10.9491	17.9428	54.7473	0.5
10.9574	17.9314	54.7889	0.5
10.9657	17.9219	54.8305	0.5
10.9741	17.9076	54.8721	0.5
10.9824	17.8973	54.9137	0.5
10.9907	17.8838	54.9553	0.5
10.999	17.864	54.9969	0.5
11.0073	17.8516	55.0385	0.5
11.0157	17.8396	55.0801	0.5
11.024	17.8262	55.1217	0.5
11.0323	17.8092	55.1633	0.5
11.0406	17.7963	55.2049	0.5
11.0489	17.7784	55.2465	0.5
11.0572	17.7644	55.2881	0.5
11.0656	17.7509	55.3297	0.5
11.0739	17.7352	55.3713	0.5
11.0822	17.7186	55.4129	0.5
11.0905	17.7047	55.4545	0.5
11.0989	17.6957	55.4961	0.5
11.1072	17.686	55.5377	0.520306
11.1155	17.6717	55.5793	0.6
11.1238	17.6582	55.6209	0.6
11.1321	17.6479	55.6625	0.6
11.1404	17.6345	55.7041	0.6
11.1488	17.6255	55.7457	0.6
11.1571	17.6101	55.7873	0.6
11.1654	17.5883	55.8289	0.6
11.1737	17.5736	55.8705	0.6
11.1821	17.5579	55.9121	0.6
11.1904	17.5435	55.9537	0.6
11.1987	17.5363	55.9953	0.6
11.207	17.5231	56.0369	0.6
11.2153	17.5081	56.0785	0.6
11.2236	17.4924	56.1201	0.6
11.232	17.4775	56.1617	0.6
11.2403	17.4636	56.2033	0.6
11.2486	17.4517	56.2449	0.6
11.2569	17.4422	56.2865	0.6
11.2652	17.4263	56.3281	0.6
11.2736	17.4126	56.3697	0.6
11.2819	17.3974	56.4113	0.6
11.2902	17.3833	56.4529	0.6
11.2985	17.3722	56.4945	0.6
11.3068	17.3602	56.5361	0.6
11.3152	17.3445	56.5777	0.6
11.3235	17.3275	56.6193	0.6
11.3318	17.3113	56.6609	0.6
11.3401	17.2929	56.7025	0.6
11.3484	17.2756	56.7441	0.6
11.3568	17.2538	56.7857	0.6
11.3651	17.2391	56.8273	0.6
11.3734	17.2206	56.8689	0.6
11.3817	17.2067	56.9105	0.6
11.39	17.193	56.9521	0.6
11.3984	17.1759	56.9937	0.6
11.4067	17.1568	57.0353	0.6
11.415	17.1385	57.0769	0.6
11.4233	17.122	57.1185	0.6
11.4316	17.1091	57.1601	0.6
11.44	17.0991	57.2017	0.6
11.4483	17.0857	57.2433	0.6
11.4566	17.0746	57.2849	0.6
11.4649	17.0651	57.3265	0.6
11.4732	17.0562	57.3681	0.6
11.4816	17.0425	57.4097	0.6
11.4899	17.0303	57.4513	0.6
11.4982	17.0149	57.4929	0.6
11.5065	17.0004	57.5345	0.6
11.5148	16.9873	57.5761	0.6
11.5232	16.9749	57.6177	0.6
11.5315	16.9601	57.6593	0.6
11.5398	16.9443	57.7009	0.6
11.5481	16.9313	57.7425	0.6
11.5564	16.9216	57.7841	0.6
11.5648	16.9092	57.8258	0.6
11.5731	16.9015	57.8674	0.6
11.5814	16.8927	57.909	0.6
11.5897	16.8815	57.9506	0.6
11.598	16.8673	57.9922	0.6
11.6064	16.857	58.0338	0.6
11.6147	16.8444	58.0754	0.6
11.623	16.8342	58.117	0.6
11.6313	16.8253	58.1586	0.6
11.6396	16.8132	58.2002	0.6
11.648	16.8	58.2418	0.6
11.6563	16.7898	58.2834	0.6
11.6646	16.7746	58.325	0.6
11.6729	16.759	58.3666	0.6
11.6812	16.744	58.4082	0.6
11.6896	16.7295	58.4498	0.6
11.6979	16.7127	58.4914	0.6
11.7062	16.699	58.533	0.6
11.7145	16.682	58.5746	0.6
11.7228	16.6685	58.6162	0.6
11.7312	16.6517	58.6578	0.6
11.7395	16.6395	58.6994	0.6
11.7478	16.6252	58.741	0.6
11.7561	16.605	58.7826	0.6
11.7644	16.5915	58.8242	0.6
11.7728	16.5772	58.8658	0.6
11.7811	16.564	58.9074	0.6
11.7894	16.5507	58.949	0.6
11.7977	16.5381	58.9906	0.6
11.806	16.5268	59.0322	0.6
11.8144	16.5143	59.0738	0.6
11.8227	16.502	59.1154	0.6
11.831	16.4896	59.157	0.6
11.8393	16.4777	59.1986	0.6
11.8476	16.4683	59.2402	0.6
11.856	16.4575	59.2818	0.6
11.8643	16.4478	59.3234	0.6
11.8726	16.4403	59.365	0.6
11.8809	16.4289	59.4066	0.6
11.8892	16.4174	59.4482	0.6
11.8976	16.4063	59.4898	0.6
11.9059	16.3922	59.5314	0.6
11.9142	16.3807	59.573	0.6
11.9225	16.3669	59.6146	0.6
11.9308	16.3532	59.6562	0.6
11.9392	16.3453	59.6978	0.6
11.9475	16.3358	59.7394	0.6
11.9558	16.3235	59.781	0.6
11.9641	16.3143	59.8226	0.6
11.9724	16.3017	59.8642	0.6
11.9808	16.2913	59.9058	0.6
11.9891	16.2827	59.9474	0.6
11.9974	16.2741	59.989	0.6
12.0057	16.269	60.0306	0.6
12.014	16.2631	60.0722	0.6
12.0224	16.2521	60.1138	0.6
12.0307	16.2443	60.1554	0.6
12.039	16.2351	60.197	0.6
12.0473	16.2261	60.2386	0.6
12.0556	16.2132	60.2802	0.6
12.064	16.2033	60.3218	0.6
12.0723	16.1922	60.3634	0.6
12.0806	16.1808	60.405	0.6
12.0889	16.171	60.4466	0.6
12.0972	16.1565	60.4882	0.6
12.1056	16.1446	60.5298	0.6
12.1139	16.1356	60.5714	0.6
12.1222	16.126	60.613	0.6
12.1305	16.1143	60.6546	0.6
12.1388	16.1025	60.6962	0.6
12.1472	16.0912	60.7378	0.6
12.1555	16.0816	60.7794	0.6
12.1638	16.0712	60.821	0.6
12.1721	16.0563	60.8626	0.6
12.1804	16.0436	60.9042	0.6
12.1888	16.0304	60.9458	0.6
12.1971	16.0185	60.9874	0.6
12.2054	16.0094	61.029	0.6
12.2137	15.995	61.0706	0.6
12.222	15.9829	61.1123	0.6
12.2304	15.9733	61.1539	0.6
12.2387	15.9634	61.1955	0.6
12.247	15.9531	61.2371	0.6
12.2553	15.9411	61.2787	0.6
12.2636	15.9338	61.3203	0.6
12.272	15.9259	61.3619	0.6
12.2803	15.9174	61.4035	0.6
12.2886	15.9062	61.4451	0.6
12.2969	15.897	61.4867	0.6
12.3052	15.8858	61.5283	0.6
12.3136	15.877	61.5699	0.6
12.3219	15.868	61.6115	0.6
12.3302	15.8619	61.6531	0.6
12.3385	15.8511	61.6947	0.6
12.3468	15.8408	61.7363	0.6
12.3552	15.8308	61.7779	0.6
12.3635	15.8203	61.8195	0.6
12.3718	15.8092	61.8611	0.6
12.3801	15.8003	61.9027	0.6
12.3884	15.793	61.9443	0.6
12.3968	15.7869	61.9859	0.6
12.4051	15.779	62.0275	0.6
12.4134	15.7683	62.0691	0.6
12.4217	15.7602	62.1107	0.6
12.43	15.7511	62.1523	0.6
12.4384	15.7432	62.1939	0.6
12.4467	15.7337	62.2355	0.6
12.455	15.7241	62.2771	0.6
12.4633	15.7183	62.3187	0.6
12.4716	15.7092	62.3603	0.6
12.48	15.7015	62.4019	0.6
12.4883	15.6975	62.4435	0.6
12.4966	15.6927	62.4851	0.6
12.5049	15.6837	62.5267	0.6
12.5132	15.6799	62.5683	0.6
12.5216	15.6766	62.6099	0.6
12.5299	15.6713	62.6515	0.6
12.5382	15.6668	62.6931	0.6
12.5465	15.6633	62.7347	0.6
12.5548	15.6593	62.7763	0.6
12.5632	15.6527	62.8179	0.6
12.5715	15.6475	62.8595	0.6
12.5798	15.6416	62.9011	0.6
12.5881	15.6328	62.9427	0.6
12.5964	15.6229	62.9843	0.6
12.6048	15.6152	63.0259	0.6
12.6131	15.6089	63.0675	0.6
12.6214	15.6008	63.1091	0.6
12.6297	15.5932	63.1507	0.6
12.638	15.5847	63.1923	0.6
12.6464	15.574	63.2339	0.6
12.6547	15.5666	63.2755	0.6
12.663	15.5573	63.3171	0.6
12.6713	15.5485	63.3587	0.6
12.6796	15.5423	63.4003	0.6
12.688	15.5383	63.4419	0.6
12.6963	15.5328	63.4835	0.6
12.7046	15.5252	63.5251	0.6
12.7129	15.5178	63.5667	0.6
12.7212	15.51	63.6083	0.6
12.7296	15.505	63.6499	0.6
12.7379	15.4977	63.6915	0.6
12.7462	15.4923	63.7331	0.6
12.7545	15.4888	63.7747	0.6
12.7628	15.4852	63.8163	0.6
12.7712	15.4835	63.8579	0.6
12.7795	15.4787	63.8995	0.6
12.7878	15.4745	63.9411	0.6
12.7961	15.4692	63.9827	0.6
12.8044	15.4669	64.0243	0.6
12.8128	15.4633	64.0659	0.6
12.8211	15.4583	64.1075	0.6
12.8294	15.4542	64.1491	0.6
12.8377	15.4506	64.1907	0.6
12.846	15.449	64.2323	0.6
12.8544	15.4462	64.2739	0.6
12.8627	15.4391	64.3155	0.6
12.871	15.4344	64.3571	0.6
12.8793	15.4305	64.3988	0.6
12.8876	15.4224	64.4404	0.6
12.896	15.4156	64.4819	0.6
12.9043	15.41	64.5236	0.6
12.9126	15.4039	64.5652	0.6
12.9209	15.3993	64.6068	0.6
12.9292	15.3926	64.6484	0.6
12.9376	15.3854	64.69	0.6
12.9459	15.3777	64.7316	0.6
12.9542	15.3699	64.7732	0.6
12.9625	15.3648	64.8148	0.6
12.9708	15.3612	64.8564	0.6
12.9792	15.3562	64.898	0.6
12.9875	15.3498	64.9396	0.6
12.9958	15.3443	64.9812	0.6
13.0041	15.3379	65.0228	0.6
13.0124	15.3309	65.0644	0.6
13.0208	15.3247	65.106	0.6
13.0291	15.3204	65.1476	0.6
13.0374	15.3158	65.1892	0.6
13.0457	15.3126	65.2308	0.6
13.054	15.3075	65.2724	0.6
13.0624	15.3009	65.314	0.6
13.0707	15.2965	65.3556	0.6
13.079	15.2901	65.3972	0.6
13.0873	15.2835	65.4388	0.6
13.0956	15.2775	65.4804	0.6
13.104	15.2742	65.522	0.6
13.1123	15.2686	65.5636	0.6
13.1206	15.2635	65.6052	0.6
13.1289	15.2597	65.6468	0.6
13.1372	15.2565	65.6884	0.6
13.1456	15.2507	65.73	0.6
13.1539	15.2435	65.7716	0.6
13.1622	15.2406	65.8132	0.6
13.1705	15.2367	65.8548	0.6
13.1788	15.2331	65.8964	0.6
13.1872	15.2321	65.938	0.6
13.1955	15.2306	65.9796	0.6
13.2038	15.2275	66.0212	0.6
13.2121	15.2271	66.0628	0.6
13.2204	15.2272	66.1044	0.6
13.2288	15.225	66.146	0.6
13.2371	15.2225	66.1876	0.6
13.2454	15.2197	66.2292	0.6
13.2537	15.2202	66.2708	0.6
13.262	15.2205	66.3124	0.6
13.2704	15.2209	66.354	0.6
13.2787	15.2193	66.3956	0.6
13.287	15.2172	66.4372	0.6
13.2953	15.2163	66.4788	0.6
13.3036	15.2126	66.5204	0.6
13.312	15.2075	66.562	0.6
13.3203	15.2024	66.6036	0.6
13.3286	15.1998	66.6452	0.6
13.3369	15.1985	66.6868	0.6
13.3452	15.1954	66.7284	0.6
13.3536	15.192	66.77	0.6
13.3619	15.1895	66.8116	0.6
13.3702	15.1859	66.8532	0.6
13.3785	15.1844	66.8948	0.6
13.3868	15.1839	66.9364	0.6
13.3952	15.1827	66.978	0.6
13.4035	15.1806	67.0196	0.6
13.4118	15.1793	67.0612	0.6
13.4201	15.1795	67.1028	0.6
13.4284	15.1792	67.1444	0.6
13.4368	15.1789	67.186	0.6
13.4451	15.1795	67.2276	0.6
13.4534	15.1812	67.2692	0.6
13.4617	15.1814	67.3108	0.6
13.47	15.1798	67.3524	0.6
13.4784	15.175	67.394	0.6
13.4867	15.1721	67.4356	0.6
13.495	15.1707	67.4772	0.6
13.5033	15.1702	67.5188	0.6
13.5116	15.1722	67.5604	0.6
13.52	15.1714	67.602	0.6
13.5283	15.1689	67.6436	0.6
13.5366	15.1664	67.6852	0.6
13.5449	15.1642	67.7269	0.6
13.5532	15.1639	67.7684	0.6
13.5616	15.1632	67.8101	0.6
13.5699	15.161	67.8517	0.6
13.5782	15.1604	67.8933	0.6
13.5865	15.159	67.9349	0.6
13.5948	15.1572	67.9765	0.6
13.6032	15.1568	68.0181	0.6
13.6115	15.1547	68.0597	0.6
13.6198	15.1503	68.1013	0.6
13.6281	15.1457	68.1429	0.6
13.6364	15.1431	68.1845	0.6
13.6448	15.1433	68.2261	0.6
13.6531	15.1418	68.2677	0.6
13.6614	15.1386	68.3093	0.6
13.6697	15.138	68.3509	0.6
13.678	15.1392	68.3925	0.6
13.6864	15.1406	68.4341	0.6
13.6947	15.142	68.4757	0.6
13.703	15.1418	68.5173	0.6
13.7113	15.1405	68.5589	0.6
13.7196	15.1407	68.6005	0.6
13.728	15.1451	68.6421	0.6
13.7363	15.1487	68.6837	0.6
13.7446	15.1482	68.7253	0.6
13.7529	15.1473	68.7669	0.6
13.7612	15.1468	68.8085	0.6
13.7696	15.1475	68.8501	0.6
13.7779	15.1475	68.8917	0.6
13.7862	15.1444	68.9333	0.6
13.7945	15.143	68.9749	0.6
13.8028	15.1428	69.0165	0.6
13.8112	15.1439	69.0581	0.6
13.8195	15.1462	69.0997	0.6
13.8278	15.147	69.1413	0.6
13.8361	15.147	69.1829	0.6
13.8444	15.1476	69.2245	0.6
13.8528	15.1508	69.2661	0.6
13.8611	15.1539	69.3077	0.6
13.8694	15.1552	69.3493	0.6
13.8777	15.1567	69.3909	0.6
13.886	15.1593	69.4325	0.6
13.8944	15.157	69.4741	0.6
13.9027	15.1524	69.5157	0.6
13.911	15.1516	69.5573	0.6
13.9193	15.1517	69.5989	0.6
13.9276	15.1503	69.6405	0.6
13.936	15.1489	69.6821	0.6
13.9443	15.1518	69.7237	0.6
13.9526	15.1531	69.7653	0.6
13.9609	15.1529	69.8069	0.6
13.9692	15.1543	69.8485	0.6
13.9776	15.1553	69.8901	0.6
13.9859	15.1572	69.9317	0.6
13.9942	15.1593	69.9733	0.6
14.0025	15.1623	70.0149	0.6
14.0108	15.1629	70.0565	0.6
14.0192	15.1617	70.0981	0.6
14.0275	15.1622	70.1397	0.6
14.0358	15.1637	70.1813	0.6
14.0441	15.1659	70.2229	0.6
14.0524	15.167	70.2645	0.6
14.0608	15.1661	70.3061	0.6
14.0691	15.1645	70.3477	0.6
14.0774	15.1622	70.3893	0.6
14.0857	15.1606	70.4309	0.6
14.094	15.162	70.4725	0.6
14.1024	15.1654	70.5141	0.6
14.1107	15.1675	70.5557	0.6
14.119	15.1698	70.5973	0.6
14.1273	15.1729	70.6389	0.6
14.1356	15.1748	70.6805	0.6
14.144	15.1759	70.7221	0.6
14.1523	15.1765	70.7637	0.6
14.1606	15.1785	70.8053	0.6
14.1689	15.1831	70.8469	0.6
14.1772	15.1887	70.8885	0.6
14.1856	15.1918	70.9301	0.6
14.1939	15.1928	70.9717	0.6
14.2022	15.1943	71.0134	0.6
14.2105	15.1955	71.055	0.6
14.2188	15.1958	71.0965	0.6
14.2272	15.1965	71.1382	0.6
14.2355	15.197	71.1798	0.6
14.2438	15.196	71.2214	0.6
14.2521	15.1994	71.263	0.6
14.2604	15.2048	71.3046	0.6
14.2688	15.2074	71.3462	0.6
14.2771	15.2064	71.3878	0.6
14.2854	15.207	71.4294	0.6
14.2937	15.2125	71.471	0.6
14.302	15.2166	71.5126	0.6
14.3104	15.2206	71.5542	0.6
14.3187	15.2271	71.5958	0.6
14.327	15.2361	71.6374	0.6
14.3353	15.2417	71.679	0.6
14.3436	15.2466	71.7206	0.6
14.352	15.2523	71.7622	0.6
14.3603	15.2564	71.8038	0.6
14.3686	15.2604	71.8454	0.6
14.3769	15.2664	71.887	0.6
14.3852	15.2737	71.9286	0.6
14.3936	15.2804	71.9702	0.6
14.4019	15.2881	72.0118	0.6
14.4102	15.2947	72.0534	0.6
14.4185	15.2973	72.095	0.6
14.4268	15.3005	72.1366	0.6
14.4352	15.3029	72.1782	0.6
14.4435	15.307	72.2198	0.6
14.4518	15.3128	72.2614	0.6
14.4601	15.3165	72.303	0.6
14.4684	15.3206	72.3446	0.6
14.4768	15.3256	72.3862	0.6
14.4851	15.3258	72.4278	0.6
14.4934	15.3236	72.4694	0.6
14.5017	15.3242	72.511	0.6
14.51	15.3271	72.5526	0.6
14.5184	15.3317	72.5942	0.6
14.5267	15.3346	72.6358	0.6
14.535	15.3381	72.6774	0.6
14.5433	15.3419	72.719	0.6
14.5516	15.346	72.7606	0.6
14.56	15.3508	72.8022	0.6
14.5683	15.3552	72.8438	0.6
14.5766	15.3602	72.8854	0.6
14.5849	15.3655	72.927	0.6
14.5932	15.3741	72.9686	0.6
14.6016	15.3847	73.0102	0.6
14.6099	15.3929	73.0518	0.6
14.6182	15.3975	73.0934	0.6
14.6265	15.4024	73.135	0.6
14.6348	15.4076	73.1766	0.6
14.6432	15.4143	73.2182	0.6
14.6515	15.4197	73.2598	0.6
14.6598	15.4231	73.3014	0.6
14.6681	15.4276	73.343	0.6
14.6764	15.4361	73.3846	0.6
14.6848	15.4443	73.4262	0.6
14.6931	15.4495	73.4678	0.6
14.7014	15.4551	73.5094	0.6
14.7097	15.4577	73.551	0.6
14.718	15.4625	73.5926	0.6
14.7264	15.4687	73.6342	0.6
14.7347	15.4706	73.6758	0.6
14.743	15.4743	73.7174	0.6
14.7513	15.4801	73.759	0.6
14.7596	15.4862	73.8006	0.6
14.768	15.4923	73.8422	0.6
14.7763	15.4958	73.8838	0.6
14.7846	15.4995	73.9254	0.6
14.7929	15.503	73.967	0.6
14.8012	15.5072	74.0086	0.6
14.8096	15.5099	74.0502	0.6
14.8179	15.5144	74.0918	0.6
14.8262	15.5186	74.1334	0.6
14.8345	15.5239	74.175	0.6
14.8428	15.5308	74.2166	0.6
14.8512	15.5354	74.2582	0.6
14.8595	15.5394	74.2999	0.6
14.8678	15.5402	74.3415	0.6
14.8761	15.5406	74.383	0.6
14.8844	15.5427	74.4247	0.6
14.8928	15.5452	74.4663	0.6
14.9011	15.5498	74.5079	0.6
14.9094	15.5548	74.5495	0.6
14.9177	15.5595	74.5911	0.6
14.926	15.5631	74.6327	0.6
14.9344	15.5674	74.6743	0.6
14.9427	15.5718	74.7159	0.6
14.951	15.5755	74.7575	0.6
14.9593	15.5778	74.7991	0.6
14.9676	15.583	74.8407	0.6
14.976	15.5903	74.8823	0.6
14.9843	15.597	74.9239	0.6
14.9926	15.603	74.9655	0.6
15.0009	15.6089	75.0071	0.6
15.0092	15.6191	75.0487	0.6
15.0176	15.6291	75.0903	0.6
15.0259	15.6367	75.1319	0.6
15.0342	15.6443	75.1735	0.6
15.0425	15.6546	75.2151	0.6
15.0508	15.6613	75.2567	0.6
15.0592	15.6706	75.2983	0.6
15.0675	15.6798	75.3399	0.6
15.0758	15.6886	75.3815	0.6
15.0841	15.6965	75.4231	0.6
15.0924	15.7021	75.4647	0.6
15.1008	15.708	75.5063	0.6
15.1091	15.7175	75.5479	0.6
15.1174	15.7246	75.5895	0.6
15.1257	15.7318	75.6311	0.6
15.134	15.7401	75.6727	0.6
15.1424	15.7451	75.7143	0.6
15.1507	15.7538	75.7559	0.6
15.159	15.762	75.7975	0.6
15.1673	15.7697	75.8391	0.6
15.1756	15.7771	75.8807	0.6
15.184	15.781	75.9223	0.6
15.1923	15.7869	75.9639	0.6
15.2006	15.794	76.0055	0.6
15.2089	15.7982	76.0471	0.6
15.2172	15.8011	76.0887	0.6
15.2256	15.8048	76.1303	0.6
15.2339	15.8103	76.1719	0.6
15.2422	15.8121	76.2135	0.6
15.2505	15.8117	76.2551	0.6
15.2588	15.8145	76.2967	0.6
15.2672	15.8196	76.3383	0.6
15.2755	15.8266	76.3799	0.6
15.2838	15.8345	76.4215	0.6
15.2921	15.8392	76.4631	0.6
15.3004	15.8449	76.5047	0.6
15.3088	15.8519	76.5463	0.6
15.3171	15.8618	76.5879	0.6
15.3254	15.8703	76.6295	0.6
15.3337	15.8766	76.6711	0.6
15.342	15.8872	76.7127	0.6
15.3504	15.8978	76.7543	0.6
15.3587	15.9033	76.7959	0.6
15.367	15.9102	76.8375	0.6
15.3753	15.9157	76.8791	0.6
15.3836	15.9224	76.9207	0.6
15.392	15.9277	76.9623	0.6
15.4003	15.9344	77.0039	0.6
15.4086	15.9397	77.0455	0.6
15.4169	15.9464	77.0871	0.6
15.4252	15.9537	77.1287	0.6
15.4336	15.9612	77.1703	0.6
15.4419	15.967	77.2119	0.6
15.4502	15.9742	77.2535	0.6
15.4585	15.9811	77.2951	0.6
15.4668	15.9892	77.3367	0.6
15.4752	15.9962	77.3783	0.6
15.4835	15.9994	77.4199	0.6
15.4918	16.0069	77.4615	0.6
15.5001	16.0146	77.5031	0.6
15.5084	16.0217	77.5447	0.6
15.5168	16.0269	77.5863	0.6
15.5251	16.0303	77.628	0.6
15.5334	16.034	77.6695	0.6
15.5417	16.0443	77.7112	0.6
15.55	16.0524	77.7528	0.6
15.5584	16.061	77.7944	0.6
15.5667	16.0689	77.836	0.6
15.575	16.0758	77.8776	0.6
15.5833	16.0838	77.9192	0.6
15.5916	16.0906	77.9608	0.6
15.6	16.0989	78.0024	0.6
15.6083	16.1055	78.044	0.6
15.6166	16.1118	78.0856	0.6
15.6249	16.1196	78.1272	0.6
15.6332	16.1286	78.1688	0.6
15.6416	16.1352	78.2104	0.6
15.6499	16.1384	78.252	0.6
15.6582	16.1423	78.2936	0.6
15.6665	16.1492	78.3352	0.6
15.6748	16.1561	78.3768	0.6
15.6832	16.1633	78.4184	0.6
15.6915	16.1698	78.46	0.6
15.6998	16.179	78.5016	0.6
15.7081	16.1879	78.5432	0.6
15.7164	16.1957	78.5848	0.6
15.7248	16.2018	78.6264	0.6
15.7331	16.2053	78.668	0.6
15.7414	16.2087	78.7096	0.6
15.7497	16.2136	78.7512	0.6
15.758	16.2219	78.7928	0.6
15.7664	16.2293	78.8344	0.6
15.7747	16.2325	78.876	0.6
15.783	16.2356	78.9176	0.6
15.7913	16.2453	78.9592	0.6
15.7996	16.2538	79.0008	0.6
15.808	16.2611	79.0424	0.6
15.8163	16.27	79.084	0.6
15.8246	16.2749	79.1256	0.6
15.8329	16.2798	79.1672	0.6
15.8412	16.2843	79.2088	0.6
15.8496	16.2908	79.2504	0.6
15.8579	16.2982	79.292	0.6
15.8662	16.3038	79.3336	0.6
15.8745	16.3123	79.3752	0.6
15.8828	16.3215	79.4168	0.6
15.8912	16.3233	79.4584	0.6
15.8995	16.3278	79.5	0.6
15.9078	16.3302	79.5416	0.6
15.9161	16.3341	79.5832	0.6
15.9244	16.3387	79.6248	0.6
15.9328	16.3465	79.6664	0.6
15.9411	16.352	79.708	0.6
15.9494	16.357	79.7496	0.6
15.9577	16.3615	79.7912	0.6
15.966	16.3651	79.8328	0.6
15.9744	16.371	79.8744	0.6
15.9827	16.3745	79.916	0.6
15.991	16.3821	79.9576	0.6
15.9993	16.389	79.9992	0.6
16.0076	16.3928	80.0408	0.6
16.016	16.4001	80.0824	0.6
16.0243	16.4082	80.124	0.6
16.0326	16.4145	80.1656	0.6
16.0409	16.4189	80.2072	0.6
16.0492	16.4257	80.2488	0.6
16.0576	16.431	80.2904	0.6
16.0659	16.4359	80.332	0.6
16.0742	16.4425	80.3736	0.6
16.0825	16.4507	80.4152	0.6
16.0908	16.4537	80.4568	0.6
16.0992	16.4583	80.4984	0.6
16.1075	16.4605	80.54	0.6
16.1158	16.465	80.5816	0.6
16.1241	16.469	80.6232	0.6
16.1324	16.4764	80.6648	0.6
16.1408	16.4851	80.7064	0.6
16.1491	16.4904	80.748	0.6
16.1574	16.4945	80.7896	0.605605
16.1657	16.5	80.8312	0.616517
16.174	16.5087	80.8728	0.628671
16.1824	16.5134	80.9145	0.640834
16.1907	16.5188	80.956	0.653012
16.199	16.5304	80.9976	0.665182
16.2073	16.5442	81.0393	0.677335
16.2156	16.5517	81.0809	0.68949
16.224	16.5576	81.1225	0.701666
16.2323	16.564	81.1641	0.713836
16.2406	16.5702	81.2057	0.726002
16.2489	16.5759	81.2473	0.738157
16.2572	16.5838	81.2889	0.750317
16.2656	16.5901	81.3305	0.76249
16.2739	16.5925	81.3721	0.774661
16.2822	16.5952	81.4137	0.786814
16.2905	16.6009	81.4553	0.798977
16.2988	16.6038	81.4969	0.811159
16.3072	16.6061	81.5385	0.823328
16.3155	16.605	81.5801	0.835493
16.3238	16.6089	81.6217	0.847644
16.3321	16.6113	81.6633	0.859804
16.3404	16.614	81.7049	0.871984
16.3488	16.6184	81.7465	0.884156
16.3571	16.6209	81.7881	0.89631
16.3654	16.623	81.8297	0.908462
16.3737	16.6258	81.8713	0.92064
16.382	16.6292	81.9129	0.932806
16.3904	16.6311	81.9545	0.944958
16.3987	16.6342	81.9961	0.957122
16.407	16.6373	82.0377	0.969304
16.4153	16.6427	82.0793	0.981475
16.4236	16.647	82.1209	0.993638
16.432	16.6507	82.1625	1.00579
16.4403	16.6565	82.2041	1.01795
16.4486	16.657	82.2457	1.03013
16.4569	16.662	82.2873	1.0423
16.4652	16.6638	82.3289	1.05445
16.4736	16.6668	82.3705	1.06661
16.4819	16.6677	82.4121	1.07878
16.4902	16.6725	82.4537	1.09096
16.4985	16.6783	82.4953	1.10311
16.5068	16.6823	82.5369	1.11527
16.5152	16.6901	82.5785	1.12744
16.5235	16.695	82.6201	1.13962
16.5318	16.7008	82.6617	1.15178
16.5401	16.7027	82.7033	1.16393
16.5484	16.7101	82.7449	1.17609
16.5568	16.7122	82.7865	1.18827
16.5651	16.7165	82.8281	1.20044
16.5734	16.7189	82.8697	1.2126
16.5817	16.7221	82.9113	1.22475
16.59	16.7258	82.9529	1.23693
16.5984	16.7263	82.9945	1.2491
16.6067	16.7277	83.0361	1.26125
16.615	16.7288	83.0777	1.27342
16.6233	16.7314	83.1193	1.28559
[truncated: 28,107 more rows]

## Sheet: AIEX
Volume (mL)	Abs 280 nm (mAU)	Volume (mL)	%B
-4.90343	0	-4.90343	0
-4.90176	0.002441	-4.88679	0
-4.9001	0.003077	-4.87016	0
-4.89844	0.003587	-4.85353	0
-4.89677	0.003741	-4.8369	0
-4.89511	0.004046	-4.82026	0
-4.89345	0.003945	-4.80363	0
-4.89179	0.00342	-4.787	0
-4.89012	0.002596	-4.77037	0
-4.88846	0.001532	-4.75374	0
-4.8868	0.001604	-4.7371	0
-4.88513	0.002015	-4.72047	0
-4.88347	0.005438	-4.70384	0
-4.88181	0.014809	-4.68721	0
-4.88014	0.01997	-4.67057	0
-4.87848	0.020613	-4.65394	0
-4.87682	0.020521	-4.63731	0
-4.87515	0.020124	-4.62068	0
-4.87349	0.020377	-4.60405	0
-4.87183	0.021104	-4.58741	0
-4.87017	0.021196	-4.57078	0
-4.8685	0.020959	-4.55415	0
-4.86684	0.020089	-4.53752	0
-4.86518	0.01966	-4.52088	0
-4.86351	0.01927	-4.50425	0
-4.86185	0.018411	-4.48762	0
-4.86019	0.017157	-4.47099	0
-4.85852	0.015642	-4.45435	0
-4.85686	0.014591	-4.43772	0
-4.8552	0.014552	-4.42109	0
-4.85354	0.014215	-4.40446	0
-4.85187	0.013665	-4.38783	0
-4.85021	0.012974	-4.37119	0
-4.84855	0.012558	-4.35456	0
-4.84688	0.011969	-4.33793	0
-4.84522	0.011111	-4.3213	0
-4.84356	0.010427	-4.30466	0
-4.84189	0.008909	-4.28803	0
-4.84023	0.003358	-4.2714	0
-4.83857	-0.00053	-4.25477	0
-4.83691	-0.00211	-4.23813	0
-4.83524	-0.00302	-4.2215	0
-4.83358	-0.00316	-4.20487	0
-4.83192	-0.00371	-4.18824	0
-4.83025	-0.00421	-4.17161	0
-4.82859	-0.00478	-4.15497	0
-4.82693	-0.00528	-4.13834	0
-4.82526	-0.00614	-4.12171	0
-4.8236	-0.00702	-4.10508	0
-4.82194	-0.0076	-4.08844	0
-4.82027	-0.00826	-4.07181	0
-4.81861	-0.00904	-4.05518	0
-4.81695	-0.01	-4.03855	0
-4.81529	-0.0107	-4.02192	0
-4.81362	-0.01133	-4.00528	0
-4.81196	-0.01241	-3.98865	0
-4.8103	-0.01315	-3.97202	0
-4.80863	-0.01355	-3.95539	0
-4.80697	-0.01436	-3.93875	0
-4.80531	-0.01464	-3.92212	0
-4.80364	-0.01499	-3.90549	0
-4.80198	-0.01594	-3.88886	0
-4.80032	-0.01669	-3.87222	0
-4.79866	-0.01711	-3.85559	0
-4.79699	-0.01734	-3.83896	0
-4.79533	-0.01732	-3.82233	0
-4.79367	-0.01675	-3.8057	0
-4.792	-0.01627	-3.78906	0
-4.79034	-0.01627	-3.77243	0
-4.78868	-0.0169	-3.7558	0
-4.78701	-0.01767	-3.73917	0
-4.78535	-0.0181	-3.72253	0
-4.78369	-0.01879	-3.7059	0
-4.78203	-0.01978	-3.68927	0
-4.78036	-0.01994	-3.67264	0
-4.7787	-0.01931	-3.65601	0
-4.77704	-0.01898	-3.63937	0
-4.77537	-0.01889	-3.62274	0
-4.77371	-0.01888	-3.60611	0
-4.77205	-0.01898	-3.58948	0
-4.77038	-0.01935	-3.57284	0
-4.76872	-0.01905	-3.55621	0
-4.76706	-0.01803	-3.53958	0
-4.7654	-0.01765	-3.52295	0
-4.76373	-0.01702	-3.50631	0
-4.76207	-0.01633	-3.48968	0
-4.76041	-0.01637	-3.47305	0
-4.75874	-0.01602	-3.45642	0
-4.75708	-0.01574	-3.43979	0
-4.75542	-0.01597	-3.42315	0
-4.75375	-0.01544	-3.40652	0
-4.75209	-0.0148	-3.38989	0
-4.75043	-0.01515	-3.37326	0
-4.74876	-0.01541	-3.35662	0
-4.7471	-0.01538	-3.33999	0
-4.74544	-0.01529	-3.32336	0
-4.74378	-0.0152	-3.30673	0
-4.74211	-0.01512	-3.2901	0
-4.74045	-0.01472	-3.27346	0
-4.73879	-0.01443	-3.25683	0
-4.73712	-0.01383	-3.2402	0
-4.73546	-0.01274	-3.22357	0
-4.7338	-0.01167	-3.20693	0
-4.73213	-0.0112	-3.1903	0
-4.73047	-0.01088	-3.17367	0
-4.72881	-0.00958	-3.15704	0
-4.72715	-0.00878	-3.1404	0
-4.72548	-0.00876	-3.12377	0
-4.72382	-0.00838	-3.10714	0
-4.72216	-0.00836	-3.09051	0
-4.72049	-0.00851	-3.07388	0
-4.71883	-0.00815	-3.05724	0
-4.71717	-0.00794	-3.04061	0
-4.7155	-0.00801	-3.02398	0
-4.71384	-0.00817	-3.00735	0
-4.71218	-0.00827	-2.99071	0
-4.71052	-0.00876	-2.97408	0
-4.70885	-0.00884	-2.95745	0
-4.70719	-0.00888	-2.94082	0
-4.70553	-0.00932	-2.92418	0
-4.70386	-0.00896	-2.90755	0
-4.7022	-0.00856	-2.89092	0
-4.70054	-0.00792	-2.87429	0
-4.69887	-0.00746	-2.85766	0
-4.69721	-0.00819	-2.84102	0
-4.69555	-0.00835	-2.82439	0
-4.69388	-0.00833	-2.80776	0
-4.69222	-0.00879	-2.79113	0
-4.69056	-0.00872	-2.77449	0
-4.6889	-0.00824	-2.75786	0
-4.68723	-0.00888	-2.74123	0
-4.68557	-0.00934	-2.7246	0
-4.68391	-0.00968	-2.70797	0
-4.68224	-0.00961	-2.69133	0
-4.68058	-0.00923	-2.6747	0
-4.67892	-0.00935	-2.65807	0
-4.67725	-0.00899	-2.64144	0
-4.67559	-0.00879	-2.6248	0
-4.67393	-0.00929	-2.60817	0
-4.67227	-0.00899	-2.59154	0
-4.6706	-0.0088	-2.57491	0
-4.66894	-0.00879	-2.55827	0
-4.66728	-0.00848	-2.54164	0
-4.66561	-0.00813	-2.52501	0
-4.66395	-0.00814	-2.50838	0
-4.66229	-0.00828	-2.49175	0
-4.66062	-0.0087	-2.47511	0
-4.65896	-0.00881	-2.45848	0
-4.6573	-0.00849	-2.44185	0
-4.65564	-0.00813	-2.42522	0
-4.65397	-0.00758	-2.40858	0
-4.65231	-0.00792	-2.39195	0
-4.65065	-0.00879	-2.37532	0
-4.64898	-0.00925	-2.35869	0
-4.64732	-0.00919	-2.34206	0
-4.64566	-0.00947	-2.32542	0
-4.64399	-0.00987	-2.30879	0
-4.64233	-0.00972	-2.29216	0
-4.64067	-0.00899	-2.27553	0
-4.63901	-0.00884	-2.25889	0
-4.63734	-0.00901	-2.24226	0
-4.63568	-0.00898	-2.22563	0
-4.63402	-0.0093	-2.209	0
-4.63235	-0.01011	-2.19236	0
-4.63069	-0.0103	-2.17573	0
-4.62903	-0.00967	-2.1591	0
-4.62736	-0.00881	-2.14247	0
-4.6257	-0.00907	-2.12584	0
-4.62404	-0.00957	-2.1092	0
-4.62238	-0.00958	-2.09257	0
-4.62071	-0.01065	-2.07594	0
-4.61905	-0.01128	-2.05931	0
-4.61739	-0.0109	-2.04267	0
-4.61572	-0.01046	-2.02604	0
-4.61406	-0.00933	-2.00941	0
-4.6124	-0.00901	-1.99278	0
-4.61073	-0.00902	-1.97615	0
-4.60907	-0.00849	-1.95951	0
-4.60741	-0.00819	-1.94288	0
-4.60574	-0.00854	-1.92625	0
-4.60408	-0.00837	-1.90962	0
-4.60242	-0.00757	-1.89298	0
-4.60076	-0.00771	-1.87635	0
-4.59909	-0.00787	-1.85972	0
-4.59743	-0.00832	-1.84309	0
-4.59577	-0.00793	-1.82645	0
-4.5941	-0.00759	-1.80982	0
-4.59244	-0.0078	-1.79319	0
-4.59078	-0.00697	-1.77656	0
-4.58911	-0.00664	-1.75993	0
-4.58745	-0.00712	-1.74329	0
-4.58579	-0.00748	-1.72666	0
-4.58413	-0.00724	-1.71003	0
-4.58246	-0.00747	-1.6934	0
-4.5808	-0.00778	-1.67676	0
-4.57914	-0.00786	-1.66013	0
-4.57747	-0.00718	-1.6435	0
-4.57581	-0.0069	-1.62687	0
-4.57415	-0.00742	-1.61023	0
-4.57248	-0.00759	-1.5936	0
-4.57082	-0.00764	-1.57697	0
-4.56916	-0.00825	-1.56034	0
-4.56749	-0.00784	-1.54371	0
-4.56583	-0.00714	-1.52707	0
-4.56417	-0.00668	-1.51044	0
-4.56251	-0.00681	-1.49381	0
-4.56084	-0.00648	-1.47718	0
-4.55918	-0.00634	-1.46054	0
-4.55752	-0.0066	-1.44391	0
-4.55585	-0.00614	-1.42728	0
-4.55419	-0.00563	-1.41065	0
-4.55253	-0.0063	-1.39402	0
-4.55086	-0.00576	-1.37738	0
-4.5492	-0.00425	-1.36075	0
-4.54754	-0.00371	-1.34412	0
-4.54588	-0.0044	-1.32749	0
-4.54421	-0.00482	-1.31085	0
-4.54255	-0.00506	-1.29422	0
-4.54089	-0.00542	-1.27759	0
-4.53922	-0.00572	-1.26096	0
-4.53756	-0.00459	-1.24432	0
-4.5359	-0.00421	-1.22769	0
-4.53423	-0.00466	-1.21106	0
-4.53257	-0.00452	-1.19443	0
-4.53091	-0.00455	-1.1778	0
-4.52925	-0.0053	-1.16116	0
-4.52758	-0.00541	-1.14453	0
-4.52592	-0.00445	-1.1279	0
-4.52426	-0.00372	-1.11127	0
-4.52259	-0.00394	-1.09463	0
-4.52093	-0.00298	-1.078	0
-4.51927	-0.00313	-1.06137	0
-4.5176	-0.00276	-1.04474	0
-4.51594	-0.00269	-1.02811	0
-4.51428	-0.00262	-1.01147	0
-4.51262	-0.00317	-0.99484	0
-4.51095	-0.00461	-0.97821	0
-4.50929	-0.00451	-0.96158	0
-4.50763	-0.00454	-0.94494	0
-4.50596	-0.00467	-0.92831	0
-4.5043	-0.00457	-0.91168	0
-4.50264	-0.00448	-0.89505	0
-4.50097	-0.00495	-0.87841	0
-4.49931	-0.00499	-0.86178	0
-4.49765	-0.00457	-0.84515	0
-4.49598	-0.00451	-0.82852	0
-4.49432	-0.00476	-0.81189	0
-4.49266	-0.00472	-0.79525	0
-4.491	-0.00466	-0.77862	0
-4.48933	-0.00478	-0.76199	0
-4.48767	-0.00607	-0.74536	0
-4.48601	-0.00644	-0.72872	0
-4.48434	-0.00698	-0.71209	0
-4.48268	-0.00674	-0.69546	0
-4.48102	-0.0068	-0.67883	0
-4.47935	-0.0066	-0.66219	0
-4.47769	-0.0071	-0.64556	0
-4.47603	-0.00693	-0.62893	0
-4.47437	-0.00691	-0.6123	0
-4.4727	-0.00705	-0.59567	0
-4.47104	-0.00757	-0.57903	0
-4.46938	-0.00664	-0.5624	0
-4.46771	-0.00696	-0.54577	0
-4.46605	-0.00808	-0.52914	0
-4.46439	-0.00731	-0.5125	0
-4.46272	-0.00711	-0.49587	0
-4.46106	-0.00753	-0.47924	0
-4.4594	-0.0072	-0.46261	0
-4.45774	-0.00635	-0.44598	0
-4.45607	-0.0061	-0.42934	0
-4.45441	-0.00638	-0.41271	0
-4.45275	-0.00627	-0.39608	0
-4.45108	-0.0059	-0.37945	0
-4.44942	-0.00577	-0.36281	0
-4.44776	-0.00663	-0.34618	0
-4.44609	-0.00652	-0.32955	0
-4.44443	-0.0058	-0.31292	0
-4.44277	-0.00646	-0.29628	0
-4.4411	-0.0068	-0.27965	0
-4.43944	-0.00631	-0.26302	0
-4.43778	-0.00614	-0.24639	0
-4.43612	-0.00512	-0.22976	0
-4.43445	-0.00522	-0.21312	0
-4.43279	-0.00507	-0.19649	0
-4.43113	-0.00531	-0.17986	0
-4.42946	-0.00545	-0.16323	0
-4.4278	-0.00493	-0.14659	0
-4.42614	-0.00432	-0.12996	0
-4.42447	-0.00519	-0.11333	0
-4.42281	-0.00586	-0.0967	0
-4.42115	-0.00559	-0.08007	0
-4.41949	-0.0048	-0.06343	0
-4.41782	-0.00417	-0.0468	0
-4.41616	-0.00373	-0.03017	0
-4.4145	-0.00374	-0.01354	0
-4.41283	-0.00353	0.003097	0
-4.41117	-0.00293	0.019729	0
-4.40951	-0.00336	0.036361	0
-4.40784	-0.00298	0.052994	0
-4.40618	-0.00351	0.069626	0
-4.40452	-0.00256	0.086258	0
-4.40286	-0.00128	0.10289	0
-4.40119	-0.00058	0.119523	0
-4.39953	-0.00124	0.136155	0
-4.39787	-0.00204	0.152787	0
-4.3962	-0.00308	0.169419	0
-4.39454	-0.00311	0.186052	0
-4.39288	-0.00359	0.202684	0
-4.39121	-0.00278	0.219316	0
-4.38955	-0.00325	0.235949	0
-4.38789	-0.00287	0.252581	0
-4.38623	-0.00243	0.269213	0
-4.38456	-0.00232	0.285845	0
-4.3829	-0.0015	0.302478	0
-4.38124	-0.00235	0.31911	0
-4.37957	-0.00272	0.335742	0
-4.37791	-0.00264	0.352375	0
-4.37625	-0.00249	0.369007	0
-4.37458	-0.00262	0.385639	0
-4.37292	-0.00224	0.402271	0
-4.37126	-0.00252	0.418904	0
-4.3696	-0.00231	0.435536	0
-4.36793	-0.0022	0.452168	0
-4.36627	-0.00263	0.468801	0
-4.36461	-0.00204	0.485433	0
-4.36294	-0.00157	0.502065	0
-4.36128	-0.00176	0.518697	0
-4.35962	-0.00209	0.53533	0
-4.35795	-0.00126	0.551962	0
-4.35629	-0.00149	0.568594	0
-4.35463	-0.00214	0.585227	0
-4.35296	-0.00265	0.601859	0
-4.3513	-0.00217	0.618491	0
-4.34964	-0.00288	0.635123	0
-4.34798	-0.0031	0.651756	0
-4.34631	-0.00407	0.668388	0
-4.34465	-0.00403	0.68502	0
-4.34299	-0.00425	0.701653	0
-4.34132	-0.00392	0.718285	0
-4.33966	-0.00325	0.734917	0
-4.338	-0.00306	0.751549	0
-4.33633	-0.00254	0.768182	0
-4.33467	-0.00386	0.784814	0
-4.33301	-0.00418	0.801446	0
-4.33135	-0.00435	0.818079	0
-4.32968	-0.00409	0.834711	0
-4.32802	-0.00469	0.851343	0
-4.32636	-0.00556	0.867975	0
-4.32469	-0.00513	0.884607	0
-4.32303	-0.00353	0.90124	0
-4.32137	-0.00344	0.917872	0
-4.3197	-0.00441	0.934505	0
-4.31804	-0.00479	0.951137	0
-4.31638	-0.00459	0.967769	0
-4.31471	-0.00375	0.984401	0
-4.31305	-0.00261	1.00103	0
-4.31139	-0.00239	1.01767	0
-4.30973	-0.002	1.0343	0
-4.30806	-0.00293	1.05093	0
-4.3064	-0.00265	1.06756	0
-4.30474	-0.00319	1.0842	0
-4.30307	-0.00376	1.10083	0
-4.30141	-0.00391	1.11746	0
-4.29975	-0.00477	1.13409	0
-4.29808	-0.00425	1.15072	0
-4.29642	-0.00446	1.16736	0
-4.29476	-0.00421	1.18399	0
-4.2931	-0.00507	1.20062	0
-4.29143	-0.00513	1.21725	0
-4.28977	-0.00531	1.23388	0
-4.28811	-0.00468	1.25052	0
-4.28644	-0.0046	1.26715	0
-4.28478	-0.00468	1.28378	0
-4.28312	-0.0046	1.30042	0
-4.28145	-0.00404	1.31705	0
-4.27979	-0.00338	1.33368	0
-4.27813	-0.00346	1.35031	0
-4.27647	-0.00299	1.36694	0
-4.2748	-0.00348	1.38358	0
-4.27314	-0.00415	1.40021	0
-4.27148	-0.00453	1.41684	0
-4.26981	-0.00523	1.43347	0
-4.26815	-0.00559	1.4501	0
-4.26649	-0.00507	1.46674	0
-4.26482	-0.00528	1.48337	0
-4.26316	-0.00525	1.5	0
-4.2615	-0.00478	1.51663	0
-4.25984	-0.00497	1.53327	0
-4.25817	-0.0039	1.5499	0
-4.25651	-0.00376	1.56653	0
-4.25485	-0.00416	1.58316	0
-4.25318	-0.00448	1.5998	0
-4.25152	-0.00323	1.61643	0
-4.24986	-0.00318	1.63306	0
-4.24819	-0.0027	1.64969	0
-4.24653	-0.00232	1.66633	0
-4.24487	-0.00232	1.68296	0
-4.2432	-0.00175	1.69959	0
-4.24154	-0.00157	1.71622	0
-4.23988	-0.00223	1.73285	0
-4.23822	-0.00305	1.74949	0
-4.23655	-0.0033	1.76612	0
-4.23489	-0.00296	1.78275	0
-4.23323	-0.00357	1.79938	0
-4.23156	-0.00344	1.81601	0
-4.2299	-0.0036	1.83265	0
-4.22824	-0.00343	1.84928	0
-4.22657	-0.00307	1.86591	0
-4.22491	-0.00245	1.88254	0
-4.22325	-0.00238	1.89918	0
-4.22159	-0.00135	1.91581	0
-4.21992	-0.00076	1.93244	0
-4.21826	-0.00018	1.94907	0
-4.2166	0.000406	1.96571	0
-4.21493	-0.00057	1.98234	0
-4.21327	-0.00035	1.99897	0
-4.21161	-0.00015	2.0156	0
-4.20994	-0.00021	2.03224	0
-4.20828	-0.00102	2.04887	0
-4.20662	-0.00091	2.0655	0
-4.20496	-0.00104	2.08213	0
-4.20329	-0.00125	2.09876	0
-4.20163	-0.00129	2.1154	0
-4.19997	-0.00071	2.13203	0
-4.1983	-0.00021	2.14866	0
-4.19664	-0.00023	2.16529	0
-4.19498	-0.00024	2.18193	0
-4.19331	-0.00025	2.19856	0
-4.19165	-0.00032	2.21519	0
-4.18999	0.00041	2.23182	0
-4.18832	0.001336	2.24845	0
-4.18666	0.001621	2.26509	0
-4.185	0.001683	2.28172	0
-4.18334	0.000859	2.29835	0
-4.18167	0.001108	2.31498	0
-4.18001	0.002671	2.33162	0
-4.17835	0.003414	2.34825	0
-4.17668	0.003455	2.36488	0
-4.17502	0.002568	2.38151	0
-4.17336	0.00279	2.39814	0
-4.17169	0.00377	2.41478	0
-4.17003	0.003146	2.43141	0
-4.16837	0.002697	2.44804	0
-4.16671	0.003608	2.46467	0
-4.16504	0.003096	2.48131	0
-4.16338	0.002603	2.49794	0
-4.16172	0.002846	2.51457	0
-4.16005	0.003652	2.5312	0
-4.15839	0.003284	2.54784	0
-4.15673	0.003138	2.56447	0
-4.15506	0.003564	2.5811	0
-4.1534	0.003801	2.59773	0
-4.15174	0.00319	2.61436	0
-4.15008	0.00325	2.631	0
-4.14841	0.002984	2.64763	0
-4.14675	0.003358	2.66426	0
-4.14509	0.003107	2.68089	0
-4.14342	0.002793	2.69753	0
-4.14176	0.002276	2.71416	0
-4.1401	0.002073	2.73079	0
-4.13843	0.001497	2.74742	0
-4.13677	0.000624	2.76405	0
-4.13511	8.8e-05	2.78069	0
-4.13345	-0.00028	2.79732	0
-4.13178	-0.00019	2.81395	0
-4.13012	-0.00044	2.83058	0
-4.12846	-0.0008	2.84722	0
-4.12679	5e-06	2.86385	0
-4.12513	0.000794	2.88048	0
-4.12347	0.000813	2.89711	0
-4.1218	0.000383	2.91375	0
-4.12014	0.000431	2.93038	0
-4.11848	0.000619	2.94701	0
-4.11682	0.000337	2.96364	0
-4.11515	0.000363	2.98027	0
-4.11349	0.000597	2.99691	0
-4.11183	6e-05	3.01354	0
-4.11016	0.000358	3.03017	0
-4.1085	0.000334	3.0468	0
-4.10684	-1e-06	3.06344	0
-4.10517	-0.00029	3.08007	0
-4.10351	-0.00067	3.0967	0
-4.10185	-0.00107	3.11333	0
-4.10018	-0.00062	3.12996	0
-4.09852	9.7e-05	3.1466	0
-4.09686	-0.00067	3.16323	0
-4.0952	-0.00188	3.17986	0
-4.09353	-0.00237	3.1965	0
-4.09187	-0.00215	3.21313	0
-4.09021	-0.00197	3.22976	0
-4.08854	-0.00247	3.24639	0
-4.08688	-0.00255	3.26302	0
-4.08522	-0.00263	3.27966	0
-4.08355	-0.00366	3.29629	0
-4.08189	-0.00425	3.31292	0
-4.08023	-0.00426	3.32955	0
-4.07857	-0.00414	3.34619	0
-4.0769	-0.00474	3.36282	0
-4.07524	-0.00517	3.37945	0
-4.07358	-0.00546	3.39608	0
-4.07191	-0.00573	3.41271	0
-4.07025	-0.00582	3.42935	0
-4.06859	-0.00576	3.44598	0
-4.06692	-0.00617	3.46261	0
-4.06526	-0.00596	3.47924	0
-4.0636	-0.00606	3.49588	0
-4.06193	-0.00611	3.51251	0
-4.06027	-0.00598	3.52914	0
-4.05861	-0.00565	3.54577	0
-4.05695	-0.0055	3.5624	0
-4.05528	-0.00569	3.57904	0
-4.05362	-0.00575	3.59567	0
-4.05196	-0.00511	3.6123	0
-4.05029	-0.00481	3.62893	0
-4.04863	-0.00466	3.64557	0
-4.04697	-0.00419	3.6622	0
-4.0453	-0.00377	3.67883	0
-4.04364	-0.0036	3.69546	0
-4.04198	-0.00308	3.7121	0
-4.04032	-0.00274	3.72873	0
-4.03865	-0.00234	3.74536	0
-4.03699	-0.00235	3.76199	0
-4.03533	-0.00252	3.77862	0
-4.03366	-0.00307	3.79526	0
-4.032	-0.00374	3.81189	0
-4.03034	-0.00421	3.82852	0
-4.02867	-0.00349	3.84515	0
-4.02701	-0.00325	3.86178	0
-4.02535	-0.00307	3.87842	0
-4.02369	-0.00251	3.89505	0
-4.02202	-0.00248	3.91168	0
-4.02036	-0.00219	3.92832	0
-4.0187	-0.00181	3.94495	0
-4.01703	-0.00193	3.96158	0
-4.01537	-0.00283	3.97821	0
-4.01371	-0.00271	3.99484	0
-4.01204	-0.00171	4.01148	0
-4.01038	-0.00119	4.02811	0
-4.00872	-0.001	4.04474	0
-4.00706	-0.00101	4.06137	0
-4.00539	-0.00108	4.07801	0
-4.00373	-0.00093	4.09464	0
-4.00207	-0.00025	4.11127	0
-4.0004	0.000589	4.1279	0
-3.99874	0.000645	4.14454	0
-3.99708	0.000197	4.16117	0
-3.99541	-0.00015	4.1778	0
-3.99375	-0.00014	4.19443	0
-3.99209	0.00026	4.21106	0
-3.99042	0.000498	4.2277	0
-3.98876	0.000808	4.24433	0
-3.9871	0.000845	4.26096	0
-3.98544	0.001115	4.27759	0
-3.98377	0.002052	4.29422	0
-3.98211	0.002245	4.31086	0
-3.98045	0.001754	4.32749	0
-3.97878	0.001314	4.34412	0
-3.97712	0.000947	4.36075	0
-3.97546	0.000774	4.37739	0
-3.97379	1.9e-05	4.39402	0
-3.97213	-0.00045	4.41065	0
-3.97047	-5.2e-05	4.42728	0
-3.96881	-9.8e-05	4.44391	0
-3.96714	-0.00018	4.46055	0
-3.96548	0.000414	4.47718	0
-3.96382	0.001296	4.49381	0
-3.96215	0.001838	4.51044	0
-3.96049	0.001563	4.52708	0
-3.95883	0.000997	4.54371	0
-3.95716	0.001118	4.56034	0
-3.9555	0.001525	4.57697	0
-3.95384	0.001616	4.59361	0
-3.95218	0.002156	4.61024	0
-3.95051	0.002896	4.62687	0
-3.94885	0.00293	4.6435	0
-3.94719	0.002714	4.66014	0
-3.94552	0.00261	4.67677	0
-3.94386	0.002233	4.6934	0
-3.9422	0.001429	4.71003	0
-3.94053	0.000489	4.72666	0
-3.93887	7.1e-05	4.7433	0
-3.93721	-0.00017	4.75993	0
-3.93554	-0.00046	4.77656	0
-3.93388	-0.00028	4.79319	0
-3.93222	5.2e-05	4.80983	0
-3.93056	3.6e-05	4.82646	0
-3.92889	-0.00042	4.84309	0
-3.92723	-0.00102	4.85972	0
-3.92557	-0.00182	4.87636	0
-3.9239	-0.00286	4.89299	0
-3.92224	-0.00396	4.90962	0
-3.92058	-0.00403	4.92625	0
-3.91891	-0.00398	4.94288	0
-3.91725	-0.00493	4.95952	0
-3.91559	-0.005	4.97615	0
-3.91393	-0.00416	4.99278	0
-3.91226	-0.00372	5.00941	0
-3.9106	-0.00334	5.02604	0
-3.90894	-0.00373	5.04268	0
-3.90727	-0.00454	5.05931	0
-3.90561	-0.00476	5.07594	0
-3.90395	-0.00458	5.09258	0
-3.90228	-0.0048	5.10921	0
-3.90062	-0.00543	5.12584	0
-3.89896	-0.0053	5.14247	0
-3.8973	-0.00477	5.1591	0
-3.89563	-0.00414	5.17574	0
-3.89397	-0.00385	5.19237	0
-3.89231	-0.00358	5.209	0
-3.89064	-0.00274	5.22563	0
-3.88898	-0.00116	5.24226	0
-3.88732	-0.00045	5.2589	0
-3.88565	-0.00069	5.27553	0
-3.88399	-0.0009	5.29216	0
-3.88233	-0.00107	5.30879	0
-3.88067	-0.00208	5.32543	0
-3.879	-0.0028	5.34206	0
-3.87734	-0.00309	5.35869	0
-3.87568	-0.00313	5.37532	0
-3.87401	-0.00401	5.39196	0
-3.87235	-0.005	5.40859	0
-3.87069	-0.00535	5.42522	0
-3.86902	-0.00574	5.44185	0
-3.86736	-0.00624	5.45848	0
-3.8657	-0.00614	5.47512	0
-3.86403	-0.00624	5.49175	0
-3.86237	-0.00691	5.50838	0
-3.86071	-0.00728	5.52501	0
-3.85905	-0.0064	5.54165	0
-3.85738	-0.00558	5.55828	0
-3.85572	-0.00491	5.57491	0
-3.85406	-0.00506	5.59154	0
-3.85239	-0.00488	5.60818	0
-3.85073	-0.00483	5.62481	0
-3.84907	-0.00502	5.64144	0
-3.8474	-0.00507	5.65807	0
-3.84574	-0.00525	5.6747	0
-3.84408	-0.00531	5.69134	0
-3.84242	-0.00602	5.70797	0
-3.84075	-0.00632	5.7246	0
-3.83909	-0.00593	5.74123	0
-3.83743	-0.00584	5.75786	0
-3.83576	-0.00658	5.7745	0
-3.8341	-0.00632	5.79113	0
-3.83244	-0.00523	5.80776	0
-3.83077	-0.00444	5.82439	0
-3.82911	-0.00498	5.84103	0
-3.82745	-0.00489	5.85766	0
-3.82579	-0.00413	5.87429	0
-3.82412	-0.0032	5.89092	0
-3.82246	-0.00279	5.90756	0
-3.8208	-0.00224	5.92419	0
-3.81913	-0.00196	5.94082	0
-3.81747	-0.00172	5.95745	0
-3.81581	-0.00241	5.97408	0
-3.81414	-0.00322	5.99072	0
-3.81248	-0.00379	6.00735	0
-3.81082	-0.00354	6.02398	0
-3.80916	-0.00364	6.04061	0
-3.80749	-0.00413	6.05725	0
-3.80583	-0.00504	6.07388	0
-3.80417	-0.00568	6.09051	0
-3.8025	-0.00528	6.10714	0
-3.80084	-0.00517	6.12378	0
-3.79918	-0.00562	6.14041	0
-3.79751	-0.00583	6.15704	0
-3.79585	-0.00603	6.17367	0
-3.79419	-0.00611	6.1903	0
-3.79252	-0.00615	6.20694	0
-3.79086	-0.00505	6.22357	0
-3.7892	-0.00481	6.2402	0
-3.78754	-0.00489	6.25683	0
-3.78587	-0.00554	6.27347	0
-3.78421	-0.00554	6.2901	0
-3.78255	-0.00511	6.30673	0
-3.78088	-0.00457	6.32336	0
-3.77922	-0.00457	6.34	0
-3.77756	-0.00386	6.35663	0
-3.77589	-0.0041	6.37326	0
-3.77423	-0.00416	6.38989	0
-3.77257	-0.00488	6.40652	0
-3.77091	-0.00447	6.42316	0
-3.76924	-0.00399	6.43979	0
-3.76758	-0.00472	6.45642	0
-3.76592	-0.00467	6.47305	0
-3.76425	-0.00403	6.48969	0
-3.76259	-0.00361	6.50632	0
-3.76093	-0.00363	6.52295	0
-3.75926	-0.00228	6.53958	0
-3.7576	-0.00118	6.55621	0
-3.75594	-0.00038	6.57285	0
-3.75428	-0.00019	6.58948	0
-3.75261	0.000235	6.60611	0
-3.75095	7.6e-05	6.62274	0
-3.74929	-0.00017	6.63938	0
-3.74762	-0.00099	6.65601	0
-3.74596	-0.00036	6.67264	0
-3.7443	-0.00021	6.68927	0
-3.74263	-0.00019	6.7059	0
-3.74097	-0.00021	6.72254	0
-3.73931	8.7e-05	6.73917	0
-3.73764	-0.00023	6.7558	0
-3.73598	6.6e-05	6.77243	0
-3.73432	0.000685	6.78907	0
-3.73266	0.001164	6.8057	0
-3.73099	0.00153	6.82233	0
-3.72933	0.002157	6.83896	0
-3.72767	0.002064	6.8556	0
-3.726	0.001742	6.87223	0
-3.72434	0.002074	6.88886	0
-3.72268	0.002554	6.90549	0
-3.72101	0.002995	6.92213	0
-3.71935	0.001917	6.93876	0
-3.71769	0.001685	6.95539	0
-3.71603	0.002158	6.97202	0
-3.71436	0.002861	6.98865	0
-3.7127	0.002848	7.00529	0
-3.71104	0.003087	7.02192	0
-3.70937	0.003519	7.03855	0
-3.70771	0.002793	7.05518	0
-3.70605	0.003712	7.07181	0
-3.70438	0.004055	7.08845	0
-3.70272	0.004615	7.10508	0
-3.70106	0.004437	7.12171	0
-3.6994	0.004623	7.13834	0
-3.69773	0.00413	7.15498	0
-3.69607	0.004045	7.17161	0
-3.69441	0.003038	7.18824	0
-3.69274	0.00295	7.20487	0
-3.69108	0.002773	7.22151	0
-3.68942	0.002844	7.23814	0
-3.68775	0.002492	7.25477	0
-3.68609	0.001919	7.2714	0
-3.68443	0.002038	7.28803	0
-3.68277	0.002876	7.30467	0
-3.6811	0.002556	7.3213	0
-3.67944	0.002189	7.33793	0
-3.67778	0.00252	7.35456	0
-3.67611	0.002524	7.3712	0
-3.67445	0.002508	7.38783	0
-3.67279	0.002611	7.40446	0
-3.67112	0.00322	7.42109	0
-3.66946	0.00286	7.43773	0
-3.6678	0.003421	7.45436	0
-3.66613	0.00359	7.47099	0
-3.66447	0.004012	7.48762	0
-3.66281	0.003953	7.50425	0
-3.66115	0.003737	7.52089	0
-3.65948	0.00367	7.53752	0
-3.65782	0.003895	7.55415	0
-3.65616	0.003727	7.57078	0
-3.65449	0.00361	7.58742	0
-3.65283	0.003671	7.60405	0
-3.65117	0.003686	7.62068	0
-3.6495	0.004107	7.63731	0
-3.64784	0.003903	7.65395	0
-3.64618	0.003892	7.67058	0
-3.64452	0.003363	7.68721	0
-3.64285	0.004077	7.70384	0
-3.64119	0.003775	7.72048	0
-3.63953	0.004081	7.73711	0
-3.63786	0.004996	7.75374	0
-3.6362	0.005577	7.77037	0
-3.63454	0.007244	7.787	0
-3.63287	0.006719	7.80364	0
-3.63121	0.006841	7.82027	0
-3.62955	0.007787	7.8369	0
-3.62789	0.008363	7.85353	0
-3.62622	0.0087	7.87016	0
-3.62456	0.00851	7.8868	0
-3.6229	0.007035	7.90343	0
-3.62123	0.007356	7.92006	0
-3.61957	0.007766	7.93669	0
-3.61791	0.007945	7.95333	0
-3.61624	0.007245	7.96996	0
-3.61458	0.007157	7.98659	0
-3.61292	0.007615	8.00322	0
-3.61125	0.00844	8.01985	0
-3.60959	0.008334	8.03649	0
-3.60793	0.008283	8.05312	0
-3.60627	0.009109	8.06975	0
-3.6046	0.009995	8.08638	0
-3.60294	0.01081	8.10302	0
-3.60128	0.011758	8.11965	0
-3.59961	0.011775	8.13628	0
-3.59795	0.011799	8.15291	0
-3.59629	0.011567	8.16955	0
-3.59462	0.0113	8.18618	0
-3.59296	0.011982	8.20281	0
-3.5913	0.012957	8.21944	0
-3.58964	0.013157	8.23607	0
-3.58797	0.013195	8.25271	0
-3.58631	0.013889	8.26934	0
-3.58465	0.01451	8.28597	0
-3.58298	0.015214	8.3026	0
-3.58132	0.014527	8.31924	0
-3.57966	0.014872	8.33587	0
-3.57799	0.014945	8.3525	0
-3.57633	0.014055	8.36913	0
-3.57467	0.013112	8.38576	0
-3.57301	0.013124	8.4024	0
-3.57134	0.013683	8.41903	0
-3.56968	0.014048	8.43566	0
-3.56802	0.014393	8.45229	0
-3.56635	0.014644	8.46893	0
-3.56469	0.014989	8.48556	0
-3.56303	0.014812	8.50219	0
-3.56136	0.015838	8.51882	0
-3.5597	0.015571	8.53546	0
-3.55804	0.015468	8.55209	0
-3.55638	0.015609	8.56872	0
-3.55471	0.013799	8.58535	0
-3.55305	0.014026	8.60199	0
-3.55139	0.012675	8.61862	0
-3.54972	0.013149	8.63525	0
-3.54806	0.012986	8.65188	0
-3.5464	0.012139	8.66851	0
-3.54473	0.011795	8.68515	0
-3.54307	0.011356	8.70178	0
-3.54141	0.011703	8.71841	0
-3.53974	0.012632	8.73504	0
-3.53808	0.011864	8.75168	0
-3.53642	0.011758	8.76831	0
-3.53476	0.01206	8.78494	0
-3.53309	0.013122	8.80157	0
-3.53143	0.013313	8.81821	0
-3.52977	0.01364	8.83484	0
-3.5281	0.013362	8.85147	0
-3.52644	0.01364	8.8681	0
-3.52478	0.01465	8.88473	0
-3.52311	0.014361	8.90137	0
-3.52145	0.013179	8.918	0
-3.51979	0.013099	8.93463	0
-3.51813	0.012664	8.95126	0
-3.51646	0.012387	8.9679	0
-3.5148	0.012933	8.98453	0
-3.51314	0.013654	9.00116	0
-3.51147	0.014497	9.01779	0
-3.50981	0.014649	9.03442	0
-3.50815	0.013223	9.05106	0
-3.50648	0.012664	9.06769	0
-3.50482	0.012587	9.08432	0
-3.50316	0.01243	9.10095	0
-3.5015	0.012287	9.11759	0
-3.49983	0.012047	9.13422	0
-3.49817	0.012348	9.15085	0
-3.49651	0.011583	9.16748	0
-3.49484	0.0118	9.18411	0
-3.49318	0.011599	9.20075	0
-3.49152	0.011746	9.21738	0
-3.48985	0.011792	9.23401	0
-3.48819	0.010895	9.25065	0
-3.48653	0.010597	9.26728	0
-3.48486	0.011026	9.28391	0
-3.4832	0.010641	9.30054	0
-3.48154	0.010756	9.31717	0
-3.47988	0.010605	9.3338	0
-3.47821	0.010511	9.35044	0
-3.47655	0.01017	9.36707	0
-3.47489	0.011151	9.3837	0
-3.47322	0.010886	9.40034	0
-3.47156	0.01064	9.41697	0
-3.4699	0.010631	9.4336	0
-3.46823	0.01034	9.45023	0
-3.46657	0.010389	9.46686	0
-3.46491	0.009992	9.4835	0
-3.46325	0.010756	9.50013	0
-3.46158	0.010299	9.51676	0
-3.45992	0.010253	9.53339	0
-3.45826	0.010299	9.55003	0
-3.45659	0.01105	9.56666	0
-3.45493	0.012042	9.58329	0
-3.45327	0.012409	9.59992	0
-3.4516	0.012102	9.61655	0
-3.44994	0.01159	9.63319	0
-3.44828	0.011369	9.64982	0
-3.44662	0.01136	9.66645	0
-3.44495	0.011928	9.68308	0
-3.44329	0.012154	9.69971	0
-3.44163	0.011482	9.71635	0
-3.43996	0.011345	9.73298	0
-3.4383	0.011894	9.74961	0
-3.43664	0.012175	9.76624	0
-3.43497	0.012659	9.78288	0
-3.43331	0.012985	9.79951	0
-3.43165	0.012395	9.81614	0
-3.42999	0.012431	9.83277	0
-3.42832	0.011734	9.84941	0
-3.42666	0.010343	9.86604	0
-3.425	0.010956	9.88267	0
-3.42333	0.012089	9.8993	0
-3.42167	0.01217	9.91594	0
-3.42001	0.011309	9.93257	0
-3.41834	0.011266	9.9492	0
-3.41668	0.010771	9.96583	0
-3.41502	0.010737	9.98246	0
-3.41335	0.011508	9.9991	0
-3.41169	0.010923	10.0157	0
-3.41003	0.012199	10.0324	0
-3.40837	0.01296	10.049	0
-3.4067	0.012616	10.0656	0
-3.40504	0.012603	10.0823	0
-3.40338	0.013916	10.0989	0
-3.40171	0.012906	10.1155	0
-3.40005	0.012066	10.1321	0
-3.39839	0.012413	10.1488	0
-3.39672	0.012322	10.1654	0
-3.39506	0.013321	10.1821	0
-3.3934	0.013255	10.1987	0
-3.39174	0.013236	10.2153	0
-3.39007	0.013496	10.2319	0
-3.38841	0.013753	10.2486	0
-3.38675	0.014023	10.2652	0
-3.38508	0.014359	10.2819	0
-3.38342	0.013921	10.2985	0
-3.38176	0.013727	10.3151	0
-3.38009	0.01348	10.3317	0
-3.37843	0.01401	10.3484	0
-3.37677	0.014167	10.365	0
-3.37511	0.014237	10.3816	0
-3.37344	0.01379	10.3983	0
-3.37178	0.013139	10.4149	0
-3.37012	0.012309	10.4315	0
-3.36845	0.011789	10.4482	0
-3.36679	0.011417	10.4648	0
-3.36513	0.012006	10.4814	0
-3.36346	0.011402	10.4981	0
-3.3618	0.011237	10.5147	0
-3.36014	0.011112	10.5313	0
-3.35847	0.010865	10.548	0
-3.35681	0.010532	10.5646	0
-3.35515	0.010389	10.5812	0
-3.35349	0.009856	10.5979	0
-3.35182	0.008543	10.6145	0
-3.35016	0.008111	10.6311	0
-3.3485	0.007972	10.6478	0
-3.34683	0.007868	10.6644	0
-3.34517	0.007667	10.681	0
-3.34351	0.009102	10.6976	0
-3.34184	0.009489	10.7143	0
-3.34018	0.008346	10.7309	0
-3.33852	0.007726	10.7476	0
-3.33686	0.007767	10.7642	0
-3.33519	0.007653	10.7808	0
-3.33353	0.007605	10.7974	0
-3.33187	0.007353	10.8141	0
-3.3302	0.006889	10.8307	0
-3.32854	0.007066	10.8473	0
-3.32688	0.006231	10.864	0
-3.32521	0.004595	10.8806	0
-3.32355	0.0046	10.8972	0
-3.32189	0.005048	10.9139	0
-3.32023	0.00409	10.9305	0
-3.31856	0.003995	10.9471	0
-3.3169	0.004668	10.9638	0
-3.31524	0.004359	10.9804	0
-3.31357	0.00397	10.997	0
-3.31191	0.003098	11.0137	0
-3.31025	0.003349	11.0303	0
-3.30858	0.003023	11.0469	0
-3.30692	0.003361	11.0636	0
-3.30526	0.003106	11.0802	0
-3.3036	0.003878	11.0968	0
-3.30193	0.004322	11.1135	0
-3.30027	0.005243	11.1301	0
-3.29861	0.006174	11.1467	0
-3.29694	0.00596	11.1634	0
-3.29528	0.005462	11.18	0
-3.29362	0.005189	11.1966	0
-3.29195	0.004676	11.2133	0
-3.29029	0.004169	11.2299	0
-3.28863	0.004515	11.2465	0
-3.28696	0.005227	11.2631	0
-3.2853	0.006231	11.2798	0
-3.28364	0.006909	11.2964	0
-3.28198	0.006155	11.3131	0
-3.28031	0.00594	11.3297	0
-3.27865	0.005574	11.3463	0
-3.27699	0.005478	11.3629	0
-3.27532	0.005804	11.3796	0
-3.27366	0.006077	11.3962	0
-3.272	0.006217	11.4128	0
-3.27033	0.005581	11.4295	0
-3.26867	0.006285	11.4461	0
-3.26701	0.006586	11.4627	0
-3.26535	0.006281	11.4794	0
-3.26368	0.006226	11.496	0
-3.26202	0.006107	11.5126	0
-3.26036	0.005644	11.5293	0
-3.25869	0.004645	11.5459	0
-3.25703	0.004984	11.5625	0
-3.25537	0.005724	11.5792	0
-3.2537	0.006258	11.5958	0
-3.25204	0.005725	11.6124	0
-3.25038	0.005665	11.6291	0
-3.24872	0.006262	11.6457	0
-3.24705	0.007336	11.6623	0
-3.24539	0.007725	11.679	0
-3.24373	0.008083	11.6956	0
-3.24206	0.008483	11.7122	0
-3.2404	0.008463	11.7288	0
-3.23874	0.007746	11.7455	0
-3.23707	0.007067	11.7621	0
-3.23541	0.007226	11.7788	0
-3.23375	0.007312	11.7954	0
-3.23209	0.007593	11.812	0
-3.23042	0.007754	11.8286	0
-3.22876	0.007515	11.8453	0
-3.2271	0.007404	11.8619	0
-3.22543	0.007725	11.8785	0
-3.22377	0.007435	11.8952	0
-3.22211	0.00804	11.9118	0
-3.22044	0.008006	11.9284	0
-3.21878	0.007241	11.9451	0
-3.21712	0.006762	11.9617	0
-3.21545	0.006154	11.9783	0
-3.21379	0.005912	11.995	0
-3.21213	0.006149	12.0116	0
-3.21047	0.005961	12.0282	0
-3.2088	0.005653	12.0449	0
-3.20714	0.005919	12.0615	0
-3.20548	0.00552	12.0781	0
-3.20381	0.004915	12.0948	0
-3.20215	0.004517	12.1114	0
-3.20049	0.003747	12.128	0
-3.19882	0.003402	12.1447	0
-3.19716	0.003771	12.1613	0
-3.1955	0.004019	12.1779	0
-3.19384	0.004193	12.1946	0
-3.19217	0.003705	12.2112	0
-3.19051	0.003203	12.2278	0
-3.18885	0.002221	12.2445	0
-3.18718	0.002075	12.2611	0
-3.18552	0.001891	12.2777	0
-3.18386	0.001466	12.2943	0
-3.18219	0.001719	12.311	0
-3.18053	0.001964	12.3276	0
-3.17887	0.002345	12.3443	0
-3.17721	0.002393	12.3609	0
-3.17554	0.002753	12.3775	0
-3.17388	0.003384	12.3941	0
-3.17222	0.003299	12.4108	0
-3.17055	0.003576	12.4274	0
-3.16889	0.004523	12.444	0
-3.16723	0.004269	12.4607	0
-3.16556	0.003454	12.4773	0
-3.1639	0.002783	12.4939	0
-3.16224	0.002799	12.5106	0
-3.16057	0.003053	12.5272	0
-3.15891	0.003781	12.5438	0
-3.15725	0.004891	12.5605	0
-3.15559	0.005573	12.5771	0
-3.15392	0.005735	12.5937	0
-3.15226	0.005413	12.6104	0
-3.1506	0.005026	12.627	0
-3.14893	0.004574	12.6436	0
-3.14727	0.004683	12.6603	0
-3.14561	0.005008	12.6769	0
-3.14394	0.004755	12.6935	0
-3.14228	0.003961	12.7102	0
-3.14062	0.003294	12.7268	0
-3.13896	0.003342	12.7434	0
-3.13729	0.003679	12.7601	0
-3.13563	0.003793	12.7767	0
-3.13397	0.003273	12.7933	0
-3.1323	0.002999	12.81	0
-3.13064	0.003428	12.8266	0
-3.12898	0.003913	12.8432	0
-3.12731	0.00493	12.8598	0
-3.12565	0.005753	12.8765	0.002866
-3.12399	0.005663	12.8931	0.03526
-3.12233	0.005441	12.9098	0.078536
-3.12066	0.005554	12.9264	0.121636
-3.119	0.006098	12.943	0.164922
-3.11734	0.006649	12.9596	0.208203
-3.11567	0.007451	12.9763	0.251317
-3.11401	0.008105	12.9929	0.294615
-3.11235	0.007961	13.0095	0.337876
-3.11068	0.00711	13.0262	0.381094
-3.10902	0.006831	13.0428	0.424318
-3.10736	0.007494	13.0594	0.467544
-3.1057	0.008257	13.0761	0.510765
-3.10403	0.008864	13.0927	0.553996
-3.10237	0.009321	13.1093	0.597216
-3.10071	0.010148	13.126	0.640435
-3.09904	0.010535	13.1426	0.683525
-3.09738	0.010929	13.1592	0.726822
-3.09572	0.011084	13.1759	0.7701
-3.09405	0.01141	13.1925	0.813218
-3.09239	0.011503	13.2091	0.856512
-3.09073	0.01126	13.2258	0.899755
-3.08906	0.011366	13.2424	0.94294
-3.0874	0.011563	13.259	0.986195
-3.08574	0.011167	13.2757	1.02945
-3.08408	0.01101	13.2923	1.07268
-3.08241	0.011113	13.3089	1.1159
-3.08075	0.011206	13.3255	1.15912
-3.07909	0.011094	13.3422	1.20234
-3.07742	0.010541	13.3588	1.24544
-3.07576	0.010293	13.3755	1.28872
-3.0741	0.009607	13.3921	1.33201
-3.07243	0.009214	13.4087	1.37513
-3.07077	0.009411	13.4253	1.4184
-3.06911	0.00999	13.442	1.46165
-3.06745	0.010551	13.4586	1.50488
-3.06578	0.011027	13.4752	1.54811
-3.06412	0.011382	13.4919	1.59134
-3.06246	0.011871	13.5085	1.63456
-3.06079	0.012651	13.5251	1.67779
-3.05913	0.013566	13.5418	1.72101
-3.05747	0.013895	13.5584	1.76423
-3.0558	0.013622	13.575	1.80734
-3.05414	0.012911	13.5917	1.85061
-3.05248	0.012595	13.6083	1.89392
-3.05082	0.01308	13.6249	1.93704
-3.04915	0.013296	13.6416	1.98031
-3.04749	0.013189	13.6582	2.02355
-3.04583	0.013184	13.6748	2.06678
-3.04416	0.012693	13.6915	2.11002
-3.0425	0.012355	13.7081	2.15326
-3.04084	0.012624	13.7247	2.19648
-3.03917	0.013402	13.7414	2.23965
-3.03751	0.013803	13.758	2.28288
-3.03585	0.013878	13.7746	2.32614
-3.03418	0.013677	13.7913	2.36926
-3.03252	0.013993	13.8079	2.41252
-3.03086	0.014395	13.8245	2.45581
-3.0292	0.014905	13.8412	2.49897
-3.02753	0.015854	13.8578	2.54222
-3.02587	0.0168	13.8744	2.58548
-3.02421	0.016776	13.891	2.6287
-3.02254	0.016743	13.9077	2.67191
-3.02088	0.017154	13.9243	2.71513
-3.01922	0.017176	13.941	2.75833
-3.01755	0.016669	13.9576	2.80146
-3.01589	0.01678	13.9742	2.84475
-3.01423	0.017021	13.9909	2.88803
-3.01257	0.016623	14.0075	2.93114
-3.0109	0.016327	14.0241	2.97441
-3.00924	0.016463	14.0407	3.01771
-3.00758	0.016032	14.0574	3.06094
-3.00591	0.015079	14.074	3.10417
-3.00425	0.014646	14.0906	3.14738
-3.00259	0.014163	14.1073	3.1906
-3.00092	0.014257	14.1239	3.23372
-2.99926	0.014757	14.1405	3.27698
-2.9976	0.014751	14.1572	3.32029
-2.99594	0.014344	14.1738	3.3634
-2.99427	0.014336	14.1904	3.40663
-2.99261	0.01502	14.2071	3.44993
-2.99095	0.015525	14.2237	3.49315
-2.98928	0.015585	14.2403	3.53639
-2.98762	0.015888	14.257	3.57961
-2.98596	0.015454	14.2736	3.62284
-2.98429	0.014428	14.2902	3.66597
-2.98263	0.013779	14.3069	3.70921
-2.98097	0.013709	14.3235	3.75251
-2.97931	0.013104	14.3401	3.79563
-2.97764	0.01243	14.3567	3.83887
-2.97598	0.01189	14.3734	3.88218
-2.97432	0.011843	14.39	3.92541
-2.97265	0.012019	14.4067	3.96862
-2.97099	0.011864	14.4233	4.01184
-2.96933	0.011797	14.4399	4.05507
-2.96766	0.012238	14.4566	4.09821
-2.966	0.013326	14.4732	4.14143
-2.96434	0.013699	14.4898	4.18472
-2.96267	0.013072	14.5064	4.22787
-2.96101	0.012836	14.5231	4.27111
-2.95935	0.013562	14.5397	4.31443
-2.95769	0.014419	14.5563	4.35764
-2.95602	0.014702	14.573	4.40085
-2.95436	0.014923	14.5896	4.44407
-2.9527	0.014894	14.6062	4.48731
-2.95103	0.015698	14.6229	4.53044
-2.94937	0.015809	14.6395	4.57367
-2.94771	0.014575	14.6561	4.61698
-2.94604	0.014051	14.6728	4.66014
-2.94438	0.013997	14.6894	4.70335
-2.94272	0.013983	14.706	4.74664
-2.94106	0.013859	14.7227	4.78988
-2.93939	0.014188	14.7393	4.8331
-2.93773	0.014293	14.7559	4.87632
-2.93607	0.014281	14.7726	4.91953
-2.9344	0.014886	14.7892	4.96266
-2.93274	0.014767	14.8058	5.00589
-2.93108	0.013926	14.8225	5.04922
-2.92941	0.013744	14.8391	5.09244
-2.92775	0.013512	14.8557	5.13565
-2.92609	0.013534	14.8724	5.17889
-2.92443	0.014134	14.889	5.2221
-2.92276	0.014309	14.9056	5.26522
-2.9211	0.014443	14.9223	5.30844
-2.91944	0.014755	14.9389	5.35176
-2.91777	0.015386	14.9555	5.39492
-2.91611	0.015864	14.9721	5.43812
-2.91445	0.016138	14.9888	5.48143
-2.91278	0.016501	15.0054	5.52466
-2.91112	0.016684	15.0221	5.56787
-2.90946	0.016575	15.0387	5.6111
-2.90779	0.017033	15.0553	5.65433
-2.90613	0.017855	15.0719	5.69747
-2.90447	0.018257	15.0886	5.74069
-2.90281	0.018356	15.1052	5.784
-2.90114	0.018813	15.1218	5.82722
-2.89948	0.019159	15.1385	5.87043
-2.89782	0.018734	15.1551	5.91363
-2.89615	0.018859	15.1717	5.95686
-2.89449	0.018402	15.1884	6.00003
-2.89283	0.018411	15.205	6.04323
-2.89116	0.018929	15.2216	6.08655
-2.8895	0.018244	15.2383	6.12971
-2.88784	0.017975	15.2549	6.17291
-2.88618	0.01767	15.2715	6.21623
-2.88451	0.017544	15.2882	6.25945
-2.88285	0.01664	15.3048	6.30265
-2.88119	0.016725	15.3214	6.34588
-2.87952	0.01693	15.3381	6.38913
-2.87786	0.016458	15.3547	6.43227
-2.8762	0.0158	15.3713	6.47546
-2.87453	0.015136	15.388	6.51879
-2.87287	0.014788	15.4046	6.56203
-2.87121	0.014348	15.4212	6.60525
-2.86955	0.013935	15.4378	6.64847
-2.86788	0.012796	15.4545	6.69169
-2.86622	0.012317	15.4711	6.73483
-2.86456	0.012432	15.4878	6.77802
-2.86289	0.012366	15.5044	6.82134
-2.86123	0.012276	15.521	6.86457
-2.85957	0.011963	15.5376	6.90781
-2.8579	0.011503	15.5543	6.95103
-2.85624	0.011896	15.5709	6.99425
-2.85458	0.011352	15.5875	7.0374
-2.85292	0.011315	15.6042	7.08059
-2.85125	0.010704	15.6208	7.12393
-2.84959	0.009324	15.6374	7.16714
-2.84793	0.009951	15.6541	7.21036
-2.84626	0.010175	15.6707	7.25358
-2.8446	0.010835	15.6873	7.2968
-2.84294	0.01077	15.704	7.33996
-2.84127	0.010571	15.7206	7.38314
-2.83961	0.010559	15.7372	7.42648
-2.83795	0.010542	15.7539	7.46968
-2.83628	0.010766	15.7705	7.51289
-2.83462	0.01143	15.7871	7.55614
-2.83296	0.010265	15.8038	7.59936
-2.8313	0.009944	15.8204	7.64252
-2.82963	0.009485	15.837	7.68569
-2.82797	0.009807	15.8537	7.72902
-2.82631	0.009794	15.8703	7.77221
-2.82464	0.009784	15.8869	7.8154
-2.82298	0.009063	15.9036	7.85872
-2.82132	0.009463	15.9202	7.90191
-2.81965	0.009628	15.9368	7.94505
-2.81799	0.010298	15.9535	7.98824
-2.81633	0.009841	15.9701	8.03161
-2.81467	0.01007	15.9867	8.07477
-2.813	0.010915	16.0034	8.11795
-2.81134	0.012059	16.02	8.16128
-2.80968	0.011891	16.0366	8.2045
-2.80801	0.011361	16.0532	8.24765
-2.80635	0.011627	16.0699	8.29082
-2.80469	0.012084	16.0865	8.33416
-2.80302	0.013007	16.1031	8.37733
-2.80136	0.012641	16.1198	8.42051
-2.7997	0.013394	16.1364	8.46386
-2.79804	0.013244	16.153	8.50707
-2.79637	0.012717	16.1697	8.55021
-2.79471	0.013044	16.1863	8.59337
-2.79305	0.013045	16.2029	8.63674
-2.79138	0.013293	16.2196	8.67991
-2.78972	0.012149	16.2362	8.72309
-2.78806	0.012712	16.2528	8.76638
-2.78639	0.012459	16.2695	8.80958
-2.78473	0.013561	16.2861	8.85279
-2.78307	0.013067	16.3027	8.89592
-2.7814	0.013675	16.3194	8.93927
-2.77974	0.014458	16.336	8.9825
-2.77808	0.014582	16.3526	9.02572
-2.77642	0.014531	16.3693	9.06896
-2.77475	0.016208	16.3859	9.11218
-2.77309	0.01667	16.4025	9.15536
-2.77143	0.016967	16.4192	9.19851
-2.76976	0.017717	16.4358	9.24185
-2.7681	0.018155	16.4524	9.28506
-2.76644	0.01989	16.469	9.3283
-2.76477	0.019902	16.4857	9.37151
-2.76311	0.020736	16.5023	9.41473
-2.76145	0.020525	16.519	9.45792
-2.75979	0.02078	16.5356	9.50102
-2.75812	0.02051	16.5522	9.54431
-2.75646	0.021377	16.5689	9.58763
-2.7548	0.021443	16.5855	9.63087
-2.75313	0.021442	16.6021	9.67409
-2.75147	0.020782	16.6187	9.7173
-2.74981	0.022162	16.6354	9.76048
-2.74814	0.02234	16.652	9.80362
-2.74648	0.022129	16.6686	9.84698
-2.74482	0.022503	16.6853	9.89019
-2.74316	0.022618	16.7019	9.93341
-2.74149	0.022496	16.7185	9.97665
-2.73983	0.022655	16.7352	10.0199
-2.73817	0.02171	16.7518	10.0631
-2.7365	0.021662	16.7684	10.1062
-2.73484	0.020883	16.7851	10.1495
-2.73318	0.02134	16.8017	10.1928
-2.73151	0.021433	16.8183	10.236
-2.72985	0.020473	16.835	10.2791
-2.72819	0.020314	16.8516	10.3224
-2.72653	0.020679	16.8682	10.3657
-2.72486	0.02117	16.8849	10.4089
-2.7232	0.021427	16.9015	10.4521
-2.72154	0.020321	16.9181	10.4953
-2.71987	0.020716	16.9348	10.5385
-2.71821	0.021058	16.9514	10.5816
-2.71655	0.020036	16.968	10.625
-2.71488	0.020342	16.9847	10.6682
-2.71322	0.021019	17.0013	10.7114
-2.71156	0.021503	17.0179	10.7546
-2.70989	0.021614	17.0345	10.7979
-2.70823	0.021514	17.0512	10.841
-2.70657	0.021431	17.0678	10.8842
-2.70491	0.021919	17.0845	10.9275
-2.70324	0.022887	17.1011	10.9708
-2.70158	0.022188	17.1177	11.014
-2.69992	0.022661	17.1343	11.0571
-2.69825	0.022659	17.151	11.1005
-2.69659	0.021942	17.1676	11.1437
-2.69493	0.022124	17.1842	11.1869
-2.69326	0.022319	17.2009	11.2301
-2.6916	0.021482	17.2175	11.2734
-2.68994	0.02094	17.2341	11.3165
-2.68828	0.020384	17.2508	11.3597
-2.68661	0.020079	17.2674	11.403
-2.68495	0.019523	17.284	11.4462
-2.68329	0.018426	17.3007	11.4895
-2.68162	0.018231	17.3173	11.5327
-2.67996	0.017288	17.3339	11.5759
-2.6783	0.017409	17.3506	11.6191
-2.67663	0.016817	17.3672	11.6622
-2.67497	0.017143	17.3838	11.7056
-2.67331	0.016592	17.4005	11.7488
-2.67165	0.016366	17.4171	11.792
-2.66998	0.016424	17.4337	11.8351
-2.66832	0.015876	17.4504	11.8785
-2.66666	0.015247	17.467	11.9217
-2.66499	0.015332	17.4836	11.9649
-2.66333	0.015529	17.5003	12.0081
-2.66167	0.015187	17.5169	12.0514
-2.66	0.015197	17.5335	12.0945
-2.65834	0.015359	17.5501	12.1376
-2.65668	0.015287	17.5668	12.181
-2.65502	0.016044	17.5834	12.2242
-2.65335	0.016144	17.6	12.2675
-2.65169	0.016218	17.6167	12.3105
-2.65003	0.015344	17.6333	12.3539
-2.64836	0.014991	17.65	12.3971
-2.6467	0.015386	17.6666	12.4404
-2.64504	0.015431	17.6832	12.4836
-2.64337	0.016761	17.6998	12.5268
-2.64171	0.016245	17.7165	12.57
-2.64005	0.015617	17.7331	12.6131
-2.63838	0.016152	17.7497	12.6565
-2.63672	0.015579	17.7664	12.6997
-2.63506	0.015656	17.783	12.7429
-2.6334	0.016018	17.7996	12.786
-2.63173	0.015636	17.8163	12.8294
-2.63007	0.016059	17.8329	12.8726
-2.62841	0.015677	17.8495	12.9158
-2.62674	0.015754	17.8662	12.959
-2.62508	0.01536	17.8828	13.0023
-2.62342	0.016259	17.8994	13.0455
-2.62175	0.015685	17.9161	13.0886
-2.62009	0.014731	17.9327	13.1319
-2.61843	0.01465	17.9493	13.1751
-2.61677	0.014238	17.966	13.2182
-2.6151	0.013664	17.9826	13.2614
-2.61344	0.013844	17.9992	13.3048
-2.61178	0.013341	18.0159	13.348
-2.61011	0.013646	18.0325	13.3912
-2.60845	0.014149	18.0491	13.4345
-2.60679	0.014649	18.0658	13.4777
-2.60512	0.014631	18.0824	13.5209
-2.60346	0.014463	18.099	13.5642
-2.6018	0.013959	18.1156	13.6074
-2.60014	0.014382	18.1323	13.6506
-2.59847	0.013785	18.1489	13.6938
-2.59681	0.013782	18.1655	13.7369
-2.59515	0.013581	18.1822	13.7803
-2.59348	0.013653	18.1988	13.8235
-2.59182	0.01313	18.2154	13.8667
-2.59016	0.013356	18.2321	13.9098
-2.58849	0.013537	18.2487	13.9532
-2.58683	0.013171	18.2653	13.9964
-2.58517	0.013411	18.282	14.0396
-2.5835	0.013716	18.2986	14.0829
-2.58184	0.013744	18.3152	14.1261
-2.58018	0.013902	18.3319	14.1693
-2.57852	0.01414	18.3485	14.2124
-2.57685	0.014458	18.3651	14.2557
-2.57519	0.014084	18.3818	14.299
-2.57353	0.014033	18.3984	14.3422
-2.57186	0.013433	18.415	14.3853
-2.5702	0.012851	18.4317	14.4286
-2.56854	0.013079	18.4483	14.4719
-2.56687	0.014665	18.4649	14.5151
-2.56521	0.016162	18.4816	14.5581
-2.56355	0.015997	18.4982	14.6015
-2.56189	0.01585	18.5148	14.6448
-2.56022	0.014391	18.5315	14.688
-2.55856	0.014637	18.5481	14.7312
-2.5569	0.014878	18.5647	14.7744
-2.55523	0.014734	18.5814	14.8176
-2.55357	0.014716	18.598	14.8608
-2.55191	0.014346	18.6146	14.9041
-2.55024	0.014718	18.6313	14.9473
-2.54858	0.014569	18.6479	14.9905
-2.54692	0.014117	18.6645	15.0336
-2.54526	0.014339	18.6811	15.077
-2.54359	0.014288	18.6978	15.1202
-2.54193	0.014872	18.7144	15.1633
-2.54027	0.014965	18.731	15.2065
-2.5386	0.015646	18.7477	15.2499
-2.53694	0.016209	18.7643	15.2931
-2.53528	0.015985	18.7809	15.3363
-2.53361	0.016001	18.7976	15.3794
-2.53195	0.016019	18.8142	15.4227
-2.53029	0.016073	18.8308	15.466
-2.52863	0.016138	18.8475	15.5092
-2.52696	0.015357	18.8641	15.5524
-2.5253	0.014832	18.8807	15.5957
-2.52364	0.014404	18.8974	15.6389
-2.52197	0.014949	18.914	15.6821
-2.52031	0.016261	18.9306	15.7254
-2.51865	0.016337	18.9473	15.7685
-2.51698	0.016831	18.9639	15.8118
-2.51532	0.017419	18.9805	15.8548
-2.51366	0.017428	18.9972	15.8982
-2.51199	0.017591	19.0138	15.9414
-2.51033	0.01795	19.0304	15.9847
-2.50867	0.01866	19.0471	16.0277
-2.50701	0.019076	19.0637	16.0711
-2.50534	0.019268	19.0803	16.1143
-2.50368	0.019176	19.0969	16.1576
-2.50202	0.018968	19.1136	16.2006
-2.50035	0.018481	19.1302	16.244
-2.49869	0.018337	19.1469	16.2872
-2.49703	0.01888	19.1635	16.3304
-2.49536	0.019187	19.1801	16.3737
-2.4937	0.018983	19.1968	16.4169
-2.49204	0.018567	19.2134	16.4601
-2.49038	0.018085	19.23	16.5034
-2.48871	0.018017	19.2466	16.5466
-2.48705	0.018461	19.2633	16.5898
-2.48539	0.018431	19.2799	16.633
-2.48372	0.018496	19.2965	16.6762
-2.48206	0.018201	19.3132	16.7195
-2.4804	0.018598	19.3298	16.7627
-2.47873	0.018767	19.3464	16.8059
-2.47707	0.019032	19.3631	16.8489
-2.47541	0.019135	19.3797	16.8922
-2.47375	0.019683	19.3963	16.9356
-2.47208	0.020693	19.413	16.9788
-2.47042	0.021628	19.4296	17.0219
-2.46876	0.022032	19.4462	17.0652
-2.46709	0.021682	19.4629	17.1085
-2.46543	0.022132	19.4795	17.1517
-2.46377	0.022337	19.4961	17.1947
-2.4621	0.022835	19.5128	17.2381
-2.46044	0.02363	19.5294	17.2814
-2.45878	0.02402	19.546	17.3246
-2.45711	0.02449	19.5627	17.3677
-2.45545	0.023457	19.5793	17.411
-2.45379	0.023223	19.5959	17.4543
-2.45213	0.024045	19.6126	17.4975
-2.45046	0.024883	19.6292	17.5406
-2.4488	0.025101	19.6458	17.5839
-2.44714	0.025128	19.6624	17.6272
-2.44547	0.025237	19.6791	17.6704
-2.44381	0.025663	19.6957	17.7135
-2.44215	0.025798	19.7124	17.7568
-2.44048	0.025506	19.729	17.8
-2.43882	0.025534	19.7456	17.8433
-2.43716	0.024838	19.7623	17.8865
-2.4355	0.025009	19.7789	17.9297
-2.43383	0.024878	19.7955	17.9729
-2.43217	0.024602	19.8121	18.0162
-2.43051	0.024804	19.8288	18.0594
-2.42884	0.025132	19.8454	18.1026
-2.42718	0.025254	19.862	18.1458
-2.42552	0.025247	19.8787	18.189
-2.42385	0.025026	19.8953	18.2323
-2.42219	0.024757	19.9119	18.2755
-2.42053	0.025169	19.9286	18.3187
-2.41887	0.025304	19.9452	18.3619
-2.4172	0.025395	19.9618	18.4052
-2.41554	0.025312	19.9785	18.4484
-2.41388	0.024762	19.9951	18.4916
-2.41221	0.024679	20.0117	18.5347
-2.41055	0.024381	20.0284	18.578
-2.40889	0.024452	20.045	18.6213
-2.40722	0.025311	20.0616	18.6645
-2.40556	0.025277	20.0783	18.7076
-2.4039	0.025051	20.0949	18.7509
-2.40224	0.024932	20.1115	18.7942
-2.40057	0.023961	20.1282	18.8374
-2.39891	0.022953	20.1448	18.8805
-2.39725	0.022343	20.1614	18.9238
-2.39558	0.021959	20.178	18.9671
-2.39392	0.021678	20.1947	19.0103
-2.39226	0.02188	20.2113	19.0534
-2.39059	0.022847	20.2279	19.0967
-2.38893	0.023167	20.2446	19.1399
-2.38727	0.022821	20.2612	19.1832
-2.3856	0.022887	20.2779	19.2262
-2.38394	0.023425	20.2945	19.2696
-2.38228	0.023405	20.3111	19.3129
-2.38062	0.023614	20.3277	19.3561
-2.37895	0.023646	20.3444	19.3991
-2.37729	0.022638	20.361	19.4425
-2.37563	0.022039	20.3776	19.4857
-2.37396	0.021465	20.3943	19.529
-2.3723	0.021563	20.4109	19.572
-2.37064	0.02175	20.4275	19.6154
-2.36897	0.021193	20.4442	19.6586
-2.36731	0.020959	20.4608	19.7019
-2.36565	0.021726	20.4774	19.7449
-2.36399	0.022134	20.4941	19.7883
-2.36232	0.021756	20.5107	19.8315
-2.36066	0.021801	20.5273	19.8748
-2.359	0.021467	20.544	19.9177
-2.35733	0.020915	20.5606	19.9611
-2.35567	0.020659	20.5772	20.0044
-2.35401	0.020664	20.5939	20.0476
-2.35234	0.021075	20.6105	20.0907
-2.35068	0.021602	20.6271	20.1341
-2.34902	0.02193	20.6438	20.1773
-2.34736	0.02153	20.6604	20.2205
-2.34569	0.020978	20.677	20.2636
-2.34403	0.020396	20.6937	20.307
-2.34237	0.020432	20.7103	20.3502
-2.3407	0.020778	20.7269	20.3934
-2.33904	0.020789	20.7435	20.4365
-2.33738	0.020762	20.7602	20.4798
-2.33571	0.020505	20.7768	20.5231
-2.33405	0.020643	20.7934	20.5663
-2.33239	0.02104	20.8101	20.6093
-2.33072	0.020478	20.8267	20.6527
-2.32906	0.019583	20.8433	20.696
-2.3274	0.019449	20.86	20.7392
-2.32574	0.019267	20.8766	20.7823
-2.32407	0.018779	20.8932	20.8256
-2.32241	0.018728	20.9099	20.8689
-2.32075	0.018715	20.9265	20.9121
-2.31908	0.018669	20.9431	20.9553
-2.31742	0.019175	20.9598	20.9985
-2.31576	0.019525	20.9764	21.0418
-2.31409	0.019225	20.993	21.085
-2.31243	0.019059	21.0097	21.1282
-2.31077	0.01895	21.0263	21.1715
-2.30911	0.018299	21.0429	21.2147
-2.30744	0.017452	21.0596	21.2578
-2.30578	0.01702	21.0762	21.3011
-2.30412	0.017164	21.0928	21.3443
-2.30245	0.017385	21.1095	21.3876
-2.30079	0.017038	21.1261	21.4308
-2.29913	0.016682	21.1427	21.474
-2.29746	0.017037	21.1594	21.5172
-2.2958	0.017505	21.176	21.5605
-2.29414	0.017647	21.1926	21.6037
-2.29248	0.017404	21.2093	21.6469
-2.29081	0.017246	21.2259	21.6901
-2.28915	0.016967	21.2425	21.7334
-2.28749	0.016554	21.2592	21.7766
-2.28582	0.016302	21.2758	21.8198
-2.28416	0.016031	21.2924	21.8629
-2.2825	0.015024	21.309	21.9061
-2.28083	0.014311	21.3257	21.9494
-2.27917	0.01495	21.3423	21.9927
-2.27751	0.015445	21.3589	22.0358
-2.27585	0.015653	21.3756	22.0791
-2.27418	0.015559	21.3922	22.1224
-2.27252	0.01518	21.4088	22.1656
-2.27086	0.014873	21.4255	22.2087
-2.26919	0.014001	21.4421	22.252
-2.26753	0.013887	21.4587	22.2953
-2.26587	0.014229	21.4754	22.3385
-2.2642	0.01407	21.492	22.3816
-2.26254	0.014093	21.5086	22.4249
-2.26088	0.01385	21.5253	22.4681
-2.25921	0.013026	21.5419	22.5114
-2.25755	0.012372	21.5585	22.5545
-2.25589	0.012713	21.5752	22.5978
-2.25423	0.013151	21.5918	22.641
-2.25256	0.014008	21.6084	22.6843
-2.2509	0.014181	21.6251	22.7275
-2.24924	0.013646	21.6417	22.7707
-2.24757	0.013569	21.6583	22.8139
-2.24591	0.013795	21.675	22.8571
-2.24425	0.013718	21.6916	22.9004
-2.24258	0.013393	21.7082	22.9436
-2.24092	0.013855	21.7248	22.9868
-2.23926	0.014403	21.7415	23.0301
-2.2376	0.014934	21.7581	23.0733
-2.23593	0.015339	21.7748	23.1164
-2.23427	0.01532	21.7914	23.1596
-2.23261	0.015176	21.808	23.203
-2.23094	0.015995	21.8246	23.2462
-2.22928	0.017111	21.8413	23.2893
-2.22762	0.017184	21.8579	23.3326
-2.22595	0.017082	21.8745	23.3758
-2.22429	0.016862	21.8912	23.419
-2.22263	0.016078	21.9078	23.4621
-2.22097	0.015428	21.9244	23.5054
-2.2193	0.014566	21.9411	23.5487
-2.21764	0.014059	21.9577	23.5919
-2.21598	0.014227	21.9743	23.6352
-2.21431	0.013532	21.991	23.6784
-2.21265	0.012987	22.0076	23.7215
-2.21099	0.0131	22.0242	23.7648
-2.20932	0.013384	22.0409	23.8081
-2.20766	0.013289	22.0575	23.8513
-2.206	0.013419	22.0741	23.8945
-2.20433	0.014174	22.0908	23.9377
-2.20267	0.015019	22.1074	23.981
-2.20101	0.014973	22.124	24.0241
-2.19935	0.01542	22.1407	24.0673
-2.19768	0.015523	22.1573	24.1106
-2.19602	0.014772	22.1739	24.1538
-2.19436	0.013982	22.1906	24.1969
-2.19269	0.014172	22.2072	24.2402
-2.19103	0.015461	22.2238	24.2835
-2.18937	0.016901	22.2405	24.3267
-2.1877	0.017213	22.2571	24.3699
-2.18604	0.017838	22.2737	24.4131
-2.18438	0.018059	22.2904	24.4564
-2.18272	0.017305	22.307	24.4996
-2.18105	0.017672	22.3236	24.5429
-2.17939	0.017812	22.3403	24.5861
-2.17773	0.018554	22.3569	24.6293
-2.17606	0.019721	22.3735	24.6725
-2.1744	0.01915	22.3901	24.7157
-2.17274	0.018501	22.4068	24.7589
-2.17107	0.01786	22.4234	24.8021
-2.16941	0.017398	22.44	24.8454
-2.16775	0.017494	22.4567	24.8886
-2.16609	0.016858	22.4733	24.9318
-2.16442	0.017056	22.4899	24.975
-2.16276	0.017122	22.5066	25.0183
-2.1611	0.017293	22.5232	25.0615
-2.15943	0.018381	22.5398	25.1048
-2.15777	0.018199	22.5565	25.148
-2.15611	0.017924	22.5731	25.1912
-2.15444	0.017536	22.5897	25.2344
-2.15278	0.017419	22.6064	25.2776
-2.15112	0.017405	22.623	25.3209
-2.14946	0.017441	22.6396	25.3641
-2.14779	0.017279	22.6563	25.4073
-2.14613	0.016442	22.6729	25.4505
-2.14447	0.016853	22.6895	25.4937
-2.1428	0.017654	22.7062	25.5369
-2.14114	0.01768	22.7228	25.5802
-2.13948	0.017318	22.7394	25.6234
-2.13781	0.017545	22.7561	25.6666
-2.13615	0.017812	22.7727	25.7098
-2.13449	0.018383	22.7893	25.7531
-2.13282	0.018388	22.8059	25.7963
-2.13116	0.018688	22.8226	25.8395
-2.1295	0.017938	22.8392	25.8828
-2.12784	0.0181	22.8559	25.926
-2.12617	0.018315	22.8725	25.9691
-2.12451	0.018645	22.8891	26.0124
-2.12285	0.018516	22.9058	26.0556
-2.12118	0.017932	22.9224	26.0988
-2.11952	0.016873	22.939	26.1421
-2.11786	0.016694	22.9556	26.1853
-2.11619	0.016309	22.9723	26.2285
-2.11453	0.016197	22.9889	26.2718
-2.11287	0.016747	23.0055	26.315
-2.11121	0.017889	23.0222	26.3582
-2.10954	0.01776	23.0388	26.4015
-2.10788	0.016645	23.0554	26.4447
-2.10622	0.015652	23.0721	26.4878
-2.10455	0.015322	23.0887	26.531
-2.10289	0.015712	23.1053	26.5744
-2.10123	0.014944	23.122	26.6175
-2.09956	0.015477	23.1386	26.6607
-2.0979	0.015865	23.1552	26.704
-2.09624	0.016686	23.1719	26.7472
-2.09458	0.016599	23.1885	26.7904
-2.09291	0.015956	23.2051	26.8337
-2.09125	0.015952	23.2218	26.8769
-2.08959	0.016112	23.2384	26.9201
-2.08792	0.016612	23.255	26.9634
-2.08626	0.016596	23.2717	27.0064
-2.0846	0.016489	23.2883	27.0496
-2.08293	0.017566	23.3049	27.093
-2.08127	0.017362	23.3215	27.1362
-2.07961	0.017777	23.3382	27.1794
-2.07795	0.018212	23.3548	27.2226
-2.07628	0.018087	23.3714	27.2659
-2.07462	0.018385	23.3881	27.3091
-2.07296	0.018265	23.4047	27.3524
-2.07129	0.0183	23.4214	27.3956
-2.06963	0.018856	23.438	27.4388
-2.06797	0.019011	23.4546	27.482
-2.0663	0.019092	23.4712	27.5252
-2.06464	0.019158	23.4879	27.5683
-2.06298	0.019328	23.5045	27.6116
-2.06131	0.018903	23.5211	27.6549
-2.05965	0.01866	23.5378	27.6981
-2.05799	0.018707	23.5544	27.7414
-2.05633	0.019312	23.571	27.7846
-2.05466	0.019695	23.5877	27.8278
-2.053	0.020089	23.6043	27.871
-2.05134	0.019323	23.6209	27.9142
-2.04967	0.019652	23.6376	27.9574
-2.04801	0.019283	23.6542	28.0006
-2.04635	0.02014	23.6708	28.0439
-2.04468	0.019642	23.6875	28.0871
-2.04302	0.020007	23.7041	28.1304
-2.04136	0.019713	23.7207	28.1736
-2.0397	0.02048	23.7374	28.2168
-2.03803	0.021129	23.754	28.2601
-2.03637	0.021811	23.7706	28.3033
-2.03471	0.022155	23.7873	28.3464
-2.03304	0.022599	23.8039	28.3896
-2.03138	0.022966	23.8205	28.4329
-2.02972	0.022553	23.8372	28.4762
-2.02805	0.022465	23.8538	28.5194
-2.02639	0.02215	23.8704	28.5626
-2.02473	0.023257	23.887	28.6058
-2.02307	0.022738	23.9037	28.649
-2.0214	0.022759	23.9203	28.6923
-2.01974	0.021222	23.9369	28.7354
-2.01808	0.021107	23.9536	28.7786
-2.01641	0.021102	23.9702	28.822
-2.01475	0.020852	23.9869	28.8652
-2.01309	0.021316	24.0035	28.9084
-2.01142	0.021674	24.0201	28.9516
-2.00976	0.02115	24.0367	28.9948
-2.0081	0.021981	24.0534	29.0379
-2.00643	0.022227	24.07	29.0813
-2.00477	0.022375	24.0866	29.1244
-2.00311	0.022279	24.1033	29.1676
-2.00145	0.021936	24.1199	29.2109
-1.99978	0.02186	24.1365	29.2542
-1.99812	0.021708	24.1532	29.2974
-1.99646	0.021642	24.1698	29.3406
-1.99479	0.021198	24.1864	29.3839
-1.99313	0.020598	24.2031	29.4271
-1.99147	0.020458	24.2197	29.4702
-1.9898	0.020835	24.2363	29.5133
-1.98814	0.020948	24.253	29.5566
-1.98648	0.020985	24.2696	29.6
-1.98482	0.020957	24.2862	29.6432
-1.98315	0.020995	24.3029	29.6864
-1.98149	0.02078	24.3195	29.7296
-1.97983	0.021061	24.3361	29.7729
-1.97816	0.020746	24.3528	29.8161
-1.9765	0.020943	24.3694	29.8593
-1.97484	0.020761	24.386	29.9025
-1.97317	0.020669	24.4027	29.9456
-1.97151	0.02015	24.4193	29.9889
-1.96985	0.019866	24.4359	30.0322
-1.96819	0.020144	24.4525	30.0754
-1.96652	0.01997	24.4692	30.1186
-1.96486	0.020381	24.4858	30.1618
-1.9632	0.020695	24.5024	30.2051
-1.96153	0.020549	24.5191	30.2483
-1.95987	0.020215	24.5357	30.2915
-1.95821	0.019481	24.5523	30.3348
-1.95654	0.019888	24.569	30.3779
-1.95488	0.019732	24.5856	30.4212
-1.95322	0.019845	24.6022	30.4644
-1.95156	0.02	24.6189	30.5076
-1.94989	0.019816	24.6355	30.5508
-1.94823	0.019461	24.6521	30.5941
-1.94657	0.019761	24.6688	30.6373
-1.9449	0.019215	24.6854	30.6806
-1.94324	0.018896	24.702	30.7238
-1.94158	0.018241	24.7187	30.767
-1.93991	0.018746	24.7353	30.8102
-1.93825	0.019509	24.7519	30.8534
-1.93659	0.020944	24.7686	30.8965
-1.93492	0.020988	24.7852	30.9398
-1.93326	0.020553	24.8018	30.9831
-1.9316	0.020332	24.8185	31.0263
-1.92994	0.020253	24.8351	31.0695
-1.92827	0.019126	24.8517	31.1127
-1.92661	0.019555	24.8684	31.1559
-1.92495	0.019389	24.885	31.1992
-1.92328	0.02007	24.9016	31.2425
-1.92162	0.019956	24.9183	31.2856
-1.91996	0.01963	24.9349	31.3288
-1.91829	0.019467	24.9515	31.3721
-1.91663	0.020388	24.9682	31.4153
-1.91497	0.020958	24.9848	31.4585
-1.91331	0.022432	25.0014	31.5018
-1.91164	0.023011	25.018	31.545
-1.90998	0.023571	25.0347	31.5882
-1.90832	0.023171	25.0513	31.6315
-1.90665	0.023151	25.0679	31.6747
-1.90499	0.023639	25.0846	31.7178
-1.90333	0.024008	25.1012	31.7609
-1.90166	0.023194	25.1178	31.8043
-1.9	0.022948	25.1345	31.8476
-1.89834	0.022466	25.1511	31.8908
-1.89668	0.021252	25.1677	31.934
-1.89501	0.022156	25.1844	31.9771
-1.89335	0.022474	25.201	32.0204
-1.89169	0.022514	25.2176	32.0637
-1.89002	0.022774	25.2343	32.1069
-1.88836	0.022047	25.2509	32.1501
-1.8867	0.021809	25.2675	32.1933
-1.88503	0.022855	25.2842	32.2366
-1.88337	0.023195	25.3008	32.2798
-1.88171	0.023037	25.3174	32.323
-1.88004	0.022	25.3341	32.3661
-1.87838	0.021857	25.3507	32.4095
-1.87672	0.022136	25.3673	32.4527
-1.87506	0.02208	25.384	32.4959
-1.87339	0.021098	25.4006	32.5391
-1.87173	0.021133	25.4172	32.5822
-1.87007	0.020734	25.4338	32.6255
-1.8684	0.021336	25.4505	32.6688
-1.86674	0.020888	25.4671	32.712
-1.86508	0.021314	25.4838	32.7552
-1.86341	0.021395	25.5004	32.7983
-1.86175	0.021039	25.517	32.8417
-1.86009	0.021743	25.5337	32.8849
-1.85843	0.021287	25.5503	32.9282
-1.85676	0.022331	25.5669	32.9714
-1.8551	0.02194	25.5835	33.0146
-1.85344	0.02227	25.6002	33.0577
-1.85177	0.021855	25.6168	33.1011
-1.85011	0.021708	25.6334	33.1443
-1.84845	0.02179	25.6501	33.1875
-1.84678	0.021053	25.6667	33.2307
-1.84512	0.020979	25.6833	33.2739
-1.84346	0.02206	25.7	33.3171
-1.8418	0.022175	25.7166	33.3603
-1.84013	0.021335	25.7332	33.4034
-1.83847	0.021208	25.7499	33.4468
-1.83681	0.022111	25.7665	33.49
-1.83514	0.023574	25.7831	33.5333
-1.83348	0.022879	25.7998	33.5765
-1.83182	0.023298	25.8164	33.6196
-1.83015	0.022831	25.833	33.6629
-1.82849	0.021838	25.8497	33.7062
-1.82683	0.021831	25.8663	33.7494
-1.82517	0.021865	25.8829	33.7926
-1.8235	0.021002	25.8996	33.8357
-1.82184	0.020713	25.9162	33.8789
-1.82018	0.019961	25.9328	33.9223
-1.81851	0.020704	25.9494	33.9655
-1.81685	0.021098	25.9661	34.0087
-1.81519	0.021895	25.9827	34.0519
-1.81352	0.02227	25.9993	34.0952
-1.81186	0.022307	26.016	34.1384
-1.8102	0.021993	26.0326	34.1816
-1.80853	0.021884	26.0493	34.2249
-1.80687	0.021836	26.0659	34.2681
-1.80521	0.02222	26.0825	34.3113
-1.80355	0.022532	26.0991	34.3545
-1.80188	0.02262	26.1158	34.3978
-1.80022	0.02238	26.1324	34.441
-1.79856	0.022181	26.149	34.4842
-1.79689	0.021884	26.1657	34.5274
-1.79523	0.021892	26.1823	34.5706
-1.79357	0.021372	26.1989	34.6138
-1.7919	0.022149	26.2156	34.6571
-1.79024	0.022794	26.2322	34.7002
-1.78858	0.023494	26.2488	34.7435
-1.78692	0.023779	26.2655	34.7867
-1.78525	0.023614	26.2821	34.83
-1.78359	0.024055	26.2987	34.8732
-1.78193	0.024389	26.3154	34.9164
-1.78026	0.024931	26.332	34.9596
-1.7786	0.024757	26.3486	35.0029
-1.77694	0.024022	26.3653	35.0461
-1.77527	0.025115	26.3819	35.089
-1.77361	0.025444	26.3985	35.1325
-1.77195	0.025502	26.4152	35.1758
-1.77029	0.024977	26.4318	35.219
-1.76862	0.025445	26.4484	35.2622
-1.76696	0.025632	26.4651	35.3053
-1.7653	0.025959	26.4817	35.3486
-1.76363	0.026909	26.4983	35.3918
-1.76197	0.028335	26.5149	35.4351
-1.76031	0.026852	26.5316	35.4782
-1.75864	0.027508	26.5482	35.5214
-1.75698	0.027768	26.5648	35.5648
-1.75532	0.026525	26.5815	35.608
-1.75365	0.025584	26.5981	35.6512
-1.75199	0.025285	26.6147	35.6944
-1.75033	0.02467	26.6314	35.7375
-1.74867	0.024868	26.648	35.7809
-1.747	0.025221	26.6646	35.8241
-1.74534	0.025379	26.6813	35.8672
-1.74368	0.025412	26.6979	35.9105
-1.74201	0.025279	26.7145	35.9536
-1.74035	0.025482	26.7312	35.997
-1.73869	0.025895	26.7478	36.0402
-1.73702	0.025745	26.7644	36.0835
-1.73536	0.025604	26.7811	36.1267
-1.7337	0.025176	26.7977	36.1697
-1.73204	0.024705	26.8143	36.2131
-1.73037	0.025689	26.831	36.2562
-1.72871	0.025647	26.8476	36.2996
-1.72705	0.02545	26.8642	36.3428
-1.72538	0.025964	26.8809	36.3859
-1.72372	0.026488	26.8975	36.4292
-1.72206	0.026845	26.9141	36.4725
-1.72039	0.02666	26.9308	36.5156
-1.71873	0.026392	26.9474	36.5589
-1.71707	0.026463	26.964	36.6021
-1.71541	0.02666	26.9807	36.6452
-1.71374	0.028311	26.9973	36.6886
-1.71208	0.02904	27.0139	36.7318
-1.71042	0.029091	27.0306	36.775
-1.70875	0.029324	27.0472	36.8182
-1.70709	0.029633	27.0638	36.8614
-1.70543	0.02886	27.0804	36.9047
-1.70376	0.028196	27.0971	36.9479
-1.7021	0.028182	27.1137	36.9911
-1.70044	0.028234	27.1303	37.0343
-1.69878	0.027692	27.147	37.0776
-1.69711	0.027345	27.1636	37.1208
-1.69545	0.028085	27.1802	37.164
-1.69379	0.028437	27.1969	37.2073
-1.69212	0.028048	27.2135	37.2505
-1.69046	0.027574	27.2301	37.2937
-1.6888	0.02659	27.2468	37.3369
-1.68713	0.026201	27.2634	37.3801
-1.68547	0.026464	27.28	37.4233
-1.68381	0.026553	27.2967	37.4666
-1.68214	0.02659	27.3133	37.5096
-1.68048	0.025468	27.3299	37.553
-1.67882	0.024711	27.3466	37.5962
-1.67716	0.025283	27.3632	37.6395
-1.67549	0.025352	27.3798	37.6827
-1.67383	0.025237	27.3965	37.7257
-1.67217	0.026068	27.4131	37.769
-1.6705	0.026215	27.4297	37.8124
-1.66884	0.025898	27.4464	37.8556
-1.66718	0.026096	27.463	37.8988
-1.66551	0.025539	27.4796	37.9419
-1.66385	0.024883	27.4963	37.9853
-1.66219	0.02446	27.5129	38.0285
-1.66053	0.024141	27.5295	38.0717
-1.65886	0.024464	27.5462	38.1149
-1.6572	0.024273	27.5628	38.158
-1.65554	0.023578	27.5794	38.2014
-1.65387	0.023844	27.5961	38.2446
-1.65221	0.024274	27.6127	38.2878
-1.65055	0.02468	27.6293	38.331
-1.64888	0.025128	27.6459	38.3743
-1.64722	0.02454	27.6626	38.4175
-1.64556	0.024825	27.6792	38.4607
-1.6439	0.025128	27.6958	38.5038
-1.64223	0.024719	27.7125	38.5472
-1.64057	0.02451	27.7291	38.5904
-1.63891	0.02492	27.7457	38.6336
-1.63724	0.025511	27.7624	38.6768
-1.63558	0.02568	27.779	38.7201
-1.63392	0.02568	27.7956	38.7633
-1.63225	0.026133	27.8123	38.8065
-1.63059	0.025058	27.8289	38.8494
-1.62893	0.024057	27.8455	38.8929
-1.62726	0.024182	27.8622	38.9362
-1.6256	0.023943	27.8788	38.9794
-1.62394	0.02362	27.8954	39.0226
-1.62228	0.023823	27.9121	39.0657
-1.62061	0.024071	27.9287	39.1091
-1.61895	0.023561	27.9453	39.1523
-1.61729	0.023305	27.962	39.1954
-1.61562	0.023356	27.9786	39.2387
-1.61396	0.023556	27.9952	39.282
-1.6123	0.023886	28.0118	39.3252
-1.61063	0.024273	28.0285	39.3684
-1.60897	0.024178	28.0451	39.4116
-1.60731	0.023295	28.0617	39.4549
-1.60565	0.023407	28.0784	39.4981
-1.60398	0.023194	28.095	39.5411
-1.60232	0.023234	28.1117	39.5845
-1.60066	0.024027	28.1283	39.6277
-1.59899	0.023952	28.1449	39.6709
-1.59733	0.024595	28.1615	39.7142
-1.59567	0.024798	28.1782	39.7573
-1.594	0.024254	28.1948	39.8006
-1.59234	0.024065	28.2114	39.8439
-1.59068	0.023954	28.2281	39.8871
-1.58902	0.024484	28.2447	39.9303
-1.58735	0.024836	28.2613	39.9735
-1.58569	0.024406	28.278	40.0168
-1.58403	0.023954	28.2946	40.06
-1.58236	0.023911	28.3112	40.1032
-1.5807	0.024113	28.3279	40.1464
[truncated: 30,883 more rows]

## Sheet: SEC
Volume (mL)	Abs 280 nm (mAU)
-2.40618	0
-2.40491	-0.09604
-2.40364	-0.09452
-2.40238	-0.09388
-2.40111	-0.09386
-2.39984	-0.09225
-2.39858	-0.09198
-2.39731	-0.07788
-2.39604	-0.04701
-2.39478	-0.0328
-2.39351	-0.03326
-2.39224	-0.03398
-2.39098	-0.0355
-2.38971	-0.03588
-2.38844	-0.03592
-2.38718	-0.03653
-2.38591	-0.03666
-2.38464	-0.03728
-2.38338	-0.03797
-2.38211	-0.03887
-2.38084	-0.04093
-2.37958	-0.04133
-2.37831	-0.04198
-2.37704	-0.04296
-2.37578	-0.04418
-2.37451	-0.01106
-2.37324	-0.00064
-2.37198	-0.00182
-2.37071	-0.0034
-2.36944	-0.00407
-2.36818	-0.0049
-2.36691	-0.00586
-2.36564	-0.00689
-2.36437	-0.008
-2.36311	-0.00911
-2.36184	-0.01022
-2.36057	-0.01147
-2.35931	-0.0134
-2.35804	-0.01492
-2.35677	-0.01668
-2.35551	-0.01881
-2.35424	-0.02127
-2.35297	-0.02394
-2.35171	-0.02658
-2.35044	-0.02895
-2.34917	-0.03071
-2.34791	-0.03345
-2.34664	-0.03587
-2.34537	-0.03803
-2.34411	-0.04002
-2.34284	-0.0416
-2.34157	-0.04327
-2.34031	-0.04428
-2.33904	-0.04408
-2.33777	-0.04498
-2.33651	-0.04573
-2.33524	-0.04661
-2.33397	-0.04762
-2.33271	-0.04653
-2.33144	-0.0461
-2.33017	-0.04599
-2.32891	-0.04605
-2.32764	-0.04616
-2.32637	-0.04637
-2.32511	-0.04658
-2.32384	-0.04664
-2.32257	-0.04632
-2.3213	-0.04528
-2.32004	-0.04516
-2.31877	-0.0451
-2.3175	-0.04345
-2.31624	-0.04176
-2.31497	-0.04063
-2.3137	-0.03976
-2.31244	-0.03877
-2.31117	-0.03609
-2.3099	-0.03416
-2.30864	-0.03218
-2.30737	-0.02979
-2.3061	-0.02757
-2.30484	-0.02629
-2.30357	-0.02438
-2.3023	-0.02142
-2.30104	-0.01859
-2.29977	-0.01749
-2.2985	-0.01718
-2.29724	-0.01724
-2.29597	-0.01711
-2.2947	-0.01643
-2.29344	-0.0155
-2.29217	-0.01483
-2.2909	-0.01517
-2.28964	-0.01448
-2.28837	-0.01313
-2.2871	-0.01179
-2.28584	-0.01116
-2.28457	-0.01063
-2.2833	-0.01009
-2.28204	-0.00964
-2.28077	-0.00958
-2.2795	-0.00944
-2.27823	-0.00945
-2.27697	-0.00992
-2.2757	-0.01123
-2.27443	-0.01113
-2.27317	-0.01069
-2.2719	-0.01028
-2.27063	-0.0102
-2.26937	-0.0107
-2.2681	-0.01027
-2.26683	-0.01013
-2.26557	-0.01061
-2.2643	-0.01038
-2.26303	-0.00981
-2.26177	-0.01057
-2.2605	-0.01241
-2.25923	-0.01331
-2.25797	-0.01302
-2.2567	-0.01274
-2.25543	-0.01264
-2.25417	-0.01275
-2.2529	-0.01359
-2.25163	-0.01499
-2.25037	-0.01636
-2.2491	-0.01722
-2.24783	-0.01903
-2.24657	-0.02125
-2.2453	-0.0231
-2.24403	-0.02432
-2.24277	-0.02617
-2.2415	-0.02789
-2.24023	-0.02955
-2.23897	-0.03132
-2.2377	-0.03369
-2.23643	-0.03422
-2.23517	-0.03464
-2.2339	-0.03533
-2.23263	-0.03654
-2.23136	-0.037
-2.2301	-0.03735
-2.22883	-0.03802
-2.22756	-0.03963
-2.2263	-0.04004
-2.22503	-0.03977
-2.22376	-0.03931
-2.2225	-0.03967
-2.22123	-0.0408
-2.21996	-0.04106
-2.2187	-0.0411
-2.21743	-0.04232
-2.21616	-0.04171
-2.2149	-0.04163
-2.21363	-0.04142
-2.21236	-0.04037
-2.2111	-0.03919
-2.20983	-0.03833
-2.20856	-0.03754
-2.2073	-0.03673
-2.20603	-0.0366
-2.20476	-0.03552
-2.2035	-0.03468
-2.20223	-0.03406
-2.20096	-0.03199
-2.1997	-0.02913
-2.19843	-0.02597
-2.19716	-0.02262
-2.1959	-0.01913
-2.19463	-0.0157
-2.19336	-0.0123
-2.1921	-0.00897
-2.19083	-0.00577
-2.18956	-0.00299
-2.18829	0.00019
-2.18703	0.004125
-2.18576	0.008802
-2.18449	0.011339
-2.18323	0.014106
-2.18196	0.017321
-2.18069	0.021057
-2.17943	0.025332
-2.17816	0.029347
-2.17689	0.033565
-2.17563	0.038383
-2.17436	0.041973
-2.17309	0.045949
-2.17183	0.049859
-2.17056	0.053364
-2.16929	0.056042
-2.16803	0.059898
-2.16676	0.063532
-2.16549	0.066776
-2.16423	0.070875
-2.16296	0.075423
-2.16169	0.079233
-2.16043	0.082134
-2.15916	0.084238
-2.15789	0.087249
-2.15663	0.089999
-2.15536	0.092211
-2.15409	0.09367
-2.15283	0.095586
-2.15156	0.097631
-2.15029	0.099426
-2.14903	0.100725
-2.14776	0.102017
-2.14649	0.102266
-2.14523	0.10233
-2.14396	0.10264
-2.14269	0.103368
-2.14142	0.103233
-2.14016	0.103543
-2.13889	0.10432
-2.13762	0.10473
-2.13636	0.105001
-2.13509	0.104464
-2.13382	0.103631
-2.13256	0.103427
-2.13129	0.103997
-2.13002	0.103247
-2.12876	0.102471
-2.12749	0.102862
-2.12622	0.102397
-2.12496	0.101891
-2.12369	0.101693
-2.12242	0.102547
-2.12116	0.103639
-2.11989	0.106578
-2.11862	0.110261
-2.11736	0.113151
-2.11609	0.111207
-2.11482	0.110335
-2.11356	0.109939
-2.11229	0.109458
-2.11102	0.10787
-2.10976	0.106663
-2.10849	0.106082
-2.10722	0.106053
-2.10596	0.105651
-2.10469	0.105247
-2.10342	0.105056
-2.10216	0.105031
-2.10089	0.104888
-2.09962	0.104362
-2.09836	0.103515
-2.09709	0.102684
-2.09582	0.102391
-2.09455	0.102196
-2.09329	0.10185
-2.09202	0.101248
-2.09075	0.100323
-2.08949	0.099311
-2.08822	0.099073
-2.08695	0.09901
-2.08569	0.098728
-2.08442	0.097804
-2.08315	0.098265
-2.08189	0.098233
-2.08062	0.097074
-2.07935	0.094583
-2.07809	0.090611
-2.07682	0.086901
-2.07555	0.084479
-2.07429	0.084691
-2.07302	0.084297
-2.07175	0.084123
-2.07049	0.084282
-2.06922	0.084629
-2.06795	0.084295
-2.06669	0.083956
-2.06542	0.083767
-2.06415	0.083733
-2.06289	0.084648
-2.06162	0.084631
-2.06035	0.08392
-2.05909	0.083165
-2.05782	0.083946
-2.05655	0.084172
-2.05529	0.084075
-2.05402	0.083912
-2.05275	0.083667
-2.05148	0.084543
-2.05022	0.085117
-2.04895	0.084839
-2.04768	0.085021
-2.04642	0.084936
-2.04515	0.084619
-2.04388	0.084541
-2.04262	0.086176
-2.04135	0.08623
-2.04008	0.085929
-2.03882	0.085522
-2.03755	0.085106
-2.03628	0.084761
-2.03502	0.084759
-2.03375	0.08492
-2.03248	0.084999
-2.03122	0.08359
-2.02995	0.082724
-2.02868	0.082446
-2.02742	0.082626
-2.02615	0.081865
-2.02488	0.081169
-2.02362	0.080571
-2.02235	0.080053
-2.02108	0.079477
-2.01982	0.078618
-2.01855	0.077857
-2.01728	0.077348
-2.01602	0.076522
-2.01475	0.07554
-2.01348	0.074616
-2.01222	0.073916
-2.01095	0.073785
-2.00968	0.0734
-2.00842	0.072644
-2.00715	0.071695
-2.00588	0.071251
-2.00461	0.070448
-2.00335	0.069421
-2.00208	0.067976
-2.00081	0.065712
-1.99955	0.064056
-1.99828	0.062741
-1.99701	0.061832
-1.99575	0.06139
-1.99448	0.060359
-1.99321	0.05951
-1.99195	0.058803
-1.99068	0.058292
-1.98941	0.058786
-1.98815	0.058404
-1.98688	0.057279
-1.98561	0.055765
-1.98435	0.054885
-1.98308	0.053923
-1.98181	0.052759
-1.98055	0.051886
-1.97928	0.052337
-1.97801	0.052389
-1.97675	0.052296
-1.97548	0.051983
-1.97421	0.051354
-1.97295	0.050414
-1.97168	0.049423
-1.97041	0.047817
-1.96915	0.045385
-1.96788	0.043992
-1.96661	0.043307
-1.96535	0.042664
-1.96408	0.04157
-1.96281	0.04125
-1.96154	0.040808
-1.96028	0.040398
-1.95901	0.040187
-1.95774	0.039966
-1.95648	0.040075
-1.95521	0.039541
-1.95394	0.038004
-1.95268	0.037027
-1.95141	0.036638
-1.95014	0.036629
-1.94888	0.036695
-1.94761	0.035998
-1.94634	0.035158
-1.94508	0.035071
-1.94381	0.035339
-1.94254	0.034826
-1.94128	0.034757
-1.94001	0.03487
-1.93874	0.034791
-1.93748	0.034103
-1.93621	0.034439
-1.93494	0.034454
-1.93368	0.034287
-1.93241	0.034004
-1.93114	0.033124
-1.92988	0.032515
-1.92861	0.032257
-1.92734	0.032339
-1.92608	0.032561
-1.92481	0.032711
-1.92354	0.032835
-1.92228	0.032711
-1.92101	0.031734
-1.91974	0.030701
-1.91848	0.029819
-1.91721	0.028931
-1.91594	0.027771
-1.91467	0.026848
-1.91341	0.026722
-1.91214	0.026956
-1.91087	0.026956
-1.90961	0.025863
-1.90834	0.024377
-1.90707	0.022759
-1.90581	0.021285
-1.90454	0.020983
-1.90327	0.018944
-1.90201	0.016565
-1.90074	0.01571
-1.89947	0.014743
-1.89821	0.013685
-1.89694	0.012589
-1.89567	0.011545
-1.89441	0.011118
-1.89314	0.010472
-1.89187	0.009834
-1.89061	0.009278
-1.88934	0.008692
-1.88807	0.008526
-1.88681	0.008474
-1.88554	0.008123
-1.88427	0.006594
-1.88301	0.005698
-1.88174	0.004632
-1.88047	0.003563
-1.87921	0.002932
-1.87794	0.003129
-1.87667	0.003266
-1.87541	0.003388
-1.87414	0.003566
-1.87287	0.00322
-1.8716	0.003195
-1.87034	0.003175
-1.86907	0.003087
-1.8678	0.004026
-1.86654	0.003385
-1.86527	0.00273
-1.864	0.002416
-1.86274	0.001598
-1.86147	0.002546
-1.8602	0.003901
-1.85894	0.00524
-1.85767	0.00506
-1.8564	0.004058
-1.85514	0.002782
-1.85387	0.001465
-1.8526	-0.00016
-1.85134	-0.0009
-1.85007	-0.00139
-1.8488	-0.00163
-1.84754	-0.00114
-1.84627	-0.00201
-1.845	-0.00256
-1.84374	-0.00292
-1.84247	-0.00377
-1.8412	-0.0047
-1.83994	-0.00533
-1.83867	-0.00553
-1.8374	-0.00522
-1.83614	-0.00552
-1.83487	-0.00595
-1.8336	-0.00658
-1.83234	-0.00746
-1.83107	-0.00834
-1.8298	-0.00966
-1.82854	-0.01069
-1.82727	-0.01138
-1.826	-0.01255
-1.82473	-0.01339
-1.82347	-0.01415
-1.8222	-0.01471
-1.82093	-0.01477
-1.81967	-0.01534
-1.8184	-0.01671
-1.81713	-0.01841
-1.81587	-0.01981
-1.8146	-0.01981
-1.81333	-0.01952
-1.81207	-0.01947
-1.8108	-0.01999
-1.80953	-0.02021
-1.80827	-0.0218
-1.807	-0.02325
-1.80573	-0.02396
-1.80447	-0.02478
-1.8032	-0.02526
-1.80193	-0.02581
-1.80067	-0.02686
-1.7994	-0.0263
-1.79813	-0.02665
-1.79687	-0.02744
-1.7956	-0.0284
-1.79433	-0.02981
-1.79307	-0.03054
-1.7918	-0.03069
-1.79053	-0.03041
-1.78927	-0.0302
-1.788	-0.02914
-1.78673	-0.02852
-1.78547	-0.02871
-1.7842	-0.0299
-1.78293	-0.02835
-1.78166	-0.02777
-1.7804	-0.02791
-1.77913	-0.02799
-1.77786	-0.02842
-1.7766	-0.02833
-1.77533	-0.02808
-1.77406	-0.02797
-1.7728	-0.02774
-1.77153	-0.0284
-1.77026	-0.02911
-1.769	-0.0296
-1.76773	-0.03096
-1.76646	-0.03099
-1.7652	-0.03127
-1.76393	-0.03192
-1.76266	-0.03179
-1.7614	-0.03276
-1.76013	-0.03287
-1.75886	-0.03265
-1.7576	-0.03351
-1.75633	-0.03398
-1.75506	-0.03522
-1.7538	-0.03619
-1.75253	-0.03575
-1.75126	-0.03594
-1.75	-0.03652
-1.74873	-0.03737
-1.74746	-0.03818
-1.7462	-0.03973
-1.74493	-0.04107
-1.74366	-0.04181
-1.7424	-0.04151
-1.74113	-0.04359
-1.73986	-0.04488
-1.7386	-0.04599
-1.73733	-0.04739
-1.73606	-0.04765
-1.73479	-0.0485
-1.73353	-0.04901
-1.73226	-0.04893
-1.73099	-0.04981
-1.72973	-0.05011
-1.72846	-0.05029
-1.72719	-0.05046
-1.72593	-0.05058
-1.72466	-0.05056
-1.72339	-0.05054
-1.72213	-0.05059
-1.72086	-0.05081
-1.71959	-0.0515
-1.71833	-0.05192
-1.71706	-0.05188
-1.71579	-0.05124
-1.71453	-0.05113
-1.71326	-0.05059
-1.71199	-0.05051
-1.71073	-0.05137
-1.70946	-0.05194
-1.70819	-0.05179
-1.70693	-0.05151
-1.70566	-0.05143
-1.70439	-0.0519
-1.70313	-0.05219
-1.70186	-0.0527
-1.70059	-0.0532
-1.69933	-0.05295
-1.69806	-0.0528
-1.69679	-0.05245
-1.69553	-0.05181
-1.69426	-0.05137
-1.69299	-0.05235
-1.69173	-0.054
-1.69046	-0.05561
-1.68919	-0.05576
-1.68792	-0.05563
-1.68666	-0.05584
-1.68539	-0.05637
-1.68412	-0.05701
-1.68286	-0.05767
-1.68159	-0.05779
-1.68032	-0.05747
-1.67906	-0.05684
-1.67779	-0.05631
-1.67652	-0.05627
-1.67526	-0.05698
-1.67399	-0.05839
-1.67272	-0.05868
-1.67146	-0.05939
-1.67019	-0.05967
-1.66892	-0.05939
-1.66766	-0.05942
-1.66639	-0.05994
-1.66512	-0.06045
-1.66386	-0.06082
-1.66259	-0.06092
-1.66132	-0.06191
-1.66006	-0.06218
-1.65879	-0.06213
-1.65752	-0.06248
-1.65626	-0.06163
-1.65499	-0.06118
-1.65372	-0.06125
-1.65246	-0.06177
-1.65119	-0.06082
-1.64992	-0.05916
-1.64866	-0.05823
-1.64739	-0.0585
-1.64612	-0.05868
-1.64485	-0.0582
-1.64359	-0.05769
-1.64232	-0.05777
-1.64105	-0.05726
-1.63979	-0.05751
-1.63852	-0.05824
-1.63725	-0.05915
-1.63599	-0.05955
-1.63472	-0.06017
-1.63345	-0.06028
-1.63219	-0.05997
-1.63092	-0.06093
-1.62965	-0.06122
-1.62839	-0.06133
-1.62712	-0.06135
-1.62585	-0.06127
-1.62459	-0.06217
-1.62332	-0.0626
-1.62205	-0.06283
-1.62079	-0.06341
-1.61952	-0.06243
-1.61825	-0.06266
-1.61699	-0.06318
-1.61572	-0.06331
-1.61445	-0.06491
-1.61319	-0.06622
-1.61192	-0.06721
-1.61065	-0.06791
-1.60939	-0.06868
-1.60812	-0.07028
-1.60685	-0.07142
-1.60559	-0.07206
-1.60432	-0.0731
-1.60305	-0.07414
-1.60178	-0.07458
-1.60052	-0.07501
-1.59925	-0.07657
-1.59798	-0.07724
-1.59672	-0.07788
-1.59545	-0.07853
-1.59418	-0.07919
-1.59292	-0.07917
-1.59165	-0.07925
-1.59038	-0.07943
-1.58912	-0.07963
-1.58785	-0.07947
-1.58658	-0.07947
-1.58532	-0.07968
-1.58405	-0.0801
-1.58278	-0.07976
-1.58152	-0.08031
-1.58025	-0.08078
-1.57898	-0.0805
-1.57772	-0.08145
-1.57645	-0.08155
-1.57518	-0.08156
-1.57392	-0.0818
-1.57265	-0.082
-1.57138	-0.08199
-1.57012	-0.08219
-1.56885	-0.08255
-1.56758	-0.08259
-1.56632	-0.08141
-1.56505	-0.08095
-1.56378	-0.08108
-1.56252	-0.08112
-1.56125	-0.08192
-1.55998	-0.08247
-1.55872	-0.08244
-1.55745	-0.0816
-1.55618	-0.08178
-1.55491	-0.08219
-1.55365	-0.08232
-1.55238	-0.08202
-1.55111	-0.08275
-1.54985	-0.08408
-1.54858	-0.08496
-1.54731	-0.08529
-1.54605	-0.08623
-1.54478	-0.08647
-1.54351	-0.08732
-1.54225	-0.08847
-1.54098	-0.08873
-1.53971	-0.08868
-1.53845	-0.08881
-1.53718	-0.08907
-1.53591	-0.08879
-1.53465	-0.0894
-1.53338	-0.09014
-1.53211	-0.09083
-1.53085	-0.09156
-1.52958	-0.09241
-1.52831	-0.09284
-1.52705	-0.09301
-1.52578	-0.09337
-1.52451	-0.09372
-1.52325	-0.09413
-1.52198	-0.09451
-1.52071	-0.09474
-1.51945	-0.09426
-1.51818	-0.09383
-1.51691	-0.09381
-1.51565	-0.09435
-1.51438	-0.09467
-1.51311	-0.09507
-1.51185	-0.09566
-1.51058	-0.09628
-1.50931	-0.09633
-1.50804	-0.0956
-1.50678	-0.09524
-1.50551	-0.09517
-1.50424	-0.09466
-1.50298	-0.09518
-1.50171	-0.09509
-1.50044	-0.0948
-1.49918	-0.09497
-1.49791	-0.09555
-1.49664	-0.09603
-1.49538	-0.09665
-1.49411	-0.09751
-1.49284	-0.09715
-1.49158	-0.09744
-1.49031	-0.09758
-1.48904	-0.09729
-1.48778	-0.09704
-1.48651	-0.09715
-1.48524	-0.09714
-1.48398	-0.09685
-1.48271	-0.09824
-1.48144	-0.09812
-1.48018	-0.09762
-1.47891	-0.09747
-1.47764	-0.09784
-1.47638	-0.09824
-1.47511	-0.09865
-1.47384	-0.09907
-1.47258	-0.09943
-1.47131	-0.09849
-1.47004	-0.0974
-1.46878	-0.09659
-1.46751	-0.09646
-1.46624	-0.09686
-1.46497	-0.09674
-1.46371	-0.09659
-1.46244	-0.09712
-1.46117	-0.09761
-1.45991	-0.09742
-1.45864	-0.09733
-1.45737	-0.09784
-1.45611	-0.09729
-1.45484	-0.09761
-1.45357	-0.09755
-1.45231	-0.09679
-1.45104	-0.09687
-1.44977	-0.09674
-1.44851	-0.0965
-1.44724	-0.09636
-1.44597	-0.09688
-1.44471	-0.09687
-1.44344	-0.09749
-1.44217	-0.09806
-1.44091	-0.09723
-1.43964	-0.09708
-1.43837	-0.0973
-1.43711	-0.09771
-1.43584	-0.09813
-1.43457	-0.09887
-1.43331	-0.09923
-1.43204	-0.09918
-1.43077	-0.09841
-1.42951	-0.09929
-1.42824	-0.10085
-1.42697	-0.10225
-1.42571	-0.1025
-1.42444	-0.10253
-1.42317	-0.10279
-1.42191	-0.10244
-1.42064	-0.10096
-1.41937	-0.10012
-1.4181	-0.09993
-1.41684	-0.09934
-1.41557	-0.09817
-1.4143	-0.09823
-1.41304	-0.09758
-1.41177	-0.09745
-1.4105	-0.098
-1.40924	-0.09873
-1.40797	-0.09875
-1.4067	-0.09846
-1.40544	-0.09798
-1.40417	-0.0974
-1.4029	-0.09786
-1.40164	-0.0975
-1.40037	-0.09727
-1.3991	-0.09811
-1.39784	-0.09866
-1.39657	-0.09826
-1.3953	-0.09775
-1.39404	-0.09752
-1.39277	-0.09675
-1.3915	-0.09666
-1.39024	-0.09675
-1.38897	-0.09681
-1.3877	-0.09677
-1.38644	-0.09647
-1.38517	-0.09616
-1.3839	-0.0961
-1.38264	-0.09679
-1.38137	-0.09677
-1.3801	-0.0971
-1.37884	-0.09769
-1.37757	-0.09837
-1.3763	-0.09933
-1.37503	-0.1009
-1.37377	-0.10288
-1.3725	-0.10449
-1.37123	-0.10564
-1.36997	-0.10607
-1.3687	-0.10603
-1.36743	-0.10605
-1.36617	-0.1067
-1.3649	-0.10789
-1.36363	-0.1091
-1.36237	-0.10986
-1.3611	-0.11055
-1.35983	-0.1111
-1.35857	-0.11144
-1.3573	-0.11153
-1.35603	-0.11122
-1.35477	-0.11211
-1.3535	-0.11301
-1.35223	-0.1135
-1.35097	-0.11359
-1.3497	-0.11361
-1.34843	-0.11416
-1.34717	-0.11494
-1.3459	-0.11504
-1.34463	-0.11498
-1.34337	-0.11535
-1.3421	-0.11594
-1.34083	-0.11641
-1.33957	-0.11683
-1.3383	-0.11775
-1.33703	-0.11865
-1.33577	-0.11913
-1.3345	-0.11903
-1.33323	-0.1182
-1.33197	-0.11751
-1.3307	-0.11732
-1.32943	-0.11747
-1.32816	-0.11762
-1.3269	-0.11739
-1.32563	-0.11677
-1.32436	-0.11566
-1.3231	-0.11491
-1.32183	-0.11448
-1.32056	-0.11435
-1.3193	-0.11448
-1.31803	-0.11483
-1.31676	-0.11504
-1.3155	-0.11508
-1.31423	-0.11547
-1.31296	-0.11582
-1.3117	-0.11572
-1.31043	-0.1153
-1.30916	-0.115
-1.3079	-0.11517
-1.30663	-0.11525
-1.30536	-0.11504
-1.3041	-0.11434
-1.30283	-0.11405
-1.30156	-0.11384
-1.3003	-0.11329
-1.29903	-0.11217
-1.29776	-0.11155
-1.2965	-0.11132
-1.29523	-0.11136
-1.29396	-0.11142
-1.2927	-0.11057
-1.29143	-0.11131
-1.29016	-0.1122
-1.2889	-0.11253
-1.28763	-0.11145
-1.28636	-0.11155
-1.28509	-0.11223
-1.28383	-0.11328
-1.28256	-0.11456
-1.28129	-0.11437
-1.28003	-0.11402
-1.27876	-0.11353
-1.27749	-0.11292
-1.27623	-0.11263
-1.27496	-0.11227
-1.27369	-0.11218
-1.27243	-0.11249
-1.27116	-0.11248
-1.26989	-0.11297
-1.26863	-0.11374
-1.26736	-0.11442
-1.26609	-0.11398
-1.26483	-0.11344
-1.26356	-0.11351
-1.26229	-0.11458
-1.26103	-0.1148
-1.25976	-0.11462
-1.25849	-0.11478
-1.25723	-0.11554
-1.25596	-0.1167
-1.25469	-0.1165
-1.25343	-0.11602
-1.25216	-0.11591
-1.25089	-0.11711
-1.24963	-0.1164
-1.24836	-0.11585
-1.24709	-0.11592
-1.24583	-0.11698
-1.24456	-0.1168
-1.24329	-0.11658
-1.24203	-0.11593
-1.24076	-0.11462
-1.23949	-0.11456
-1.23822	-0.11459
-1.23696	-0.11453
-1.23569	-0.11425
-1.23442	-0.11351
-1.23316	-0.11371
-1.23189	-0.11403
-1.23062	-0.11422
-1.22936	-0.11416
-1.22809	-0.11421
-1.22682	-0.11398
-1.22556	-0.11358
-1.22429	-0.11324
-1.22302	-0.11384
-1.22176	-0.11441
-1.22049	-0.11496
-1.21922	-0.11548
-1.21796	-0.11635
-1.21669	-0.11717
-1.21542	-0.11761
-1.21416	-0.11706
-1.21289	-0.11747
-1.21162	-0.11794
-1.21036	-0.11853
-1.20909	-0.11936
-1.20782	-0.11964
-1.20656	-0.11904
-1.20529	-0.11854
-1.20402	-0.11887
-1.20276	-0.11951
-1.20149	-0.11971
-1.20022	-0.12028
-1.19896	-0.12139
-1.19769	-0.12194
-1.19642	-0.12225
-1.19515	-0.12234
-1.19389	-0.12243
-1.19262	-0.12308
-1.19135	-0.12351
-1.19009	-0.12386
-1.18882	-0.12426
-1.18755	-0.1249
-1.18629	-0.12436
-1.18502	-0.12485
-1.18375	-0.12562
-1.18249	-0.12586
-1.18122	-0.12475
-1.17995	-0.12408
-1.17869	-0.12373
-1.17742	-0.12352
-1.17615	-0.12284
-1.17489	-0.12204
-1.17362	-0.12156
-1.17235	-0.1212
-1.17109	-0.1197
-1.16982	-0.1192
-1.16855	-0.11833
-1.16729	-0.1176
-1.16602	-0.11852
-1.16475	-0.11869
-1.16349	-0.11854
-1.16222	-0.11832
-1.16095	-0.11885
-1.15969	-0.11908
-1.15842	-0.11929
-1.15715	-0.11952
-1.15589	-0.11969
-1.15462	-0.11996
-1.15335	-0.12077
-1.15209	-0.12173
-1.15082	-0.12211
-1.14955	-0.12162
-1.14828	-0.12165
-1.14702	-0.12149
-1.14575	-0.12051
-1.14448	-0.12077
-1.14322	-0.12152
-1.14195	-0.12265
-1.14068	-0.12397
-1.13942	-0.12475
-1.13815	-0.12466
-1.13688	-0.12452
-1.13562	-0.12473
-1.13435	-0.12578
-1.13308	-0.12688
-1.13182	-0.12768
-1.13055	-0.12844
-1.12928	-0.12992
-1.12802	-0.1309
-1.12675	-0.13147
-1.12548	-0.13187
-1.12422	-0.13241
-1.12295	-0.13273
-1.12168	-0.13303
-1.12042	-0.13322
-1.11915	-0.13319
-1.11788	-0.13282
-1.11662	-0.13287
-1.11535	-0.1332
-1.11408	-0.13359
-1.11282	-0.13324
-1.11155	-0.13294
-1.11028	-0.13267
-1.10902	-0.13245
-1.10775	-0.1334
-1.10648	-0.1336
-1.10521	-0.13381
-1.10395	-0.13452
-1.10268	-0.13563
-1.10141	-0.1356
-1.10015	-0.13559
-1.09888	-0.13605
-1.09761	-0.1369
-1.09635	-0.1388
-1.09508	-0.1398
-1.09381	-0.13993
-1.09255	-0.14028
-1.09128	-0.14008
-1.09001	-0.14018
-1.08875	-0.14067
-1.08748	-0.14152
-1.08621	-0.14186
-1.08495	-0.14213
-1.08368	-0.14199
-1.08241	-0.14127
-1.08115	-0.14169
-1.07988	-0.14152
-1.07861	-0.14124
-1.07735	-0.14121
-1.07608	-0.14216
-1.07481	-0.14187
-1.07355	-0.14138
-1.07228	-0.14115
-1.07101	-0.1418
-1.06975	-0.14161
-1.06848	-0.14187
-1.06721	-0.14221
-1.06595	-0.14168
-1.06468	-0.14163
-1.06341	-0.14159
-1.06215	-0.14122
-1.06088	-0.14025
-1.05961	-0.14008
-1.05834	-0.13957
-1.05708	-0.139
-1.05581	-0.13901
-1.05454	-0.13719
-1.05328	-0.13677
-1.05201	-0.13698
-1.05074	-0.1363
-1.04948	-0.13652
-1.04821	-0.13637
-1.04694	-0.13576
-1.04568	-0.13468
-1.04441	-0.13387
-1.04314	-0.13363
-1.04188	-0.13331
-1.04061	-0.13269
-1.03934	-0.13239
-1.03808	-0.1333
-1.03681	-0.13388
-1.03554	-0.13376
-1.03428	-0.13311
-1.03301	-0.13256
-1.03174	-0.13224
-1.03048	-0.13225
-1.02921	-0.13275
-1.02794	-0.1322
-1.02668	-0.13209
-1.02541	-0.1327
-1.02414	-0.1342
-1.02288	-0.1348
-1.02161	-0.13531
-1.02034	-0.13549
-1.01908	-0.13533
-1.01781	-0.13612
-1.01654	-0.13622
-1.01528	-0.13641
-1.01401	-0.13706
-1.01274	-0.13843
-1.01147	-0.13854
-1.01021	-0.13836
-1.00894	-0.13812
-1.00767	-0.13788
-1.00641	-0.13841
-1.00514	-0.13933
-1.00387	-0.1405
-1.00261	-0.1409
-1.00134	-0.14095
-1.00007	-0.14146
-0.99881	-0.14241
-0.99754	-0.14295
-0.99627	-0.14274
-0.99501	-0.14271
-0.99374	-0.14298
-0.99247	-0.14352
-0.99121	-0.14495
-0.98994	-0.14637
-0.98867	-0.14754
-0.98741	-0.14827
-0.98614	-0.14957
-0.98487	-0.14954
-0.98361	-0.14849
-0.98234	-0.14683
-0.98107	-0.14649
-0.97981	-0.14628
-0.97854	-0.14614
-0.97727	-0.14598
-0.97601	-0.14559
-0.97474	-0.14556
-0.97347	-0.14491
-0.97221	-0.14402
-0.97094	-0.14445
-0.96967	-0.1451
-0.9684	-0.14561
-0.96714	-0.14598
-0.96587	-0.14624
-0.9646	-0.14526
-0.96334	-0.14448
-0.96207	-0.1439
-0.9608	-0.14359
-0.95954	-0.14509
-0.95827	-0.14535
-0.957	-0.14561
-0.95574	-0.14629
-0.95447	-0.14611
-0.9532	-0.14584
-0.95194	-0.14523
-0.95067	-0.14415
-0.9494	-0.14417
-0.94814	-0.14345
-0.94687	-0.14303
-0.9456	-0.14342
-0.94434	-0.14264
-0.94307	-0.14303
-0.9418	-0.14394
-0.94054	-0.14496
-0.93927	-0.1455
-0.938	-0.14586
-0.93674	-0.14607
-0.93547	-0.14591
-0.9342	-0.14485
-0.93294	-0.14479
-0.93167	-0.14545
-0.9304	-0.14607
-0.92914	-0.1456
-0.92787	-0.14518
-0.9266	-0.14478
-0.92533	-0.14441
-0.92407	-0.14417
-0.9228	-0.14529
-0.92153	-0.14554
-0.92027	-0.14569
-0.919	-0.14598
-0.91773	-0.14546
-0.91647	-0.14567
-0.9152	-0.1459
-0.91393	-0.14583
-0.91267	-0.14502
-0.9114	-0.14449
-0.91013	-0.14531
-0.90887	-0.14669
-0.9076	-0.14692
-0.90633	-0.14684
-0.90507	-0.14593
-0.9038	-0.14502
-0.90253	-0.14501
-0.90127	-0.14478
-0.9	-0.14428
-0.89873	-0.14375
-0.89747	-0.14338
-0.8962	-0.14246
-0.89493	-0.1422
-0.89367	-0.14254
-0.8924	-0.14319
-0.89113	-0.14306
-0.88987	-0.14289
-0.8886	-0.14298
-0.88733	-0.14353
-0.88607	-0.14323
-0.8848	-0.14381
-0.88353	-0.14479
-0.88227	-0.14576
-0.881	-0.14576
-0.87973	-0.14624
-0.87846	-0.14678
-0.8772	-0.14716
-0.87593	-0.14692
-0.87466	-0.14694
-0.8734	-0.14674
-0.87213	-0.14655
-0.87086	-0.14691
-0.8696	-0.14812
-0.86833	-0.14858
-0.86706	-0.14863
-0.8658	-0.14875
-0.86453	-0.14943
-0.86326	-0.14976
-0.862	-0.14998
-0.86073	-0.15024
-0.85946	-0.15041
-0.8582	-0.15104
-0.85693	-0.1514
-0.85566	-0.15145
-0.8544	-0.15223
-0.85313	-0.15259
-0.85186	-0.15305
-0.8506	-0.15355
-0.84933	-0.1537
-0.84806	-0.15486
-0.8468	-0.15488
-0.84553	-0.1543
-0.84426	-0.15434
-0.843	-0.15424
-0.84173	-0.15394
-0.84046	-0.15352
-0.8392	-0.15331
-0.83793	-0.15396
-0.83666	-0.15409
-0.8354	-0.15393
-0.83413	-0.15424
-0.83286	-0.15417
-0.83159	-0.15364
-0.83033	-0.1537
-0.82906	-0.15538
-0.82779	-0.15529
-0.82653	-0.15495
-0.82526	-0.15455
-0.82399	-0.15426
-0.82273	-0.15456
-0.82146	-0.15446
-0.82019	-0.15441
-0.81893	-0.15445
-0.81766	-0.15406
-0.81639	-0.1538
-0.81513	-0.15383
-0.81386	-0.15411
-0.81259	-0.15453
-0.81133	-0.15456
-0.81006	-0.15489
-0.80879	-0.15564
-0.80753	-0.15687
-0.80626	-0.1551
-0.80499	-0.15481
-0.80373	-0.15531
-0.80246	-0.15588
-0.80119	-0.15558
-0.79993	-0.15515
-0.79866	-0.15519
-0.79739	-0.15577
-0.79613	-0.1556
-0.79486	-0.15579
-0.79359	-0.15576
-0.79233	-0.15546
-0.79106	-0.15523
-0.78979	-0.15589
-0.78852	-0.15597
-0.78726	-0.15482
-0.78599	-0.15506
-0.78472	-0.15518
-0.78346	-0.15573
-0.78219	-0.15648
-0.78092	-0.15561
-0.77966	-0.15621
-0.77839	-0.15697
-0.77712	-0.1577
-0.77586	-0.15861
-0.77459	-0.15882
-0.77332	-0.15933
-0.77206	-0.15968
-0.77079	-0.15913
-0.76952	-0.16003
-0.76826	-0.15956
-0.76699	-0.15836
-0.76572	-0.15721
-0.76446	-0.15868
-0.76319	-0.15935
-0.76192	-0.15926
-0.76066	-0.15861
-0.75939	-0.1586
-0.75812	-0.15904
-0.75686	-0.15867
-0.75559	-0.1577
-0.75432	-0.15773
-0.75306	-0.15839
-0.75179	-0.15845
-0.75052	-0.15823
-0.74926	-0.1586
-0.74799	-0.15825
-0.74672	-0.15848
-0.74546	-0.15877
-0.74419	-0.15854
-0.74292	-0.15845
-0.74165	-0.15765
-0.74039	-0.15728
-0.73912	-0.15791
-0.73785	-0.15711
-0.73659	-0.15699
-0.73532	-0.15745
-0.73405	-0.15822
-0.73279	-0.15803
-0.73152	-0.15776
-0.73025	-0.15809
-0.72899	-0.15937
-0.72772	-0.15939
-0.72645	-0.15916
-0.72519	-0.15963
-0.72392	-0.16074
-0.72265	-0.15956
-0.72139	-0.15882
-0.72012	-0.15879
-0.71885	-0.15941
-0.71759	-0.16016
-0.71632	-0.16004
-0.71505	-0.16075
-0.71379	-0.16161
-0.71252	-0.16102
-0.71125	-0.16048
-0.70999	-0.16097
-0.70872	-0.16164
-0.70745	-0.16165
-0.70619	-0.16209
-0.70492	-0.16196
-0.70365	-0.16133
-0.70239	-0.16042
-0.70112	-0.16048
-0.69985	-0.16118
-0.69858	-0.16158
-0.69732	-0.16172
-0.69605	-0.16297
-0.69478	-0.16269
-0.69352	-0.16196
-0.69225	-0.16136
-0.69098	-0.16162
-0.68972	-0.16108
-0.68845	-0.15986
-0.68718	-0.15887
-0.68592	-0.15926
-0.68465	-0.15947
-0.68338	-0.15937
-0.68212	-0.15932
-0.68085	-0.16058
-0.67958	-0.16163
-0.67832	-0.16144
-0.67705	-0.16069
-0.67578	-0.16077
-0.67452	-0.16074
-0.67325	-0.1599
-0.67198	-0.15863
-0.67072	-0.15743
-0.66945	-0.15669
-0.66818	-0.15672
-0.66692	-0.15698
-0.66565	-0.15712
-0.66438	-0.15685
-0.66312	-0.15669
-0.66185	-0.15704
-0.66058	-0.15771
-0.65932	-0.15739
-0.65805	-0.15722
-0.65678	-0.15671
-0.65552	-0.15592
-0.65425	-0.15517
-0.65298	-0.15521
-0.65171	-0.15551
-0.65045	-0.15561
-0.64918	-0.15493
-0.64791	-0.15573
-0.64665	-0.15616
-0.64538	-0.15588
-0.64411	-0.15477
-0.64285	-0.15432
-0.64158	-0.1537
-0.64031	-0.15325
-0.63905	-0.15306
-0.63778	-0.15259
-0.63651	-0.1541
-0.63525	-0.15462
-0.63398	-0.15403
-0.63271	-0.15418
-0.63145	-0.1541
-0.63018	-0.15447
-0.62891	-0.15551
-0.62765	-0.15593
-0.62638	-0.15607
-0.62511	-0.15645
-0.62385	-0.15727
-0.62258	-0.15861
-0.62131	-0.15963
-0.62005	-0.16029
-0.61878	-0.16072
-0.61751	-0.16122
-0.61625	-0.1603
-0.61498	-0.16045
-0.61371	-0.16122
-0.61245	-0.16181
-0.61118	-0.16205
-0.60991	-0.1621
-0.60864	-0.16255
-0.60738	-0.16372
-0.60611	-0.1638
-0.60484	-0.16481
-0.60358	-0.16543
-0.60231	-0.16543
-0.60104	-0.1667
-0.59978	-0.16655
-0.59851	-0.16595
-0.59724	-0.16544
-0.59598	-0.16576
-0.59471	-0.1651
-0.59344	-0.16516
-0.59218	-0.16563
-0.59091	-0.16568
-0.58964	-0.16649
-0.58838	-0.16632
-0.58711	-0.16589
-0.58584	-0.1659
-0.58458	-0.16373
-0.58331	-0.16278
-0.58204	-0.16196
-0.58078	-0.16083
-0.57951	-0.16085
-0.57824	-0.16118
-0.57698	-0.16147
-0.57571	-0.16137
-0.57444	-0.16184
-0.57318	-0.16172
-0.57191	-0.16132
-0.57064	-0.16094
-0.56938	-0.16089
-0.56811	-0.16067
-0.56684	-0.16041
-0.56558	-0.16001
-0.56431	-0.15863
-0.56304	-0.15807
-0.56177	-0.15833
-0.56051	-0.1589
-0.55924	-0.15842
-0.55797	-0.15843
-0.55671	-0.15877
-0.55544	-0.15905
-0.55417	-0.15872
-0.55291	-0.15879
-0.55164	-0.15885
-0.55037	-0.15891
-0.54911	-0.15903
-0.54784	-0.16003
-0.54657	-0.16137
-0.54531	-0.1625
-0.54404	-0.1632
-0.54277	-0.16421
-0.54151	-0.16384
-0.54024	-0.16388
-0.53897	-0.16455
-0.53771	-0.16447
-0.53644	-0.16412
-0.53517	-0.16389
-0.53391	-0.16396
-0.53264	-0.16456
-0.53137	-0.16524
-0.53011	-0.16596
-0.52884	-0.1666
-0.52757	-0.16705
-0.52631	-0.16747
-0.52504	-0.16718
-0.52377	-0.16686
-0.52251	-0.16818
-0.52124	-0.16785
-0.51997	-0.16782
-0.5187	-0.16809
-0.51744	-0.16824
-0.51617	-0.16958
-0.5149	-0.16984
-0.51364	-0.16951
-0.51237	-0.16917
-0.5111	-0.16935
-0.50984	-0.16931
-0.50857	-0.16882
-0.5073	-0.16782
-0.50604	-0.16678
-0.50477	-0.16663
-0.5035	-0.167
-0.50224	-0.16776
-0.50097	-0.16892
-0.4997	-0.1701
-0.49844	-0.17051
-0.49717	-0.17027
-0.4959	-0.16992
-0.49464	-0.17019
-0.49337	-0.17074
-0.4921	-0.1712
-0.49084	-0.1712
-0.48957	-0.17054
-0.4883	-0.16978
-0.48704	-0.16902
-0.48577	-0.16836
-0.4845	-0.16807
-0.48324	-0.16946
-0.48197	-0.1702
-0.4807	-0.16998
-0.47944	-0.17114
-0.47817	-0.17121
-0.4769	-0.1714
-0.47564	-0.17137
-0.47437	-0.16988
-0.4731	-0.17019
-0.47183	-0.17051
-0.47057	-0.17076
-0.4693	-0.1712
-0.46803	-0.17156
-0.46677	-0.17244
-0.4655	-0.17341
-0.46423	-0.17262
-0.46297	-0.17313
-0.4617	-0.17285
-0.46043	-0.17197
-0.45917	-0.17138
-0.4579	-0.17033
-0.45663	-0.16989
-0.45537	-0.16972
-0.4541	-0.16934
-0.45283	-0.16839
-0.45157	-0.16745
-0.4503	-0.16685
-0.44903	-0.16683
-0.44777	-0.16746
-0.4465	-0.16778
-0.44523	-0.16808
-0.44397	-0.1685
-0.4427	-0.16919
-0.44143	-0.1678
-0.44017	-0.16741
-0.4389	-0.1678
-0.43763	-0.16709
-0.43637	-0.16633
-0.4351	-0.16561
-0.43383	-0.16512
-0.43257	-0.16514
-0.4313	-0.16531
-0.43003	-0.16585
-0.42876	-0.16598
-0.4275	-0.16513
-0.42623	-0.16449
-0.42496	-0.16323
-0.4237	-0.16295
-0.42243	-0.16383
-0.42116	-0.16285
-0.4199	-0.16279
-0.41863	-0.16326
-0.41736	-0.16415
-0.4161	-0.16506
-0.41483	-0.16497
-0.41356	-0.16503
-0.4123	-0.16594
-0.41103	-0.16718
-0.40976	-0.16841
-0.4085	-0.16921
-0.40723	-0.16943
-0.40596	-0.1692
-0.4047	-0.16884
-0.40343	-0.16914
-0.40216	-0.16958
-0.4009	-0.16863
-0.39963	-0.16978
-0.39836	-0.17005
-0.3971	-0.16974
-0.39583	-0.1696
-0.39456	-0.16981
-0.3933	-0.17076
-0.39203	-0.17193
-0.39076	-0.17283
-0.3895	-0.17218
-0.38823	-0.17132
-0.38696	-0.17087
-0.3857	-0.1712
-0.38443	-0.17254
-0.38316	-0.1734
-0.38189	-0.17342
-0.38063	-0.17293
-0.37936	-0.17322
-0.37809	-0.1742
-0.37683	-0.17435
-0.37556	-0.17383
-0.37429	-0.17335
-0.37303	-0.17308
-0.37176	-0.17248
-0.37049	-0.17194
-0.36923	-0.17189
-0.36796	-0.17153
-0.36669	-0.17198
-0.36543	-0.17273
-0.36416	-0.17339
-0.36289	-0.17354
-0.36163	-0.17316
-0.36036	-0.17278
-0.35909	-0.17312
-0.35783	-0.17286
-0.35656	-0.17291
-0.35529	-0.17321
-0.35403	-0.1737
-0.35276	-0.17422
-0.35149	-0.17475
-0.35023	-0.1749
-0.34896	-0.17458
-0.34769	-0.1746
-0.34643	-0.17502
-0.34516	-0.1752
-0.34389	-0.17484
-0.34263	-0.17365
-0.34136	-0.17313
-0.34009	-0.17308
-0.33883	-0.17287
-0.33756	-0.17139
-0.33629	-0.17023
-0.33502	-0.16934
-0.33376	-0.16913
-0.33249	-0.17
-0.33122	-0.17028
-0.32996	-0.17097
-0.32869	-0.17178
-0.32742	-0.17243
-0.32616	-0.17207
-0.32489	-0.17169
-0.32362	-0.17162
-0.32236	-0.17184
-0.32109	-0.17173
-0.31982	-0.17122
-0.31856	-0.17107
-0.31729	-0.17134
-0.31602	-0.17185
-0.31476	-0.17196
-0.31349	-0.17158
-0.31222	-0.17106
-0.31096	-0.17095
-0.30969	-0.17079
-0.30842	-0.17063
-0.30716	-0.17066
-0.30589	-0.17149
-0.30462	-0.17181
-0.30336	-0.17146
-0.30209	-0.17088
-0.30082	-0.1709
-0.29956	-0.17005
-0.29829	-0.16996
-0.29702	-0.1706
-0.29576	-0.17181
-0.29449	-0.17253
-0.29322	-0.17351
-0.29195	-0.17383
-0.29069	-0.17313
-0.28942	-0.17374
-0.28815	-0.17399
-0.28689	-0.1736
-0.28562	-0.17279
-0.28435	-0.17307
-0.28309	-0.17275
-0.28182	-0.1719
-0.28055	-0.17107
-0.27929	-0.17161
-0.27802	-0.17175
-0.27675	-0.17151
-0.27549	-0.17096
-0.27422	-0.17027
-0.27295	-0.16992
-0.27169	-0.17101
-0.27042	-0.17226
-0.26915	-0.17256
-0.26789	-0.17213
-0.26662	-0.17285
-0.26535	-0.17358
-0.26409	-0.17369
-0.26282	-0.17315
-0.26155	-0.17388
-0.26029	-0.17433
-0.25902	-0.1745
-0.25775	-0.1765
-0.25649	-0.17668
-0.25522	-0.17631
-0.25395	-0.17633
-0.25269	-0.17673
-0.25142	-0.1766
-0.25015	-0.17674
-0.24888	-0.17716
-0.24762	-0.17637
-0.24635	-0.17603
-0.24508	-0.17535
-0.24382	-0.17453
-0.24255	-0.17455
-0.24128	-0.17486
-0.24002	-0.17518
-0.23875	-0.17543
-0.23748	-0.17556
-0.23622	-0.17681
-0.23495	-0.1774
-0.23368	-0.17744
-0.23242	-0.17709
-0.23115	-0.17644
-0.22988	-0.17526
-0.22862	-0.17455
-0.22735	-0.17468
-0.22608	-0.17433
-0.22482	-0.17429
-0.22355	-0.17412
-0.22228	-0.17407
-0.22102	-0.17539
-0.21975	-0.17572
-0.21848	-0.1759
-0.21722	-0.17609
-0.21595	-0.17634
-0.21468	-0.17709
-0.21342	-0.17773
-0.21215	-0.17759
-0.21088	-0.17605
-0.20962	-0.17621
-0.20835	-0.17661
-0.20708	-0.17718
-0.20582	-0.17784
-0.20455	-0.17727
-0.20328	-0.17744
-0.20201	-0.17823
-0.20075	-0.17929
-0.19948	-0.17887
-0.19821	-0.17902
-0.19695	-0.17924
-0.19568	-0.17906
-0.19441	-0.17812
-0.19315	-0.1779
-0.19188	-0.17819
-0.19061	-0.17885
-0.18935	-0.17979
-0.18808	-0.17942
-0.18681	-0.17886
-0.18555	-0.17859
-0.18428	-0.17902
-0.18301	-0.17841
-0.18175	-0.17773
-0.18048	-0.17707
-0.17921	-0.17639
-0.17795	-0.17632
-0.17668	-0.17633
-0.17541	-0.1761
-0.17415	-0.17536
-0.17288	-0.17504
-0.17161	-0.1745
-0.17035	-0.17447
-0.16908	-0.17517
-0.16781	-0.17427
-0.16655	-0.17289
-0.16528	-0.17185
-0.16401	-0.1715
-0.16275	-0.17199
-0.16148	-0.1718
-0.16021	-0.17088
-0.15895	-0.16982
-0.15768	-0.17001
-0.15641	-0.17016
-0.15514	-0.1708
-0.15388	-0.17137
-0.15261	-0.17103
-0.15134	-0.17097
-0.15008	-0.17049
-0.14881	-0.16981
-0.14754	-0.17005
-0.14628	-0.17058
-0.14501	-0.17073
-0.14374	-0.17047
-0.14248	-0.16993
-0.14121	-0.17041
-0.13994	-0.17124
-0.13868	-0.17155
-0.13741	-0.17042
-0.13614	-0.16993
-0.13488	-0.17083
-0.13361	-0.17187
-0.13234	-0.17229
-0.13108	-0.17325
-0.12981	-0.17398
-0.12854	-0.17424
-0.12728	-0.17426
-0.12601	-0.17551
-0.12474	-0.17601
-0.12348	-0.17688
-0.12221	-0.17773
-0.12094	-0.17705
-0.11968	-0.17783
-0.11841	-0.1793
-0.11714	-0.18057
-0.11588	-0.18058
-0.11461	-0.18065
-0.11334	-0.18018
-0.11207	-0.17968
-0.11081	-0.17958
-0.10954	-0.17993
-0.10827	-0.17996
-0.10701	-0.17953
-0.10574	-0.1789
-0.10447	-0.18001
-0.10321	-0.18107
-0.10194	-0.18172
-0.10067	-0.18164
-0.09941	-0.18029
-0.09814	-0.18022
-0.09687	-0.18064
-0.09561	-0.18147
-0.09434	-0.18274
-0.09307	-0.18161
-0.09181	-0.18087
-0.09054	-0.18117
-0.08927	-0.18048
-0.08801	-0.18014
-0.08674	-0.17985
-0.08547	-0.1794
-0.08421	-0.1784
-0.08294	-0.17916
-0.08167	-0.17886
-0.08041	-0.17823
-0.07914	-0.17874
-0.07787	-0.17879
-0.07661	-0.17774
-0.07534	-0.17664
-0.07407	-0.1763
-0.07281	-0.17566
-0.07154	-0.17525
-0.07027	-0.17522
-0.06901	-0.17545
-0.06774	-0.17478
-0.06647	-0.17528
-0.0652	-0.1767
-0.06394	-0.17799
-0.06267	-0.17625
-0.0614	-0.17538
-0.06014	-0.17535
-0.05887	-0.17579
-0.0576	-0.17606
-0.05634	-0.17528
-0.05507	-0.17529
-0.0538	-0.17539
-0.05254	-0.17478
-0.05127	-0.17545
-0.05	-0.17565
-0.04874	-0.17612
-0.04747	-0.1771
-0.0462	-0.17688
-0.04494	-0.17764
-0.04367	-0.17868
-0.0424	-0.17954
-0.04114	-0.17888
-0.03987	-0.17861
-0.0386	-0.17862
-0.03734	-0.17874
-0.03607	-0.17836
-0.0348	-0.17828
-0.03354	-0.17832
-0.03227	-0.17849
-0.031	-0.17927
-0.02974	-0.18016
-0.02847	-0.18076
-0.0272	-0.18109
-0.02594	-0.18148
-0.02467	-0.18189
-0.0234	-0.18143
-0.02214	-0.18082
-0.02087	-0.1816
-0.0196	-0.18126
-0.01833	-0.18006
-0.01707	-0.17907
-0.0158	-0.17943
-0.01453	-0.1796
-0.01327	-0.08144
-0.012	0.000617
-0.01073	0.000288
-0.00947	-0.00069
-0.0082	0.000631
-0.00693	0.001623
-0.00567	0.001109
-0.0044	0.001907
-0.00313	0.003621
-0.00187	0.003698
-0.0006	0.005289
0.000667	0.007681
0.001934	0.007212
0.003201	0.007111
0.004467	0.008438
0.005734	0.008873
0.007001	0.010676
0.008268	0.011253
0.009535	0.011136
0.010801	0.012126
0.012068	0.012997
0.013335	0.014447
0.014602	0.01442
0.015868	0.014163
0.017135	0.014366
0.018402	0.01435
0.019669	0.01434
0.020936	0.015145
0.022202	0.016152
0.023469	0.015272
0.024736	0.015311
0.026002	0.015656
0.027269	0.017073
0.028536	0.018109
0.029803	0.018054
0.03107	0.018258
0.032336	0.019196
0.033603	0.018368
0.03487	0.017353
0.036137	0.017308
0.037403	0.016743
0.03867	0.016293
0.039937	0.01749
0.041203	0.017409
0.04247	0.017599
0.043737	0.017762
0.045004	0.017057
0.046271	0.016612
0.047537	0.016383
0.048804	0.015363
0.050071	0.015025
0.051338	0.014958
0.052604	0.01412
0.053871	0.013605
0.055138	0.012554
0.056405	0.012144
0.057672	0.011391
0.058938	0.010803
0.060205	0.010517
0.061472	0.010933
0.062738	0.010307
0.064005	0.009765
0.065272	0.010842
0.066539	0.010237
0.067806	0.009261
0.069072	0.01052
0.070339	0.010276
0.071606	0.00992
0.072873	0.009818
0.074139	0.009299
0.075406	0.009305
0.076673	0.010116
0.07794	0.010193
0.079206	0.011032
0.080473	0.011307
0.08174	0.011525
0.083007	0.011527
0.084273	0.011538
0.08554	0.01131
0.086807	0.012372
0.088074	0.012471
0.08934	0.013232
0.090607	0.013121
0.091874	0.013015
0.093141	0.011612
0.094408	0.011252
0.095674	0.010664
0.096941	0.010022
0.098208	0.010937
0.099475	0.011453
0.100741	0.010688
0.102008	0.010405
0.103275	0.010009
0.104542	0.010021
0.105808	0.010736
0.107075	0.01008
0.108342	0.009836
0.109609	0.008553
0.110875	0.008305
0.112142	0.00836
0.113409	0.008101
0.114676	0.008345
0.115942	0.009857
0.117209	0.010698
0.118476	0.01045
0.119743	0.010506
0.12101	0.010631
0.122276	0.011756
0.123543	0.011886
0.12481	0.011929
[truncated: 31,751 more rows]

## Sheet: YFP
Days of expression	Fluorescence intensity (RFU)
1	40320
2	98675
3	99767
4	100000
5	100000

## Sheet: Insect cell viability
Days of expression	% Cell viability
1	100
5	75
