# Supplementary material for: Purified zymogens reveal mechanisms of snake venom metalloproteinase auto-activation
Source: eLife. 2026 Jun 10;15:RP109112. doi: 10.7554/eLife.109112 (PMC13252954; doi:10.7554/eLife.109112)
Supplement: Figure 3—source data 4. [file elife-109112-fig3-data4.xlsx]

## Sheet: IMAC
Volume (mL)	Abs 280 nm (mAU)	Volume (mL)	%B
0	29.5384	0.0416	0
0.00832	42.4392	0.0832	0
0.01664	42.7637	0.1248	0
0.02496	43.8573	0.1664	0
0.033279	48.2355	0.208	0
0.041599	53.4076	0.2496	0
0.049919	58.7066	0.2912	0
0.058239	64.3565	0.3328	0
0.066559	70.8103	0.3744	0
0.074879	77.5819	0.416	0
0.083199	84.5882	0.4576	0
0.091518	91.8042	0.4992	0
0.099838	99.1433	0.5408	0
0.108158	106.636	0.5824	0
0.116478	114.362	0.624	0
0.124798	122.16	0.6656	0
0.133118	127.582	0.7072	0
0.141438	131.293	0.7488	0
0.149757	134.644	0.7904	0
0.158077	137.993	0.832	0
0.166397	140.803	0.8736	0
0.174717	143.097	0.9152	0
0.183037	145.135	0.9568	0
0.191357	146.942	0.9984	0
0.199677	148.635	1.04	0
0.207997	150.21	1.0816	0
0.216316	151.61	1.1232	0
0.224636	152.772	1.1648	0
0.232956	153.781	1.2064	0
0.241276	154.752	1.248	0
0.249596	155.76	1.2896	0
0.257916	156.822	1.3312	0
0.266236	157.965	1.3728	0
0.274555	159.231	1.4144	0
0.282875	160.603	1.456	0
0.291195	162.065	1.4976	0
0.299515	163.6	1.5392	0
0.307835	165.215	1.5808	0
0.316155	166.874	1.6224	0
0.324475	168.542	1.664	0
0.332794	170.166	1.7056	0
0.341114	171.742	1.7472	0
0.349434	173.212	1.7888	0
0.357754	174.529	1.8304	0
0.366074	175.641	1.872	0
0.374394	176.538	1.9136	0
0.382714	177.228	1.9552	0
0.391033	177.748	1.9968	0
0.399353	178.097	2.0384	0
0.407673	178.319	2.08	0
0.415993	178.431	2.1216	0
0.424313	178.439	2.1632	0
0.432633	178.394	2.2048	0
0.440953	178.326	2.2464	0
0.449272	178.207	2.288	0
0.457592	178.044	2.3296	0
0.465912	177.852	2.3712	0
0.474232	177.66	2.4128	0
0.482552	177.474	2.4544	0
0.490872	177.292	2.496	0
0.499192	177.112	2.5376	0
0.507511	176.95	2.5792	0
0.515831	176.789	2.6208	0
0.524151	176.625	2.6624	0
0.532471	176.491	2.704	0
0.540791	176.371	2.7456	0
0.549111	176.26	2.7872	0
0.557431	176.171	2.8288	0
0.56575	176.1	2.8704	0
0.57407	176.025	2.912	0
0.58239	175.959	2.9536	0
0.59071	175.909	2.9952	0
0.59903	175.869	3.0368	0
0.60735	175.853	3.0784	0
0.61567	175.859	3.12	0
0.62399	175.883	3.1616	0
0.632309	175.917	3.2032	0
0.640629	175.974	3.2448	0
0.648949	176.04	3.2864	0
0.657269	176.128	3.328	0
0.665589	176.246	3.3696	0
0.673909	176.379	3.4112	0
0.682229	176.556	3.4528	0
0.690548	176.756	3.4944	0
0.698868	176.989	3.536	0
0.707188	177.243	3.5776	0
0.715508	177.527	3.6192	0
0.723828	177.833	3.6608	0
0.732148	178.185	3.7024	0
0.740468	178.58	3.744	0
0.748787	179.011	3.7856	0
0.757107	179.49	3.8272	0
0.765427	180	3.8688	0
0.773747	180.563	3.9104	0
0.782067	181.171	3.952	0
0.790387	181.826	3.9936	0
0.798707	182.519	4.0352	0
0.807026	183.282	4.0768	0
0.815346	184.088	4.1184	0
0.823666	184.958	4.16	0
0.831986	185.875	4.2016	0
0.840306	186.847	4.2432	0
0.848626	187.887	4.2848	0
0.856946	188.989	4.3264	0
0.865265	190.141	4.368	0
0.873585	191.358	4.4096	0
0.881905	192.622	4.4512	0
0.890225	193.956	4.4928	0
0.898545	195.372	4.5344	0
0.906865	196.824	4.576	0
0.915185	198.326	4.6176	0
0.923504	199.872	4.6592	0
0.931824	201.474	4.7008	0
0.940144	203.102	4.7424	0
0.948464	204.78	4.784	0
0.956784	206.492	4.8256	0
0.965104	208.23	4.8672	0
0.973424	210.004	4.9088	0
0.981744	211.78	4.9504	0
0.990063	213.56	4.992	0
0.998383	215.348	5.0336	0
1.0067	217.125	5.0752	0
1.01502	218.897	5.1168	0
1.02334	220.659	5.1584	0.312845
1.03166	222.391	5.2	0.5
1.03998	224.095	5.2416	0.5
1.0483	225.756	5.2832	0.5
1.05662	227.377	5.3248	0.5
1.06494	228.925	5.3664	0.5
1.07326	230.443	5.408	0.5
1.08158	231.895	5.4496	0.5
1.0899	233.268	5.4912	0.5
1.09822	234.569	5.5328	0.5
1.10654	235.804	5.5744	0.5
1.11486	236.953	5.616	0.5
1.12318	238.018	5.6576	0.5
1.1315	239.003	5.6992	0.5
1.13982	239.892	5.7408	0.5
1.14814	240.696	5.7824	0.5
1.15646	241.41	5.824	0.5
1.16478	242.037	5.8656	0.5
1.1731	242.549	5.9072	0.5
1.18142	242.971	5.9488	0.5
1.18974	243.304	5.9904	0.5
1.19806	243.546	6.032	0.5
1.20638	243.675	6.0736	0.5
1.2147	243.714	6.1152	0.5
1.22302	243.666	6.1568	0.5
1.23134	243.539	6.1984	0.5
1.23966	243.324	6.24	0.5
1.24798	243.011	6.2816	0.5
1.2563	242.609	6.3232	0.5
1.26462	242.121	6.3648	0.5
1.27294	241.541	6.4064	0.5
1.28126	240.869	6.448	0.5
1.28958	240.121	6.4896	0.5
1.2979	239.284	6.5312	0.5
1.30622	238.365	6.5728	0.5
1.31454	237.4	6.6144	0.5
1.32286	236.348	6.656	0.5
1.33118	235.203	6.6976	0.5
1.3395	233.999	6.7392	0.5
1.34782	232.73	6.7808	0.5
1.35614	231.393	6.8224	0.5
1.36446	230.016	6.864	0.5
1.37278	228.583	6.9056	0.5
1.3811	227.088	6.9472	0.5
1.38942	225.539	6.9888	0.5
1.39774	223.928	7.0304	0.5
1.40606	222.267	7.072	0.5
1.41438	220.56	7.1136	0.5
1.4227	218.815	7.1552	0.5
1.43102	217.017	7.1968	0.5
1.43934	215.163	7.2384	0.5
1.44766	213.274	7.28	0.5
1.45598	211.348	7.3216	0.5
1.46429	209.396	7.3632	0.5
1.47262	207.41	7.4048	0.5
1.48093	205.387	7.4464	0.5
1.48925	203.332	7.488	0.5
1.49758	201.259	7.5296	0.5
1.50589	199.153	7.5712	0.5
1.51422	197.035	7.6128	0.5
1.52253	194.916	7.6544	0.5
1.53085	192.775	7.696	0.5
1.53917	190.626	7.7376	0.5
1.54749	188.479	7.7792	0.5
1.55581	186.327	7.8208	0.5
1.56413	184.165	7.8624	0.5
1.57245	182.01	7.904	0.5
1.58077	179.886	7.9456	0.5
1.58909	177.755	7.9872	0.5
1.59741	175.626	8.0288	0.5
1.60573	173.507	8.0704	0.5
1.61405	171.402	8.112	0.5
1.62237	169.305	8.1536	0.5
1.63069	167.236	8.1952	0.5
1.63901	165.179	8.2368	0.5
1.64733	163.133	8.2784	0.5
1.65565	161.109	8.32	0.5
1.66397	159.111	8.3616	0.5
1.67229	157.121	8.4032	0.5
1.68061	155.144	8.4448	0.5
1.68893	153.197	8.4864	0.5
1.69725	151.28	8.528	0.5
1.70557	149.398	8.5696	0.5
1.71389	147.533	8.6112	0.5
1.72221	145.705	8.6528	0.5
1.73053	143.891	8.6944	0.5
1.73885	142.123	8.736	0.5
1.74717	140.357	8.7776	0.5
1.75549	138.632	8.8192	0.5
1.76381	136.922	8.8608	0.5
1.77213	135.244	8.9024	0.5
1.78045	133.589	8.944	0.5
1.78877	131.965	8.9856	0.5
1.79709	130.379	9.0272	0.5
1.80541	128.814	9.0688	0.5
1.81373	127.273	9.1104	0.5
1.82205	125.763	9.152	0.5
1.83037	124.273	9.1936	0.5
1.83869	122.822	9.2352	0.5
1.84701	121.423	9.2768	0.5
1.85533	120.027	9.3184	0.5
1.86365	118.664	9.36	0.5
1.87197	117.335	9.4016	0.5
1.88029	116.037	9.4432	0.5
1.88861	114.763	9.4848	0.5
1.89693	113.529	9.5264	0.5
1.90525	112.315	9.568	0.5
1.91357	111.129	9.6096	0.5
1.92189	109.98	9.6512	0.5
1.93021	108.862	9.6928	0.5
1.93853	107.773	9.7344	0.5
1.94685	106.71	9.776	0.5
1.95517	105.693	9.8176	0.5
1.96349	104.689	9.8592	0.5
1.97181	103.706	9.9008	0.5
1.98013	102.742	9.9424	0.5
1.98845	101.811	9.984	0.5
1.99677	100.909	10.0256	0.5
2.00509	100.035	10.0672	0.5
2.01341	99.1687	10.1088	0.5
2.02173	98.3187	10.1504	0.5
2.03005	97.4972	10.192	0.5
2.03837	96.7017	10.2336	0.5
2.04669	95.9191	10.2752	0.5
2.05501	95.1502	10.3168	0.5
2.06332	94.4158	10.3584	0.5
2.07165	93.6928	10.4	0.5
2.07997	92.989	10.4416	0.5
2.08828	92.3121	10.4832	0.5
2.0966	91.6486	10.5248	0.5
2.10493	90.9966	10.5664	0.5
2.11325	90.3706	10.608	0.5
2.12156	89.7623	10.6496	0.5
2.12988	89.1689	10.6912	0.5
2.1382	88.5902	10.7328	0.5
2.14652	88.0308	10.7744	0.5
2.15484	87.4834	10.816	0.5
2.16316	86.9613	10.8576	0.5
2.17148	86.4524	10.8992	0.5
2.1798	85.9433	10.9408	0.5
2.18812	85.4477	10.9824	0.5
2.19644	84.9738	11.024	0.5
2.20476	84.5098	11.0656	0.5
2.21308	84.0659	11.1072	0.5
2.2214	83.6333	11.1488	0.5
2.22972	83.2176	11.1904	0.5
2.23804	82.8133	11.232	0.5
2.24636	82.4145	11.2736	0.5
2.25468	82.029	11.3152	0.5
2.263	81.6493	11.3568	0.5
2.27132	81.2839	11.3984	0.5
2.27964	80.9291	11.44	0.5
2.28796	80.5863	11.4816	0.5
2.29628	80.2533	11.5232	0.5
2.3046	79.9213	11.5648	0.5
2.31292	79.5936	11.6064	0.5
2.32124	79.2787	11.648	0.5
2.32956	78.9761	11.6896	0.5
2.33788	78.677	11.7312	0.5
2.3462	78.3834	11.7728	0.5
2.35452	78.1113	11.8144	0.5
2.36284	77.8449	11.856	0.5
2.37116	77.582	11.8976	0.5
2.37948	77.3277	11.9392	0.5
2.3878	77.0771	11.9808	0.5
2.39612	76.8278	12.0224	0.5
2.40444	76.5899	12.064	0.5
2.41276	76.3612	12.1056	0.5
2.42108	76.14	12.1472	0.5
2.4294	75.9173	12.1888	0.5
2.43772	75.7011	12.2304	0.5
2.44604	75.4938	12.272	0.5
2.45436	75.2903	12.3136	0.5
2.46268	75.0851	12.3552	0.5
2.471	74.883	12.3968	0.5
2.47932	74.69	12.4384	0.5
2.48764	74.513	12.48	0.5
2.49596	74.3293	12.5216	0.5
2.50428	74.1479	12.5632	0.5
2.5126	73.9696	12.6048	0.5
2.52092	73.7975	12.6464	0.5
2.52924	73.6293	12.688	0.5
2.53756	73.4655	12.7296	0.5
2.54588	73.3012	12.7712	0.5
2.5542	73.1424	12.8128	0.5
2.56252	72.9906	12.8544	0.5
2.57084	72.8428	12.896	0.5
2.57916	72.6954	12.9376	0.5
2.58748	72.5489	12.9792	0.5
2.5958	72.4079	13.0208	0.5
2.60412	72.2693	13.0624	0.5
2.61244	72.1387	13.104	0.5
2.62076	72.0082	13.1456	0.5
2.62908	71.8781	13.1872	0.5
2.6374	71.7494	13.2288	0.5
2.64572	71.6211	13.2704	0.5
2.65403	71.4985	13.312	0.5
2.66235	71.3723	13.3536	0.5
2.67068	71.2472	13.3952	0.5
2.679	71.1278	13.4368	0.5
2.68731	71.0135	13.4784	0.5
2.69563	70.8992	13.52	0.5
2.70396	70.7858	13.5616	0.5
2.71227	70.6703	13.6032	0.5
2.72059	70.5639	13.6448	0.5
2.72891	70.457	13.6864	0.5
2.73723	70.3527	13.728	0.5
2.74555	70.2545	13.7696	0.5
2.75387	70.1594	13.8112	0.5
2.76219	70.0623	13.8528	0.5
2.77051	69.9653	13.8944	0.5
2.77883	69.8693	13.936	0.5
2.78715	69.7729	13.9776	0.5
2.79547	69.6788	14.0192	0.5
2.80379	69.5898	14.0608	0.5
2.81211	69.5026	14.1024	0.5
2.82043	69.4135	14.144	0.5
2.82875	69.3195	14.1856	0.5
2.83707	69.2323	14.2272	0.5
2.84539	69.1434	14.2688	0.5
2.85371	69.06	14.3104	0.5
2.86203	68.984	14.352	0.5
2.87035	68.9063	14.3936	0.5
2.87867	68.8271	14.4352	0.5
2.88699	68.7506	14.4768	0.5
2.89531	68.6764	14.5184	0.5
2.90363	68.5988	14.56	0.5
2.91195	68.5216	14.6016	0.5
2.92027	68.4484	14.6432	0.5
2.92859	68.3744	14.6848	0.5
2.93691	68.3031	14.7264	0.5
2.94523	68.2349	14.768	0.5
2.95355	68.1637	14.8096	0.5
2.96187	68.0931	14.8512	0.5
2.97019	68.0225	14.8928	0.5
2.97851	67.9583	14.9344	0.5
2.98683	67.8932	14.976	0.5
2.99515	67.8248	15.0176	0.5
3.00347	67.7584	15.0592	0.5
3.01179	67.6947	15.1008	0.5
3.02011	67.6319	15.1424	0.5
3.02843	67.5698	15.184	0.5
3.03675	67.5076	15.2256	0.5
3.04507	67.4468	15.2672	0.5
3.05339	67.3887	15.3088	0.5
3.06171	67.3295	15.3504	0.5
3.07003	67.2745	15.392	0.5
3.07835	67.2148	15.4336	0.5
3.08667	67.1561	15.4752	0.5
3.09499	67.1061	15.5168	0.5
3.10331	67.055	15.5584	0.5
3.11163	67.0053	15.6	0.5
3.11995	66.9578	15.6416	0.5
3.12827	66.9143	15.6832	0.5
3.13659	66.8708	15.7248	0.5
3.14491	66.8258	15.7664	0.5
3.15323	66.7763	15.808	0.5
3.16155	66.728	15.8496	0.5
3.16987	66.6788	15.8912	0.5
3.17819	66.6347	15.9328	0.5
3.18651	66.5935	15.9744	0.5
3.19483	66.5464	16.016	0.5
3.20315	66.5034	16.0576	0.5
3.21147	66.4621	16.0992	0.5
3.21979	66.4199	16.1408	0.5
3.22811	66.3767	16.1824	0.5
3.23643	66.3355	16.224	0.5
3.24474	66.3018	16.2656	0.5
3.25306	66.274	16.3072	0.5
3.26139	66.2458	16.3488	0.5
3.26971	66.216	16.3904	0.5
3.27802	66.1873	16.432	0.5
3.28634	66.1601	16.4736	0.5
3.29467	66.1312	16.5152	0.5
3.30298	66.1027	16.5568	0.5
3.3113	66.0756	16.5984	0.5
3.31962	66.0515	16.64	0.5
3.32794	66.0265	16.6816	0.5
3.33626	66.0046	16.7232	0.5
3.34458	65.9791	16.7648	0.5
3.3529	65.9478	16.8064	0.5
3.36122	65.9204	16.848	0.5
3.36954	65.8971	16.8896	0.5
3.37786	65.8729	16.9312	0.5
3.38618	65.8502	16.9728	0.5
3.3945	65.8276	17.0144	0.5
3.40282	65.8071	17.056	0.5
3.41114	65.7881	17.0976	0.5
3.41946	65.769	17.1392	0.5
3.42778	65.7553	17.1808	0.5
3.4361	65.7414	17.2224	0.5
3.44442	65.7239	17.264	0.5
3.45274	65.706	17.3056	0.5
3.46106	65.6926	17.3472	0.5
3.46938	65.6801	17.3888	0.5
3.4777	65.6642	17.4304	0.5
3.48602	65.6533	17.472	0.5
3.49434	65.6436	17.5136	0.5
3.50266	65.6356	17.5552	0.5
3.51098	65.6267	17.5968	0.5
3.5193	65.6147	17.6384	0.5
3.52762	65.6041	17.68	0.5
3.53594	65.5911	17.7216	0.5
3.54426	65.5763	17.7632	0.5
3.55258	65.5643	17.8048	0.5
3.5609	65.5571	17.8464	0.5
3.56922	65.5487	17.888	0.5
3.57754	65.5419	17.9296	0.5
3.58586	65.5344	17.9712	0.5
3.59418	65.523	18.0128	0.5
3.6025	65.5139	18.0544	0.5
3.61082	65.5027	18.096	0.5
3.61914	65.4963	18.1376	0.5
3.62746	65.4916	18.1792	0.5
3.63578	65.4898	18.2208	0.5
3.6441	65.4858	18.2624	0.5
3.65242	65.4837	18.304	0.5
3.66074	65.4822	18.3456	0.5
3.66906	65.4787	18.3872	0.5
3.67738	65.4756	18.4288	0.5
3.6857	65.4739	18.4704	0.5
3.69402	65.4756	18.512	0.5
3.70234	65.4792	18.5536	0.5
3.71066	65.4825	18.5952	0.5
3.71898	65.4875	18.6368	0.5
3.7273	65.4911	18.6784	0.5
3.73562	65.4935	18.72	0.5
3.74394	65.5	18.7616	0.5
3.75226	65.5081	18.8032	0.5
3.76058	65.5146	18.8448	0.5
3.7689	65.5216	18.8864	0.5
3.77722	65.5258	18.928	0.5
3.78554	65.5251	18.9696	0.5
3.79386	65.5281	19.0112	0.5
3.80218	65.531	19.0528	0.5
3.8105	65.5367	19.0944	0.5
3.81882	65.547	19.136	0.5
3.82714	65.5572	19.1776	0.5
3.83546	65.5642	19.2192	0.5
3.84378	65.5672	19.2608	0.5
3.85209	65.5724	19.3024	0.5
3.86042	65.5788	19.344	0.5
3.86874	65.5848	19.3856	0.5
3.87705	65.5937	19.4272	0.5
3.88537	65.6076	19.4688	0.5
3.8937	65.6227	19.5104	0.5
3.90201	65.6353	19.552	0.5
3.91033	65.6443	19.5936	0.5
3.91865	65.6488	19.6352	0.5
3.92697	65.652	19.6768	0.5
3.93529	65.6611	19.7184	0.5
3.94361	65.6705	19.76	0.5
3.95193	65.685	19.8016	0.5
3.96025	65.7001	19.8432	0.5
3.96857	65.7116	19.8848	0.5
3.97689	65.7215	19.9264	0.5
3.98521	65.7305	19.968	0.5
3.99353	65.7374	20.0096	0.5
4.00185	65.745	20.0512	0.5
4.01017	65.7567	20.0928	0.5
4.01849	65.7665	20.1344	0.5
4.02681	65.7765	20.176	0.5
4.03513	65.7837	20.2176	0.5
4.04345	65.7865	20.2592	0.5
4.05177	65.7885	20.3008	0.5
4.06009	65.7909	20.3424	0.5
4.06841	65.7952	20.384	0.5
4.07673	65.8031	20.4256	0.5
4.08505	65.8117	20.4672	0.5
4.09337	65.8173	20.5088	0.5
4.10169	65.8228	20.5504	0.5
4.11001	65.825	20.592	0.5
4.11833	65.8299	20.6336	0.5
4.12665	65.8406	20.6752	0.5
4.13497	65.8499	20.7168	0.5
4.14329	65.8583	20.7584	0.5
4.15161	65.8688	20.8	0.5
4.15993	65.8806	20.8416	0.5
4.16825	65.8896	20.8832	0.5
4.17657	65.8961	20.9248	0.5
4.18489	65.9035	20.9664	0.5
4.19321	65.9096	21.008	0.5
4.20153	65.9162	21.0496	0.5
4.20985	65.9272	21.0912	0.5
4.21817	65.9398	21.1328	0.5
4.22649	65.9497	21.1744	0.5
4.23481	65.9592	21.216	0.5
4.24313	65.9689	21.2576	0.5
4.25145	65.9817	21.2992	0.5
4.25977	65.9933	21.3408	0.5
4.26809	66.0011	21.3824	0.5
4.27641	66.011	21.424	0.5
4.28473	66.0199	21.4656	0.5
4.29305	66.0287	21.5072	0.5
4.30137	66.0399	21.5488	0.5
4.30969	66.0497	21.5904	0.5
4.31801	66.0539	21.632	0.5
4.32633	66.0523	21.6736	0.5
4.33465	66.0496	21.7152	0.5
4.34297	66.0452	21.7568	0.5
4.35129	66.0412	21.7984	0.5
4.35961	66.0358	21.84	0.5
4.36793	66.027	21.8816	0.5
4.37625	66.0177	21.9232	0.5
4.38457	66.0042	21.9648	0.5
4.39289	65.9871	22.0064	0.5
4.40121	65.9702	22.048	0.5
4.40953	65.9533	22.0896	0.5
4.41785	65.9322	22.1312	0.5
4.42617	65.9093	22.1728	0.5
4.43448	65.8873	22.2144	0.5
4.4428	65.867	22.256	0.5
4.45113	65.85	22.2976	0.5
4.45944	65.827	22.3392	0.5
4.46776	65.7985	22.3808	0.5
4.47609	65.771	22.4224	0.5
4.4844	65.7397	22.464	0.5
4.49272	65.7064	22.5056	0.5
4.50104	65.67	22.5472	0.5
4.50936	65.6278	22.5888	0.5
4.51768	65.5876	22.6304	0.5
4.526	65.5502	22.672	0.5
4.53432	65.5142	22.7136	0.5
4.54264	65.4734	22.7552	0.5
4.55096	65.4236	22.7968	0.5
4.55928	65.3732	22.8384	0.5
4.5676	65.3254	22.88	0.5
4.57592	65.2799	22.9216	0.5
4.58424	65.2368	22.9632	0.5
4.59256	65.192	23.0048	0.5
4.60088	65.1427	23.0464	0.5
4.6092	65.0897	23.088	0.5
4.61752	65.0337	23.1296	0.5
4.62584	64.9733	23.1712	0.5
4.63416	64.9082	23.2128	0.5
4.64248	64.8431	23.2544	0.5
4.6508	64.777	23.296	0.5
4.65912	64.7048	23.3376	0.5
4.66744	64.6304	23.3792	0.5
4.67576	64.5526	23.4208	0.5
4.68408	64.469	23.4624	0.5
4.6924	64.3847	23.504	0.5
4.70072	64.2999	23.5456	0.5
4.70904	64.2173	23.5872	0.5
4.71736	64.1359	23.6288	0.5
4.72568	64.0519	23.6704	0.5
4.734	63.9715	23.712	0.5
4.74232	63.8919	23.7536	0.5
4.75064	63.8098	23.7952	0.5
4.75896	63.73	23.8368	0.5
4.76728	63.6518	23.8784	0.5
4.7756	63.5673	23.92	0.5
4.78392	63.4779	23.9616	0.5
4.79224	63.3897	24.0032	0.5
4.80056	63.298	24.0448	0.5
4.80888	63.2001	24.0864	0.5
4.8172	63.1013	24.128	0.5
4.82552	63.0007	24.1696	0.5
4.83384	62.8949	24.2112	0.5
4.84216	62.7879	24.2528	0.5
4.85048	62.6812	24.2944	0.5
4.8588	62.5709	24.336	0.5
4.86712	62.4558	24.3776	0.5
4.87544	62.3443	24.4192	0.5
4.88376	62.2375	24.4608	0.5
4.89208	62.1269	24.5024	0.5
4.9004	62.009	24.544	0.5
4.90872	61.8937	24.5856	0.5
4.91704	61.7782	24.6272	0.5
4.92536	61.6567	24.6688	0.5
4.93368	61.5365	24.7104	0.5
4.942	61.4172	24.752	0.5
4.95032	61.2942	24.7936	0.5
4.95864	61.1669	24.8352	0.5
4.96696	61.0397	24.8768	0.5
4.97528	60.9119	24.9184	0.5
4.9836	60.7778	24.96	0.5
4.99192	60.6425	25.0016	0.5
5.00024	60.5089	25.0432	0.5
5.00856	60.3797	25.0848	0.5
5.01688	60.2486	25.1264	0.5
5.0252	60.1125	25.168	0.5
5.03352	59.9763	25.2096	0.5
5.04183	59.8408	25.2512	0.5
5.05016	59.6979	25.2928	0.5
5.05847	59.5533	25.3344	0.5
5.06679	59.4077	25.376	0.5
5.07512	59.2564	25.4176	0.5
5.08343	59.1031	25.4592	0.5
5.09175	58.951	25.5008	0.5
5.10007	58.7962	25.5424	0.5
5.10839	58.6414	25.584	0.5
5.11671	58.4848	25.6256	0.5
5.12503	58.3252	25.6672	0.5
5.13335	58.1651	25.7088	0.5
5.14167	57.4579	25.7504	0.5
5.14999	57.047	25.792	0.5
5.15831	56.8913	25.8336	0.5
5.16663	56.7948	25.8752	0.5
5.17495	56.7431	25.9168	0.5
5.18327	56.6884	25.9584	0.5
5.19159	56.6325	26	0.5
5.19991	56.5612	26.0416	0.5
5.20823	56.4462	26.0832	0.5
5.21655	56.3108	26.1248	0.5
5.22487	56.1623	26.1664	0.5
5.23319	56.03	26.208	0.5
5.24151	55.9438	26.2496	0.5
5.24983	55.885	26.2912	0.5
5.25815	55.8103	26.3328	0.5
5.26647	55.7065	26.3744	0.5
5.27479	55.5457	26.416	0.5
5.28311	55.3621	26.4576	0.5
5.29143	55.1235	26.4992	0.5
5.29975	54.8659	26.5408	0.5
5.30807	54.61	26.5824	0.5
5.31639	54.3971	26.624	0.5
5.32471	54.1694	26.6656	0.5
5.33303	53.9386	26.7072	0.5
5.34135	53.6824	26.7488	0.5
5.34967	53.4141	26.7904	0.5
5.35799	53.1516	26.832	0.5
5.36631	52.9056	26.8736	0.5
5.37463	52.6885	26.9152	0.5
5.38295	52.5133	26.9568	0.5
5.39127	52.4045	26.9984	0.5
5.39959	52.3741	27.04	0.5
5.40791	52.3919	27.0816	0.5
5.41623	52.4318	27.1232	0.5
5.42455	52.4889	27.1648	0.5
5.43287	52.5726	27.2064	0.5
5.44119	52.6734	27.248	0.5
5.44951	52.7619	27.2896	0.5
5.45783	52.8211	27.3312	0.5
5.46615	52.8553	27.3728	0.5
5.47447	52.8691	27.4144	0.5
5.48279	52.8472	27.456	0.5
5.49111	52.7844	27.4976	0.5
5.49943	52.6813	27.5392	0.5
5.50775	52.5464	27.5808	0.5
5.51607	52.3846	27.6224	0.5
5.52439	52.2046	27.664	0.5
5.53271	52.0083	27.7056	0.5
5.54103	51.7926	27.7472	0.5
5.54935	51.5537	27.7888	0.5
5.55767	51.3001	27.8304	0.5
5.56599	51.0363	27.872	0.5
5.57431	50.7736	27.9136	0.5
5.58263	50.5087	27.9552	0.5
5.59095	50.2491	27.9968	0.5
5.59927	49.9846	28.0384	0.5
5.60759	49.7184	28.08	0.5
5.61591	49.4576	28.1216	0.5
5.62423	49.2006	28.1632	0.5
5.63255	48.9441	28.2048	0.5
5.64086	48.6815	28.2464	0.5
5.64919	48.4241	28.288	0.5
5.6575	48.1686	28.3296	0.5
5.66582	47.9076	28.3712	0.5
5.67415	47.6444	28.4128	0.5
5.68246	47.3817	28.4544	0.5
5.69078	47.1248	28.496	0.5
5.6991	46.8777	28.5376	0.5
5.70742	46.6291	28.5792	0.5
5.71574	46.3805	28.6208	0.5
5.72406	46.1351	28.6624	0.5
5.73238	45.89	28.704	0.5
5.7407	45.6469	28.7456	0.5
5.74902	45.4071	28.7872	0.5
5.75734	45.1659	28.8288	0.5
5.76566	44.9319	28.8704	0.5
5.77398	44.7093	28.912	0.5
5.7823	44.4886	28.9536	0.5
5.79062	44.2588	28.9952	0.5
5.79894	44.0303	29.0368	0.5
5.80726	43.8124	29.0784	0.5
5.81558	43.5974	29.12	0.5
5.8239	43.3819	29.1616	0.5
5.83222	43.1688	29.2032	0.5
5.84054	42.9638	29.2448	0.5
5.84886	42.7562	29.2864	0.5
5.85718	42.5521	29.328	0.5
5.8655	42.3501	29.3696	0.5
5.87382	42.1463	29.4112	0.5
5.88214	41.9422	29.4528	0.5
5.89046	41.7456	29.4944	0.5
5.89878	41.5523	29.536	0.5
5.9071	41.3571	29.5776	0.5
5.91542	41.1646	29.6192	0.5
5.92374	40.9729	29.6608	0.5
5.93206	40.7805	29.7024	0.5
5.94038	40.5873	29.744	0.5
5.9487	40.3989	29.7856	0.5
5.95702	40.2125	29.8272	0.5
5.96534	40.0284	29.8688	0.5
5.97366	39.8459	29.9104	0.5
5.98198	39.6686	29.952	0.5
5.9903	39.4897	29.9936	0.5
5.99862	39.3086	30.0352	0.5
6.00694	39.134	30.0768	0.5
6.01526	38.9608	30.1184	0.5
6.02358	38.788	30.16	0.5
6.0319	38.6161	30.2016	0.5
6.04022	38.4469	30.2432	0.5
6.04854	38.278	30.2848	0.5
6.05686	38.1111	30.3264	0.5
6.06518	37.9482	30.368	0.5
6.0735	37.7848	30.4096	0.5
6.08182	37.6258	30.4512	0.5
6.09014	37.4678	30.4928	0.5
6.09846	37.3121	30.5344	0.5
6.10678	37.1562	30.576	0.5
6.1151	37.0005	30.6176	0.5
6.12342	36.8478	30.6592	0.5
6.13174	36.7003	30.7008	0.5
6.14006	36.5515	30.7424	0.5
6.14838	36.4005	30.784	0.5
6.1567	36.2496	30.8256	0.5
6.16502	36.1041	30.8672	0.5
6.17334	35.9558	30.9088	0.5
6.18166	35.8105	30.9504	0.5
6.18998	35.6707	30.992	0.5
6.1983	35.5348	31.0336	0.5
6.20662	35.3969	31.0752	0.5
6.21494	35.2606	31.1168	0.5
6.22326	35.1254	31.1584	0.5
6.23158	34.9892	31.2	0.5
6.23989	34.8568	31.2416	0.5
6.24822	34.7267	31.2832	0.5
6.25654	34.5999	31.3248	0.5
6.26485	34.4744	31.3664	0.5
6.27318	34.3478	31.408	0.5
6.28149	34.2211	31.4496	0.5
6.28981	34.0949	31.4912	0.5
6.29813	33.969	31.5328	0.5
6.30645	33.8445	31.5744	0.5
6.31477	33.7244	31.616	0.5
6.32309	33.6047	31.6576	0.5
6.33141	33.4899	31.6992	0.5
6.33973	33.3753	31.7408	0.5
6.34805	33.2609	31.7824	0.5
6.35637	33.1466	31.824	0.5
6.36469	33.03	31.8656	0.5
6.37301	32.914	31.9072	0.5
6.38133	32.8027	31.9488	0.5
6.38965	32.6938	31.9904	0.5
6.39797	32.5827	32.032	0.5
6.40629	32.4721	32.0736	0.5
6.41461	32.3651	32.1152	0.5
6.42293	32.2598	32.1568	0.5
6.43125	32.1531	32.1984	0.5
6.43957	32.0416	32.24	0.5
6.44789	31.9314	32.2816	0.5
6.45621	31.8256	32.3232	0.5
6.46453	31.7211	32.3648	0.5
6.47285	31.6196	32.4064	0.5
6.48117	31.5177	32.448	0.5
6.48949	31.4181	32.4896	0.5
6.49781	31.3194	32.5312	0.5
6.50613	31.2218	32.5728	0.5
6.51445	31.1237	32.6144	0.5
6.52277	31.0245	32.656	0.5
6.53109	30.929	32.6976	0.5
6.53941	30.8367	32.7392	0.5
6.54773	30.7461	32.7808	0.5
6.55605	30.6535	32.8224	0.5
6.56437	30.5625	32.864	0.5
6.57269	30.4726	32.9056	0.5
6.58101	30.3817	32.9472	0.5
6.58933	30.2894	32.9888	0.5
6.59765	30.1983	33.0304	0.5
6.60597	30.1096	33.072	0.5
6.61429	30.0219	33.1136	0.5
6.62261	29.9377	33.1552	0.5
6.63093	29.851	33.1968	0.5
6.63925	29.7603	33.2384	0.5
6.64757	29.6707	33.28	0.5
6.65589	29.5811	33.3216	0.5
6.66421	29.493	33.3632	0.5
6.67253	29.4084	33.4048	0.5
6.68085	29.3264	33.4464	0.5
6.68917	29.244	33.488	0.5
6.69749	29.1592	33.5296	0.5
6.70581	29.0734	33.5712	0.5
6.71413	28.9886	33.6128	0.5
6.72245	28.9028	33.6544	0.5
6.73077	28.8196	33.696	0.5
6.73909	28.7388	33.7376	0.5
6.74741	28.659	33.7792	0.5
6.75573	28.5818	33.8208	0.5
6.76405	28.5077	33.8624	0.5
6.77237	28.4297	33.904	0.5
6.78069	28.3495	33.9456	0.5
6.78901	28.2721	33.9872	0.5
6.79733	28.1959	34.0288	0.5
6.80565	28.1239	34.0704	0.5
6.81397	28.056	34.112	0.5
6.82229	27.9871	34.1536	0.5
6.83061	27.9154	34.1952	0.5
6.83892	27.8427	34.2368	0.5
6.84725	27.7711	34.2784	0.5
6.85557	27.7014	34.32	0.5
6.86388	27.6314	34.3616	0.5
6.87221	27.5613	34.4032	0.5
6.88052	27.4945	34.4448	0.5
6.88884	27.4269	34.4864	0.5
6.89716	27.3575	34.528	0.5
6.90548	27.2882	34.5696	0.5
6.9138	27.2178	34.6112	0.5
6.92212	27.1449	34.6528	0.5
6.93044	27.0753	34.6944	0.5
6.93876	27.0087	34.736	0.5
6.94708	26.9423	34.7776	0.5
6.9554	26.8772	34.8192	0.5
6.96372	26.8104	34.8608	0.5
6.97204	26.7438	34.9024	0.5
6.98036	26.6778	34.944	0.5
6.98868	26.6119	34.9856	0.5
6.997	26.5496	35.0272	0.5
7.00532	26.4872	35.0688	0.5
7.01364	26.424	35.1104	0.5
7.02196	26.3659	35.152	0.5
7.03028	26.3095	35.1936	0.5
7.0386	26.2525	35.2352	0.5
7.04692	26.1966	35.2768	0.5
7.05524	26.1391	35.3184	0.5
7.06356	26.0821	35.36	0.5
7.07188	26.0254	35.4016	0.5
7.0802	25.968	35.4432	0.5
7.08852	25.9132	35.4848	0.5
7.09684	25.8574	35.5264	0.5
7.10516	25.8002	35.568	0.5
7.11348	25.7443	35.6096	0.5
7.1218	25.6881	35.6512	0.5
7.13012	25.6308	35.6928	0.5
7.13844	25.5745	35.7344	0.5
7.14676	25.5188	35.776	0.5
7.15508	25.4646	35.8176	0.5
7.1634	25.4119	35.8592	0.5
7.17172	25.3585	35.9008	0.5
7.18004	25.3058	35.9424	0.5
7.18836	25.2537	35.984	0.5
7.19668	25.2042	36.0256	0.5
7.205	25.1576	36.0672	0.5
7.21332	25.1101	36.1088	0.5
7.22164	25.0626	36.1504	0.5
7.22996	25.0161	36.192	0.5
7.23828	24.9689	36.2336	0.5
7.2466	24.922	36.2752	0.5
7.25492	24.8741	36.3168	0.5
7.26324	24.8269	36.3584	0.5
7.27156	24.7821	36.4	0.5
7.27988	24.7376	36.4416	0.5
7.2882	24.693	36.4832	0.5
7.29652	24.647	36.5248	0.5
7.30484	24.6018	36.5664	0.5
7.31316	24.5569	36.608	0.5
7.32148	24.5138	36.6496	0.5
7.3298	24.4708	36.6912	0.5
7.33812	24.4268	36.7328	0.5
7.34644	24.3848	36.7744	0.5
7.35476	24.3421	36.816	0.5
7.36308	24.2983	36.8576	0.5
7.3714	24.254	36.8992	0.5
7.37972	24.2117	36.9408	0.5
7.38804	24.1706	36.9824	0.5
7.39636	24.1303	37.024	0.5
7.40468	24.0885	37.0656	0.5
7.41299	24.0481	37.1072	0.5
7.42131	24.0104	37.1488	0.5
7.42964	23.9725	37.1904	0.5
7.43795	23.9325	37.232	0.5
7.44627	23.8907	37.2736	0.5
7.4546	23.8504	37.3152	0.5
7.46291	23.8111	37.3568	0.5
7.47124	23.773	37.3984	0.5
7.47956	23.7335	37.44	0.5
7.48787	23.6926	37.4816	0.5
7.49619	23.6536	37.5232	0.5
7.50451	23.6146	37.5648	0.5
7.51283	23.577	37.6064	0.5
7.52115	23.5375	37.648	0.5
7.52947	23.498	37.6896	0.5
7.53779	23.4611	37.7312	0.5
7.54611	23.4246	37.7728	0.5
7.55443	23.3871	37.8144	0.5
7.56275	23.3486	37.856	0.5
7.57107	23.3143	37.8976	0.5
7.57939	23.2808	37.9392	0.5
7.58771	23.2461	37.9808	0.5
7.59603	23.2119	38.0224	0.5
7.60435	23.1766	38.064	0.5
7.61267	23.1415	38.1056	0.5
7.62099	23.1073	38.1472	0.5
7.62931	23.0741	38.1888	0.5
7.63763	23.0394	38.2304	0.5
7.64595	23.0018	38.272	0.5
7.65427	22.9686	38.3136	0.5
7.66259	22.9373	38.3552	0.5
7.67091	22.9036	38.3968	0.5
7.67923	22.868	38.4384	0.5
7.68755	22.8334	38.48	0.5
7.69587	22.7997	38.5216	0.5
7.70419	22.7677	38.5632	0.5
7.71251	22.7363	38.6048	0.5
7.72083	22.7046	38.6464	0.5
7.72915	22.6714	38.688	0.5
7.73747	22.6388	38.7296	0.5
7.74579	22.6095	38.7712	0.5
7.75411	22.5785	38.8128	0.5
7.76243	22.5433	38.8544	0.5
7.77075	22.5113	38.896	0.5
7.77907	22.4827	38.9376	0.5
7.78739	22.4537	38.9792	0.5
7.79571	22.426	39.0208	0.5
7.80403	22.3971	39.0624	0.5
7.81235	22.3672	39.104	0.5
7.82067	22.3371	39.1456	0.5
7.82899	22.3056	39.1872	0.5
7.83731	22.2729	39.2288	0.5
7.84563	22.2434	39.2704	0.5
7.85395	22.2145	39.312	0.5
7.86227	22.1852	39.3536	0.5
7.87059	22.155	39.3952	0.5
7.87891	22.1239	39.4368	0.5
7.88723	22.0948	39.4784	0.5
7.89555	22.0652	39.52	0.5
7.90387	22.0359	39.5616	0.5
7.91219	22.0073	39.6032	0.5
7.92051	21.978	39.6448	0.5
7.92883	21.9496	39.6864	0.5
7.93715	21.9191	39.728	0.5
7.94547	21.8892	39.7696	0.5
7.95379	21.86	39.8112	0.5
7.96211	21.8326	39.8528	0.5
7.97043	21.8063	39.8944	0.5
7.97875	21.7793	39.936	0.5
7.98707	21.7544	39.9776	0.5
7.99539	21.7285	40.0192	0.5
8.00371	21.7002	40.0608	0.5
8.01203	21.6742	40.1024	0.5
8.02035	21.6478	40.144	0.5
8.02867	21.6233	40.1856	0.5
8.03698	21.5965	40.2272	0.5
8.04531	21.5705	40.2688	0.5
8.05363	21.5444	40.3104	0.5
8.06194	21.5164	40.352	0.5
8.07026	21.4895	40.3936	0.5
8.07859	21.4661	40.4352	0.5
8.0869	21.4397	40.4768	0.5
8.09522	21.4111	40.5184	0.5
8.10354	21.3833	40.56	0.5
8.11186	21.3553	40.6016	0.5
8.12018	21.3286	40.6432	0.5
8.1285	21.3027	40.6848	0.5
8.13682	21.2751	40.7264	0.5
8.14514	21.2489	40.768	0.5
8.15346	21.2238	40.8096	0.5
8.16178	21.199	40.8512	0.5
8.1701	21.1731	40.8928	0.5
8.17842	21.1472	40.9344	0.5
8.18674	21.1212	40.976	0.5
8.19506	21.0951	41.0176	0.5
8.20338	21.0687	41.0592	0.5
8.2117	21.0452	41.1008	0.5
8.22002	21.0242	41.1424	0.5
8.22834	21.002	41.184	0.5
8.23666	20.9799	41.2256	0.5
8.24498	20.9589	41.2672	0.5
8.2533	20.9365	41.3088	0.5
8.26162	20.9142	41.3504	0.5
8.26994	20.8906	41.392	0.5
8.27826	20.8665	41.4336	0.5
8.28658	20.8419	41.4752	0.5
8.2949	20.8186	41.5168	0.5
8.30322	20.7979	41.5584	0.5
8.31154	20.7758	41.6	0.5
8.31986	20.7537	41.6416	0.5
8.32818	20.7294	41.6832	0.5
8.3365	20.7054	41.7248	0.5
8.34482	20.6817	41.7664	0.5
8.35314	20.6568	41.808	0.5
8.36146	20.6357	41.8496	0.5
8.36978	20.6146	41.8912	0.5
8.3781	20.597	41.9328	0.5
8.38642	20.5783	41.9744	0.5
8.39474	20.5585	42.016	0.5
8.40306	20.537	42.0576	0.5
8.41138	20.5141	42.0992	0.5
8.4197	20.4933	42.1408	0.5
8.42802	20.4742	42.1824	0.5
8.43634	20.4543	42.224	0.5
8.44466	20.434	42.2656	0.5
8.45298	20.4164	42.3072	0.5
8.4613	20.3974	42.3488	0.5
8.46962	20.3759	42.3904	0.5
8.47794	20.3528	42.432	0.5
8.48626	20.3295	42.4736	0.5
8.49458	20.3075	42.5152	0.5
8.5029	20.2876	42.5568	0.5
8.51122	20.2677	42.5984	0.5
8.51954	20.2453	42.64	0.5
8.52786	20.2203	42.6816	0.5
8.53618	20.1942	42.7232	0.5
8.5445	20.1713	42.7648	0.5
8.55282	20.1485	42.8064	0.5
8.56114	20.125	42.848	0.5
8.56946	20.1061	42.8896	0.5
8.57778	20.0872	42.9312	0.5
8.5861	20.0665	42.9728	0.5
8.59442	20.0462	43.0144	0.5
8.60274	20.024	43.056	0.5
8.61106	20.0032	43.0976	0.5
8.61937	19.9861	43.1392	0.5
8.62769	19.967	43.1808	0.5
8.63602	19.9477	43.2224	0.5
8.64433	19.932	43.264	0.5
8.65265	19.9123	43.3056	0.5
8.66098	19.8948	43.3472	0.5
8.66929	19.8741	43.3888	0.5
8.67761	19.8558	43.4304	0.5
8.68593	19.8395	43.472	0.5
8.69425	19.8204	43.5136	0.5
8.70257	19.8024	43.5552	0.5
8.71089	19.7814	43.5968	0.5
8.71921	19.7611	43.6384	0.5
8.72753	19.741	43.68	0.5
8.73585	19.7228	43.7216	0.5
8.74417	19.7048	43.7632	0.5
8.75249	19.6883	43.8048	0.5
8.76081	19.6688	43.8464	0.5
8.76913	19.6482	43.888	0.5
8.77745	19.6277	43.9296	0.5
8.78577	19.6075	43.9712	0.5
8.79409	19.5889	44.0128	0.5
8.80241	19.5698	44.0544	0.5
8.81073	19.5555	44.096	0.5
8.81905	19.5414	44.1376	0.5
8.82737	19.5249	44.1792	0.5
8.83569	19.5048	44.2208	0.5
8.84401	19.4864	44.2624	0.5
8.85233	19.4643	44.304	0.5
8.86065	19.4439	44.3456	0.5
8.86897	19.4285	44.3872	0.5
8.87729	19.414	44.4288	0.5
8.88561	19.397	44.4704	0.5
8.89393	19.3779	44.512	0.5
8.90225	19.3602	44.5536	0.5
8.91057	19.3393	44.5952	0.5
8.91889	19.3196	44.6368	0.5
8.92721	19.3016	44.6784	0.5
8.93553	19.2849	44.72	0.5
8.94385	19.2682	44.7616	0.5
8.95217	19.2557	44.8032	0.5
8.96049	19.2399	44.8448	0.5
8.96881	19.2247	44.8864	0.5
8.97713	19.2077	44.928	0.5
8.98545	19.1933	44.9696	0.5
8.99377	19.1789	45.0112	0.5
9.00209	19.1631	45.0528	0.5
9.01041	19.1463	45.0944	0.5
9.01873	19.1309	45.136	0.5
9.02705	19.1151	45.1776	0.5
9.03537	19.0975	45.2192	0.5
9.04369	19.0826	45.2608	0.5
9.05201	19.0649	45.3024	0.5
9.06033	19.0465	45.344	0.5
9.06865	19.0333	45.3856	0.5
9.07697	19.0172	45.4272	0.5
9.08529	19.001	45.4688	0.5
9.09361	18.9835	45.5104	0.5
9.10193	18.9654	45.552	0.5
9.11025	18.9529	45.5936	0.5
9.11857	18.9403	45.6352	0.5
9.12689	18.9239	45.6768	0.5
9.13521	18.9088	45.7184	0.5
9.14353	18.8954	45.76	0.5
9.15185	18.8819	45.8016	0.5
9.16017	18.8688	45.8432	0.5
9.16849	18.8525	45.8848	0.5
9.1768	18.8373	45.9264	0.5
9.18512	18.8202	45.968	0.5
9.19345	18.8053	46.0096	0.5
9.20176	18.7912	46.0512	0.5
9.21008	18.7752	46.0928	0.5
9.21841	18.7603	46.1344	0.5
9.22673	18.7454	46.176	0.5
9.23504	18.7308	46.2176	0.5
9.24337	18.7153	46.2592	0.5
9.25169	18.702	46.3008	0.5
9.26	18.6865	46.3424	0.5
9.26833	18.6735	46.384	0.5
9.27665	18.6593	46.4256	0.5
9.28496	18.6473	46.4672	0.5
9.29328	18.6349	46.5088	0.5
9.3016	18.6175	46.5504	0.5
9.30992	18.604	46.592	0.5
9.31824	18.59	46.6336	0.5
9.32656	18.5751	46.6752	0.5
9.33488	18.5601	46.7168	0.5
9.3432	18.5439	46.7584	0.5
9.35152	18.5278	46.8	0.5
9.35984	18.5111	46.8416	0.5
9.36816	18.4973	46.8832	0.5
9.37648	18.4829	46.9248	0.5
9.3848	18.4656	46.9664	0.5
9.39312	18.4487	47.008	0.5
9.40144	18.4373	47.0496	0.5
9.40976	18.4244	47.0912	0.5
9.41808	18.4105	47.1328	0.5
9.4264	18.3945	47.1744	0.5
9.43472	18.3803	47.216	0.5
9.44304	18.3672	47.2576	0.5
9.45136	18.353	47.2992	0.5
9.45968	18.3406	47.3408	0.5
9.468	18.3257	47.3824	0.5
9.47632	18.3132	47.424	0.5
9.48464	18.3025	47.4656	0.5
9.49296	18.2919	47.5072	0.5
9.50128	18.279	47.5488	0.5
9.5096	18.2682	47.5904	0.5
9.51792	18.2559	47.632	0.5
9.52624	18.2454	47.6736	0.5
9.53456	18.2344	47.7152	0.5
9.54288	18.2256	47.7568	0.5
9.5512	18.2123	47.7984	0.5
9.55952	18.2003	47.84	0.5
9.56784	18.1907	47.8816	0.5
9.57616	18.1807	47.9232	0.5
9.58448	18.1665	47.9648	0.5
9.5928	18.1522	48.0064	0.5
9.60112	18.1397	48.048	0.5
9.60944	18.1291	48.0896	0.5
9.61776	18.1174	48.1312	0.5
9.62608	18.1061	48.1728	0.5
9.6344	18.0946	48.2144	0.5
9.64272	18.0821	48.256	0.5
9.65104	18.0689	48.2976	0.5
9.65936	18.0572	48.3392	0.5
9.66768	18.0474	48.3808	0.5
9.676	18.0357	48.4224	0.5
9.68432	18.0229	48.464	0.5
9.69264	18.0138	48.5056	0.5
9.70096	18.0018	48.5472	0.5
9.70928	17.9898	48.5888	0.5
9.7176	17.9786	48.6304	0.5
9.72592	17.9659	48.672	0.5
9.73424	17.9582	48.7136	0.5
9.74256	17.947	48.7552	0.5
9.75088	17.9403	48.7968	0.5
9.7592	17.9315	48.8384	0.5
9.76752	17.9247	48.88	0.5
9.77584	17.9168	48.9216	0.5
9.78416	17.9122	48.9632	0.5
9.79248	17.9046	49.0048	0.5
9.8008	17.8932	49.0464	0.5
9.80912	17.8839	49.088	0.5
9.81743	17.8696	49.1296	0.5
9.82575	17.8608	49.1712	0.5
9.83408	17.8508	49.2128	0.5
9.84239	17.8409	49.2544	0.5
9.85071	17.8292	49.296	0.5
9.85904	17.8209	49.3376	0.5
9.86735	17.8053	49.3792	0.5
9.87567	17.7946	49.4208	0.5
9.88399	17.783	49.4624	0.5
9.89231	17.7715	49.504	0.5
9.90063	17.7619	49.5456	0.5
9.90895	17.7538	49.5872	0.5
9.91727	17.7456	49.6288	0.5
9.92559	17.7355	49.6704	0.5
9.93391	17.7269	49.712	0.5
9.94223	17.7167	49.7536	0.5
9.95055	17.7057	49.7952	0.5
9.95887	17.6945	49.8368	0.5
9.96719	17.6876	49.8784	0.5
9.97551	17.6748	49.92	0.5
9.98383	17.664	49.9616	0.5
9.99215	17.6542	50.0032	0.5
10.0005	17.644	50.0448	0.5
10.0088	17.6336	50.0864	0.5
10.0171	17.6247	50.128	0.5
10.0254	17.6165	50.1696	0.5
10.0337	17.608	50.2112	0.5
10.0421	17.5979	50.2528	0.5
10.0504	17.5908	50.2944	0.5
10.0587	17.5834	50.336	0.5
10.067	17.5706	50.3776	0.5
10.0754	17.5641	50.4192	0.5
10.0837	17.5549	50.4608	0.5
10.092	17.5461	50.5024	0.5
10.1003	17.5384	50.544	0.5
10.1086	17.5316	50.5856	0.5
10.1169	17.5229	50.6272	0.5
10.1253	17.516	50.6688	0.5
10.1336	17.5077	50.7104	0.5
10.1419	17.4965	50.752	0.5
10.1502	17.491	50.7936	0.5
10.1585	17.4838	50.8352	0.5
10.1669	17.4783	50.8768	0.5
10.1752	17.4747	50.9184	0.5
10.1835	17.4671	50.96	0.5
10.1918	17.4592	51.0016	0.5
10.2002	17.4488	51.0432	0.5
10.2085	17.4425	51.0848	0.5
10.2168	17.437	51.1264	0.5
10.2251	17.4305	51.168	0.5
10.2334	17.4244	51.2096	0.5
10.2417	17.4191	51.2512	0.5
10.2501	17.414	51.2928	0.5
10.2584	17.4034	51.3344	0.5
10.2667	17.3927	51.376	0.5
10.275	17.3853	51.4176	0.5
10.2834	17.3813	51.4592	0.5
10.2917	17.3766	51.5008	0.5
10.3	17.3721	51.5424	0.5
10.3083	17.3658	51.584	0.5
10.3166	17.3588	51.6256	0.5
10.3249	17.3487	51.6672	0.5
10.3333	17.3406	51.7088	0.5
10.3416	17.3371	51.7504	0.5
10.3499	17.3297	51.792	0.5
10.3582	17.3252	51.8336	0.5
10.3666	17.3225	51.8752	0.5
10.3749	17.3154	51.9168	0.5
10.3832	17.3056	51.9584	0.5
10.3915	17.3014	52	0.5
10.3998	17.2928	52.0416	0.5
10.4081	17.2875	52.0832	0.5
10.4165	17.2848	52.1248	0.5
10.4248	17.283	52.1664	0.5
10.4331	17.2829	52.208	0.5
10.4414	17.2767	52.2496	0.5
10.4497	17.2729	52.2912	0.5
10.4581	17.2671	52.3328	0.5
10.4664	17.2707	52.3744	0.5
10.4747	17.2668	52.416	0.5
10.483	17.2648	52.4576	0.5
10.4913	17.2608	52.4992	0.5
10.4997	17.2569	52.5408	0.5
10.508	17.2529	52.5824	0.5
10.5163	17.2463	52.624	0.5
10.5246	17.2372	52.6656	0.5
10.5329	17.2313	52.7072	0.5
10.5413	17.2252	52.7488	0.5
10.5496	17.218	52.7904	0.5
10.5579	17.2117	52.832	0.5
10.5662	17.2024	52.8736	0.5
10.5745	17.192	52.9152	0.5
10.5829	17.1884	52.9568	0.5
10.5912	17.1856	52.9984	0.5
10.5995	17.1809	53.04	0.5
10.6078	17.1781	53.0816	0.5
10.6161	17.1752	53.1232	0.5
10.6245	17.1731	53.1648	0.5
10.6328	17.1693	53.2064	0.5
10.6411	17.1631	53.248	0.5
10.6494	17.1637	53.2896	0.5
10.6577	17.1623	53.3312	0.5
10.6661	17.1584	53.3728	0.5
10.6744	17.156	53.4144	0.5
10.6827	17.1565	53.456	0.5
10.691	17.1515	53.4976	0.5
10.6993	17.1439	53.5392	0.5
10.7077	17.1386	53.5808	0.5
10.716	17.1351	53.6224	0.5
10.7243	17.1308	53.664	0.5
10.7326	17.1268	53.7056	0.5
10.7409	17.1249	53.7472	0.5
10.7493	17.1258	53.7888	0.5
10.7576	17.12	53.8304	0.5
10.7659	17.1152	53.872	0.5
10.7742	17.1119	53.9136	0.5
10.7825	17.1069	53.9552	0.5
10.7909	17.1021	53.9968	0.5
10.7992	17.0996	54.0384	0.5
10.8075	17.1017	54.08	0.5
10.8158	17.0997	54.1216	0.5
10.8241	17.0962	54.1632	0.5
10.8325	17.0968	54.2048	0.5
10.8408	17.0949	54.2464	0.5
10.8491	17.0904	54.288	0.5
10.8574	17.086	54.3296	0.5
10.8657	17.0843	54.3712	0.5
10.8741	17.0822	54.4128	0.5
10.8824	17.0805	54.4544	0.5
10.8907	17.0789	54.496	0.5
10.899	17.0781	54.5376	0.5
10.9073	17.0769	54.5792	0.5
10.9157	17.0727	54.6208	0.5
10.924	17.0706	54.6624	0.5
10.9323	17.0699	54.704	0.5
10.9406	17.0672	54.7456	0.5
10.9489	17.0651	54.7872	0.5
10.9573	17.0659	54.8288	0.5
10.9656	17.0676	54.8704	0.5
10.9739	17.0656	54.912	0.5
10.9822	17.0629	54.9536	0.5
10.9905	17.0635	54.9952	0.5
10.9989	17.0625	55.0368	0.5
11.0072	17.0612	55.0784	0.5
11.0155	17.0627	55.12	0.5
11.0238	17.0625	55.1616	0.5
11.0321	17.0611	55.2032	0.5
11.0405	17.0619	55.2448	0.5
11.0488	17.0632	55.2864	0.5
11.0571	17.0633	55.328	0.5
11.0654	17.062	55.3696	0.5
11.0737	17.0639	55.4112	0.5
11.0821	17.068	55.4528	0.5
11.0904	17.0724	55.4944	0.5
11.0987	17.0741	55.536	0.513331
11.107	17.0757	55.5776	0.6
11.1153	17.0758	55.6192	0.6
11.1236	17.075	55.6608	0.6
11.132	17.0764	55.7024	0.6
11.1403	17.0744	55.744	0.6
11.1486	17.0765	55.7856	0.6
11.1569	17.0789	55.8272	0.6
11.1653	17.0845	55.8688	0.6
11.1736	17.0849	55.9104	0.6
11.1819	17.084	55.952	0.6
11.1902	17.0816	55.9936	0.6
11.1985	17.0829	56.0352	0.6
11.2068	17.0847	56.0768	0.6
11.2152	17.0853	56.1184	0.6
11.2235	17.0872	56.16	0.6
11.2318	17.0888	56.2016	0.6
11.2401	17.0944	56.2432	0.6
11.2485	17.0953	56.2848	0.6
11.2568	17.0979	56.3264	0.6
11.2651	17.0983	56.368	0.6
11.2734	17.0989	56.4096	0.6
11.2817	17.1006	56.4512	0.6
11.2901	17.1029	56.4928	0.6
11.2984	17.1055	56.5344	0.6
11.3067	17.1067	56.576	0.6
11.315	17.1075	56.6176	0.6
11.3233	17.1096	56.6592	0.6
11.3316	17.1142	56.7008	0.6
11.34	17.1169	56.7424	0.6
11.3483	17.1163	56.784	0.6
11.3566	17.1194	56.8256	0.6
11.3649	17.121	56.8672	0.6
11.3733	17.1205	56.9088	0.6
11.3816	17.1218	56.9504	0.6
11.3899	17.1255	56.992	0.6
11.3982	17.1267	57.0336	0.6
11.4065	17.129	57.0752	0.6
11.4148	17.1335	57.1168	0.6
11.4232	17.1391	57.1584	0.6
11.4315	17.1472	57.2	0.6
11.4398	17.1499	57.2416	0.6
11.4481	17.1527	57.2832	0.6
11.4565	17.1585	57.3248	0.6
11.4648	17.1611	57.3664	0.6
11.4731	17.1646	57.408	0.6
11.4814	17.1717	57.4496	0.6
11.4897	17.1755	57.4912	0.6
11.498	17.1787	57.5328	0.6
11.5064	17.184	57.5744	0.6
11.5147	17.188	57.616	0.6
11.523	17.1895	57.6576	0.6
11.5313	17.1909	57.6992	0.6
11.5396	17.191	57.7408	0.6
11.548	17.1952	57.7824	0.6
11.5563	17.1978	57.824	0.6
11.5646	17.2023	57.8656	0.6
11.5729	17.2063	57.9072	0.6
11.5813	17.2084	57.9488	0.6
11.5896	17.2122	57.9904	0.6
11.5979	17.22	58.032	0.6
11.6062	17.2267	58.0736	0.6
11.6145	17.2296	58.1152	0.6
11.6228	17.2333	58.1568	0.6
11.6312	17.2385	58.1984	0.6
11.6395	17.2427	58.24	0.6
11.6478	17.2476	58.2816	0.6
11.6561	17.2519	58.3232	0.6
11.6644	17.2581	58.3648	0.6
11.6728	17.2642	58.4064	0.6
11.6811	17.2735	58.448	0.6
11.6894	17.2818	58.4896	0.6
11.6977	17.2874	58.5312	0.6
11.706	17.2939	58.5728	0.6
11.7144	17.3017	58.6144	0.6
11.7227	17.3083	58.656	0.6
11.731	17.3171	58.6976	0.6
11.7393	17.3253	58.7392	0.6
11.7476	17.3316	58.7808	0.6
11.756	17.3373	58.8224	0.6
11.7643	17.3451	58.864	0.6
11.7726	17.3491	58.9056	0.6
11.7809	17.3508	58.9472	0.6
11.7892	17.3546	58.9888	0.6
11.7976	17.3602	59.0304	0.6
11.8059	17.3629	59.072	0.6
11.8142	17.3668	59.1136	0.6
11.8225	17.3741	59.1552	0.6
11.8308	17.3804	59.1968	0.6
11.8392	17.3863	59.2384	0.6
11.8475	17.3934	59.28	0.6
11.8558	17.4037	59.3216	0.6
11.8641	17.4117	59.3632	0.6
11.8724	17.4218	59.4048	0.6
11.8808	17.4314	59.4464	0.6
11.8891	17.4401	59.488	0.6
11.8974	17.4493	59.5296	0.6
11.9057	17.4576	59.5712	0.6
11.914	17.4686	59.6128	0.6
11.9224	17.4784	59.6544	0.6
11.9307	17.4842	59.696	0.6
11.939	17.4921	59.7376	0.6
11.9473	17.5039	59.7792	0.6
11.9556	17.5147	59.8208	0.6
11.964	17.5225	59.8624	0.6
11.9723	17.5279	59.904	0.6
11.9806	17.5357	59.9456	0.6
11.9889	17.5441	59.9872	0.6
11.9972	17.5539	60.0288	0.6
12.0056	17.5633	60.0704	0.6
12.0139	17.5725	60.112	0.6
12.0222	17.5797	60.1536	0.6
12.0305	17.5879	60.1952	0.6
12.0388	17.5973	60.2368	0.6
12.0472	17.6049	60.2784	0.6
12.0555	17.6096	60.32	0.6
12.0638	17.6168	60.3616	0.6
12.0721	17.6259	60.4032	0.6
12.0804	17.6343	60.4448	0.6
12.0888	17.642	60.4864	0.6
12.0971	17.6514	60.528	0.6
12.1054	17.6644	60.5696	0.6
12.1137	17.6736	60.6112	0.6
12.122	17.6827	60.6528	0.6
12.1304	17.6925	60.6944	0.6
12.1387	17.7008	60.736	0.6
12.147	17.7112	60.7776	0.6
12.1553	17.7224	60.8192	0.6
12.1636	17.731	60.8608	0.6
12.172	17.7412	60.9024	0.6
12.1803	17.7501	60.944	0.6
12.1886	17.7617	60.9856	0.6
12.1969	17.7743	61.0272	0.6
12.2052	17.787	61.0688	0.6
12.2136	17.7982	61.1104	0.6
12.2219	17.8091	61.152	0.6
12.2302	17.8216	61.1936	0.6
12.2385	17.8344	61.2352	0.6
12.2468	17.8467	61.2768	0.6
12.2552	17.858	61.3184	0.6
12.2635	17.8692	61.36	0.6
12.2718	17.8827	61.4016	0.6
12.2801	17.8982	61.4432	0.6
12.2884	17.9124	61.4848	0.6
12.2967	17.9235	61.5264	0.6
12.3051	17.9324	61.568	0.6
12.3134	17.9413	61.6096	0.6
12.3217	17.9495	61.6512	0.6
12.33	17.9609	61.6928	0.6
12.3384	17.975	61.7344	0.6
12.3467	17.9902	61.776	0.6
12.355	18.0029	61.8176	0.6
12.3633	18.0141	61.8592	0.6
12.3716	18.0266	61.9008	0.6
12.3799	18.0386	61.9424	0.6
12.3883	18.0493	61.984	0.6
12.3966	18.0609	62.0256	0.6
12.4049	18.0745	62.0672	0.6
12.4132	18.0893	62.1088	0.6
12.4215	18.1029	62.1504	0.6
12.4299	18.1132	62.192	0.6
12.4382	18.1237	62.2336	0.6
12.4465	18.1337	62.2752	0.6
12.4548	18.1442	62.3168	0.6
12.4632	18.1557	62.3584	0.6
12.4715	18.1687	62.4	0.6
12.4798	18.1806	62.4416	0.6
12.4881	18.1914	62.4832	0.6
12.4964	18.2046	62.5248	0.6
12.5047	18.2157	62.5664	0.6
12.5131	18.2282	62.608	0.6
12.5214	18.2429	62.6496	0.6
12.5297	18.2555	62.6912	0.6
12.538	18.268	62.7328	0.6
12.5464	18.2842	62.7744	0.6
12.5547	18.3002	62.816	0.6
12.563	18.3153	62.8576	0.6
12.5713	18.3302	62.8992	0.6
12.5796	18.3438	62.9408	0.6
12.5879	18.3577	62.9824	0.6
12.5963	18.3706	63.024	0.6
12.6046	18.3851	63.0656	0.6
12.6129	18.402	63.1072	0.6
12.6212	18.4148	63.1488	0.6
12.6296	18.4282	63.1904	0.6
12.6379	18.4446	63.232	0.6
12.6462	18.4606	63.2736	0.6
12.6545	18.4727	63.3152	0.6
12.6628	18.4865	63.3568	0.6
12.6712	18.5029	63.3984	0.6
12.6795	18.5171	63.44	0.6
12.6878	18.5311	63.4816	0.6
12.6961	18.5469	63.5232	0.6
12.7044	18.5658	63.5648	0.6
12.7127	18.5832	63.6064	0.6
12.7211	18.5973	63.648	0.6
12.7294	18.612	63.6896	0.6
12.7377	18.6282	63.7312	0.6
12.746	18.6454	63.7728	0.6
12.7544	18.6628	63.8144	0.6
12.7627	18.6791	63.856	0.6
12.771	18.6947	63.8976	0.6
12.7793	18.7116	63.9392	0.6
12.7876	18.7263	63.9808	0.6
12.7959	18.7438	64.0224	0.6
12.8043	18.7617	64.064	0.6
12.8126	18.7799	64.1056	0.6
12.8209	18.799	64.1472	0.6
12.8292	18.8184	64.1888	0.6
12.8375	18.8354	64.2304	0.6
12.8459	18.8502	64.272	0.6
12.8542	18.8664	64.3136	0.6
12.8625	18.8833	64.3552	0.6
12.8708	18.9015	64.3968	0.6
12.8791	18.9186	64.4384	0.6
12.8875	18.935	64.48	0.6
12.8958	18.9515	64.5216	0.6
12.9041	18.9675	64.5632	0.6
12.9124	18.9813	64.6048	0.6
12.9207	18.9966	64.6464	0.6
12.9291	19.0147	64.688	0.6
12.9374	19.0317	64.7296	0.6
12.9457	19.0471	64.7712	0.6
12.954	19.0654	64.8128	0.6
12.9623	19.0841	64.8544	0.6
12.9707	19.1016	64.896	0.6
12.979	19.1181	64.9376	0.6
12.9873	19.1355	64.9792	0.6
12.9956	19.1576	65.0208	0.6
13.0039	19.1792	65.0624	0.6
13.0123	19.199	65.104	0.6
13.0206	19.2203	65.1456	0.6
13.0289	19.2412	65.1872	0.6
13.0372	19.2626	65.2288	0.6
13.0455	19.2842	65.2704	0.6
13.0539	19.3058	65.312	0.6
13.0622	19.3274	65.3536	0.6
13.0705	19.3486	65.3952	0.6
13.0788	19.3708	65.4368	0.6
13.0871	19.3916	65.4784	0.6
13.0955	19.4113	65.52	0.6
13.1038	19.4291	65.5616	0.6
13.1121	19.4473	65.6032	0.6
13.1204	19.4663	65.6448	0.6
13.1287	19.4844	65.6864	0.6
13.1371	19.5035	65.728	0.6
13.1454	19.5236	65.7696	0.6
13.1537	19.5438	65.8112	0.6
13.162	19.5627	65.8528	0.6
13.1703	19.5802	65.8944	0.6
13.1787	19.5985	65.936	0.6
13.187	19.6182	65.9776	0.6
13.1953	19.6401	66.0192	0.6
13.2036	19.6638	66.0608	0.6
13.2119	19.6874	66.1024	0.6
13.2203	19.7087	66.144	0.6
13.2286	19.7285	66.1856	0.6
13.2369	19.7489	66.2272	0.6
13.2452	19.7702	66.2688	0.6
13.2535	19.7893	66.3104	0.6
13.2619	19.8102	66.352	0.6
13.2702	19.8333	66.3936	0.6
13.2785	19.8577	66.4352	0.6
13.2868	19.8845	66.4768	0.6
13.2951	19.9078	66.5184	0.6
13.3035	19.9287	66.56	0.6
13.3118	19.9512	66.6016	0.6
13.3201	19.9734	66.6432	0.6
13.3284	19.9959	66.6848	0.6
13.3367	20.0218	66.7264	0.6
13.3451	20.0491	66.768	0.6
13.3534	20.0733	66.8096	0.6
13.3617	20.0965	66.8512	0.6
13.37	20.1185	66.8928	0.6
13.3783	20.1403	66.9344	0.6
13.3867	20.1612	66.976	0.6
13.395	20.1831	67.0176	0.6
13.4033	20.2065	67.0592	0.6
13.4116	20.2284	67.1008	0.6
13.4199	20.2526	67.1424	0.6
13.4283	20.2787	67.184	0.6
13.4366	20.3023	67.2256	0.6
13.4449	20.3232	67.2672	0.6
13.4532	20.3443	67.3088	0.6
13.4615	20.3668	67.3504	0.6
13.4698	20.3915	67.392	0.6
13.4782	20.4181	67.4336	0.6
13.4865	20.445	67.4752	0.6
13.4948	20.4686	67.5168	0.6
13.5031	20.49	67.5584	0.6
13.5114	20.5129	67.6	0.6
13.5198	20.5358	67.6416	0.6
13.5281	20.5589	67.6832	0.6
13.5364	20.5819	67.7248	0.6
13.5447	20.6073	67.7664	0.6
13.5531	20.6343	67.808	0.6
13.5614	20.6588	67.8496	0.6
13.5697	20.6828	67.8912	0.6
13.578	20.707	67.9328	0.6
13.5863	20.7315	67.9744	0.6
13.5946	20.7567	68.016	0.6
13.603	20.783	68.0576	0.6
13.6113	20.8109	68.0992	0.6
13.6196	20.8395	68.1408	0.6
13.6279	20.8672	68.1824	0.6
13.6363	20.8939	68.224	0.6
13.6446	20.9172	68.2656	0.6
13.6529	20.9375	68.3072	0.6
13.6612	20.9579	68.3488	0.6
13.6695	20.9792	68.3904	0.6
13.6778	21.0025	68.432	0.6
13.6862	21.0264	68.4736	0.6
13.6945	21.0498	68.5152	0.6
13.7028	21.0728	68.5568	0.6
13.7111	21.0962	68.5984	0.6
13.7195	21.1199	68.64	0.6
13.7278	21.1449	68.6816	0.6
13.7361	21.1697	68.7232	0.6
13.7444	21.1966	68.7648	0.6
13.7527	21.228	68.8064	0.6
13.761	21.2591	68.848	0.6
13.7694	21.2896	68.8896	0.6
13.7777	21.3208	68.9312	0.6
13.786	21.3515	68.9728	0.6
13.7943	21.3826	69.0144	0.6
13.8026	21.4137	69.056	0.6
13.811	21.4448	69.0976	0.6
13.8193	21.4772	69.1392	0.6
13.8276	21.5091	69.1808	0.6
13.8359	21.541	69.2224	0.6
13.8443	21.5716	69.264	0.6
13.8526	21.6016	69.3056	0.6
13.8609	21.6317	69.3472	0.6
13.8692	21.6608	69.3888	0.6
13.8775	21.6893	69.4304	0.6
13.8858	21.7188	69.472	0.6
13.8942	21.749	69.5136	0.6
13.9025	21.7797	69.5552	0.6
13.9108	21.8101	69.5968	0.6
13.9191	21.8405	69.6384	0.6
13.9275	21.8707	69.68	0.6
13.9358	21.8998	69.7216	0.6
13.9441	21.9283	69.7632	0.6
13.9524	21.9572	69.8048	0.6
13.9607	21.9882	69.8464	0.6
13.969	22.018	69.888	0.6
13.9774	22.0484	69.9296	0.6
13.9857	22.082	69.9712	0.6
13.994	22.1152	70.0128	0.6
14.0023	22.1458	70.0544	0.6
14.0107	22.1744	70.096	0.6
14.019	22.2032	70.1376	0.6
14.0273	22.2319	70.1792	0.6
14.0356	22.2595	70.2208	0.6
14.0439	22.2887	70.2624	0.6
14.0522	22.3205	70.304	0.6
14.0606	22.3525	70.3456	0.6
14.0689	22.3854	70.3872	0.6
14.0772	22.4206	70.4288	0.6
14.0855	22.4548	70.4704	0.6
14.0938	22.4853	70.512	0.6
14.1022	22.5166	70.5536	0.6
14.1105	22.5509	70.5952	0.6
14.1188	22.5856	70.6368	0.6
14.1271	22.6226	70.6784	0.6
14.1354	22.6594	70.72	0.6
14.1438	22.695	70.7616	0.6
14.1521	22.7291	70.8032	0.6
14.1604	22.7635	70.8448	0.6
14.1687	22.7995	70.8864	0.6
14.177	22.8336	70.928	0.6
14.1854	22.8659	70.9696	0.6
14.1937	22.8994	71.0112	0.6
14.202	22.934	71.0528	0.6
14.2103	22.9699	71.0944	0.6
14.2186	23.0039	71.136	0.6
14.227	23.037	71.1776	0.6
14.2353	23.0714	71.2192	0.6
14.2436	23.1038	71.2608	0.6
14.2519	23.1361	71.3024	0.6
14.2602	23.1689	71.344	0.6
14.2686	23.1991	71.3856	0.6
14.2769	23.2312	71.4272	0.6
14.2852	23.2648	71.4688	0.6
14.2935	23.2993	71.5104	0.6
14.3018	23.3343	71.552	0.6
14.3102	23.3693	71.5936	0.6
14.3185	23.4025	71.6352	0.6
14.3268	23.4363	71.6768	0.6
14.3351	23.4705	71.7184	0.6
14.3434	23.5035	71.76	0.6
14.3518	23.5384	71.8016	0.6
14.3601	23.5737	71.8432	0.6
14.3684	23.6085	71.8848	0.6
14.3767	23.6462	71.9264	0.6
14.385	23.6839	71.968	0.6
14.3934	23.7209	72.0096	0.6
14.4017	23.7577	72.0512	0.6
14.41	23.7934	72.0928	0.6
14.4183	23.8303	72.1344	0.6
14.4266	23.868	72.176	0.6
14.435	23.9053	72.2176	0.6
14.4433	23.944	72.2592	0.6
14.4516	23.9834	72.3008	0.6
14.4599	24.0221	72.3424	0.6
14.4682	24.0617	72.384	0.6
14.4766	24.0993	72.4256	0.6
14.4849	24.1348	72.4672	0.6
14.4932	24.174	72.5088	0.6
14.5015	24.2138	72.5504	0.6
14.5098	24.2511	72.592	0.6
14.5182	24.2889	72.6336	0.6
14.5265	24.3254	72.6752	0.6
14.5348	24.3608	72.7168	0.6
14.5431	24.4002	72.7584	0.6
14.5514	24.4391	72.8	0.6
14.5598	24.4768	72.8416	0.6
14.5681	24.5156	72.8832	0.6
14.5764	24.5557	72.9248	0.6
14.5847	24.5951	72.9664	0.6
14.593	24.632	73.008	0.6
14.6014	24.6674	73.0496	0.6
14.6097	24.705	73.0912	0.6
14.618	24.745	73.1328	0.6
14.6263	24.7856	73.1744	0.6
14.6346	24.8264	73.216	0.6
14.643	24.8675	73.2576	0.6
14.6513	24.9062	73.2992	0.6
14.6596	24.9441	73.3408	0.6
14.6679	24.986	73.3824	0.6
14.6762	25.0273	73.424	0.6
14.6845	25.0689	73.4656	0.6
14.6929	25.112	73.5072	0.6
14.7012	25.1565	73.5488	0.6
14.7095	25.2021	73.5904	0.6
14.7178	25.2472	73.632	0.6
14.7262	25.2926	73.6736	0.6
14.7345	25.3353	73.7152	0.6
14.7428	25.3764	73.7568	0.6
14.7511	25.4191	73.7984	0.6
14.7594	25.4607	73.84	0.6
14.7677	25.5033	73.8816	0.6
14.7761	25.5457	73.9232	0.6
14.7844	25.5882	73.9648	0.6
14.7927	25.6299	74.0064	0.6
14.801	25.6692	74.048	0.6
14.8094	25.7086	74.0896	0.6
14.8177	25.7475	74.1312	0.6
14.826	25.7904	74.1728	0.6
14.8343	25.8318	74.2144	0.6
14.8426	25.8746	74.256	0.6
14.8509	25.9173	74.2976	0.6
14.8593	25.9618	74.3392	0.6
14.8676	26.0073	74.3808	0.6
14.8759	26.0512	74.4224	0.6
14.8842	26.0918	74.464	0.6
14.8925	26.1339	74.5056	0.6
14.9009	26.1787	74.5472	0.6
14.9092	26.2226	74.5888	0.6
14.9175	26.2683	74.6304	0.6
14.9258	26.3121	74.672	0.6
14.9342	26.3545	74.7136	0.6
14.9425	26.3974	74.7552	0.6
14.9508	26.4407	74.7968	0.6
14.9591	26.4852	74.8384	0.6
14.9674	26.5258	74.88	0.6
14.9757	26.568	74.9216	0.6
14.9841	26.6144	74.9632	0.6
14.9924	26.6619	75.0048	0.6
15.0007	26.7061	75.0464	0.6
15.009	26.7475	75.088	0.6
15.0174	26.7905	75.1296	0.6
15.0257	26.8358	75.1712	0.6
15.034	26.8822	75.2128	0.6
15.0423	26.9289	75.2544	0.6
15.0506	26.9731	75.296	0.6
15.0589	27.0181	75.3376	0.6
15.0673	27.0627	75.3792	0.6
15.0756	27.1112	75.4208	0.6
15.0839	27.1552	75.4624	0.6
15.0922	27.2012	75.504	0.6
15.1006	27.246	75.5456	0.6
15.1089	27.2932	75.5872	0.6
15.1172	27.3424	75.6288	0.6
15.1255	27.3904	75.6704	0.6
15.1338	27.4358	75.712	0.6
15.1422	27.4814	75.7536	0.6
15.1505	27.5272	75.7952	0.6
15.1588	27.5756	75.8368	0.6
15.1671	27.6231	75.8784	0.6
15.1754	27.6694	75.92	0.6
15.1837	27.7181	75.9616	0.6
15.1921	27.7642	76.0032	0.6
15.2004	27.8124	76.0448	0.6
15.2087	27.86	76.0864	0.6
15.217	27.9095	76.128	0.6
15.2254	27.9542	76.1696	0.6
15.2337	28.0017	76.2112	0.6
15.242	28.0495	76.2528	0.6
15.2503	28.0959	76.2944	0.6
15.2586	28.1437	76.336	0.6
15.2669	28.1934	76.3776	0.6
15.2753	28.2414	76.4192	0.6
15.2836	28.2908	76.4608	0.6
15.2919	28.3408	76.5024	0.6
15.3002	28.3887	76.544	0.6
15.3085	28.4368	76.5856	0.6
15.3169	28.4875	76.6272	0.6
15.3252	28.5346	76.6688	0.6
15.3335	28.5797	76.7104	0.6
15.3418	28.6257	76.752	0.6
15.3501	28.6727	76.7936	0.6
15.3585	28.7219	76.8352	0.6
15.3668	28.7696	76.8768	0.6
15.3751	28.8164	76.9184	0.6
15.3834	28.865	76.96	0.6
15.3917	28.9099	77.0016	0.6
15.4001	28.9593	77.0432	0.6
15.4084	29.008	77.0848	0.6
15.4167	29.0565	77.1264	0.6
15.425	29.1023	77.168	0.6
15.4333	29.1514	77.2096	0.6
15.4417	29.2018	77.2512	0.6
15.45	29.2519	77.2928	0.6
15.4583	29.3017	77.3344	0.6
15.4666	29.3516	77.376	0.6
15.4749	29.3985	77.4176	0.6
15.4833	29.4463	77.4592	0.6
15.4916	29.4951	77.5008	0.6
15.4999	29.5442	77.5424	0.6
15.5082	29.5941	77.584	0.6
15.5165	29.6469	77.6256	0.6
15.5249	29.6961	77.6672	0.6
15.5332	29.7483	77.7088	0.6
15.5415	29.7972	77.7504	0.6
15.5498	29.8464	77.792	0.6
15.5581	29.8984	77.8336	0.6
15.5665	29.948	77.8752	0.6
15.5748	29.997	77.9168	0.6
15.5831	30.0484	77.9584	0.6
15.5914	30.1005	78	0.6
15.5997	30.1492	78.0416	0.6
15.6081	30.1967	78.0832	0.6
15.6164	30.2452	78.1248	0.6
15.6247	30.2957	78.1664	0.6
15.633	30.3484	78.208	0.6
15.6413	30.4003	78.2496	0.6
15.6497	30.4524	78.2912	0.6
15.658	30.5043	78.3328	0.6
15.6663	30.5562	78.3744	0.6
15.6746	30.6051	78.416	0.6
15.6829	30.6579	78.4576	0.6
15.6913	30.7068	78.4992	0.6
15.6996	30.7594	78.5408	0.6
15.7079	30.8098	78.5824	0.6
15.7162	30.8602	78.624	0.6
15.7245	30.9114	78.6656	0.6
15.7329	30.9623	78.7072	0.6
15.7412	31.0099	78.7488	0.6
15.7495	31.0586	78.7904	0.6
15.7578	31.1051	78.832	0.6
15.7661	31.1544	78.8736	0.6
15.7745	31.2066	78.9152	0.6
15.7828	31.2576	78.9568	0.6
15.7911	31.3109	78.9984	0.6
15.7994	31.3607	79.04	0.6
15.8077	31.412	79.0816	0.6
15.8161	31.4609	79.1232	0.6
15.8244	31.512	79.1648	0.6
15.8327	31.5613	79.2064	0.6
15.841	31.6141	79.248	0.6
15.8493	31.6681	79.2896	0.6
15.8576	31.7223	79.3312	0.6
15.866	31.7726	79.3728	0.6
15.8743	31.8222	79.4144	0.6
15.8826	31.8729	79.456	0.6
15.8909	31.9233	79.4976	0.6
15.8993	31.9716	79.5392	0.6
15.9076	32.0213	79.5808	0.6
15.9159	32.0718	79.6224	0.6
15.9242	32.1233	79.664	0.6
15.9325	32.1736	79.7056	0.6
15.9408	32.2223	79.7472	0.6
15.9492	32.2691	79.7888	0.6
15.9575	32.3178	79.8304	0.6
15.9658	32.3683	79.872	0.6
15.9741	32.4201	79.9136	0.6
15.9825	32.4683	79.9552	0.6
15.9908	32.515	79.9968	0.6
15.9991	32.5679	80.0384	0.6
16.0074	32.6194	80.08	0.6
16.0157	32.6678	80.1216	0.6
16.024	32.7165	80.1632	0.6
16.0324	32.7625	80.2048	0.6
16.0407	32.8155	80.2464	0.6
16.049	32.8665	80.288	0.6
16.0573	32.9157	80.3296	0.6
16.0657	32.9668	80.3712	0.6
16.074	33.0143	80.4128	0.6
16.0823	33.062	80.4544	0.6
16.0906	33.1122	80.496	0.6
16.0989	33.1614	80.5376	0.6
16.1073	33.2087	80.5792	0.6
16.1156	33.258	80.6208	0.6
16.1239	33.31	80.6624	0.6
16.1322	33.3616	80.704	0.6
16.1405	33.4106	80.7456	0.6
16.1488	33.4607	80.7872	0.605139
16.1572	33.5078	80.8288	0.615838
16.1655	33.5588	80.8704	0.627993
16.1738	33.6081	80.912	0.64015
16.1821	33.6565	80.9536	0.652324
16.1904	33.7055	80.9952	0.664495
16.1988	33.7527	81.0368	0.676647
16.2071	33.8005	81.0784	0.688807
16.2154	33.849	81.12	0.700988
16.2237	33.8941	81.1616	0.71316
16.2321	33.9403	81.2032	0.725323
16.2404	33.9899	81.2448	0.737474
16.2487	34.0375	81.2864	0.74963
16.257	34.0843	81.328	0.761809
16.2653	34.1328	81.3696	0.773979
16.2736	34.1789	81.4112	0.786134
16.282	34.2275	81.4528	0.798291
16.2903	34.2758	81.4944	0.810466
16.2986	34.3242	81.536	0.822635
16.3069	34.3727	81.5776	0.834786
16.3152	34.4187	81.6192	0.846948
16.3236	34.468	81.6608	0.859127
16.3319	34.5168	81.7024	0.871301
16.3402	34.5633	81.744	0.883465
16.3485	34.608	81.7856	0.895613
16.3569	34.6543	81.8272	0.90777
16.3652	34.7026	81.8688	0.919945
16.3735	34.7478	81.9104	0.932117
16.3818	34.7938	81.952	0.944275
16.3901	34.8383	81.9936	0.956429
16.3985	34.8869	82.0352	0.968607
16.4068	34.9302	82.0768	0.98078
16.4151	34.9773	82.1184	0.99293
16.4234	35.0239	82.16	1.00509
16.4317	35.0681	82.2016	1.01726
16.44	35.1132	82.2432	1.02944
16.4484	35.1599	82.2848	1.0416
16.4567	35.2065	82.3264	1.05375
16.465	35.2504	82.368	1.06591
16.4733	35.2955	82.4096	1.07809
16.4816	35.3382	82.4512	1.09027
16.49	35.3826	82.4928	1.10242
16.4983	35.4257	82.5344	1.11457
16.5066	35.4676	82.576	1.12675
16.5149	35.5134	82.6176	1.13892
16.5232	35.5554	82.6592	1.15108
16.5316	35.5954	82.7008	1.16323
16.5399	35.6418	82.7424	1.17541
16.5482	35.6825	82.784	1.18758
16.5565	35.7239	82.8256	1.19974
16.5648	35.7658	82.8672	1.2119
16.5732	35.8113	82.9088	1.22405
16.5815	35.8535	82.9504	1.23623
16.5898	35.8987	82.992	1.2484
16.5981	35.9443	83.0336	1.26056
16.6064	35.9878	83.0752	1.27271
16.6148	36.0269	83.1168	1.28488
16.6231	36.066	83.1584	1.29706
[truncated: 28,108 more rows]

## Sheet: AIEX
Volume (mL)	Abs 280 nm (mAU)	Volume (mL)	%B
0.001	-0.01821	0.012	0
0.002	-0.01786	0.029	0
0.004	-0.01734	0.045	0
0.006	-0.01686	0.062	0
0.007	-0.01648	0.078	0
0.009	-0.01686	0.095	0
0.011	-0.01742	0.112	0
0.012	-0.01798	0.128	0
0.014	-0.01853	0.145	0
0.016	-0.01897	0.162	0
0.017	-0.01905	0.178	0
0.019	-0.01914	0.195	0
0.02	-0.01922	0.212	0
0.022	-0.0195	0.228	0
0.024	-0.02109	0.245	0
0.025	-0.02321	0.261	0
0.027	-0.02533	0.278	0
0.029	-0.02738	0.295	0
0.03	-0.0287	0.311	0
0.032	-0.02792	0.328	0
0.034	-0.02715	0.345	0
0.035	-0.0264	0.361	0
0.037	-0.02569	0.378	0
0.039	-0.02578	0.394	0
0.04	-0.02621	0.411	0
0.042	-0.02664	0.428	0
0.044	-0.02706	0.444	0
0.045	-0.02731	0.461	0
0.047	-0.02631	0.478	0
0.049	-0.02531	0.494	0
0.05	-0.0243	0.511	0
0.052	-0.02335	0.527	0
0.054	-0.02315	0.544	0
0.055	-0.02337	0.561	0
0.057	-0.02359	0.577	0
0.059	-0.02382	0.594	0
0.06	-0.02406	0.611	0
0.062	-0.0244	0.627	0
0.064	-0.02475	0.644	0
0.065	-0.02509	0.661	0
0.067	-0.02542	0.677	0
0.069	-0.02551	0.694	0
0.07	-0.02545	0.71	0
0.072	-0.0254	0.727	0
0.074	-0.02534	0.744	0
0.075	-0.02529	0.76	0
0.077	-0.02515	0.777	0
0.079	-0.02498	0.794	0
0.08	-0.02481	0.81	0
0.082	-0.02464	0.827	0
0.084	-0.02444	0.843	0
0.085	-0.02443	0.86	0
0.087	-0.02441	0.877	0
0.089	-0.02439	0.893	0
0.09	-0.02437	0.91	0
0.092	-0.02396	0.927	0
0.094	-0.02348	0.943	0
0.095	-0.023	0.96	0
0.097	-0.02252	0.976	0
0.099	-0.02184	0.993	0
0.1	-0.02107	1.01	0
0.102	-0.02029	1.026	0
0.104	-0.01952	1.043	0
0.105	-0.01877	1.06	0
0.107	-0.01769	1.076	0
0.109	-0.01638	1.093	0
0.11	-0.01507	1.109	0
0.112	-0.01376	1.126	0
0.114	-0.01292	1.143	0
0.115	-0.01298	1.159	0
0.117	-0.01305	1.176	0
0.119	-0.01312	1.193	0
0.12	-0.01318	1.209	0
0.122	-0.01315	1.226	0
0.124	-0.01311	1.243	0
0.125	-0.01306	1.259	0
0.127	-0.01301	1.276	0
0.129	-0.0128	1.292	0
0.13	-0.01307	1.309	0
0.132	-0.01335	1.326	0
0.134	-0.01364	1.342	0
0.135	-0.01405	1.359	0
0.137	-0.01474	1.376	0
0.139	-0.01534	1.392	0
0.14	-0.01594	1.409	0
0.142	-0.01652	1.425	0
0.144	-0.01657	1.442	0
0.145	-0.01568	1.459	0
0.147	-0.0147	1.475	0
0.148	-0.01372	1.492	0
0.15	-0.01288	1.509	0
0.152	-0.01288	1.525	0
0.153	-0.01314	1.542	0
0.155	-0.01342	1.558	0
0.157	-0.0137	1.575	0
0.158	-0.01387	1.592	0
0.16	-0.0139	1.608	0
0.162	-0.01391	1.625	0
0.163	-0.01391	1.642	0
0.165	-0.01405	1.658	0
0.167	-0.0147	1.675	0
0.168	-0.01556	1.692	0
0.17	-0.01644	1.708	0
0.172	-0.01731	1.725	0
0.173	-0.01855	1.741	0
0.175	-0.01965	1.758	0
0.177	-0.02075	1.775	0
0.178	-0.02183	1.791	0
0.18	-0.02254	1.808	0
0.182	-0.02282	1.825	0
0.183	-0.02327	1.841	0
0.185	-0.02375	1.858	0
0.187	-0.02422	1.874	0
0.188	-0.02467	1.891	0
0.19	-0.02492	1.908	0
0.192	-0.02515	1.924	0
0.193	-0.02537	1.941	0
0.195	-0.02599	1.958	0
0.197	-0.02657	1.974	0
0.198	-0.02702	1.991	0
0.2	-0.02744	2.007	0
0.202	-0.02777	2.024	0
0.203	-0.02728	2.041	0
0.205	-0.02666	2.057	0
0.207	-0.02605	2.074	0
0.208	-0.02544	2.091	0
0.21	-0.02492	2.107	0
0.212	-0.02465	2.124	0
0.213	-0.02457	2.141	0
0.215	-0.02452	2.157	0
0.217	-0.02455	2.174	0
0.218	-0.02468	2.19	0
0.22	-0.0244	2.207	0
0.222	-0.02403	2.224	0
0.223	-0.02367	2.24	0
0.225	-0.02325	2.257	0
0.227	-0.02323	2.274	0
0.228	-0.02359	2.29	0
0.23	-0.02401	2.307	0
0.232	-0.02439	2.323	0
0.233	-0.0245	2.34	0
0.235	-0.02405	2.357	0
0.237	-0.02347	2.373	0
0.238	-0.0229	2.39	0
0.24	-0.02284	2.407	0
0.242	-0.02352	2.423	0
0.243	-0.02436	2.44	0
0.245	-0.02522	2.456	0
0.247	-0.02597	2.473	0
0.248	-0.02575	2.49	0
0.25	-0.02514	2.506	0
0.252	-0.02447	2.523	0
0.253	-0.0238	2.54	0
0.255	-0.02327	2.556	0
0.257	-0.02258	2.573	0
0.258	-0.02179	2.589	0
0.26	-0.02099	2.606	0
0.262	-0.0202	2.623	0
0.263	-0.01981	2.639	0
0.265	-0.02003	2.656	0
0.267	-0.02042	2.673	0
0.268	-0.02082	2.689	0
0.27	-0.02135	2.706	0
0.272	-0.02199	2.723	0
0.273	-0.02264	2.739	0
0.275	-0.02329	2.756	0
0.277	-0.02399	2.772	0
0.278	-0.02447	2.789	0
0.28	-0.02464	2.806	0
0.281	-0.02474	2.822	0
0.283	-0.02483	2.839	0
0.285	-0.02479	2.856	0
0.286	-0.02539	2.872	0
0.288	-0.02623	2.889	0
0.29	-0.02707	2.905	0
0.291	-0.0279	2.922	0
0.293	-0.02865	2.939	0
0.295	-0.02932	2.955	0
0.296	-0.02997	2.972	0
0.298	-0.03063	2.989	0
0.3	-0.03179	3.005	0
0.301	-0.03296	3.022	0
0.303	-0.03404	3.038	0
0.305	-0.03514	3.055	0
0.306	-0.03595	3.072	0
0.308	-0.03645	3.088	0
0.31	-0.03689	3.105	0
0.311	-0.03734	3.122	0
0.313	-0.03778	3.138	0
0.315	-0.03772	3.155	0
0.316	-0.03753	3.172	0
0.318	-0.03739	3.188	0
0.32	-0.03726	3.205	0
0.321	-0.03737	3.221	0
0.323	-0.03736	3.238	0
0.325	-0.03678	3.255	0
0.326	-0.03599	3.271	0
0.328	-0.03511	3.288	0
0.33	-0.03394	3.305	0
0.331	-0.03335	3.321	0
0.333	-0.03311	3.338	0
0.335	-0.03287	3.354	0
0.336	-0.03269	3.371	0
0.338	-0.03241	3.388	0
0.34	-0.03199	3.404	0
0.341	-0.03152	3.421	0
0.343	-0.03104	3.438	0
0.345	-0.03051	3.454	0
0.346	-0.02991	3.471	0
0.348	-0.02928	3.487	0
0.35	-0.02865	3.504	0
0.351	-0.02815	3.521	0
0.353	-0.02759	3.537	0
0.355	-0.02695	3.554	0
0.356	-0.02632	3.571	0
0.358	-0.02568	3.587	0
0.36	-0.02502	3.604	0
0.361	-0.02426	3.621	0
0.363	-0.02344	3.637	0
0.365	-0.02265	3.654	0
0.366	-0.02212	3.67	0
0.368	-0.02193	3.687	0
0.37	-0.02187	3.704	0
0.371	-0.02182	3.72	0
0.373	-0.02138	3.737	0
0.375	-0.02051	3.754	0
0.376	-0.01955	3.77	0
0.378	-0.01859	3.787	0
0.38	-0.01762	3.803	0
0.381	-0.0166	3.82	0
0.383	-0.01506	3.837	0
0.385	-0.01321	3.853	0
0.386	-0.01135	3.87	0
0.388	-0.00944	3.887	0
0.39	-0.00764	3.903	0
0.391	-0.00611	3.92	0
0.393	-0.00471	3.936	0
0.395	-0.0033	3.953	0
0.396	-0.00215	3.97	0
0.398	-0.00168	3.986	0
0.4	-0.00155	4.003	0
0.401	-0.00143	4.02	0
0.403	-0.00155	4.036	0
0.405	-0.00186	4.053	0
0.406	-0.00204	4.069	0
0.408	-0.00212	4.086	0
0.409	-0.0022	4.103	0
0.411	-0.00187	4.119	0
0.413	-0.00145	4.136	0
0.414	-0.00127	4.153	0
0.416	-0.00108	4.169	0
0.418	-0.00106	4.186	0
0.419	-0.00124	4.203	0
0.421	-0.00147	4.219	0
0.423	-0.00169	4.236	0
0.424	-0.00197	4.252	0
0.426	-0.00255	4.269	0
0.428	-0.00337	4.286	0
0.429	-0.00421	4.302	0
0.431	-0.00505	4.319	0
0.433	-0.0056	4.336	0
0.434	-0.00571	4.352	0
0.436	-0.00565	4.369	0
0.438	-0.00559	4.385	0
0.439	-0.00558	4.402	0
0.441	-0.00574	4.419	0
0.443	-0.00601	4.435	0
0.444	-0.00627	4.452	0
0.446	-0.00653	4.469	0
0.448	-0.00672	4.485	0
0.449	-0.00662	4.502	0
0.451	-0.00631	4.518	0
0.453	-0.00599	4.535	0
0.454	-0.00567	4.552	0
0.456	-0.00562	4.568	0
0.458	-0.00599	4.585	0
0.459	-0.0065	4.602	0
0.461	-0.00701	4.618	0
0.463	-0.00733	4.635	0
0.464	-0.0074	4.652	0
0.466	-0.00744	4.668	0
0.468	-0.00748	4.685	0
0.469	-0.00764	4.701	0
0.471	-0.00829	4.718	0
0.473	-0.00945	4.735	0
0.474	-0.01071	4.751	0
0.476	-0.01198	4.768	0
0.478	-0.01335	4.785	0
0.479	-0.01467	4.801	0
0.481	-0.01573	4.818	0
0.483	-0.01677	4.834	0
0.484	-0.01769	4.851	0
0.486	-0.01814	4.868	0
0.488	-0.01802	4.884	0
0.489	-0.01766	4.901	0
0.491	-0.01731	4.918	0
0.493	-0.01713	4.934	0
0.494	-0.01757	4.951	0
0.496	-0.01851	4.967	0
0.498	-0.01946	4.984	0
0.499	-0.02039	5.001	0
0.501	-0.02114	5.017	0
0.503	-0.02163	5.034	0
0.504	-0.02199	5.051	0
0.506	-0.02233	5.067	0
0.508	-0.02245	5.084	0
0.509	-0.02216	5.101	0
0.511	-0.02161	5.117	0
0.513	-0.02106	5.134	0
0.514	-0.02041	5.15	0
0.516	-0.01982	5.167	0
0.518	-0.01958	5.184	0
0.519	-0.01942	5.2	0
0.521	-0.01927	5.217	0
0.523	-0.01914	5.234	0
0.524	-0.0189	5.25	0
0.526	-0.0185	5.267	0
0.528	-0.01811	5.283	0
0.529	-0.01768	5.3	0
0.531	-0.01723	5.317	0
0.533	-0.01686	5.333	0
0.534	-0.0165	5.35	0
0.536	-0.01623	5.367	0
0.538	-0.01622	5.383	0
0.539	-0.01647	5.4	0
0.541	-0.01677	5.416	0
0.542	-0.01707	5.433	0
0.544	-0.01783	5.45	0
0.546	-0.01959	5.466	0
0.547	-0.02176	5.483	0
0.549	-0.02404	5.5	0
0.551	-0.026	5.516	0
0.552	-0.02692	5.533	0
0.554	-0.02684	5.549	0
0.556	-0.02632	5.566	0
0.557	-0.02583	5.583	0
0.559	-0.0255	5.599	0
0.561	-0.02535	5.616	0
0.562	-0.02504	5.633	0
0.564	-0.02471	5.649	0
0.566	-0.02421	5.666	0
0.567	-0.02336	5.683	0
0.569	-0.02265	5.699	0
0.571	-0.02213	5.716	0
0.572	-0.02172	5.732	0
0.574	-0.02178	5.749	0
0.576	-0.02228	5.766	0
0.577	-0.0225	5.782	0
0.579	-0.02271	5.799	0
0.581	-0.02264	5.816	0
0.582	-0.02183	5.832	0
0.584	-0.02099	5.849	0
0.586	-0.02017	5.865	0
0.587	-0.019	5.882	0
0.589	-0.01659	5.899	0
0.591	-0.01343	5.915	0
0.592	-0.01049	5.932	0
0.594	-0.00754	5.949	0
0.596	-0.00513	5.965	0
0.597	-0.00426	5.982	0
0.599	-0.00373	5.998	0
0.601	-0.00324	6.015	0
0.602	-0.00265	6.032	0
0.604	-0.00166	6.048	0
0.606	-0.00033	6.065	0
0.607	0.001049	6.082	0
0.609	0.002433	6.098	0
0.611	0.003782	6.115	0
0.612	0.005037	6.132	0
0.614	0.006234	6.148	0
0.616	0.007422	6.165	0
0.617	0.008585	6.181	0
0.619	0.009736	6.198	0
0.621	0.011087	6.215	0
0.622	0.012682	6.231	0
0.624	0.014291	6.248	0
0.626	0.016074	6.265	0
0.627	0.018579	6.281	0
0.629	0.022098	6.298	0
0.631	0.02572	6.314	0
0.632	0.029281	6.331	0
0.634	0.032355	6.348	0
0.636	0.034397	6.364	0
0.637	0.035709	6.381	0
0.639	0.037114	6.398	0
0.641	0.039081	6.414	0
0.642	0.041959	6.431	0
0.644	0.045143	6.447	0
0.646	0.048333	6.464	0
0.647	0.051476	6.481	0
0.649	0.054325	6.497	0
0.651	0.056588	6.514	0
0.652	0.05867	6.531	0
0.654	0.060754	6.547	0
0.656	0.062966	6.564	0
0.657	0.065768	6.581	0
0.659	0.069217	6.597	0
0.661	0.072671	6.614	0
0.662	0.076152	6.63	0
0.664	0.079588	6.647	0
0.666	0.082329	6.664	0
0.667	0.08499	6.68	0
0.669	0.087644	6.697	0
0.671	0.090038	6.714	0
0.672	0.091169	6.73	0
0.674	0.091298	6.747	0
0.675	0.091428	6.763	0
0.677	0.091601	6.78	0
0.679	0.092265	6.797	0
0.68	0.094709	6.813	0
0.682	0.097343	6.83	0
0.684	0.099986	6.847	0
0.685	0.102674	6.863	0
0.687	0.105153	6.88	0
0.689	0.107301	6.896	0
0.69	0.109448	6.913	0
0.692	0.11155	6.93	0
0.694	0.113379	6.946	0
0.695	0.11517	6.963	0
0.697	0.116965	6.98	0
0.699	0.11878	6.996	0
0.7	0.120816	7.013	0
0.702	0.123755	7.03	0
0.704	0.126738	7.046	0
0.705	0.129732	7.063	0
0.707	0.132629	7.079	0
0.709	0.134812	7.096	0
0.71	0.136229	7.113	0
0.712	0.137643	7.129	0
0.714	0.139063	7.146	0
0.715	0.140597	7.163	0
0.717	0.142698	7.179	0
0.719	0.144927	7.196	0
0.72	0.147154	7.212	0
0.722	0.149387	7.229	0
0.724	0.151584	7.246	0
0.725	0.153317	7.262	0
0.727	0.155047	7.279	0
0.729	0.156774	7.296	0
0.73	0.158358	7.312	0
0.732	0.159467	7.329	0
0.734	0.16074	7.345	0
0.735	0.162016	7.362	0
0.737	0.163339	7.379	0
0.739	0.165339	7.395	0
0.74	0.167781	7.412	0
0.742	0.170224	7.429	0
0.744	0.172657	7.445	0
0.745	0.174888	7.462	0
0.747	0.175892	7.478	0
0.749	0.176747	7.495	0
0.75	0.1776	7.512	0
0.752	0.178473	7.528	0
0.754	0.179681	7.545	0
0.755	0.181114	7.562	0
0.757	0.182556	7.578	0
0.759	0.183994	7.595	0
0.76	0.185413	7.612	0
0.762	0.186577	7.628	0
0.764	0.187642	7.645	0
0.765	0.18871	7.661	0
0.767	0.189811	7.678	0
0.769	0.191587	7.695	0
0.77	0.193673	7.711	0
0.772	0.195756	7.728	0
0.774	0.197831	7.745	0
0.775	0.199733	7.761	0
0.777	0.200782	7.778	0
0.779	0.201962	7.794	0
0.78	0.203148	7.811	0
0.782	0.204333	7.828	0
0.784	0.205543	7.844	0
0.785	0.205898	7.861	0
0.787	0.206261	7.878	0
0.789	0.206628	7.894	0
0.79	0.206754	7.911	0
0.792	0.206484	7.927	0
0.794	0.206586	7.944	0
0.795	0.206691	7.961	0
0.797	0.206797	7.977	0
0.799	0.206552	7.994	0
0.8	0.205905	8.011	0
0.802	0.205252	8.027	0
0.803	0.204599	8.044	0
0.805	0.204579	8.061	0
0.807	0.205056	8.077	0
0.808	0.205078	8.094	0
0.81	0.205091	8.11	0
0.812	0.205105	8.127	0
0.813	0.203663	8.144	0
0.815	0.202499	8.16	0
0.817	0.201343	8.177	0
0.818	0.200192	8.194	0
0.82	0.199687	8.21	0
0.822	0.199515	8.227	0
0.823	0.198683	8.243	0
0.825	0.197832	8.26	0
0.827	0.196977	8.277	0
0.828	0.195382	8.293	0
0.83	0.194763	8.31	0
0.832	0.194181	8.327	0
0.833	0.193597	8.343	0
0.835	0.193301	8.36	0
0.837	0.193125	8.376	0
0.838	0.192746	8.393	0
0.84	0.192359	8.41	0
0.842	0.191965	8.426	0
0.843	0.191559	8.443	0
0.845	0.191175	8.46	0
0.847	0.190794	8.476	0
0.848	0.190413	8.493	0
0.85	0.189854	8.51	0
0.852	0.188296	8.526	0
0.853	0.186164	8.543	0
0.855	0.183992	8.559	0
0.857	0.181819	8.576	0
0.858	0.180414	8.593	0
0.86	0.180205	8.609	0
0.862	0.180108	8.626	0
0.863	0.180011	8.643	0
0.865	0.179843	8.659	0
0.867	0.179415	8.676	0
0.868	0.178895	8.692	0
0.87	0.178372	8.709	0
0.872	0.17785	8.726	0
0.873	0.177503	8.742	0
0.875	0.178028	8.759	0
0.877	0.178666	8.776	0
0.878	0.179306	8.792	0
0.88	0.179977	8.809	0
0.882	0.180986	8.825	0
0.883	0.182111	8.842	0
0.885	0.183246	8.859	0
0.887	0.184379	8.875	0
0.888	0.185007	8.892	0
0.89	0.184727	8.909	0
0.892	0.184326	8.925	0
0.893	0.183931	8.942	0
0.895	0.183648	8.958	0
0.897	0.184962	8.975	0
0.898	0.186936	8.992	0
0.9	0.188986	9.008	0
0.902	0.191033	9.025	0
0.903	0.192845	9.042	0
0.905	0.193859	9.058	0
0.907	0.194703	9.075	0
0.908	0.19555	9.092	0
0.91	0.19625	9.108	0
0.912	0.197295	9.125	0
0.913	0.198508	9.141	0
0.915	0.199742	9.158	0
0.917	0.200979	9.175	0
0.918	0.2016	9.191	0
0.92	0.201558	9.208	0
0.922	0.20139	9.225	0
0.923	0.201221	9.241	0
0.925	0.201152	9.258	0
0.927	0.20135	9.274	0
0.928	0.201611	9.291	0
0.93	0.201871	9.308	0
0.932	0.202132	9.324	0
0.933	0.202578	9.341	0
0.935	0.203314	9.358	0
0.936	0.204108	9.374	0
0.938	0.204905	9.391	0
0.94	0.205595	9.407	0
0.941	0.205539	9.424	0
0.943	0.205292	9.441	0
0.945	0.205047	9.457	0
0.946	0.204808	9.474	0
0.948	0.204935	9.491	0
0.95	0.205271	9.507	0
0.951	0.205638	9.524	0
0.953	0.206004	9.541	0
0.955	0.206215	9.557	0
0.956	0.206298	9.574	0
0.958	0.206359	9.59	0
0.96	0.206421	9.607	0
0.961	0.206456	9.624	0
0.963	0.206212	9.64	0
0.965	0.205831	9.657	0
0.966	0.205436	9.674	0
0.968	0.20504	9.69	0
0.97	0.205023	9.707	0
0.971	0.205259	9.723	0
0.973	0.205532	9.74	0
0.975	0.205803	9.757	0
0.976	0.206209	9.773	0
0.978	0.207095	9.79	0
0.98	0.207896	9.807	0
0.981	0.208602	9.823	0
0.983	0.20931	9.84	0
0.985	0.210397	9.856	0
0.986	0.211516	9.873	0
0.988	0.212524	9.89	0
0.99	0.213505	9.906	0
0.991	0.214133	9.923	0
0.993	0.213355	9.94	0
0.995	0.212378	9.956	0
0.996	0.211521	9.973	0
0.998	0.210665	9.99	0
1	0.210155	10.006	0
1.001	0.210221	10.023	0
1.003	0.210631	10.039	0
1.005	0.211107	10.056	0
1.006	0.211773	10.073	0
1.008	0.213204	10.089	0
1.01	0.214788	10.106	0
1.011	0.216276	10.123	0
1.013	0.217763	10.139	0
1.015	0.219139	10.156	0
1.016	0.220411	10.172	0
1.018	0.221652	10.189	0
1.02	0.222889	10.206	0
1.021	0.224098	10.222	0
1.023	0.225336	10.239	0
1.025	0.226733	10.256	0
1.026	0.228202	10.272	0
1.028	0.229664	10.289	0
1.03	0.231038	10.305	0
1.031	0.232066	10.322	0
1.033	0.232932	10.339	0
1.035	0.233802	10.355	0
1.036	0.23477	10.372	0
1.038	0.236154	10.389	0
1.04	0.237828	10.405	0
1.041	0.239553	10.422	0
1.043	0.241275	10.438	0
1.045	0.243358	10.455	0
1.046	0.245891	10.472	0
1.048	0.248558	10.488	0
1.05	0.251226	10.505	0
1.051	0.253835	10.522	0
1.053	0.255887	10.538	0
1.055	0.25755	10.555	0
1.056	0.259152	10.572	0
1.058	0.260755	10.588	0
1.06	0.262365	10.605	0
1.061	0.263593	10.621	0
1.063	0.26455	10.638	0
1.064	0.265509	10.655	0
1.066	0.266692	10.671	0
1.068	0.268247	10.688	0
1.069	0.26982	10.705	0
1.071	0.2713	10.721	0
1.073	0.272779	10.738	0
1.074	0.274277	10.754	0
1.076	0.276815	10.771	0
1.078	0.280094	10.788	0
1.079	0.283368	10.804	0
1.081	0.286609	10.821	0
1.083	0.289484	10.838	0
1.084	0.291989	10.854	0
1.086	0.294394	10.871	0
1.088	0.296788	10.887	0
1.089	0.29971	10.904	0
1.091	0.302519	10.921	0
1.093	0.304974	10.937	0
1.094	0.307429	10.954	0
1.096	0.309777	10.971	0
1.098	0.311905	10.987	0
1.099	0.313945	11.004	0
1.101	0.316004	11.021	0
1.103	0.318067	11.037	0
1.104	0.320243	11.054	0
1.106	0.322507	11.07	0
1.108	0.324805	11.087	0
1.109	0.327139	11.104	0
1.111	0.329613	11.12	0
1.113	0.332474	11.137	0
1.114	0.335597	11.154	0
1.116	0.338736	11.17	0
1.118	0.341878	11.187	0
1.119	0.345183	11.203	0
1.121	0.348441	11.22	0
1.123	0.351524	11.237	0
1.124	0.354616	11.253	0
1.126	0.357795	11.27	0
1.128	0.36086	11.287	0
1.129	0.363714	11.303	0
1.131	0.366546	11.32	0
1.133	0.369377	11.336	0
1.134	0.372242	11.353	0
1.136	0.375249	11.37	0
1.138	0.378375	11.386	0
1.139	0.381528	11.403	0
1.141	0.384834	11.42	0
1.143	0.388449	11.436	0
1.144	0.392175	11.453	0
1.146	0.39586	11.47	0
1.148	0.399546	11.486	0
1.149	0.403734	11.503	0
1.151	0.408059	11.519	0
1.153	0.412028	11.536	0
1.154	0.415993	11.553	0
1.156	0.419826	11.569	0
1.158	0.423631	11.586	0
1.159	0.427573	11.603	0
1.161	0.431587	11.619	0
1.163	0.435659	11.636	0
1.164	0.440426	11.652	0
1.166	0.446064	11.669	0
1.168	0.451786	11.686	0
1.169	0.4575	11.702	0
1.171	0.463207	11.719	0
1.173	0.468371	11.736	0
1.174	0.472743	11.752	0
1.176	0.476953	11.769	0
1.178	0.481158	11.785	0
1.179	0.486002	11.802	0
1.181	0.491826	11.819	0
1.183	0.49788	11.835	0
1.184	0.503938	11.852	0
1.186	0.510268	11.869	0
1.188	0.517123	11.885	0
1.189	0.524219	11.902	0
1.191	0.531276	11.919	0
1.193	0.538337	11.935	0
1.194	0.545998	11.952	0
1.196	0.554277	11.968	0
1.197	0.562347	11.985	0
1.199	0.570413	12.002	0
1.201	0.578211	12.018	0
1.202	0.585161	12.035	0
1.204	0.591458	12.052	0
1.206	0.597759	12.068	0
1.207	0.604045	12.085	0
1.209	0.610904	12.101	0
1.211	0.618501	12.118	0
1.212	0.625948	12.135	0
1.214	0.633296	12.151	0
1.216	0.640936	12.168	0
1.217	0.649323	12.185	0
1.219	0.658043	12.201	0
1.221	0.666758	12.218	0
1.222	0.675384	12.234	0
1.224	0.683495	12.251	0
1.226	0.690698	12.268	0
1.227	0.697582	12.284	0
1.229	0.704472	12.301	0
1.231	0.711993	12.318	0
1.232	0.720477	12.334	0
1.234	0.7285	12.351	0
1.236	0.7364	12.367	0
1.237	0.744366	12.384	0
1.239	0.752916	12.401	0
1.241	0.762489	12.417	0
1.242	0.772268	12.434	0
1.244	0.782037	12.451	0
1.246	0.792337	12.467	0
1.247	0.803389	12.484	0
1.249	0.813951	12.501	0
1.251	0.824525	12.517	0
1.252	0.835193	12.534	0
1.254	0.846508	12.55	0
1.256	0.858625	12.567	0
1.257	0.870769	12.584	0
1.259	0.882939	12.6	0
1.261	0.895378	12.617	0
1.262	0.908059	12.634	0
1.264	0.920143	12.65	0
1.266	0.932237	12.667	0
1.267	0.944263	12.683	0
1.269	0.956695	12.7	0
1.271	0.969846	12.717	0
1.272	0.982574	12.733	0
1.274	0.995301	12.75	0
1.276	1.00815	12.767	0
1.277	1.02091	12.783	0
1.279	1.03265	12.8	0
1.281	1.04441	12.816	0
1.282	1.05624	12.833	0
1.284	1.06881	12.85	0
1.286	1.08315	12.866	0
1.287	1.09798	12.883	0
1.289	1.11276	12.9	0
1.291	1.12787	12.916	0
1.292	1.14365	12.933	0
1.294	1.15912	12.95	0
1.296	1.17459	12.966	0
1.297	1.19012	12.983	0
1.299	1.20614	12.999	0
1.301	1.22306	13.016	0
1.302	1.23958	13.033	0
1.304	1.25614	13.049	0
1.306	1.27314	13.066	0
1.307	1.29163	13.083	0
1.309	1.31115	13.099	0
1.311	1.33063	13.116	0
1.312	1.35018	13.132	0
1.314	1.36946	13.149	0
1.316	1.38792	13.166	0
1.317	1.40587	13.182	0
1.319	1.42382	13.199	0
1.321	1.44176	13.216	0
1.322	1.45984	13.232	0
1.324	1.47801	13.249	0
1.325	1.49619	13.265	0
1.327	1.51442	13.282	0
1.329	1.53338	13.299	0
1.33	1.5537	13.315	0
1.332	1.57344	13.332	0
1.334	1.59322	13.349	0
1.335	1.6132	13.365	0
1.337	1.63364	13.382	0
1.339	1.65352	13.399	0
1.34	1.67343	13.415	0
1.342	1.6934	13.432	0
1.344	1.71412	13.448	0
1.345	1.73545	13.465	0
1.347	1.75644	13.482	0
1.349	1.77745	13.498	0
1.35	1.79879	13.515	0
1.352	1.82156	13.532	0
1.354	1.84349	13.548	0
1.355	1.86533	13.565	0
1.357	1.88731	13.581	0
1.359	1.90982	13.598	0
1.36	1.93262	13.615	0
1.362	1.95515	13.631	0
1.364	1.9777	13.648	0
1.365	2.0006	13.665	0
1.367	2.02466	13.681	0
1.369	2.0476	13.698	0
1.37	2.07045	13.714	0
1.372	2.09342	13.731	0
1.374	2.11667	13.748	0
1.375	2.13944	13.764	0
1.377	2.16196	13.781	0
1.379	2.18458	13.798	0
1.38	2.20743	13.814	0
1.382	2.23187	13.831	0
1.384	2.25509	13.847	0
1.385	2.27821	13.864	0
1.387	2.30144	13.881	0
1.389	2.32529	13.897	0
1.39	2.349	13.914	0
1.392	2.37228	13.931	0
1.394	2.39548	13.947	0
1.395	2.41888	13.964	0
1.397	2.44293	13.981	0
1.399	2.46667	13.997	0
1.4	2.49035	14.014	0
1.402	2.51417	14.03	0
1.404	2.53859	14.047	0
1.405	2.56527	14.064	0
1.407	2.5915	14.08	0
1.409	2.61766	14.097	0
1.41	2.64402	14.114	0
1.412	2.67141	14.13	0
1.414	2.6964	14.147	0
1.415	2.7214	14.163	0
1.417	2.74645	14.18	0
1.419	2.77189	14.197	0
1.42	2.79717	14.213	0
1.422	2.822	14.23	0
1.424	2.84684	14.247	0
1.425	2.87177	14.263	0
1.427	2.89747	14.28	0
1.429	2.92103	14.296	0
1.43	2.94536	14.313	0
1.432	2.96981	14.33	0
1.434	2.99503	14.346	0
1.435	3.01965	14.363	0
1.437	3.04412	14.38	0
1.439	3.06857	14.396	0
1.44	3.09309	14.413	0
1.442	3.11815	14.43	0
1.444	3.14301	14.446	0
1.445	3.16788	14.463	0
1.447	3.19287	14.479	0
1.449	3.21852	14.496	0
1.45	3.24566	14.513	0
1.452	3.27255	14.529	0
1.454	3.29943	14.546	0
1.455	3.32634	14.563	0
1.457	3.35398	14.579	0
1.458	3.3805	14.596	0
1.46	3.40695	14.612	0
1.462	3.43365	14.629	0
1.463	3.46183	14.646	0
1.465	3.49025	14.662	0
1.467	3.51808	14.679	0
1.468	3.54609	14.696	0
1.47	3.57396	14.712	0
1.472	3.60183	14.729	0
1.473	3.62825	14.745	0
1.475	3.65468	14.762	0
1.477	3.68114	14.779	0
1.478	3.70885	14.795	0
1.48	3.7367	14.812	0
1.482	3.76326	14.829	0
1.483	3.79032	14.845	0
1.485	3.81767	14.862	0
1.487	3.84705	14.879	0
1.488	3.87286	14.895	0
1.49	3.89864	14.912	0
1.492	3.92431	14.928	0
1.493	3.9511	14.945	0
1.495	3.97691	14.962	0
1.497	4.00194	14.978	0
1.498	4.02689	14.995	0
1.5	4.05239	15.012	0
1.502	4.07931	15.028	0
1.503	4.1052	15.045	0
1.505	4.13108	15.061	0
1.507	4.15693	15.078	0
1.508	4.18342	15.095	0
1.51	4.20853	15.111	0
1.512	4.2333	15.128	0
1.513	4.25835	15.145	0
1.515	4.2843	15.161	0
1.517	4.31205	15.178	0
1.518	4.33803	15.194	0
1.52	4.36388	15.211	0
1.522	4.38978	15.228	0
1.523	4.41695	15.244	0
1.525	4.44311	15.261	0
1.527	4.46859	15.278	0
1.528	4.49401	15.294	0
1.53	4.52035	15.311	0
1.532	4.547	15.327	0
1.533	4.57059	15.344	0
1.535	4.59361	15.361	0
1.537	4.61656	15.377	0
1.538	4.64282	15.394	0
1.54	4.66836	15.411	0
1.542	4.69346	15.427	0
1.543	4.71861	15.444	0
1.545	4.74386	15.461	0
1.547	4.76769	15.477	0
1.548	4.78904	15.494	0
1.55	4.8101	15.51	0
1.552	4.83118	15.527	0
1.553	4.85298	15.544	0
1.555	4.87433	15.56	0
1.557	4.89564	15.577	0
1.558	4.91701	15.594	0
1.56	4.93995	15.61	0
1.562	4.96357	15.627	0
1.563	4.98618	15.643	0
1.565	5.00872	15.66	0
1.567	5.03117	15.677	0
1.568	5.05539	15.693	0
1.57	5.07756	15.71	0
1.572	5.09941	15.727	0
1.573	5.12136	15.743	0
1.575	5.14363	15.76	0
1.577	5.16528	15.776	0
1.578	5.186	15.793	0
1.58	5.20674	15.81	0
1.582	5.22756	15.826	0
1.583	5.24913	15.843	0
1.585	5.26911	15.86	0
1.587	5.28891	15.876	0
1.588	5.30846	15.893	0
1.59	5.32866	15.91	0
1.591	5.34953	15.926	0
1.593	5.37031	15.943	0
1.595	5.39107	15.959	0
1.596	5.41193	15.976	0
1.598	5.43292	15.993	0
1.6	5.45173	16.009	0
1.601	5.47006	16.026	0
1.603	5.48845	16.043	0
1.605	5.50816	16.059	0
1.606	5.52796	16.076	0
1.608	5.54758	16.092	0
1.61	5.56718	16.109	0
1.611	5.58684	16.126	0
1.613	5.60663	16.142	0
1.615	5.62549	16.159	0
1.616	5.64412	16.176	0
1.618	5.66273	16.192	0
1.62	5.68144	16.209	0
1.621	5.69774	16.225	0
1.623	5.71357	16.242	0
1.625	5.72941	16.259	0
1.626	5.74563	16.275	0
1.628	5.76341	16.292	0
1.63	5.78148	16.309	0
1.631	5.7995	16.325	0
1.633	5.81756	16.342	0
1.635	5.8358	16.359	0
1.636	5.85355	16.375	0
1.638	5.87113	16.392	0
1.64	5.88868	16.408	0
1.641	5.90626	16.425	0
1.643	5.92272	16.442	0
1.645	5.93796	16.458	0
1.646	5.95293	16.475	0
1.648	5.96788	16.492	0
1.65	5.98405	16.508	0
1.651	5.99989	16.525	0
1.653	6.01544	16.541	0
1.655	6.03098	16.558	0
1.656	6.04652	16.575	0
1.658	6.06212	16.591	0
1.66	6.07762	16.608	0
1.661	6.09305	16.625	0
1.663	6.10846	16.641	0
1.665	6.12411	16.658	0
1.666	6.1389	16.674	0
1.668	6.15339	16.691	0
1.67	6.16788	16.708	0
1.671	6.18239	16.724	0
1.673	6.19668	16.741	0
1.675	6.21034	16.758	0
1.676	6.2238	16.774	0
1.678	6.23726	16.791	0
1.68	6.25123	16.808	0
1.681	6.26543	16.824	0
1.683	6.27962	16.841	0
1.685	6.29381	16.857	0
1.686	6.30799	16.874	0
1.688	6.32228	16.891	0
1.69	6.33598	16.907	0
1.691	6.34943	16.924	0
1.693	6.36287	16.941	0
1.695	6.37631	16.957	0
1.696	6.38885	16.974	0
1.698	6.40132	16.99	0
1.7	6.41395	17.007	0
1.701	6.42657	17.024	0
1.703	6.43959	17.04	0
1.705	6.45272	17.057	0
1.706	6.46582	17.074	0
1.708	6.47891	17.09	0
1.71	6.49231	17.107	0
1.711	6.50502	17.123	0
1.713	6.51725	17.14	0
1.715	6.52951	17.157	0
1.716	6.54174	17.173	0
1.718	6.55359	17.19	0
1.719	6.5652	17.207	0
1.721	6.57678	17.223	0
1.723	6.58835	17.24	0
1.724	6.6	17.256	0
1.726	6.61137	17.273	0
1.728	6.62257	17.29	0
1.729	6.63375	17.306	0
1.731	6.64493	17.323	0
1.733	6.65555	17.34	0
1.734	6.66555	17.356	0
1.736	6.67534	17.373	0
1.738	6.68515	17.39	0
1.739	6.69532	17.406	0
1.741	6.70616	17.423	0
1.743	6.71725	17.439	0
1.744	6.72834	17.456	0
1.746	6.73947	17.473	0
1.748	6.75131	17.489	0
1.749	6.76324	17.506	0
1.751	6.77524	17.523	0
1.753	6.78745	17.539	0
1.754	6.79954	17.556	0
1.756	6.81101	17.572	0
1.758	6.82212	17.589	0
1.759	6.83323	17.606	0
1.761	6.84433	17.622	0
1.763	6.85528	17.639	0
1.764	6.86534	17.656	0
1.766	6.87484	17.672	0
1.768	6.88434	17.689	0
1.769	6.89387	17.705	0
1.771	6.90243	17.722	0
1.773	6.91013	17.739	0
1.774	6.91775	17.755	0
1.776	6.9255	17.772	0
1.778	6.93378	17.789	0
1.779	6.94232	17.805	0
1.781	6.9508	17.822	0
1.783	6.9593	17.839	0
1.784	6.96805	17.855	0
1.786	6.97681	17.872	0
1.788	6.9854	17.888	0
1.789	6.99401	17.905	0
1.791	7.00269	17.922	0
1.793	7.01149	17.938	0
1.794	7.02002	17.955	0
1.796	7.02828	17.972	0
1.798	7.03652	17.988	0
1.799	7.04452	18.005	0
1.801	7.05227	18.021	0
1.803	7.05986	18.038	0
1.804	7.06744	18.055	0
1.806	7.07514	18.071	0
1.808	7.08325	18.088	0
1.809	7.09157	18.105	0
1.811	7.09973	18.121	0
1.813	7.10788	18.138	0
1.814	7.11627	18.154	0
1.816	7.12467	18.171	0
1.818	7.13271	18.188	0
1.819	7.14067	18.204	0
1.821	7.14865	18.221	0
1.823	7.1565	18.238	0
1.824	7.16353	18.254	0
1.826	7.16989	18.271	0
1.828	7.17626	18.288	0
1.829	7.18293	18.304	0
1.831	7.18927	18.321	0
1.833	7.19489	18.337	0
1.834	7.20044	18.354	0
1.836	7.20598	18.371	0
1.838	7.21151	18.387	0
1.839	7.21718	18.404	0
1.841	7.22294	18.421	0
1.843	7.2287	18.437	0
1.844	7.23482	18.454	0
1.846	7.24104	18.47	0
1.848	7.24699	18.487	0
1.849	7.25293	18.504	0
1.851	7.25895	18.52	0
1.852	7.26511	18.537	0
1.854	7.27133	18.554	0
1.856	7.27746	18.57	0
1.857	7.28355	18.587	0
1.859	7.28982	18.603	0
1.861	7.29588	18.62	0
1.862	7.30144	18.637	0
1.864	7.30701	18.653	0
1.866	7.31269	18.67	0
1.867	7.31834	18.687	0
1.869	7.32358	18.703	0
1.871	7.32857	18.72	0
1.872	7.33359	18.736	0
1.874	7.3386	18.753	0
1.876	7.34315	18.77	0
1.877	7.34709	18.786	0
1.879	7.35101	18.803	0
1.881	7.3552	18.82	0
1.882	7.35997	18.836	0
1.884	7.36527	18.853	0
1.886	7.37076	18.87	0
1.887	7.37627	18.886	0
1.889	7.38179	18.903	0
1.891	7.38693	18.919	0
1.892	7.3915	18.936	0
1.894	7.39607	18.953	0
1.896	7.40112	18.969	0
1.897	7.40668	18.986	0
1.899	7.41189	19.003	0
1.901	7.41691	19.019	0
1.902	7.42211	19.036	0
1.904	7.42773	19.052	0
1.906	7.43346	19.069	0
1.907	7.43905	19.086	0
1.909	7.44459	19.102	0
1.911	7.45005	19.119	0
1.912	7.45527	19.136	0
1.914	7.46015	19.152	0
1.916	7.46493	19.169	0
1.917	7.46962	19.185	0
1.919	7.47409	19.202	0
1.921	7.47848	19.219	0
1.922	7.4829	19.235	0
1.924	7.48732	19.252	0
1.926	7.49172	19.269	0
1.927	7.49582	19.285	0
1.929	7.49947	19.302	0
1.931	7.50311	19.319	0
1.932	7.50699	19.335	0
1.934	7.51135	19.352	0
1.936	7.51573	19.368	0
1.937	7.52006	19.385	0
1.939	7.52442	19.402	0
1.941	7.529	19.418	0
1.942	7.53373	19.435	0
1.944	7.53821	19.452	0
1.946	7.54268	19.468	0
1.947	7.54725	19.485	0
1.949	7.55189	19.501	0
1.951	7.55638	19.518	0
1.952	7.5608	19.535	0
1.954	7.5651	19.551	0
1.956	7.56881	19.568	0
1.957	7.57184	19.585	0
1.959	7.57478	19.601	0
1.961	7.57773	19.618	0
1.962	7.58087	19.634	0
1.964	7.58429	19.651	0
1.966	7.58743	19.668	0
1.967	7.59054	19.684	0
1.969	7.59366	19.701	0
1.971	7.59685	19.718	0
1.972	7.6002	19.734	0
1.974	7.60353	19.751	0
1.976	7.60686	19.768	0
1.977	7.61021	19.784	0
1.979	7.61333	19.801	0
1.98	7.61562	19.817	0
1.982	7.61781	19.834	0
1.984	7.62001	19.851	0
1.985	7.62237	19.867	0
1.987	7.6251	19.884	0.033916
1.989	7.6275	19.901	0.0766
1.99	7.62991	19.917	0.119673
1.992	7.63236	19.934	0.163003
1.994	7.63502	19.95	0.206255
1.995	7.63792	19.967	0.24935
1.997	7.64081	19.984	0.292661
1.999	7.64371	20	0.335902
2	7.64676	20.017	0.379103
2.002	7.65035	20.034	0.422331
2.004	7.65409	20.05	0.465523
2.005	7.65784	20.067	0.508747
2.007	7.66161	20.083	0.551792
2.009	7.66553	20.1	0.595137
2.01	7.66972	20.117	0.63839
2.012	7.67391	20.133	0.68147
2.014	7.67809	20.15	0.724803
2.015	7.68215	20.167	0.76804
2.017	7.68569	20.183	0.811098
2.019	7.68896	20.2	0.854442
2.02	7.69234	20.216	0.897667
2.022	7.69567	20.233	0.94089
2.024	7.69866	20.25	0.984133
2.025	7.70106	20.266	1.02732
2.027	7.70344	20.283	1.07055
2.029	7.70584	20.3	1.11362
2.03	7.70808	20.316	1.15694
2.032	7.70969	20.333	1.20018
2.034	7.7112	20.35	1.24326
2.035	7.71272	20.366	1.28659
2.037	7.71439	20.383	1.32974
2.039	7.71706	20.399	1.37287
2.04	7.72103	20.416	1.41622
2.042	7.72499	20.433	1.45948
2.044	7.72895	20.449	1.5027
2.045	7.73272	20.466	1.54591
2.047	7.73558	20.483	1.58914
2.049	7.73813	20.499	1.63234
2.05	7.74068	20.516	1.6754
2.052	7.74339	20.532	1.71874
2.054	7.74696	20.549	1.76199
2.055	7.75137	20.566	1.80507
2.057	7.75578	20.582	1.84839
2.059	7.7602	20.599	1.89169
2.06	7.7646	20.616	1.93484
2.062	7.76892	20.632	1.97807
2.064	7.7732	20.649	2.02129
2.065	7.77747	20.665	2.06451
2.067	7.78178	20.682	2.10772
2.069	7.78605	20.699	2.15094
2.07	7.78953	20.715	2.19414
2.072	7.79292	20.732	2.23722
2.074	7.7964	20.749	2.28052
2.075	7.79963	20.765	2.32378
2.077	7.80176	20.782	2.36688
2.079	7.80366	20.799	2.41019
2.08	7.80555	20.815	2.45343
2.082	7.80753	20.832	2.49663
2.084	7.81019	20.848	2.53985
2.085	7.8128	20.865	2.58306
2.087	7.81536	20.882	2.62629
2.089	7.81791	20.898	2.6694
2.09	7.8203	20.915	2.71268
2.092	7.82214	20.932	2.75593
2.094	7.82372	20.948	2.79901
2.095	7.8253	20.965	2.8423
2.097	7.82693	20.981	2.88558
2.099	7.82903	20.998	2.92879
2.1	7.83114	21.015	2.97202
2.102	7.83323	21.031	3.01523
2.104	7.83527	21.048	3.05844
2.105	7.83692	21.065	3.10156
2.107	7.83793	21.081	3.14484
2.109	7.83919	21.098	3.18809
2.11	7.84044	21.114	3.23119
2.112	7.84179	21.131	3.27448
2.113	7.84413	21.148	3.3177
2.115	7.84717	21.164	3.36095
2.117	7.85027	21.181	3.40419
2.118	7.85338	21.198	3.44738
2.12	7.85667	21.214	3.4906
2.122	7.85972	21.231	3.53376
2.123	7.86215	21.248	3.577
2.125	7.86451	21.264	3.62024
2.127	7.8669	21.281	3.66333
2.128	7.86857	21.297	3.70661
2.13	7.87045	21.314	3.7499
2.132	7.87244	21.331	3.79313
2.133	7.87441	21.347	3.83635
2.135	7.87623	21.364	3.87956
2.137	7.87674	21.381	3.92275
2.138	7.87603	21.397	3.96584
2.14	7.87532	21.414	4.00911
2.142	7.87467	21.43	4.0524
2.143	7.87539	21.447	4.09551
2.145	7.87646	21.464	4.13879
2.147	7.87752	21.48	4.18203
2.148	7.87859	21.497	4.22525
2.15	7.87963	21.514	4.26843
2.152	7.88023	21.53	4.31164
2.153	7.88068	21.547	4.35489
2.155	7.88113	21.563	4.39801
2.157	7.88159	21.58	4.44129
2.158	7.88254	21.597	4.48456
2.16	7.88484	21.613	4.52765
2.162	7.88714	21.63	4.57092
2.163	7.88944	21.647	4.61419
2.165	7.89165	21.663	4.65743
2.167	7.89259	21.68	4.70064
2.168	7.89321	21.696	4.74384
2.17	7.89383	21.713	4.78707
2.172	7.89444	21.73	4.83017
2.173	7.89491	21.746	4.87343
2.175	7.89574	21.763	4.91672
2.177	7.89658	21.78	4.95989
2.178	7.89739	21.796	5.00312
2.18	7.89863	21.813	5.04635
2.182	7.90034	21.83	5.08956
2.183	7.90195	21.846	5.13273
2.185	7.90356	21.863	5.17597
2.187	7.90516	21.879	5.21921
2.188	7.90699	21.896	5.26233
2.19	7.90959	21.913	5.3056
2.192	7.91222	21.929	5.34884
2.193	7.91484	21.946	5.39206
2.195	7.9173	21.963	5.43528
2.197	7.9184	21.979	5.47851
2.198	7.91921	21.996	5.52173
2.2	7.92	22.012	5.56483
2.202	7.9208	22.029	5.60809
2.203	7.92216	22.046	5.65134
2.205	7.92347	22.062	5.69451
2.207	7.92478	22.079	5.73776
2.208	7.92608	22.096	5.78101
2.21	7.92723	22.112	5.82422
2.212	7.92873	22.129	5.86738
2.213	7.93042	22.145	5.91061
2.215	7.93215	22.162	5.95389
2.217	7.93386	22.179	5.99699
2.218	7.93626	22.195	6.04021
2.22	7.93951	22.212	6.08351
2.222	7.94282	22.229	6.12673
2.223	7.94612	22.245	6.16995
2.225	7.94948	22.262	6.21316
2.227	7.95189	22.279	6.25637
2.228	7.9539	22.295	6.29949
2.23	7.95589	22.312	6.34273
2.232	7.95785	22.328	6.38603
2.233	7.9588	22.345	6.42924
2.235	7.95953	22.362	6.47247
2.237	7.96025	22.378	6.51567
2.238	7.96096	22.395	6.55889
2.24	7.96194	22.412	6.60201
2.241	7.96326	22.428	6.64524
2.243	7.96431	22.445	6.68853
2.245	7.96531	22.461	6.73171
2.246	7.96632	22.478	6.77488
2.248	7.96825	22.495	6.81812
2.25	7.97096	22.511	6.86139
2.251	7.97377	22.528	6.90451
2.253	7.97657	22.545	6.94774
2.255	7.97898	22.561	6.99106
2.256	7.98098	22.578	7.03417
2.258	7.98303	22.594	7.07738
2.26	7.9851	22.611	7.1207
2.261	7.98716	22.628	7.16392
2.263	7.98995	22.644	7.20709
2.265	7.99206	22.661	7.2503
2.266	7.99407	22.678	7.29356
2.268	7.99607	22.694	7.33669
2.27	7.99753	22.711	7.3799
2.271	7.99847	22.728	7.42316
2.273	7.9994	22.744	7.46638
2.275	8.00034	22.761	7.50961
2.276	8.00127	22.777	7.55282
2.278	8.00276	22.794	7.59605
2.28	8.00466	22.811	7.63919
2.281	8.00663	22.827	7.6824
2.283	8.00859	22.844	7.72569
2.285	8.01023	22.861	7.7689
2.286	8.01082	22.877	7.81212
2.288	8.01111	22.894	7.85534
2.29	8.01136	22.91	7.89857
2.291	8.01164	22.927	7.9417
2.293	8.01235	22.944	7.98491
2.295	8.01348	22.96	8.02824
2.296	8.01468	22.977	8.07145
2.298	8.01587	22.994	8.11463
2.3	8.01704	23.01	8.15786
2.301	8.01767	23.027	8.20108
2.303	8.01784	23.043	8.24419
2.305	8.01794	23.06	8.2874
2.306	8.01806	23.077	8.33069
2.308	8.01822	23.093	8.3739
2.31	8.01806	23.11	8.41713
2.311	8.01781	23.127	8.46036
2.313	8.01756	23.143	8.50358
2.315	8.01794	23.16	8.54672
2.316	8.01963	23.177	8.58987
2.318	8.02199	23.193	8.63313
2.32	8.02445	23.21	8.67641
2.321	8.02674	23.226	8.71965
2.323	8.02839	23.243	8.76287
2.325	8.02932	23.26	8.8061
2.326	8.03012	23.276	8.84924
2.328	8.03092	23.293	8.89242
2.33	8.03202	23.31	8.93575
2.331	8.03246	23.326	8.97896
2.333	8.03252	23.343	9.02212
2.335	8.03253	23.359	9.06532
2.336	8.03309	23.376	9.10859
2.338	8.03469	23.393	9.15174
2.34	8.037	23.409	9.19491
2.341	8.0395	23.426	9.23825
2.343	8.04203	23.443	9.28148
2.345	8.04421	23.459	9.3246
2.346	8.04535	23.476	9.36777
2.348	8.04608	23.492	9.41109
2.35	8.04678	23.509	9.45431
2.351	8.04767	23.526	9.49753
2.353	8.04923	23.542	9.54075
2.355	8.05145	23.559	9.58397
2.356	8.05384	23.576	9.62711
2.358	8.05594	23.592	9.67029
2.36	8.05675	23.609	9.71363
2.361	8.05681	23.625	9.75684
2.363	8.05675	23.642	9.80005
2.365	8.0567	23.659	9.84326
2.366	8.05739	23.675	9.88646
2.368	8.05895	23.692	9.92961
2.37	8.06097	23.709	9.97277
2.371	8.0631	23.725	10.0161
2.373	8.06525	23.742	10.0593
2.374	8.06748	23.759	10.1025
2.376	8.06948	23.775	10.1458
2.378	8.07138	23.792	10.189
2.379	8.07328	23.808	10.2321
2.381	8.07531	23.825	10.2753
2.383	8.07745	23.842	10.3186
2.384	8.07964	23.858	10.3618
2.386	8.08183	23.875	10.405
2.388	8.08437	23.892	10.4482
2.389	8.08758	23.908	10.4915
2.391	8.09093	23.925	10.5347
2.393	8.09417	23.941	10.5779
2.394	8.09745	23.958	10.6211
2.396	8.09989	23.975	10.6643
2.398	8.10134	23.991	10.7075
2.399	8.10231	24.008	10.7507
2.401	8.10317	24.025	10.794
2.403	8.10454	24.041	10.8372
2.404	8.10667	24.058	10.8804
2.406	8.10936	24.074	10.9236
2.408	8.11221	24.091	10.9669
2.409	8.11505	24.108	11.01
2.411	8.11727	24.124	11.0532
2.413	8.11883	24.141	11.0965
2.414	8.12018	24.158	11.1397
2.416	8.12152	24.174	11.1829
2.418	8.12287	24.191	11.226
2.419	8.1238	24.208	11.2693
2.421	8.12404	24.224	11.3126
2.423	8.12404	24.241	11.3557
2.424	8.12402	24.257	11.3989
2.426	8.12392	24.274	11.4422
2.428	8.12407	24.291	11.4854
2.429	8.1244	24.307	11.5285
2.431	8.12473	24.324	11.5719
2.433	8.12465	24.341	11.6151
2.434	8.12398	24.357	11.6583
2.436	8.12299	24.374	11.7014
2.438	8.12194	24.39	11.7447
2.439	8.12116	24.407	11.7879
2.441	8.12145	24.424	11.8311
2.443	8.12328	24.44	11.8743
2.444	8.12572	24.457	11.9176
2.446	8.1281	24.474	11.9608
2.448	8.13022	24.49	12.0039
2.449	8.13156	24.507	12.0472
2.451	8.13219	24.523	12.0904
2.453	8.13263	24.54	12.1337
2.454	8.1331	24.557	12.1769
2.456	8.13362	24.573	12.2201
2.458	8.13411	24.59	12.2633
2.459	8.13454	24.607	12.3065
2.461	8.13497	24.623	12.3498
2.463	8.13556	24.64	12.3929
2.464	8.13615	24.657	12.4361
2.466	8.13665	24.673	12.4792
2.468	8.13712	24.69	12.5226
2.469	8.13706	24.706	12.5657
2.471	8.13594	24.723	12.609
2.473	8.13391	24.74	12.6522
2.474	8.13154	24.756	12.6954
2.476	8.12944	24.773	12.7386
2.478	8.12863	24.79	12.7819
2.479	8.12942	24.806	12.8251
2.481	8.13082	24.823	12.8683
2.483	8.13221	24.839	12.9115
2.484	8.13317	24.856	12.9546
2.486	8.13314	24.873	12.998
2.488	8.13231	24.889	13.0412
2.489	8.13123	24.906	13.0843
2.491	8.13021	24.923	13.1275
2.493	8.12935	24.939	13.1708
2.494	8.12913	24.956	13.214
2.496	8.12942	24.972	13.2573
2.498	8.12976	24.989	13.3005
2.499	8.13034	25.006	13.3437
2.501	8.13114	25.022	13.3869
2.503	8.13195	25.039	13.43
2.504	8.13275	25.056	13.4733
2.506	8.13365	25.072	13.5166
2.507	8.1348	25.089	13.5597
2.509	8.13615	25.105	13.6028
2.511	8.13756	25.122	13.6462
2.512	8.13898	25.139	13.6894
2.514	8.14051	25.155	13.7326
2.516	8.14253	25.172	13.7759
2.517	8.14508	25.189	13.8191
2.519	8.14777	25.205	13.8623
2.521	8.15042	25.222	13.9055
2.522	8.15262	25.239	13.9487
2.524	8.15389	25.255	13.9919
2.526	8.15461	25.272	14.0351
2.527	8.15534	25.288	14.0782
2.529	8.15627	25.305	14.1216
2.531	8.15768	25.322	14.1648
2.532	8.15942	25.338	14.208
2.534	8.1612	25.355	14.2511
2.536	8.163	25.372	14.2944
2.537	8.16507	25.388	14.3376
2.539	8.16735	25.405	14.3809
2.541	8.1696	25.421	14.4241
2.542	8.17185	25.438	14.4673
2.544	8.1734	25.455	14.5105
2.546	8.17373	25.471	14.5537
2.547	8.17358	25.488	14.5969
2.549	8.17344	25.505	14.6402
2.551	8.17334	25.521	14.6834
2.552	8.17385	25.538	14.7264
2.554	8.17527	25.554	14.7698
2.556	8.17706	25.571	14.813
2.557	8.17887	25.588	14.8562
2.559	8.18067	25.604	14.8993
2.561	8.18169	25.621	14.9426
2.562	8.18165	25.638	14.9858
2.564	8.18162	25.654	15.0291
2.566	8.18163	25.671	15.0723
2.567	8.1821	25.688	15.1155
2.569	8.18327	25.704	15.1587
2.571	8.18463	25.721	15.2019
2.572	8.18599	25.737	15.2452
2.574	8.18697	25.754	15.2884
2.576	8.1873	25.771	15.3316
2.577	8.18749	25.787	15.3747
2.579	8.18769	25.804	15.418
2.581	8.18808	25.821	15.4612
2.582	8.18889	25.837	15.5044
2.584	8.18985	25.854	15.5475
2.586	8.19078	25.87	15.5909
2.587	8.19171	25.887	15.6341
2.589	8.1925	25.904	15.6773
2.591	8.19295	25.92	15.7204
2.592	8.19323	25.937	15.7637
2.594	8.19351	25.954	15.807
2.596	8.19379	25.97	15.8502
2.597	8.19398	25.987	15.8933
2.599	8.19399	26.003	15.9366
2.601	8.19394	26.02	15.9799
2.602	8.19386	26.037	16.023
2.604	8.19345	26.053	16.0662
2.606	8.19279	26.07	16.1095
2.607	8.19235	26.087	16.1527
2.609	8.19192	26.103	16.1959
2.611	8.19174	26.12	16.2391
2.612	8.19218	26.137	16.2823
2.614	8.1928	26.153	16.3255
2.616	8.19335	26.17	16.3686
2.617	8.19389	26.186	16.4119
2.619	8.19433	26.203	16.4552
2.621	8.19441	26.22	16.4984
2.622	8.19412	26.236	16.5414
2.624	8.19384	26.253	16.5848
2.626	8.1934	26.27	16.6281
2.627	8.19301	26.286	16.6713
2.629	8.19351	26.303	16.7143
2.631	8.19443	26.319	16.7577
2.632	8.19536	26.336	16.8009
2.634	8.19619	26.353	16.8441
2.635	8.19676	26.369	16.8872
2.637	8.19715	26.386	16.9306
2.639	8.19753	26.403	16.9738
2.64	8.19784	26.419	17.017
2.642	8.19779	26.436	17.0602
2.644	8.19724	26.452	17.1034
2.645	8.19662	26.469	17.1466
2.647	8.19601	26.486	17.1898
2.649	8.19544	26.502	17.2329
2.65	8.1949	26.519	17.2763
2.652	8.19426	26.536	17.3194
2.654	8.19361	26.552	17.3627
2.655	8.19307	26.569	17.4059
2.657	8.19316	26.585	17.4491
2.659	8.19408	26.602	17.4924
2.66	8.19498	26.619	17.5355
2.662	8.19587	26.635	17.5788
2.664	8.19674	26.652	17.622
2.665	8.1972	26.669	17.6652
2.667	8.19711	26.685	17.7082
2.669	8.19702	26.702	17.7517
2.67	8.19687	26.719	17.7949
2.672	8.19656	26.735	17.8381
2.674	8.19625	26.752	17.8811
2.675	8.19595	26.768	17.9245
2.677	8.19568	26.785	17.9677
2.679	8.19563	26.802	18.0108
2.68	8.19606	26.818	18.054
2.682	8.19648	26.835	18.0974
2.684	8.19691	26.852	18.1406
2.685	8.19741	26.868	18.1838
2.687	8.19842	26.885	18.2268
2.689	8.20018	26.901	18.2702
2.69	8.20194	26.918	18.3135
2.692	8.20371	26.935	18.3566
2.694	8.20552	26.951	18.3997
2.695	8.20706	26.968	18.4431
2.697	8.20804	26.985	18.4863
2.699	8.20901	27.001	18.5295
2.7	8.20999	27.018	18.5726
2.702	8.21101	27.034	18.6159
2.704	8.21219	27.051	18.6591
2.705	8.21337	27.068	18.7024
2.707	8.21451	27.084	18.7454
2.709	8.21557	27.101	18.7888
2.71	8.21682	27.118	18.832
2.712	8.21842	27.134	18.8753
2.714	8.22001	27.151	18.9183
2.715	8.22159	27.168	18.9616
2.717	8.22338	27.184	19.0049
2.719	8.22537	27.201	19.0481
2.72	8.22737	27.217	19.0911
2.722	8.22936	27.234	19.1345
2.724	8.23133	27.251	19.1778
2.725	8.23339	27.267	19.2209
2.727	8.23562	27.284	19.2641
2.729	8.23787	27.301	19.3074
2.73	8.24018	27.317	19.3507
2.732	8.24289	27.334	19.3938
2.734	8.24567	27.35	19.4369
2.735	8.24846	27.367	19.4802
2.737	8.25121	27.384	19.5235
2.739	8.25358	27.4	19.5667
2.74	8.25489	27.417	19.6098
2.742	8.25591	27.434	19.6531
2.744	8.25693	27.45	19.6962
2.745	8.25809	27.467	19.7396
2.747	8.25996	27.483	19.7826
2.749	8.26184	27.5	19.826
2.75	8.2637	27.517	19.8692
2.752	8.26558	27.533	19.9124
2.754	8.26744	27.55	19.9555
2.755	8.26945	27.567	19.9988
2.757	8.27159	27.583	20.0421
2.759	8.27372	27.6	20.0853
2.76	8.27579	27.617	20.1283
2.762	8.27751	27.633	20.1717
2.764	8.2786	27.65	20.2149
2.765	8.27968	27.666	20.2581
2.767	8.28075	27.683	20.3012
2.768	8.28169	27.7	20.3446
2.77	8.28233	27.716	20.3878
2.772	8.28275	27.733	20.431
2.773	8.28317	27.75	20.474
2.775	8.28358	27.766	20.5174
2.777	8.28378	27.783	20.5606
2.778	8.2834	27.799	20.6039
2.78	8.28302	27.816	20.6469
2.782	8.28264	27.833	20.6902
2.783	8.28237	27.849	20.7335
2.785	8.28223	27.866	20.7767
2.787	8.2821	27.883	20.8198
2.788	8.28197	27.899	20.863
2.79	8.28183	27.916	20.9064
2.792	8.28161	27.932	20.9496
2.793	8.2817	27.949	20.9926
2.795	8.28179	27.966	21.036
2.797	8.28182	27.982	21.0792
2.798	8.28119	27.999	21.1224
2.8	8.28003	28.016	21.1655
2.802	8.27879	28.032	21.2088
2.803	8.27755	28.049	21.2521
2.805	8.27645	28.066	21.2953
2.807	8.27659	28.082	21.3383
2.808	8.27688	28.099	21.3817
2.81	8.27717	28.115	21.4249
2.812	8.27745	28.132	21.4682
2.813	8.27746	28.149	21.5112
2.815	8.27689	28.165	21.5546
2.817	8.27603	28.182	21.5978
2.818	8.27518	28.199	21.641
2.82	8.27461	28.215	21.6842
2.822	8.27501	28.232	21.7275
2.823	8.27622	28.248	21.7707
2.825	8.27744	28.265	21.814
2.827	8.27866	28.282	21.8571
2.828	8.27989	28.298	21.9003
2.83	8.28028	28.315	21.9435
2.832	8.28046	28.332	21.9867
2.833	8.28064	28.348	22.03
2.835	8.28109	28.365	22.0732
2.837	8.28212	28.381	22.1164
2.838	8.28325	28.398	22.1594
2.84	8.28438	28.415	22.2028
2.842	8.28549	28.431	22.2459
2.843	8.28594	28.448	22.2892
2.845	8.28634	28.465	22.3325
2.847	8.28683	28.481	22.3757
2.848	8.28732	28.498	22.4188
2.85	8.28821	28.514	22.4621
2.852	8.29001	28.531	22.5053
2.853	8.29197	28.548	22.5485
2.855	8.29391	28.564	22.5916
2.857	8.29584	28.581	22.6349
2.858	8.29628	28.598	22.6782
2.86	8.29664	28.614	22.7214
2.862	8.297	28.631	22.7645
2.863	8.29736	28.648	22.8078
2.865	8.29808	28.664	22.8511
2.867	8.29951	28.681	22.8943
2.868	8.30081	28.697	22.9375
2.87	8.30211	28.714	22.9807
2.872	8.30341	28.731	23.0239
2.873	8.30483	28.747	23.0671
2.875	8.30652	28.764	23.1104
2.877	8.30824	28.781	23.1536
2.878	8.30997	28.797	23.1968
2.88	8.31146	28.814	23.24
2.882	8.31321	28.83	23.2832
2.883	8.31539	28.847	23.3263
2.885	8.3176	28.864	23.3695
2.887	8.3198	28.88	23.4128
2.888	8.32269	28.897	23.4561
2.89	8.32444	28.914	23.4992
2.892	8.32613	28.93	23.5424
2.893	8.32781	28.947	23.5857
2.895	8.32946	28.963	23.6289
2.896	8.33125	28.98	23.672
2.898	8.33319	28.997	23.7153
2.9	8.33513	29.013	23.7586
2.901	8.33707	29.03	23.8018
2.903	8.33815	29.047	23.845
2.905	8.33833	29.063	23.8882
2.906	8.33846	29.08	23.9314
2.908	8.33859	29.097	23.9745
2.91	8.33864	29.113	24.0178
2.911	8.33845	29.13	24.0611
2.913	8.33822	29.146	24.1043
2.915	8.338	29.163	24.1475
2.916	8.33777	29.18	24.1907
2.918	8.33878	29.196	24.2338
2.92	8.33971	29.213	24.2771
2.921	8.34061	29.23	24.3204
2.923	8.34152	29.246	24.3636
2.925	8.34221	29.263	24.4067
2.926	8.34317	29.279	24.4499
2.928	8.34441	29.296	24.4932
2.93	8.34565	29.313	24.5363
2.931	8.34691	29.329	24.5796
2.933	8.34901	29.346	24.6229
2.935	8.35044	29.363	24.6661
2.936	8.35177	29.379	24.7093
2.938	8.35309	29.396	24.7525
2.94	8.35353	29.412	24.7958
2.941	8.35429	29.429	24.839
2.943	8.35526	29.446	24.8822
2.945	8.35624	29.462	24.9254
2.946	8.35723	29.479	24.9685
2.948	8.35736	29.496	25.0117
2.95	8.35659	29.512	25.055
2.951	8.35571	29.529	25.0981
2.953	8.35483	29.546	25.1413
2.955	8.35441	29.562	25.1846
2.956	8.35504	29.579	25.2279
2.958	8.35579	29.595	25.2711
2.96	8.35654	29.612	25.3143
2.961	8.35729	29.629	25.3575
2.963	8.35835	29.645	25.4007
2.965	8.35981	29.662	25.444
2.966	8.36132	29.679	25.4872
2.968	8.36283	29.695	25.5303
2.97	8.36426	29.712	25.5736
2.971	8.36484	29.728	25.6168
2.973	8.36521	29.745	25.66
2.975	8.36558	29.762	25.7031
2.976	8.36594	29.778	25.7464
2.978	8.36674	29.795	25.7897
2.98	8.36776	29.812	25.8329
2.981	8.36881	29.828	25.8761
2.983	8.36984	29.845	25.9193
2.985	8.37089	29.861	25.9626
2.986	8.37254	29.878	26.0058
2.988	8.3744	29.895	26.049
2.99	8.37627	29.911	26.0921
2.991	8.37814	29.928	26.1353
2.993	8.38114	29.945	26.1785
2.995	8.38471	29.961	26.2218
2.996	8.38834	29.978	26.265
2.998	8.39197	29.994	26.3082
3	8.39522	30.011	26.3515
3.001	8.39625	30.028	26.3947
3.003	8.39641	30.044	26.4379
3.005	8.3965	30.061	26.4811
3.006	8.39659	30.078	26.5243
3.008	8.39649	30.094	26.5675
3.01	8.39646	30.111	26.6108
3.011	8.39646	30.128	26.6539
3.013	8.39646	30.144	26.6971
3.015	8.39639	30.161	26.7404
3.016	8.39498	30.177	26.7836
3.018	8.39323	30.194	26.8268
3.02	8.39149	30.211	26.87
3.021	8.38974	30.227	26.9133
3.023	8.38932	30.244	26.9566
3.025	8.39027	30.261	26.9998
3.026	8.3915	30.277	27.0429
3.028	8.39272	30.294	27.0861
3.029	8.39403	30.31	27.1294
3.031	8.39606	30.327	27.1726
3.033	8.39834	30.344	27.2156
3.034	8.40063	30.36	27.2589
3.036	8.40285	30.377	27.3022
3.038	8.40486	30.394	27.3454
3.039	8.40596	30.41	27.3887
3.041	8.40676	30.427	27.4319
3.043	8.40757	30.443	27.4751
3.044	8.40843	30.46	27.5183
3.046	8.40982	30.477	27.5615
3.048	8.41138	30.493	27.6046
3.049	8.41293	30.51	27.6479
3.051	8.41448	30.527	27.6912
3.053	8.41565	30.543	27.7343
3.054	8.41666	30.56	27.7775
3.056	8.41766	30.577	27.8208
3.058	8.41865	30.593	27.864
3.059	8.41976	30.61	27.9072
3.061	8.42164	30.626	27.9505
3.063	8.4237	30.643	27.9936
3.064	8.42574	30.66	28.0368
3.066	8.42777	30.676	28.0801
3.068	8.42892	30.693	28.1233
3.069	8.42913	30.71	28.1666
3.071	8.4291	30.726	28.2097
3.073	8.42907	30.743	28.2529
3.074	8.42899	30.759	28.2962
3.076	8.42773	30.776	28.3394
3.078	8.4259	30.793	28.3825
3.079	8.42402	30.809	28.4257
3.081	8.42215	30.826	28.469
3.083	8.421	30.843	28.5123
3.084	8.42103	30.859	28.5555
3.086	8.42142	30.876	28.5987
3.088	8.42181	30.892	28.6419
3.089	8.42216	30.909	28.6851
3.091	8.42276	30.926	28.7283
3.093	8.42362	30.942	28.7715
3.094	8.42456	30.959	28.8147
3.096	8.4255	30.976	28.858
3.098	8.42664	30.992	28.9012
3.099	8.42814	31.009	28.9444
3.101	8.42979	31.026	28.9876
3.103	8.43143	31.042	29.0308
3.104	8.43299	31.059	29.074
3.106	8.43373	31.075	29.1173
3.108	8.43387	31.092	29.1604
3.109	8.43391	31.109	29.2036
3.111	8.43394	31.125	29.2469
3.113	8.43404	31.142	29.2901
3.114	8.43407	31.159	29.3333
3.116	8.43405	31.175	29.3766
3.118	8.43402	31.192	29.4198
3.119	8.43415	31.208	29.463
3.121	8.43487	31.225	29.5062
3.123	8.43579	31.242	29.5494
3.124	8.43668	31.258	29.5925
3.126	8.43756	31.275	29.6358
3.128	8.43821	31.292	29.6791
3.129	8.43803	31.308	29.7223
3.131	8.43744	31.325	29.7655
3.133	8.43685	31.341	29.8087
3.134	8.43624	31.358	29.8519
3.136	8.43585	31.375	29.8951
3.138	8.43578	31.391	29.9383
3.139	8.43581	31.408	29.9815
3.141	8.43583	31.425	30.0248
3.143	8.43539	31.441	30.068
3.144	8.43363	31.458	30.1112
3.146	8.43113	31.474	30.1544
3.148	8.42862	31.491	30.1975
3.149	8.42634	31.508	30.2408
3.151	8.42546	31.524	30.2841
3.153	8.42599	31.541	30.3273
3.154	8.42688	31.558	30.3705
3.156	8.42777	31.574	30.4137
3.157	8.42854	31.591	30.4569
3.159	8.42938	31.608	30.5002
3.161	8.43034	31.624	30.5433
3.162	8.4313	31.641	30.5864
3.164	8.43263	31.657	30.6297
3.166	8.43435	31.674	30.673
3.167	8.43604	31.691	30.7162
3.169	8.43767	31.707	30.7594
3.171	8.4393	31.724	30.8026
3.172	8.44003	31.741	30.8458
3.174	8.44006	31.757	30.8891
3.176	8.44013	31.774	30.9323
3.177	8.44021	31.79	30.9755
3.179	8.44029	31.807	31.0187
3.181	8.44025	31.824	31.0619
3.182	8.44009	31.84	31.1052
3.184	8.43989	31.857	31.1483
3.186	8.4397	31.874	31.1915
3.187	8.4403	31.89	31.2348
3.189	8.44183	31.907	31.278
3.191	8.4436	31.923	31.3213
3.192	8.44537	31.94	31.3644
3.194	8.44693	31.957	31.4076
3.196	8.44797	31.973	31.4509
3.197	8.44868	31.99	31.4941
3.199	8.44936	32.007	31.5373
3.201	8.45012	32.023	31.5805
3.202	8.45146	32.04	31.6238
3.204	8.45286	32.057	31.667
3.206	8.45377	32.073	31.7102
3.207	8.45468	32.09	31.7534
3.209	8.45542	32.106	31.7965
3.211	8.45608	32.123	31.8398
3.212	8.45696	32.14	31.8831
3.214	8.45799	32.156	31.9262
3.216	8.45903	32.173	31.9693
3.217	8.4601	32.19	32.0126
3.219	8.46131	32.206	32.0559
3.221	8.46265	32.223	32.0991
3.222	8.46398	32.239	32.1423
3.224	8.46534	32.256	32.1856
3.226	8.46702	32.273	32.2287
3.227	8.46917	32.289	32.272
3.229	8.47148	32.306	32.3152
3.231	8.47381	32.323	32.3584
3.232	8.47602	32.339	32.4015
3.234	8.4776	32.356	32.4449
3.236	8.47866	32.372	32.4881
3.237	8.47968	32.389	32.5313
3.239	8.48018	32.406	32.5745
3.241	8.48026	32.422	32.6176
3.242	8.48051	32.439	32.6609
3.244	8.48077	32.456	32.7041
3.246	8.48114	32.472	32.7474
3.247	8.48135	32.489	32.7905
3.249	8.48095	32.506	32.8336
3.251	8.48018	32.522	32.877
3.252	8.47947	32.539	32.9202
3.254	8.47911	32.555	32.9634
3.256	8.47983	32.572	33.0066
3.257	8.48155	32.589	33.0498
3.259	8.48327	32.605	33.0931
3.261	8.48491	32.622	33.1363
3.262	8.48641	32.639	33.1795
3.264	8.48788	32.655	33.2227
3.266	8.48934	32.672	33.2659
3.267	8.49095	32.688	33.3091
3.269	8.49341	32.705	33.3524
3.271	8.49627	32.722	33.3956
3.272	8.49833	32.738	33.4387
3.274	8.50039	32.755	33.482
3.276	8.50189	32.772	33.5252
3.277	8.50243	32.788	33.5685
3.279	8.503	32.805	33.6116
3.281	8.50381	32.821	33.6546
3.282	8.50472	32.838	33.6981
3.284	8.50615	32.855	33.7413
3.286	8.50764	32.871	33.7846
3.287	8.50833	32.888	33.8277
3.289	8.50903	32.905	33.8708
3.29	8.50955	32.921	33.9142
3.292	8.5098	32.938	33.9574
3.294	8.51011	32.954	34.0006
3.295	8.51052	32.971	34.0438
3.297	8.51091	32.988	34.0869
3.299	8.51114	33.004	34.1302
3.3	8.51116	33.021	34.1735
3.302	8.51116	33.038	34.2167
3.304	8.51116	33.054	34.2599
3.305	8.51123	33.071	34.303
3.307	8.51147	33.088	34.3463
3.309	8.51178	33.104	34.3895
3.31	8.51209	33.121	34.4327
3.312	8.51246	33.137	34.4759
3.314	8.51323	33.154	34.5192
3.315	8.5145	33.171	34.5624
3.317	8.51572	33.187	34.6056
3.319	8.51695	33.204	34.6488
3.32	8.51798	33.221	34.6921
3.322	8.51887	33.237	34.7352
[truncated: 32,164 more rows]

## Sheet: SEC
Volume (mL)	Abs 280 nm (mAU)
0	0.062493
0.001	0.062201
0.002	0.061908
0.002	0.061615
0.003	0.061323
0.004	0.060799
0.004	0.060041
0.005	0.059109
0.006	0.058172
0.006	0.057236
0.007	0.056374
0.008	0.055457
0.008	0.054374
0.009	0.053282
0.01	0.052195
0.01	0.051111
0.011	0.050086
0.012	0.049194
0.012	0.048496
0.013	0.047802
0.014	0.047109
0.014	0.046435
0.015	0.045816
0.016	0.045475
0.016	0.045135
0.017	0.044796
0.018	0.044456
0.018	0.044117
0.019	0.043875
0.02	0.04378
0.02	0.043742
0.021	0.043704
0.022	0.043666
0.022	0.04383
0.023	0.044348
0.024	0.045031
0.024	0.045714
0.025	0.046397
0.025	0.047082
0.026	0.046936
0.027	0.046098
0.027	0.044904
0.028	0.043711
0.029	0.042521
0.029	0.041368
0.03	0.040344
0.031	0.039649
0.031	0.038912
0.032	0.038142
0.033	0.037347
0.033	0.036554
0.034	0.035761
0.035	0.035351
0.035	0.035126
0.036	0.0349
0.037	0.034676
0.037	0.034613
0.038	0.034226
0.039	0.033596
0.039	0.032899
0.04	0.032206
0.041	0.031512
0.041	0.031061
0.042	0.031141
0.043	0.031988
0.043	0.032834
0.044	0.033682
0.045	0.034425
0.045	0.034726
0.046	0.034007
0.047	0.033054
0.047	0.032107
0.048	0.031158
0.049	0.030182
0.049	0.029103
0.05	0.027649
0.05	0.026156
0.051	0.024666
0.052	0.023189
0.052	0.021718
0.053	0.020573
0.054	0.019578
0.054	0.018645
0.055	0.017708
0.056	0.016776
0.056	0.016263
0.057	0.015272
0.058	0.013795
0.058	0.012321
0.059	0.01085
0.06	0.009113
0.06	0.007612
0.061	0.006495
0.062	0.005543
0.062	0.004596
0.063	0.003652
0.064	0.002857
0.064	0.002225
0.065	0.001416
0.066	0.000609
0.066	-0.0002
0.067	-0.00112
0.068	-0.00227
0.068	-0.00368
0.069	-0.00496
0.07	-0.00621
0.07	-0.00746
0.071	-0.00865
0.072	-0.00869
0.072	-0.00859
0.073	-0.00845
0.074	-0.0083
0.074	-0.00816
0.075	-0.00788
0.076	-0.00707
0.076	-0.00595
0.077	-0.00471
0.077	-0.00346
0.078	-0.00222
0.079	-0.00166
0.079	-0.0017
0.08	-0.00211
0.081	-0.00252
0.081	-0.00294
0.082	-0.00327
0.083	-0.00334
0.083	-0.00303
0.084	-0.00271
0.085	-0.00238
0.085	-0.00205
0.086	-0.00167
0.087	-0.00114
0.087	-0.00018
0.088	0.000815
0.089	0.001815
0.089	0.002771
0.09	0.003454
0.091	0.003745
0.091	0.003977
0.092	0.004211
0.093	0.004445
0.093	0.004678
0.094	0.005283
0.095	0.005997
0.095	0.006725
0.096	0.007449
0.097	0.008179
0.097	0.008976
0.098	0.009461
0.099	0.009586
0.099	0.00971
0.1	0.009834
0.101	0.009895
0.101	0.009721
0.102	0.0093
0.102	0.009072
0.103	0.008845
0.104	0.008618
0.104	0.008613
0.105	0.008988
0.106	0.009187
0.106	0.009344
0.107	0.009493
0.108	0.009648
0.108	0.009835
0.109	0.010389
0.11	0.011492
0.11	0.012758
0.111	0.014028
0.112	0.015286
0.112	0.015904
0.113	0.015537
0.114	0.014713
0.114	0.013817
0.115	0.012931
0.116	0.012241
0.116	0.011681
0.117	0.011094
0.118	0.010387
0.118	0.009677
0.119	0.008969
0.12	0.008312
0.12	0.00798
0.121	0.008213
0.122	0.008634
0.122	0.009053
0.123	0.009334
0.124	0.009389
0.124	0.009156
0.125	0.008393
0.126	0.007633
0.126	0.006899
0.127	0.006304
0.127	0.006069
0.128	0.005843
0.129	0.005619
0.129	0.005396
0.13	0.005174
0.131	0.004958
0.131	0.00504
0.132	0.005462
0.133	0.006049
0.133	0.006636
0.134	0.007233
0.135	0.00792
0.135	0.008339
0.136	0.008547
0.137	0.008719
0.137	0.008883
0.138	0.008781
0.139	0.008459
0.139	0.007974
0.14	0.007414
0.141	0.006854
0.141	0.006375
0.142	0.006094
0.143	0.006152
0.143	0.00695
0.144	0.00775
0.145	0.008549
0.145	0.009415
0.146	0.010391
0.147	0.0108
0.147	0.010998
0.148	0.011141
0.149	0.011212
0.149	0.011077
0.15	0.010645
0.151	0.010154
0.151	0.00964
0.152	0.009111
0.153	0.008533
0.153	0.007489
0.154	0.006873
0.154	0.006537
0.155	0.00629
0.156	0.006052
0.156	0.006033
0.157	0.005902
0.158	0.005496
0.158	0.004988
0.159	0.004463
0.16	0.003888
0.16	0.003223
0.161	0.002485
0.162	0.001728
0.162	0.00066
0.163	-0.00096
0.164	-0.00246
0.164	-0.0038
0.165	-0.00495
0.166	-0.0051
0.166	-0.00535
0.167	-0.00576
0.168	-0.00616
0.168	-0.00655
0.169	-0.00694
0.17	-0.00734
0.17	-0.00766
0.171	-0.00772
0.172	-0.00771
0.172	-0.00776
0.173	-0.0078
0.174	-0.00837
0.174	-0.00884
0.175	-0.00904
0.176	-0.00918
0.176	-0.00919
0.177	-0.00907
0.178	-0.00916
0.178	-0.00937
0.179	-0.00958
0.179	-0.01007
0.18	-0.01091
0.181	-0.01189
0.181	-0.01289
0.182	-0.01394
0.183	-0.01502
0.183	-0.01585
0.184	-0.01645
0.185	-0.01704
0.185	-0.01762
0.186	-0.01804
0.187	-0.01795
0.187	-0.01785
0.188	-0.01771
0.189	-0.01716
0.189	-0.01658
0.19	-0.01613
0.191	-0.01569
0.191	-0.01521
0.192	-0.0145
0.193	-0.01372
0.193	-0.01293
0.194	-0.01214
0.195	-0.01177
0.195	-0.01094
0.196	-0.00976
0.197	-0.00853
0.197	-0.00689
0.198	-0.00445
0.199	-0.00284
0.199	-0.00146
0.2	-9.1e-05
0.201	0.001063
0.201	0.002077
0.202	0.003067
0.203	0.004055
0.203	0.004732
0.204	0.004702
0.204	0.004147
0.205	0.003457
0.206	0.002768
0.206	0.00214
0.207	0.001937
0.208	0.002128
0.208	0.002361
0.209	0.002623
0.21	0.002875
0.21	0.002944
0.211	0.002862
0.212	0.002779
0.212	0.002558
0.213	0.002416
0.214	0.002536
0.214	0.002656
0.215	0.002907
0.216	0.003687
0.216	0.004916
0.217	0.006201
0.218	0.007489
0.218	0.008577
0.219	0.009407
0.22	0.010164
0.22	0.010919
0.221	0.01165
0.222	0.011989
0.222	0.011899
0.223	0.01169
0.224	0.011482
0.224	0.011671
0.225	0.012065
0.226	0.012438
0.226	0.012812
0.227	0.012884
0.228	0.012379
0.228	0.011767
0.229	0.011232
0.23	0.010696
0.23	0.009995
0.231	0.008475
0.231	0.006512
0.232	0.004547
0.233	0.002967
0.233	0.002385
0.234	0.002313
0.235	0.002269
0.235	0.002225
0.236	0.001744
0.237	0.001405
0.237	0.001292
0.238	0.001179
0.239	0.001072
0.239	0.000893
0.24	0.000664
0.241	0.000429
0.241	0.000195
0.242	0.000565
0.243	0.001162
0.243	0.001716
0.244	0.002237
0.245	0.00274
0.245	0.003373
0.246	0.004233
0.247	0.00515
0.247	0.006075
0.248	0.006924
0.249	0.007374
0.249	0.007482
0.25	0.00759
0.251	0.007632
0.251	0.00778
0.252	0.00813
0.253	0.008531
0.253	0.008929
0.254	0.009434
0.255	0.010083
0.255	0.010757
0.256	0.011424
0.256	0.012181
0.257	0.012439
0.258	0.012486
0.258	0.012517
0.259	0.012609
0.26	0.013695
0.26	0.015872
0.261	0.018132
0.262	0.020413
0.262	0.022626
0.263	0.024595
0.264	0.026489
0.264	0.028388
0.265	0.030335
0.266	0.032357
0.266	0.033572
0.267	0.034666
0.268	0.035766
0.268	0.036818
0.269	0.038776
0.27	0.041046
0.27	0.043374
0.271	0.045792
0.272	0.049253
0.272	0.052934
0.273	0.056628
0.274	0.060326
0.274	0.063865
0.275	0.066424
0.276	0.068781
0.276	0.071141
0.277	0.073505
0.278	0.07639
0.278	0.079351
0.279	0.082292
0.28	0.085268
0.28	0.08856
0.281	0.092042
0.281	0.095567
0.282	0.099085
0.283	0.102313
0.283	0.104454
0.284	0.106565
0.285	0.108723
0.285	0.110853
0.286	0.11388
0.287	0.117286
0.287	0.120764
0.288	0.124184
0.289	0.127831
0.289	0.131848
0.29	0.135809
0.291	0.139732
0.291	0.143686
0.292	0.147365
0.293	0.150359
0.293	0.153323
0.294	0.156273
0.295	0.159312
0.295	0.162617
0.296	0.165959
0.297	0.169263
0.297	0.172357
0.298	0.175319
0.299	0.17796
0.299	0.180552
0.3	0.183259
0.301	0.186119
0.301	0.189358
0.302	0.192856
0.303	0.196377
0.303	0.1999
0.304	0.203272
0.305	0.205878
0.305	0.207822
0.306	0.209763
0.307	0.211476
0.307	0.212702
0.308	0.213705
0.308	0.214795
0.309	0.215885
0.31	0.21721
0.31	0.218717
0.311	0.219886
0.312	0.221053
0.312	0.222352
0.313	0.223921
0.314	0.225421
0.314	0.226763
0.315	0.228099
0.316	0.229436
0.316	0.231148
0.317	0.233776
0.318	0.236398
0.318	0.239033
0.319	0.241442
0.32	0.24308
0.32	0.244418
0.321	0.245663
0.322	0.246237
0.322	0.245623
0.323	0.244668
0.324	0.243711
0.324	0.242974
0.325	0.242853
0.326	0.243094
0.326	0.243395
0.327	0.243687
0.328	0.243841
0.328	0.243713
0.329	0.243444
0.33	0.243177
0.33	0.242888
0.331	0.242503
0.332	0.24203
0.332	0.241547
0.333	0.240936
0.333	0.239713
0.334	0.237689
0.335	0.235407
0.335	0.233144
0.336	0.231075
0.337	0.229408
0.337	0.227926
0.338	0.226451
0.339	0.224803
0.339	0.222862
0.34	0.221181
0.341	0.219919
0.341	0.218653
0.342	0.217944
0.343	0.217615
0.343	0.21692
0.344	0.216187
0.345	0.215311
0.345	0.213999
0.346	0.212184
0.347	0.210158
0.347	0.208175
0.348	0.206561
0.349	0.205447
0.349	0.204487
0.35	0.203535
0.351	0.202478
0.351	0.201255
0.352	0.199923
0.353	0.198475
0.353	0.196934
0.354	0.195217
0.355	0.193228
0.355	0.192013
0.356	0.190793
0.357	0.189613
0.357	0.188323
0.358	0.186647
0.358	0.184805
0.359	0.182956
0.36	0.181488
0.36	0.180552
0.361	0.179778
0.362	0.179009
0.362	0.178269
0.363	0.177633
0.364	0.177063
0.364	0.176499
0.365	0.175936
0.366	0.175234
0.366	0.175009
0.367	0.174969
0.368	0.17493
0.368	0.174899
0.369	0.174548
0.37	0.17399
0.37	0.173401
0.371	0.17281
0.372	0.172332
0.372	0.172278
0.373	0.172394
0.374	0.172509
0.374	0.172654
0.375	0.172088
0.376	0.171142
0.376	0.170194
0.377	0.169245
0.378	0.168712
0.378	0.168578
0.379	0.168534
0.38	0.16849
0.38	0.168131
0.381	0.166872
0.382	0.165241
0.382	0.163595
0.383	0.161941
0.384	0.160586
0.384	0.1595
0.385	0.158467
0.385	0.157438
0.386	0.156594
0.387	0.156978
0.387	0.158016
0.388	0.159113
0.389	0.160212
0.389	0.16044
0.39	0.160128
0.391	0.159739
0.391	0.15935
0.392	0.159373
0.393	0.159633
0.393	0.159802
0.394	0.159939
0.395	0.160078
0.395	0.159715
0.396	0.158996
0.397	0.158216
0.397	0.157441
0.398	0.156504
0.399	0.155301
0.399	0.154093
0.4	0.152901
0.401	0.151708
0.401	0.150684
0.402	0.149769
0.403	0.148863
0.403	0.147962
0.404	0.14728
0.405	0.147206
0.405	0.147388
0.406	0.147605
0.407	0.147835
0.407	0.148128
0.408	0.148486
0.409	0.148795
0.409	0.149105
0.41	0.149383
0.41	0.149396
0.411	0.149049
0.412	0.148679
0.412	0.14831
0.413	0.148483
0.414	0.149761
0.414	0.151381
0.415	0.152994
0.416	0.154371
0.416	0.154857
0.417	0.15444
0.418	0.154012
0.418	0.153584
0.419	0.152973
0.42	0.151545
0.42	0.149522
0.421	0.147489
0.422	0.145552
0.422	0.144468
0.423	0.145403
0.424	0.14643
0.424	0.147463
0.425	0.14818
0.426	0.1466
0.426	0.143649
0.427	0.140694
0.428	0.137812
0.428	0.135677
0.429	0.135176
0.43	0.134884
0.43	0.134592
0.431	0.134307
0.432	0.134215
0.432	0.134735
0.433	0.13525
0.434	0.135679
0.434	0.135554
0.435	0.134611
0.436	0.133594
0.436	0.132576
0.437	0.131649
0.437	0.130764
0.438	0.12957
0.439	0.128376
0.439	0.127274
0.44	0.126393
0.441	0.125617
0.441	0.124828
0.442	0.124039
0.443	0.123324
0.443	0.122804
0.444	0.122417
0.445	0.122031
0.445	0.121651
0.446	0.120885
0.447	0.119464
0.447	0.117973
0.448	0.116483
0.449	0.115015
0.449	0.113998
0.45	0.113632
0.451	0.113266
0.451	0.112863
0.452	0.112616
0.453	0.112728
0.453	0.112926
0.454	0.113124
0.455	0.112528
0.455	0.110221
0.456	0.107065
0.457	0.103921
0.457	0.101221
0.458	0.10016
0.459	0.101014
0.459	0.102455
0.46	0.104011
0.461	0.105415
0.461	0.105568
0.462	0.104656
0.462	0.103737
0.463	0.103061
0.464	0.103146
0.464	0.103676
0.465	0.104231
0.466	0.104798
0.466	0.10562
0.467	0.107153
0.468	0.109027
0.468	0.110892
0.469	0.112246
0.47	0.112755
0.47	0.112928
0.471	0.113066
0.472	0.113204
0.472	0.113637
0.473	0.113908
0.474	0.114119
0.474	0.114328
0.475	0.113965
0.476	0.112811
0.476	0.111459
0.477	0.110096
0.478	0.108735
0.478	0.108818
0.479	0.109346
0.48	0.109858
0.48	0.110377
0.481	0.109965
0.482	0.109081
0.482	0.108208
0.483	0.107363
0.484	0.106787
0.484	0.107485
0.485	0.108772
0.486	0.110089
0.486	0.111415
0.487	0.112487
0.487	0.114216
0.488	0.116412
0.489	0.118641
0.489	0.120581
0.49	0.121161
0.491	0.120361
0.491	0.119232
0.492	0.118096
0.493	0.117546
0.493	0.117718
0.494	0.118054
0.495	0.118389
0.495	0.118531
0.496	0.117747
0.497	0.116336
0.497	0.114835
0.498	0.113348
0.499	0.111188
0.499	0.108761
0.5	0.106304
0.501	0.103851
0.501	0.101862
0.502	0.101021
0.503	0.100626
0.503	0.100281
0.504	0.099934
0.505	0.098405
0.505	0.096029
0.506	0.093459
0.507	0.090906
0.507	0.088733
0.508	0.088264
0.509	0.08866
0.509	0.089164
0.51	0.089664
0.511	0.090912
0.511	0.09081
0.512	0.090419
0.513	0.090016
0.513	0.089403
0.514	0.088925
0.514	0.089243
0.515	0.090018
0.516	0.090793
0.516	0.090677
0.517	0.088819
0.518	0.086119
0.518	0.083428
0.519	0.081021
0.52	0.079382
0.52	0.078325
0.521	0.077323
0.522	0.076322
0.522	0.075433
0.523	0.075058
0.524	0.075268
0.524	0.075477
0.525	0.075654
0.526	0.075509
0.526	0.074764
0.527	0.073953
0.528	0.073192
0.528	0.072825
0.529	0.073273
0.53	0.073996
0.53	0.074719
0.531	0.075335
0.532	0.075756
0.532	0.076565
0.533	0.077439
0.534	0.078396
0.534	0.079705
0.535	0.081235
0.536	0.082388
0.536	0.083539
0.537	0.08448
0.538	0.085445
0.538	0.08726
0.539	0.089184
0.539	0.090918
0.54	0.091894
0.541	0.091692
0.541	0.090807
0.542	0.089925
0.543	0.089174
0.543	0.088151
0.544	0.086607
0.545	0.085006
0.545	0.083586
0.546	0.082819
0.547	0.082807
0.547	0.083085
0.548	0.083363
0.549	0.082916
0.549	0.082471
0.55	0.082668
0.551	0.082865
0.551	0.08322
0.552	0.083636
0.553	0.083654
0.553	0.083383
0.554	0.083111
0.555	0.082475
0.555	0.081496
0.556	0.080484
0.557	0.079472
0.557	0.078707
0.558	0.07856
0.559	0.078781
0.559	0.079032
0.56	0.079284
0.561	0.079347
0.561	0.07881
0.562	0.077967
0.563	0.077122
0.563	0.076336
0.564	0.075955
0.564	0.07595
0.565	0.076045
0.566	0.076141
0.566	0.076188
0.567	0.075746
0.568	0.074586
0.568	0.073418
0.569	0.07211
0.57	0.070804
0.57	0.069763
0.571	0.068793
0.572	0.067824
0.572	0.067779
0.573	0.068743
0.574	0.069918
0.574	0.071096
0.575	0.072071
0.576	0.072334
0.576	0.072489
0.577	0.072642
0.578	0.072793
0.578	0.072073
0.579	0.070687
0.58	0.069299
0.58	0.067945
0.581	0.067148
0.582	0.068782
0.582	0.070568
0.583	0.072344
0.584	0.074098
0.584	0.074538
0.585	0.074104
0.586	0.07367
0.586	0.073233
0.587	0.073215
0.588	0.074841
0.588	0.076653
0.589	0.078474
0.59	0.080301
0.59	0.081058
0.591	0.081085
0.591	0.081076
0.592	0.081066
0.593	0.080927
0.593	0.080771
0.594	0.080643
0.595	0.080518
0.595	0.080392
0.596	0.080586
0.597	0.080692
0.597	0.080798
0.598	0.080887
0.599	0.080526
0.599	0.079664
0.6	0.078786
0.601	0.077906
0.601	0.077212
0.602	0.078316
0.603	0.079827
0.603	0.081348
0.604	0.082755
0.605	0.083215
0.605	0.081907
0.606	0.080518
0.607	0.079126
0.607	0.077791
0.608	0.07685
0.609	0.076364
0.609	0.075878
0.61	0.075422
0.611	0.07527
0.611	0.075835
0.612	0.076506
0.613	0.077178
0.613	0.077741
0.614	0.077524
0.615	0.076356
0.615	0.07519
0.616	0.073996
0.616	0.072728
0.617	0.072294
0.618	0.072248
0.618	0.072206
0.619	0.072377
0.62	0.073043
0.62	0.073108
0.621	0.072933
0.622	0.072757
0.622	0.072613
0.623	0.073017
0.624	0.073651
0.624	0.074304
0.625	0.07489
0.626	0.075408
0.626	0.076018
0.627	0.076657
0.628	0.077294
0.628	0.077193
0.629	0.076383
0.63	0.075388
0.63	0.07438
0.631	0.073488
0.632	0.073374
0.632	0.073846
0.633	0.074443
0.634	0.07504
0.634	0.075374
0.635	0.074389
0.636	0.072702
0.636	0.070951
0.637	0.069211
0.638	0.068012
0.638	0.067873
0.639	0.068149
0.64	0.068426
0.64	0.068988
0.641	0.069783
0.641	0.070591
0.642	0.07139
0.643	0.072159
0.643	0.072487
0.644	0.07239
0.645	0.072192
0.645	0.071994
0.646	0.071578
0.647	0.071046
0.647	0.070498
0.648	0.06995
0.649	0.0695
0.649	0.07015
0.65	0.071195
0.651	0.072277
0.651	0.073354
0.652	0.07465
0.653	0.075423
0.653	0.07608
0.654	0.076734
0.655	0.07719
0.655	0.076768
0.656	0.076212
0.657	0.075654
0.657	0.075093
0.658	0.074823
0.659	0.074853
0.659	0.074912
0.66	0.074972
0.661	0.07489
0.661	0.074412
0.662	0.074121
0.663	0.073848
0.663	0.073576
0.664	0.073834
0.665	0.073838
0.665	0.073824
0.666	0.073811
0.667	0.073643
0.667	0.073488
0.668	0.073497
0.668	0.073511
0.669	0.073527
0.67	0.074149
0.67	0.074801
0.671	0.07543
0.672	0.076014
0.672	0.076613
0.673	0.076976
0.674	0.077065
0.674	0.077076
0.675	0.077086
0.676	0.076658
0.676	0.076419
0.677	0.076236
0.678	0.076052
0.678	0.076208
0.679	0.077207
0.68	0.078491
0.68	0.079774
0.681	0.080781
0.682	0.080114
0.682	0.07852
0.683	0.076938
0.684	0.075507
0.684	0.074684
0.685	0.074084
0.686	0.073227
0.686	0.07237
0.687	0.071498
0.688	0.07081
0.688	0.070783
0.689	0.070756
0.69	0.070666
0.69	0.070307
0.691	0.069633
0.692	0.068881
0.692	0.06813
0.693	0.06753
0.693	0.06773
0.694	0.068995
0.695	0.070262
0.695	0.071514
0.696	0.072537
0.697	0.072882
0.697	0.072984
0.698	0.073088
0.699	0.073233
0.699	0.073604
0.7	0.074272
0.701	0.074941
0.701	0.07565
0.702	0.076344
0.703	0.07663
0.703	0.076867
0.704	0.077063
0.705	0.07677
0.705	0.075526
0.706	0.074264
0.707	0.072993
0.707	0.071705
0.708	0.070578
0.709	0.069826
0.709	0.069118
0.71	0.068583
0.711	0.068575
0.711	0.068712
0.712	0.068573
0.713	0.068434
0.713	0.068197
0.714	0.068595
0.715	0.069766
0.715	0.070929
0.716	0.072008
0.717	0.07237
0.717	0.071627
0.718	0.070436
0.718	0.06924
0.719	0.067542
0.72	0.065354
0.72	0.063122
0.721	0.060902
0.722	0.058902
0.722	0.058061
0.723	0.058198
0.724	0.05841
0.724	0.058615
0.725	0.058342
0.726	0.057125
0.726	0.055032
0.727	0.052784
0.728	0.05047
0.728	0.048283
0.729	0.046599
0.73	0.04496
0.73	0.043332
0.731	0.041707
0.732	0.040162
0.732	0.038625
0.733	0.037097
0.734	0.0356
0.734	0.034352
0.735	0.033429
0.736	0.032414
0.736	0.031399
0.737	0.030358
0.738	0.029033
0.738	0.02876
0.739	0.028487
0.74	0.028214
0.74	0.02798
0.741	0.027952
0.742	0.027949
0.742	0.027945
0.743	0.027942
0.744	0.027773
0.744	0.026808
0.745	0.025837
0.745	0.02486
0.746	0.023876
0.747	0.024402
0.747	0.024982
0.748	0.025564
0.749	0.026144
0.749	0.026441
0.75	0.0269
0.751	0.02736
0.751	0.027823
0.752	0.028259
0.753	0.028378
0.753	0.028882
0.754	0.029382
0.755	0.029899
0.755	0.030407
0.756	0.02993
0.757	0.029453
0.757	0.02898
0.758	0.028798
0.759	0.030348
0.759	0.032649
0.76	0.034956
0.761	0.037138
0.761	0.038669
0.762	0.03943
0.763	0.04019
0.763	0.040955
0.764	0.041537
0.765	0.041557
0.765	0.041442
0.766	0.041328
0.767	0.041197
0.767	0.041125
0.768	0.041177
0.769	0.041228
0.769	0.04128
0.77	0.041096
0.77	0.040605
0.771	0.040054
0.772	0.039506
0.772	0.039162
0.773	0.039296
0.774	0.039719
0.774	0.04014
0.775	0.040561
0.776	0.041023
0.776	0.041504
0.777	0.041908
0.778	0.042303
0.778	0.04277
0.779	0.043464
0.78	0.043664
0.78	0.043881
0.781	0.044107
0.782	0.044335
0.782	0.045101
0.783	0.046367
0.784	0.04767
0.784	0.048976
0.785	0.050497
0.786	0.053362
0.786	0.056248
0.787	0.059123
0.788	0.061734
0.788	0.063469
0.789	0.064761
0.79	0.066052
0.79	0.067494
0.791	0.069041
0.792	0.070464
0.792	0.071837
0.793	0.073211
0.794	0.074022
0.794	0.074676
0.795	0.075535
0.795	0.076389
0.796	0.07724
0.797	0.078421
0.797	0.079915
0.798	0.081482
0.799	0.083041
0.799	0.084115
0.8	0.084304
0.801	0.084083
0.801	0.083862
0.802	0.083517
0.803	0.083263
0.803	0.083346
0.804	0.083556
0.805	0.083767
0.805	0.084116
0.806	0.084325
0.807	0.084208
0.807	0.08409
0.808	0.083962
0.809	0.083637
0.809	0.083098
0.81	0.082539
0.811	0.081979
0.811	0.081782
0.812	0.081665
0.813	0.081277
0.813	0.08089
0.814	0.080526
0.815	0.080135
0.815	0.079688
0.816	0.079228
0.817	0.078705
0.817	0.077554
0.818	0.0759
0.819	0.07418
0.819	0.072458
0.82	0.070627
0.821	0.068854
0.821	0.067209
0.822	0.065604
0.822	0.063981
0.823	0.062066
0.824	0.059677
0.824	0.057092
0.825	0.054512
0.826	0.052717
0.826	0.052488
0.827	0.052831
0.828	0.053172
0.828	0.053035
0.829	0.051964
0.83	0.050582
0.83	0.049202
0.831	0.047852
0.832	0.046835
0.832	0.046346
0.833	0.046194
0.834	0.046125
0.834	0.046194
0.835	0.046729
0.836	0.047811
0.836	0.049285
0.837	0.050731
0.838	0.051841
0.838	0.05213
0.839	0.051872
0.84	0.051558
0.84	0.051556
0.841	0.052394
0.842	0.053555
0.842	0.054732
0.843	0.055892
0.844	0.056841
0.844	0.057055
0.845	0.056366
0.846	0.055575
0.846	0.054601
0.847	0.05279
0.847	0.050617
0.848	0.048419
0.849	0.046251
0.849	0.044294
0.85	0.042924
0.851	0.04235
0.851	0.041773
0.852	0.041383
0.853	0.042015
0.853	0.043221
0.854	0.044525
0.855	0.045841
0.855	0.047074
0.856	0.047972
0.857	0.048958
0.857	0.049949
0.858	0.050836
0.859	0.050976
0.859	0.049854
0.86	0.048525
0.861	0.047195
0.861	0.046016
0.862	0.045517
0.863	0.045702
0.863	0.045887
0.864	0.046057
0.865	0.046004
0.865	0.045683
0.866	0.045362
0.867	0.04503
0.867	0.044333
0.868	0.043128
0.869	0.041775
0.869	0.040421
0.87	0.039096
0.871	0.038216
0.871	0.037704
0.872	0.037194
0.872	0.036686
0.873	0.035812
0.874	0.034389
0.874	0.032766
0.875	0.031149
0.876	0.029561
0.876	0.028349
0.877	0.027412
0.878	0.026477
0.878	0.025547
0.879	0.025173
0.88	0.025452
0.88	0.025901
0.881	0.02635
0.882	0.026886
0.882	0.027365
0.883	0.02777
0.884	0.028175
0.884	0.028464
0.885	0.027602
0.886	0.02594
0.886	0.024096
0.887	0.02214
0.888	0.020267
0.888	0.018994
0.889	0.0181
0.89	0.017203
0.89	0.016308
0.891	0.015678
0.892	0.015531
0.892	0.015556
0.893	0.015581
0.894	0.016929
0.894	0.018858
0.895	0.020825
0.896	0.022783
0.896	0.024246
0.897	0.024906
0.898	0.025592
0.898	0.026268
0.899	0.026894
0.899	0.026685
0.9	0.026729
0.901	0.026772
0.901	0.026835
0.902	0.027152
0.903	0.02769
0.903	0.028275
0.904	0.028859
0.905	0.029284
0.905	0.02876
0.906	0.027892
0.907	0.027026
0.907	0.026177
0.908	0.025719
0.909	0.02543
0.909	0.025146
0.91	0.02487
0.911	0.024799
0.911	0.025146
0.912	0.025465
0.913	0.025784
0.913	0.026038
0.914	0.025616
0.915	0.024733
0.915	0.023674
0.916	0.022597
0.917	0.021565
0.917	0.020817
0.918	0.020659
0.919	0.0205
0.919	0.020394
0.92	0.020367
0.921	0.019976
0.921	0.019471
0.922	0.018988
0.923	0.01875
0.923	0.018989
0.924	0.019219
0.924	0.019449
0.925	0.019775
0.926	0.019828
0.926	0.018864
0.927	0.017903
0.928	0.016955
0.928	0.016268
0.929	0.016305
0.93	0.016855
0.93	0.017405
0.931	0.01754
0.932	0.017183
0.932	0.01723
0.933	0.017278
0.934	0.017337
0.934	0.017349
0.935	0.017179
0.936	0.016901
0.936	0.016625
0.937	0.016445
0.938	0.016821
0.938	0.017781
0.939	0.018683
0.94	0.019615
0.94	0.020975
0.941	0.022704
0.942	0.024297
0.942	0.025899
0.943	0.027404
0.944	0.027355
0.944	0.026885
0.945	0.026416
0.946	0.025959
0.946	0.025698
0.947	0.026237
0.948	0.026926
0.948	0.027612
0.949	0.028231
0.949	0.028004
0.95	0.027676
0.951	0.027349
0.951	0.027026
0.952	0.026953
0.953	0.027236
0.953	0.027367
0.954	0.027499
0.955	0.027629
0.955	0.029113
0.956	0.030158
0.957	0.031195
0.957	0.032227
0.958	0.033134
0.959	0.033214
0.959	0.033141
0.96	0.033064
0.961	0.032987
0.961	0.032396
0.962	0.031523
0.963	0.030647
0.963	0.029766
0.964	0.028947
0.965	0.029148
0.965	0.029606
0.966	0.030071
0.967	0.030422
0.967	0.030009
0.968	0.029361
0.969	0.028713
0.969	0.028071
0.97	0.027429
0.971	0.026709
0.971	0.025962
0.972	0.025215
0.973	0.025107
0.973	0.026465
0.974	0.027325
0.975	0.028179
0.975	0.028624
0.976	0.028415
0.976	0.028597
0.977	0.028779
0.978	0.02896
0.978	0.029175
0.979	0.029392
0.98	0.029526
0.98	0.02966
0.981	0.029876
0.982	0.03071
0.982	0.032309
0.983	0.033967
0.984	0.035621
0.984	0.036794
0.985	0.036997
0.986	0.036791
0.986	0.036584
0.987	0.036495
0.988	0.036099
0.988	0.035019
0.989	0.033844
0.99	0.032665
0.99	0.031852
0.991	0.03175
0.992	0.031965
0.992	0.032167
0.993	0.03237
0.994	0.032701
0.994	0.03349
0.995	0.034408
0.996	0.035332
0.996	0.036442
0.997	0.038043
0.998	0.039752
0.998	0.041461
0.999	0.042897
1	0.044008
1	0.045218
1.001	0.046511
1.001	0.047796
1.002	0.04849
1.003	0.048921
1.003	0.04934
1.004	0.049754
1.005	0.050372
1.005	0.048779
1.006	0.046829
1.007	0.044867
1.007	0.043
1.008	0.042785
1.009	0.043517
1.009	0.044334
1.01	0.045147
1.011	0.045908
1.011	0.046461
1.012	0.046938
1.013	0.047407
1.013	0.047876
1.014	0.048181
1.015	0.048191
1.015	0.048159
1.016	0.048126
1.017	0.046814
1.017	0.04589
1.018	0.045168
1.019	0.044459
1.019	0.043912
1.02	0.043401
1.021	0.042536
1.021	0.041599
1.022	0.040677
1.023	0.041799
1.023	0.043089
1.024	0.044295
1.025	0.045507
1.025	0.046178
1.026	0.045535
1.026	0.044764
1.027	0.043988
1.028	0.043216
1.028	0.042551
1.029	0.041322
1.03	0.040032
1.03	0.038737
1.031	0.037573
1.032	0.037284
1.032	0.037776
1.033	0.038278
1.034	0.038717
1.034	0.038462
1.035	0.038714
1.036	0.038968
1.036	0.03923
1.037	0.039553
1.038	0.039803
1.038	0.03991
1.039	0.040017
1.04	0.040063
1.04	0.039557
1.041	0.038475
1.042	0.037389
1.042	0.036351
1.043	0.035736
1.044	0.035685
1.044	0.035657
1.045	0.03563
1.046	0.035625
1.046	0.036237
1.047	0.036928
1.048	0.037683
1.048	0.038461
1.049	0.039125
1.05	0.04078
1.05	0.042896
1.051	0.045054
1.052	0.047168
1.052	0.048741
1.053	0.049928
1.053	0.051046
1.054	0.052161
1.055	0.053288
1.055	0.052759
1.056	0.051256
1.057	0.049599
1.057	0.047879
1.058	0.045968
1.059	0.044861
1.059	0.044164
1.06	0.043468
1.061	0.044108
1.061	0.045936
1.062	0.048023
1.063	0.050106
1.063	0.05179
1.064	0.05159
1.065	0.05022
1.065	0.048744
1.066	0.047258
1.067	0.046416
1.067	0.04661
1.068	0.047305
1.069	0.048073
1.069	0.048772
1.07	0.049229
1.071	0.04946
1.071	0.049638
1.072	0.049814
1.073	0.050041
1.073	0.050639
1.074	0.051405
1.075	0.05218
1.075	0.052974
1.076	0.053531
1.077	0.053569
1.077	0.053477
1.078	0.053385
1.078	0.053362
1.079	0.052764
1.08	0.05197
1.08	0.051166
1.081	0.04977
1.082	0.047504
1.082	0.045289
1.083	0.043065
1.084	0.040862
1.084	0.038503
1.085	0.036573
1.086	0.0347
1.086	0.032827
1.087	0.031435
1.088	0.030383
1.088	0.029344
1.089	0.028298
1.09	0.027424
1.09	0.028092
1.091	0.029587
1.092	0.03108
1.092	0.032573
1.093	0.03287
1.094	0.030619
1.094	0.027532
1.095	0.024428
1.096	0.02173
1.096	0.020974
1.097	0.022638
1.098	0.024302
1.098	0.025934
1.099	0.027289
1.1	0.027542
1.1	0.027599
1.101	0.027635
1.102	0.027553
1.102	0.026395
1.103	0.025185
1.103	0.024008
1.104	0.022829
1.105	0.022599
1.105	0.02325
1.106	0.023895
1.107	0.024538
1.107	0.024941
1.108	0.024376
1.109	0.023655
1.109	0.022936
1.11	0.022375
1.111	0.022352
1.111	0.022716
1.112	0.023066
1.113	0.023412
1.113	0.023394
1.114	0.023254
1.115	0.023717
1.115	0.024179
1.116	0.02504
1.117	0.02683
1.117	0.029123
1.118	0.031424
1.119	0.0337
1.119	0.035387
1.12	0.036107
1.121	0.036621
1.121	0.037135
1.122	0.037828
1.123	0.038642
1.123	0.039135
1.124	0.039631
1.125	0.040126
1.125	0.040987
1.126	0.042642
1.127	0.044593
1.127	0.04655
1.128	0.048107
1.129	0.048295
1.129	0.047362
1.13	0.04643
1.13	0.045497
1.131	0.044983
1.132	0.045065
1.132	0.045246
1.133	0.045427
1.134	0.045635
1.134	0.04653
1.135	0.048045
1.136	0.049554
1.136	0.051127
1.137	0.052847
1.138	0.054127
1.138	0.055028
1.139	0.055923
1.14	0.056555
1.14	0.057514
1.141	0.058863
1.142	0.060253
1.142	0.061688
1.143	0.063285
1.144	0.064504
1.144	0.065485
1.145	0.066465
1.146	0.066972
1.146	0.067978
1.147	0.069363
1.148	0.070744
1.148	0.072238
1.149	0.074124
1.15	0.075751
1.15	0.077154
1.151	0.078561
1.152	0.079586
1.152	0.08051
1.153	0.081451
1.154	0.082386
1.154	0.083378
1.155	0.084318
1.155	0.084684
1.156	0.084369
1.157	0.084054
1.157	0.083465
1.158	0.082227
1.159	0.08088
1.159	0.079536
1.16	0.078201
1.161	0.077135
1.161	0.076791
1.162	0.076888
1.163	0.076984
1.163	0.077095
1.164	0.077044
1.165	0.076474
1.165	0.075907
1.166	0.075365
1.167	0.074997
1.167	0.074945
1.168	0.074967
1.169	0.074989
1.169	0.074898
1.17	0.074081
1.171	0.072234
1.171	0.070383
1.172	0.068572
1.173	0.067062
1.173	0.06624
1.174	0.065655
1.175	0.065065
1.175	0.064188
1.176	0.061868
1.177	0.059011
1.177	0.056127
1.178	0.053404
1.179	0.051449
1.179	0.050472
1.18	0.049849
1.18	0.04923
1.181	0.048508
1.182	0.04707
1.182	0.044596
1.183	0.042121
1.184	0.039506
1.184	0.036662
1.185	0.034121
1.186	0.031984
1.186	0.029845
1.187	0.027722
1.188	0.025518
1.188	0.023203
1.189	0.020883
1.19	0.018701
1.19	0.017593
1.191	0.017724
1.192	0.018051
1.192	0.018378
1.193	0.018596
1.194	0.018586
1.194	0.018459
1.195	0.018332
1.196	0.018205
1.196	0.018347
1.197	0.018737
1.198	0.01912
1.198	0.019503
1.199	0.019547
1.2	0.018959
1.2	0.018092
1.201	0.017223
1.202	0.016354
1.202	0.016346
1.203	0.017099
1.204	0.017951
1.204	0.018801
1.205	0.019342
1.206	0.019112
1.206	0.018564
1.207	0.018025
1.207	0.017461
1.208	0.017214
1.209	0.017673
1.209	0.018103
1.21	0.018536
1.211	0.018698
1.211	0.018376
1.212	0.017884
1.213	0.017393
1.213	0.016937
1.214	0.016982
1.215	0.017223
1.215	0.017468
1.216	0.01771
1.217	0.018389
1.217	0.019719
1.218	0.021093
1.219	0.022456
1.219	0.023638
1.22	0.024024
1.221	0.024398
1.221	0.02477
1.222	0.02513
1.223	0.02492
1.223	0.023554
1.224	0.022208
1.225	0.020861
1.225	0.019759
1.226	0.019244
1.227	0.018859
1.227	0.018467
1.228	0.018086
1.229	0.017471
1.229	0.016284
1.23	0.015095
1.231	0.013902
1.231	0.012185
1.232	0.010389
1.232	0.008928
1.233	0.007477
1.234	0.006067
1.234	0.004991
1.235	0.002976
1.236	0.000834
1.236	-0.0013
1.237	-0.00316
1.238	-0.0045
1.238	-0.00525
1.239	-0.00601
1.24	-0.00675
1.24	-0.0075
1.241	-0.00784
1.242	-0.00813
1.242	-0.00837
1.243	-0.00811
1.244	-0.00733
1.244	-0.00661
1.245	-0.00589
1.246	-0.00523
1.246	-0.00486
1.247	-0.00489
1.248	-0.00492
1.248	-0.0051
1.249	-0.00601
1.25	-0.0074
1.25	-0.00885
1.251	-0.01031
1.252	-0.01182
1.252	-0.01331
1.253	-0.01422
1.254	-0.01513
1.254	-0.0158
1.255	-0.01547
1.256	-0.01455
1.256	-0.01358
1.257	-0.01263
1.257	-0.01186
1.258	-0.01169
1.259	-0.01182
1.259	-0.01194
1.26	-0.01205
1.261	-0.01247
1.261	-0.01285
1.262	-0.01323
1.263	-0.01362
1.263	-0.01396
1.264	-0.01344
1.265	-0.01232
1.265	-0.01112
1.266	-0.00993
1.267	-0.00875
1.267	-0.00787
1.268	-0.00702
1.269	-0.00618
1.269	-0.00532
1.27	-0.00459
1.271	-0.00408
1.271	-0.00361
1.272	-0.00315
1.273	-0.00223
1.273	-0.00107
1.274	0.000144
1.275	0.001361
1.275	0.002423
1.276	0.002455
1.277	0.001621
1.277	0.000593
1.278	-0.00044
1.279	-0.00047
1.279	0.000316
1.28	0.001262
1.281	0.00221
1.281	0.0027
1.282	0.00252
1.283	0.002551
1.283	0.002709
1.284	0.002867
1.284	0.004179
1.285	0.006383
1.286	0.00875
1.286	0.011114
1.287	0.013062
1.288	0.013401
1.288	0.013051
1.289	0.012623
1.29	0.012192
1.29	0.011978
1.291	0.012207
1.292	0.012482
1.292	0.012761
1.293	0.013079
1.294	0.013827
1.294	0.014743
1.295	0.015663
1.296	0.016588
1.296	0.018176
1.297	0.019666
1.298	0.021148
1.298	0.022628
1.299	0.024062
1.3	0.025285
1.3	0.026493
1.301	0.027704
1.302	0.028898
1.302	0.029716
1.303	0.030363
1.304	0.031003
1.304	0.031659
1.305	0.032458
1.306	0.033288
1.306	0.033984
1.307	0.034676
1.308	0.035299
1.308	0.035328
1.309	0.035594
1.309	0.03586
1.31	0.036127
1.311	0.036131
1.311	0.034698
1.312	0.032954
1.313	0.031317
1.313	0.029776
1.314	0.028889
1.315	0.029439
1.315	0.030221
[truncated: 47,882 more rows]

## Sheet: YFP
Days of expression	Fluorescence intensity (RFU)
1	210
2	8304
3	95732
4	98392
5	99183

## Sheet: Insect cell viability
Days of expression	% Cell viability
1	100
5	73
