# Supplementary material for: Purified zymogens reveal mechanisms of snake venom metalloproteinase auto-activation
Source: eLife. 2026 Jun 10;15:RP109112. doi: 10.7554/eLife.109112 (PMC13252954; doi:10.7554/eLife.109112)
Supplement: Figure 3—source data 5. [file elife-109112-fig3-data5.xlsx]

## Sheet: IMAC
Volume (mL)	Abs 280 nm (mAU)	Volume (mL)	%B
0	0.37488	0	17.0525
0.004	5.41852	0.042	17.0516
0.008	6.38581	0.083	17.0553
0.012	6.91924	0.125	17.0307
0.017	7.00065	0.166	16.9439
0.021	6.98942	0.208	16.8863
0.025	6.99066	0.249	16.8902
0.029	6.95271	0.291	16.9053
0.033	6.86636	0.332	16.9189
0.037	6.75791	0.374	6.21852
0.042	6.62845	0.415	0.992266
0.046	6.50723	0.457	6.86434
0.05	6.3835	0.498	17.0489
0.054	6.26738	0.54	18.668
0.058	6.18588	0.581	19.0337
0.062	6.08757	0.623	19.2071
0.066	5.99557	0.664	19.3044
0.071	5.92002	0.706	19.364
0.075	5.85852	0.747	19.406
0.079	5.8018	0.789	19.4437
0.083	5.74712	0.83	19.4625
0.087	5.69012	0.872	19.4673
0.091	5.63173	0.913	19.4636
0.095	5.58367	0.955	19.4457
0.1	5.54815	0.997	19.4198
0.104	5.51067	1.038	19.3931
0.108	5.47351	1.08	19.3727
0.112	5.44472	1.121	19.3499
0.116	5.41781	1.163	19.3261
0.12	5.38639	1.204	19.305
0.125	5.35475	1.246	19.2831
0.129	5.32804	1.287	19.2613
0.133	5.30625	1.329	19.2367
0.137	5.27554	1.37	19.2191
0.141	5.24522	1.412	19.2065
0.145	5.21445	1.453	19.1911
0.149	5.19939	1.495	19.1714
0.154	5.18228	1.536	19.1523
0.158	5.16257	1.578	19.1319
0.162	5.14276	1.619	19.1141
0.166	5.11549	1.661	19.0974
0.17	5.08294	1.702	19.0826
0.174	5.05075	1.744	19.0678
0.179	5.0188	1.785	19.0515
0.183	4.98797	1.827	19.0352
0.187	4.96187	1.868	19.0199
0.191	5.01148	1.91	19.0044
0.195	5.11293	1.952	18.9879
0.199	5.21834	1.993	18.9699
0.203	5.32655	2.035	18.9534
0.208	5.45962	2.076	18.9372
0.212	5.69028	2.118	18.9231
0.216	5.92887	2.159	18.9069
0.22	6.16994	2.201	18.8881
0.224	6.41631	2.242	18.8705
0.228	8.64829	2.284	18.85
0.232	11.9061	2.325	18.8284
0.237	15.2358	2.367	18.8055
0.241	18.575	2.408	18.7817
0.245	21.8689	2.45	18.7616
0.249	24.9429	2.491	18.7418
0.253	28.0391	2.533	18.7194
0.257	31.1406	2.574	18.6982
0.262	34.2444	2.616	18.675
0.266	37.3574	2.657	18.6542
0.27	40.4837	2.699	18.6269
0.274	43.6026	2.74	18.5968
0.278	46.722	2.782	18.5685
0.282	49.8512	2.823	18.5398
0.286	53.0123	2.865	18.5086
0.291	56.1819	2.907	18.4761
0.295	59.2839	2.948	18.4404
0.299	62.3226	2.99	18.4065
0.303	65.3258	3.031	18.3751
0.307	68.3655	3.073	18.3402
0.311	71.387	3.114	18.306
0.316	74.3223	3.156	18.2736
0.32	78.345	3.197	18.2449
0.324	85.153	3.239	18.2136
0.328	92.4341	3.28	18.183
0.332	97.9334	3.322	18.1576
0.336	102.292	3.363	18.1292
0.34	102.36	3.405	18.1002
0.345	101.125	3.446	18.0727
0.349	99.8383	3.488	18.0451
0.353	98.7277	3.529	18.0187
0.357	97.6261	3.571	17.9888
0.361	96.4796	3.612	17.9612
0.365	95.3253	3.654	17.938
0.369	94.1603	3.695	17.9146
0.374	92.9862	3.737	17.8914
0.378	91.7015	3.778	17.8686
0.382	90.3737	3.82	17.8458
0.386	89.0398	3.862	17.8242
0.39	87.6734	3.903	17.8066
0.394	86.2762	3.945	17.7899
0.399	84.8401	3.986	17.7762
0.403	83.3957	4.028	17.7654
0.407	81.9627	4.069	17.7553
0.411	80.5137	4.111	17.7414
0.415	79.0551	4.152	17.7179
0.419	77.5933	4.194	17.6893
0.423	75.1362	4.235	17.6672
0.428	70.0487	4.277	17.6538
0.432	64.2452	4.318	17.6425
0.436	58.4652	4.36	17.6332
0.44	52.6887	4.401	17.6247
0.444	50.6444	4.443	17.6107
0.448	50.2477	4.484	17.5939
0.453	49.9115	4.526	17.5795
0.457	49.5492	4.567	17.5703
0.461	49.2114	4.609	17.5629
0.465	48.9081	4.65	17.5533
0.469	48.5962	4.692	17.545
0.473	48.2729	4.733	17.5364
0.477	47.9479	4.775	17.5267
0.482	47.7228	4.817	17.5149
0.486	47.5486	4.858	17.5036
0.49	47.3786	4.9	17.4923
0.494	47.2084	4.941	17.4834
0.498	47.0575	4.983	17.4776
0.502	46.9437	5.024	17.471
0.506	46.8004	5.066	17.4626
0.511	46.6345	5.107	17.4552
0.515	46.4686	5.149	17.452
0.519	46.3057	5.19	17.4476
0.523	46.1373	5.232	17.4404
0.527	45.9556	5.273	17.4339
0.531	45.769	5.315	17.4291
0.536	45.5575	5.356	17.4252
0.54	45.3171	5.398	17.4204
0.544	45.0426	5.439	17.4168
0.548	44.7521	5.481	17.4143
0.552	44.477	5.522	17.411
0.556	44.2766	5.564	17.4088
0.56	44.1074	5.605	17.405
0.565	43.9298	5.647	17.4014
0.569	43.7503	5.689	17.3994
0.573	43.5862	5.73	17.3971
0.577	43.4344	5.772	17.3945
0.581	43.2851	5.813	17.3919
0.585	43.1358	5.855	17.3881
0.589	42.9866	5.896	17.3829
0.594	42.8378	5.938	17.378
0.598	42.6923	5.979	17.3728
0.602	42.5592	6.021	17.3676
0.606	42.4326	6.062	17.3645
0.61	42.3428	6.104	17.3632
0.614	42.2799	6.145	17.3608
0.619	42.2174	6.187	17.3572
0.623	42.1534	6.228	17.3537
0.627	42.0944	6.27	17.3517
0.631	42.0475	6.311	17.3499
0.635	42.0176	6.353	17.3465
0.639	42.0393	6.394	17.3428
0.643	42.0924	6.436	17.3395
0.648	42.1678	6.477	17.3367
0.652	42.2621	6.519	17.3356
0.656	42.3661	6.56	17.3354
0.66	42.4778	6.602	17.3348
0.664	42.5934	6.644	17.3341
0.668	42.717	6.685	17.3326
0.673	42.8439	6.727	17.3294
0.677	42.9567	6.768	17.3263
0.681	43.0602	6.81	17.3253
0.685	43.1643	6.851	17.324
0.689	43.2685	6.893	17.3204
0.693	43.374	6.934	17.3166
0.697	43.4813	6.976	17.3131
0.702	43.5869	7.017	17.308
0.706	43.6809	7.059	17.3021
0.71	43.7702	7.1	17.2957
0.714	43.8773	7.142	17.2894
0.718	43.9974	7.183	17.2852
0.722	44.1193	7.225	17.2825
0.726	44.2433	7.266	17.2803
0.731	44.3645	7.308	17.2772
0.735	44.4823	7.349	17.2735
0.739	44.5899	7.391	17.271
0.743	44.651	7.432	17.2692
0.747	44.673	7.474	17.2656
0.751	44.6889	7.515	17.2601
0.756	44.6998	7.557	17.2559
0.76	44.704	7.599	17.256
0.764	44.6996	7.64	17.2559
0.768	44.6836	7.682	17.2534
0.772	44.6545	7.723	17.251
0.776	44.624	7.765	17.2465
0.78	44.6051	7.806	17.2392
0.785	44.5932	7.848	17.2334
0.789	44.5662	7.889	17.2316
0.793	44.5275	7.931	17.2327
0.797	44.4877	7.972	17.234
0.801	44.4458	8.014	17.236
0.805	44.3937	8.055	17.2368
0.81	44.3272	8.097	17.2342
0.814	44.2546	8.138	17.2304
0.818	44.1658	8.18	17.2263
0.822	44.0611	8.221	17.2239
0.826	43.9538	8.263	17.2241
0.83	43.8443	8.304	17.2233
0.834	43.7381	8.346	17.2197
0.839	43.6362	8.387	17.2142
0.843	43.5405	8.429	17.2083
0.847	43.4541	8.47	17.2063
0.851	43.3706	8.512	17.203
0.855	43.2927	8.554	17.2
0.859	43.2177	8.595	17.1993
0.863	43.1323	8.637	17.1987
0.868	43.0374	8.678	17.1974
0.872	42.9509	8.72	17.1955
0.876	42.8786	8.761	17.1947
0.88	42.8038	8.803	17.1944
0.884	42.7203	8.844	17.1929
0.888	42.6399	8.886	17.1911
0.893	42.5737	8.927	17.1892
0.897	42.5193	8.969	17.1871
0.901	42.4609	9.01	17.1866
0.905	42.3987	9.052	17.1865
0.909	42.3445	9.093	17.1859
0.913	42.3059	9.135	17.1842
0.917	42.2858	9.176	17.1802
0.922	42.2935	9.218	17.1768
0.926	42.3047	9.259	17.1758
0.93	42.3183	9.301	17.176
0.934	42.3355	9.342	17.175
0.938	42.3568	9.384	17.173
0.942	42.3821	9.425	17.1716
0.947	42.4026	9.467	17.17
0.951	42.4133	9.509	17.169
0.955	42.4265	9.55	17.1689
0.959	42.4517	9.592	17.1674
0.963	42.4833	9.633	17.1654
0.967	42.5247	9.675	17.163
0.971	42.5773	9.716	17.1612
0.976	42.6324	9.758	17.1622
0.98	42.6904	9.799	17.1626
0.984	42.7527	9.841	17.1625
0.988	42.8248	9.882	17.1643
0.992	42.9027	9.924	17.1651
0.996	42.9917	9.965	17.1653
1	43.0836	10.007	17.1664
1.005	43.1801	10.048	17.1687
1.009	43.2812	10.09	17.1716
1.013	43.3826	10.131	17.1728
1.017	43.4848	10.173	17.174
1.021	43.5753	10.214	17.1742
1.025	43.635	10.256	17.1732
1.03	43.704	10.297	17.1721
1.034	43.8074	10.339	17.1699
1.038	43.9137	10.38	17.1678
1.042	44.0162	10.422	17.166
1.046	44.1173	10.464	17.1626
1.05	44.2316	10.505	17.1604
1.054	44.3579	10.547	17.1584
1.059	44.4821	10.588	17.1559
1.063	44.5939	10.63	17.1534
1.067	44.7194	10.671	17.1508
1.071	44.9032	10.713	17.1486
1.075	45.0866	10.754	17.1459
1.079	45.2677	10.796	17.1428
1.084	45.4471	10.837	17.1406
1.088	45.6326	10.879	17.1381
1.092	45.825	10.92	17.1378
1.096	46.0139	10.962	17.137
1.1	46.1902	11.003	17.133
1.104	46.3678	11.045	17.1315
1.108	46.5639	11.086	17.1308
1.113	46.7617	11.128	17.1305
1.117	46.9586	11.169	17.1293
1.121	47.1542	11.211	17.1266
1.125	47.3481	11.252	17.1253
1.129	47.5399	11.294	17.1228
1.133	47.7226	11.335	17.1209
1.137	47.8676	11.377	17.1177
1.142	48.0124	11.419	17.113
1.146	48.177	11.46	17.1106
1.15	48.3505	11.502	17.1103
1.154	48.5106	11.543	17.1093
1.158	48.655	11.585	17.1075
1.162	48.8084	11.626	17.1053
1.167	48.9875	11.668	17.1038
1.171	49.1546	11.709	17.1018
1.175	49.257	11.751	17.0999
1.179	49.3577	11.792	17.1005
1.183	49.4482	11.834	17.1014
1.187	49.5317	11.875	17.1023
1.191	49.6088	11.917	17.1028
1.196	49.6781	11.958	17.1018
1.2	49.7391	12	17.1013
1.204	49.77	12.041	17.0985
1.208	49.7977	12.083	17.0949
1.212	49.8045	12.124	17.0925
1.216	49.8095	12.166	17.089
1.221	49.7987	12.207	17.0856
1.225	49.7817	12.249	17.0822
1.229	49.7667	12.29	17.0803
1.233	49.7541	12.332	17.0822
1.237	49.7398	12.374	17.0845
1.241	49.7183	12.415	17.0852
1.245	49.6947	12.457	17.0855
1.25	49.6508	12.498	17.0858
1.254	49.5949	12.54	17.0879
1.258	49.5423	12.581	17.0862
1.262	49.4924	12.623	17.084
1.266	49.4379	12.664	17.0827
1.27	49.3549	12.706	17.0826
1.274	49.2722	12.747	17.0819
1.279	49.1916	12.789	17.0811
1.283	49.1118	12.83	17.0814
1.287	49.0425	12.872	17.0825
1.291	48.9784	12.913	17.0812
1.295	48.8898	12.955	17.0802
1.299	48.7915	12.996	17.0778
1.304	48.6987	13.038	17.0727
1.308	48.6382	13.079	17.0674
1.312	48.5633	13.121	17.063
1.316	48.4416	13.162	17.0631
1.32	48.322	13.204	17.0649
1.324	48.2173	13.245	17.0663
1.328	48.1189	13.287	17.0669
1.333	47.9943	13.329	17.0672
1.337	47.8634	13.37	17.0674
1.341	47.7338	13.412	17.0667
1.345	47.6115	13.453	17.064
1.349	47.4776	13.495	17.0629
1.353	47.316	13.536	17.0622
1.358	47.1548	13.578	17.0612
1.362	46.9898	13.619	17.0611
1.366	46.8216	13.661	17.0604
1.37	46.6525	13.702	17.0607
1.374	46.4857	13.744	17.0598
1.378	46.3166	13.785	17.0587
1.382	46.1442	13.827	17.0586
1.387	45.9558	13.868	17.0571
1.391	45.7502	13.91	17.055
1.395	45.5446	13.951	17.0547
1.399	45.3633	13.993	17.0528
1.403	45.1932	14.034	17.0521
1.407	44.9911	14.076	17.0513
1.411	44.7879	14.117	17.0503
1.416	44.5968	14.159	17.0493
1.42	44.454	14.2	17.0469
1.424	44.2961	14.242	17.0459
1.428	44.1018	14.284	17.0467
1.432	43.9031	14.325	17.047
1.436	43.7296	14.367	17.0446
1.441	43.5639	14.408	17.0373
1.445	43.3927	14.45	17.032
1.449	43.2196	14.491	17.0305
1.453	43.0576	14.533	17.0307
1.457	42.9222	14.574	17.0305
1.461	42.7876	14.616	17.028
1.465	42.6519	14.657	17.0269
1.47	42.5161	14.699	17.0274
1.474	42.3811	14.74	17.0275
1.478	42.2469	14.782	17.0283
1.482	42.1034	14.823	17.027
1.486	41.9567	14.865	17.025
1.49	41.8243	14.906	17.0242
1.494	41.7087	14.948	17.0227
1.499	41.5657	14.989	17.0221
1.503	41.3894	15.031	17.0228
1.507	41.2099	15.072	17.0227
1.511	41.0598	15.114	17.0251
1.515	40.9113	15.155	17.0246
1.519	40.7435	15.197	17.0209
1.524	40.5733	15.239	17.0183
1.528	40.4184	15.28	17.0158
1.532	40.3021	15.322	17.0161
1.536	40.171	15.363	17.0134
1.54	40.0235	15.405	17.0084
1.544	39.8742	15.446	17.0037
1.548	39.7301	15.488	17.0001
1.553	39.5889	15.529	17.0004
1.557	39.4543	15.571	17.0026
1.561	39.3204	15.612	17.0024
1.565	39.1874	15.654	17.0026
1.569	39.0556	15.695	17.001
1.573	38.9159	15.737	17.0015
1.578	38.7691	15.778	17.0039
1.582	38.6214	15.82	17.0053
1.586	38.4852	15.861	17.0066
1.59	38.3517	15.903	17.0075
1.594	38.2278	15.944	17.009
1.598	38.106	15.986	17.0105
1.602	38.0111	16.027	17.0108
1.607	37.9491	16.069	17.0092
1.611	37.8705	16.111	17.0071
1.615	37.7715	16.152	17.007
1.619	37.6709	16.194	17.0085
1.623	37.5881	16.235	17.0102
1.627	37.5079	16.277	17.0122
1.631	37.413	16.318	17.0126
1.636	37.3145	16.36	17.0124
1.64	37.2344	16.401	17.012
1.644	37.1695	16.443	17.0108
1.648	37.0964	16.484	17.0099
1.652	37.0093	16.526	17.01
1.656	36.9182	16.567	17.0089
1.661	36.8215	16.609	17.0085
1.665	36.7231	16.65	17.0092
1.669	36.6238	16.692	17.0111
1.673	36.524	16.733	17.013
1.677	36.4314	16.775	17.0134
1.681	36.3461	16.816	17.0131
1.685	36.2629	16.858	17.0113
1.69	36.182	16.899	17.0051
1.694	36.1017	16.941	17.0001
1.698	36.012	16.982	16.9988
1.702	35.9188	17.024	16.9996
1.706	35.8116	17.066	17.0002
1.71	35.6936	17.107	17.0002
1.715	35.5935	17.149	17.0003
1.719	35.5146	17.19	16.9994
1.723	35.434	17.232	17.0001
1.727	35.3349	17.273	17.0004
1.731	35.2311	17.315	16.9999
1.735	35.1406	17.356	16.9998
1.739	35.0554	17.398	16.9995
1.744	34.9603	17.439	16.9988
1.748	34.86	17.481	16.9967
1.752	34.7679	17.522	16.9947
1.756	34.6897	17.564	16.995
1.76	34.6102	17.605	16.9962
1.764	34.5146	17.647	16.998
1.768	34.4127	17.688	17.0001
1.773	34.3116	17.73	17.001
1.777	34.2112	17.771	17.0013
1.781	34.1251	17.813	17.0006
1.785	34.0473	17.854	16.9988
1.789	33.9699	17.896	16.9972
1.793	33.8904	17.937	16.9956
1.798	33.809	17.979	16.9953
1.802	33.7273	18.021	16.996
1.806	33.6449	18.062	16.9953
1.81	33.5742	18.104	16.9945
1.814	33.5138	18.145	16.9948
1.818	33.4433	18.187	16.9955
1.822	33.3656	18.228	16.9965
1.827	33.2941	18.27	16.9968
1.831	33.2399	18.311	16.9976
1.835	33.1831	18.353	16.9972
1.839	33.1154	18.394	16.9952
1.843	33.0449	18.436	16.9937
1.847	32.983	18.477	16.9918
1.852	32.9241	18.519	16.9904
1.856	32.8547	18.56	16.9896
1.86	32.7789	18.602	16.9875
1.864	32.7079	18.643	16.9835
1.868	32.6521	18.685	16.9816
1.872	32.5983	18.726	16.9841
1.876	32.5364	18.768	16.988
1.881	32.4718	18.809	16.9915
1.885	32.3949	18.851	16.995
1.889	32.3094	18.892	16.9967
1.893	32.2291	18.934	16.9967
1.897	32.1524	18.976	16.9942
1.901	32.0765	19.017	16.9882
1.905	32.0025	19.059	16.9793
1.91	31.9278	19.1	16.9696
1.914	31.851	19.142	16.9652
1.918	31.7743	19.183	16.9672
1.922	31.7095	19.225	16.9694
1.926	31.6533	19.266	16.9692
1.93	31.5905	19.308	16.9704
1.935	31.5223	19.349	16.9745
1.939	31.4636	19.391	16.9812
1.943	31.4167	19.432	16.9909
1.947	31.3663	19.474	17.002
1.951	31.3034	19.515	17.0106
1.955	31.2385	19.557	17.0157
1.959	31.1857	19.598	17.0177
1.964	31.1401	19.64	17.0161
1.968	31.0847	19.681	17.0127
1.972	31.0208	19.723	17.0097
1.976	30.962	19.764	17.0075
1.98	30.9113	19.806	17.0065
1.984	30.8626	19.847	17.0044
1.989	30.8097	19.889	17.0012
1.993	30.7528	19.931	16.9998
1.997	30.6903	19.972	16.9992
2.001	30.6233	20.014	16.9989
2.005	30.5567	20.055	16.9994
2.009	30.4906	20.097	16.9993
2.013	30.4262	20.138	16.9976
2.018	30.3637	20.18	16.9943
2.022	30.3034	20.221	16.9913
2.026	30.2495	20.263	16.9888
2.03	30.2005	20.304	16.9833
2.034	30.1572	20.346	16.9764
2.038	30.1201	20.387	16.9727
2.042	30.0734	20.429	16.9718
2.047	30.0128	20.47	16.9721
2.051	29.9549	20.512	16.9729
2.055	29.9095	20.553	16.9748
2.059	29.8665	20.595	16.9764
2.063	29.8081	20.636	16.9755
2.067	29.7379	20.678	16.9736
2.072	29.6757	20.719	16.9735
2.076	29.6231	20.761	16.9754
2.08	29.5707	20.802	16.9768
2.084	29.5187	20.844	16.9776
2.088	29.4677	20.886	16.9786
2.092	29.4206	20.927	16.9792
2.096	29.3778	20.969	16.9782
2.101	29.339	21.01	16.9764
2.105	29.3044	21.052	16.9756
2.109	29.2694	21.093	16.9749
2.113	29.2339	21.135	16.9733
2.117	29.2018	21.176	16.9718
2.121	29.1764	21.218	16.9721
2.126	29.1518	21.259	16.9722
2.13	29.1209	21.301	16.9696
2.134	29.0834	21.342	16.9653
2.138	29.043	21.384	16.9624
2.142	28.9997	21.425	16.9633
2.146	28.9643	21.467	16.9678
2.15	28.9442	21.508	16.9726
2.155	28.919	21.55	16.976
2.159	28.8788	21.591	16.9765
2.163	28.8406	21.633	16.975
2.167	28.8166	21.674	16.9731
2.171	28.8053	21.716	16.9711
2.175	28.7877	21.757	16.97
2.179	28.7636	21.799	16.9696
2.184	28.7392	21.841	16.97
2.188	28.7144	21.882	16.9717
2.192	28.6884	21.924	16.9727
2.196	28.6593	21.965	16.9737
2.2	28.6281	22.007	16.9739
2.204	28.5931	22.048	16.9731
2.209	28.5537	22.09	16.9738
2.213	28.5159	22.131	16.9751
2.217	28.4803	22.173	16.9767
2.221	28.442	22.214	16.9766
2.225	28.3967	22.256	16.9753
2.229	28.3485	22.297	16.9747
2.233	28.2991	22.339	16.9738
2.238	28.2491	22.38	16.9722
2.242	28.2018	22.422	16.9702
2.246	28.1566	22.463	16.9696
2.25	28.106	22.505	16.9697
2.254	28.0491	22.546	16.9693
2.258	27.9987	22.588	16.9681
2.263	27.9649	22.629	16.9656
2.267	27.9336	22.671	16.9621
2.271	27.9042	22.712	16.9571
2.275	27.8762	22.754	16.9501
2.279	27.8543	22.796	16.9469
2.283	27.8374	22.837	16.9461
2.287	27.8106	22.879	16.9459
2.292	27.7739	22.92	16.9478
2.296	27.7382	22.962	16.9497
2.3	27.7058	23.003	16.9508
2.304	27.6748	23.045	16.952
2.308	27.6435	23.086	16.9528
2.312	27.6118	23.128	16.9536
2.316	27.5787	23.169	16.9529
2.321	27.5421	23.211	16.9498
2.325	27.5018	23.252	16.9466
2.329	27.4595	23.294	16.9441
2.333	27.4178	23.335	16.9417
2.337	27.3788	23.377	16.9422
2.341	27.3446	23.418	16.9429
2.346	27.3191	23.46	16.9442
2.35	27.2944	23.501	16.9449
2.354	27.2746	23.543	16.944
2.358	27.2584	23.584	16.9426
2.362	27.2277	23.626	16.9396
2.366	27.1936	23.667	16.9385
2.37	27.1589	23.709	16.9396
2.375	27.1214	23.751	16.9397
2.379	27.0794	23.792	16.9407
2.383	27.0325	23.834	16.9414
2.387	26.9875	23.875	16.9425
2.391	26.9522	23.917	16.943
2.395	26.9268	23.958	16.9417
2.4	26.8993	24	16.9411
2.404	26.8715	24.041	16.9425
2.408	26.8438	24.083	16.9436
2.412	26.8157	24.124	16.9427
2.416	26.7798	24.166	16.9415
2.42	26.7316	24.207	16.9405
2.424	26.6842	24.249	16.9377
2.429	26.6406	24.29	16.9341
2.433	26.6015	24.332	16.9337
2.437	26.5759	24.373	16.9323
2.441	26.5554	24.415	16.9316
2.445	26.5312	24.456	16.9332
2.449	26.4966	24.498	16.934
2.453	26.457	24.539	16.9336
2.458	26.4088	24.581	16.9325
2.462	26.3627	24.622	16.933
2.466	26.3322	24.664	16.933
2.47	26.303	24.706	16.9316
2.474	26.2562	24.747	16.9309
2.478	26.2056	24.789	16.93
2.483	26.1591	24.83	16.9281
2.487	26.1181	24.872	16.9275
2.491	26.0765	24.913	16.9282
2.495	26.0333	24.955	16.9285
2.499	25.9908	24.996	16.9284
2.503	25.9501	25.038	16.9282
2.507	25.9098	25.079	16.9235
2.512	25.8706	25.121	16.9215
2.516	25.8328	25.162	16.9242
2.52	25.8019	25.204	16.952
2.524	25.7847	25.245	17.0867
2.528	25.7679	25.287	17.0946
2.532	25.7543	25.328	17.0028
2.536	25.7397	25.37	16.9347
2.541	25.7108	25.411	16.9278
2.545	25.6762	25.453	16.9352
2.549	25.645	25.494	16.9407
2.553	25.6166	25.536	16.9421
2.557	25.5923	25.577	16.9503
2.561	25.5774	25.619	16.9591
2.566	25.5621	25.661	16.9608
2.57	25.5377	25.702	16.9568
2.574	25.514	25.744	16.9464
2.578	25.5093	25.785	16.9357
2.582	25.5088	25.827	16.9277
2.586	25.497	25.868	16.9199
2.59	25.4742	25.91	16.9149
2.595	25.4516	25.951	16.9115
2.599	25.4309	25.993	16.9099
2.603	25.4102	26.034	16.9104
2.607	25.3894	26.076	16.9112
2.611	25.3682	26.117	16.9137
2.615	25.346	26.159	16.9158
2.62	25.3229	26.2	16.9177
2.624	25.2974	26.242	16.9219
2.628	25.271	26.283	16.9255
2.632	25.2442	26.325	16.9269
2.636	25.2141	26.366	16.9263
2.64	25.1836	26.408	16.9245
2.644	25.1515	26.449	16.9249
2.649	25.1194	26.491	16.9257
2.653	25.0839	26.532	16.9265
2.657	25.0463	26.574	16.9296
2.661	25.0092	26.616	16.9308
2.665	24.9721	26.657	16.9336
2.669	24.9349	26.699	16.9367
2.673	24.9067	26.74	16.9381
2.678	24.8759	26.782	16.9417
2.682	24.8327	26.823	16.9447
2.686	24.7889	26.865	16.9464
2.69	24.7559	26.906	16.9476
2.694	24.7343	26.948	16.9475
2.698	24.7085	26.989	16.9456
2.703	24.6812	27.031	16.943
2.707	24.6539	27.072	16.9408
2.711	24.6273	27.114	16.94
2.715	24.599	27.155	16.9397
2.719	24.5673	27.197	16.9411
2.723	24.5352	27.238	16.9407
2.727	24.5053	27.28	16.9396
2.732	24.4765	27.321	16.9388
2.736	24.453	27.363	16.9373
2.74	24.4307	27.404	16.9383
2.744	24.4089	27.446	16.9402
2.748	24.3884	27.488	16.94
2.752	24.3712	27.529	16.9405
2.757	24.3617	27.571	16.9414
2.761	24.353	27.612	16.9425
2.765	24.344	27.654	16.9425
2.769	24.3347	27.695	16.9409
2.773	24.323	27.737	16.9399
2.777	24.3099	27.778	16.9381
2.781	24.2995	27.82	16.9371
2.786	24.3006	27.861	16.9385
2.79	24.2981	27.903	16.9404
2.794	24.2739	27.944	16.9422
2.798	24.2462	27.986	16.9447
2.802	24.2229	28.027	16.9467
2.806	24.2015	28.069	16.9478
2.81	24.175	28.11	16.9497
2.815	24.1442	28.152	16.9533
2.819	24.1145	28.193	16.9567
2.823	24.0877	28.235	16.9588
2.827	24.0614	28.276	16.9599
2.831	24.0375	28.318	16.958
2.835	24.0141	28.359	16.9563
2.84	23.9857	28.401	16.9563
2.844	23.9559	28.443	16.956
2.848	23.93	28.484	16.9579
2.852	23.9075	28.526	16.9614
2.856	23.8828	28.567	16.9659
2.86	23.8508	28.609	16.9696
2.864	23.8176	28.65	16.9702
2.869	23.7869	28.692	16.9697
2.873	23.7571	28.733	16.9696
2.877	23.7292	28.775	16.9689
2.881	23.7027	28.816	16.9698
2.885	23.6773	28.858	16.973
2.889	23.6526	28.899	16.9775
2.894	23.6328	28.941	16.982
2.898	23.6332	28.982	16.9856
2.902	23.6335	29.024	16.9892
2.906	23.6196	29.065	16.9901
2.91	23.6019	29.107	16.9873
2.914	23.5888	29.148	16.9805
2.918	23.5803	29.19	16.9702
2.923	23.5671	29.231	16.9649
2.927	23.5509	29.273	16.9651
2.931	23.5342	29.314	16.9661
2.935	23.5153	29.356	16.9678
2.939	23.4969	29.398	16.9703
2.943	23.4808	29.439	16.973
2.947	23.4652	29.481	16.9737
2.952	23.4461	29.522	16.9724
2.956	23.4234	29.564	16.9721
2.96	23.4028	29.605	16.9708
2.964	23.3835	29.647	16.9685
2.968	23.3639	29.688	16.9651
2.972	23.342	29.73	16.9626
2.977	23.3129	29.771	16.9621
2.981	23.2755	29.813	16.9631
2.985	23.2353	29.854	16.9656
2.989	23.194	29.896	16.9684
2.993	23.1529	29.937	16.9696
2.997	23.121	29.979	16.969
3.001	23.0929	30.02	16.9661
3.006	23.0698	30.062	16.964
3.01	23.0601	30.103	16.9657
3.014	23.0502	30.145	16.9681
3.018	23.0353	30.186	16.9697
3.022	23.0193	30.228	16.9714
3.026	23.0083	30.269	16.9726
3.031	23.0021	30.311	16.9732
3.035	22.9995	30.353	16.9729
3.039	22.9981	30.394	16.9726
3.043	22.9957	30.436	16.9739
3.047	22.9912	30.477	16.9759
3.051	22.9791	30.519	16.9789
3.055	22.959	30.56	16.9823
3.06	22.9366	30.602	16.9849
3.064	22.9113	30.643	16.9864
3.068	22.8846	30.685	16.9869
3.072	22.859	30.726	16.9869
3.076	22.8339	30.768	16.9876
3.08	22.8145	30.809	16.9878
3.084	22.8041	30.851	16.988
3.089	22.7969	30.892	16.988
3.093	22.7897	30.934	16.9876
3.097	22.7816	30.975	16.9881
3.101	22.7651	31.017	16.9876
3.105	22.7429	31.058	16.9862
3.109	22.7178	31.1	16.9859
3.114	22.6914	31.141	16.9851
3.118	22.6699	31.183	16.9837
3.122	22.6537	31.224	16.9829
3.126	22.6327	31.266	16.9832
3.13	22.6068	31.308	16.9838
3.134	22.5795	31.349	16.9841
3.138	22.5495	31.391	16.9854
3.143	22.519	31.432	16.9872
3.147	22.4907	31.474	16.9885
3.151	22.4635	31.515	16.9897
3.155	22.4422	31.557	16.99
3.159	22.4292	31.598	16.9885
3.163	22.4151	31.64	16.9874
3.168	22.397	31.681	16.9872
3.172	22.378	31.723	16.9876
3.176	22.3581	31.764	16.9883
3.18	22.3382	31.806	16.9878
3.184	22.32	31.847	16.9882
3.188	22.3029	31.889	16.9892
3.192	22.2859	31.93	16.9912
3.197	22.2688	31.972	16.9936
3.201	22.2497	32.013	16.9944
3.205	22.2278	32.055	16.993
3.209	22.2061	32.096	16.9889
3.213	22.1868	32.138	16.985
3.217	22.1682	32.179	16.9829
3.221	22.1447	32.221	16.9799
3.226	22.1176	32.263	16.9774
3.23	22.0958	32.304	16.9767
3.234	22.0795	32.346	16.977
3.238	22.0658	32.387	16.9789
3.242	22.0546	32.429	16.9801
3.246	22.0433	32.47	16.9811
3.251	22.0298	32.512	16.9817
3.255	22.0131	32.553	16.9817
3.259	21.991	32.595	16.9826
3.263	21.9649	32.636	16.9833
3.267	21.9422	32.678	16.983
3.271	21.9239	32.719	16.9827
3.275	21.908	32.761	16.9825
3.28	21.8939	32.802	16.9846
3.284	21.8795	32.844	16.9881
3.288	21.8635	32.885	16.9905
3.292	21.8481	32.927	16.9922
3.296	21.8375	32.968	16.9927
3.3	21.8301	33.01	16.9919
3.305	21.8245	33.051	16.9898
3.309	21.8215	33.093	16.9862
3.313	21.8207	33.134	16.9829
3.317	21.8214	33.176	16.9811
3.321	21.8229	33.218	16.9808
3.325	21.8288	33.259	16.9817
3.329	21.8358	33.301	16.9833
3.334	21.8364	33.342	16.9854
3.338	21.8341	33.384	16.9862
3.342	21.8303	33.425	16.9857
3.346	21.8231	33.467	16.985
3.35	21.812	33.508	16.9837
3.354	21.7979	33.55	16.9839
3.358	21.7852	33.591	16.9847
3.363	21.7775	33.633	16.9854
3.367	21.7733	33.674	16.987
3.371	21.7671	33.716	16.9875
3.375	21.7604	33.757	16.9861
3.379	21.7525	33.799	16.9841
3.383	21.7444	33.84	16.982
3.388	21.7414	33.882	16.9808
3.392	21.7424	33.923	16.9789
3.396	21.7419	33.965	16.9785
3.4	21.7367	34.006	16.9771
3.404	21.7261	34.048	16.9708
3.408	21.7127	34.089	16.9674
3.412	21.6992	34.131	16.9684
3.417	21.6847	34.173	16.9698
3.421	21.6676	34.214	16.9702
3.425	21.6484	34.256	16.97
3.429	21.6282	34.297	16.9691
3.433	21.6107	34.339	16.9682
3.437	21.5995	34.38	16.9672
3.441	21.5893	34.422	16.9676
3.446	21.5754	34.463	16.9674
3.45	21.5619	34.505	16.9666
3.454	21.5511	34.546	16.9664
3.458	21.5421	34.588	16.9673
3.462	21.5288	34.629	16.969
3.466	21.5139	34.671	16.9704
3.471	21.4998	34.712	16.9723
3.475	21.4877	34.754	16.974
3.479	21.475	34.795	16.9756
3.483	21.4609	34.837	16.9767
3.487	21.4455	34.878	16.98
3.491	21.4249	34.92	16.9836
3.495	21.3992	34.961	16.9872
3.5	21.3721	35.003	16.9881
3.504	21.3446	35.044	16.9875
3.508	21.3185	35.086	16.9879
3.512	21.2969	35.128	16.9882
3.516	21.2793	35.169	16.9891
3.52	21.2651	35.211	16.989
3.525	21.2517	35.252	16.9879
3.529	21.2403	35.294	16.9873
3.533	21.226	35.335	16.9873
3.537	21.2	35.377	16.9862
3.541	21.173	35.418	16.9857
3.545	21.148	35.46	16.986
3.549	21.1268	35.501	16.9871
3.554	21.1045	35.543	16.9864
3.558	21.0809	35.584	16.9836
3.562	21.0587	35.626	16.9801
3.566	21.0412	35.667	16.9772
3.57	21.0281	35.709	16.9755
3.574	21.0232	35.75	16.9745
3.578	21.0186	35.792	16.9728
3.583	21.015	35.833	16.9734
3.587	21.0127	35.875	16.976
3.591	21.0097	35.916	16.9781
3.595	21.0064	35.958	16.9795
3.599	21.0034	35.999	16.9812
3.603	21.0014	36.041	16.9841
3.608	20.9958	36.083	16.986
3.612	20.9824	36.124	16.9875
3.616	20.9683	36.166	16.988
3.62	20.9504	36.207	16.9877
3.624	20.9307	36.249	16.9872
3.628	20.9203	36.29	16.9852
3.632	20.9121	36.332	16.9832
3.637	20.9067	36.373	16.9825
3.641	20.9135	36.415	16.9824
3.645	20.9187	36.456	16.982
3.649	20.9205	36.498	16.9801
3.653	20.9225	36.539	16.9776
3.657	20.9257	36.581	16.9787
3.662	20.9274	36.622	16.9762
3.666	20.9153	36.664	16.9725
3.67	20.9032	36.705	16.9706
3.674	20.8894	36.747	16.968
3.678	20.868	36.788	16.9674
3.682	20.8558	36.83	16.9669
3.686	20.8494	36.871	16.9638
3.691	20.843	36.913	16.9621
3.695	20.8373	36.954	16.9624
3.699	20.8292	36.996	16.9629
3.703	20.8027	37.038	16.9656
3.707	20.7765	37.079	16.9672
3.711	20.7537	37.121	16.9684
3.715	20.7404	37.162	16.9701
3.72	20.7342	37.204	16.9705
3.724	20.7324	37.245	16.9699
3.728	20.7292	37.287	16.97
3.732	20.7162	37.328	16.9711
3.736	20.702	37.37	16.9711
3.74	20.7019	37.411	16.9681
3.745	20.7021	37.453	16.9671
3.749	20.7051	37.494	16.9683
3.753	20.7117	37.536	16.9713
3.757	20.7161	37.577	16.9729
3.761	20.7177	37.619	16.9728
3.765	20.7207	37.66	16.9766
3.769	20.7389	37.702	16.9768
3.774	20.7567	37.743	16.9777
3.778	20.7713	37.785	16.9802
3.782	20.7851	37.826	16.9805
3.786	20.7892	37.868	16.9781
3.79	20.7871	37.91	16.9762
3.794	20.7833	37.951	16.9745
3.799	20.7743	37.993	16.9745
3.803	20.7664	38.034	16.973
3.807	20.7786	38.076	16.9713
3.811	20.7911	38.117	16.9715
3.815	20.8068	38.159	16.9722
3.819	20.823	38.2	16.9745
3.823	20.8319	38.242	16.9728
3.828	20.8361	38.283	16.9673
3.832	20.8383	38.325	16.9633
3.836	20.8367	38.366	16.9604
3.84	20.8347	38.408	16.9611
3.844	20.8175	38.449	16.9618
3.848	20.8002	38.491	16.9621
3.852	20.7848	38.532	16.9621
3.857	20.7696	38.574	16.9624
3.861	20.7565	38.615	16.9611
3.865	20.7464	38.657	16.9578
3.869	20.7382	38.698	16.9549
3.873	20.7318	38.74	16.9521
3.877	20.7254	38.781	16.9429
3.882	20.7226	38.823	16.9353
3.886	20.719	38.865	16.932
3.89	20.7087	38.906	16.9324
3.894	20.6983	38.948	16.9342
3.898	20.6892	38.989	16.9336
3.902	20.6856	39.031	16.9315
3.906	20.6822	39.072	16.9316
3.911	20.6788	39.114	16.9335
3.915	20.6754	39.155	16.9347
3.919	20.6688	39.197	16.9305
3.923	20.6611	39.238	16.9287
3.927	20.6531	39.28	16.9297
3.931	20.645	39.321	16.9312
3.936	20.6386	39.363	16.9313
3.94	20.6362	39.404	16.9278
3.944	20.6374	39.446	16.9238
3.948	20.641	39.487	16.9236
3.952	20.6448	39.529	16.9234
3.956	20.6468	39.57	16.9225
3.96	20.6481	39.612	16.9233
3.965	20.6473	39.653	16.9172
3.969	20.6464	39.695	16.9083
3.973	20.6438	39.736	16.8986
3.977	20.6394	39.778	16.8928
3.981	20.6342	39.82	16.8875
3.985	20.6286	39.861	16.8842
3.989	20.6237	39.903	16.8889
3.994	20.6251	39.944	16.897
3.998	20.6261	39.986	16.9041
4.002	20.6191	40.027	16.9084
4.006	20.611	40.069	16.9053
4.01	20.6029	40.11	16.9026
4.014	20.5947	40.152	16.9025
4.019	20.5858	40.193	16.9056
4.023	20.5765	40.235	16.9104
4.027	20.5673	40.276	16.9143
4.031	20.5584	40.318	16.9179
4.035	20.5504	40.359	16.9223
4.039	20.5445	40.401	16.9248
4.043	20.5389	40.442	16.927
4.048	20.5301	40.484	16.9284
4.052	20.519	40.525	16.9309
4.056	20.4991	40.567	16.9352
4.06	20.4741	40.608	16.9387
4.064	20.4489	40.65	16.9422
4.068	20.4256	40.691	16.9445
4.073	20.4029	40.733	16.9441
4.077	20.3818	40.775	16.9436
4.081	20.3608	40.816	16.9429
4.085	20.3405	40.858	16.9426
4.089	20.3205	40.899	16.9425
4.093	20.3002	40.941	16.9413
4.097	20.2797	40.982	16.9418
4.102	20.26	41.024	16.9436
4.106	20.248	41.065	16.946
4.11	20.2377	41.107	16.9489
4.114	20.2287	41.148	16.949
4.118	20.22	41.19	16.9479
4.122	20.2119	41.231	16.9455
4.126	20.2043	41.273	16.9422
4.131	20.196	41.314	16.9413
4.135	20.1871	41.356	16.9416
4.139	20.1774	41.397	16.9431
4.143	20.1657	41.439	16.9448
4.147	20.1526	41.48	16.9465
4.151	20.1356	41.522	16.9479
4.156	20.1176	41.563	16.9499
4.16	20.1074	41.605	16.9509
4.164	20.1024	41.646	16.9497
4.168	20.092	41.688	16.9485
4.172	20.0767	41.73	16.9492
4.176	20.0603	41.771	16.9501
4.18	20.0424	41.813	16.9503
4.185	20.0267	41.854	16.9514
4.189	20.0176	41.896	16.9526
4.193	20.0105	41.937	16.9544
4.197	20.0037	41.979	16.9558
4.201	19.9973	42.02	16.9547
4.205	19.9882	42.062	16.9532
4.21	19.9779	42.103	16.9528
4.214	19.9672	42.145	16.9539
4.218	19.9554	42.186	16.9553
4.222	19.942	42.228	16.955
4.226	19.9254	42.269	16.954
4.23	19.9077	42.311	16.9529
4.234	19.8906	42.352	16.9516
4.239	19.8741	42.394	16.9509
4.243	19.8535	42.435	16.9501
4.247	19.83	42.477	16.9498
4.251	19.8069	42.518	16.9505
4.255	19.7874	42.56	16.9505
4.259	19.769	42.601	16.9514
4.263	19.7488	42.643	16.9534
4.268	19.7276	42.685	16.9535
4.272	19.712	42.726	16.9518
4.276	19.7017	42.768	16.9504
4.28	19.6938	42.809	16.9509
4.284	19.6871	42.851	16.951
4.288	19.6785	42.892	16.9513
4.293	19.6636	42.934	16.9525
4.297	19.6473	42.975	16.9521
4.301	19.6346	43.017	16.9515
4.305	19.6234	43.058	16.95
4.309	19.6146	43.1	16.9482
4.313	19.6073	43.141	16.9489
4.317	19.5982	43.183	16.9501
4.322	19.5875	43.224	16.95
4.326	19.5775	43.266	16.9498
4.33	19.5706	43.307	16.9502
4.334	19.5649	43.349	16.9514
4.338	19.5589	43.39	16.9518
4.342	19.5527	43.432	16.9522
4.347	19.5504	43.473	16.9518
4.351	19.5513	43.515	16.9502
4.355	19.5492	43.556	16.9492
4.359	19.545	43.598	16.9491
4.363	19.5409	43.64	16.9474
4.367	19.5388	43.681	16.9451
4.371	19.5358	43.723	16.9445
4.376	19.5295	43.764	16.9452
4.38	19.5219	43.806	16.947
4.384	19.5132	43.847	16.9487
4.388	19.5035	43.889	16.9497
4.392	19.4966	43.93	16.9497
4.396	19.492	43.972	16.9487
4.4	19.4863	44.013	16.9469
4.405	19.4772	44.055	16.9443
4.409	19.4663	44.096	16.9429
4.413	19.4553	44.138	16.9426
4.417	19.4443	44.179	16.9431
4.421	19.4351	44.221	16.9442
4.425	19.4277	44.262	16.9438
4.43	19.4202	44.304	16.9445
4.434	19.4123	44.345	16.946
4.438	19.4046	44.387	16.9438
4.442	19.3972	44.428	16.942
4.446	19.3881	44.47	16.9424
4.45	19.3767	44.511	16.9426
4.454	19.3645	44.553	16.9437
4.459	19.3554	44.595	16.9445
4.463	19.3482	44.636	16.9435
4.467	19.3382	44.678	16.9403
4.471	19.3266	44.719	16.9366
4.475	19.3166	44.761	16.9337
4.479	19.31	44.802	16.931
4.483	19.3024	44.844	16.9313
4.488	19.2915	44.885	16.9373
4.492	19.2797	44.927	16.9458
4.496	19.2651	44.968	16.9535
4.5	19.2489	45.01	16.9593
4.504	19.2377	45.051	16.9651
4.508	19.2308	45.093	16.9704
4.513	19.2239	45.134	16.9727
4.517	19.217	45.176	16.974
4.521	19.2106	45.217	16.9758
4.525	19.205	45.259	16.9759
4.529	19.1996	45.3	16.9736
4.533	19.1947	45.342	16.9706
4.537	19.1896	45.383	16.9689
4.542	19.1819	45.425	16.9682
4.546	19.1718	45.466	16.9674
4.55	19.1634	45.508	16.9677
4.554	19.1574	45.55	16.9676
4.558	19.1519	45.591	16.9656
4.562	19.1458	45.633	16.9627
4.567	19.1403	45.674	16.9595
4.571	19.1373	45.716	16.9562
4.575	19.136	45.757	16.9528
4.579	19.1334	45.799	16.9505
4.583	19.1298	45.84	16.9496
4.587	19.1283	45.882	16.9462
4.591	19.1303	45.923	16.9434
4.596	19.1326	45.965	16.9431
4.6	19.1341	46.006	16.9439
4.604	19.1346	46.048	16.9441
4.608	19.1306	46.089	16.9453
4.612	19.1216	46.131	16.947
4.616	19.1142	46.172	16.9488
4.62	19.1089	46.214	16.9489
4.625	19.1032	46.255	16.9445
4.629	19.0967	46.297	16.9354
4.633	19.0889	46.338	16.9256
4.637	19.0787	46.38	16.9169
4.641	19.0675	46.421	16.9089
4.645	19.0585	46.463	16.9034
4.65	19.0522	46.505	16.8993
4.654	19.0451	46.546	16.896
4.658	19.0367	46.588	16.8933
4.662	19.0283	46.629	16.8905
4.666	19.0205	46.671	16.8903
4.67	19.0114	46.712	16.8917
4.674	18.998	46.754	16.8921
4.679	18.9822	46.795	16.89
4.683	18.9675	46.837	16.8887
4.687	18.954	46.878	16.8858
4.691	18.9408	46.92	16.8809
4.695	18.9278	46.961	16.8768
4.699	18.9151	47.003	16.8745
4.704	18.9031	47.044	16.8751
4.708	18.8917	47.086	16.8779
4.712	18.8814	47.127	16.8811
4.716	18.8717	47.169	16.884
4.72	18.8608	47.21	16.8859
4.724	18.8477	47.252	16.8887
4.728	18.8361	47.293	16.8898
4.733	18.827	47.335	16.8891
4.737	18.8187	47.376	16.8881
4.741	18.8127	47.418	16.8889
4.745	18.8078	47.46	16.8918
4.749	18.8011	47.501	16.8954
4.753	18.7939	47.543	16.8989
4.757	18.7872	47.584	16.9031
4.762	18.7815	47.626	16.9077
4.766	18.7734	47.667	16.9129
4.77	18.7629	47.709	16.9187
4.774	18.7535	47.75	16.9228
4.778	18.7484	47.792	16.927
4.782	18.746	47.833	16.9296
4.787	18.7426	47.875	16.9291
4.791	18.7392	47.916	16.9275
4.795	18.7357	47.958	16.9281
4.799	18.7308	47.999	16.9296
4.803	18.7216	48.041	16.9311
4.807	18.7088	48.082	16.9324
4.811	18.6957	48.124	16.9338
4.816	18.6817	48.165	16.9352
4.82	18.6702	48.207	16.9367
4.824	18.6659	48.248	16.9371
4.828	18.6614	48.29	16.9358
4.832	18.6555	48.332	16.9322
4.836	18.648	48.373	16.9281
4.841	18.6446	48.415	16.9265
4.845	18.6427	48.456	16.9276
4.849	18.6414	48.498	16.9283
4.853	18.6418	48.539	16.9284
4.857	18.6406	48.581	16.9276
4.861	18.6353	48.622	16.9278
4.865	18.6305	48.664	16.9259
4.87	18.6281	48.705	16.9245
4.874	18.6278	48.747	16.9244
4.878	18.6242	48.788	16.925
4.882	18.6187	48.83	16.927
4.886	18.6135	48.871	16.9292
4.89	18.6094	48.913	16.9297
4.894	18.6053	48.954	16.9296
4.899	18.601	48.996	16.9292
4.903	18.5975	49.037	16.9283
4.907	18.5985	49.079	16.9275
4.911	18.6028	49.12	16.926
4.915	18.6046	49.162	16.9243
4.919	18.6052	49.203	16.9208
4.924	18.6035	49.245	16.9181
4.928	18.5938	49.287	16.9174
4.932	18.5842	49.328	16.9166
4.936	18.5752	49.37	16.9172
4.94	18.5654	49.411	16.9186
4.944	18.5514	49.453	16.9214
4.948	18.5369	49.494	16.9241
4.953	18.5304	49.536	16.9251
4.957	18.525	49.577	16.9264
4.961	18.5214	49.619	16.927
4.965	18.5218	49.66	16.9251
4.969	18.5187	49.702	16.9204
4.973	18.5113	49.743	16.9059
4.978	18.5042	49.785	16.8908
4.982	18.5005	49.826	16.8836
4.986	18.499	49.868	16.8847
4.99	18.498	49.909	16.8901
4.994	18.4971	49.951	16.895
4.998	18.4962	49.992	16.8997
5.002	18.495	50.034	16.905
5.007	18.488	50.075	16.9082
5.011	18.4757	50.117	16.9084
5.015	18.4638	50.158	16.9096
5.019	18.4544	50.2	16.912
5.023	18.4461	50.242	16.9173
5.027	18.437	50.283	16.9226
5.031	18.4279	50.325	16.9253
5.036	18.4185	50.366	16.9255
5.04	18.4089	50.408	16.9236
5.044	18.4023	50.449	16.9219
5.048	18.3985	50.491	16.9199
5.052	18.3942	50.532	16.9173
5.056	18.3812	50.574	16.9174
5.061	18.3672	50.615	16.9172
5.065	18.353	50.657	16.9202
5.069	18.3391	50.698	16.9227
5.073	18.3284	50.74	16.924
5.077	18.3224	50.781	16.926
5.081	18.3152	50.823	16.9278
5.085	18.307	50.864	16.9289
5.09	18.2987	50.906	16.9306
5.094	18.2898	50.947	16.9309
5.098	18.2816	50.989	16.9325
5.102	18.3136	51.03	16.935
5.106	18.3503	51.072	16.9347
5.11	18.3928	51.113	16.9348
5.115	18.4409	51.155	16.9336
5.119	18.4592	51.197	16.9335
5.123	18.4481	51.238	16.9351
5.127	18.4368	51.28	16.9345
5.131	18.4263	51.321	16.9331
5.135	18.4173	51.363	16.9327
5.139	18.4222	51.404	16.9315
5.144	18.4274	51.446	16.9294
5.148	18.4297	51.487	16.9264
5.152	18.429	51.529	16.9258
5.156	18.4291	51.57	16.9269
5.16	18.4299	51.612	16.927
5.164	18.4307	51.653	16.9279
5.168	18.4317	51.695	16.9282
5.173	18.4314	51.736	16.9285
5.177	18.4255	51.778	16.9311
5.181	18.4192	51.819	16.9314
5.185	18.414	51.861	16.9297
5.189	18.41	51.902	16.928
5.193	18.4056	51.944	16.9273
5.198	18.4009	51.985	16.9269
5.202	18.3963	52.027	16.9241
5.206	18.3536	52.068	16.9244
5.21	18.3028	52.11	16.928
5.214	18.25	52.152	16.931
5.218	18.1969	52.193	16.9336
5.222	18.1713	52.235	16.9345
5.227	18.1754	52.276	16.9353
5.231	18.173	52.318	16.9366
5.235	18.1677	52.359	16.936
5.239	18.1607	52.401	16.9333
5.243	18.1408	52.442	16.9293
5.247	18.1217	52.484	16.9264
5.252	18.1117	52.525	16.9271
5.256	18.1028	52.567	16.9291
5.26	18.093	52.608	16.9317
5.264	18.0825	52.65	16.9333
5.268	18.0745	52.691	16.9339
5.272	18.0681	52.733	16.9361
5.276	18.063	52.774	16.9362
5.281	18.0633	52.816	16.936
5.285	18.0624	52.857	16.936
5.289	18.0539	52.899	16.9348
5.293	18.0442	52.94	16.9342
5.297	18.0349	52.982	16.9337
5.301	18.0259	53.023	16.9333
5.305	18.0149	53.065	16.9344
5.31	18.0024	53.107	16.935
5.314	17.9904	53.148	16.9354
5.318	17.9802	53.19	16.9358
5.322	17.9696	53.231	16.9333
5.326	17.9562	53.273	16.9293
5.33	17.9422	53.314	16.9262
5.335	17.9364	53.356	16.924
5.339	17.9342	53.397	16.9226
5.343	17.931	53.439	16.9215
5.347	17.927	53.48	16.9216
5.351	17.921	53.522	16.9243
5.355	17.9065	53.563	16.9261
5.359	17.8911	53.605	16.9285
5.364	17.8774	53.646	16.9305
5.368	17.864	53.688	16.9294
5.372	17.8483	53.729	16.9279
5.376	17.831	53.771	16.9258
5.38	17.8229	53.812	16.9266
5.384	17.8172	53.854	16.9287
5.388	17.8132	53.895	16.9288
5.393	17.8163	53.937	16.9287
5.397	17.8188	53.978	16.9282
5.401	17.8166	54.02	16.9298
5.405	17.8134	54.062	16.9316
5.409	17.8118	54.103	16.9325
5.413	17.8119	54.145	16.9345
5.418	17.8102	54.186	16.9353
5.422	17.8078	54.228	16.9335
5.426	17.806	54.269	16.934
5.43	17.8068	54.311	16.9337
5.434	17.8036	54.352	16.9313
5.438	17.7955	54.394	16.928
5.442	17.7864	54.435	16.927
5.447	17.7785	54.477	16.9298
5.451	17.7715	54.518	16.933
5.455	17.765	54.56	16.9341
5.459	17.7588	54.601	16.9335
5.463	17.7517	54.643	16.9312
5.467	17.7428	54.684	16.9314
5.472	17.7358	54.726	16.9316
5.476	17.7321	54.767	16.9346
5.48	17.7293	54.809	16.9393
5.484	17.718	54.85	16.9424
5.488	17.7034	54.892	16.9461
5.492	17.6942	54.933	16.9509
5.496	17.6874	54.975	16.9534
5.501	17.6828	55.017	16.9533
5.505	17.6826	55.058	16.9518
5.509	17.6781	55.1	16.9498
5.513	17.6672	55.141	16.9491
5.517	17.6545	55.183	16.9484
5.521	17.6437	55.224	16.9477
5.525	17.6337	55.266	16.9478
5.53	17.6229	55.307	16.9449
5.534	17.6117	55.349	16.9415
5.538	17.6049	55.39	16.9388
5.542	17.6031	55.432	16.9346
5.546	17.603	55.473	16.932
5.55	17.6032	55.515	16.9325
5.555	17.6033	55.556	16.9351
5.559	17.603	55.598	16.9369
5.563	17.6032	55.639	16.9389
5.567	17.6053	55.681	16.9413
5.571	17.6084	55.722	16.943
5.575	17.6094	55.764	16.9437
5.579	17.6071	55.805	16.9449
5.584	17.605	55.847	16.947
5.588	17.6039	55.888	16.9496
5.592	17.6028	55.93	16.9527
5.596	17.5969	55.972	16.9544
5.6	17.5879	56.013	16.9558
5.604	17.5786	56.055	16.9573
5.609	17.5689	56.096	16.9574
5.613	17.5643	56.138	16.9565
5.617	17.5664	56.179	16.9547
5.621	17.5714	56.221	16.954
5.625	17.5769	56.262	16.9555
5.629	17.5826	56.304	16.9584
5.633	17.589	56.345	16.9628
5.638	17.5941	56.387	16.9661
5.642	17.5952	56.428	16.9661
5.646	17.5943	56.47	16.9661
5.65	17.5932	56.511	16.9652
5.654	17.5919	56.553	16.9594
5.658	17.5814	56.594	16.9496
5.662	17.5642	56.636	16.9403
5.667	17.5462	56.677	16.9355
5.671	17.5264	56.719	16.9383
5.675	17.5093	56.76	16.9506
5.679	17.4992	56.802	16.9644
5.683	17.4922	56.843	16.9754
5.687	17.4841	56.885	16.9873
5.692	17.4749	56.927	16.9993
5.696	17.4673	56.968	17.0092
5.7	17.461	57.01	17.0169
5.704	17.4549	57.051	17.0206
5.708	17.4492	57.093	17.02
5.712	17.4429	57.134	17.016
5.716	17.4342	57.176	17.0126
5.721	17.424	57.217	17.0139
5.725	17.4134	57.259	17.0185
5.729	17.4022	57.3	17.0233
5.733	17.3889	57.342	17.0263
5.737	17.3734	57.383	17.0274
5.741	17.3593	57.425	17.0288
5.746	17.3491	57.466	17.0309
5.75	17.3397	57.508	17.0327
5.754	17.3264	57.549	17.034
5.758	17.3107	57.591	17.0339
5.762	17.3029	57.632	17.0331
5.766	17.3033	57.674	17.0341
5.77	17.3033	57.715	17.0354
5.775	17.303	57.757	17.0337
5.779	17.2995	57.798	17.0316
5.783	17.2888	57.84	17.03
5.787	17.2756	57.882	17.0286
5.791	17.2653	57.923	17.0299
5.795	17.257	57.965	17.0323
5.799	17.2472	58.006	17.0355
5.804	17.2358	58.048	17.039
5.808	17.2282	58.089	17.0416
5.812	17.2257	58.131	17.0443
5.816	17.2246	58.172	17.0475
5.82	17.2257	58.214	17.0516
5.824	17.2275	58.255	17.0561
5.829	17.2238	58.297	17.0603
5.833	17.2147	58.338	17.064
5.837	17.2072	58.38	17.0672
5.841	17.2021	58.421	17.0695
5.845	17.1978	58.463	17.0723
5.849	17.1942	58.504	17.0764
5.853	17.1921	58.546	17.0793
5.858	17.1938	58.587	17.0812
5.862	17.1972	58.629	17.0832
5.866	17.1973	58.67	17.0851
5.87	17.1944	58.712	17.0862
5.874	17.1918	58.753	17.0865
5.878	17.1895	58.795	17.0883
5.883	17.188	58.837	17.0912
5.887	17.1877	58.878	17.0926
5.891	17.1868	58.92	17.094
5.895	17.183	58.961	17.0976
5.899	17.1784	59.003	17.102
5.903	17.178	59.044	17.1046
5.907	17.1812	59.086	17.1048
5.912	17.1812	59.127	17.1055
5.916	17.1755	59.169	17.1071
5.92	17.1685	59.21	17.1098
5.924	17.1602	59.252	17.1136
5.928	17.1529	59.293	17.1169
5.932	17.1502	59.335	17.1195
5.936	17.1536	59.376	17.1224
5.941	17.1563	59.418	17.1252
5.945	17.1586	59.459	17.1274
5.949	17.1605	59.501	17.1301
5.953	17.1615	59.542	17.1334
5.957	17.1603	59.584	17.1386
5.961	17.1549	59.625	17.1441
5.966	17.1502	59.667	17.1479
5.97	17.1486	59.709	17.1513
5.974	17.1499	59.75	17.1547
5.978	17.1492	59.792	17.158
5.982	17.1469	59.833	17.1615
5.986	17.1439	59.875	17.1642
5.99	17.1396	59.916	17.1653
5.995	17.1354	59.958	17.1663
5.999	17.1324	59.999	17.1673
6.003	17.1284	60.041	17.1687
6.007	17.1201	60.082	17.1697
6.011	17.1084	60.124	17.1723
6.015	17.0982	60.165	17.1774
6.02	17.0891	60.207	17.1814
6.024	17.0805	60.248	17.1826
6.028	17.0735	60.29	17.185
6.032	17.0675	60.331	17.1869
6.036	17.0638	60.373	17.1888
6.04	17.0602	60.414	17.1923
6.044	17.0573	60.456	17.1959
6.049	17.0531	60.497	17.1989
6.053	17.0431	60.539	17.2013
6.057	17.0309	60.58	17.2046
6.061	17.0201	60.622	17.2093
6.065	17.0139	60.664	17.2146
6.069	17.0068	60.705	17.2183
6.073	16.9985	60.747	17.2206
6.078	16.9905	60.788	17.2211
6.082	16.9845	60.83	17.2213
6.086	16.9807	60.871	17.2234
6.09	16.9779	60.913	17.2261
6.094	16.9752	60.954	17.2287
6.098	16.9721	60.996	17.2314
6.103	16.9676	61.037	17.2345
6.107	16.9626	61.079	17.2397
6.111	16.9569	61.12	17.2442
6.115	16.9508	61.162	17.2491
6.119	16.9433	61.203	17.254
6.123	16.9356	61.245	17.2573
6.127	16.9325	61.286	17.2589
6.132	16.9297	61.328	17.2611
6.136	16.9261	61.369	17.262
6.14	16.9198	61.411	17.2639
6.144	16.911	61.452	17.2648
6.148	16.8969	61.494	17.2655
6.152	16.8841	61.535	17.2667
6.157	16.8774	61.577	17.2671
6.161	16.8731	61.619	17.2667
6.165	16.8682	61.66	17.2665
6.169	16.8632	61.702	17.269
6.173	16.8591	61.743	17.2723
6.177	16.8561	61.785	17.2765
6.181	16.8503	61.826	17.2791
6.186	16.8402	61.868	17.2815
6.19	16.8299	61.909	17.284
6.194	16.8187	61.951	17.2848
6.198	16.8075	61.992	17.288
6.202	16.799	62.034	17.2917
6.206	16.7908	62.075	17.2956
6.21	16.7832	62.117	17.3004
6.215	16.7765	62.158	17.3026
6.219	16.7723	62.2	17.3029
6.223	16.7712	62.241	17.3063
6.227	16.7695	62.283	17.3111
6.231	16.7628	62.324	17.3149
6.235	16.7562	62.366	17.3176
6.24	16.7534	62.407	17.3213
6.244	16.7512	62.449	17.3239
6.248	16.751	62.49	17.3254
6.252	16.7564	62.532	17.3272
6.256	16.7579	62.574	17.3308
6.26	16.7544	62.615	17.3352
6.264	16.751	62.657	17.3366
6.269	16.7483	62.698	17.3356
6.273	16.7458	62.74	17.3386
6.277	16.7446	62.781	17.3429
6.281	16.7437	62.823	17.3466
6.285	16.7452	62.864	17.3508
6.289	16.7516	62.906	17.3547
6.294	16.7566	62.947	17.358
6.298	16.759	62.989	17.3615
6.302	16.7613	63.03	17.3645
6.306	16.7609	63.072	17.3655
6.31	16.76	63.113	17.3688
6.314	16.7569	63.155	17.3738
6.318	16.7528	63.196	17.3779
6.323	16.7463	63.238	17.3834
6.327	16.7365	63.279	17.3876
6.331	16.7287	63.321	17.39
6.335	16.7281	63.362	17.3906
6.339	16.7274	63.404	17.3895
6.343	16.7225	63.445	17.3899
6.347	16.7171	63.487	17.392
6.352	16.7109	63.529	17.395
6.356	16.7046	63.57	17.3997
6.36	16.7017	63.612	17.4036
6.364	16.7044	63.653	17.4059
6.368	16.7064	63.695	17.4092
6.372	16.7058	63.736	17.4116
6.377	16.7053	63.778	17.4124
6.381	16.7033	63.819	17.416
6.385	16.7011	63.861	17.4177
6.389	16.692	63.902	17.4206
6.393	16.6811	63.944	17.4265
6.397	16.6712	63.985	17.4329
6.401	16.6642	64.027	17.4386
6.406	16.6556	64.068	17.4422
6.41	16.645	64.11	17.4445
6.414	16.6341	64.151	17.4468
6.418	16.6254	64.193	17.4475
6.422	16.6178	64.234	17.4484
6.426	16.6145	64.276	17.4495
6.43	16.612	64.317	17.4514
6.435	16.6077	64.359	17.4538
6.439	16.5964	64.4	17.457
6.443	16.5866	64.442	17.4629
6.447	16.5802	64.484	17.466
6.451	16.574	64.525	17.4719
6.455	16.5685	64.567	17.474
6.46	16.5633	64.608	17.4759
6.464	16.5553	64.65	17.4794
6.468	16.5469	64.691	17.4825
6.472	16.5392	64.733	17.4855
6.476	16.5338	64.774	17.4877
6.48	16.5271	64.816	17.4881
6.484	16.5187	64.857	17.4916
6.489	16.5101	64.899	17.4981
6.493	16.5079	64.94	17.5037
6.497	16.5073	64.982	17.5069
6.501	16.5014	65.023	17.5095
6.505	16.4948	65.065	17.5111
6.509	16.4897	65.106	17.5133
6.514	16.4868	65.148	17.5153
6.518	16.4852	65.189	17.5197
6.522	16.4846	65.231	17.5242
6.526	16.4841	65.272	17.5257
6.53	16.4796	65.314	17.5274
6.534	16.474	65.355	17.53
6.538	16.4737	65.397	17.5337
6.543	16.4743	65.439	17.5354
6.547	16.473	65.48	17.5353
6.551	16.4685	65.522	17.5344
6.555	16.465	65.563	17.5346
6.559	16.4628	65.605	17.5361
6.563	16.4608	65.646	17.5385
6.567	16.4615	65.688	17.544
6.572	16.4627	65.729	17.5495
6.576	16.4596	65.771	17.5535
6.58	16.4557	65.812	17.5571
6.584	16.4532	65.854	17.5585
6.588	16.4524	65.895	17.5585
6.592	16.4513	65.937	17.5605
6.597	16.4494	65.978	17.562
6.601	16.448	66.02	17.5657
6.605	16.4516	66.061	17.5698
6.609	16.4559	66.103	17.5708
6.613	16.4556	66.144	17.5746
6.617	16.4543	66.186	17.5783
6.621	16.4519	66.227	17.5806
6.626	16.4486	66.269	17.5839
6.63	16.4479	66.31	17.5866
6.634	16.4492	66.352	17.5879
6.638	16.4509	66.394	17.5913
6.642	16.4477	66.435	17.5957
6.646	16.4432	66.477	17.6
6.651	16.4391	66.518	17.6017
6.655	16.435	66.56	17.6045
6.659	16.4295	66.601	17.6058
6.663	16.4227	66.643	17.6035
6.667	16.4185	66.684	17.5989
6.671	16.4154	66.726	17.599
6.675	16.4124	66.767	17.6025
6.68	16.4132	66.809	17.6061
6.684	16.4141	66.85	17.6101
6.688	16.4114	66.892	17.6155
6.692	16.4077	66.933	17.6226
6.696	16.4046	66.975	17.6304
6.7	16.4022	67.016	17.6361
6.704	16.4002	67.058	17.6398
6.709	16.3983	67.099	17.6438
6.713	16.3968	67.141	17.6479
6.717	16.3995	67.182	17.6486
6.721	16.4003	67.224	17.6473
6.725	16.3965	67.265	17.6488
6.729	16.3914	67.307	17.6515
6.734	16.3838	67.349	17.6553
6.738	16.3744	67.39	17.6619
6.742	16.3679	67.432	17.6695
6.746	16.3627	67.473	17.675
6.75	16.3575	67.515	17.679
6.754	16.352	67.556	17.6811
6.758	16.3484	67.598	17.6833
6.763	16.3467	67.639	17.6827
6.767	16.3454	67.681	17.6819
6.771	16.3416	67.722	17.6835
6.775	16.3358	67.764	17.6885
6.779	16.3279	67.805	17.6924
6.783	16.3193	67.847	17.6928
6.788	16.3117	67.888	17.6958
6.792	16.3073	67.93	17.6978
6.796	16.3044	67.971	17.6986
6.8	16.3016	68.013	17.7026
6.804	16.2987	68.054	17.7074
6.808	16.2957	68.096	17.7109
6.812	16.2916	68.137	17.714
6.817	16.2846	68.179	17.7171
6.821	16.2763	68.22	17.7202
6.825	16.271	68.262	17.723
6.829	16.2704	68.304	17.7257
6.833	16.2692	68.345	17.7302
6.837	16.2661	68.387	17.7342
6.841	16.2625	68.428	17.7361
6.846	16.2557	68.47	17.7389
6.85	16.2485	68.511	17.7433
6.854	16.244	68.553	17.746
6.858	16.2408	68.594	17.7463
6.862	16.2357	68.636	17.7466
6.866	16.2288	68.677	17.7484
6.871	16.2227	68.719	17.7533
6.875	16.2175	68.76	17.7586
6.879	16.2128	68.802	17.7616
6.883	16.2099	68.843	17.7632
6.887	16.2071	68.885	17.7649
6.891	16.203	68.926	17.7645
6.895	16.1983	68.968	17.7662
6.9	16.1935	69.009	17.7688
6.904	16.1888	69.051	17.771
6.908	16.1849	69.092	17.7747
6.912	16.1815	69.134	17.7777
6.916	16.1789	69.175	17.7805
6.92	16.179	69.217	17.7834
6.925	16.1773	69.259	17.7861
6.929	16.1716	69.3	17.7893
6.933	16.1647	69.342	17.7927
6.937	16.1598	69.383	17.7963
6.941	16.1573	69.425	17.8015
6.945	16.1584	69.466	17.8075
6.949	16.162	69.508	17.812
6.954	16.1645	69.549	17.8159
6.958	16.1643	69.591	17.8196
6.962	16.1632	69.632	17.8226
6.966	16.1628	69.674	17.826
6.97	16.1627	69.715	17.829
6.974	16.1615	69.757	17.8324
6.978	16.1599	69.798	17.8344
6.983	16.1628	69.84	17.8356
6.987	16.169	69.881	17.8382
6.991	16.1761	69.923	17.8409
6.995	16.1846	69.964	17.8428
6.999	16.188	70.006	17.8458
7.003	16.1831	70.047	17.8515
7.008	16.1756	70.089	17.8567
7.012	16.1674	70.131	17.8578
7.016	16.1581	70.172	17.8577
7.02	16.147	70.214	17.8589
7.024	16.1346	70.255	17.8628
7.028	16.1249	70.297	17.8681
7.032	16.1197	70.338	17.8727
7.037	16.1148	70.38	17.8769
7.041	16.1081	70.421	17.8804
7.045	16.1008	70.463	17.8822
7.049	16.0906	70.504	17.8839
7.053	16.0775	70.546	17.8857
7.057	16.0642	70.587	17.8879
7.062	16.0509	70.629	17.8899
7.066	16.0372	70.67	17.8912
7.07	16.0225	70.712	17.8944
7.074	16.0077	70.753	17.8985
7.078	15.9931	70.795	17.9
7.082	15.9778	70.836	17.9008
7.086	15.9586	70.878	17.9031
7.091	15.9359	70.919	17.9063
7.095	15.9145	70.961	17.9114
7.099	15.894	71.002	17.916
7.103	15.8784	71.044	17.9196
7.107	15.8716	71.086	17.9238
7.111	15.8663	71.127	17.9287
7.115	15.859	71.169	17.9305
7.12	15.8518	71.21	17.9308
7.124	15.8464	71.252	17.9335
7.128	15.8424	71.293	17.9373
7.132	15.8381	71.335	17.9419
7.136	15.8335	71.376	17.9463
7.14	15.8298	71.418	17.9485
7.145	15.8278	71.459	17.951
7.149	15.8239	71.501	17.9538
7.153	15.8153	71.542	17.9533
7.157	15.8058	71.584	17.9536
7.161	15.7964	71.625	17.9561
7.165	15.7876	71.667	17.9575
7.169	15.781	71.708	17.9591
7.174	15.7763	71.75	17.9626
7.178	15.7715	71.791	17.967
7.182	15.7663	71.833	17.9714
7.186	15.7631	71.874	17.974
7.19	15.7637	71.916	17.9755
7.194	15.7638	71.957	17.9784
7.199	15.7628	71.999	17.9817
7.203	15.7607	72.041	17.9849
7.207	15.7587	72.082	17.9894
7.211	15.7569	72.124	17.9922
7.215	15.7561	72.165	17.9938
7.219	15.7576	72.207	17.9946
7.223	15.7581	72.248	17.9946
7.228	15.7554	72.29	17.9935
7.232	15.7525	72.331	17.9909
7.236	15.7499	72.373	17.9899
7.24	15.7474	72.414	17.9931
7.244	15.7443	72.456	17.9982
7.248	15.7407	72.497	18.0034
7.252	15.7391	72.539	18.01
7.257	15.7425	72.58	18.0166
7.261	15.7465	72.622	18.0214
7.265	15.7488	72.663	18.0255
7.269	15.7506	72.705	18.0298
7.273	15.7503	72.746	18.0357
7.277	15.7485	72.788	18.0423
7.282	15.749	72.829	18.0467
7.286	15.7513	72.871	18.0489
7.29	15.7521	72.912	18.0538
7.294	15.7486	72.954	18.0597
7.298	15.7445	72.996	18.0641
7.302	15.7384	73.037	18.0685
7.306	15.7323	73.079	18.0744
7.311	15.7261	73.12	18.0796
7.315	15.7201	73.162	18.0845
7.319	15.7154	73.203	18.0882
7.323	15.7113	73.245	18.0919
7.327	15.7083	73.286	18.0956
7.331	15.7087	73.328	18.0975
7.335	15.7093	73.369	18.1009
7.34	15.7098	73.411	18.1062
7.344	15.7105	73.452	18.1115
7.348	15.7118	73.494	18.1153
7.352	15.713	73.535	18.1172
7.356	15.7118	73.577	18.1197
7.36	15.7095	73.618	18.1216
7.365	15.7078	73.66	18.1225
7.369	15.7072	73.701	18.1231
7.373	15.7027	73.743	18.1246
7.377	15.6921	73.784	18.1273
7.381	15.681	73.826	18.1297
7.385	15.6676	73.867	18.133
7.389	15.6529	73.909	18.1383
7.394	15.6409	73.951	18.1423
7.398	15.63	73.992	18.144
7.402	15.6196	74.034	18.1435
7.406	15.6118	74.075	18.1432
7.41	15.607	74.117	18.146
7.414	15.607	74.158	18.151
7.419	15.6069	74.2	18.154
7.423	15.6054	74.241	18.1567
7.427	15.6024	74.283	18.1587
7.431	15.5944	74.324	18.1563
7.435	15.5859	74.366	18.1549
7.439	15.5774	74.407	18.1568
7.443	15.5693	74.449	18.1588
7.448	15.5628	74.49	18.1628
7.452	15.5583	74.532	18.1688
7.456	15.554	74.573	18.1734
7.46	15.5525	74.615	18.1775
7.464	15.5512	74.656	18.1807
7.468	15.5444	74.698	18.1849
7.472	15.538	74.739	18.1898
7.477	15.5354	74.781	18.1933
7.481	15.5393	74.822	18.1968
7.485	15.5442	74.864	18.2023
7.489	15.5504	74.906	18.2077
7.493	15.5562	74.947	18.2119
7.497	15.5591	74.989	18.2175
7.502	15.5608	75.03	18.2238
7.506	15.5622	75.072	18.2261
7.51	15.5634	75.113	18.2271
7.514	15.5618	75.155	18.23
7.518	15.5551	75.196	18.2333
7.522	15.5512	75.238	18.2371
7.526	15.5491	75.279	18.2414
7.531	15.5474	75.321	18.2453
7.535	15.5509	75.362	18.2496
7.539	15.5544	75.404	18.253
7.543	15.5477	75.445	18.2557
7.547	15.541	75.487	18.2566
7.551	15.5327	75.528	18.2562
7.556	15.5224	75.57	18.2583
7.56	15.5141	75.611	18.263
7.564	15.5077	75.653	18.2677
7.568	15.5015	75.694	18.2724
7.572	15.5013	75.736	18.2764
7.576	15.5	75.777	18.2781
7.58	15.4909	75.819	18.2778
7.585	15.4818	75.861	18.2802
7.589	15.472	75.902	18.2836
7.593	15.4608	75.944	18.2875
7.597	15.4523	75.985	18.2916
7.601	15.445	76.027	18.2948
7.605	15.4377	76.068	18.2968
7.609	15.4307	76.11	18.2993
7.614	15.4241	76.151	18.3027
7.618	15.4183	76.193	18.3066
7.622	15.4125	76.234	18.3135
7.626	15.4039	76.276	18.3197
7.63	15.3934	76.317	18.3256
7.634	15.391	76.359	18.333
7.639	15.3896	76.4	18.3389
7.643	15.3882	76.442	18.345
7.647	15.3973	76.483	18.35
7.651	15.4068	76.525	18.3546
7.655	15.4164	76.566	18.3588
7.659	15.426	76.608	18.3628
7.663	15.4337	76.649	18.3668
7.668	15.4394	76.691	18.37
7.672	15.4367	76.732	18.3724
7.676	15.4336	76.774	18.374
7.68	15.4314	76.816	18.3765
7.684	15.4368	76.857	18.3816
7.688	15.4411	76.899	18.3866
7.693	15.4441	76.94	18.3907
7.697	15.447	76.982	18.3955
7.701	15.4474	77.023	18.4018
7.705	15.4466	77.065	18.4122
7.709	15.4453	77.106	18.4273
7.713	15.444	77.148	18.4423
7.717	15.4424	77.189	18.4556
7.722	15.44	77.231	18.4652
7.726	15.4396	77.272	18.4731
7.73	15.4426	77.314	18.4792
7.734	15.4459	77.355	18.4874
7.738	15.4417	77.397	18.4921
7.742	15.436	77.438	18.495
7.746	15.4302	77.48	18.4974
7.751	15.4243	77.521	18.5001
7.755	15.4183	77.563	18.5038
7.759	15.4122	77.604	18.5057
7.763	15.4056	77.646	18.5055
7.767	15.3968	77.687	18.5044
7.771	15.3876	77.729	18.5056
7.776	15.386	77.771	18.5049
7.78	15.3855	77.812	18.5041
7.784	15.3804	77.854	18.503
7.788	15.3734	77.895	18.502
7.792	15.3678	77.937	18.5019
7.796	15.3633	77.978	18.5027
7.8	15.3578	78.02	18.5043
7.805	15.3502	78.061	18.5074
7.809	15.3422	78.103	18.509
7.813	15.3344	78.144	18.5069
7.817	15.3267	78.186	18.5065
7.821	15.3218	78.227	18.5104
7.825	15.3181	78.269	18.5163
7.83	15.3126	78.31	18.5257
7.834	15.3038	78.352	18.5365
7.838	15.296	78.393	18.5446
7.842	15.2908	78.435	18.5492
7.846	15.2861	78.476	18.5482
7.85	15.2814	78.518	18.5452
7.854	15.2768	78.559	18.5441
7.859	15.2697	78.601	18.5457
7.863	15.2617	78.642	18.5489
7.867	15.2542	78.684	18.5526
7.871	15.2488	78.726	18.5583
7.875	15.2436	78.767	18.5626
7.879	15.2377	78.809	18.566
7.883	15.2316	78.85	18.571
7.888	15.2297	78.892	18.5763
7.892	15.23	78.933	18.5792
7.896	15.2259	78.975	18.582
7.9	15.2193	79.016	18.5836
7.904	15.2136	79.058	18.5843
7.908	15.21	79.099	18.5838
7.913	15.208	79.141	18.5847
7.917	15.208	79.182	18.5873
7.921	15.2086	79.224	18.5894
7.925	15.2066	79.265	18.5907
7.929	15.2033	79.307	18.5941
7.933	15.2025	79.348	18.5981
7.937	15.2027	79.39	18.5979
7.942	15.2015	79.431	18.599
7.946	15.1978	79.473	18.6007
7.95	15.1945	79.514	18.6029
7.954	15.1925	79.556	18.605
7.958	15.1908	79.597	18.6053
7.962	15.1913	79.639	18.6063
7.967	15.1925	79.681	18.6113
7.971	15.1899	79.722	18.6174
7.975	15.1858	79.764	18.6205
7.979	15.1819	79.805	18.6226
7.983	15.1786	79.847	18.6263
7.987	15.175	79.888	18.6299
7.991	15.1705	79.93	18.6339
7.996	15.1656	79.971	18.6372
8	15.1649	80.013	18.6374
8.004	15.167	80.054	18.6374
8.008	15.1687	80.096	18.6403
8.012	15.17	80.137	18.6431
8.016	15.1702	80.179	18.6468
8.02	15.1685	80.22	18.6518
8.025	15.1665	80.262	18.6557
8.029	15.1647	80.303	18.6596
8.033	15.163	80.345	18.6642
8.037	15.1589	80.386	18.6679
8.041	15.1554	80.428	18.6704
8.045	15.1574	80.469	18.6733
8.05	15.1618	80.511	18.6759
8.054	15.1651	80.552	18.6785
8.058	15.1671	80.594	18.682
8.062	15.1674	80.636	18.6863
8.066	15.1665	80.677	18.6914
8.07	15.1656	80.719	18.6969
8.074	15.1683	80.76	18.7013
8.079	15.1715	80.802	18.7039
8.083	15.171	80.843	18.707
8.087	15.1687	80.885	18.7092
8.091	15.1669	80.926	18.7107
8.095	15.1661	80.968	18.7124
8.099	15.1622	81.009	18.7143
8.104	15.1552	81.051	18.7148
8.108	15.1478	81.092	18.7169
8.112	15.1411	81.134	18.7207
8.116	15.1351	81.175	18.7224
8.12	15.1294	81.217	18.7225
8.124	15.1239	81.258	18.725
8.128	15.1181	81.3	18.7296
8.133	15.1119	81.341	18.7353
8.137	15.1049	81.383	18.7405
8.141	15.0973	81.424	18.7428
8.145	15.088	81.466	18.7435
8.149	15.0735	81.507	18.7422
8.153	15.0585	81.549	18.7413
8.157	15.0481	81.591	18.7446
8.162	15.0395	81.632	18.7496
8.166	15.0321	81.674	18.7551
8.17	15.0262	81.715	18.7606
8.174	15.0222	81.757	18.7641
8.178	15.0193	81.798	18.7661
8.182	15.0174	81.84	18.7679
8.187	15.0191	81.881	18.7686
8.191	15.0224	81.923	18.7682
8.195	15.0246	81.964	18.7691
8.199	15.0262	82.006	18.7721
8.203	15.0308	82.047	18.7755
8.207	15.038	82.089	18.7801
8.211	15.0379	82.13	18.7857
8.216	15.0312	82.172	18.7892
8.22	15.0244	82.213	18.7923
8.224	15.0173	82.255	18.7957
8.228	15.0113	82.296	18.7981
8.232	15.007	82.338	18.7989
8.236	15.0032	82.379	18.8004
8.241	15.0001	82.421	18.8046
8.245	14.9981	82.463	18.8107
8.249	14.9977	82.504	18.8138
8.253	14.9985	82.546	18.815
8.257	14.9971	82.587	18.8173
8.261	14.9913	82.629	18.8206
8.265	14.985	82.67	18.8244
8.27	14.9814	82.712	18.8273
8.274	14.9781	82.753	18.8294
8.278	14.9735	82.795	18.8326
8.282	14.9675	82.836	18.8359
8.286	14.9609	82.878	18.8383
8.29	14.9538	82.919	18.8414
8.294	14.9473	82.961	18.8449
[truncated: 49,572 more rows]

## Sheet: AIEX
Volume (mL)	Abs 280 nm (mAU)	Volume (mL)	%B
0.002	0.304104	0.049	0
0.009	0.296868	0.119	0
0.016	0.267116	0.19	0
0.023	0.24114	0.26	0
0.03	0.236332	0.331	0
0.037	0.226435	0.401	0
0.044	0.221803	0.472	0
0.051	0.223994	0.542	0
0.058	0.22209	0.613	0
0.065	0.222742	0.683	0
0.072	0.226485	0.754	0
0.079	0.231602	0.824	0
0.086	0.237036	0.894	0
0.093	0.235844	0.965	0
0.1	0.23235	1.035	0
0.107	0.234674	1.106	0
0.114	0.241672	1.176	0
0.121	0.247717	1.247	0
0.129	0.249819	1.317	0
0.136	0.256696	1.388	0
0.143	0.265356	1.458	0
0.15	0.265676	1.529	0
0.157	0.258399	1.599	0
0.164	0.249601	1.67	0
0.171	0.244705	1.74	0
0.178	0.239689	1.811	0
0.185	0.234406	1.881	0
0.192	0.231246	1.952	0
0.199	0.228757	2.022	0
0.206	0.228684	2.093	0
0.213	0.229873	2.163	0
0.22	0.228609	2.234	0
0.227	0.216846	2.304	0
0.234	0.199258	2.375	0
0.241	0.185038	2.445	0
0.248	0.186457	2.516	0
0.255	0.199821	2.586	0
0.262	0.212194	2.657	0
0.269	0.22092	2.727	0
0.277	0.226161	2.798	0
0.284	0.233406	2.868	0
0.291	0.239505	2.939	0
0.298	0.245858	3.009	0
0.305	0.255257	3.08	0
0.312	0.261952	3.15	0
0.319	0.266068	3.221	0
0.326	0.272424	3.291	0
0.333	0.289125	3.362	0
0.34	0.303771	3.432	0
0.347	0.305363	3.503	0
0.354	0.300432	3.573	0
0.361	0.299315	3.644	0
0.368	0.304052	3.714	0
0.375	0.305247	3.785	0
0.382	0.304681	3.855	0
0.389	0.302413	3.926	0
0.396	0.297465	3.996	0
0.403	0.289621	4.066	0
0.41	0.280657	4.137	0
0.417	0.272804	4.207	0
0.425	0.267659	4.278	0
0.432	0.264293	4.348	0
0.439	0.262715	4.419	0
0.446	0.262635	4.489	0
0.453	0.258695	4.56	0
0.46	0.250294	4.63	0
0.467	0.241246	4.701	0
0.474	0.234393	4.771	0
0.481	0.232243	4.842	0
0.488	0.232283	4.912	0
0.495	0.233466	4.983	0
0.502	0.23543	5.053	0
0.509	0.234296	5.124	0
0.516	0.231899	5.194	0
0.523	0.23442	5.265	0
0.53	0.23944	5.335	0
0.537	0.241417	5.406	0
0.544	0.239349	5.476	0
0.551	0.238312	5.547	0
0.558	0.242756	5.617	0
0.565	0.249718	5.688	0
0.573	0.255123	5.758	0
0.58	0.26119	5.829	0
0.587	0.267384	5.899	0
0.594	0.272643	5.97	0
0.601	0.279886	6.04	0
0.608	0.289357	6.111	0
0.615	0.29935	6.181	0
0.622	0.308123	6.252	0
0.629	0.308005	6.322	0
0.636	0.298537	6.393	0
0.643	0.289062	6.463	0
0.65	0.28726	6.534	0
0.657	0.29138	6.604	0
0.664	0.292755	6.675	0
0.671	0.292805	6.745	0
0.678	0.292677	6.816	0
0.685	0.290709	6.886	0
0.692	0.285713	6.957	0
0.699	0.279724	7.027	0
0.706	0.270117	7.098	0
0.713	0.258498	7.168	0
0.721	0.2491	7.238	0
0.728	0.242872	7.309	0
0.735	0.23952	7.379	0
0.742	0.244637	7.45	0
0.749	0.245101	7.52	0
0.756	0.239112	7.591	0
0.763	0.235758	7.661	0
0.77	0.240044	7.732	0
0.777	0.24361	7.802	0
0.784	0.241457	7.873	0
0.791	0.239029	7.943	0
0.798	0.237967	8.014	0
0.805	0.234407	8.084	0
0.812	0.23379	8.155	0
0.819	0.238397	8.225	0
0.826	0.245662	8.296	0
0.833	0.249718	8.366	0
0.84	0.254103	8.437	0
0.847	0.260434	8.507	0
0.854	0.26915	8.578	0
0.861	0.27362	8.648	0
0.869	0.267998	8.719	0
0.876	0.261153	8.789	0
0.883	0.257968	8.86	0
0.89	0.259172	8.93	0
0.897	0.254801	9.001	0
0.904	0.251007	9.071	0
0.911	0.251817	9.142	0
0.918	0.257505	9.212	0
0.925	0.257613	9.283	0
0.932	0.235867	9.353	0
0.939	0.2078	9.424	0
0.946	0.18211	9.494	0
0.953	0.164163	9.565	0
0.96	0.150246	9.635	0
0.967	0.135571	9.706	0
0.974	0.11725	9.776	0
0.981	0.094718	9.847	0
0.988	0.069008	9.917	0
0.995	0.045336	9.988	0
1.002	0.036582	10.058	0
1.009	0.044854	10.129	0
1.017	0.048595	10.199	0
1.024	0.040189	10.27	0
1.031	0.030152	10.34	0
1.038	0.044448	10.41	0
1.045	0.060763	10.481	0
1.052	0.072719	10.551	0
1.059	0.081846	10.622	0
1.066	0.097029	10.692	0
1.073	0.116713	10.763	0
1.08	0.125847	10.833	0
1.087	0.13066	10.904	0
1.094	0.137024	10.974	0
1.101	0.142558	11.045	0
1.108	0.132837	11.115	0
1.115	0.108355	11.186	0
1.122	0.079857	11.256	0
1.129	0.06201	11.327	0
1.136	0.051422	11.397	0
1.143	0.042299	11.468	0
1.15	0.035036	11.538	0
1.157	0.034573	11.609	0
1.165	0.028441	11.679	0
1.172	0.015477	11.75	0
1.179	0.003103	11.82	0
1.186	0.003623	11.891	0
1.193	0.00495	11.961	0
1.2	0.006477	12.032	0
1.207	0.010376	12.102	0
1.214	0.017467	12.173	0
1.221	0.030032	12.243	0
1.228	0.04877	12.314	0
1.235	0.070239	12.384	0
1.242	0.084536	12.455	0
1.249	0.09634	12.525	0
1.256	0.10358	12.596	0
1.263	0.10777	12.666	0
1.27	0.120327	12.737	0
1.277	0.137099	12.807	0
1.284	0.149467	12.878	0
1.291	0.158672	12.948	0
1.298	0.169449	13.019	0
1.305	0.180678	13.089	0
1.313	0.189337	13.16	0
1.32	0.196688	13.23	0
1.327	0.206195	13.301	0
1.334	0.211365	13.371	0
1.341	0.210168	13.442	0
1.348	0.206501	13.512	0
1.355	0.205173	13.582	0
1.362	0.208396	13.653	0
1.369	0.207242	13.723	0
1.376	0.19864	13.794	0
1.383	0.188356	13.864	0
1.39	0.184698	13.935	0
1.397	0.173613	14.005	0
1.404	0.158938	14.076	0
1.411	0.146287	14.146	0
1.418	0.140822	14.217	0
1.425	0.1342	14.287	0
1.432	0.127832	14.358	0
1.439	0.123153	14.428	0
1.446	0.123358	14.499	0
1.453	0.123616	14.569	0
1.461	0.122638	14.64	0
1.468	0.113602	14.71	0
1.475	0.096589	14.781	0
1.482	0.081285	14.851	0
1.489	0.064625	14.922	0
1.496	0.048775	14.992	0
1.503	0.044049	15.063	0
1.51	0.044159	15.133	0
1.517	0.040497	15.204	0
1.524	0.031481	15.274	0
1.531	0.02238	15.345	0
1.538	0.011005	15.415	0
1.545	-0.00308	15.486	0
1.552	-0.01753	15.556	0
1.559	-0.03045	15.627	0
1.566	-0.04223	15.697	0
1.573	-0.04696	15.768	0
1.58	-0.04484	15.838	0
1.587	-0.03998	15.909	0
1.594	-0.03243	15.979	0
1.601	-0.0242	16.05	0
1.609	-0.01725	16.12	0
1.616	-0.01232	16.191	0
1.623	-0.00205	16.261	0
1.63	0.009168	16.332	0
1.637	0.023292	16.402	0
1.644	0.041774	16.473	0
1.651	0.062325	16.543	0
1.658	0.082865	16.614	0
1.665	0.10286	16.684	0
1.672	0.119179	16.754	0
1.679	0.119977	16.825	0
1.686	0.118259	16.895	0
1.693	0.129779	16.966	0
1.7	0.15306	17.036	0
1.707	0.173618	17.107	0
1.714	0.179573	17.177	0
1.721	0.17989	17.248	0
1.728	0.176715	17.318	0
1.735	0.176956	17.389	0
1.742	0.172753	17.459	0
1.749	0.163305	17.53	0
1.757	0.152799	17.6	0
1.764	0.142611	17.671	0
1.771	0.129542	17.741	0
1.778	0.122932	17.812	0
1.785	0.129662	17.882	0
1.792	0.141972	17.953	0
1.799	0.133526	18.023	0
1.806	0.116647	18.094	0
1.813	0.102591	18.164	0
1.82	0.108448	18.235	0
1.827	0.13306	18.305	0
1.834	0.157452	18.376	0
1.841	0.174783	18.446	0
1.848	0.185431	18.517	0
1.855	0.198494	18.587	0
1.862	0.207058	18.658	0
1.869	0.211908	18.728	0
1.876	0.219752	18.799	0
1.883	0.236167	18.869	0
1.89	0.250663	18.94	0
1.897	0.260648	19.01	0
1.905	0.269173	19.081	0
1.912	0.281096	19.151	0
1.919	0.290783	19.222	0
1.926	0.291939	19.292	0
1.933	0.274075	19.363	0
1.94	0.252161	19.433	0
1.947	0.236953	19.504	0
1.954	0.230757	19.574	0
1.961	0.229743	19.645	0
1.968	0.236063	19.715	0
1.975	0.259172	19.786	0
1.982	0.28405	19.856	0
1.989	0.302451	19.926	0
1.996	0.322852	19.997	0
2.003	0.344362	20.067	0
2.01	0.356507	20.138	0
2.017	0.362678	20.208	0
2.024	0.373951	20.279	0
2.031	0.393769	20.349	0
2.038	0.416913	20.42	0
2.045	0.439083	20.49	0
2.053	0.454051	20.561	0
2.06	0.462957	20.631	0
2.067	0.47632	20.702	0
2.074	0.489634	20.772	0
2.081	0.489232	20.843	0
2.088	0.481412	20.913	0
2.095	0.471537	20.984	0
2.102	0.46025	21.054	0
2.109	0.450011	21.125	0
2.116	0.453769	21.195	0
2.123	0.460179	21.266	0
2.13	0.464529	21.336	0
2.137	0.462067	21.407	0
2.144	0.466415	21.477	0
2.151	0.478544	21.548	0
2.158	0.49264	21.618	0
2.165	0.503011	21.689	0
2.172	0.504861	21.759	0
2.179	0.497678	21.83	0
2.186	0.490933	21.9	0
2.193	0.489935	21.971	0
2.201	0.495331	22.041	0
2.208	0.499668	22.112	0
2.215	0.502795	22.182	0
2.222	0.50557	22.253	0
2.229	0.509421	22.323	0
2.236	0.522635	22.394	0
2.243	0.533888	22.464	0
2.25	0.541113	22.535	0
2.257	0.551429	22.605	0
2.264	0.565338	22.676	0
2.271	0.579087	22.746	0
2.278	0.594491	22.817	0
2.285	0.6181	22.887	0
2.292	0.650523	22.958	0
2.299	0.679574	23.028	0
2.306	0.703955	23.098	0
2.313	0.728239	23.169	0
2.32	0.751638	23.239	0
2.327	0.765724	23.31	0
2.334	0.775351	23.38	0
2.341	0.778106	23.451	0
2.349	0.785028	23.521	0
2.356	0.788827	23.592	0
2.363	0.790969	23.662	0
2.37	0.793623	23.733	0
2.377	0.79943	23.803	0
2.384	0.814739	23.874	0
2.391	0.826048	23.944	0
2.398	0.829983	24.015	0
2.405	0.832077	24.085	0
2.412	0.834433	24.156	0
2.419	0.844687	24.226	0
2.426	0.860238	24.297	0
2.433	0.878208	24.367	0
2.44	0.874947	24.438	0
2.447	0.865968	24.508	0
2.454	0.858763	24.579	0
2.461	0.856095	24.649	0
2.468	0.853733	24.72	0
2.475	0.857751	24.79	0
2.482	0.860475	24.861	0
2.489	0.855692	24.931	0
2.497	0.84939	25.002	0
2.504	0.845625	25.072	0
2.511	0.843164	25.143	0
2.518	0.840466	25.213	0
2.525	0.828971	25.284	0
2.532	0.822651	25.354	0
2.539	0.82909	25.425	0
2.546	0.850219	25.495	0
2.553	0.863766	25.566	0
2.56	0.870357	25.636	0
2.567	0.883083	25.707	0
2.574	0.900281	25.777	0
2.581	0.910249	25.848	0
2.588	0.916844	25.918	0
2.595	0.923729	25.989	0
2.602	0.926406	26.059	0
2.609	0.919791	26.13	0
2.616	0.912734	26.2	0
2.623	0.917944	26.27	0
2.63	0.927645	26.341	0
2.637	0.931042	26.411	0
2.645	0.925012	26.482	0
2.652	0.923835	26.552	0
2.659	0.930274	26.623	0
2.666	0.941345	26.693	0
2.673	0.941351	26.764	0
2.68	0.938322	26.834	0
2.687	0.936057	26.905	0
2.694	0.936744	26.975	0
2.701	0.948227	27.046	0
2.708	0.971698	27.116	0
2.715	0.997421	27.187	0
2.722	1.01162	27.257	0
2.729	1.01125	27.328	0
2.736	1.01619	27.398	0
2.743	1.02954	27.469	0
2.75	1.05159	27.539	0
2.757	1.05748	27.61	0
2.764	1.05921	27.68	0
2.771	1.06157	27.751	0
2.778	1.07176	27.821	0
2.785	1.08187	27.892	0
2.793	1.08625	27.962	0
2.8	1.08567	28.033	0
2.807	1.0739	28.103	0
2.814	1.06318	28.174	0
2.821	1.05953	28.244	0
2.828	1.06854	28.315	0
2.835	1.08311	28.385	0
2.842	1.08806	28.456	0
2.849	1.07864	28.526	0
2.856	1.07031	28.597	0
2.863	1.07691	28.667	0
2.87	1.08762	28.738	0
2.877	1.09111	28.808	0
2.884	1.08618	28.879	0
2.891	1.07971	28.949	0
2.898	1.08465	29.02	0
2.905	1.10807	29.09	0
2.912	1.13343	29.161	0
2.919	1.14822	29.231	0
2.926	1.14895	29.302	0
2.933	1.14305	29.372	0
2.941	1.14133	29.442	0
2.948	1.1447	29.513	0
2.955	1.15778	29.583	0
2.962	1.17442	29.654	0
2.969	1.18857	29.724	0
2.976	1.1971	29.795	0
2.983	1.20155	29.865	0
2.99	1.21043	29.936	0
2.997	1.21528	30.006	0
3.004	1.21073	30.077	0
3.011	1.19023	30.147	0
3.018	1.17036	30.218	0
3.025	1.16342	30.288	0
3.032	1.16625	30.359	0
3.039	1.1685	30.429	0
3.046	1.16237	30.5	0
3.053	1.17255	30.57	0
3.06	1.18343	30.641	0
3.067	1.19199	30.711	0
3.074	1.19272	30.782	0
3.081	1.19767	30.852	0
3.089	1.20278	30.923	0
3.096	1.20532	30.993	0
3.103	1.21359	31.064	0
3.11	1.21861	31.134	0
3.117	1.22176	31.205	0
3.124	1.22646	31.275	0
3.131	1.23713	31.346	0
3.138	1.24731	31.416	0
3.145	1.2569	31.487	0
3.152	1.26266	31.557	0
3.159	1.2536	31.628	0
3.166	1.24677	31.698	0
3.173	1.2433	31.769	0
3.18	1.24666	31.839	0
3.187	1.25876	31.91	0
3.194	1.27432	31.98	0
3.201	1.28417	32.051	0
3.208	1.28661	32.121	0
3.215	1.29364	32.192	0
3.222	1.31315	32.262	0
3.229	1.33345	32.333	0
3.237	1.34763	32.403	0
3.244	1.35597	32.474	0
3.251	1.36343	32.544	0
3.258	1.37704	32.614	0
3.265	1.4006	32.685	0
3.272	1.42169	32.755	0
3.279	1.44062	32.826	0
3.286	1.45562	32.896	0
3.293	1.4642	32.967	0
3.3	1.47449	33.037	0
3.307	1.49585	33.108	0
3.314	1.51238	33.178	0
3.321	1.51505	33.249	0
3.328	1.50158	33.319	0
3.335	1.48962	33.39	0
3.342	1.48075	33.46	0
3.349	1.48091	33.531	0
3.356	1.49408	33.601	0
3.363	1.49945	33.672	0
3.37	1.48959	33.742	0
3.377	1.4718	33.813	0
3.385	1.45547	33.883	0
3.392	1.43652	33.954	0
3.399	1.41616	34.024	0
3.406	1.39991	34.095	0
3.413	1.39704	34.165	0
3.42	1.40888	34.236	0
3.427	1.42344	34.306	0
3.434	1.43521	34.377	0
3.441	1.44229	34.447	0
3.448	1.44341	34.518	0
3.455	1.43814	34.588	0
3.462	1.42558	34.659	0
3.469	1.41787	34.729	0
3.476	1.42193	34.8	0
3.483	1.43705	34.87	0
3.49	1.45469	34.941	0
3.497	1.47646	35.011	0
3.504	1.50239	35.082	0
3.511	1.5185	35.152	0
3.518	1.52128	35.223	0
3.525	1.52118	35.293	0
3.533	1.52897	35.364	0
3.54	1.54208	35.434	0
3.547	1.55832	35.505	0
3.554	1.57587	35.575	0
3.561	1.58734	35.646	0
3.568	1.59189	35.716	0
3.575	1.59694	35.786	0
3.582	1.60157	35.857	0
3.589	1.60024	35.927	0
3.596	1.59886	35.998	0
3.603	1.59528	36.068	0
3.61	1.5859	36.139	0
3.617	1.57279	36.209	0
3.624	1.56521	36.28	0
3.631	1.5806	36.35	0
3.638	1.59885	36.421	0
3.645	1.60497	36.491	0
3.652	1.59338	36.562	0
3.659	1.5868	36.632	0
3.666	1.58629	36.703	0
3.673	1.58648	36.773	0
3.681	1.58479	36.844	0
3.688	1.59306	36.914	0
3.695	1.60278	36.985	0
3.702	1.61265	37.055	0
3.709	1.62373	37.126	0
3.716	1.63941	37.196	0
3.723	1.65016	37.267	0
3.73	1.65706	37.337	0
3.737	1.64496	37.408	0
3.744	1.64572	37.478	0
3.751	1.65979	37.549	0
3.758	1.67884	37.619	0
3.765	1.69079	37.69	0
3.772	1.70057	37.76	0
3.779	1.712	37.831	0
3.786	1.72022	37.901	0
3.793	1.717	37.972	0
3.8	1.70367	38.042	0
3.807	1.68871	38.113	0
3.814	1.67784	38.183	0
3.821	1.6758	38.254	0
3.829	1.68197	38.324	0
3.836	1.69132	38.395	0
3.843	1.69402	38.465	0
3.85	1.68314	38.536	0
3.857	1.6631	38.606	0
3.864	1.65457	38.677	0
3.871	1.65801	38.747	0
3.878	1.6671	38.818	0
3.885	1.6731	38.888	0
3.892	1.67396	38.958	0
3.899	1.67805	39.029	0
3.906	1.6895	39.099	0
3.913	1.70179	39.17	0
3.92	1.70667	39.24	0
3.927	1.71693	39.311	0
3.934	1.73274	39.381	0
3.941	1.7461	39.452	0
3.948	1.76246	39.522	0
3.955	1.78426	39.593	0
3.962	1.81169	39.663	0
3.969	1.83488	39.734	0
3.976	1.84643	39.804	0
3.984	1.85444	39.875	0
3.991	1.86364	39.945	0
3.998	1.87685	40.016	0
4.005	1.88707	40.086	0
4.012	1.89613	40.157	0
4.019	1.9022	40.227	0
4.026	1.90265	40.298	0
4.033	1.89067	40.368	0
4.04	1.87027	40.439	0
4.047	1.8464	40.509	0
4.054	1.81976	40.58	0
4.061	1.80498	40.65	0
4.068	1.79421	40.721	0
4.075	1.78604	40.791	0
4.082	1.77688	40.862	0
4.089	1.76841	40.932	0
4.096	1.76634	41.003	0
4.103	1.76994	41.073	0
4.11	1.7758	41.144	0
4.117	1.774	41.214	0
4.124	1.77356	41.285	0
4.132	1.77397	41.355	0
4.139	1.76938	41.426	0
4.146	1.76989	41.496	0
4.153	1.77581	41.567	0
4.16	1.78181	41.637	0
4.167	1.77779	41.708	0
4.174	1.77182	41.778	0
4.181	1.76651	41.849	0
4.188	1.76275	41.919	0
4.195	1.7605	41.99	0
4.202	1.74959	42.06	0
4.209	1.73171	42.13	0
4.216	1.7129	42.201	0
4.223	1.70594	42.271	0
4.23	1.71227	42.342	0
4.237	1.72468	42.412	0
4.244	1.73714	42.483	0
4.251	1.74333	42.553	0
4.258	1.74499	42.624	0
4.265	1.74581	42.694	0
4.272	1.74726	42.765	0
4.28	1.75002	42.835	0
4.287	1.74969	42.906	0
4.294	1.74799	42.976	0
4.301	1.74997	43.047	0
4.308	1.75747	43.117	0
4.315	1.77234	43.188	0
4.322	1.79321	43.258	0
4.329	1.81078	43.329	0
4.336	1.8135	43.399	0
4.343	1.81118	43.47	0
4.35	1.81493	43.54	0
4.357	1.82206	43.611	0
4.364	1.8288	43.681	0
4.371	1.83504	43.752	0
4.378	1.84423	43.822	0
4.385	1.85459	43.893	0
4.392	1.86818	43.963	0
4.399	1.88351	44.034	0
4.406	1.89191	44.104	0
4.413	1.89685	44.175	0
4.42	1.90089	44.245	0
4.428	1.898	44.316	0
4.435	1.89171	44.386	0
4.442	1.88843	44.457	0
4.449	1.89018	44.527	0
4.456	1.89323	44.598	0
4.463	1.89672	44.668	0
4.47	1.90163	44.739	0
4.477	1.90616	44.809	0
4.484	1.90716	44.88	0
4.491	1.89739	44.95	0
4.498	1.88555	45.021	0
4.505	1.87238	45.091	0
4.512	1.8588	45.162	0
4.519	1.84549	45.232	0
4.526	1.83393	45.302	0
4.533	1.82466	45.373	0
4.54	1.82026	45.443	0
4.547	1.82331	45.514	0
4.554	1.82593	45.584	0
4.561	1.83324	45.655	0
4.568	1.84677	45.725	0
4.576	1.85837	45.796	0
4.583	1.85833	45.866	0
4.59	1.85677	45.937	0
4.597	1.86262	46.007	0
4.604	1.8619	46.078	0
4.611	1.86108	46.148	0
4.618	1.87356	46.219	0
4.625	1.90011	46.289	0
4.632	1.92426	46.36	0
4.639	1.94517	46.43	0
4.646	1.96256	46.501	0
4.653	1.97461	46.571	0
4.66	1.99069	46.642	0
4.667	1.99847	46.712	0
4.674	1.9938	46.783	0
4.681	1.98649	46.853	0
4.688	1.99171	46.924	0
4.695	2.00238	46.994	0
4.702	2.01617	47.065	0
4.709	2.03254	47.135	0
4.716	2.04251	47.206	0
4.724	2.03344	47.276	0
4.731	2.02524	47.347	0
4.738	2.03042	47.417	0
4.745	2.03879	47.488	0
4.752	2.0442	47.558	0
4.759	2.04525	47.629	0
4.766	2.04134	47.699	0
4.773	2.02365	47.77	0
4.78	2.01448	47.84	0
4.787	2.01005	47.911	0
4.794	2.00787	47.981	0
4.801	2.00349	48.052	0
4.808	1.99971	48.122	0
4.815	2.00121	48.193	0
4.822	2.00717	48.263	0
4.829	2.01277	48.334	0
4.836	2.00516	48.404	0
4.843	1.98986	48.474	0
4.85	1.97571	48.545	0
4.857	1.96496	48.615	0
4.864	1.9644	48.686	0
4.872	1.97015	48.756	0
4.879	1.98862	48.827	0
4.886	2.00338	48.897	0
4.893	2.01478	48.968	0
4.9	2.02555	49.038	0
4.907	2.03793	49.109	0
4.914	2.04838	49.179	0
4.921	2.05088	49.25	0
4.928	2.05088	49.32	0
4.935	2.05285	49.391	0
4.942	2.06201	49.461	0
4.949	2.07115	49.532	0
4.956	2.08144	49.602	0
4.963	2.09397	49.673	0
4.97	2.09701	49.743	0
4.977	2.0953	49.814	0
4.984	2.09335	49.884	0
4.991	2.09392	49.955	0
4.998	2.08833	50.025	0
5.005	2.0804	50.096	0
5.012	2.07151	50.166	0
5.02	2.06478	50.237	0
5.027	2.06583	50.307	0
5.034	2.06162	50.378	0
5.041	2.05154	50.448	0
5.048	2.03824	50.519	0
5.055	2.0345	50.589	0
5.062	2.02901	50.66	0
5.069	2.02434	50.73	0
5.076	2.02475	50.801	0
5.083	2.02974	50.871	0
5.09	2.02208	50.942	0
5.097	2.01165	51.012	0
5.104	2.0087	51.083	0
5.111	2.02057	51.153	0
5.118	2.03238	51.224	0
5.125	2.03901	51.294	0
5.132	2.04143	51.365	0
5.139	2.05157	51.435	0
5.146	2.06419	51.506	0
5.153	2.07199	51.576	0
5.16	2.07058	51.646	0
5.168	2.06752	51.717	0
5.175	2.05965	51.787	0
5.182	2.05216	51.858	0
5.189	2.04881	51.928	0
5.196	2.05852	51.999	0
5.203	2.05908	52.069	0
5.21	2.05227	52.14	0
5.217	2.04017	52.21	0
5.224	2.04025	52.281	0
5.231	2.04767	52.351	0
5.238	2.05253	52.422	0
5.245	2.05332	52.492	0
5.252	2.05213	52.563	0
5.259	2.05061	52.633	0
5.266	2.05007	52.704	0
5.273	2.05323	52.774	0
5.28	2.06155	52.845	0
5.287	2.06671	52.915	0
5.294	2.07336	52.986	0
5.301	2.08474	53.056	0
5.308	2.10565	53.127	0
5.316	2.12549	53.197	0
5.323	2.13565	53.268	0
5.33	2.14138	53.338	0
5.337	2.15376	53.409	0
5.344	2.17365	53.479	0
5.351	2.18059	53.55	0
5.358	2.18119	53.62	0
5.365	2.18331	53.691	0
5.372	2.19013	53.761	0
5.379	2.19316	53.832	0
5.386	2.18794	53.902	0
5.393	2.17849	53.973	0
5.4	2.1662	54.043	0
5.407	2.1568	54.114	0
5.414	2.14862	54.184	0
5.421	2.14181	54.255	0
5.428	2.13632	54.325	0
5.435	2.12468	54.396	0
5.442	2.10542	54.466	0
5.449	2.08316	54.537	0
5.456	2.08152	54.607	0
5.464	2.09487	54.678	0
5.471	2.10892	54.748	0
5.478	2.11477	54.818	0
5.485	2.11131	54.889	0
5.492	2.11233	54.959	0
5.499	2.1137	55.03	0
5.506	2.11187	55.1	0
5.513	2.10683	55.171	0
5.52	2.10574	55.241	0
5.527	2.10603	55.312	0
5.534	2.10678	55.382	0
5.541	2.11534	55.453	0
5.548	2.12907	55.523	0
5.555	2.15093	55.594	0
5.562	2.17718	55.664	0
5.569	2.18834	55.735	0
5.576	2.17839	55.805	0
5.583	2.17042	55.876	0
5.59	2.17094	55.946	0
5.597	2.17256	56.017	0
5.604	2.17728	56.087	0
5.612	2.18407	56.158	0
5.619	2.19071	56.228	0
5.626	2.19242	56.299	0
5.633	2.19145	56.369	0
5.64	2.18683	56.44	0
5.647	2.18504	56.51	0
5.654	2.19713	56.581	0
5.661	2.19983	56.651	0
5.668	2.19022	56.722	0
5.675	2.17896	56.792	0
5.682	2.19166	56.863	0
5.689	2.20707	56.933	0
5.696	2.22212	57.004	0
5.703	2.23096	57.074	0
5.71	2.23257	57.145	0
5.717	2.23271	57.215	0
5.724	2.23078	57.286	0
5.731	2.22864	57.356	0
5.738	2.23034	57.427	0
5.745	2.24221	57.497	0
5.752	2.24081	57.568	0
5.76	2.22869	57.638	0
5.767	2.21604	57.709	0
5.774	2.21298	57.779	0
5.781	2.2054	57.85	0
5.788	2.19607	57.92	0
5.795	2.18529	57.99	0
5.802	2.17733	58.061	0
5.809	2.17752	58.131	0
5.816	2.18326	58.202	0
5.823	2.18982	58.272	0
5.83	2.19837	58.343	0
5.837	2.20724	58.413	0
5.844	2.21108	58.484	0
5.851	2.20478	58.554	0
5.858	2.19305	58.625	0
5.865	2.18324	58.695	0
5.872	2.18468	58.766	0
5.879	2.19464	58.836	0
5.886	2.21034	58.907	0
5.893	2.21003	58.977	0
5.9	2.20545	59.048	0
5.908	2.2001	59.118	0
5.915	2.19956	59.189	0
5.922	2.19798	59.259	0
5.929	2.20388	59.33	0
5.936	2.21494	59.4	0
5.943	2.22431	59.471	0
5.95	2.22315	59.541	0
5.957	2.22328	59.612	0
5.964	2.22709	59.682	0
5.971	2.22998	59.753	0
5.978	2.22022	59.823	0
5.985	2.20778	59.894	0
5.992	2.1984	59.964	0
5.999	2.20379	60.035	0
6.006	2.20246	60.105	0
6.013	2.19811	60.176	0
6.02	2.19199	60.246	0
6.027	2.18843	60.317	0
6.034	2.17452	60.387	0
6.041	2.16191	60.458	0
6.048	2.1539	60.528	0
6.056	2.157	60.599	0
6.063	2.16247	60.669	0
6.07	2.16798	60.74	0
6.077	2.1704	60.81	0
6.084	2.16964	60.881	0
6.091	2.16723	60.951	0
6.098	2.16453	61.022	0
6.105	2.1639	61.092	0
6.112	2.17051	61.162	0
6.119	2.18169	61.233	0
6.126	2.18995	61.303	0
6.133	2.20148	61.374	0
6.14	2.21753	61.444	0
6.147	2.2295	61.515	0
6.154	2.23383	61.585	0
6.161	2.23432	61.656	0
6.168	2.2342	61.726	0
6.175	2.23573	61.797	0
6.182	2.24132	61.867	0
6.189	2.25728	61.938	0
6.196	2.27993	62.008	0
6.204	2.30255	62.079	0
6.211	2.30481	62.149	0
6.218	2.30205	62.22	0
6.225	2.29969	62.29	0
6.232	2.30959	62.361	0
6.239	2.31241	62.431	0
6.246	2.30523	62.502	0
6.253	2.29467	62.572	0
6.26	2.29404	62.643	0
6.267	2.29942	62.713	0
6.274	2.30518	62.784	0
6.281	2.30902	62.854	0
6.288	2.31059	62.925	0
6.295	2.30188	62.995	0
6.302	2.28656	63.066	0
6.309	2.27338	63.136	0
6.316	2.27748	63.207	0
6.323	2.28618	63.277	0
6.33	2.28844	63.348	0
6.337	2.28117	63.418	0
6.344	2.27073	63.489	0
6.352	2.26965	63.559	0
6.359	2.27959	63.63	0
6.366	2.29782	63.7	0
6.373	2.31023	63.771	0
6.38	2.31523	63.841	0
6.387	2.31945	63.912	0
6.394	2.32216	63.982	0
6.401	2.31947	64.053	0
6.408	2.3193	64.123	0
6.415	2.31893	64.194	0
6.422	2.31648	64.264	0
6.429	2.31132	64.334	0
6.436	2.30595	64.405	0
6.443	2.30243	64.475	0
6.45	2.30244	64.546	0
6.457	2.30605	64.616	0
6.464	2.29576	64.687	0
6.471	2.2948	64.757	0
6.478	2.30222	64.828	0
6.485	2.31873	64.898	0
6.492	2.33597	64.969	0
6.5	2.35728	65.039	0
6.507	2.37046	65.11	0
6.514	2.36864	65.18	0
6.521	2.36917	65.251	0
6.528	2.37567	65.321	0
6.535	2.3839	65.392	0
6.542	2.39022	65.462	0
6.549	2.3897	65.533	0
6.556	2.38684	65.603	0
6.563	2.38254	65.674	0
6.57	2.3792	65.744	0
6.577	2.35673	65.815	0
6.584	2.33796	65.885	0
6.591	2.3202	65.956	0
6.598	2.30514	66.026	0
6.605	2.29707	66.097	0
6.612	2.30865	66.167	0
6.619	2.33572	66.238	0
6.626	2.36599	66.308	0
6.633	2.3905	66.379	0
6.64	2.40427	66.449	0
6.648	2.41842	66.52	0
6.655	2.43711	66.59	0
6.662	2.45404	66.661	0
6.669	2.46928	66.731	0
6.676	2.48368	66.802	0
6.683	2.49639	66.872	0
6.69	2.50202	66.943	0
6.697	2.50118	67.013	0
6.704	2.49383	67.084	0
6.711	2.48426	67.154	0
6.718	2.48129	67.225	0
6.725	2.47031	67.295	0
6.732	2.44752	67.366	0
6.739	2.42008	67.436	0
6.746	2.40335	67.506	0
6.753	2.39608	67.577	0
6.76	2.39188	67.647	0
6.767	2.38749	67.718	0
6.774	2.37897	67.788	0
6.781	2.37085	67.859	0
6.788	2.36038	67.929	0
6.796	2.34878	68	0
6.803	2.34429	68.07	0
6.81	2.34233	68.141	0
6.817	2.33535	68.211	0
6.824	2.32578	68.282	0
6.831	2.32187	68.352	0
6.838	2.33107	68.423	0
6.845	2.35058	68.493	0
6.852	2.37097	68.564	0
6.859	2.38393	68.634	0
6.866	2.39789	68.705	0
6.873	2.41512	68.775	0
6.88	2.42729	68.846	0
6.887	2.42318	68.916	0
6.894	2.42229	68.987	0
6.901	2.42408	69.057	0
6.908	2.42653	69.128	0
6.915	2.42738	69.198	0
6.922	2.44202	69.269	0
6.929	2.45255	69.339	0
6.936	2.45768	69.41	0
6.944	2.45677	69.48	0
6.951	2.44809	69.551	0
6.958	2.43864	69.621	0
6.965	2.42873	69.692	0
6.972	2.41549	69.762	0
6.979	2.39541	69.833	0
6.986	2.38713	69.903	0
6.993	2.38907	69.974	0
7	2.38843	70.044	0
7.007	2.38556	70.115	0
7.014	2.38516	70.185	0
7.021	2.38302	70.256	0
7.028	2.37033	70.326	0
7.035	2.37897	70.397	0
7.042	2.39135	70.467	0
7.049	2.39932	70.538	0
7.056	2.39785	70.608	0
7.063	2.39633	70.678	0
7.07	2.40218	70.749	0
7.077	2.41341	70.819	0
7.084	2.43085	70.89	0
7.092	2.44794	70.96	0
7.099	2.46667	71.031	0
7.106	2.48828	71.101	0
7.113	2.51036	71.172	0
7.12	2.52908	71.242	0
7.127	2.53385	71.313	0
7.134	2.53135	71.383	0
7.141	2.51232	71.454	0
7.148	2.49374	71.524	0
7.155	2.48656	71.595	0
7.162	2.48147	71.665	0
7.169	2.47317	71.736	0
7.176	2.4576	71.806	0
7.183	2.44703	71.877	0
7.19	2.43816	71.947	0
7.197	2.43328	72.018	0
7.204	2.43322	72.088	0
7.211	2.43175	72.159	0
7.218	2.42691	72.229	0
7.225	2.42364	72.3	0
7.232	2.43206	72.37	0
7.24	2.44609	72.441	0
7.247	2.45974	72.511	0
7.254	2.47001	72.582	0
7.261	2.47634	72.652	0
7.268	2.48719	72.723	0
7.275	2.50039	72.793	0
7.282	2.51205	72.864	0
7.289	2.51526	72.934	0
7.296	2.51052	73.005	0
7.303	2.49996	73.075	0
7.31	2.49489	73.146	0
7.317	2.49689	73.216	0
7.324	2.50194	73.287	0
7.331	2.52177	73.357	0.003696
7.338	2.54029	73.428	0.018501
7.345	2.54791	73.498	0.046569
7.352	2.54302	73.569	0.074612
7.359	2.54296	73.639	0.102646
7.366	2.54682	73.71	0.13068
7.373	2.55102	73.78	0.158732
7.38	2.55431	73.85	0.1868
7.388	2.56631	73.921	0.214827
7.395	2.58481	73.991	0.242864
7.402	2.60448	74.062	0.270896
7.409	2.612	74.132	0.298932
7.416	2.60855	74.203	0.326981
7.423	2.59758	74.273	0.35504
7.43	2.58114	74.344	0.38309
7.437	2.55379	74.414	0.411113
7.444	2.5357	74.485	0.439156
7.451	2.52978	74.555	0.467213
7.458	2.53386	74.626	0.49526
7.465	2.54249	74.696	0.523304
7.472	2.54941	74.767	0.551352
7.479	2.55147	74.837	0.579369
7.486	2.54872	74.908	0.607405
7.493	2.53601	74.978	0.635463
7.5	2.52298	75.049	0.663515
7.507	2.51847	75.119	0.691551
7.514	2.52508	75.19	0.719581
7.521	2.53516	75.26	0.747625
7.528	2.54855	75.331	0.775686
7.536	2.55219	75.401	0.803733
7.543	2.54989	75.472	0.831761
7.55	2.53987	75.542	0.859796
7.557	2.53006	75.613	0.887854
7.564	2.5169	75.683	0.915919
7.571	2.50264	75.754	0.943944
7.578	2.48995	75.824	0.971987
7.585	2.48435	75.895	1.00002
7.592	2.48415	75.965	1.02805
7.599	2.48482	76.036	1.0561
7.606	2.48156	76.106	1.08416
7.613	2.46946	76.177	1.1122
7.62	2.45315	76.247	1.14024
7.627	2.43524	76.318	1.16827
7.634	2.42005	76.388	1.19632
7.641	2.4161	76.459	1.22438
7.648	2.42129	76.529	1.25241
7.655	2.42708	76.6	1.28044
7.662	2.43382	76.67	1.30849
7.669	2.44329	76.741	1.33656
7.676	2.44984	76.811	1.3646
7.684	2.45757	76.882	1.39263
7.691	2.46487	76.952	1.42067
7.698	2.46848	77.022	1.4487
7.705	2.47839	77.093	1.47674
7.712	2.49567	77.163	1.5048
7.719	2.51887	77.234	1.53285
7.726	2.54003	77.304	1.56088
7.733	2.56088	77.375	1.58892
7.74	2.58166	77.445	1.61697
7.747	2.5999	77.516	1.64502
7.754	2.61015	77.586	1.67306
7.761	2.60865	77.657	1.70107
7.768	2.6043	77.727	1.72913
7.775	2.59683	77.798	1.75718
7.782	2.5876	77.868	1.78524
7.789	2.57591	77.939	1.81328
7.796	2.56966	78.009	1.84131
7.803	2.56264	78.08	1.86935
7.81	2.5494	78.15	1.89742
7.817	2.53667	78.221	1.92545
7.824	2.52588	78.291	1.95349
7.832	2.51593	78.362	1.98153
7.839	2.50532	78.432	2.00956
7.846	2.49525	78.503	2.0376
7.853	2.49019	78.573	2.06567
7.86	2.49129	78.644	2.09371
7.867	2.49839	78.714	2.12174
7.874	2.49717	78.785	2.14977
7.881	2.4979	78.855	2.17782
7.888	2.5051	78.926	2.20588
7.895	2.51481	78.996	2.23392
7.902	2.51883	79.067	2.26195
7.909	2.53384	79.137	2.28999
7.916	2.54998	79.208	2.31804
7.923	2.56272	79.278	2.34609
7.93	2.56884	79.349	2.37413
7.937	2.57546	79.419	2.40217
7.944	2.58565	79.49	2.4302
7.951	2.59766	79.56	2.45826
7.958	2.60456	79.631	2.48631
7.965	2.60956	79.701	2.51435
7.972	2.61973	79.772	2.54238
7.98	2.63243	79.842	2.57042
7.987	2.63625	79.913	2.59848
7.994	2.63341	79.983	2.62653
8.001	2.63338	80.054	2.65456
8.008	2.63427	80.124	2.68259
8.015	2.62419	80.194	2.71064
8.022	2.6083	80.265	2.73871
8.029	2.59635	80.335	2.76674
8.036	2.59234	80.406	2.7948
8.043	2.59829	80.476	2.82282
8.05	2.59998	80.547	2.85087
8.057	2.59674	80.617	2.87893
8.064	2.59169	80.688	2.90696
8.071	2.58624	80.758	2.93499
8.078	2.57158	80.829	2.96303
8.085	2.56063	80.899	2.99107
8.092	2.56088	80.97	3.01912
8.099	2.57459	81.04	3.04717
8.106	2.58326	81.111	3.0752
8.113	2.58527	81.181	3.10324
8.12	2.58519	81.252	3.13129
8.128	2.59069	81.322	3.15934
8.135	2.59697	81.393	3.18738
8.142	2.59771	81.463	3.21542
8.149	2.59022	81.534	3.24346
8.156	2.58165	81.604	3.27151
8.163	2.57742	81.675	3.29956
8.17	2.57741	81.745	3.3276
8.177	2.58224	81.816	3.35563
8.184	2.5957	81.886	3.38367
8.191	2.60639	81.957	3.41172
8.198	2.60672	82.027	3.43978
8.205	2.60007	82.098	3.46781
8.212	2.60016	82.168	3.49584
8.219	2.60601	82.239	3.52389
8.226	2.62122	82.309	3.55194
8.233	2.64005	82.38	3.57999
8.24	2.65867	82.45	3.60802
8.247	2.66862	82.521	3.63605
8.254	2.679	82.591	3.6641
8.261	2.68709	82.662	3.69216
8.268	2.68756	82.732	3.7202
8.276	2.6836	82.803	3.74823
8.283	2.68167	82.873	3.77627
8.29	2.68229	82.944	3.80432
8.297	2.68666	83.014	3.83238
8.304	2.69154	83.085	3.86042
8.311	2.69206	83.155	3.88845
8.318	2.68651	83.226	3.91649
8.325	2.67689	83.296	3.94452
8.332	2.65908	83.366	3.97257
8.339	2.63931	83.437	4.00063
8.346	2.62141	83.507	4.02866
8.353	2.61031	83.578	4.05671
8.36	2.59471	83.648	4.08476
8.367	2.58447	83.719	4.1128
8.374	2.58282	83.789	4.14083
8.381	2.58532	83.86	4.16888
8.388	2.58421	83.93	4.19695
8.395	2.57886	84.001	4.22498
8.402	2.57193	84.071	4.25304
8.409	2.56662	84.142	4.28106
8.416	2.56741	84.212	4.30911
8.424	2.57144	84.283	4.33716
8.431	2.57413	84.353	4.36519
8.438	2.57167	84.424	4.39324
8.445	2.56907	84.494	4.42125
8.452	2.57211	84.565	4.44931
8.459	2.58017	84.635	4.47736
8.466	2.59237	84.706	4.5054
8.473	2.60929	84.776	4.53343
8.48	2.62149	84.847	4.56147
8.487	2.62952	84.917	4.58953
8.494	2.63466	84.988	4.61758
8.501	2.64486	85.058	4.64561
8.508	2.66288	85.129	4.67365
8.515	2.68012	85.199	4.7017
8.522	2.6894	85.27	4.72975
8.529	2.68837	85.34	4.75779
8.536	2.69119	85.411	4.78582
8.543	2.69715	85.481	4.81386
8.55	2.70227	85.552	4.84192
8.557	2.70079	85.622	4.86997
8.564	2.69599	85.693	4.89799
8.572	2.68915	85.763	4.92602
8.579	2.67837	85.834	4.95408
8.586	2.66618	85.904	4.98214
8.593	2.65673	85.975	5.01018
8.6	2.65013	86.045	5.03821
8.607	2.64448	86.116	5.06625
8.614	2.62911	86.186	5.0943
8.621	2.6265	86.257	5.12236
8.628	2.63083	86.327	5.15041
8.635	2.64129	86.398	5.17843
8.642	2.63859	86.468	5.20648
8.649	2.6346	86.538	5.23453
8.656	2.62912	86.609	5.26257
8.663	2.62236	86.679	5.2906
8.67	2.61731	86.75	5.31864
8.677	2.61879	86.82	5.34669
8.684	2.62284	86.891	5.37474
8.691	2.62842	86.961	5.40277
8.698	2.63603	87.032	5.43081
8.705	2.64221	87.102	5.45886
8.712	2.64529	87.173	5.48691
8.72	2.64594	87.243	5.51496
8.727	2.63153	87.314	5.54298
8.734	2.62085	87.384	5.57102
8.741	2.61773	87.455	5.59908
8.748	2.62394	87.525	5.62713
8.755	2.62584	87.596	5.65516
8.762	2.63019	87.666	5.68319
8.769	2.64586	87.737	5.71125
8.776	2.66665	87.807	5.7393
8.783	2.68086	87.878	5.76735
8.79	2.69186	87.948	5.79538
8.797	2.70127	88.019	5.82341
8.804	2.70871	88.089	5.85147
8.811	2.7154	88.16	5.87951
8.818	2.7255	88.23	5.90754
8.825	2.74368	88.301	5.93558
8.832	2.76368	88.371	5.96363
8.839	2.77808	88.442	5.99168
8.846	2.78291	88.512	6.01972
8.853	2.79049	88.583	6.04775
8.86	2.80878	88.653	6.07578
8.868	2.83577	88.724	6.10384
8.875	2.84948	88.794	6.1319
8.882	2.85232	88.865	6.15994
8.889	2.8518	88.935	6.18798
8.896	2.8543	89.006	6.21605
8.903	2.86256	89.076	6.24408
8.91	2.8725	89.147	6.2721
8.917	2.8823	89.217	6.30014
8.924	2.8903	89.288	6.32819
8.931	2.8902	89.358	6.35624
8.938	2.87895	89.429	6.38429
8.945	2.86715	89.499	6.41229
8.952	2.86413	89.57	6.44035
8.959	2.86162	89.64	6.46841
8.966	2.84789	89.71	6.49645
8.973	2.83257	89.781	6.52449
8.98	2.82275	89.851	6.55254
8.987	2.82208	89.922	6.58061
8.994	2.82307	89.992	6.60864
9.001	2.82168	90.063	6.63666
9.008	2.81377	90.133	6.6647
9.016	2.80082	90.204	6.69275
9.023	2.78894	90.274	6.7208
9.03	2.77888	90.345	6.74882
9.037	2.77117	90.415	6.77687
9.044	2.77447	90.486	6.80491
9.051	2.77236	90.556	6.83297
9.058	2.76831	90.627	6.86103
9.065	2.76684	90.697	6.88907
9.072	2.77531	90.768	6.9171
9.079	2.77705	90.838	6.94516
9.086	2.77591	90.909	6.9732
9.093	2.77459	90.979	7.00122
9.1	2.77377	91.05	7.02926
9.107	2.77447	91.12	7.05731
9.114	2.77861	91.191	7.08536
9.121	2.7826	91.261	7.1134
9.128	2.77836	91.332	7.14144
9.135	2.77274	91.402	7.1695
9.142	2.76564	91.473	7.19754
9.149	2.75924	91.543	7.22558
9.156	2.76005	91.614	7.25361
9.164	2.77297	91.684	7.28164
9.171	2.7804	91.755	7.3097
9.178	2.77928	91.825	7.33773
9.185	2.77612	91.896	7.36577
9.192	2.77359	91.966	7.39382
9.199	2.77964	92.037	7.42187
9.206	2.78971	92.107	7.44993
9.213	2.79528	92.178	7.47798
9.22	2.78657	92.248	7.50599
9.227	2.78097	92.319	7.53405
9.234	2.79058	92.389	7.5621
9.241	2.81893	92.46	7.59013
9.248	2.8479	92.53	7.61815
9.255	2.85301	92.601	7.64619
9.262	2.84709	92.671	7.67427
9.269	2.83216	92.742	7.7023
9.276	2.83121	92.812	7.73033
9.283	2.83222	92.882	7.7584
9.29	2.83742	92.953	7.78644
9.297	2.84658	93.023	7.81447
9.304	2.84501	93.094	7.84251
9.312	2.85021	93.164	7.87055
9.319	2.86343	93.235	7.89858
9.326	2.89009	93.305	7.92664
9.333	2.91504	93.376	7.95468
9.34	2.92364	93.446	7.98274
9.347	2.90917	93.517	8.0108
9.354	2.8882	93.587	8.03882
9.361	2.89103	93.658	8.06685
9.368	2.89974	93.728	8.09489
9.375	2.90508	93.799	8.12294
9.382	2.90271	93.869	8.15098
9.389	2.91003	93.94	8.17902
9.396	2.91292	94.01	8.20707
9.403	2.91164	94.081	8.23514
9.41	2.9076	94.151	8.26317
9.417	2.89404	94.222	8.2912
9.424	2.88219	94.292	8.31924
9.431	2.87209	94.363	8.34729
9.438	2.85886	94.433	8.37534
9.445	2.83645	94.504	8.40338
9.452	2.82762	94.574	8.43138
9.46	2.83063	94.645	8.45948
9.467	2.83687	94.715	8.48752
9.474	2.84265	94.786	8.51555
9.481	2.84958	94.856	8.54358
9.488	2.85075	94.927	8.57162
9.495	2.84753	94.997	8.59968
9.502	2.84901	95.068	8.62773
9.509	2.85297	95.138	8.65575
9.516	2.85668	95.209	8.68381
9.523	2.85945	95.279	8.71186
9.53	2.86056	95.35	8.73989
9.537	2.86658	95.42	8.76792
9.544	2.88213	95.491	8.79597
9.551	2.89629	95.561	8.82402
9.558	2.89825	95.632	8.85208
9.565	2.89455	95.702	8.88011
9.572	2.8938	95.773	8.90814
9.579	2.89417	95.843	8.9362
9.586	2.8938	95.914	8.96424
9.593	2.89579	95.984	8.99227
9.6	2.89371	96.054	9.02032
9.608	2.89324	96.125	9.04837
9.615	2.89737	96.195	9.07641
9.622	2.90252	96.266	9.10445
9.629	2.9005	96.336	9.13249
9.636	2.89491	96.407	9.16053
9.643	2.8833	96.477	9.18858
9.65	2.86948	96.548	9.21662
9.657	2.86842	96.618	9.24468
9.664	2.86958	96.689	9.27273
9.671	2.86507	96.759	9.30076
9.678	2.85643	96.83	9.32879
9.685	2.85328	96.9	9.35683
9.692	2.85046	96.971	9.38487
9.699	2.84545	97.041	9.41293
9.706	2.83967	97.112	9.44098
9.713	2.82711	97.182	9.46901
9.72	2.8093	97.253	9.49706
9.727	2.79108	97.323	9.52511
9.734	2.78239	97.394	9.55313
9.741	2.77577	97.464	9.58119
9.748	2.77076	97.535	9.60924
9.756	2.76903	97.605	9.63727
9.763	2.76887	97.676	9.6653
9.77	2.77494	97.746	9.69334
9.777	2.78008	97.817	9.72139
9.784	2.7824	97.887	9.74944
9.791	2.78034	97.958	9.77748
9.798	2.78123	98.028	9.80551
9.805	2.78274	98.099	9.83356
9.812	2.79299	98.169	9.86162
9.819	2.80877	98.24	9.88965
9.826	2.82742	98.31	9.91769
9.833	2.83351	98.381	9.94574
9.84	2.836	98.451	9.97378
9.847	2.83573	98.522	10.0018
9.854	2.83351	98.592	10.0299
9.861	2.82932	98.663	10.0579
9.868	2.82527	98.733	10.086
9.875	2.8229	98.804	10.114
9.882	2.82498	98.874	10.142
9.889	2.83673	98.945	10.1701
9.896	2.84819	99.015	10.1981
9.904	2.85866	99.086	10.2262
9.911	2.87715	99.156	10.2542
9.918	2.88566	99.226	10.2822
9.925	2.89104	99.297	10.3103
9.932	2.89714	99.367	10.3383
9.939	2.91746	99.438	10.3664
9.946	2.93616	99.508	10.3944
9.953	2.9558	99.579	10.4225
9.96	2.97569	99.649	10.4505
9.967	2.99057	99.72	10.4786
9.974	3.00389	99.79	10.5066
9.981	3.01549	99.861	10.5346
9.988	3.02327	99.931	10.5627
9.995	3.02215	100.002	10.5907
10.002	3.01806	100.072	10.6188
10.009	3.01045	100.143	10.6468
10.016	2.99783	100.213	10.6748
10.023	2.98981	100.284	10.7029
10.03	2.98285	100.354	10.731
10.037	2.97185	100.425	10.759
10.044	2.95889	100.495	10.787
10.052	2.94778	100.566	10.8151
10.059	2.93908	100.636	10.8431
10.066	2.93308	100.707	10.8712
10.073	2.93208	100.777	10.8992
10.08	2.93238	100.848	10.9273
10.087	2.93448	100.918	10.9553
10.094	2.93424	100.989	10.9833
10.101	2.93294	101.059	11.0114
10.108	2.93254	101.13	11.0394
10.115	2.92814	101.2	11.0674
10.122	2.91947	101.271	11.0955
10.129	2.91425	101.341	11.1235
10.136	2.91817	101.412	11.1516
10.143	2.92745	101.482	11.1797
10.15	2.93944	101.553	11.2077
10.157	2.95116	101.623	11.2357
10.164	2.96122	101.694	11.2637
10.171	2.97292	101.764	11.2918
10.178	2.9834	101.835	11.3198
10.185	2.99353	101.905	11.3479
10.192	3.00416	101.976	11.3759
10.2	3.01695	102.046	11.404
10.207	3.02339	102.117	11.432
10.214	3.0305	102.187	11.4601
10.221	3.03551	102.258	11.4881
10.228	3.03312	102.328	11.5161
10.235	3.02096	102.398	11.5442
10.242	3.0146	102.469	11.5722
10.249	3.01008	102.539	11.6003
10.256	3.00391	102.61	11.6283
10.263	2.99764	102.68	11.6564
10.27	2.99039	102.751	11.6844
10.277	2.98427	102.821	11.7125
10.284	2.97981	102.892	11.7405
10.291	2.97456	102.962	11.7685
10.298	2.96784	103.033	11.7966
10.305	2.9637	103.103	11.8246
10.312	2.96639	103.174	11.8527
10.319	2.97155	103.244	11.8807
10.326	2.98477	103.315	11.9088
10.333	2.99897	103.385	11.9368
10.34	3.00915	103.456	11.9648
10.348	3.0084	103.526	11.9929
10.355	3.01296	103.597	12.0209
10.362	3.01783	103.667	12.049
10.369	3.02084	103.738	12.077
10.376	3.02117	103.808	12.1051
10.383	3.01825	103.879	12.1331
10.39	3.01517	103.949	12.1611
10.397	3.01264	104.02	12.1892
10.404	3.01193	104.09	12.2172
10.411	3.01251	104.161	12.2453
10.418	3.01212	104.231	12.2733
10.425	3.0077	104.302	12.3014
10.432	3.00074	104.372	12.3294
10.439	2.99814	104.443	12.3575
10.446	3.00914	104.513	12.3855
10.453	3.02027	104.584	12.4135
10.46	3.0264	104.654	12.4416
10.467	3.0327	104.725	12.4696
10.474	3.04183	104.795	12.4977
10.481	3.05126	104.866	12.5257
10.488	3.06002	104.936	12.5537
10.496	3.06779	105.007	12.5818
10.503	3.07441	105.077	12.6098
10.51	3.08024	105.148	12.6379
10.517	3.0822	105.218	12.6659
10.524	3.07763	105.289	12.694
10.531	3.07666	105.359	12.722
10.538	3.07935	105.43	12.75
10.545	3.08081	105.5	12.7781
10.552	3.07118	105.57	12.8062
10.559	3.06151	105.641	12.8341
10.566	3.05173	105.711	12.8622
10.573	3.04189	105.782	12.8902
10.58	3.03225	105.852	12.9183
10.587	3.02431	105.923	12.9464
10.594	3.02471	105.993	12.9744
10.601	3.03077	106.064	13.0024
10.608	3.03537	106.134	13.0305
10.615	3.02588	106.205	13.0585
10.622	3.01808	106.275	13.0865
10.629	3.01597	106.346	13.1146
10.636	3.01627	106.416	13.1426
10.644	3.01486	106.487	13.1707
10.651	3.01707	106.557	13.1987
10.658	3.02149	106.628	13.2268
10.665	3.02524	106.698	13.2548
10.672	3.02129	106.769	13.2829
10.679	3.01721	106.839	13.3109
10.686	3.01473	106.91	13.339
10.693	3.01586	106.98	13.367
10.7	3.00586	107.051	13.395
10.707	2.99562	107.121	13.4231
10.714	2.99178	107.192	13.4511
10.721	3.003	107.262	13.4792
10.728	3.00679	107.333	13.5072
10.735	3.00615	107.403	13.5352
10.742	3.00633	107.474	13.5633
10.749	3.01444	107.544	13.5913
10.756	3.01913	107.615	13.6194
10.763	3.01719	107.685	13.6474
10.77	3.01054	107.756	13.6755
10.777	3.00972	107.826	13.7035
10.784	3.00574	107.897	13.7316
10.792	2.99705	107.967	13.7596
10.799	2.98673	108.038	13.7876
10.806	2.98312	108.108	13.8157
10.813	2.97739	108.179	13.8437
10.82	2.97388	108.249	13.8718
10.827	2.97563	108.32	13.8998
10.834	2.98792	108.39	13.9278
10.841	2.99482	108.461	13.9559
10.848	2.99431	108.531	13.9839
10.855	2.98768	108.602	14.012
10.862	2.99477	108.672	14.04
10.869	3.01192	108.743	14.0681
10.876	3.03194	108.813	14.0961
10.883	3.04903	108.883	14.1241
10.89	3.0694	108.954	14.1522
10.897	3.09006	109.024	14.1802
10.904	3.10786	109.095	14.2083
10.911	3.12021	109.165	14.2363
10.918	3.13391	109.236	14.2644
10.925	3.14243	109.306	14.2924
10.932	3.14231	109.377	14.3204
10.94	3.13112	109.447	14.3485
10.947	3.12704	109.518	14.3765
10.954	3.12876	109.588	14.4046
10.961	3.12956	109.659	14.4326
10.968	3.1161	109.729	14.4607
10.975	3.10061	109.8	14.4887
10.982	3.08688	109.87	14.5168
10.989	3.07595	109.941	14.5448
10.996	3.06489	110.011	14.5728
11.003	3.0555	110.082	14.6009
11.01	3.05519	110.152	14.6289
11.017	3.05834	110.223	14.657
11.024	3.05958	110.293	14.685
11.031	3.05848	110.364	14.713
11.038	3.06609	110.434	14.7411
11.045	3.07704	110.505	14.7691
11.052	3.08035	110.575	14.7972
11.059	3.07786	110.646	14.8252
11.066	3.07796	110.716	14.8533
11.073	3.0801	110.787	14.8813
11.08	3.08475	110.857	14.9093
11.088	3.09306	110.928	14.9374
11.095	3.10178	110.998	14.9655
11.102	3.1069	111.069	14.9935
11.109	3.106	111.139	15.0215
11.116	3.09512	111.21	15.0496
11.123	3.08308	111.28	15.0776
11.13	3.07239	111.351	15.1056
11.137	3.06469	111.421	15.1337
11.144	3.06156	111.492	15.1618
11.151	3.06534	111.562	15.1898
11.158	3.07397	111.633	15.2178
11.165	3.08223	111.703	15.2459
11.172	3.0864	111.774	15.2739
11.179	3.1054	111.844	15.3019
11.186	3.12546	111.914	15.33
11.193	3.14194	111.985	15.3581
11.2	3.15455	112.055	15.386
11.207	3.17255	112.126	15.4141
11.214	3.18935	112.196	15.4422
11.221	3.20196	112.267	15.4702
11.228	3.2143	112.337	15.4983
11.236	3.23118	112.408	15.5263
11.243	3.24739	112.478	15.5543
11.25	3.25721	112.549	15.5824
11.257	3.25979	112.619	15.6104
11.264	3.26234	112.69	15.6385
11.271	3.26617	112.76	15.6665
11.278	3.26822	112.831	15.6946
11.285	3.25626	112.901	15.7226
11.292	3.25522	112.972	15.7506
11.299	3.25598	113.042	15.7787
11.306	3.25767	113.113	15.8067
11.313	3.25559	113.183	15.8348
11.32	3.25919	113.254	15.8628
11.327	3.26449	113.324	15.8909
11.334	3.26826	113.395	15.9189
11.341	3.26657	113.465	15.9469
11.348	3.26283	113.536	15.975
11.355	3.26396	113.606	16.003
11.362	3.27261	113.677	16.0311
11.369	3.2844	113.747	16.0591
11.376	3.29476	113.818	16.0872
11.384	3.3108	113.888	16.1152
11.391	3.32504	113.959	16.1432
11.398	3.32717	114.029	16.1713
11.405	3.31226	114.1	16.1993
11.412	3.30087	114.17	16.2274
11.419	3.29904	114.241	16.2554
11.426	3.30365	114.311	16.2835
11.433	3.30801	114.382	16.3115
11.44	3.30454	114.452	16.3395
11.447	3.2995	114.523	16.3676
11.454	3.299	114.593	16.3956
11.461	3.30678	114.664	16.4237
11.468	3.31158	114.734	16.4517
11.475	3.31188	114.805	16.4798
11.482	3.30921	114.875	16.5078
11.489	3.30085	114.946	16.5358
11.496	3.29931	115.016	16.5639
11.503	3.3051	115.087	16.5919
11.51	3.32221	115.157	16.62
11.517	3.33583	115.227	16.648
11.524	3.33929	115.298	16.6761
11.532	3.34054	115.368	16.7041
11.539	3.34436	115.439	16.7321
11.546	3.35743	115.509	16.7602
11.553	3.37279	115.58	16.7883
11.56	3.38327	115.65	16.8163
11.567	3.38756	115.721	16.8443
11.574	3.39317	115.791	16.8724
11.581	3.40166	115.862	16.9004
11.588	3.40748	115.932	16.9285
11.595	3.40885	116.003	16.9565
11.602	3.4042	116.073	16.9845
11.609	3.4036	116.144	17.0126
11.616	3.40605	116.214	17.0406
11.623	3.40508	116.285	17.0687
11.63	3.3885	116.355	17.0967
11.637	3.37034	116.426	17.1248
11.644	3.36237	116.496	17.1528
11.651	3.3589	116.567	17.1808
11.658	3.35501	116.637	17.2089
11.665	3.36065	116.708	17.2369
11.672	3.36739	116.778	17.265
11.68	3.3749	116.849	17.293
11.687	3.38553	116.919	17.321
11.694	3.40059	116.99	17.3491
11.701	3.41361	117.06	17.3771
11.708	3.42405	117.131	17.4052
11.715	3.42774	117.201	17.4332
11.722	3.41395	117.272	17.4613
11.729	3.41076	117.342	17.4893
11.736	3.41954	117.413	17.5174
11.743	3.42957	117.483	17.5454
11.75	3.42579	117.554	17.5735
11.757	3.42602	117.624	17.6015
11.764	3.42531	117.695	17.6295
11.771	3.41518	117.765	17.6576
11.778	3.41238	117.836	17.6856
11.785	3.40834	117.906	17.7137
11.792	3.39834	117.977	17.7417
11.799	3.38332	118.047	17.7697
11.806	3.37175	118.118	17.7978
11.813	3.35862	118.188	17.8258
11.82	3.35218	118.258	17.8539
11.828	3.35786	118.329	17.8819
11.835	3.36117	118.399	17.9099
11.842	3.36275	118.47	17.938
11.849	3.37123	118.54	17.966
11.856	3.38761	118.611	17.9941
11.863	3.39708	118.681	18.0221
11.87	3.39372	118.752	18.0502
11.877	3.38543	118.822	18.0782
11.884	3.3708	118.893	18.1062
11.891	3.35982	118.963	18.1343
11.898	3.35534	119.034	18.1623
11.905	3.35962	119.104	18.1904
11.912	3.36932	119.175	18.2184
11.919	3.38134	119.245	18.2465
11.926	3.3919	119.316	18.2745
11.933	3.40302	119.386	18.3026
11.94	3.41566	119.457	18.3306
11.947	3.42695	119.527	18.3586
11.954	3.42711	119.598	18.3867
11.961	3.41246	119.668	18.4147
11.968	3.39125	119.739	18.4428
11.976	3.38499	119.809	18.4708
11.983	3.37408	119.88	18.4989
11.99	3.35994	119.95	18.5269
11.997	3.34338	120.021	18.5549
12.004	3.33167	120.091	18.583
12.011	3.31319	120.162	18.611
12.018	3.29905	120.232	18.6391
12.025	3.29457	120.303	18.6671
12.032	3.29225	120.373	18.6952
12.039	3.29319	120.444	18.7232
12.046	3.29639	120.514	18.7512
12.053	3.30014	120.585	18.7793
12.06	3.30197	120.655	18.8073
12.067	3.31639	120.726	18.8354
12.074	3.33614	120.796	18.8634
12.081	3.3595	120.867	18.8914
12.088	3.38766	120.937	18.9195
12.095	3.4175	121.008	18.9476
12.102	3.44649	121.078	18.9756
12.109	3.47101	121.149	19.0036
12.116	3.49535	121.219	19.0317
12.124	3.50904	121.29	19.0597
12.131	3.50876	121.36	19.0877
12.138	3.50074	121.43	19.1158
12.145	3.49005	121.501	19.1439
12.152	3.48447	121.571	19.1719
12.159	3.48134	121.642	19.1999
12.166	3.48175	121.712	19.228
12.173	3.48515	121.783	19.256
12.18	3.48607	121.853	19.2841
12.187	3.47347	121.924	19.3121
12.194	3.45505	121.994	19.3402
12.201	3.43781	122.065	19.3682
12.208	3.44158	122.135	19.3962
12.215	3.44653	122.206	19.4243
12.222	3.44806	122.276	19.4523
12.229	3.44085	122.347	19.4804
12.236	3.44562	122.417	19.5084
12.243	3.46307	122.488	19.5364
12.25	3.48298	122.558	19.5645
12.257	3.49381	122.629	19.5925
12.264	3.48886	122.699	19.6206
12.272	3.47887	122.77	19.6486
12.279	3.46971	122.84	19.6767
12.286	3.46665	122.911	19.7047
12.293	3.4762	122.981	19.7327
12.3	3.48746	123.052	19.7608
12.307	3.49112	123.122	19.7888
12.314	3.4768	123.193	19.8169
12.321	3.46786	123.263	19.8449
12.328	3.46567	123.334	19.8729
12.335	3.46755	123.404	19.901
12.342	3.46346	123.475	19.9291
12.349	3.44815	123.545	19.9571
12.356	3.42932	123.616	19.9851
12.363	3.41558	123.686	20.0132
12.37	3.41727	123.757	20.0412
12.377	3.42472	123.827	20.0693
12.384	3.42869	123.898	20.0973
12.391	3.42535	123.968	20.1254
12.398	3.41754	124.039	20.1534
12.405	3.41109	124.109	20.1814
12.412	3.40622	124.18	20.2095
12.42	3.40063	124.25	20.2375
12.427	3.39028	124.321	20.2656
12.434	3.37677	124.391	20.2936
12.441	3.36691	124.462	20.3216
12.448	3.36662	124.532	20.3497
12.455	3.37238	124.603	20.3777
12.462	3.38064	124.673	20.4058
12.469	3.38578	124.743	20.4338
12.476	3.38734	124.814	20.4619
12.483	3.38287	124.884	20.4899
12.49	3.37117	124.955	20.518
12.497	3.3635	125.025	20.546
12.504	3.36815	125.096	20.574
12.511	3.38901	125.166	20.6021
12.518	3.40882	125.237	20.6301
12.525	3.4168	125.307	20.6582
12.532	3.41801	125.378	20.6862
12.539	3.42204	125.448	20.7142
12.546	3.43389	125.519	20.7423
12.553	3.43767	125.589	20.7703
12.56	3.43978	125.66	20.7984
12.568	3.44586	125.73	20.8264
12.575	3.45636	125.801	20.8545
12.582	3.46121	125.871	20.8825
12.589	3.46572	125.942	20.9105
12.596	3.48136	126.012	20.9386
12.603	3.50911	126.083	20.9667
12.61	3.5238	126.153	20.9947
12.617	3.51653	126.224	21.0227
12.624	3.49753	126.294	21.0508
12.631	3.49205	126.365	21.0788
12.638	3.49261	126.435	21.1069
12.645	3.49163	126.506	21.1349
12.652	3.48428	126.576	21.1629
12.659	3.47504	126.647	21.191
12.666	3.46238	126.717	21.219
12.673	3.44765	126.788	21.2471
12.68	3.43462	126.858	21.2751
12.687	3.42943	126.929	21.3031
12.694	3.43235	126.999	21.3312
12.701	3.43344	127.07	21.3592
12.708	3.42186	127.14	21.3873
12.716	3.40575	127.211	21.4153
12.723	3.40473	127.281	21.4434
12.73	3.4155	127.352	21.4714
12.737	3.43029	127.422	21.4994
12.744	3.44329	127.493	21.5275
12.751	3.45385	127.563	21.5556
12.758	3.46436	127.634	21.5836
12.765	3.47602	127.704	21.6116
12.772	3.48635	127.774	21.6397
12.779	3.49557	127.845	21.6677
12.786	3.51559	127.915	21.6958
12.793	3.54518	127.986	21.7238
12.8	3.56439	128.056	21.7519
12.807	3.56521	128.127	21.7799
12.814	3.5648	128.197	21.8079
12.821	3.57273	128.268	21.836
12.828	3.59639	128.338	21.864
12.835	3.61586	128.409	21.8921
12.842	3.62372	128.479	21.9201
12.849	3.62363	128.55	21.9481
12.856	3.62489	128.62	21.9762
12.864	3.62267	128.691	22.0043
12.871	3.62043	128.761	22.0323
12.878	3.62641	128.832	22.0603
12.885	3.64698	128.902	22.0884
12.892	3.65112	128.973	22.1164
12.899	3.63332	129.043	22.1445
12.906	3.61132	129.114	22.1725
12.913	3.60926	129.184	22.2005
12.92	3.61255	129.255	22.2286
12.927	3.60895	129.325	22.2566
12.934	3.59109	129.396	22.2846
12.941	3.57281	129.466	22.3127
12.948	3.56686	129.537	22.3407
12.955	3.55567	129.607	22.3688
12.962	3.54269	129.678	22.3968
12.969	3.53434	129.748	22.4249
12.976	3.52958	129.819	22.4529
12.983	3.51292	129.889	22.481
12.99	3.48886	129.96	22.509
12.997	3.46832	130.03	22.537
13.004	3.46771	130.101	22.5651
13.012	3.46818	130.171	22.5931
13.019	3.46599	130.242	22.6212
13.026	3.45846	130.312	22.6492
13.033	3.44993	130.383	22.6773
13.04	3.44201	130.453	22.7053
13.047	3.43369	130.524	22.7333
13.054	3.42753	130.594	22.7614
13.061	3.43122	130.665	22.7894
13.068	3.43821	130.735	22.8175
13.075	3.4435	130.806	22.8455
13.082	3.44955	130.876	22.8736
13.089	3.46084	130.947	22.9016
13.096	3.46865	131.017	22.9296
13.103	3.47774	131.087	22.9577
13.11	3.48815	131.158	22.9858
13.117	3.50195	131.228	23.0138
13.124	3.52546	131.299	23.0418
13.131	3.55062	131.369	23.0699
13.138	3.57149	131.44	23.0979
13.145	3.58629	131.51	23.1259
13.152	3.602	131.581	23.154
13.16	3.6196	131.651	23.182
13.167	3.63763	131.722	23.2101
13.174	3.6555	131.792	23.2381
13.181	3.67986	131.863	23.2662
13.188	3.70048	131.933	23.2942
13.195	3.71621	132.004	23.3222
13.202	3.72912	132.074	23.3503
13.209	3.73916	132.145	23.3783
13.216	3.74575	132.215	23.4063
13.223	3.7475	132.286	23.4344
13.23	3.74089	132.356	23.4625
13.237	3.7453	132.427	23.4905
13.244	3.75748	132.497	23.5186
13.251	3.77082	132.568	23.5466
13.258	3.77947	132.638	23.5746
13.265	3.7858	132.709	23.6027
13.272	3.78952	132.779	23.6307
13.279	3.78915	132.85	23.6588
13.286	3.78185	132.92	23.6868
13.293	3.76812	132.991	23.7148
13.3	3.75488	133.061	23.7429
13.308	3.74286	133.132	23.7709
13.315	3.72993	133.202	23.799
13.322	3.7199	133.273	23.827
13.329	3.71104	133.343	23.8551
13.336	3.70075	133.414	23.8831
13.343	3.68119	133.484	23.9112
13.35	3.65931	133.555	23.9392
13.357	3.64128	133.625	23.9672
13.364	3.62809	133.696	23.9953
13.371	3.61983	133.766	24.0233
13.378	3.61448	133.837	24.0514
13.385	3.61331	133.907	24.0794
13.392	3.6168	133.978	24.1074
13.399	3.62552	134.048	24.1355
13.406	3.62044	134.118	24.1635
13.413	3.61204	134.189	24.1916
13.42	3.60358	134.259	24.2196
13.427	3.59272	134.33	24.2477
13.434	3.58076	134.4	24.2757
13.441	3.58082	134.471	24.3037
13.448	3.58825	134.541	24.3318
13.456	3.59747	134.612	24.3599
13.463	3.60277	134.682	24.3879
13.47	3.60409	134.753	24.4159
13.477	3.60321	134.823	24.444
13.484	3.60443	134.894	24.472
13.491	3.60033	134.964	24.5001
13.498	3.60283	135.035	24.5281
13.505	3.61047	135.105	24.5561
13.512	3.6331	135.176	24.5842
13.519	3.6473	135.246	24.6122
13.526	3.66159	135.317	24.6403
13.533	3.67982	135.387	24.6683
13.54	3.69991	135.458	24.6964
13.547	3.70648	135.528	24.7244
13.554	3.69901	135.599	24.7524
13.561	3.68771	135.669	24.7805
13.568	3.68147	135.74	24.8086
13.575	3.69328	135.81	24.8366
13.582	3.70546	135.881	24.8646
13.589	3.71419	135.951	24.8926
13.596	3.71969	136.022	24.9207
13.604	3.71469	136.092	24.9488
13.611	3.70997	136.163	24.9768
13.618	3.70849	136.233	25.0048
13.625	3.71511	136.304	25.0329
13.632	3.71494	136.374	25.0609
13.639	3.71035	136.445	25.089
13.646	3.70549	136.515	25.117
13.653	3.70474	136.586	25.145
13.66	3.71424	136.656	25.1731
13.667	3.7235	136.727	25.2012
13.674	3.72616	136.797	25.2292
13.681	3.71371	136.868	25.2572
13.688	3.69833	136.938	25.2853
13.695	3.68618	137.009	25.3133
13.702	3.67991	137.079	25.3413
13.709	3.67692	137.15	25.3694
13.716	3.67308	137.22	25.3975
13.723	3.67069	137.29	25.4255
13.73	3.6712	137.361	25.4535
13.737	3.68045	137.431	25.4815
13.744	3.69316	137.502	25.5096
13.752	3.70224	137.572	25.5376
13.759	3.70017	137.643	25.5657
13.766	3.69429	137.713	25.5938
13.773	3.69408	137.784	25.6218
13.78	3.71261	137.854	25.6498
13.787	3.73288	137.925	25.6778
13.794	3.7536	137.995	25.7059
13.801	3.77338	138.066	25.734
13.808	3.78769	138.136	25.762
13.815	3.79825	138.207	25.7901
13.822	3.80782	138.277	25.8181
13.829	3.81685	138.348	25.8461
13.836	3.83177	138.418	25.8742
13.843	3.8443	138.489	25.9022
13.85	3.85268	138.559	25.9303
13.857	3.86084	138.63	25.9583
13.864	3.87861	138.7	25.9863
13.871	3.88991	138.771	26.0144
13.878	3.89132	138.841	26.0424
13.885	3.88034	138.912	26.0705
13.892	3.87758	138.982	26.0985
13.9	3.87606	139.053	26.1266
13.907	3.8648	139.123	26.1546
13.914	3.84614	139.194	26.1826
13.921	3.83083	139.264	26.2107
13.928	3.82349	139.335	26.2387
13.935	3.81527	139.405	26.2668
13.942	3.80264	139.476	26.2948
13.949	3.79237	139.546	26.3228
13.956	3.78446	139.617	26.3509
13.963	3.76926	139.687	26.3789
13.97	3.74996	139.758	26.407
13.977	3.73966	139.828	26.435
13.984	3.73113	139.899	26.4631
13.991	3.7184	139.969	26.4911
13.998	3.70467	140.04	26.5191
14.005	3.70178	140.11	26.5472
14.012	3.71238	140.181	26.5752
14.019	3.72277	140.251	26.6033
14.026	3.72881	140.322	26.6313
14.033	3.72657	140.392	26.6594
14.04	3.71688	140.462	26.6874
14.048	3.70437	140.533	26.7155
14.055	3.69569	140.603	26.7435
14.062	3.69646	140.674	26.7715
14.069	3.70905	140.744	26.7996
14.076	3.73264	140.815	26.8276
14.083	3.76131	140.885	26.8557
[truncated: 33,859 more rows]

## Sheet: SEC
Volume (mL)	Abs 280 nm (mAU)
0	0.321195
0.001	0.327964
0.002	0.334775
0.002	0.341632
0.003	0.348488
0.004	0.35436
0.004	0.359875
0.005	0.36534
0.005	0.370802
0.006	0.376313
0.007	0.382114
0.007	0.388305
0.008	0.394576
0.009	0.400809
0.009	0.405026
0.01	0.402843
0.01	0.399409
0.011	0.395959
0.012	0.392524
0.012	0.389806
0.013	0.38795
0.014	0.386217
0.014	0.384486
0.015	0.38263
0.015	0.380245
0.016	0.378087
0.017	0.375987
0.017	0.373899
0.018	0.371756
0.019	0.369877
0.019	0.368018
0.02	0.366158
0.02	0.364437
0.021	0.363365
0.022	0.362725
0.022	0.362115
0.023	0.361508
0.024	0.360859
0.024	0.360965
0.025	0.361218
0.025	0.361476
0.026	0.361858
0.027	0.361949
0.027	0.361296
0.028	0.360644
0.029	0.36003
0.029	0.358625
0.03	0.357703
0.03	0.357319
0.031	0.356989
0.032	0.356921
0.032	0.357377
0.033	0.357992
0.034	0.358562
0.034	0.359134
0.035	0.359627
0.035	0.359878
0.036	0.359986
0.037	0.360081
0.037	0.360542
0.038	0.36134
0.039	0.361962
0.039	0.362443
0.04	0.362933
0.04	0.363499
0.041	0.364941
0.042	0.366945
0.042	0.369004
0.043	0.371386
0.044	0.373711
0.044	0.375354
0.045	0.376694
0.045	0.377906
0.046	0.378052
0.047	0.37834
0.047	0.379051
0.048	0.379768
0.049	0.381855
0.049	0.385691
0.05	0.390152
0.05	0.394627
0.051	0.399095
0.052	0.403865
0.052	0.408587
0.053	0.413262
0.054	0.417936
0.054	0.42195
0.055	0.42505
0.055	0.427813
0.056	0.430561
0.057	0.433305
0.057	0.435991
0.058	0.438517
0.059	0.440971
0.059	0.443425
0.06	0.445218
0.06	0.447126
0.061	0.449299
0.062	0.451448
0.062	0.4537
0.063	0.45613
0.064	0.458177
0.064	0.460016
0.065	0.461841
0.065	0.463586
0.066	0.465351
0.067	0.467143
0.067	0.468931
0.068	0.470724
0.069	0.472121
0.069	0.472935
0.07	0.473545
0.07	0.47415
0.071	0.473913
0.072	0.472788
0.072	0.471447
0.073	0.470103
0.074	0.468982
0.074	0.468198
0.075	0.467209
0.075	0.466057
0.076	0.464907
0.077	0.464054
0.077	0.464664
0.078	0.465944
0.079	0.467229
0.079	0.468452
0.08	0.46771
0.08	0.465014
0.081	0.461872
0.082	0.458857
0.082	0.455688
0.083	0.451907
0.084	0.447733
0.084	0.443546
0.085	0.439309
0.085	0.435252
0.086	0.431923
0.087	0.429031
0.087	0.426135
0.088	0.423355
0.089	0.420744
0.089	0.418191
0.09	0.415631
0.09	0.413073
0.091	0.410914
0.092	0.409292
0.092	0.407845
0.093	0.406396
0.094	0.404856
0.094	0.402876
0.095	0.400627
0.095	0.39837
0.096	0.396123
0.097	0.394317
0.097	0.392833
0.098	0.391369
0.099	0.389895
0.099	0.388477
0.1	0.387145
0.1	0.385837
0.101	0.384529
0.102	0.383091
0.102	0.381858
0.103	0.381138
0.104	0.380622
0.104	0.380105
0.105	0.379402
0.105	0.378092
0.106	0.376495
0.107	0.374901
0.107	0.373288
0.108	0.371352
0.109	0.369082
0.109	0.366712
0.11	0.364339
0.11	0.362486
0.111	0.361686
0.112	0.361279
0.112	0.360875
0.113	0.360342
0.114	0.359385
0.114	0.358368
0.115	0.357402
0.115	0.35643
0.116	0.355499
0.117	0.355
0.117	0.354667
0.118	0.354336
0.119	0.354081
0.119	0.353888
0.12	0.353601
0.12	0.353274
0.121	0.352945
0.122	0.351973
0.122	0.350837
0.123	0.349758
0.124	0.348689
0.124	0.348297
0.125	0.349164
0.125	0.350389
0.126	0.351623
0.127	0.352858
0.127	0.353387
0.128	0.353223
0.129	0.352917
0.129	0.352612
0.13	0.352939
0.13	0.353798
0.131	0.354712
0.132	0.355613
0.132	0.356311
0.133	0.356299
0.134	0.356802
0.134	0.357467
0.135	0.358103
0.135	0.358424
0.136	0.358516
0.137	0.358512
0.137	0.35849
0.138	0.358425
0.139	0.358221
0.139	0.358014
0.14	0.357921
0.14	0.357827
0.141	0.358405
0.142	0.359478
0.142	0.360075
0.143	0.360447
0.143	0.360642
0.144	0.360479
0.145	0.360513
0.145	0.360927
0.146	0.361341
0.147	0.362125
0.147	0.363276
0.148	0.36443
0.148	0.365586
0.149	0.367357
0.15	0.370061
0.15	0.372953
0.151	0.375709
0.152	0.378166
0.152	0.379161
0.153	0.379587
0.153	0.380538
0.154	0.381586
0.155	0.382353
0.155	0.382318
0.156	0.38107
0.157	0.379222
0.157	0.377245
0.158	0.374979
0.158	0.373099
0.159	0.371617
0.16	0.370135
0.16	0.369418
0.161	0.368868
0.162	0.367717
0.162	0.36635
0.163	0.365254
0.163	0.364743
0.164	0.365137
0.165	0.365927
0.165	0.366723
0.166	0.367469
0.167	0.368424
0.167	0.369648
0.168	0.370957
0.168	0.372352
0.169	0.374037
0.17	0.37601
0.17	0.378077
0.171	0.380127
0.172	0.382115
0.172	0.383141
0.173	0.383559
0.173	0.38392
0.174	0.384913
0.175	0.387451
0.175	0.390945
0.176	0.39462
0.177	0.398312
0.177	0.401929
0.178	0.405008
0.178	0.407858
0.179	0.410707
0.18	0.41366
0.18	0.416803
0.181	0.419494
0.182	0.42194
0.182	0.424359
0.183	0.426763
0.183	0.430557
0.184	0.434951
0.185	0.439325
0.185	0.444075
0.186	0.452629
0.187	0.462665
0.187	0.47274
0.188	0.482669
0.188	0.493475
0.189	0.505354
0.19	0.518003
0.19	0.531351
0.191	0.545292
0.192	0.559946
0.192	0.575436
0.193	0.590843
0.193	0.606255
0.194	0.622076
0.195	0.638649
0.195	0.655524
0.196	0.672458
0.197	0.68955
0.197	0.70786
0.198	0.727447
0.198	0.746993
0.199	0.766522
0.2	0.786791
0.2	0.808354
0.201	0.830287
0.202	0.852213
0.202	0.874103
0.203	0.896553
0.203	0.919823
0.204	0.943165
0.205	0.966378
0.205	0.989458
0.206	1.01205
0.207	1.0342
0.207	1.05635
0.208	1.07865
0.208	1.10193
0.209	1.12618
0.21	1.15044
0.21	1.17471
0.211	1.19953
0.212	1.2243
0.212	1.24858
0.213	1.27295
0.213	1.29754
0.214	1.3236
0.215	1.35097
0.215	1.37836
0.216	1.40567
0.217	1.43273
0.217	1.45715
0.218	1.4794
0.218	1.50162
0.219	1.52349
0.22	1.54404
0.22	1.56301
0.221	1.58124
0.222	1.59942
0.222	1.61747
0.223	1.63383
0.223	1.64895
0.224	1.66405
0.225	1.67934
0.225	1.69419
0.226	1.70807
0.227	1.72154
0.227	1.73498
0.228	1.74713
0.228	1.75707
0.229	1.76611
0.23	1.7752
0.23	1.7844
0.231	1.79254
0.232	1.79948
0.232	1.80607
0.233	1.81241
0.233	1.81765
0.234	1.8215
0.235	1.82485
0.235	1.8282
0.236	1.83199
0.237	1.83585
0.237	1.83916
0.238	1.84223
0.238	1.84492
0.239	1.84634
0.24	1.84601
0.24	1.84505
0.241	1.84408
0.242	1.8433
0.242	1.84208
0.243	1.84028
0.243	1.83818
0.244	1.8357
0.245	1.83177
0.245	1.82556
0.246	1.81808
0.247	1.81065
0.247	1.80266
0.248	1.79341
0.248	1.78398
0.249	1.77459
0.25	1.76548
0.25	1.75736
0.251	1.75033
0.252	1.74356
0.252	1.73684
0.253	1.72914
0.253	1.71968
0.254	1.71047
0.255	1.70123
0.255	1.69217
0.256	1.68361
0.257	1.67514
0.257	1.66641
0.258	1.65767
0.258	1.64834
0.259	1.63859
0.26	1.62994
0.26	1.62132
0.261	1.61212
0.262	1.60145
0.262	1.59004
0.263	1.57854
0.263	1.56696
0.264	1.55498
0.265	1.5433
0.265	1.53257
0.266	1.52192
0.267	1.51092
0.267	1.49917
0.268	1.48692
0.268	1.4745
0.269	1.46205
0.27	1.45019
0.27	1.43968
0.271	1.42998
0.272	1.4203
0.272	1.40995
0.273	1.39847
0.273	1.38667
0.274	1.3749
0.275	1.36269
0.275	1.34992
0.276	1.33803
0.277	1.32729
0.277	1.31652
0.278	1.3059
0.278	1.29635
0.279	1.28782
0.28	1.27954
0.28	1.2705
0.281	1.25937
0.282	1.2464
0.282	1.23282
0.283	1.21924
0.283	1.20616
0.284	1.19496
0.285	1.18512
0.285	1.17534
0.286	1.16535
0.287	1.15459
0.287	1.14297
0.288	1.13111
0.288	1.11926
0.289	1.10741
0.29	1.09648
0.29	1.08628
0.291	1.07615
0.292	1.06572
0.292	1.05544
0.293	1.04616
0.293	1.03735
0.294	1.02849
0.295	1.01995
0.295	1.01247
0.296	1.00572
0.296	0.998989
0.297	0.991892
0.298	0.98447
0.298	0.977411
0.299	0.970433
0.3	0.963466
0.3	0.956173
0.301	0.947566
0.301	0.938276
0.302	0.928981
0.303	0.919745
0.303	0.911336
0.304	0.904511
0.305	0.897918
0.305	0.891361
0.306	0.884859
0.306	0.878758
0.307	0.873449
0.308	0.86813
0.308	0.86286
0.309	0.857606
0.31	0.852258
0.31	0.846912
0.311	0.841532
0.311	0.836919
0.312	0.834445
0.313	0.833121
0.313	0.831796
0.314	0.830215
0.315	0.827546
0.315	0.823738
0.316	0.819832
0.316	0.815913
0.317	0.812617
0.318	0.810662
0.318	0.809051
0.319	0.80743
0.32	0.805606
0.32	0.803067
0.321	0.799906
0.321	0.796739
0.322	0.793583
0.323	0.790389
0.323	0.787234
0.324	0.784282
0.325	0.781334
0.325	0.778474
0.326	0.775925
0.326	0.773647
0.327	0.771361
0.328	0.769071
0.328	0.766932
0.329	0.765069
0.33	0.763283
0.33	0.761501
0.331	0.759709
0.331	0.758414
0.332	0.757954
0.333	0.757675
0.333	0.757396
0.334	0.756497
0.335	0.754565
0.335	0.752323
0.336	0.75008
0.336	0.747913
0.337	0.746124
0.338	0.744747
0.338	0.743409
0.339	0.742151
0.34	0.741266
0.34	0.740575
0.341	0.739745
0.341	0.738913
0.342	0.737907
0.343	0.736269
0.343	0.734118
0.344	0.731926
0.345	0.729715
0.345	0.727804
0.346	0.726615
0.346	0.725824
0.347	0.725033
0.348	0.724879
0.348	0.724775
0.349	0.724176
0.35	0.7236
0.35	0.722931
0.351	0.721864
0.351	0.720622
0.352	0.720139
0.353	0.719656
0.353	0.719044
0.354	0.71792
0.355	0.717303
0.355	0.716937
0.356	0.716652
0.356	0.716869
0.357	0.717629
0.358	0.71798
0.358	0.71833
0.359	0.718519
0.36	0.717983
0.36	0.717035
0.361	0.71606
0.361	0.715022
0.362	0.713538
0.363	0.711229
0.363	0.708938
0.364	0.706656
0.365	0.704561
0.365	0.703345
0.366	0.70308
0.366	0.702816
0.367	0.702507
0.368	0.70183
0.368	0.700478
0.369	0.699051
0.37	0.69763
0.37	0.696371
0.371	0.695426
0.371	0.694116
0.372	0.692804
0.373	0.691332
0.373	0.689395
0.374	0.687211
0.375	0.685141
0.375	0.683059
0.376	0.681159
0.376	0.679787
0.377	0.678623
0.378	0.677452
0.378	0.676219
0.379	0.674305
0.38	0.671102
0.38	0.667675
0.381	0.66428
0.381	0.661526
0.382	0.660587
0.383	0.660721
0.383	0.660853
0.384	0.66092
0.385	0.660963
0.385	0.661261
0.386	0.661679
0.386	0.662095
0.387	0.662069
0.388	0.66081
0.388	0.658785
0.389	0.656761
0.39	0.654834
0.39	0.653557
0.391	0.653177
0.391	0.652918
0.392	0.65266
0.393	0.651959
0.393	0.650958
0.394	0.650519
0.395	0.650083
0.395	0.649457
0.396	0.648037
0.396	0.645827
0.397	0.643514
0.398	0.641259
0.398	0.639732
0.399	0.639377
0.4	0.63944
0.4	0.639504
0.401	0.63982
0.401	0.640274
0.402	0.640414
0.403	0.640442
0.403	0.640456
0.404	0.640441
0.405	0.64069
0.405	0.641629
0.406	0.64257
0.406	0.643513
0.407	0.644398
0.408	0.644769
0.408	0.645016
0.409	0.645263
0.41	0.645591
0.41	0.646558
0.411	0.647948
0.411	0.649338
0.412	0.650628
0.413	0.65106
0.413	0.649698
0.414	0.647777
0.415	0.645853
0.415	0.643889
0.416	0.641969
0.416	0.640411
0.417	0.638851
0.418	0.63717
0.418	0.634885
0.419	0.63268
0.42	0.630635
0.42	0.628587
0.421	0.626637
0.421	0.625011
0.422	0.623071
0.423	0.621134
0.423	0.619298
0.424	0.618304
0.425	0.619074
0.425	0.619968
0.426	0.620857
0.426	0.621926
0.427	0.623758
0.428	0.625974
0.428	0.628186
0.429	0.630301
0.43	0.631613
0.43	0.631521
0.431	0.631428
0.431	0.631335
0.432	0.631099
0.433	0.630327
0.433	0.629257
0.434	0.628197
0.435	0.626825
0.435	0.624637
0.436	0.622158
0.436	0.61969
0.437	0.617324
0.438	0.615639
0.438	0.614904
0.439	0.614165
0.44	0.613427
0.44	0.61245
0.441	0.610684
0.441	0.608301
0.442	0.605936
0.443	0.603499
0.443	0.600894
0.444	0.598389
0.444	0.596161
0.445	0.593947
0.446	0.591833
0.446	0.590007
0.447	0.588398
0.448	0.586788
0.448	0.58503
0.449	0.582974
0.449	0.581113
0.45	0.579703
0.451	0.578301
0.451	0.577144
0.452	0.576094
0.453	0.574589
0.453	0.572972
0.454	0.57112
0.454	0.568481
0.455	0.564969
0.456	0.561216
0.456	0.557671
0.457	0.554384
0.458	0.552016
0.458	0.549199
0.459	0.546338
0.459	0.54349
0.46	0.540734
0.461	0.538386
0.461	0.536518
0.462	0.534629
0.463	0.532599
0.463	0.529885
0.464	0.527166
0.464	0.524458
0.465	0.521994
0.466	0.521799
0.466	0.523507
0.467	0.525845
0.468	0.528102
0.468	0.529354
0.469	0.52847
0.469	0.526372
0.47	0.524271
0.471	0.522439
0.471	0.522569
0.472	0.52447
0.473	0.526807
0.473	0.529049
0.474	0.530674
0.474	0.53105
0.475	0.532079
0.476	0.533094
0.476	0.533962
0.477	0.533853
0.478	0.532984
0.478	0.532038
0.479	0.531091
0.479	0.530289
0.48	0.530278
0.481	0.530987
0.481	0.531704
0.482	0.532376
0.483	0.532725
0.483	0.532411
0.484	0.532047
0.484	0.531732
0.485	0.532217
0.486	0.53504
0.486	0.538275
0.487	0.541499
0.488	0.544387
0.488	0.545463
0.489	0.544712
0.489	0.543959
0.49	0.543195
0.491	0.542341
0.491	0.541291
0.492	0.540198
0.493	0.539107
0.493	0.538293
0.494	0.538552
0.494	0.539544
0.495	0.540533
0.496	0.541425
0.496	0.541132
0.497	0.538303
0.498	0.534796
0.498	0.53127
0.499	0.528133
0.499	0.526597
0.5	0.526433
0.501	0.526269
0.501	0.526001
0.502	0.524772
0.503	0.521587
0.503	0.517519
0.504	0.513472
0.504	0.509718
0.505	0.507167
0.506	0.505822
0.506	0.504475
0.507	0.503091
0.508	0.501956
0.508	0.501643
0.509	0.501749
0.509	0.501816
0.51	0.501638
0.511	0.500343
0.511	0.498586
0.512	0.496794
0.513	0.49501
0.513	0.493968
0.514	0.493852
0.514	0.493929
0.515	0.494007
0.516	0.494155
0.516	0.49453
0.517	0.492767
0.518	0.490996
0.518	0.489212
0.519	0.487181
0.519	0.486453
0.52	0.486649
0.521	0.486819
0.521	0.486439
0.522	0.48429
0.523	0.48232
0.523	0.480351
0.524	0.478465
0.524	0.477866
0.525	0.476645
0.526	0.475192
0.526	0.473767
0.527	0.472784
0.528	0.473005
0.528	0.474023
0.529	0.475047
0.529	0.475893
0.53	0.475083
0.531	0.47355
0.531	0.471957
0.532	0.470438
0.533	0.46951
0.533	0.469416
0.534	0.46962
0.534	0.469834
0.535	0.470212
0.536	0.471126
0.536	0.471682
0.537	0.472232
0.538	0.472732
0.538	0.47289
0.539	0.472934
0.539	0.473037
0.54	0.473135
0.541	0.473234
0.541	0.473604
0.542	0.475151
0.543	0.476699
0.543	0.478058
0.544	0.478269
0.544	0.477491
0.545	0.476097
0.546	0.474787
0.546	0.474058
0.547	0.473854
0.548	0.473187
0.548	0.472517
0.549	0.472294
0.549	0.474067
0.55	0.476115
0.551	0.478288
0.551	0.480173
0.552	0.48079
0.553	0.481092
0.553	0.482913
0.554	0.484739
0.554	0.486888
0.555	0.489891
0.556	0.491716
0.556	0.493263
0.557	0.494748
0.558	0.49584
0.558	0.496127
0.559	0.495769
0.559	0.495413
0.56	0.495079
0.561	0.495269
0.561	0.496808
0.562	0.498468
0.563	0.499911
0.563	0.500675
0.564	0.500432
0.564	0.499662
0.565	0.498832
0.566	0.497983
0.566	0.496905
0.567	0.49513
0.568	0.493291
0.568	0.491468
0.569	0.491023
0.569	0.492432
0.57	0.494205
0.571	0.495984
0.571	0.497586
0.572	0.497587
0.573	0.497565
0.573	0.497546
0.574	0.497527
0.574	0.497874
0.575	0.499611
0.576	0.50167
0.576	0.503765
0.577	0.505624
0.578	0.506045
0.578	0.505645
0.579	0.505228
0.579	0.504811
0.58	0.504012
0.581	0.500674
0.581	0.497348
0.582	0.493973
0.583	0.491322
0.583	0.491582
0.584	0.493213
0.584	0.494846
0.585	0.496421
0.586	0.49618
0.586	0.493656
0.587	0.491172
0.588	0.4887
0.588	0.486222
0.589	0.48449
0.589	0.483145
0.59	0.48179
0.591	0.480444
0.591	0.479193
0.592	0.47793
0.593	0.476657
0.593	0.475373
0.594	0.474252
0.594	0.475072
0.595	0.476538
0.596	0.478004
0.596	0.479415
0.597	0.480421
0.597	0.481148
0.598	0.481878
0.599	0.482605
0.599	0.483203
0.6	0.482432
0.601	0.480297
0.601	0.478168
0.602	0.476163
0.602	0.475289
0.603	0.4762
0.604	0.47711
0.604	0.478013
0.605	0.47884
0.606	0.479216
0.606	0.479371
0.607	0.479527
0.607	0.47961
0.608	0.479352
0.609	0.479606
0.609	0.47986
0.61	0.480088
0.611	0.480148
0.611	0.480049
0.612	0.480089
0.612	0.480128
0.613	0.479946
0.614	0.478463
0.614	0.475509
0.615	0.472587
0.616	0.469762
0.616	0.467462
0.617	0.467093
0.617	0.467385
0.618	0.467728
0.619	0.468082
0.619	0.468831
0.62	0.469312
0.621	0.469732
0.621	0.470152
0.622	0.470525
0.622	0.470635
0.623	0.470632
0.624	0.470618
0.624	0.470603
0.625	0.470838
0.626	0.470093
0.626	0.46921
0.627	0.468326
0.627	0.467448
0.628	0.46542
0.629	0.463665
0.629	0.46195
0.63	0.460247
0.631	0.459247
0.631	0.458918
0.632	0.458648
0.632	0.458378
0.633	0.458117
0.634	0.457195
0.634	0.455898
0.635	0.454568
0.636	0.453253
0.636	0.451248
0.637	0.448983
0.637	0.446705
0.638	0.444425
0.639	0.442179
0.639	0.44065
0.64	0.43947
0.641	0.438309
0.641	0.437142
0.642	0.434884
0.642	0.433065
0.643	0.431264
0.644	0.429469
0.644	0.428356
0.645	0.428819
0.646	0.429522
0.646	0.430226
0.647	0.43093
0.647	0.431894
0.648	0.432843
0.649	0.433793
0.649	0.434744
0.65	0.435675
0.651	0.435685
0.651	0.435644
0.652	0.435603
0.652	0.435564
0.653	0.43557
0.654	0.435759
0.654	0.435948
0.655	0.436137
0.656	0.436307
0.656	0.436127
0.657	0.435766
0.657	0.435408
0.658	0.43505
0.659	0.434865
0.659	0.436318
0.66	0.437778
0.661	0.439221
0.661	0.44036
0.662	0.440003
0.662	0.438925
0.663	0.437849
0.664	0.436848
0.664	0.43657
0.665	0.436389
0.666	0.436209
0.666	0.436018
0.667	0.435817
0.667	0.436189
0.668	0.436847
0.669	0.437498
0.669	0.438095
0.67	0.438362
0.671	0.438516
0.671	0.438677
0.672	0.438847
0.672	0.438783
0.673	0.43909
0.674	0.439627
0.674	0.440197
0.675	0.440767
0.676	0.441161
0.676	0.440758
0.677	0.440166
0.677	0.439575
0.678	0.439603
0.679	0.440861
0.679	0.441993
0.68	0.443041
0.681	0.444094
0.681	0.443779
0.682	0.44323
0.682	0.442684
0.683	0.442141
0.684	0.441252
0.684	0.439782
0.685	0.438226
0.686	0.436674
0.686	0.43512
0.687	0.433744
0.687	0.432466
0.688	0.431204
0.689	0.429958
0.689	0.428955
0.69	0.428323
0.691	0.427721
0.691	0.427111
0.692	0.426504
0.692	0.428002
0.693	0.430461
0.694	0.43299
0.694	0.435506
0.695	0.437556
0.696	0.438318
0.696	0.43876
0.697	0.439191
0.697	0.43947
0.698	0.43847
0.699	0.437499
0.699	0.436523
0.7	0.435555
0.701	0.434088
0.701	0.432686
0.702	0.43137
0.702	0.430057
0.703	0.428818
0.704	0.428453
0.704	0.428818
0.705	0.429211
0.706	0.429606
0.706	0.430062
0.707	0.430098
0.707	0.429996
0.708	0.429891
0.709	0.429852
0.709	0.429653
0.71	0.42768
0.711	0.425659
0.711	0.423655
0.712	0.421634
0.712	0.421234
0.713	0.421245
0.714	0.421256
0.714	0.421254
0.715	0.421629
0.716	0.422619
0.716	0.423604
0.717	0.42461
0.717	0.425842
0.718	0.426913
0.719	0.427962
0.719	0.428973
0.72	0.429249
0.721	0.428545
0.721	0.427425
0.722	0.426296
0.722	0.425236
0.723	0.425066
0.724	0.423256
0.724	0.421333
0.725	0.41929
0.726	0.417153
0.726	0.415358
0.727	0.414115
0.727	0.413029
0.728	0.411942
0.729	0.410072
0.729	0.408984
0.73	0.408293
0.731	0.407603
0.731	0.407612
0.732	0.408732
0.732	0.410326
0.733	0.411972
0.734	0.413338
0.734	0.4134
0.735	0.412603
0.736	0.411656
0.736	0.410712
0.737	0.41062
0.737	0.411097
0.738	0.411636
0.739	0.412165
0.739	0.412567
0.74	0.411745
0.741	0.410115
0.741	0.408359
0.742	0.406609
0.742	0.406113
0.743	0.406497
0.744	0.407033
0.744	0.407573
0.745	0.407839
0.746	0.406949
0.746	0.405856
0.747	0.404769
0.747	0.403686
0.748	0.402782
0.749	0.40175
0.749	0.400664
0.75	0.399578
0.75	0.398665
0.751	0.398787
0.752	0.399709
0.752	0.400739
0.753	0.401768
0.754	0.402595
0.754	0.402495
0.755	0.402049
0.755	0.40157
0.756	0.401055
0.757	0.400418
0.757	0.39979
0.758	0.399175
0.759	0.398553
0.759	0.398258
0.76	0.399329
0.76	0.400554
0.761	0.401777
0.762	0.40298
0.762	0.403189
0.763	0.402717
0.764	0.402197
0.764	0.401672
0.765	0.401146
0.765	0.401794
0.766	0.402535
0.767	0.403273
0.767	0.40402
0.768	0.403823
0.769	0.403116
0.769	0.402386
0.77	0.401659
0.77	0.401336
0.771	0.402685
0.772	0.404084
0.772	0.405492
0.773	0.406907
0.774	0.407151
0.774	0.406707
0.775	0.406252
0.775	0.4058
0.776	0.404544
0.777	0.403839
0.777	0.403173
0.778	0.402473
0.779	0.401871
0.779	0.402446
0.78	0.403606
0.78	0.404745
0.781	0.40589
0.782	0.406032
0.782	0.404756
0.783	0.403022
0.784	0.401289
0.784	0.399798
0.785	0.399591
0.785	0.400015
0.786	0.400469
0.787	0.400926
0.787	0.401202
0.788	0.401414
0.789	0.401635
0.789	0.401857
0.79	0.402
0.79	0.401551
0.791	0.400694
0.792	0.399764
0.792	0.398833
0.793	0.398206
0.794	0.397886
0.794	0.397636
0.795	0.397386
0.795	0.39721
0.796	0.397645
0.797	0.398479
0.797	0.399388
0.798	0.400293
0.799	0.401208
0.799	0.402046
0.8	0.402866
0.8	0.403684
0.801	0.404514
0.802	0.405182
0.802	0.405595
0.803	0.405948
0.804	0.406306
0.804	0.407007
0.805	0.407735
0.805	0.408445
0.806	0.409153
0.807	0.40973
0.807	0.410098
0.808	0.411054
0.809	0.41217
0.809	0.413288
0.81	0.414965
0.81	0.415512
0.811	0.415764
0.812	0.416017
0.812	0.416147
0.813	0.416227
0.814	0.417035
0.814	0.417989
0.815	0.418948
0.815	0.419998
0.816	0.420085
0.817	0.419988
0.817	0.419889
0.818	0.419792
0.819	0.418745
0.819	0.417675
0.82	0.416612
0.82	0.415541
0.821	0.415641
0.822	0.417012
0.822	0.418532
0.823	0.420055
0.824	0.421262
0.824	0.420809
0.825	0.420073
0.825	0.419317
0.826	0.418563
0.827	0.418172
0.827	0.417561
0.828	0.41692
0.829	0.416277
0.829	0.415952
0.83	0.416318
0.83	0.416718
0.831	0.417122
0.832	0.41755
0.832	0.418076
0.833	0.418658
0.834	0.419234
0.834	0.419809
0.835	0.420247
0.835	0.419775
0.836	0.418561
0.837	0.417227
0.837	0.415891
0.838	0.415336
0.839	0.416457
0.839	0.418326
0.84	0.420194
0.84	0.422071
0.841	0.421795
0.842	0.4198
0.842	0.417544
0.843	0.415287
0.844	0.413941
0.844	0.414794
0.845	0.416619
0.845	0.418445
0.846	0.420258
0.847	0.420623
0.847	0.419991
0.848	0.419248
0.849	0.4185
0.849	0.417721
0.85	0.417834
0.85	0.418404
0.851	0.418974
0.852	0.419526
0.852	0.419188
0.853	0.417875
0.854	0.416303
0.854	0.414736
0.855	0.413777
0.855	0.414318
0.856	0.415401
0.857	0.41648
0.857	0.417555
0.858	0.418147
0.859	0.418447
0.859	0.418711
0.86	0.418974
0.86	0.419366
0.861	0.419468
0.862	0.419453
0.862	0.419438
0.863	0.419423
0.864	0.418993
0.864	0.418408
0.865	0.417814
0.865	0.417223
0.866	0.416528
0.867	0.41625
0.867	0.416097
0.868	0.415943
0.869	0.415789
0.869	0.414746
0.87	0.413083
0.87	0.411319
0.871	0.409567
0.872	0.407108
0.872	0.405863
0.873	0.405157
0.874	0.404504
0.874	0.403853
0.875	0.403253
0.875	0.401876
0.876	0.400341
0.877	0.3988
0.877	0.397504
0.878	0.39812
0.879	0.399068
0.879	0.400015
0.88	0.400965
0.88	0.400808
0.881	0.40051
0.882	0.400215
0.882	0.399922
0.883	0.400065
0.884	0.400687
0.884	0.40137
0.885	0.402077
0.885	0.402818
0.886	0.403209
0.887	0.403083
0.887	0.402792
0.888	0.402501
0.889	0.401824
0.889	0.400755
0.89	0.399633
0.89	0.398515
0.891	0.397477
0.892	0.396946
0.892	0.396585
0.893	0.396074
0.894	0.395564
0.894	0.394837
0.895	0.393948
0.895	0.393059
0.896	0.392177
0.897	0.391293
0.897	0.390256
0.898	0.389322
0.899	0.388536
0.899	0.387755
0.9	0.387456
0.9	0.38795
0.901	0.388761
0.902	0.389572
0.902	0.390383
0.903	0.391164
0.903	0.392457
0.904	0.394071
0.905	0.395696
0.905	0.397547
0.906	0.398816
0.907	0.399462
0.907	0.399986
0.908	0.400482
0.908	0.400541
0.909	0.400078
0.91	0.399463
0.91	0.398851
0.911	0.398241
0.912	0.398524
0.912	0.399248
0.913	0.399979
0.913	0.40066
0.914	0.40085
0.915	0.40047
0.915	0.399937
0.916	0.399402
0.917	0.39885
0.917	0.398384
0.918	0.397965
0.918	0.397544
0.919	0.397183
0.92	0.397593
0.92	0.39853
0.921	0.399559
0.922	0.400587
0.922	0.401581
0.923	0.401624
0.923	0.401325
0.924	0.401025
0.925	0.400699
0.925	0.400584
0.926	0.400833
0.927	0.401179
0.927	0.401528
0.928	0.401122
0.928	0.400632
0.929	0.400187
0.93	0.399746
0.93	0.399279
0.931	0.398132
0.932	0.396167
0.932	0.394014
0.933	0.39188
0.933	0.390913
0.934	0.391275
0.935	0.391897
0.935	0.392522
0.936	0.39281
0.937	0.392282
0.937	0.391444
0.938	0.390545
0.938	0.389602
0.939	0.38934
0.94	0.390184
0.94	0.391319
0.941	0.392454
0.942	0.393479
0.942	0.394196
0.943	0.394714
0.943	0.39523
0.944	0.395745
0.945	0.396734
0.945	0.398384
0.946	0.400199
0.947	0.40202
0.947	0.403963
0.948	0.406249
0.948	0.408773
0.949	0.411303
0.95	0.413828
0.95	0.415204
0.951	0.415324
0.952	0.415282
0.952	0.41524
0.953	0.415827
0.953	0.417343
0.954	0.419171
0.955	0.420986
0.955	0.42289
0.956	0.425253
0.957	0.427984
0.957	0.430733
0.958	0.433486
0.958	0.436205
0.959	0.439417
0.96	0.443276
0.96	0.447331
0.961	0.451106
0.962	0.453974
0.962	0.456377
0.963	0.45881
0.963	0.461245
0.964	0.46348
0.965	0.464623
0.965	0.464906
0.966	0.46504
0.967	0.465102
0.967	0.465195
0.968	0.465705
0.968	0.466477
0.969	0.467234
0.97	0.468393
0.97	0.468988
0.971	0.468862
0.972	0.468665
0.972	0.468117
0.973	0.467127
0.973	0.466221
0.974	0.46546
0.975	0.464768
0.975	0.464747
0.976	0.464563
0.977	0.463968
0.977	0.463332
0.978	0.462297
0.978	0.460585
0.979	0.458375
0.98	0.456025
0.98	0.453723
0.981	0.451638
0.982	0.45104
0.982	0.451196
0.983	0.451352
0.983	0.45123
0.984	0.450056
0.985	0.447885
0.985	0.445457
0.986	0.443032
0.987	0.440753
0.987	0.4381
0.988	0.43523
0.988	0.432366
0.989	0.430061
0.99	0.428632
0.99	0.427551
0.991	0.426523
0.992	0.425479
0.992	0.424367
0.993	0.423618
0.993	0.423648
0.994	0.423679
0.995	0.423756
0.995	0.424074
0.996	0.424703
0.997	0.425388
0.997	0.426072
0.998	0.426482
0.998	0.426502
0.999	0.426637
1	0.426772
1	0.426734
1.001	0.425746
1.002	0.423674
1.002	0.421553
1.003	0.419435
1.003	0.418105
1.004	0.418543
1.005	0.419868
1.005	0.421196
1.006	0.422399
1.007	0.422708
1.007	0.422013
1.008	0.421316
1.008	0.420622
1.009	0.41993
1.01	0.4193
1.01	0.418759
1.011	0.418221
1.012	0.417762
1.012	0.418297
1.013	0.419913
1.013	0.421542
1.014	0.423177
1.015	0.424693
1.015	0.425958
1.016	0.427094
1.017	0.428232
1.017	0.42923
1.018	0.429347
1.018	0.428674
1.019	0.428005
1.02	0.427333
1.02	0.426096
1.021	0.423791
1.022	0.42098
1.022	0.418167
1.023	0.415457
1.023	0.413555
1.024	0.412305
1.025	0.411052
1.025	0.409808
1.026	0.409133
1.027	0.409083
1.027	0.409136
1.028	0.409188
1.028	0.409329
1.029	0.410144
1.03	0.411502
1.03	0.412902
1.031	0.414308
1.032	0.415999
1.032	0.4185
1.033	0.421474
1.033	0.424443
1.034	0.427347
1.035	0.429391
1.035	0.430304
1.036	0.430843
1.037	0.431099
1.037	0.430132
1.038	0.428884
1.038	0.427916
1.039	0.426956
1.04	0.426489
1.04	0.42695
1.041	0.42796
1.042	0.429076
1.042	0.430443
1.043	0.432365
1.043	0.433135
1.044	0.433058
1.045	0.432983
1.045	0.432879
1.046	0.432886
1.047	0.433478
1.047	0.434379
1.048	0.435089
1.048	0.434943
1.049	0.43422
1.05	0.434297
1.05	0.434374
1.051	0.435014
1.051	0.437087
1.052	0.43961
1.053	0.44229
1.053	0.444569
1.054	0.445321
1.055	0.4444
1.055	0.442909
1.056	0.441418
1.056	0.44069
1.057	0.441056
1.058	0.440514
1.058	0.439772
1.059	0.43882
1.06	0.437097
1.06	0.434602
1.061	0.431941
1.061	0.429286
1.062	0.426687
1.063	0.424168
1.063	0.421604
1.064	0.419054
1.065	0.416455
1.065	0.413727
1.066	0.410997
1.066	0.408317
1.067	0.405629
1.068	0.404079
1.068	0.405059
1.069	0.407175
1.07	0.40929
1.07	0.411117
1.071	0.411889
1.071	0.411618
1.072	0.411145
1.073	0.410658
1.073	0.409875
1.074	0.408322
1.075	0.406232
1.075	0.404138
1.076	0.402002
1.076	0.399787
1.077	0.397557
1.078	0.395337
1.078	0.393121
1.079	0.391717
1.08	0.392042
1.08	0.39328
1.081	0.394513
1.081	0.395641
1.082	0.395612
1.083	0.394352
1.083	0.392987
1.084	0.391624
1.085	0.391221
1.085	0.392748
1.086	0.395215
1.086	0.39769
1.087	0.40004
1.088	0.401033
1.088	0.400825
1.089	0.400618
1.09	0.400375
1.09	0.400104
1.091	0.400316
1.091	0.400957
1.092	0.401598
1.093	0.402873
1.093	0.404881
1.094	0.407026
1.095	0.409166
1.095	0.411059
1.096	0.41223
1.096	0.413065
1.097	0.413918
1.098	0.414731
1.098	0.415556
1.099	0.415939
1.1	0.41449
1.1	0.413025
1.101	0.411729
1.101	0.411423
1.102	0.412708
1.103	0.414553
1.103	0.416398
1.104	0.418281
1.105	0.42034
1.105	0.422618
1.106	0.424895
1.106	0.426913
1.107	0.428
1.108	0.428477
1.108	0.429023
1.109	0.429562
1.11	0.430004
1.11	0.429954
1.111	0.429069
1.111	0.428099
1.112	0.427241
1.113	0.426765
1.113	0.426667
1.114	0.426809
1.115	0.426983
1.115	0.427355
1.116	0.427809
1.116	0.42776
1.117	0.427711
1.118	0.427555
1.118	0.427204
1.119	0.427019
1.12	0.426947
1.12	0.426974
1.121	0.427623
1.121	0.429342
1.122	0.431468
1.123	0.43359
1.123	0.43524
1.124	0.435349
1.125	0.434118
1.125	0.43255
1.126	0.431109
1.126	0.430351
1.127	0.430789
1.128	0.431903
1.128	0.433017
1.129	0.433939
1.13	0.434476
1.13	0.434908
1.131	0.435329
1.131	0.435621
1.132	0.435202
1.133	0.433574
1.133	0.431251
1.134	0.428924
1.135	0.426753
1.135	0.424781
1.136	0.422754
1.136	0.420716
1.137	0.418951
1.138	0.418383
1.138	0.419348
1.139	0.420869
1.14	0.422391
1.14	0.423323
1.141	0.423591
1.141	0.424015
1.142	0.424437
1.143	0.425144
1.143	0.426321
1.144	0.427549
1.145	0.428683
1.145	0.429766
1.146	0.430276
1.146	0.429999
1.147	0.429499
1.148	0.428997
1.148	0.428072
1.149	0.426439
1.15	0.424586
1.15	0.422833
1.151	0.42118
1.151	0.419961
1.152	0.419468
1.153	0.417963
1.153	0.416424
1.154	0.414966
1.155	0.414306
1.155	0.415429
1.156	0.417064
1.156	0.418701
1.157	0.420167
1.158	0.420646
1.158	0.42039
1.159	0.420134
1.16	0.419786
1.16	0.419009
1.161	0.418248
1.161	0.417596
1.162	0.416941
1.163	0.416505
1.163	0.417079
1.164	0.418064
1.165	0.419055
1.165	0.420182
1.166	0.42183
1.166	0.423509
1.167	0.425146
1.168	0.426793
1.168	0.428099
1.169	0.42802
1.17	0.427134
1.17	0.426248
1.171	0.425279
1.171	0.424328
1.172	0.4242
1.173	0.424071
1.173	0.42392
1.174	0.423327
1.175	0.421509
1.175	0.419202
1.176	0.416907
1.176	0.414767
1.177	0.413385
1.178	0.41295
1.178	0.412514
1.179	0.412069
1.18	0.411723
1.18	0.41197
1.181	0.412846
1.181	0.413732
1.182	0.414607
1.183	0.414874
1.183	0.413927
1.184	0.412993
1.185	0.412081
1.185	0.411246
1.186	0.410246
1.186	0.408877
1.187	0.407502
1.188	0.405996
1.188	0.404406
1.189	0.403044
1.19	0.401726
1.19	0.400402
1.191	0.399583
1.191	0.399783
1.192	0.400347
1.193	0.400912
1.193	0.401443
1.194	0.401558
1.195	0.401145
1.195	0.400733
1.196	0.40032
1.196	0.399414
1.197	0.397605
1.198	0.395463
1.198	0.393321
1.199	0.391583
1.2	0.391627
1.2	0.393339
1.201	0.3951
1.201	0.396854
1.202	0.397781
1.203	0.397785
1.203	0.397839
1.204	0.397889
1.204	0.397901
1.205	0.397934
1.206	0.398334
1.206	0.398758
1.207	0.399186
1.208	0.399898
1.208	0.402661
1.209	0.405153
1.209	0.40764
1.21	0.410057
1.211	0.411858
1.211	0.413161
1.212	0.414457
1.213	0.415755
1.213	0.416848
1.214	0.416741
1.214	0.416636
1.215	0.41653
1.216	0.416476
1.216	0.416612
1.217	0.41641
1.218	0.416211
1.218	0.415989
1.219	0.415641
1.219	0.415247
1.22	0.415126
1.221	0.415007
1.221	0.414857
1.222	0.414424
1.223	0.413343
1.223	0.412197
1.224	0.411127
1.224	0.410538
1.225	0.41054
1.226	0.410638
1.226	0.410734
1.227	0.411094
1.228	0.412467
1.228	0.414257
1.229	0.416143
1.229	0.41801
1.23	0.419661
1.231	0.420108
1.231	0.418991
1.232	0.417928
1.233	0.417172
1.233	0.417494
1.234	0.419431
1.234	0.421567
1.235	0.423643
1.236	0.425592
1.236	0.427609
1.237	0.429852
1.238	0.43209
1.238	0.433963
1.239	0.434066
1.239	0.432185
1.24	0.430318
1.241	0.428572
1.241	0.427515
1.242	0.427557
1.243	0.42828
1.243	0.428996
1.244	0.429262
1.244	0.429029
1.245	0.42975
1.246	0.430474
1.246	0.431017
1.247	0.430969
1.248	0.430352
1.248	0.429571
[truncated: 51,864 more rows]

## Sheet: YFP
Days of expression	Fluorescence intensity (RFU)
1	753
2	27344
3	41330
4	51194

## Sheet: Insect cell viability
Days of expression	% Cell viability
1	100
2	100
3	94
4	67
