# Supplementary material for: Purified zymogens reveal mechanisms of snake venom metalloproteinase auto-activation
Source: eLife. 2026 Jun 10;15:RP109112. doi: 10.7554/eLife.109112 (PMC13252954; doi:10.7554/eLife.109112)
Supplement: Figure 4—figure supplement 1—source data 1. [file elife-109112-fig4-figsupp1-data1.xlsx]

## Sheet: 11a
Repeat 1 - fluorescence vs time										Repeat 2 - fluorescence vs time										Bar graph
Time (min)	Buffer control		PI		PII		PIII			Time (min)	Buffer control		PI		PII		PIII				PI		PII		PIII
0	46787	46648	46106	46333	45506	46072	47587	48058		0	47302	39318	45325	47956	43813	46176	42815	46441		Rate of reaction (RFU/min)	20.1	2.72	26.12	3.34	894.6	7.424
1	47050	46664	46153	46076	45322	45607	48413	48926		1	43086	38980	44746	47166	43657	45712	42986	46654
2	46750	45912	46208	46102	45236	45533	48761	49266		2	43388	38852	44333	46551	42865	45154	43774	46721
3	46645	46102	46023	45933	45003	45509	49833	49952		3	43239	38972	44513	46469	42956	44673	44345	47228
4	46852	45957	46055	45947	44909	44956	50085	50851		4	42885	38553	44242	46499	43000	44109	44779	47881
5	46103	45952	45613	45742	44657	45207	51414	51612		5	42760	38440	44434	46147	42623	44317	45361	47838
6	46540	45543	45688	45747	44183	44805	51892	52423		6	42213	38567	44271	45833	42355	44408	45636	48576
7	46121	45020	45732	45549	44519	44702	52927	52740		7	42313	37973	44037	45998	42511	44259	46235	48937
8	46213	45281	45622	45726	44040	44285	53627	53574		8	42123	37775	43914	45788	42446	44078	47006	49918
9	46026	45107	45348	45002	44291	44579	54712	54086		9	42312	37978	43836	45837	42123	44114	47496	50378
10	45940	44813	45125	44837	44108	44152	55265	54618		10	42246	37499	43548	45642	42051	43962	47884	50932
11	46062	45066	45001	45061	43492	44153	56838	55891		11	41825	37525	43440	45507	42158	44042	47897	51240
12	45739	45173	45217	44953	43491	44096	57502	56906		12	41667	37042	43676	45396	41466	43793	48828	51472
13	45808	44453	45263	44857	43190	43939	58067	58048		13	41747	36976	43335	45778	41666	43565	49265	52303
14	45895	44891	44977	44791	43208	43326	59584	58893		14	41294	36982	43232	45496	41671	43530	49810	52266
15	45450	44684	45104	44347	43018	43717	60692	60175		15	41356	36727	43004	45430	41498	43412	50484	53227
16	45429	44493	44956	44557	43307	43416	61465	60626		16	41182	36923	42995	45508	41301	43454	50989	54283
17	45477	44491	44832	44313	43118	43185	62340	61693		17	41074	36542	43542	45431	40935	43282	51734	54453
18	45357	44594	44669	44119	42874	43410	64026	63172		18	41454	36611	43196	45267	41168	43138	52705	55144
19	45448	44710	45161	44289	42553	43216	64820	64586		19	41166	36689	43411	45059	40944	43104	53238	55240
20	44976	44368	44693	44148	42499	42840	65957	65803		20	41032	36589	43103	45011	40904	43103	53964	56467
21	45141	44264	44645	44268	42559	42812	66601	66914		21	41174	36585	43077	45206	40911	43178	54153	57014
22	44990	44350	44448	44322	42552	42714	68530	67693		22	40904	36749	43174	45382	40909	42703	54882	57186
23	44866	44414	44356	43934	42176	42439	69917	69046		23	40904	36622	43265	45281	40722	42604	55490	57938
24	45069	44089	44424	44380	42178	42570	70780	70164		24	41169	36491	43048	44955	40784	42126	56864	58707
25	44773	44166	44176	44126	41876	42038	71655	71020		25	40778	36396	43069	45005	40282	42191	57165	59424
26	44383	43716	44095	43878	42142	42336	73308	71839		26	40703	36508	42843	44862	40481	42483	57624	59784
27	44573	43748	44332	43782	41788	42352	74294	72885		27	40844	36323	42985	44543	40520	42638	58784	60508
28	44390	44163	43953	43847	41408	41933	75757	74334		28	40817	36192	42259	45054	40560	42297	59079	61171
29	44333	43431	44283	43858	41417	41964	76815	75113		29	41148	36448	42698	44720	40471	42416	60011	61799
30	44218	43912	44203	44074	41595	41995	78011	76282		30	40319	36443	42821	44630	40229	42474	60854	62211

## Sheet: 11b
PII			Insulin B control
Retention Time (minutes)	Absorbance at 214nm		Retention Time (minutes)	Absorbance at 214nm
0.00215	0		0.002117	0
0.00635	-0.01053		0.006283	-0.01183
0.010483	-0.0721		0.01045	-0.08032
0.014683	-0.2319		0.014617	-0.25716
0.018817	-0.47981		0.018783	-0.53115
0.023017	-0.74386		0.02295	-0.82157
0.02715	-0.95506		0.027117	-1.04714
0.03135	-1.08815		0.031283	-1.1771
0.035483	-1.1527		0.03545	-1.22883
0.039683	-1.17336		0.039617	-1.23896
0.043817	-1.17818		0.043783	-1.23761
0.048017	-1.1862		0.04795	-1.23973
0.05215	-1.19768		0.052117	-1.24844
0.05635	-1.20151		0.056283	-1.25912
0.060483	-1.19288		0.06045	-1.26101
0.064683	-1.18036		0.064617	-1.246
0.068817	-1.17654		0.068783	-1.22017
0.073017	-1.18454		0.07295	-1.19881
0.07715	-1.19518		0.077117	-1.19035
0.08135	-1.19836		0.081283	-1.19148
0.085483	-1.19375		0.08545	-1.19523
0.089683	-1.1856		0.089617	-1.1968
0.093817	-1.17348		0.093783	-1.19311
0.098017	-1.15747		0.09795	-1.1837
0.10215	-1.14705		0.102117	-1.17192
0.10635	-1.154		0.106283	-1.16216
0.110483	-1.17696		0.11045	-1.15738
0.114683	-1.20176		0.114617	-1.16023
0.118817	-1.21606		0.118783	-1.17156
0.123017	-1.21654		0.12295	-1.1863
0.12715	-1.20629		0.127117	-1.1978
0.13135	-1.1932		0.131283	-1.20353
0.135483	-1.18562		0.13545	-1.19917
0.139683	-1.18458		0.139617	-1.17929
0.143817	-1.18677		0.143783	-1.15165
0.148017	-1.1931		0.14795	-1.13511
0.15215	-1.20519		0.152117	-1.13751
0.15635	-1.2195		0.156283	-1.14817
0.160483	-1.22989		0.16045	-1.15353
0.164683	-1.23039		0.164617	-1.15185
0.168817	-1.21748		0.168783	-1.14973
0.173017	-1.19536		0.17295	-1.14837
0.17715	-1.17627		0.177117	-1.14051
0.18135	-1.17185		0.181283	-1.12394
0.185483	-1.1835		0.18545	-1.10908
0.189683	-1.19988		0.189617	-1.10676
0.193817	-1.20646		0.193783	-1.11682
0.198017	-1.19977		0.19795	-1.13118
0.20215	-1.18774		0.202117	-1.14224
0.20635	-1.17764		0.206283	-1.14626
0.210483	-1.1721		0.21045	-1.14121
0.214683	-1.17316		0.214617	-1.12694
0.218817	-1.18261		0.218783	-1.10877
0.223017	-1.19931		0.22295	-1.09623
0.22715	-1.21733		0.227117	-1.09458
0.23135	-1.22713		0.231283	-1.09971
0.235483	-1.22138		0.23545	-1.10632
0.239683	-1.20296		0.239617	-1.11532
0.243817	-1.18447		0.243783	-1.12547
0.248017	-1.17506		0.24795	-1.12697
0.25215	-1.17438		0.252117	-1.11335
0.25635	-1.1804		0.256283	-1.09107
0.260483	-1.19201		0.26045	-1.07222
0.264683	-1.20489		0.264617	-1.06554
0.268817	-1.2109		0.268783	-1.07446
0.273017	-1.20206		0.27295	-1.09607
0.27715	-1.17886		0.277117	-1.12072
0.28135	-1.15514		0.281283	-1.13494
0.285483	-1.14854		0.28545	-1.13044
0.289683	-1.16537		0.289617	-1.11353
0.293817	-1.19739		0.293783	-1.09948
0.298017	-1.23089		0.29795	-1.09695
0.30215	-1.25618		0.302117	-1.10415
0.30635	-1.26997		0.306283	-1.11578
0.310483	-1.27223		0.31045	-1.12601
0.314683	-1.26427		0.314617	-1.12704
0.318817	-1.24966		0.318783	-1.10996
0.323017	-1.23177		0.32295	-1.0719
0.32715	-1.2114		0.327117	-1.02635
0.33135	-1.19182		0.331283	-0.9987
0.335483	-1.18063		0.33545	-1.00195
0.339683	-1.18312		0.339617	-1.02367
0.343817	-1.19694		0.343783	-1.04364
0.348017	-1.2119		0.34795	-1.05539
0.35215	-1.2165		0.352117	-1.06146
0.35635	-1.20949		0.356283	-1.05691
0.360483	-1.20087		0.36045	-1.03511
0.364683	-1.19817		0.364617	-1.00488
0.368817	-1.20028		0.368783	-0.98382
0.373017	-1.20509		0.37295	-0.98079
0.37715	-1.21297		0.377117	-0.99378
0.38135	-1.22249		0.381283	-1.01413
0.385483	-1.22818		0.38545	-1.03118
0.389683	-1.22485		0.389617	-1.0382
0.393817	-1.21392		0.393783	-1.03116
0.398017	-1.20145		0.39795	-1.00994
0.40215	-1.19153		0.402117	-0.98577
0.40635	-1.1861		0.406283	-0.97499
0.410483	-1.18721		0.41045	-0.98255
0.414683	-1.19435		0.414617	-1.00001
0.418817	-1.2029		0.418783	-1.01815
0.423017	-1.20785		0.42295	-1.03301
0.42715	-1.20802		0.427117	-1.04172
0.43135	-1.20658		0.431283	-1.03848
0.435483	-1.20631		0.43545	-1.01889
0.439683	-1.2069		0.439617	-0.99096
0.443817	-1.2085		0.443783	-0.9715
0.448017	-1.21268		0.44795	-0.96872
0.45215	-1.21664		0.452117	-0.97999
0.45635	-1.21209		0.456283	-0.99839
0.460483	-1.19469		0.46045	-1.01362
0.464683	-1.17285		0.464617	-1.01615
0.468817	-1.16238		0.468783	-1.00336
0.473017	-1.17071		0.47295	-0.98267
0.47715	-1.19093		0.477117	-0.96776
0.48135	-1.21168		0.481283	-0.96619
0.485483	-1.22688		0.48545	-0.97579
0.489683	-1.23386		0.489617	-0.99237
0.493817	-1.228		0.493783	-1.00974
0.498017	-1.20851		0.49795	-1.01617
0.50215	-1.18469		0.502117	-1.00096
0.50635	-1.16774		0.506283	-0.96717
0.510483	-1.16364		0.51045	-0.93501
0.514683	-1.17292		0.514617	-0.92713
0.518817	-1.18869		0.518783	-0.95004
0.523017	-1.20065		0.52295	-0.99197
0.52715	-1.20494		0.527117	-1.03428
0.53135	-1.20438		0.531283	-1.06201
0.535483	-1.20131		0.53545	-1.06665
0.539683	-1.19645		0.539617	-1.04472
0.543817	-1.19188		0.543783	-1.00111
0.548017	-1.19108		0.54795	-0.95567
0.55215	-1.19658		0.552117	-0.93264
0.55635	-1.20583		0.556283	-0.93728
0.560483	-1.2124		0.56045	-0.95412
0.564683	-1.21384		0.564617	-0.96664
0.568817	-1.21227		0.568783	-0.96925
0.573017	-1.20788		0.57295	-0.9643
0.57715	-1.19917		0.577117	-0.95517
0.58135	-1.18784		0.581283	-0.94508
0.585483	-1.18168		0.58545	-0.94032
0.589683	-1.18998		0.589617	-0.94775
0.593817	-1.21173		0.593783	-0.96729
0.598017	-1.23396		0.59795	-0.9917
0.60215	-1.24347		0.602117	-1.01443
0.60635	-1.234		0.606283	-1.03579
0.610483	-1.20896		0.61045	-1.06216
0.614683	-1.18374		0.614617	-1.09778
0.618817	-1.17721		0.618783	-1.14016
0.623017	-1.19487		0.62295	-1.18765
0.62715	-1.22543		0.627117	-1.24394
0.63135	-1.25472		0.631283	-1.31029
0.635483	-1.27617		0.63545	-1.37934
0.639683	-1.28779		0.639617	-1.4384
0.643817	-1.28693		0.643783	-1.47748
0.648017	-1.27347		0.64795	-1.49382
0.65215	-1.25451		0.652117	-1.48969
0.65635	-1.23999		0.656283	-1.47263
0.660483	-1.23477		0.66045	-1.45573
0.664683	-1.23742		0.664617	-1.44892
0.668817	-1.24376		0.668783	-1.45269
0.673017	-1.25027		0.67295	-1.46214
0.67715	-1.25544		0.677117	-1.47213
0.68135	-1.25885		0.681283	-1.47773
0.685483	-1.26083		0.68545	-1.4746
0.689683	-1.26341		0.689617	-1.46118
0.693817	-1.26906		0.693783	-1.4396
0.698017	-1.27669		0.69795	-1.4141
0.70215	-1.27866		0.702117	-1.38822
0.70635	-1.26517		0.706283	-1.36441
0.710483	-1.23493		0.71045	-1.34592
0.714683	-1.19893		0.714617	-1.33509
0.718817	-1.17181		0.718783	-1.32995
0.723017	-1.16243		0.72295	-1.32396
0.72715	-1.1705		0.727117	-1.31035
0.73135	-1.18807		0.731283	-1.28904
0.735483	-1.20719		0.73545	-1.26636
0.739683	-1.22541		0.739617	-1.24784
0.743817	-1.23931		0.743783	-1.23612
0.748017	-1.23946		0.74795	-1.23301
0.75215	-1.22062		0.752117	-1.23882
0.75635	-1.19165		0.756283	-1.24724
0.760483	-1.16996		0.76045	-1.2422
0.764683	-1.16872		0.764617	-1.20982
0.768817	-1.189		0.768783	-1.15915
0.773017	-1.21903		0.77295	-1.11846
0.77715	-1.24053		0.777117	-1.10428
0.78135	-1.24131		0.781283	-1.10698
0.785483	-1.22353		0.78545	-1.11062
0.789683	-1.19837		0.789617	-1.11185
0.793817	-1.17701		0.793783	-1.11279
0.798017	-1.16857		0.79795	-1.10594
0.80215	-1.17603		0.802117	-1.08113
0.80635	-1.19095		0.806283	-1.04526
0.810483	-1.20076		0.81045	-1.01817
0.814683	-1.20058		0.814617	-1.00822
0.818817	-1.19377		0.818783	-1.00679
0.823017	-1.18635		0.82295	-1.00476
0.82715	-1.18353		0.827117	-0.99968
0.83135	-1.1879		0.831283	-0.98845
0.835483	-1.19933		0.83545	-0.96646
0.839683	-1.21554		0.839617	-0.93471
0.843817	-1.23249		0.843783	-0.90086
0.848017	-1.24556		0.84795	-0.87246
0.85215	-1.25097		0.852117	-0.85155
0.85635	-1.24667		0.856283	-0.83709
0.860483	-1.23304		0.86045	-0.82905
0.864683	-1.21503		0.864617	-0.82305
0.868817	-1.20146		0.868783	-0.80502
0.873017	-1.19794		0.87295	-0.76563
0.87715	-1.20202		0.877117	-0.71785
0.88135	-1.20792		0.881283	-0.68491
0.885483	-1.21384		0.88545	-0.67524
0.889683	-1.22127		0.889617	-0.6805
0.893817	-1.22916		0.893783	-0.68803
0.898017	-1.23154		0.89795	-0.68778
0.90215	-1.22178		0.902117	-0.67323
0.90635	-1.20106		0.906283	-0.63812
0.910483	-1.1811		0.91045	-0.58059
0.914683	-1.17482		0.914617	-0.51361
0.918817	-1.18429		0.918783	-0.45606
0.923017	-1.20089		0.92295	-0.41389
0.92715	-1.21641		0.927117	-0.38085
0.93135	-1.22761		0.931283	-0.3482
0.935483	-1.23183		0.93545	-0.30998
0.939683	-1.22721		0.939617	-0.26381
0.943817	-1.21608		0.943783	-0.20534
0.948017	-1.20294		0.94795	-0.12847
0.95215	-1.19128		0.952117	-0.03839
0.95635	-1.18449		0.956283	0.04534
0.960483	-1.18677		0.96045	0.10679
0.964683	-1.20082		0.964617	0.14708
0.968817	-1.22312		0.968783	0.17861
0.973017	-1.24302		0.97295	0.21307
0.97715	-1.24987		0.977117	0.2556
0.98135	-1.24119		0.981283	0.30699
0.985483	-1.22389		0.98545	0.3659
0.989683	-1.20727		0.989617	0.42433
0.993817	-1.19555		0.993783	0.46806
0.998017	-1.18825		0.99795	0.48922
1.00215	-1.18605		1.00212	0.49543
1.00635	-1.1915		1.00628	0.50123
1.01048	-1.20325		1.01045	0.51292
1.01468	-1.21523		1.01462	0.52887
1.01882	-1.22208		1.01878	0.55034
1.02302	-1.22271		1.02295	0.57727
1.02715	-1.22122		1.02712	0.59266
1.03135	-1.22623		1.03128	0.56391
1.03548	-1.25013		1.03545	0.45987
1.03968	-1.31106		1.03962	0.25389
1.04382	-1.43436		1.04378	-0.08881
1.04802	-1.65216		1.04795	-0.61492
1.05215	-2.007		1.05212	-1.37424
1.05635	-2.55476		1.05628	-2.41082
1.06048	-3.35378		1.06045	-3.76244
1.06468	-4.44986		1.06462	-5.4604
1.06882	-5.8721		1.06878	-7.5182
1.07302	-7.63452		1.07295	-9.92156
1.07715	-9.73596		1.07712	-12.6333
1.08135	-12.1588		1.08128	-15.6068
1.08548	-14.871		1.08545	-18.7974
1.08968	-17.8353		1.08962	-22.1661
1.09382	-21.0151		1.09378	-25.6812
1.09802	-24.3736		1.09795	-29.3233
1.10215	-27.876		1.10212	-33.0826
1.10635	-31.4976		1.10628	-36.9484
1.11048	-35.224		1.11045	-40.904
1.11468	-39.0456		1.11462	-44.9347
1.11882	-42.9539		1.11878	-49.0377
1.12302	-46.9425		1.12295	-53.2218
1.12715	-51.0105		1.12712	-57.499
1.13135	-55.1659		1.13128	-61.8903
1.13548	-59.4211		1.13545	-66.4476
1.13968	-63.7862		1.13962	-71.255
1.14382	-68.2627		1.14378	-76.4043
1.14802	-72.8469		1.14795	-81.9705
1.15215	-77.5451		1.15212	-87.9961
1.15635	-82.389		1.15628	-94.4715
1.16048	-87.435		1.16045	-101.316
1.16468	-92.7454		1.16462	-108.372
1.16882	-98.3522		1.16878	-115.418
1.17302	-104.214		1.17295	-122.203
1.17715	-110.201		1.17712	-128.49
1.18135	-116.113		1.18128	-134.085
1.18548	-121.731		1.18545	-138.867
1.18968	-126.86		1.18962	-142.79
1.19382	-131.366		1.19378	-145.882
1.19802	-135.182		1.19795	-148.217
1.20215	-138.305		1.20212	-149.896
1.20635	-140.776		1.20628	-151.028
1.21048	-142.664		1.21045	-151.726
1.21468	-144.048		1.21462	-152.09
1.21882	-145.004		1.21878	-152.197
1.22302	-145.595		1.22295	-152.098
1.22715	-145.874		1.22712	-151.819
1.23135	-145.883		1.23128	-151.374
1.23548	-145.652		1.23545	-150.775
1.23968	-145.21		1.23962	-150.025
1.24382	-144.585		1.24378	-149.133
1.24802	-143.804		1.24795	-148.12
1.25215	-142.898		1.25212	-147.013
1.25635	-141.907		1.25628	-145.824
1.26048	-140.864		1.26045	-144.543
1.26468	-139.798		1.26462	-143.143
1.26882	-138.726		1.26878	-141.592
1.27302	-137.646		1.27295	-139.842
1.27715	-136.544		1.27712	-137.702
1.28135	-135.393		1.28128	-134.241
1.28548	-134.155		1.28545	-126.598
1.28968	-132.782		1.28962	-109.097
1.29382	-131.234		1.29378	-74.1923
1.29802	-129.487		1.29795	-15.5265
1.30215	-127.53		1.30212	68.7033
1.30635	-125.364		1.30628	174.366
1.31048	-123.004		1.31045	292.687
1.31468	-120.474		1.31462	413.132
1.31882	-117.795		1.31878	526.301
1.32302	-114.986		1.32295	625.734
1.32715	-112.063		1.32712	708.363
1.33135	-109.043		1.33128	773.929
1.33548	-105.94		1.33545	823.957
1.33968	-102.753		1.33962	860.752
1.34382	-99.4811		1.34378	886.758
1.34802	-96.1315		1.34795	904.274
1.35215	-92.7218		1.35212	915.337
1.35635	-89.2705		1.35628	921.648
1.36048	-85.7896		1.36045	924.559
1.36468	-82.2813		1.36462	925.155
1.36882	-78.7461		1.36878	924.337
1.37302	-75.1896		1.37295	922.836
1.37715	-71.6167		1.37712	921.205
1.38135	-68.0287		1.38128	919.861
1.38548	-64.4305		1.38545	919.169
1.38968	-60.8311		1.38962	919.481
1.39382	-57.228		1.39378	921.198
1.39802	-53.5939		1.39795	925.06
1.40215	-49.8728		1.40212	932.739
1.40635	-45.9635		1.40628	947.388
1.41048	-41.659		1.41045	973.386
1.41468	-36.5358		1.41462	1014.79
1.41882	-29.8592		1.41878	1073.08
1.42302	-20.626		1.42295	1145.51
1.42715	-7.8219		1.42712	1225.01
1.43135	9.1714		1.43128	1301.62
1.43548	30.2091		1.43545	1364.96
1.43968	54.2583		1.43962	1406.66
1.44382	79.5947		1.44378	1422.02
1.44802	104.235		1.44795	1410.48
1.45215	126.434		1.45212	1375
1.45635	145.054		1.45628	1320.95
1.46048	159.69		1.46045	1254.81
1.46468	170.572		1.46462	1183
1.46882	178.329		1.46878	1110.86
1.47302	183.733		1.47295	1042.22
1.47715	187.495		1.47712	979.259
1.48135	190.163		1.48128	922.81
1.48548	192.107		1.48545	872.745
1.48968	193.554		1.48962	828.393
1.49382	194.614		1.49378	788.891
1.49802	195.305		1.49795	753.404
1.50215	195.583		1.50212	721.202
1.50635	195.377		1.50628	691.659
1.51048	194.585		1.51045	664.269
1.51468	193.047		1.51462	638.653
1.51882	190.546		1.51878	614.529
1.52302	186.842		1.52295	591.668
1.52715	181.729		1.52712	569.874
1.53135	175.075		1.53128	548.983
1.53548	166.876		1.53545	528.854
1.53968	157.305		1.53962	509.362
1.54382	146.724		1.54378	490.392
1.54802	135.635		1.54795	471.873
1.55215	124.594		1.55212	453.786
1.55635	114.125		1.55628	436.15
1.56048	104.65		1.56045	419
1.56468	96.4397		1.56462	402.381
1.56882	89.576		1.56878	386.344
1.57302	83.9535		1.57295	370.93
1.57715	79.3225		1.57712	356.142
1.58135	75.3567		1.58128	341.947
1.58548	71.718		1.58545	328.305
1.58968	68.1096		1.58962	315.189
1.59382	64.3135		1.59378	302.579
1.59802	60.2079		1.59795	290.458
1.60215	55.7632		1.60212	278.81
1.60635	51.0174		1.60628	267.63
1.61048	46.0359		1.61045	256.918
1.61468	40.8749		1.61462	246.652
1.61882	35.5514		1.61878	236.757
1.62302	30.0144		1.62295	227.1
1.62715	24.1247		1.62712	217.485
1.63135	17.6668		1.63128	207.669
1.63548	10.3975		1.63545	197.4
1.63968	2.1208		1.63962	186.476
1.64382	-7.23915		1.64378	174.823
1.64802	-17.6056		1.64795	162.561
1.65215	-28.7642		1.65212	150.002
1.65635	-40.4025		1.65628	137.629
1.66048	-52.1594		1.66045	126.036
1.66468	-63.6764		1.66462	115.84
1.66882	-74.6413		1.66878	107.555
1.67302	-84.8119		1.67295	101.482
1.67715	-94.0205		1.67712	97.624
1.68135	-102.174		1.68128	95.5851
1.68548	-109.251		1.68545	94.5062
1.68968	-115.293		1.68962	93.1039
1.69382	-120.391		1.69378	89.8815
1.69802	-124.66		1.69795	83.4651
1.70215	-128.234		1.70212	72.9532
1.70635	-131.243		1.70628	58.1643
1.71048	-133.811		1.71045	39.6893
1.71468	-136.046		1.71462	18.736
1.71882	-138.036		1.71878	-3.17536
1.72302	-139.848		1.72295	-24.5613
1.72715	-141.525		1.72712	-44.2462
1.73135	-143.091		1.73128	-61.4945
1.73548	-144.554		1.73545	-76.0163
1.73968	-145.917		1.73962	-87.8819
1.74382	-147.168		1.74378	-97.3869
1.74802	-148.288		1.74795	-104.919
1.75215	-149.259		1.75212	-110.864
1.75635	-150.064		1.75628	-115.556
1.76048	-150.693		1.76045	-119.271
1.76468	-151.133		1.76462	-122.227
1.76882	-151.371		1.76878	-124.577
1.77302	-151.391		1.77295	-126.426
1.77715	-151.183		1.77712	-127.846
1.78135	-150.738		1.78128	-128.897
1.78548	-150.049		1.78545	-129.628
1.78968	-149.115		1.78962	-130.076
1.79382	-147.941		1.79378	-130.262
1.79802	-146.536		1.79795	-130.21
1.80215	-144.908		1.80212	-129.947
1.80635	-143.063		1.80628	-129.501
1.81048	-141.009		1.81045	-128.884
1.81468	-138.755		1.81462	-128.097
1.81882	-136.315		1.81878	-127.138
1.82302	-133.706		1.82295	-126.01
1.82715	-130.942		1.82712	-124.719
1.83135	-128.038		1.83128	-123.274
1.83548	-125.004		1.83545	-121.685
1.83968	-121.849		1.83962	-119.959
1.84382	-118.582		1.84378	-118.096
1.84802	-115.212		1.84795	-116.091
1.85215	-111.749		1.85212	-113.941
1.85635	-108.206		1.85628	-111.654
1.86048	-104.6		1.86045	-109.231
1.86468	-100.949		1.86462	-106.667
1.86882	-97.2668		1.86878	-103.961
1.87302	-93.559		1.87295	-101.124
1.87715	-89.8297		1.87712	-98.1751
1.88135	-86.0872		1.88128	-95.1282
1.88548	-82.3457		1.88545	-91.9847
1.88968	-78.6205		1.88962	-88.7402
1.89382	-74.9237		1.89378	-85.3932
1.89802	-71.266		1.89795	-81.9487
1.90215	-67.658		1.90212	-78.4184
1.90635	-64.1093		1.90628	-74.8237
1.91048	-60.6261		1.91045	-71.1905
1.91468	-57.212		1.91462	-67.5321
1.91882	-53.871		1.91878	-63.8441
1.92302	-50.6105		1.92295	-60.1177
1.92715	-47.4409		1.92712	-56.3539
1.93135	-44.3736		1.93128	-52.5662
1.93548	-41.422		1.93545	-48.7716
1.93968	-38.5999		1.93962	-44.9855
1.94382	-35.9142		1.94378	-41.228
1.94802	-33.3633		1.94795	-37.5229
1.95215	-30.9436		1.95212	-33.884
1.95635	-28.6518		1.95628	-30.3093
1.96048	-26.4841		1.96045	-26.7931
1.96468	-24.4345		1.96462	-23.3381
1.96882	-22.4978		1.96878	-19.9517
1.97302	-20.6735		1.97295	-16.6389
1.97715	-18.9649		1.97712	-13.4065
1.98135	-17.3707		1.98128	-10.2714
1.98548	-15.8827		1.98545	-7.25631
1.98968	-14.4912		1.98962	-4.37476
1.99382	-13.1885		1.99378	-1.62457
1.99802	-11.9676		1.99795	1.00511
2.00215	-10.8229		2.00212	3.52502
2.00635	-9.75228		2.00628	5.94355
2.01048	-8.75757		2.01045	8.26911
2.01468	-7.84203		2.01462	10.506
2.01882	-7.0055		2.01878	12.6462
2.02302	-6.24311		2.02295	14.676
2.02715	-5.54824		2.02712	16.59
2.03135	-4.91566		2.03128	18.3938
2.03548	-4.34224		2.03545	20.0959
2.03968	-3.82498		2.03962	21.7024
2.04382	-3.36114		2.04378	23.2181
2.04802	-2.95193		2.04795	24.6506
2.05215	-2.60066		2.05212	26.0065
2.05635	-2.30435		2.05628	27.2811
2.06048	-2.05181		2.06045	28.4637
2.06468	-1.83153		2.06462	29.5526
2.06882	-1.64067		2.06878	30.5563
2.07302	-1.48575		2.07295	31.4833
2.07715	-1.37219		2.07712	32.3379
2.08135	-1.29315		2.08128	33.1281
2.08548	-1.23299		2.08545	33.865
2.08968	-1.18065		2.08962	34.5448
2.09382	-1.13535		2.09378	35.1429
2.09802	-1.10046		2.09795	35.6317
2.10215	-1.07626		2.10212	35.9971
2.10635	-1.05874		2.10628	36.2362
2.11048	-1.04278		2.11045	36.3485
2.11468	-1.02652		2.11462	36.3355
2.11882	-1.01406		2.11878	36.2081
2.12302	-1.01049		2.12295	35.9835
2.12715	-1.01291		2.12712	35.6754
2.13135	-1.01185		2.13128	35.2949
2.13548	-1.00286		2.13545	34.8629
2.13968	-0.99215		2.13962	34.415
2.14382	-0.98878		2.14378	33.9938
2.14802	-0.99355		2.14795	33.6355
2.15215	-1.00055		2.15212	33.3629
2.15635	-1.00905		2.15628	33.1902
2.16048	-1.02486		2.16045	33.123
2.16468	-1.04758		2.16462	33.1489
2.16882	-1.06425		2.16878	33.2441
2.17302	-1.0613		2.17295	33.3948
2.17715	-1.04009		2.17712	33.6044
2.18135	-1.01515		2.18128	33.8833
2.18548	-0.99871		2.18545	34.2364
2.18968	-0.99416		2.18962	34.6576
2.19382	-1.00136		2.19378	35.1387
2.19802	-1.01688		2.19795	35.6761
2.20215	-1.03001		2.20212	36.2599
2.20635	-1.02895		2.20628	36.8692
2.21048	-1.01201		2.21045	37.489
2.21468	-0.98985		2.21462	38.1238
2.21882	-0.97624		2.21878	38.7913
2.22302	-0.97564		2.22295	39.507
2.22715	-0.98205		2.22712	40.2776
2.23135	-0.99176		2.23128	41.1046
2.23548	-1.00765		2.23545	41.9865
2.23968	-1.02748		2.23962	42.9146
2.24382	-1.04077		2.24378	43.8761
2.24802	-1.04199		2.24795	44.8668
2.25215	-1.03741		2.25212	45.892
2.25635	-1.0373		2.25628	46.9599
2.26048	-1.04755		2.26045	48.0782
2.26468	-1.06667		2.26462	49.2575
2.26882	-1.08845		2.26878	50.5123
2.27302	-1.10862		2.27295	51.855
2.27715	-1.12644		2.27712	53.2885
2.28135	-1.14148		2.28128	54.8057
2.28548	-1.15377		2.28545	56.3977
2.28968	-1.16582		2.28962	58.0641
2.29382	-1.18206		2.29378	59.8162
2.29802	-1.20559		2.29795	61.6698
2.30215	-1.236		2.30212	63.6389
2.30635	-1.27051		2.30628	65.7328
2.31048	-1.30563		2.31045	67.9537
2.31468	-1.33914		2.31462	70.2985
2.31882	-1.37179		2.31878	72.7691
2.32302	-1.40484		2.32295	75.3791
2.32715	-1.43684		2.32712	78.1553
2.33135	-1.46487		2.33128	81.1337
2.33548	-1.48818		2.33545	84.3497
2.33968	-1.50899		2.33962	87.8354
2.34382	-1.5308		2.34378	91.6235
2.34802	-1.55714		2.34795	95.7549
2.35215	-1.59082		2.35212	100.293
2.35635	-1.63393		2.35628	105.343
2.36048	-1.68757		2.36045	111.059
2.36468	-1.74657		2.36462	117.669
2.36882	-1.79554		2.36878	125.52
2.37302	-1.81946		2.37295	135.208
2.37715	-1.82194		2.37712	147.998
2.38135	-1.82402		2.38128	167.067
2.38548	-1.84258		2.38545	199.548
2.38968	-1.87829		2.38962	257.243
2.39382	-1.9247		2.39378	353.125
2.39802	-1.97754		2.39795	493.903
2.40215	-2.03		2.40212	672.802
2.40635	-2.06829		2.40628	867.338
2.41048	-2.08296		2.41045	1044.41
2.41468	-2.08199		2.41462	1170.8
2.41882	-2.08512		2.41878	1223.79
2.42302	-2.10642		2.42295	1197.09
2.42715	-2.14602		2.42712	1100.74
2.43135	-2.19558		2.43128	956.255
2.43548	-2.24395		2.43545	789.588
2.43968	-2.27949		2.43962	624.311
2.44382	-2.29702		2.44378	477.152
2.44802	-2.30358		2.44795	356.632
2.45215	-2.31284		2.45212	264.231
2.45635	-2.33373		2.45628	196.849
2.46048	-2.36532		2.46045	149.33
2.46468	-2.40118		2.46462	116.345
2.46882	-2.43644		2.46878	93.4267
2.47302	-2.46976		2.47295	77.2884
2.47715	-2.50029		2.47712	65.7022
2.48135	-2.5264		2.48128	57.2211
2.48548	-2.54978		2.48545	50.9107
2.48968	-2.57689		2.48962	46.1479
2.49382	-2.61195		2.49378	42.4873
2.49802	-2.64971		2.49795	39.5977
2.50215	-2.67817		2.50212	37.2438
2.50635	-2.68779		2.50628	35.2704
2.51048	-2.67725		2.51045	33.5718
2.51468	-2.65433		2.51462	32.0686
2.51882	-2.63257		2.51878	30.7013
2.52302	-2.62406		2.52295	29.4339
2.52715	-2.63335		2.52712	28.2476
2.53135	-2.65551		2.53128	27.124
2.53548	-2.68032		2.53545	26.0409
2.53968	-2.70057		2.53962	24.9816
2.54382	-2.71607		2.54378	23.9421
2.54802	-2.72952		2.54795	22.9265
2.55215	-2.73725		2.55212	21.9378
2.55635	-2.72748		2.55628	20.9717
2.56048	-2.69108		2.56045	20.0159
2.56468	-2.62792		2.56462	19.0478
2.56882	-2.54089		2.56878	18.0278
2.57302	-2.43011		2.57295	16.9059
2.57715	-2.29366		2.57712	15.6504
2.58135	-2.13115		2.58128	14.2667
2.58548	-1.94624		2.58545	12.7916
2.58968	-1.74358		2.58962	11.2752
2.59382	-1.5273		2.59378	9.76443
2.59802	-1.30905		2.59795	8.29922
2.60215	-1.10988		2.60212	6.91449
2.60635	-0.94549		2.60628	5.63392
2.61048	-0.81496		2.61045	4.46446
2.61468	-0.70912		2.61462	3.40385
2.61882	-0.62342		2.61878	2.44884
2.62302	-0.55434		2.62295	1.59469
2.62715	-0.49348		2.62712	0.83341
2.63135	-0.43577		2.63128	0.15428
2.63548	-0.38292		2.63545	-0.45345
2.63968	-0.33872		2.63962	-0.99939
2.64382	-0.3073		2.64378	-1.49665
2.64802	-0.28728		2.64795	-1.9618
2.65215	-0.27047		2.65212	-2.40215
2.65635	-0.25341		2.65628	-2.80874
2.66048	-0.23752		2.66045	-3.1679
2.66468	-0.22104		2.66462	-3.4767
2.66882	-0.20288		2.66878	-3.74352
2.67302	-0.18627		2.67295	-3.97712
2.67715	-0.17456		2.67712	-4.18303
2.68135	-0.16989		2.68128	-4.36784
2.68548	-0.17323		2.68545	-4.53715
2.68968	-0.18204		2.68962	-4.6927
2.69382	-0.19066		2.69378	-4.83402
2.69802	-0.19422		2.69795	-4.95829
2.70215	-0.19132		2.70212	-5.06144
2.70635	-0.18535		2.70628	-5.14251
2.71048	-0.18337		2.71045	-5.20398
2.71468	-0.19064		2.71462	-5.24932
2.71882	-0.2067		2.71878	-5.28207
2.72302	-0.2274		2.72295	-5.30449
2.72715	-0.25026		2.72712	-5.31747
2.73135	-0.27629		2.73128	-5.323
2.73548	-0.3038		2.73545	-5.3236
2.73968	-0.3258		2.73962	-5.31559
2.74382	-0.34007		2.74378	-5.28639
2.74802	-0.35419		2.74795	-5.22787
2.75215	-0.37311		2.75212	-5.15451
2.75635	-0.39121		2.75628	-5.09591
2.76048	-0.40361		2.76045	-5.06688
2.76468	-0.41462		2.76462	-5.05458
2.76882	-0.42978		2.76878	-5.03577
2.77302	-0.44708		2.77295	-4.99856
2.77715	-0.45953		2.77712	-4.94731
2.78135	-0.46537		2.78128	-4.89178
2.78548	-0.47206		2.78545	-4.83572
2.78968	-0.48771		2.78962	-4.77689
2.79382	-0.51125		2.79378	-4.71416
2.79802	-0.53443		2.79795	-4.65211
2.80215	-0.5526		2.80212	-4.59891
2.80635	-0.56844		2.80628	-4.55715
2.81048	-0.58555		2.81045	-4.51759
2.81468	-0.60407		2.81462	-4.46604
2.81882	-0.62181		2.81878	-4.39631
2.82302	-0.63751		2.82295	-4.31614
2.82715	-0.65241		2.82712	-4.24072
2.83135	-0.66744		2.83128	-4.17834
2.83548	-0.68217		2.83545	-4.12508
2.83968	-0.69724		2.83962	-4.07418
2.84382	-0.71314		2.84378	-4.02064
2.84802	-0.7275		2.84795	-3.95829
2.85215	-0.73866		2.85212	-3.88561
2.85635	-0.75138		2.85628	-3.80916
2.86048	-0.77215		2.86045	-3.73426
2.86468	-0.7985		2.86462	-3.66081
2.86882	-0.82121		2.86878	-3.58881
2.87302	-0.83567		2.87295	-3.51987
2.87715	-0.84399		2.87712	-3.45507
2.88135	-0.85003		2.88128	-3.39459
2.88548	-0.85578		2.88545	-3.33777
2.88968	-0.86059		2.88962	-3.28245
2.89382	-0.86486		2.89378	-3.22753
2.89802	-0.87135		2.89795	-3.1773
2.90215	-0.88056		2.90212	-3.13713
2.90635	-0.89158		2.90628	-3.10376
2.91048	-0.9068		2.91045	-3.06581
2.91468	-0.9265		2.91462	-3.01436
2.91882	-0.94341		2.91878	-2.95118
2.92302	-0.94989		2.92295	-2.88534
2.92715	-0.94665		2.92712	-2.82034
2.93135	-0.94163		2.93128	-2.75345
2.93548	-0.94158		2.93545	-2.69007
2.93968	-0.9477		2.93962	-2.64143
2.94382	-0.95939		2.94378	-2.60712
2.94802	-0.97637		2.94795	-2.57488
2.95215	-0.99529		2.95212	-2.53651
2.95635	-1.0094		2.95628	-2.49507
2.96048	-1.01538		2.96045	-2.45637
2.96468	-1.01756		2.96462	-2.41696
2.96882	-1.01995		2.96878	-2.36653
2.97302	-1.01964		2.97295	-2.30274
2.97715	-1.01562		2.97712	-2.23532
2.98135	-1.01568		2.98128	-2.17552
2.98548	-1.02681		2.98545	-2.12901
2.98968	-1.04478		2.98962	-2.09542
2.99382	-1.05816		2.99378	-2.06899
2.99802	-1.05966		2.99795	-2.04326
3.00215	-1.0511		3.00212	-2.01452
3.00635	-1.0404		3.00628	-1.98101
3.01048	-1.0352		3.01045	-1.94449
3.01468	-1.03748		3.01462	-1.91024
3.01882	-1.04535		3.01878	-1.88172
3.02302	-1.05788		3.02295	-1.85799
3.02715	-1.07193		3.02712	-1.83479
3.03135	-1.07966		3.03128	-1.80622
3.03548	-1.07655		3.03545	-1.76655
3.03968	-1.0683		3.03962	-1.70977
3.04382	-1.06558		3.04378	-1.63374
3.04802	-1.07204		3.04795	-1.55224
3.05215	-1.08107		3.05212	-1.49081
3.05635	-1.08538		3.05628	-1.46258
3.06048	-1.08479		3.06045	-1.45902
3.06468	-1.08282		3.06462	-1.46463
3.06882	-1.08077		3.06878	-1.47011
3.07302	-1.07933		3.07295	-1.47074
3.07715	-1.08089		3.07712	-1.46068
3.08135	-1.08715		3.08128	-1.43617
3.08548	-1.0982		3.08545	-1.40031
3.08968	-1.11175		3.08962	-1.35887
3.09382	-1.12398		3.09378	-1.31586
3.09802	-1.13364		3.09795	-1.27391
3.10215	-1.13887		3.10212	-1.23544
3.10635	-1.13592		3.10628	-1.20295
3.11048	-1.12757		3.11045	-1.17701
3.11468	-1.12096		3.11462	-1.15543
3.11882	-1.11696		3.11878	-1.13783
3.12302	-1.11365		3.12295	-1.1275
3.12715	-1.11398		3.12712	-1.12556
3.13135	-1.11978		3.13128	-1.12762
3.13548	-1.12722		3.13545	-1.12794
3.13968	-1.13411		3.13962	-1.12294
3.14382	-1.14169		3.14378	-1.10948
3.14802	-1.14912		3.14795	-1.08175
3.15215	-1.15328		3.15212	-1.03493
3.15635	-1.15209		3.15628	-0.97609
3.16048	-1.14651		3.16045	-0.92564
3.16468	-1.13958		3.16462	-0.90181
3.16882	-1.13366		3.16878	-0.90633
3.17302	-1.12874		3.17295	-0.92507
3.17715	-1.12376		3.17712	-0.93849
3.18135	-1.12052		3.18128	-0.93212
3.18548	-1.12157		3.18545	-0.90272
3.18968	-1.12426		3.18962	-0.8604
3.19382	-1.12375		3.19378	-0.82482
3.19802	-1.1199		3.19795	-0.81153
3.20215	-1.1166		3.20212	-0.81814
3.20635	-1.11671		3.20628	-0.82843
3.21048	-1.11964		3.21048	-0.82939
3.21468	-1.12161		3.21462	-0.82042
3.21882	-1.11812		3.21878	-0.80784
3.22302	-1.10902		3.22295	-0.79492
3.22715	-1.10092		3.22712	-0.78057
3.23135	-1.10194		3.23128	-0.76524
3.23548	-1.11323		3.23545	-0.75164
3.23968	-1.12734		3.23962	-0.7414
3.24382	-1.13495		3.24378	-0.73564
3.24802	-1.13154		3.24795	-0.737
3.25215	-1.11849		3.25212	-0.74564
3.25635	-1.10184		3.25628	-0.75419
3.26048	-1.09072		3.26045	-0.75186
3.26468	-1.09007		3.26462	-0.73275
3.26882	-1.09691		3.26878	-0.70111
3.27302	-1.10717		3.27295	-0.67224
3.27715	-1.11751		3.27712	-0.66256
3.28135	-1.12439		3.28128	-0.67399
3.28548	-1.12878		3.28545	-0.69423
3.28968	-1.13192		3.28962	-0.71188
3.29382	-1.13076		3.29378	-0.71975
3.29802	-1.12618		3.29795	-0.70997
3.30215	-1.12392		3.30212	-0.68386
3.30635	-1.12543		3.30628	-0.65835
3.31048	-1.12776		3.31045	-0.64793
3.31468	-1.12906		3.31462	-0.65079
3.31882	-1.13001		3.31878	-0.6588
3.32302	-1.13203		3.32295	-0.66823
3.32715	-1.13371		3.32712	-0.67569
3.33135	-1.13211		3.33128	-0.67387
3.33548	-1.12892		3.33545	-0.65875
3.33968	-1.1287		3.33962	-0.6363
3.34382	-1.13091		3.34378	-0.61812
3.34802	-1.13225		3.34795	-0.611
3.35215	-1.13361		3.35212	-0.61316
3.35635	-1.13624		3.35628	-0.62058
3.36048	-1.13717		3.36045	-0.62892
3.36468	-1.13527		3.36462	-0.63009
3.36882	-1.13587		3.36878	-0.61695
3.37302	-1.14315		3.37295	-0.59132
3.37715	-1.15231		3.37712	-0.56419
3.38135	-1.1552		3.38128	-0.54888
3.38548	-1.1513		3.38545	-0.55124
3.38968	-1.14805		3.38962	-0.56501
3.39382	-1.14991		3.39378	-0.57924
3.39802	-1.1521		3.39795	-0.58854
3.40215	-1.14804		3.40212	-0.59113
3.40635	-1.13935		3.40628	-0.58201
3.41048	-1.13469		3.41045	-0.5587
3.41468	-1.13972		3.41462	-0.52978
3.41882	-1.15253		3.41878	-0.50787
3.42302	-1.16651		3.42295	-0.49965
3.42715	-1.17468		3.42712	-0.5069
3.43135	-1.17388		3.43128	-0.52666
3.43548	-1.16438		3.43545	-0.54746
3.43968	-1.14935		3.43962	-0.55441
3.44382	-1.13623		3.44378	-0.53941
3.44802	-1.13127		3.44795	-0.50625
3.45215	-1.13415		3.45212	-0.46829
3.45635	-1.14052		3.45628	-0.43974
3.46048	-1.14552		3.46045	-0.42853
3.46468	-1.14856		3.46462	-0.43612
3.46882	-1.15424		3.46878	-0.45731
3.47302	-1.16256		3.47295	-0.47952
3.47715	-1.16596		3.47712	-0.48869
3.48135	-1.16078		3.48128	-0.47939
3.48548	-1.15227		3.48545	-0.45952
3.48968	-1.14706		3.48962	-0.44247
3.49382	-1.1461		3.49378	-0.43393
3.49802	-1.1462		3.49795	-0.43108
3.50215	-1.14592		3.50212	-0.43191
3.50635	-1.14583		3.50628	-0.4374
3.51048	-1.14682		3.51045	-0.44385
3.51468	-1.15159		3.51462	-0.43914
3.51882	-1.16159		3.51878	-0.41585
3.52302	-1.17321		3.52295	-0.38595
3.52715	-1.18228		3.52712	-0.36959
3.53135	-1.1873		3.53128	-0.37436
3.53548	-1.18628		3.53545	-0.39414
3.53968	-1.17791		3.53962	-0.41802
3.54382	-1.16616		3.54378	-0.43709
3.54802	-1.15727		3.54795	-0.448
3.55215	-1.15297		3.55212	-0.44814
3.55635	-1.1519		3.55628	-0.43284
3.56048	-1.1534		3.56045	-0.40533
3.56468	-1.15639		3.56462	-0.38217
3.56882	-1.16039		3.56878	-0.37937
3.57302	-1.16723		3.57295	-0.39655
3.57715	-1.17517		3.57712	-0.42031
3.58135	-1.17677		3.58128	-0.43936
3.58548	-1.16783		3.58545	-0.44985
3.58968	-1.15524		3.58962	-0.44678
3.59382	-1.15168		3.59378	-0.42329
3.59802	-1.16117		3.59795	-0.3869
3.60215	-1.17542		3.60212	-0.36246
3.60635	-1.18574		3.60628	-0.36676
3.61048	-1.19068		3.61045	-0.38972
3.61468	-1.1917		3.61462	-0.40892
3.61882	-1.18784		3.61878	-0.41471
3.62302	-1.17742		3.62295	-0.4128
3.62715	-1.16373		3.62712	-0.40702
3.63135	-1.154		3.63128	-0.39406
3.63548	-1.15246		3.63545	-0.37609
3.63968	-1.15821		3.63962	-0.36493
3.64382	-1.16779		3.64378	-0.37049
3.64802	-1.17842		3.64795	-0.39016
3.65215	-1.18716		3.65212	-0.41285
3.65635	-1.18882		3.65628	-0.43004
3.66048	-1.18065		3.66045	-0.43745
3.66468	-1.16731		3.66462	-0.43102
3.66882	-1.15718		3.66878	-0.41026
3.67302	-1.15571		3.67295	-0.38576
3.67715	-1.16295		3.67712	-0.37599
3.68135	-1.17514		3.68128	-0.3898
3.68548	-1.18856		3.68545	-0.41652
3.68968	-1.20163		3.68962	-0.4392
3.69382	-1.21255		3.69378	-0.45039
3.69802	-1.21714		3.69795	-0.44771
3.70215	-1.2115		3.70212	-0.42695
3.70635	-1.19623		3.70628	-0.39381
3.71048	-1.17684		3.71045	-0.36912
3.71468	-1.16095		3.71462	-0.36726
3.71882	-1.15355		3.71878	-0.38195
3.72302	-1.15355		3.72295	-0.4008
3.72715	-1.15577		3.72712	-0.41877
3.73135	-1.15649		3.73128	-0.43265
3.73548	-1.15694		3.73545	-0.435
3.73968	-1.16129		3.73962	-0.42137
3.74382	-1.17048		3.74378	-0.39995
3.74802	-1.18076		3.74795	-0.38512
3.75215	-1.1897		3.75212	-0.38166
3.75635	-1.19907		3.75628	-0.38556
3.76048	-1.20864		3.76045	-0.39497
3.76468	-1.21313		3.76462	-0.40739
3.76882	-1.20836		3.76878	-0.41409
3.77302	-1.19797		3.77295	-0.4074
3.77715	-1.192		3.77712	-0.39039
3.78135	-1.19496		3.78128	-0.37771
3.78548	-1.19957		3.78545	-0.38372
3.78968	-1.19765		3.78962	-0.40679
3.79382	-1.18973		3.79378	-0.43031
3.79802	-1.18108		3.79795	-0.43989
3.80215	-1.17474		3.80212	-0.43548
3.80635	-1.17204		3.80628	-0.42619
3.81048	-1.17365		3.81045	-0.41418
3.81468	-1.1764		3.81462	-0.39187
3.81882	-1.17548		3.81878	-0.35886
3.82302	-1.1705		3.82295	-0.33045
3.82715	-1.1671		3.82712	-0.32418
3.83135	-1.17395		3.83128	-0.34271
3.83548	-1.193		3.83545	-0.37152
3.83968	-1.21263		3.83962	-0.39262
3.84382	-1.21784		3.84378	-0.39888
3.84802	-1.20615		3.84795	-0.394
3.85215	-1.18835		3.85212	-0.38459
3.85635	-1.17549		3.85628	-0.37708
3.86048	-1.17008		3.86045	-0.37465
3.86468	-1.16978		3.86462	-0.37371
3.86882	-1.17271		3.86878	-0.37144
3.87302	-1.17578		3.87295	-0.37288
3.87715	-1.17462		3.87712	-0.38227
3.88135	-1.1691		3.88128	-0.39147
3.88548	-1.16376		3.88545	-0.38633
3.88968	-1.16152		3.88962	-0.36612
3.89382	-1.16133		3.89378	-0.346
3.89802	-1.16266		3.89795	-0.3385
3.90215	-1.16893		3.90212	-0.34316
3.90635	-1.18198		3.90628	-0.35061
3.91048	-1.19406		3.91045	-0.35137
3.91468	-1.19279		3.91462	-0.3429
3.91882	-1.17573		3.91878	-0.32541
3.92302	-1.15434		3.92295	-0.29946
3.92715	-1.14234		3.92712	-0.27381
3.93135	-1.14411		3.93128	-0.26013
3.93548	-1.15508		3.93545	-0.25891
3.93968	-1.16725		3.93962	-0.26299
3.94382	-1.17222		3.94378	-0.26886
3.94802	-1.16457		3.94795	-0.27646
3.95215	-1.1459		3.95212	-0.28314
3.95635	-1.12341		3.95628	-0.28134
3.96048	-1.1036		3.96045	-0.26542
3.96468	-1.08866		3.96462	-0.24248
3.96882	-1.0779		3.96878	-0.22687
3.97302	-1.07013		3.97295	-0.22377
3.97715	-1.06506		3.97712	-0.22652
3.98135	-1.06447		3.98128	-0.22631
3.98548	-1.07058		3.98545	-0.22093
3.98968	-1.0809		3.98962	-0.21136
3.99382	-1.088		3.99378	-0.19164
3.99802	-1.08527		3.99795	-0.15556
4.00215	-1.06971		4.00212	-0.11262
4.00635	-1.04338		4.00628	-0.08182
4.01048	-1.01521		4.01045	-0.0723
4.01468	-0.99654		4.01462	-0.07806
4.01882	-0.99123		4.01878	-0.08734
4.02302	-0.99234		4.02295	-0.09216
4.02715	-0.99036		4.02712	-0.08781
4.03135	-0.98187		4.03128	-0.0699
4.03548	-0.96985		4.03545	-0.03835
4.03968	-0.95816		4.03962	-0.00114
4.04382	-0.94668		4.04378	0.02997
4.04802	-0.93196		4.04795	0.04863
4.05215	-0.91181		4.05212	0.05878
4.05635	-0.88719		4.05628	0.06863
4.06048	-0.85958		4.06045	0.08235
4.06468	-0.8306		4.06462	0.10131
4.06882	-0.80495		4.06878	0.12923
4.07302	-0.78927		4.07295	0.17135
4.07715	-0.78542		4.07712	0.2246
4.08135	-0.78767		4.08128	0.27239
4.08548	-0.78738		4.08545	0.29948
4.08968	-0.7789		4.08962	0.30866
4.09382	-0.76219		4.09378	0.31359
4.09802	-0.74076		4.09795	0.32393
4.10215	-0.71958		4.10212	0.34563
4.10635	-0.70583		4.10628	0.38087
4.11048	-0.70486		4.11045	0.41922
4.11468	-0.71487		4.11462	0.44516
4.11882	-0.72808		4.11878	0.45575
4.12302	-0.73524		4.12295	0.46052
4.12715	-0.73021		4.12712	0.4713
4.13135	-0.71154		4.13128	0.49543
4.13548	-0.68165		4.13545	0.53307
4.13968	-0.64831		4.13962	0.58297
4.14382	-0.62308		4.14378	0.64348
4.14802	-0.612		4.14795	0.70257
4.15215	-0.60893		4.15212	0.74394
4.15635	-0.60293		4.15628	0.76387
4.16048	-0.58964		4.16045	0.76943
4.16468	-0.57415		4.16462	0.77056
4.16882	-0.5648		4.16878	0.7796
4.17302	-0.56359		4.17295	0.80478
4.17715	-0.56544		4.17712	0.84382
4.18135	-0.56514		4.18128	0.8899
4.18548	-0.55998		4.18545	0.93752
4.18968	-0.55096		4.18962	0.98165
4.19382	-0.54313		4.19378	1.019
4.19802	-0.53864		4.19795	1.04975
4.20215	-0.53409		4.20212	1.07646
4.20635	-0.52703		4.20628	1.10343
4.21048	-0.51787		4.21045	1.13581
4.21468	-0.50793		4.21462	1.17684
4.21882	-0.49947		4.21878	1.22416
4.22302	-0.49452		4.22295	1.26758
4.22715	-0.49335		4.22712	1.29601
4.23135	-0.49661		4.23128	1.30866
4.23548	-0.50807		4.23545	1.31408
4.23968	-0.52831		4.23962	1.32117
4.24382	-0.54783		4.24378	1.33639
4.24802	-0.55516		4.24795	1.36328
4.25215	-0.54965		4.25212	1.40147
4.25635	-0.54092		4.25628	1.44815
4.26048	-0.53699		4.26045	1.49791
4.26468	-0.53788		4.26462	1.54337
4.26882	-0.54202		4.26878	1.57854
4.27302	-0.5509		4.27295	1.60003
4.27715	-0.5629		4.27712	1.60857
4.28135	-0.57144		4.28128	1.61068
4.28548	-0.57325		4.28545	1.61678
4.28968	-0.57131		4.28962	1.63675
4.29382	-0.57121		4.29378	1.67353
4.29802	-0.57743		4.29795	1.71993
4.30215	-0.58785		4.30212	1.76438
4.30635	-0.59628		4.30628	1.7986
4.31048	-0.60187		4.31045	1.82017
4.31468	-0.60806		4.31462	1.83254
4.31882	-0.61558		4.31878	1.84577
4.32302	-0.62305		4.32295	1.87385
4.32715	-0.63123		4.32712	1.92187
4.33135	-0.64291		4.33128	1.97511
4.33548	-0.65766		4.33545	2.01178
4.33968	-0.67074		4.33962	2.02576
4.34382	-0.67913		4.34378	2.03047
4.34802	-0.68478		4.34795	2.04301
4.35215	-0.6915		4.35212	2.06817
4.35635	-0.70033		4.35628	2.09924
4.36048	-0.70947		4.36045	2.13217
4.36468	-0.71969		4.36462	2.1686
4.36882	-0.73647		4.36878	2.20569
4.37302	-0.76189		4.37295	2.2372
4.37715	-0.78862		4.37712	2.26368
4.38135	-0.8073		4.38128	2.28962
4.38548	-0.81539		4.38545	2.31451
4.38968	-0.81644		4.38962	2.33453
4.39382	-0.81572		4.39378	2.34917
4.39802	-0.81783		4.39795	2.36597
4.40215	-0.82602		4.40212	2.39826
4.40635	-0.84092		4.40628	2.45023
4.41048	-0.85969		4.41045	2.5069
4.41468	-0.87835		4.41462	2.5476
4.41882	-0.89629		4.41878	2.56595
4.42302	-0.91684		4.42295	2.57341
4.42715	-0.94155		4.42712	2.58716
4.43135	-0.96543		4.43128	2.61607
4.43548	-0.98268		4.43545	2.65762
4.43968	-0.99412		4.43962	2.70491
4.44382	-1.00462		4.44378	2.75199
4.44802	-1.01696		4.44795	2.79436
4.45215	-1.03128		4.45212	2.82842
4.45635	-1.04787		4.45628	2.85159
4.46048	-1.0677		4.46045	2.86362
4.46468	-1.08956		4.46462	2.86905
4.46882	-1.10926		4.46878	2.87971
4.47302	-1.12372		4.47295	2.91122
4.47715	-1.13473		4.47712	2.97096
4.48135	-1.14805		4.48128	3.04798
4.48548	-1.16847		4.48545	3.11806
4.48968	-1.1956		4.48962	3.16143
4.49382	-1.22305		4.49378	3.1744
4.49802	-1.24353		4.49795	3.16695
4.50215	-1.25508		4.50212	3.15798
4.50635	-1.2607		4.50628	3.17144
4.51048	-1.26605		4.51045	3.22207
4.51468	-1.27738		4.51462	3.29854
4.51882	-1.29741		4.51878	3.37047
4.52302	-1.32438		4.52295	3.41532
4.52715	-1.35531		4.52712	3.43297
4.53135	-1.38767		4.53128	3.43764
4.53548	-1.41792		4.53545	3.44563
4.53968	-1.44019		4.53962	3.47052
4.54382	-1.45078		4.54378	3.5212
4.54802	-1.45524		4.54795	3.5952
4.55215	-1.46448		4.55212	3.67339
4.55635	-1.48268		4.55628	3.7316
4.56048	-1.50437		4.56045	3.75987
4.56468	-1.52415		4.56462	3.76571
4.56882	-1.54391		4.56878	3.76254
4.57302	-1.56603		4.57295	3.76028
4.57715	-1.58538		4.57712	3.76664
4.58135	-1.59566		4.58128	3.79047
4.58548	-1.59953		4.58545	3.83622
4.58968	-1.60548		4.58962	3.89705
4.59382	-1.61761		4.59378	3.95928
4.59802	-1.63348		4.59795	4.0132
4.60215	-1.64872		4.60212	4.05663
4.60635	-1.6613		4.60628	4.0918
4.61048	-1.67241		4.61045	4.12212
4.61468	-1.68377		4.61462	4.15111
4.61882	-1.69741		4.61878	4.18387
4.62302	-1.7152		4.62295	4.22539
4.62715	-1.73491		4.62712	4.27131
4.63135	-1.75021		4.63128	4.30719
4.63548	-1.75717		4.63545	4.32457
4.63968	-1.75791		4.63962	4.33187
4.64382	-1.75567		4.64378	4.34519
4.64802	-1.74983		4.64795	4.37187
4.65215	-1.73971		4.65212	4.40689
4.65635	-1.73073		4.65628	4.44284
4.66048	-1.72977		4.66045	4.47814
4.66468	-1.7382		4.66462	4.51532
4.66882	-1.75383		4.66878	4.555
4.67302	-1.77159		4.67295	4.5932
4.67715	-1.78433		4.67712	4.62332
4.68135	-1.78866		4.68128	4.64233
4.68548	-1.78411		4.68545	4.65608
4.68968	-1.7714		4.68962	4.67536
4.69382	-1.75742		4.69378	4.70548
4.69802	-1.7505		4.69795	4.74048
4.70215	-1.75015		4.70212	4.77032
4.70635	-1.75072		4.70628	4.79262
4.71048	-1.74874		4.71045	4.81251
4.71468	-1.74284		4.71462	4.83314
4.71882	-1.73366		4.71878	4.85106
4.72302	-1.72279		4.72295	4.86327
4.72715	-1.71109		4.72712	4.87882
4.73135	-1.70033		4.73128	4.91249
4.73548	-1.69281		4.73545	4.96158
4.73968	-1.68665		4.73962	5.00279
4.74382	-1.67551		4.74378	5.01879
4.74802	-1.65569		4.74795	5.01671
4.75215	-1.63138		4.75212	5.01642
4.75635	-1.61016		4.75628	5.02952
4.76048	-1.59353		4.76045	5.05367
4.76468	-1.57545		4.76462	5.08201
4.76882	-1.55075		4.76878	5.11175
4.77302	-1.52136		4.77295	5.14144
4.77715	-1.49363		4.77712	5.16565
4.78135	-1.4711		4.78128	5.17871
4.78548	-1.45292		4.78545	5.18092
4.78968	-1.43828		4.78962	5.17828
4.79382	-1.42505		4.79378	5.17822
4.79802	-1.40601		4.79795	5.18629
4.80215	-1.37481		4.80212	5.2056
4.80635	-1.33441		4.80628	5.23564
4.81048	-1.29378		4.81045	5.26803
4.81468	-1.25903		4.81462	5.28991
4.81882	-1.2313		4.81878	5.29712
4.82302	-1.20742		4.82295	5.29954
4.82715	-1.18082		4.82712	5.30967
4.83135	-1.14583		4.83128	5.32981
4.83548	-1.10051		4.83545	5.35376
4.83968	-1.04795		4.83962	5.37713
4.84382	-0.99663		4.84378	5.40019
4.84802	-0.95486		4.84795	5.42219
4.85215	-0.92182		4.85212	5.43992
4.85635	-0.88955		4.85628	5.45364
4.86048	-0.85421		4.86045	5.46806
4.86468	-0.81509		4.86462	5.48488
4.86882	-0.76787		4.86878	5.50019
4.87302	-0.71131		4.87295	5.51416
4.87715	-0.65225		4.87712	5.53859
4.88135	-0.59713		4.88128	5.58374
4.88548	-0.54643		4.88545	5.63929
4.88968	-0.49788		4.88962	5.68159
4.89382	-0.44914		4.89378	5.69788
4.89802	-0.3978		4.89795	5.69251
4.90215	-0.34115		4.90212	5.67665
4.90635	-0.27685		4.90628	5.6641
4.91048	-0.20516		4.91045	5.67285
4.91468	-0.13066		4.91462	5.71567
4.91882	-0.05922		4.91878	5.78258
4.92302	0.00721		4.92295	5.84474
4.92715	0.07128		4.92712	5.88143
4.93135	0.13556		4.93128	5.89536
4.93548	0.19832		4.93545	5.90374
4.93968	0.25835		4.93962	5.92113
4.94382	0.32224		4.94378	5.95101
4.94802	0.3984		4.94795	5.99094
4.95215	0.48602		4.95212	6.03926
4.95635	0.576		4.95628	6.09101
4.96048	0.65996		4.96045	6.13531
4.96468	0.7362		4.96462	6.16426
4.96882	0.80956		4.96878	6.17864
4.97302	0.88479		4.97295	6.18433
4.97715	0.96292		4.97712	6.19062
4.98135	1.04647		4.98128	6.20997
4.98548	1.1392		4.98545	6.25344
4.98968	1.238		4.98962	6.3212
4.99382	1.3334		4.99378	6.39679
4.99802	1.41931		4.99795	6.45689
5.00215	1.49849		5.00212	6.48999
5.00635	1.57902		5.00628	6.50452
5.01048	1.66696		5.01045	6.51905
5.01468	1.76418		5.01462	6.54434
5.01882	1.87209		5.01878	6.57791
5.02302	1.98975		5.02295	6.6174
5.02715	2.11054		5.02712	6.66862
5.03135	2.2284		5.03128	6.73303
5.03548	2.34319		5.03545	6.79946
5.03968	2.45816		5.03962	6.8551
5.04382	2.57463		5.04378	6.89446
5.04802	2.69128		5.04795	6.91804
5.05215	2.8101		5.05212	6.93229
5.05635	2.93619		5.05628	6.94979
5.06048	3.06915		5.06045	6.98309
5.06468	3.20156		5.06462	7.03673
5.06882	3.32723		5.06878	7.10184
5.07302	3.44535		5.07295	7.15901
5.07715	3.55768		5.07712	7.1966
5.08135	3.66684		5.08128	7.22286
5.08548	3.77551		5.08545	7.25
5.08968	3.88615		5.08962	7.27673
5.09382	4.00252		5.09378	7.2985
5.09802	4.12773		5.09795	7.32368
5.10215	4.26142		5.10212	7.36372
5.10635	4.39985		5.10628	7.4145
5.11048	4.53743		5.11045	7.46155
5.11468	4.66918		5.11462	7.49551
5.11882	4.79297		5.11878	7.51683
5.12302	4.91222		5.12295	7.53462
5.12715	5.03461		5.12712	7.56061
5.13135	5.1646		5.13128	7.60181
5.13548	5.30006		5.13545	7.65792
5.13968	5.43389		5.13962	7.72014
5.14382	5.55724		5.14378	7.77515
5.14802	5.66791		5.14795	7.81412
5.15215	5.77535		5.15212	7.83639
5.15635	5.88853		5.15628	7.84873
5.16048	6.00535		5.16045	7.86458
5.16468	6.12267		5.16462	7.89687
5.16882	6.24555		5.16878	7.9479
5.17302	6.37823		5.17295	8.00843
5.17715	6.51603		5.17712	8.06451
5.18135	6.65029		5.18128	8.10763
5.18548	6.77377		5.18545	8.14131
5.18968	6.88195		5.18962	8.17313
5.19382	6.97721		5.19378	8.20336
5.19802	7.07068		5.19795	8.22884
5.20215	7.17427		5.20212	8.25415
5.20635	7.29166		5.20628	8.29203
5.21048	7.41737		5.21045	8.34878
5.21468	7.54231		5.21462	8.41102
5.21882	7.65929		5.21878	8.45673
5.22302	7.76556		5.22295	8.48039
5.22715	7.8641		5.22712	8.49638
5.23135	7.96244		5.23128	8.52027
5.23548	8.06639		5.23545	8.55567
5.23968	8.17452		5.23962	8.59613
5.24382	8.28117		5.24378	8.63564
5.24802	8.38229		5.24795	8.6748
5.25215	8.47691		5.25212	8.71399
5.25635	8.56613		5.25628	8.74778
5.26048	8.65196		5.26045	8.77182
5.26468	8.73634		5.26462	8.78842
5.26882	8.82203		5.26878	8.8013
5.27302	8.91183		5.27295	8.81177
5.27715	9.00496		5.27712	8.82446
5.28135	9.09786		5.28128	8.85252
5.28548	9.18727		5.28545	8.90746
5.28968	9.2705		5.28962	8.98045
5.29382	9.3474		5.29378	9.04369
5.29802	9.42193		5.29795	9.07589
5.30215	9.49841		5.30212	9.08186
5.30635	9.57751		5.30628	9.08443
5.31048	9.65846		5.31045	9.10068
5.31468	9.74272		5.31462	9.13263
5.31882	9.83078		5.31878	9.17555
5.32302	9.91875		5.32295	9.22173
5.32715	10.0031		5.32712	9.25951
5.33135	10.0846		5.33128	9.28046
5.33548	10.1653		5.33545	9.28817
5.33968	10.2453		5.33962	9.29473
5.34382	10.3226		5.34378	9.3077
5.34802	10.3969		5.34795	9.32541
5.35215	10.4712		5.35212	9.34679
5.35635	10.5484		5.35628	9.37624
5.36048	10.6249		5.36045	9.41478
5.36468	10.6958		5.36462	9.45558
5.36882	10.7612		5.36878	9.49021
5.37302	10.8262		5.37295	9.51302
5.37715	10.8932		5.37712	9.52186
5.38135	10.9611		5.38128	9.52086
5.38548	11.0285		5.38545	9.52164
5.38968	11.0945		5.38962	9.53965
5.39382	11.1545		5.39378	9.58528
5.39802	11.2025		5.39795	9.65046
5.40215	11.238		5.40212	9.7096
5.40635	11.2693		5.40628	9.74352
5.41048	11.3081		5.41045	9.75457
5.41468	11.3612		5.41462	9.75533
5.41882	11.4261		5.41878	9.75665
5.42302	11.4936		5.42295	9.76699
5.42715	11.5561		5.42712	9.79135
5.43135	11.6116		5.43128	9.82844
5.43548	11.6626		5.43545	9.87059
5.43968	11.7098		5.43962	9.90854
5.44382	11.7508		5.44378	9.93823
5.44802	11.7863		5.44795	9.96003
5.45215	11.8209		5.45212	9.9731
5.45635	11.857		5.45628	9.97646
5.46048	11.895		5.46045	9.97512
5.46468	11.937		5.46462	9.98254
5.46882	11.9835		5.46878	10.0122
5.47302	12.0314		5.47295	10.0629
5.47715	12.0756		5.47712	10.1183
5.48135	12.1155		5.48128	10.1626
5.48548	12.1552		5.48545	10.1913
5.48968	12.1953		5.48962	10.2084
5.49382	12.2344		5.49378	10.2216
5.49802	12.2745		5.49795	10.2385
5.50215	12.3147		5.50212	10.2627
5.50635	12.3521		5.50628	10.2911
5.51048	12.3875		5.51045	10.3192
5.51468	12.4217		5.51462	10.3469
5.51882	12.4551		5.51878	10.3742
5.52302	12.4899		5.52295	10.3968
5.52715	12.5273		5.52712	10.4121
5.53135	12.5678		5.53128	10.4272
5.53548	12.6124		5.53545	10.456
5.53968	12.658		5.53962	10.5015
5.54382	12.6982		5.54378	10.5469
5.54802	12.7296		5.54795	10.5718
5.55215	12.7527		5.55212	10.5718
5.55635	12.7719		5.55628	10.5554
5.56048	12.7929		5.56045	10.5336
5.56468	12.8173		5.56462	10.5197
5.56882	12.8429		5.56878	10.5257
5.57302	12.8702		5.57295	10.557
5.57715	12.9017		5.57712	10.6052
5.58135	12.9349		5.58128	10.6465
5.58548	12.9662		5.58545	10.659
5.58968	12.9963		5.58962	10.6438
5.59382	13.0244		5.59378	10.6209
5.59802	13.0449		5.59795	10.6071
5.60215	13.0584		5.60212	10.6038
5.60635	13.0743		5.60628	10.6049
5.61048	13.0982		5.61045	10.6126
5.61468	13.1272		5.61462	10.6367
5.61882	13.1553		5.61878	10.6745
5.62302	13.1755		5.62295	10.7053
5.62715	13.1871		5.62712	10.7119
5.63135	13.1971		5.63128	10.697
5.63548	13.2089		5.63545	10.6748
5.63968	13.2235		5.63962	10.6557
5.64382	13.246		5.64378	10.6449
5.64802	13.2784		5.64795	10.6483
5.65215	13.3139		5.65212	10.6675
5.65635	13.3447		5.65628	10.6951
5.66048	13.3703		5.66045	10.7217
5.66468	13.3932		5.66462	10.7421
5.66882	13.414		5.66878	10.7534
5.67302	13.4327		5.67295	10.7549
5.67715	13.4524		5.67712	10.7487
5.68135	13.4746		5.68128	10.7397
5.68548	13.4969		5.68545	10.7352
5.68968	13.5161		5.68962	10.7429
5.69382	13.5324		5.69378	10.7648
5.69802	13.5494		5.69795	10.7937
5.70215	13.5686		5.70212	10.8171
5.70635	13.587		5.70628	10.8257
5.71048	13.6021		5.71045	10.8215
5.71468	13.6156		5.71462	10.8177
5.71882	13.6269		5.71878	10.8286
5.72302	13.6328		5.72295	10.8566
5.72715	13.6313		5.72712	10.8903
5.73135	13.6263		5.73128	10.9146
5.73548	13.6263		5.73545	10.9217
5.73968	13.6371		5.73962	10.9146
5.74382	13.6568		5.74378	10.9045
5.74802	13.6804		5.74795	10.9003
5.75215	13.705		5.75212	10.901
5.75635	13.7276		5.75628	10.9058
5.76048	13.7427		5.76045	10.9233
5.76468	13.7457		5.76462	10.9569
5.76882	13.7407		5.76878	10.9917
5.77302	13.7367		5.77295	11.0082
5.77715	13.7377		5.77712	11.0048
5.78135	13.7444		5.78128	10.9972
5.78548	13.7592		5.78545	10.997
5.78968	13.7825		5.78962	11.0029
5.79382	13.8073		5.79378	11.0129
5.79802	13.8255		5.79795	11.0332
5.80215	13.8336		5.80212	11.0639
5.80635	13.8325		5.80628	11.0893
5.81048	13.8261		5.81045	11.0923
5.81468	13.8217		5.81462	11.0742
5.81882	13.826		5.81878	11.0538
5.82302	13.8385		5.82295	11.0454
5.82715	13.8549		5.82712	11.0479
5.83135	13.8717		5.83128	11.0579
5.83548	13.8851		5.83545	11.0798
5.83968	13.8942		5.83962	11.1125
5.84382	13.9018		5.84378	11.1398
5.84802	13.9077		5.84795	11.1463
5.85215	13.9091		5.85212	11.1356
5.85635	13.9088		5.85628	11.1253
5.86048	13.9127		5.86045	11.1283
5.86468	13.9213		5.86462	11.1435
5.86882	13.9301		5.86878	11.1631
5.87302	13.9389		5.87295	11.1814
5.87715	13.9476		5.87712	11.1928
5.88135	13.9518		5.88128	11.1954
5.88548	13.9503		5.88545	11.1944
5.88968	13.95		5.88962	11.1956
5.89382	13.9557		5.89378	11.1987
5.89802	13.9658		5.89795	11.1998
5.90215	13.976		5.90212	11.2017
5.90635	13.9809		5.90628	11.2145
5.91048	13.9785		5.91045	11.2399
5.91468	13.9726		5.91462	11.2611
5.91882	13.9658		5.91878	11.2621
5.92302	13.9595		5.92295	11.2488
5.92715	13.9562		5.92712	11.2402
5.93135	13.9551		5.93128	11.2447
5.93548	13.9558		5.93545	11.2564
5.93968	13.9622		5.93962	11.2707
5.94382	13.9742		5.94378	11.2919
5.94802	13.9859		5.94795	11.3213
5.95215	13.9929		5.95212	11.3487
5.95635	13.994		5.95628	11.3609
5.96048	13.9907		5.96045	11.3545
5.96468	13.9881		5.96462	11.3374
5.96882	13.9885		5.96878	11.3217
5.97302	13.9912		5.97295	11.3146
5.97715	13.9965		5.97712	11.32
5.98135	14.0035		5.98128	11.3409
5.98548	14.0105		5.98545	11.3699
5.98968	14.0167		5.98962	11.3891
5.99382	14.0206		5.99378	11.3866
5.99802	14.0221		5.99795	11.3711
6.00215	14.0246		6.00212	11.3608
6.00635	14.0284		6.00628	11.3629
6.01048	14.0331		6.01045	11.3705
6.01468	14.0462		6.01462	11.3819
6.01882	14.0726		6.01878	11.4058
6.02302	14.1073		6.02295	11.4415
6.02715	14.1423		6.02712	11.4733
6.03135	14.1766		6.03128	11.4881
6.03548	14.2141		6.03545	11.4845
6.03968	14.2581		6.03962	11.4661
6.04382	14.3079		6.04378	11.44
6.04802	14.3625		6.04795	11.4173
6.05215	14.4203		6.05212	11.4087
6.05635	14.4751		6.05628	11.4184
6.06048	14.5208		6.06045	11.4417
6.06468	14.5594		6.06462	11.4659
6.06882	14.5978		6.06878	11.4779
6.07302	14.6388		6.07295	11.4728
6.07715	14.6775		6.07712	11.4582
6.08135	14.7063		6.08128	11.4484
6.08548	14.722		6.08545	11.452
6.08968	14.725		6.08962	11.4692
6.09382	14.7163		6.09378	11.4972
6.09802	14.6957		6.09795	11.5291
6.10215	14.6621		6.10212	11.5511
6.10635	14.6182		6.10628	11.553
6.11048	14.5723		6.11045	11.5402
6.11468	14.5319		6.11462	11.5255
6.11882	14.4998		6.11878	11.5163
6.12302	14.4723		6.12295	11.5169
6.12715	14.4398		6.12712	11.531
6.13135	14.397		6.13128	11.5513
6.13548	14.3509		6.13545	11.561
6.13968	14.3103		6.13962	11.5519
6.14382	14.2764		6.14378	11.5335
6.14802	14.2461		6.14795	11.5207
6.15215	14.218		6.15212	11.5186
6.15635	14.195		6.15628	11.5216
6.16048	14.1814		6.16045	11.5275
6.16468	14.1749		6.16462	11.5428
6.16882	14.1693		6.16878	11.5691
6.17302	14.1613		6.17295	11.5929
6.17715	14.1494		6.17712	11.5974
6.18135	14.1335		6.18128	11.5798
6.18548	14.1173		6.18545	11.5538
6.18968	14.1078		6.18962	11.5365
6.19382	14.1083		6.19378	11.5348
6.19802	14.1157		6.19795	11.5463
6.20215	14.1226		6.20212	11.5662
6.20635	14.1199		6.20628	11.5877
6.21048	14.1057		6.21045	11.6002
6.21468	14.0908		6.21462	11.5955
6.21882	14.0867		6.21878	11.5773
6.22302	14.0913		6.22295	11.5579
6.22715	14.0935		6.22712	11.5455
6.23135	14.0896		6.23128	11.5418
6.23548	14.0863		6.23545	11.5478
6.23968	14.0872		6.23962	11.5631
6.24382	14.0891		6.24378	11.5808
6.24802	14.0887		6.24795	11.5898
6.25215	14.0857		6.25212	11.5825
6.25635	14.0802		6.25628	11.5614
6.26048	14.0721		6.26045	11.5394
6.26468	14.063		6.26462	11.5303
6.26882	14.0576		6.26878	11.5369
6.27302	14.0574		6.27295	11.5532
6.27715	14.0576		6.27712	11.5758
6.28135	14.0522		6.28128	11.6019
6.28548	14.0424		6.28545	11.6203
6.28968	14.0337		6.28962	11.6183
6.29382	14.0267		6.29378	11.5972
6.29802	14.0178		6.29795	11.5727
6.30215	14.0074		6.30212	11.5576
6.30635	14.001		6.30628	11.5506
6.31048	14.0011		6.31045	11.5496
6.31468	14.0007		6.31462	11.5581
6.31882	13.9935		6.31878	11.5743
6.32302	13.9812		6.32295	11.5853
6.32715	13.969		6.32712	11.5829
6.33135	13.9623		6.33128	11.5727
6.33548	13.964		6.33545	11.565
6.33968	13.9718		6.33962	11.5623
6.34382	13.9815		6.34378	11.5647
6.34802	13.9896		6.34795	11.5761
6.35215	13.9917		6.35212	11.5947
6.35635	13.987		6.35628	11.6074
6.36048	13.9791		6.36045	11.6054
6.36468	13.9685		6.36462	11.5958
6.36882	13.9562		6.36878	11.587
6.37302	13.949		6.37295	11.5803
6.37715	13.9528		6.37712	11.5761
6.38135	13.9668		6.38128	11.5794
6.38548	13.9848		6.38545	11.5951
6.38968	13.9966		6.38962	11.6176
6.39382	13.9934		6.39378	11.6301
6.39802	13.9768		6.39795	11.6227
6.40215	13.9593		6.40212	11.6037
6.40635	13.9518		6.40628	11.5865
6.41048	13.9545		6.41045	11.5755
6.41468	13.9625		6.41462	11.5699
6.41882	13.9725		6.41878	11.5752
6.42302	13.9813		6.42295	11.6012
6.42715	13.9825		6.42712	11.6393
6.43135	13.9749		6.43128	11.663
6.43548	13.965		6.43545	11.6576
6.43968	13.9573		6.43962	11.6331
6.44382	13.9497		6.44378	11.6055
6.44802	13.9393		6.44795	11.5829
6.45215	13.929		6.45212	11.5706
6.45635	13.9256		6.45628	11.5771
6.46048	13.932		6.46045	11.6048
6.46468	13.9427		6.46462	11.6373
6.46882	13.9487		6.46878	11.6534
6.47302	13.9473		6.47295	11.649
6.47715	13.9448		6.47712	11.6356
6.48135	13.9464		6.48128	11.6234
6.48548	13.9512		6.48545	11.6131
6.48968	13.9585		6.48962	11.6044
6.49382	13.9686		6.49378	11.6059
6.49802	13.9779		6.49795	11.6227
6.50215	13.9794		6.50212	11.6414
6.50635	13.9711		6.50628	11.6438
6.51048	13.9582		6.51045	11.6298
6.51468	13.9469		6.51462	11.6145
6.51882	13.9405		6.51878	11.6069
6.52302	13.9396		6.52295	11.6023
6.52715	13.9442		6.52712	11.5988
6.53135	13.9534		6.53128	11.6044
6.53548	13.9627		6.53545	11.6216
6.53968	13.9646		6.53962	11.6373
6.54382	13.9583		6.54378	11.6391
6.54802	13.9497		6.54795	11.6296
6.55215	13.9424		6.55212	11.6169
6.55635	13.9378		6.55628	11.6071
6.56048	13.9393		6.56045	11.6049
6.56468	13.9471		6.56462	11.6145
6.56882	13.9565		6.56878	11.6389
6.57302	13.9632		6.57295	11.673
6.57715	13.9665		6.57712	11.7017
6.58135	13.966		6.58128	11.7105
6.58548	13.9611		6.58545	11.6986
6.58968	13.9545		6.58962	11.6794
6.59382	13.9539		6.59378	11.67
6.59802	13.9642		6.59795	11.6777
6.60215	13.9818		6.60212	11.6967
6.60635	13.9973		6.60628	11.7196
6.61048	14.0034		6.61045	11.7431
6.61468	14.0017		6.61462	11.7635
6.61882	13.9957		6.61878	11.7752
6.62302	13.988		6.62295	11.7781
6.62715	13.9825		6.62712	11.7776
6.63135	13.9839		6.63128	11.7787
6.63548	13.9952		6.63545	11.7856
6.63968	14.016		6.63962	11.807
6.64382	14.0415		6.64378	11.8449
6.64802	14.0636		6.64795	11.8848
6.65215	14.0749		6.65212	11.9084
6.65635	14.076		6.65628	11.911
6.66048	14.0734		6.66045	11.8991
6.66468	14.0706		6.66462	11.8854
6.66882	14.0663		6.66878	11.883
6.67302	14.0641		6.67295	11.8949
6.67715	14.0716		6.67712	11.9165
6.68135	14.0886		6.68128	11.946
6.68548	14.1067		6.68545	11.9785
6.68968	14.1194		6.68962	11.9999
6.69382	14.1265		6.69378	12.0009
6.69802	14.1315		6.69795	11.9852
6.70215	14.1374		6.70212	11.9641
6.70635	14.1431		6.70628	11.9485
6.71048	14.1477		6.71045	11.9446
6.71468	14.1507		6.71462	11.9545
6.71882	14.1493		6.71878	11.9757
6.72302	14.1423		6.72295	11.9976
6.72715	14.1342		6.72712	12.0098
6.73135	14.1286		6.73128	12.0128
6.73548	14.1269		6.73545	12.0127
6.73968	14.1304		6.73962	12.0108
6.74382	14.1379		6.74378	12.0066
6.74802	14.1478		6.74795	12.0044
6.75215	14.1629		6.75212	12.0119
6.75635	14.1859		6.75628	12.0283
6.76048	14.2137		6.76045	12.0415
6.76468	14.2382		6.76462	12.0427
6.76882	14.255		6.76878	12.0338
6.77302	14.2672		6.77295	12.0216
6.77715	14.2811		6.77712	12.011
6.78135	14.3023		6.78128	12.0062
6.78548	14.3333		6.78545	12.0114
6.78968	14.37		6.78962	12.0301
6.79382	14.4057		6.79378	12.0574
6.79802	14.4378		6.79795	12.0766
6.80215	14.4683		6.80212	12.075
6.80635	14.498		6.80628	12.0572
6.81048	14.5235		6.81045	12.037
6.81468	14.5424		6.81462	12.0237
6.81882	14.557		6.81878	12.0219
6.82302	14.5701		6.82295	12.0382
6.82715	14.5795		6.82712	12.0719
6.83135	14.5795		6.83128	12.1042
6.83548	14.5665		6.83545	12.1152
6.83968	14.5437		6.83962	12.1035
6.84382	14.5184		6.84378	12.0796
6.84802	14.4973		6.84795	12.0532
6.85215	14.4814		6.85212	12.0336
6.85635	14.4672		6.85628	12.0295
6.86048	14.4482		6.86045	12.0441
6.86468	14.4214		6.86462	12.071
6.86882	14.3914		6.86878	12.0967
6.87302	14.3647		6.87295	12.1111
6.87715	14.3425		6.87712	12.1131
6.88135	14.3226		6.88128	12.1052
6.88548	14.3033		6.88545	12.09
6.88968	14.2874		6.88962	12.0747
6.89382	14.28		6.89378	12.0686
6.89802	14.2817		6.89795	12.0778
6.90215	14.2888		6.90212	12.1033
6.90635	14.2971		6.90628	12.1353
6.91048	14.3022		6.91045	12.1557
6.91468	14.3015		6.91462	12.1562
6.91882	14.3009		6.91878	12.1445
6.92302	14.3102		6.92295	12.1313
6.92715	14.3323		6.92712	12.123
6.93135	14.3651		6.93128	12.1249
6.93548	14.4079		6.93545	12.1377
6.93968	14.4557		6.93962	12.1535
6.94382	14.4979		6.94378	12.1602
6.94802	14.5324		6.94795	12.1537
6.95215	14.5695		6.95212	12.1398
6.95635	14.6161		6.95628	12.1259
6.96048	14.6678		6.96045	12.1174
6.96468	14.7192		6.96462	12.1207
6.96882	14.7727		6.96878	12.1394
6.97302	14.8324		6.97295	12.1697
6.97715	14.8939		6.97712	12.1992
6.98135	14.9467		6.98128	12.2126
6.98548	14.9869		6.98545	12.2064
6.98968	15.0212		6.98962	12.1903
6.99382	15.0558		6.99378	12.1743
6.99802	15.093		6.99795	12.1632
7.00215	15.1339		7.00212	12.162
7.00635	15.1747		7.00628	12.1763
7.01048	15.206		7.01045	12.2059
7.01468	15.2223		7.01462	12.238
7.01882	15.2265		7.01878	12.2535
7.02302	15.2221		7.02295	12.2452
7.02715	15.2082		7.02712	12.2233
7.03135	15.1822		7.03128	12.2009
7.03548	15.1439		7.03545	12.1863
7.03968	15.1001		7.03962	12.1843
7.04382	15.0603		7.04378	12.1963
7.04802	15.0258		7.04795	12.2215
7.05215	14.9903		7.05212	12.2509
7.05635	14.949		7.05628	12.2663
7.06048	14.9013		7.06045	12.257
7.06468	14.8493		7.06462	12.2319
7.06882	14.7994		7.06878	12.2066
7.07302	14.7574		7.07295	12.1891
7.07715	14.7218		7.07712	12.1816
7.08135	14.6879		7.08128	12.1873
7.08548	14.6534		7.08545	12.2058
7.08968	14.6205		7.08962	12.2272
7.09382	14.5939		7.09378	12.2388
7.09802	14.577		7.09795	12.2352
7.10215	14.566		7.10212	12.224
7.10635	14.5547		7.10628	12.2173
7.11048	14.543		7.11045	12.2185
7.11468	14.5352		7.11462	12.2226
7.11882	14.531		7.11878	12.2308
7.12302	14.5234		7.12295	12.2462
7.12715	14.5096		7.12712	12.2619
7.13135	14.4954		7.13128	12.2691
7.13548	14.4858		7.13545	12.2684
7.13968	14.4821		7.13962	12.2647
7.14382	14.4836		7.14378	12.2614
7.14802	14.4856		7.14795	12.2582
7.15215	14.4819		7.15212	12.2568
7.15635	14.4718		7.15628	12.267
7.16048	14.4611		7.16045	12.2897
7.16468	14.453		7.16462	12.3055
7.16882	14.4442		7.16878	12.2987
7.17302	14.4329		7.17295	12.2768
7.17715	14.4213		7.17712	12.2561
7.18135	14.4091		7.18128	12.2436
7.18548	14.3976		7.18545	12.241
7.18968	14.3943		7.18962	12.2507
7.19382	14.4016		7.19378	12.272
7.19802	14.4134		7.19795	12.2959
7.20215	14.4254		7.20212	12.3087
7.20635	14.4358		7.20628	12.3025
7.21048	14.4433		7.21045	12.2833
7.21468	14.4459		7.21462	12.2638
7.21882	14.4408		7.21878	12.2515
7.22302	14.4299		7.22295	12.2459
7.22715	14.4218		7.22712	12.247
7.23135	14.4246		7.23128	12.2574
7.23548	14.4377		7.23545	12.2751
7.23968	14.4536		7.23962	12.292
7.24382	14.465		7.24378	12.3001
7.24802	14.468		7.24795	12.2962
7.25215	14.4631		7.25212	12.2842
7.25635	14.4549		7.25628	12.2726
7.26048	14.4493		7.26045	12.2685
7.26468	14.4478		7.26462	12.2762
7.26882	14.4473		7.26878	12.2965
7.27302	14.4451		7.27295	12.3182
7.27715	14.4404		7.27712	12.326
7.28135	14.435		7.28128	12.3173
7.28548	14.4316		7.28545	12.301
7.28968	14.4307		7.28962	12.2866
7.29382	14.432		7.29378	12.2788
7.29802	14.4367		7.29795	12.2771
7.30215	14.4436		7.30212	12.2838
7.30635	14.4467		7.30628	12.3021
7.31048	14.4433		7.31045	12.3243
7.31468	14.4341		7.31462	12.3355
7.31882	14.4204		7.31878	12.3305
7.32302	14.4052		7.32295	12.3159
7.32715	14.3945		7.32712	12.3022
7.33135	14.3905		7.33128	12.2971
7.33548	14.3902		7.33545	12.3023
7.33968	14.3909		7.33962	12.3138
7.34382	14.392		7.34378	12.324
7.34802	14.3912		7.34795	12.3253
7.35215	14.385		7.35212	12.316
7.35635	14.3768		7.35628	12.3007
7.36048	14.3746		7.36045	12.2845
7.36468	14.3792		7.36462	12.2716
7.36882	14.386		7.36878	12.266
7.37302	14.3941		7.37295	12.2741
7.37715	14.4025		7.37712	12.2997
7.38135	14.4058		7.38128	12.3324
7.38548	14.3995		7.38545	12.3522
7.38968	14.3857		7.38962	12.3501
7.39382	14.3724		7.39378	12.3315
7.39802	14.3677		7.39795	12.3061
7.40215	14.3719		7.40212	12.2845
7.40635	14.3796		7.40628	12.273
7.41048	14.3864		7.41045	12.2732
7.41468	14.3909		7.41462	12.2865
7.41882	14.3966		7.41878	12.3088
7.42302	14.4069		7.42295	12.3273
7.42715	14.4183		7.42712	12.3303
7.43135	14.4222		7.43128	12.3171
7.43548	14.4146		7.43545	12.2962
7.43968	14.3977		7.43962	12.2759
7.44382	14.38		7.44378	12.262
7.44802	14.3748		7.44795	12.2609
7.45215	14.3901		7.45212	12.2751
7.45635	14.4201		7.45628	12.2979
7.46048	14.4492		7.46045	12.316
7.46468	14.4634		7.46462	12.319
7.46882	14.4603		7.46878	12.3056
7.47302	14.4488		7.47295	12.2834
7.47715	14.4413		7.47712	12.2628
7.48135	14.4451		7.48128	12.2509
7.48548	14.4586		7.48545	12.2521
7.48968	14.4716		7.48962	12.2678
7.49382	14.4786		7.49378	12.2905
7.49802	14.484		7.49795	12.3062
7.50215	14.4924		7.50212	12.3071
7.50635	14.5031		7.50628	12.2968
7.51048	14.5133		7.51045	12.2835
7.51468	14.5197		7.51462	12.2738
7.51882	14.5232		7.51878	12.2712
7.52302	14.5277		7.52295	12.2758
7.52715	14.5341		7.52712	12.2831
7.53135	14.5398		7.53128	12.2876
7.53548	14.5409		7.53545	12.2857
7.53968	14.5329		7.53962	12.2779
7.54382	14.5171		7.54378	12.2695
7.54802	14.5034		7.54795	12.2647
7.55215	14.5022		7.55212	12.2622
7.55635	14.5162		7.55628	12.2639
7.56048	14.537		7.56045	12.276
7.56468	14.5488		7.56462	12.2944
7.56882	14.5431		7.56878	12.3039
7.57302	14.5276		7.57295	12.2957
7.57715	14.5179		7.57712	12.2751
7.58135	14.5202		7.58128	12.2517
7.58548	14.5263		7.58545	12.2323
7.58968	14.5287		7.58962	12.2218
7.59382	14.5309		7.59378	12.2258
7.59802	14.5399		7.59795	12.2463
7.60215	14.5542		7.60212	12.2718
7.60635	14.5639		7.60628	12.2845
7.61048	14.5631		7.61045	12.2799
7.61468	14.5556		7.61462	12.266
7.61882	14.5488		7.61878	12.2514
7.62302	14.5452		7.62295	12.2384
7.62715	14.5452		7.62712	12.2285
7.63135	14.5508		7.63128	12.2294
7.63548	14.5623		7.63545	12.2462
7.63968	14.5739		7.63962	12.2697
7.64382	14.5781		7.64378	12.2863
7.64802	14.5736		7.64795	12.2889
7.65215	14.5661		7.65212	12.277
7.65635	14.5627		7.65628	12.255
7.66048	14.565		7.66045	12.2306
7.66468	14.5684		7.66462	12.2116
7.66882	14.5701		7.66878	12.2072
7.67302	14.5722		7.67295	12.2224
7.67715	14.5751		7.67712	12.246
7.68135	14.5733		7.68128	12.2585
7.68548	14.5654		7.68545	12.2523
7.68968	14.5597		7.68962	12.2325
7.69382	14.5636		7.69378	12.2091
7.69802	14.573		7.69795	12.1919
7.70215	14.5825		7.70212	12.1853
7.70635	14.5949		7.70628	12.1893
7.71048	14.6109		7.71045	12.2022
7.71468	14.6226		7.71462	12.2148
7.71882	14.625		7.71878	12.2143
7.72302	14.6236		7.72295	12.1987
7.72715	14.6264		7.72712	12.1758
7.73135	14.6334		7.73128	12.1557
7.73548	14.6378		7.73545	12.1456
7.73968	14.6361		7.73962	12.1491
7.74382	14.6288		7.74378	12.1669
7.74802	14.616		7.74795	12.1918
7.75215	14.601		7.75212	12.2067
7.75635	14.5933		7.75628	12.2013
7.76048	14.6004		7.76045	12.1817
7.76468	14.6212		7.76462	12.1582
7.76882	14.647		7.76878	12.1361
7.77302	14.6663		7.77295	12.1207
7.77715	14.672		7.77712	12.1227
7.78135	14.6675		7.78128	12.1491
7.78548	14.6606		7.78545	12.1877
7.78968	14.6525		7.78962	12.2125
7.79382	14.6426		7.79378	12.2097
7.79802	14.6364		7.79795	12.1888
7.80215	14.6378		7.80212	12.1667
7.80635	14.6455		7.80628	12.1503
7.81048	14.6588		7.81045	12.1404
7.81468	14.6753		7.81462	12.1435
7.81882	14.6865		7.81878	12.1632
7.82302	14.6872		7.82295	12.1877
7.82715	14.6834		7.82712	12.1994
7.83135	14.684		7.83128	12.1952
7.83548	14.6895		7.83545	12.1849
7.83968	14.6936		7.83962	12.1766
7.84382	14.6921		7.84378	12.1698
7.84802	14.6896		7.84795	12.1635
7.85215	14.6934		7.85212	12.1662
7.85635	14.7033		7.85628	12.187
7.86048	14.7131		7.86045	12.2179
7.86468	14.7202		7.86462	12.2408
7.86882	14.7271		7.86878	12.2495
7.87302	14.7324		7.87295	12.2524
7.87715	14.7311		7.87712	12.2573
7.88135	14.7216		7.88128	12.266
7.88548	14.7104		7.88545	12.2789
7.88968	14.7083		7.88962	12.3029
7.89382	14.7178		7.89378	12.3471
7.89802	14.7279		7.89795	12.4075
7.90215	14.7285		7.90212	12.4627
7.90635	14.7226		7.90628	12.4918
7.91048	14.7183		7.91045	12.4912
7.91468	14.7179		7.91462	12.4729
7.91882	14.7183		7.91878	12.4528
7.92302	14.7187		7.92298	12.4446
7.92715	14.7205		7.92712	12.4578
7.93135	14.7209		7.93128	12.4874
7.93548	14.7173		7.93545	12.5109
7.93968	14.7128		7.93962	12.508
7.94382	14.708		7.94378	12.4771
7.94802	14.7024		7.94795	12.4324
7.95215	14.7013		7.95212	12.3928
7.95635	14.7086		7.95628	12.3717
7.96048	14.7203		7.96045	12.3738
7.96468	14.7315		7.96462	12.3938
7.96882	14.743		7.96878	12.4123
7.97302	14.7542		7.97295	12.4046
7.97715	14.7609		7.97712	12.3612
7.98135	14.7634		7.98128	12.2968
7.98548	14.7683		7.98545	12.2364
7.98968	14.7798		7.98962	12.1972
7.99382	14.7971		7.99378	12.1832
7.99802	14.821		7.99795	12.1923
8.00215	14.8523		8.00212	12.219
8.00635	14.8851		8.00628	12.2463
8.01048	14.9119		8.01045	12.2499
8.01468	14.9339		8.01462	12.2182
8.01882	14.9586		8.01878	12.1624
8.02302	14.9878		8.02295	12.1068
8.02715	15.0184		8.02712	12.0714
8.03135	15.0524		8.03128	12.0604
8.03548	15.0949		8.03545	12.0668
8.03968	15.1448		8.03962	12.0807
8.04382	15.1932		8.04378	12.0889
8.04802	15.2326		8.04795	12.0804
8.05215	15.2619		8.05212	12.0585
8.05635	15.2804		8.05628	12.0364
8.06048	15.2901		8.06045	12.0226
8.06468	15.2972		8.06462	12.0148
8.06882	15.3046		8.06878	12.0071
8.07302	15.3117		8.07295	11.9996
8.07715	15.3173		8.07712	12.0008
8.08135	15.3167		8.08128	12.0148
8.08548	15.3039		8.08545	12.0324
8.08968	15.2797		8.08962	12.0384
8.09382	15.2497		8.09378	12.0263
8.09802	15.2146		8.09795	12.0026
8.10215	15.1743		8.10212	11.979
8.10635	15.1336		8.10628	11.9627
8.11048	15.0949		8.11045	11.961
8.11468	15.0569		8.11462	11.982
8.11882	15.0216		8.11878	12.0186
8.12302	14.9905		8.12295	12.0463
8.12715	14.964		8.12712	12.0478
8.13135	14.9417		8.13128	12.028
8.13548	14.9197		8.13545	12.0009
8.13968	14.8964		8.13962	11.9774
8.14382	14.88		8.14378	11.967
8.14802	14.8779		8.14795	11.9744
8.15215	14.8855		8.15212	11.9905
8.15635	14.8909		8.15628	11.999
8.16048	14.8874		8.16045	11.991
8.16468	14.8781		8.16462	11.9709
8.16882	14.8702		8.16878	11.9496
8.17302	14.8672		8.17295	11.9357
8.17715	14.8664		8.17712	11.9331
8.18135	14.8661		8.18128	11.9416
8.18548	14.8683		8.18545	11.9578
8.18968	14.8714		8.18962	11.9755
8.19382	14.8704		8.19378	11.9823
8.19802	14.8656		8.19795	11.9686
8.20215	14.8619		8.20212	11.9399
8.20635	14.8598		8.20628	11.9098
8.21048	14.8581		8.21045	11.8863
8.21468	14.8608		8.21462	11.8732
8.21882	14.872		8.21878	11.8775
8.22302	14.8881		8.22295	11.9013
8.22715	14.9004		8.22712	11.9312
8.23135	14.9006		8.23128	11.9485
8.23548	14.8903		8.23545	11.9436
8.23968	14.8802		8.23962	11.9201
8.24382	14.8794		8.24378	11.892
8.24802	14.888		8.24795	11.8713
8.25215	14.9029		8.25212	11.8588
8.25635	14.922		8.25628	11.8549
8.26048	14.9433		8.26045	11.8667
8.26468	14.959		8.26462	11.8908
8.26882	14.9609		8.26878	11.9084
8.27302	14.951		8.27295	11.9047
8.27715	14.94		8.27712	11.8828
8.28135	14.9351		8.28128	11.8585
8.28548	14.9385		8.28545	11.844
8.28968	14.9498		8.28962	11.8396
8.29382	14.9632		8.29378	11.8441
8.29802	14.9707		8.29795	11.8628
8.30215	14.97		8.30212	11.8913
8.30635	14.9659		8.30628	11.909
8.31048	14.964		8.31045	11.9013
8.31468	14.9644		8.31462	11.8736
8.31882	14.9633		8.31878	11.8407
8.32302	14.9599		8.32295	11.8147
[truncated: 5,683 more rows]

## Sheet: 11c
PI													PII
************************ DR INTERMEDIATE RESULTS REPORT v2.4 ************************													************************ DR INTERMEDIATE RESULTS REPORT v2.4 ************************
RAW DATA REPORT													RAW DATA REPORT
#Date-Of-Report: 04/12/2024 09:42:52													#Date-Of-Report: 04/12/2024 09:44:23
SW Version: 6.5.3(6.5.3.1)													SW Version: 6.5.3(6.5.3.1)
#SampleID: Sample 2													#SampleID: aPI
#Test: TCT+aPV	Test Release: 7.6												#Test: TCT+aPI	Test Release: 7.6
#Type: Patient													#Type: Patient
#AquisitionMode: Standard													#AquisitionMode: Standard
Not a Shadow/Parent	Not a Paired Test												Not a Shadow/Parent	Not a Paired Test
Report generated by: SysAdmin	[20]												Report generated by: SysAdmin	[20]
INTERMEDIATE VALUES FOR SINGLE DETERMINATION (PRIMARY WAVELENGTH)													INTERMEDIATE VALUES FOR SINGLE DETERMINATION (PRIMARY WAVELENGTH)
#Wavelength: 671nm-Red	#SampleRate: 1												#Wavelength: 671nm-Red	#SampleRate: 1
#ORUChannel: 0	#ORUHead: 2												#ORUChannel: 0	#ORUHead: 0
#AMErrors: 0													#AMErrors: 0
#Concentration: 0	#Determination: 0	Delay Points: 50											#Concentration: 0	#Determination: 0	Delay Points: 50
ORU Blank Value: 0.86683000													ORU Blank Value: 0.84024900
#Time	AM_Data	Flags	Raw	Normalized	Deriv1	Deriv2							#Time	AM_Data	Flags	Raw	Normalized	Deriv1	Deriv2
-----	-------	-----	---	----------	------	------							-----	-------	-----	---	----------	------	------
0D	176360	0											0D	838289	0
1D	177327	0											1D	840852	0
2D	197431	0											2D	842622	0
3D	244258	0											3D	843070	0
4D	298479	0											4D	831086	0
5D	340987	0											5D	842787	0
6D	342607	0											6D	843119	0
7D	344614	0											7D	842989	0
8D	347214	0											8D	843225	0
9D	347942	0											9D	843125	0
10D	349163	0											10D	843538	0
11D	349681	0											11D	843117	0
12D	349619	0											12D	842677	0
13D	349469	0											13D	842538	0
14D	349522	0											14D	842584	0
15D	349649	0											15D	842848	0
16D	349971	0											16D	843101	0
17D	350046	0											17D	843302	0
18D	350000	0											18D	843542	0
19D	349867	0											19D	843610	0
20D	349756	0											20D	843688	0
21D	349516	0											21D	843796	0
22D	349266	0											22D	843823	0
23D	349053	0											23D	843797	0
24D	348900	0											24D	843830	0
25D	348697	0											25D	843841	0
26D	348478	0											26D	843847	0
27D	348408	0											27D	843930	0
28D	348300	0											28D	843849	0
29D	348247	0											29D	843925	0
30D	348106	0											30D	843880	0
31D	348022	0											31D	843858	0
32D	348068	0											32D	843881	0
33D	348047	0											33D	843904	0
34D	348100	0											34D	843901	0
35D	348113	0											35D	843885	0
36D	348168	0											36D	843906	0
37D	348155	0											37D	843898	0
38D	348223	0											38D	843854	0
39D	348195	0											39D	843892	0
40D	348189	0											40D	843927	0
41D	348141	0											41D	843918	0
42D	348191	0											42D	843842	0
43D	348132	0											43D	843906	0
44D	348136	0											44D	843951	0
45D	348157	0											45D	843939	0
46D	348133	0											46D	843872	0
47D	348146	0											47D	843887	0
48D	348150	0											48D	843854	0
49D	348159	0											49D	843906	0
50	348169	0											50	843858	0
51	348188	0											51	843894	0
52	348235	0											52	843845	0	1.00428	-1.85468
53	348250	0											53	843836	0	1.00427	-1.85159
54	348191	0											54	843833	0	1.00427	-1.84842
55	348221	0											55	843849	0	1.00428	-1.84631
56	348237	0											56	843807	0	1.00423	-1.8453
57	348264	0											57	843787	0	1.00421	-1.84502
58	348286	0											58	843814	0	1.00424	-1.84495	-0.0553983
59	348332	0											59	843841	0	1.00427	-1.84502	-0.0213366
60	348358	0											60	843793	0	1.00422	-1.84523	0.00652998
61	348390	0											61	843794	0	1.00422	-1.84588	0.0303246
62	348433	0	0.401962	395.815									62	843776	0	1.0042	-1.84697	0.0520935
63	348472	0	0.402007	395.793									63	843835	0	1.00427	-1.84734	0.0720748
64	348442	0	0.401973	395.779									64	843864	0	1.0043	-1.84803	0.091101	1.99465
65	348456	0	0.401989	395.762									65	843795	0	1.00422	-1.84897	0.108945	1.81962
66	348538	0	0.402083	395.743									66	843800	0	1.00423	-1.85037	0.125306	1.68568
67	348486	0	0.402023	395.732									67	843893	0	1.00434	-1.85203	0.140099	1.5757
68	348483	0	0.40202	395.725	-0.775366								68	843811	0	1.00424	-1.85395	0.153238	1.47298
69	348510	0	0.402051	395.721	-0.599287								69	843860	0	1.0043	-1.85594	0.16939	1.37523
70	348549	0	0.402096	395.719	-0.434468								70	843801	0	1.00423	-1.85814	0.183959	1.27519
71	348572	0	0.402123	395.72	-0.2999								71	843819	0	1.00425	-1.86047	0.197017	1.1747
72	348591	0	0.402145	395.723	-0.193772								72	843867	0	1.00431	-1.86298	0.208812	1.0764
73	348525	0	0.402068	395.722	-0.11886								73	843821	0	1.00425	-1.86557	0.219409	0.981336
74	348657	0	0.402221	395.722	-0.0621862	6.33652							74	843907	0	1.00435	-1.86842	0.228851	0.888883
75	348639	0	0.4022	395.723	-0.0222219	4.7211							75	843849	0	1.00428	-1.87124	0.237103	0.76059
76	348672	0	0.402238	395.726	-0.00241594	3.06151							76	843821	0	1.00425	-1.8742	0.244124	0.635288
77	348690	0	0.402259	395.73	-0.00441294	1.52313							77	843849	0	1.00428	-1.87743	0.249909	0.512909
78	348632	0	0.402192	395.736	-0.0283858	0.100441							78	843840	0	1.00427	-1.88078	0.254474	0.391884
79	348590	0	0.402143	395.743	-0.0137076	-1.17812							79	843916	0	1.00436	-1.88425	0.257859	0.27216
80	348476	0	0.402012	395.751	-0.014983	-2.4142							80	843962	0	1.00442	-1.88767	0.259904	0.153956
81	348458	0	0.401991	395.76	-0.0327547	-3.61143							81	843898	0	1.00434	-1.8911	0.260661	0.0381261
82	348384	0	0.401906	395.769	-0.0670866	-4.72909							82	843947	0	1.0044	-1.89455	0.260194	-0.0742744
83	348419	0	0.401946	395.776	-0.117124	-5.73942							83	843904	0	1.00435	-1.89786	0.258567	-0.182496
84	348416	0	0.401943	395.783	-0.181719	-6.65446							84	843965	0	1.00442	-1.90108	0.255838	-0.285961
85	348448	0	0.40198	395.789	-0.260234	-7.96873							85	843991	0	1.00445	-1.90413	0.252068	-0.384245
86	348349	0	0.401865	395.794	-0.351891	-9.21645							86	843992	0	1.00445	-1.90706	0.247326	-0.475312
87	348353	0	0.40187	395.798	-0.455593	-10.3807							87	843991	0	1.00445	-1.90985	0.241678	-0.558856
88	348398	0	0.401922	395.8	-0.569907	-11.4472							88	843969	0	1.00443	-1.91244	0.235211	-0.63466
89	348347	0	0.401863	395.802	-0.693144	-12.4098							89	843975	0	1.00443	-1.91506	0.22801	-0.702559
90	348319	0	0.401831	395.801	-0.826921	-13.2645							90	843982	0	1.00444	-1.91752	0.220159	-0.762386
91	348323	0	0.401835	395.798	-0.969955	-14.003							91	843989	0	1.00445	-1.91994	0.21175	-0.813953
92	348272	0	0.401777	395.793	-1.12096	-14.6187							92	843999	0	1.00446	-1.92217	0.202866	-0.857054
93	348326	0	0.401839	395.785	-1.27844	-15.1082							93	843972	0	1.00443	-1.92417	0.193598	-0.891608
94	348327	0	0.40184	395.774	-1.44075	-15.4718							94	844018	0	1.00449	-1.92612	0.184035	-0.917826
95	348336	0	0.40185	395.76	-1.6063	-15.7116							95	843957	0	1.00441	-1.92783	0.174259	-0.93599
96	348424	0	0.401952	395.742	-1.77346	-15.8025							96	843979	0	1.00444	-1.92956	0.164351	-0.94653
97	348437	0	0.401967	395.722	-1.94059	-15.745							97	844031	0	1.0045	-1.93116	0.154394	-0.949808
98	348475	0	0.402011	395.7	-2.10613	-15.5401							98	843993	0	1.00446	-1.9325	0.144479	-0.946195
99	348490	0	0.402028	395.674	-2.26858	-15.1913							99	843994	0	1.00446	-1.93366	0.134685	-0.936225
100	348524	0	0.402067	395.647	-2.42653	-14.7043							100	843975	0	1.00443	-1.93471	0.125072	-0.920555
101	348529	0	0.402073	395.617	-2.57853	-14.0858							101	844088	0	1.00457	-1.93573	0.115691	-0.899772
102	348607	0	0.402163	395.585	-2.72323	-13.3441							102	844022	0	1.00449	-1.93649	0.106576	-0.874375
103	348578	0	0.40213	395.551	-2.85936	-12.4887							103	843979	0	1.00444	-1.93706	0.097773	-0.845084
104	348644	0	0.402206	395.516	-2.98577	-11.5297							104	843959	0	1.00442	-1.93764	0.0893228	-0.812754
105	348621	0	0.402179	395.479	-3.10139	-10.4779							105	843952	0	1.00441	-1.93826	0.0812509	-0.778184
106	348661	0	0.402225	395.441	-3.20526	-9.34418							106	844009	0	1.00447	-1.93895	0.0735682	-0.741873
107	348667	0	0.402232	395.401	-3.2966	-8.14126							107	844067	0	1.00454	-1.93961	0.0662868	-0.704185
108	348707	0	0.402278	395.36	-3.37475	-6.88204							108	844020	0	1.00449	-1.94007	0.0594262	-0.66539
109	348767	0	0.402348	395.318	-3.43924	-5.57933							109	844064	0	1.00454	-1.94049	0.0529841	-0.625987
110	348831	0	0.402421	395.274	-3.4897	-4.24617							110	844000	0	1.00446	-1.94082	0.0469487	-0.586374
111	348916	0	0.40252	395.231	-3.52592	-2.89592							111	844074	0	1.00455	-1.94117	0.041303	-0.546814
112	348964	0	0.402575	395.187	-3.54783	-1.5415							112	844013	0	1.00448	-1.94135	0.0360476	-0.50746
113	349069	0	0.402696	395.143	-3.55548	-0.195082							113	843986	0	1.00445	-1.9414	0.031189	-0.468598
114	349074	0	0.402702	395.101	-3.54907	1.1321							114	844029	0	1.0045	-1.94154	0.0267288	-0.430589
115	349119	0	0.402754	395.059	-3.52888	2.43002							115	844008	0	1.00447	-1.94162	0.0226546	-0.393478
116	349190	0	0.402836	395.018	-3.49531	3.68945							116	844026	0	1.0045	-1.94179	0.0189579	-0.357187
117	349156	0	0.402796	394.978	-3.4489	4.90219							117	843997	0	1.00446	-1.94176	0.0156333	-0.321553
118	349168	0	0.40281	394.939	-3.39024	6.06135							118	844020	0	1.00449	-1.94172	0.012673	-0.286738
119	349172	0	0.402815	394.901	-3.32001	7.1609							119	843986	0	1.00445	-1.94167	0.0100551	-0.253001
120	349216	0	0.402866	394.864	-3.2389	8.19544							120	844050	0	1.00452	-1.94168	0.00775554	-0.220475
121	349282	0	0.402942	394.828	-3.14763	9.16037							121	844010	0	1.00448	-1.94158	0.00576674	-0.189097
122	349286	0	0.402946	394.793	-3.04697	10.0521							122	843985	0	1.00445	-1.94141	0.00408619	-0.158873
123	349337	0	0.403005	394.759	-2.93766	10.8683							123	843986	0	1.00445	-1.94136	0.00271666	-0.130001
124	349338	0	0.403006	394.727	-2.82046	11.6071							124	844025	0	1.00449	-1.94141	0.00163902	-0.102533
125	349381	0	0.403056	394.697	-2.69618	12.267							125	844039	0	1.00451	-1.94137	0.00082882	-0.0763249
126	349400	0	0.403078	394.668	-2.56562	12.8475							126	844006	0	1.00447	-1.9412	0.00027187	-0.0511793
127	349396	0	0.403073	394.641	-2.42963	13.3482							127	844004	0	1.00447	-1.94096	-3.696e-05	-0.027228
128	349461	0	0.403148	394.615	-2.28905	13.7695							128	843964	0	1.00442	-1.94077	-0.00010692	-0.00468504
129	349432	0	0.403115	394.592	-2.1447	14.1116							129	844018	0	1.00449	-1.94074	3.319e-05	0.0162362
130	349517	0	0.403213	394.57	-1.9974	14.3754							130	844080	0	1.00456	-1.94079	0.00036899	0.03561
131	349484	0	0.403175	394.55	-1.84797	14.5623							131	844045	0	1.00452	-1.94071	0.00089613	0.0535681
132	349519	0	0.403215	394.533	-1.6972	14.6748							132	844020	0	1.00449	-1.94056	0.00161403	0.0700205
133	349504	0	0.403198	394.517	-1.54584	14.7155							133	843924	0	1.00437	-1.94042	0.00249938	0.0847487
134	349606	0	0.403316	394.502	-1.39463	14.6873							134	844042	0	1.00451	-1.94053	0.00352399	0.0976085
135	349562	0	0.403265	394.49	-1.24426	14.5933							135	844046	0	1.00452	-1.94053	0.00466501	0.10871
136	349532	0	0.40323	394.48	-1.09542	14.4371							136	844069	0	1.00455	-1.94048	0.00591222	0.117944
137	349593	0	0.403301	394.471	-0.948702	14.2225							137	843933	0	1.00438	-1.94031	0.00725699	0.125049
138	349594	0	0.403302	394.464	-0.804647	13.9535							138	843993	0	1.00446	-1.94038	0.00867432	0.129721
139	349650	0	0.403366	394.458	-0.663777	13.6339							139	844012	0	1.00448	-1.94047	0.0101329	0.132001
140	349602	0	0.403311	394.455	-0.526578	13.2681							140	844023	0	1.00449	-1.94054	0.0116061	0.132049
141	349533	0	0.403231	394.453	-0.393498	12.8607							141	844013	0	1.00448	-1.94057	0.0130784	0.129921
142	349570	0	0.403274	394.452	-0.264942	12.4166							142	843993	0	1.00446	-1.94066	0.0145222	0.125529
143	349598	0	0.403306	394.452	-0.141262	11.9402							143	843978	0	1.00444	-1.94092	0.015902	0.118753
144	349562	0	0.403265	394.454	-0.0227789	11.4359							144	844031	0	1.0045	-1.94125	0.0171805	0.109767
145	349505	0	0.403199	394.457	0.0902273	10.9086							145	844000	0	1.00446	-1.94153	0.0183395	0.0987967
146	349544	0	0.403244	394.462	0.197541	10.3634							146	844003	0	1.00447	-1.94183	0.0193699	0.0859647
147	349551	0	0.403252	394.467	0.299018	9.80576							147	844005	0	1.00447	-1.94221	0.0202555	0.0712609
148	349545	0	0.403245	394.474	0.394568	9.24118							148	844045	0	1.00452	-1.94265	0.0209757	0.0549058
149	349559	0	0.403261	394.482	0.484126	8.67509							149	843993	0	1.00446	-1.94297	0.0215074	0.0371963
150	349503	0	0.403197	394.49	0.567665	8.11308							150	844078	0	1.00456	-1.94328	0.0218463	0.0183947
151	349531	0	0.403229	394.5	0.645252	7.56059							151	843994	0	1.00446	-1.94343	0.0219885	-0.00141149
152	349524	0	0.403221	394.51	0.717031	7.02241							152	844029	0	1.0045	-1.9437	0.0219219	-0.0222877
153	349456	0	0.403142	394.521	0.783194	6.50269							153	843971	0	1.00443	-1.94395	0.0216297	-0.0440837
154	349433	0	0.403116	394.532	0.844	6.0056							154	844053	0	1.00453	-1.94434	0.0211109	-0.0665489
155	349407	0	0.403086	394.544	0.899749	5.53529							155	844000	0	1.00446	-1.9446	0.0203655	-0.0893377
156	349406	0	0.403085	394.556	0.95079	5.09572							156	844027	0	1.0045	-1.94489	0.0193879	-0.112309
157	349410	0	0.403089	394.568	0.997499	4.68994							157	844023	0	1.00449	-1.94524	0.0181701	-0.1353
158	349430	0	0.403112	394.579	1.04023	4.32011							158	844045	0	1.00452	-1.94567	0.0166954	-0.157977
159	349438	0	0.403122	394.591	1.07934	3.98776							159	844002	0	1.00447	-1.94594	0.0149654	-0.179925
160	349452	0	0.403138	394.603	1.11524	3.69344							160	843995	0	1.00446	-1.94627	0.0129898	-0.200955
161	349434	0	0.403117	394.615	1.14836	3.43693							161	844018	0	1.00449	-1.94661	0.0107869	-0.220914
162	349466	0	0.403154	394.628	1.17915	3.21721							162	844034	0	1.0045	-1.94694	0.00836928	-0.239595
163	349418	0	0.403099	394.641	1.20804	3.03283							163	844115	0	1.0046	-1.94726	0.00575254	-0.256756
164	349332	0	0.402999	394.654	1.23544	2.88247							164	844040	0	1.00451	-1.94736	0.00296465	-0.272019
165	349321	0	0.402987	394.667	1.26172	2.76466							165	844021	0	1.00449	-1.94733	3.874e-05	-0.285217
166	349282	0	0.402942	394.679	1.28721	2.67686							166	844006	0	1.00447	-1.94728	-0.00300366	-0.296319
167	349248	0	0.402903	394.692	1.31218	2.61559							167	844028	0	1.0045	-1.94719	-0.00614421	-0.305348
168	349346	0	0.403016	394.704	1.33685	2.57671							168	844052	0	1.00453	-1.94709	-0.00936345	-0.312211
169	349326	0	0.402993	394.716	1.36144	2.55546							169	843985	0	1.00445	-1.94684	-0.0126406	-0.316835
170	349314	0	0.402979	394.729	1.38613	2.54688							170	844018	0	1.00449	-1.94664	-0.0159469	-0.319239
171	349322	0	0.402988	394.741	1.4111	2.54591							171	843997	0	1.00446	-1.94642	-0.0192607	-0.319499
172	349281	0	0.402941	394.755	1.43646	2.54758							172	844013	0	1.00448	-1.94632	-0.0225684	-0.317626
173	349276	0	0.402935	394.768	1.46223	2.54742							173	844000	0	1.00446	-1.94621	-0.0258549	-0.313528
174	349232	0	0.402884	394.782	1.48836	2.54122							174	844038	0	1.00451	-1.94608	-0.029096	-0.307169
175	349213	0	0.402862	394.796	1.5147	2.52448							175	844062	0	1.00454	-1.9458	-0.0322676	-0.298536
176	349247	0	0.402901	394.81	1.54107	2.49242							176	843996	0	1.00446	-1.9454	-0.0353441	-0.287808
177	349261	0	0.402918	394.825	1.56723	2.44022							177	844054	0	1.00453	-1.94503	-0.0383011	-0.275132
178	349235	0	0.402888	394.84	1.59292	2.36369							178	844050	0	1.00452	-1.94459	-0.0411188	-0.260535
179	349266	0	0.402923	394.856	1.61787	2.25955							179	844015	0	1.00448	-1.94399	-0.0437676	-0.244119
180	349226	0	0.402877	394.872	1.6418	2.12547							180	844064	0	1.00454	-1.94337	-0.0462237	-0.226138
181	349240	0	0.402893	394.889	1.66438	1.96038							181	843983	0	1.00444	-1.94258	-0.0484649	-0.206798
182	349184	0	0.402829	394.907	1.68522	1.76414							182	844011	0	1.00448	-1.94186	-0.0504839	-0.186358
183	349168	0	0.40281	394.926	1.70393	1.53734							183	844041	0	1.00451	-1.94121	-0.0522765	-0.165019
184	349147	0	0.402786	394.944	1.72011	1.28106							184	844054	0	1.00453	-1.94051	-0.0538326	-0.142927
185	349213	0	0.402862	394.963	1.73338	0.996527							185	843986	0	1.00445	-1.93982	-0.0551492	-0.120348
186	349168	0	0.40281	394.982	1.74341	0.685173							186	843996	0	1.00446	-1.93914	-0.0562325	-0.0975223
187	349116	0	0.40275	395.002	1.74994	0.349316							187	843974	0	1.00443	-1.93854	-0.0570834	-0.074646
188	349059	0	0.402684	395.023	1.75277	-0.00779232							188	844052	0	1.00453	-1.93793	-0.057707	-0.0517449
189	349091	0	0.402721	395.043	1.75171	-0.382319							189	843962	0	1.00442	-1.93721	-0.0581033	-0.0289185
190	349021	0	0.402641	395.064	1.74665	-0.769929							190	843968	0	1.00443	-1.93656	-0.05827	-0.00641102
191	348969	0	0.402581	395.084	1.73745	-1.16601							191	844033	0	1.0045	-1.93596	-0.0582093	0.0155344
192	348949	0	0.402558	395.104	1.72402	-1.56614							192	844013	0	1.00448	-1.93527	-0.0579264	0.036819
193	348956	0	0.402566	395.123	1.70629	-1.96616							193	844029	0	1.0045	-1.93452	-0.0574225	0.0573105
194	348967	0	0.402578	395.142	1.68428	-2.36229							194	843948	0	1.0044	-1.93375	-0.0566933	0.076881
195	348922	0	0.402526	395.161	1.65805	-2.75081							195	843983	0	1.00444	-1.93303	-0.0557467	0.0953297
196	348936	0	0.402543	395.18	1.62771	-3.12781							196	843962	0	1.00442	-1.93237	-0.054602	0.112385
197	348970	0	0.402582	395.198	1.59346	-3.4892							197	844016	0	1.00448	-1.93183	-0.053285	0.12792
198	348873	0	0.40247	395.217	1.55548	-3.83081							198	844024	0	1.00449	-1.93121	-0.0518143	0.141836
199	348819	0	0.402408	395.234	1.514	-4.14874							199	843943	0	1.0044	-1.93056	-0.0502061	0.153963
200	348834	0	0.402425	395.251	1.46929	-4.43966							200	843967	0	1.00442	-1.93008	-0.0484812	0.164047
201	348792	0	0.402376	395.267	1.42162	-4.70088							201	843983	0	1.00444	-1.92971	-0.0466638	0.17197
202	348813	0	0.402401	395.282	1.37131	-4.93049							202	844024	0	1.00449	-1.92947	-0.0447838	0.177684
203	348766	0	0.402346	395.297	1.31875	-5.12735							203	844065	0	1.00454	-1.92908	-0.042859	0.18125
204	348803	0	0.402389	395.31	1.26433	-5.29058							204	844007	0	1.00447	-1.92855	-0.040906	0.182602
205	348818	0	0.402406	395.322	1.20845	-5.41968							205	844006	0	1.00447	-1.92801	-0.0389469	0.181626
206	348825	0	0.402415	395.333	1.15152	-5.5146							206	843935	0	1.00439	-1.92751	-0.0370077	0.17821
207	348798	0	0.402383	395.344	1.09394	-5.57553							207	844037	0	1.00451	-1.92715	-0.0351103	0.172312
208	348843	0	0.402435	395.353	1.03605	-5.60322							208	843936	0	1.00439	-1.92667	-0.0332798	0.164009
209	348809	0	0.402396	395.363	0.978174	-5.59897							209	843985	0	1.00445	-1.92626	-0.0315351	0.153233
210	348801	0	0.402387	395.372	0.920607	-5.56419							210	843935	0	1.00439	-1.92588	-0.029902	0.140026
211	348794	0	0.402379	395.38	0.863643	-5.50039							211	843982	0	1.00444	-1.9256	-0.028411	0.124583
212	348798	0	0.402383	395.388	0.807541	-5.40942							212	843978	0	1.00444	-1.92539	-0.027096	0.107255
213	348764	0	0.402344	395.395	0.752553	-5.29274							213	843982	0	1.00444	-1.92533	-0.0259863	0.0883742
214	348730	0	0.402305	395.402	0.698926	-5.15156							214	844020	0	1.00449	-1.92533	-0.0251027	0.0683783
215	348702	0	0.402273	395.409	0.646874	-4.98713							215	843945	0	1.0044	-1.92528	-0.024471	0.0476659
216	348725	0	0.402299	395.414	0.596623	-4.80086							216	843977	0	1.00444	-1.92522	-0.0241028	0.0267628
217	348714	0	0.402286	395.42	0.548399	-4.59446							217	843960	0	1.00442	-1.92522	-0.0239969	0.00631087
218	348726	0	0.4023	395.424	0.502392	-4.36963							218	843973	0	1.00443	-1.92524	-0.0241371	-0.013045
219	348738	0	0.402314	395.428	0.458815	-4.12829							219	843966	0	1.00442	-1.92528	-0.0245054	-0.030617
220	348670	0	0.402236	395.431	0.417867	-3.87248							220	843984	0	1.00445	-1.92533	-0.0250744	-0.0457733
221	348716	0	0.402289	395.433	0.379719	-3.60437							221	844011	0	1.00448	-1.92528	-0.0258151	-0.0578016
222	348711	0	0.402283	395.435	0.344504	-3.32638							222	844011	0	1.00448	-1.92509	-0.0266904	-0.0660379
223	348680	0	0.402247	395.436	0.312308	-3.04105							223	843945	0	1.0044	-1.92477	-0.0276537	-0.0698961
224	348734	0	0.40231	395.437	0.283184	-2.75078							224	843996	0	1.00446	-1.92456	-0.0286614	-0.068948
225	348783	0	0.402366	395.438	0.257158	-2.45843							225	843958	0	1.00441	-1.92439	-0.0296604	-0.0627226
226	348753	0	0.402331	395.439	0.234228	-2.16682							226	843993	0	1.00446	-1.92429	-0.0305955	-0.0508375
227	348757	0	0.402336	395.44	0.214349	-1.87841							227	844012	0	1.00448	-1.92408	-0.0314072	-0.0328486
228	348748	0	0.402326	395.44	0.197457	-1.59535							228	843969	0	1.00443	-1.92371	-0.0320274	-0.00841975
229	348707	0	0.402278	395.441	0.183472	-1.31946							229	843965	0	1.00442	-1.92345	-0.0323844	0.0225794
230	348682	0	0.40225	395.442	0.172299	-1.05234							230	843935	0	1.00439	-1.92308	-0.0324109	0.0602708
231	348764	0	0.402344	395.442	0.163804	-0.795681							231	843995	0	1.00446	-1.92277	-0.0320321	0.104568
232	348688	0	0.402257	395.442	0.157849	-0.551287							232	844062	0	1.00454	-1.92238	-0.0311749	0.155261
233	348708	0	0.40228	395.442	0.15431	-0.320437							233	844046	0	1.00452	-1.92172	-0.029757	0.211973
234	348758	0	0.402337	395.442	0.153062	-0.104646							234	843999	0	1.00446	-1.9209	-0.0277008	0.274087
235	348720	0	0.402293	395.443	0.153973	0.0945887							235	843974	0	1.00443	-1.92002	-0.0249442	0.340789
236	348714	0	0.402286	395.443	0.156903	0.276093							236	843939	0	1.00439	-1.91915	-0.0214289	0.411245
237	348692	0	0.402261	395.443	0.161676	0.439114							237	844015	0	1.00448	-1.91838	-0.0171122	0.484477
238	348743	0	0.40232	395.444	0.168074	0.583189							238	843977	0	1.00444	-1.91754	-0.0119641	0.559446
239	348786	0	0.40237	395.444	0.175897	0.70775							239	843945	0	1.0044	-1.91668	-0.00597044	0.634962
240	348816	0	0.402404	395.445	0.184899	0.812429							240	843917	0	1.00437	-1.91595	0.00086311	0.709718
241	348785	0	0.402368	395.447	0.194823	0.897017							241	843939	0	1.00439	-1.91542	0.00851021	0.782488
242	348758	0	0.402337	395.449	0.20543	0.961758							242	843939	0	1.00439	-1.91502	0.0169385	0.852085
243	348747	0	0.402325	395.452	0.216498	1.00747							243	843922	0	1.00437	-1.91481	0.0261051	0.917322
244	348791	0	0.402375	395.454	0.227831	1.03566							244	843963	0	1.00442	-1.91479	0.0359586	0.97706
245	348742	0	0.402319	395.458	0.23924	1.04778							245	843959	0	1.00442	-1.91487	0.0464385	1.03028
246	348742	0	0.402319	395.461	0.250553	1.04592							246	843972	0	1.00443	-1.9151	0.0574653	1.07607
247	348698	0	0.402268	395.465	0.261615	1.03239							247	843883	0	1.00432	-1.91537	0.0689544	1.11374
248	348684	0	0.402252	395.469	0.272314	1.0092							248	843955	0	1.00441	-1.91587	0.0808213	1.14255
249	348683	0	0.402251	395.473	0.282573	0.978112							249	843996	0	1.00446	-1.91658	0.0929664	1.16182
250	348653	0	0.402216	395.476	0.292353	0.940554							250	843902	0	1.00435	-1.91735	0.105283	1.17102
251	348700	0	0.40227	395.479	0.30163	0.897893							251	843925	0	1.00437	-1.91839	0.117663	1.16978
252	348659	0	0.402223	395.483	0.310409	0.851426							252	843998	0	1.00446	-1.91962	0.129992	1.15794
253	348693	0	0.402262	395.486	0.31871	0.802581							253	843909	0	1.00436	-1.921	0.142159	1.1355
254	348641	0	0.402202	395.489	0.326533	0.752062							254	843969	0	1.00443	-1.92273	0.154044	1.10255
255	348669	0	0.402235	395.493	0.333871	0.700539							255	843971	0	1.00443	-1.92472	0.165524	1.05945
256	348676	0	0.402243	395.496	0.340698	0.648481							256	843937	0	1.00439	-1.92692	0.176482	1.00682
257	348671	0	0.402237	395.499	0.346987	0.59611							257	844019	0	1.00449	-1.9293	0.186812	0.945359
258	348673	0	0.402239	395.502	0.352724	0.543431							258	843988	0	1.00445	-1.93173	0.196418	0.875807
259	348704	0	0.402275	395.505	0.357924	0.490354							259	843982	0	1.00444	-1.93434	0.205215	0.798957
260	348708	0	0.40228	395.509	0.362561	0.437061							260	844021	0	1.00449	-1.93712	0.213127	0.715807
261	348727	0	0.402301	395.513	0.366637	0.383864							261	844046	0	1.00452	-1.93999	0.2201	0.62753
262	348684	0	0.402252	395.517	0.370171	0.331309							262	844004	0	1.00447	-1.94276	0.226102	0.535328
263	348627	0	0.402186	395.521	0.373163	0.279857							263	844035	0	1.00451	-1.94565	0.231106	0.440303
264	348710	0	0.402282	395.525	0.375621	0.229687							264	843993	0	1.00446	-1.9485	0.235089	0.343619
265	348685	0	0.402253	395.529	0.377552	0.180552							265	844057	0	1.00453	-1.95141	0.238034	0.246433
266	348648	0	0.40221	395.533	0.378981	0.132733							266	844058	0	1.00453	-1.95429	0.239941	0.149877
267	348672	0	0.402238	395.537	0.379935	0.0863282							267	844027	0	1.0045	-1.95712	0.240828	0.05493
268	348654	0	0.402217	395.54	0.380455	0.0412036							268	843961	0	1.00442	-1.96001	0.240721	-0.0375924
269	348682	0	0.40225	395.544	0.38057	-0.00241974							269	844076	0	1.00455	-1.96302	0.239648	-0.126832
270	348626	0	0.402185	395.548	0.380287	-0.044206							270	844079	0	1.00456	-1.96598	0.237652	-0.21185
271	348663	0	0.402228	395.552	0.379591	-0.0835608							271	844071	0	1.00455	-1.96887	0.234787	-0.291709
272	348652	0	0.402215	395.556	0.378489	-0.119973							272	844082	0	1.00456	-1.97163	0.231112	-0.3657
273	348671	0	0.402237	395.56	0.376997	-0.152931							273	844125	0	1.00461	-1.97432	0.226692	-0.433247
274	348651	0	0.402214	395.565	0.375115	-0.182116							274	844051	0	1.00452	-1.97688	0.221591	-0.493887
275	348653	0	0.402216	395.569	0.372873	-0.206706							275	844125	0	1.00461	-1.97935	0.215886	-0.547195
276	348607	0	0.402163	395.574	0.370316	-0.22573							276	844119	0	1.00461	-1.98159	0.209667	-0.59294
277	348606	0	0.402162	395.579	0.367525	-0.238196							277	844047	0	1.00452	-1.98376	0.203029	-0.631122
278	348574	0	0.402125	395.583	0.364584	-0.243158							278	844150	0	1.00464	-1.98588	0.196057	-0.66176
279	348575	0	0.402126	395.587	0.361583	-0.239875							279	844111	0	1.0046	-1.98786	0.188838	-0.684844
280	348575	0	0.402126	395.591	0.358601	-0.227579							280	844133	0	1.00462	-1.98973	0.181455	-0.700425
281	348577	0	0.402128	395.594	0.355765	-0.205842							281	844176	0	1.00467	-1.99145	0.173985	-0.708727
282	348578	0	0.40213	395.597	0.353199	-0.174528							282	844095	0	1.00458	-1.99295	0.166499	-0.710193
283	348632	0	0.402192	395.6	0.351007	-0.134017							283	844161	0	1.00466	-1.99454	0.159052	-0.70539
284	348542	0	0.402088	395.603	0.34931	-0.084859							284	844099	0	1.00458	-1.99589	0.151701	-0.694746
285	348543	0	0.402089	395.606	0.348212	-0.0276036							285	844124	0	1.00461	-1.99722	0.144511	-0.678864
286	348627	0	0.402186	395.609	0.347806	0.0372468							286	844116	0	1.0046	-1.99847	0.13754	-0.658428
287	348674	0	0.40224	395.611	0.348172	0.108494							287	844116	0	1.0046	-1.99963	0.130839	-0.63407
288	348538	0	0.402083	395.614	0.349373	0.184703							288	844138	0	1.00463	-2.00076	0.124443	-0.606405
289	348604	0	0.40216	395.617	0.351443	0.264776							289	844135	0	1.00462	-2.00177	0.118382	-0.575937
290	348631	0	0.402191	395.62	0.354401	0.347246							290	844161	0	1.00466	-2.00256	0.112688	-0.543284
291	348596	0	0.40215	395.623	0.35827	0.430615							291	844102	0	1.00459	-2.00328	0.107374	-0.509211
292	348613	0	0.40217	395.625	0.363071	0.513184							292	844124	0	1.00461	-2.00402	0.102443	-0.474496
293	348612	0	0.402169	395.628	0.368784	0.593317							293	844180	0	1.00468	-2.00476	0.0978962	-0.439751
294	348595	0	0.402149	395.632	0.375364	0.669496							294	844142	0	1.00463	-2.00539	0.0937304	-0.405539
295	348556	0	0.402104	395.635	0.38278	0.740566							295	844112	0	1.0046	-2.00605	0.0899395	-0.372389
296	348587	0	0.40214	395.638	0.39098	0.805165							296	844092	0	1.00457	-2.00671	0.086507	-0.340794
297	348585	0	0.402138	395.642	0.399885	0.861841							297	844195	0	1.0047	-2.00752	0.0834054	-0.311081
298	348644	0	0.402206	395.645	0.409388	0.909293							298	844126	0	1.00461	-2.00821	0.0806004	-0.283364
299	348581	0	0.402133	395.649	0.41937	0.946307							299	844152	0	1.00465	-2.0089	0.0780686	-0.257867
300	348558	0	0.402107	395.654	0.429713	0.972088							300	844146	0	1.00464	-2.00959	0.0757788	-0.234814
301	348542	0	0.402088	395.658	0.440311	0.985524							301	844153	0	1.00465	-2.01028	0.0736957	-0.214391
302	348572	0	0.402123	395.663	0.451021	0.985627							302	844141	0	1.00463	-2.01096	0.0717924	-0.19668
303	348509	0	0.40205	395.667	0.461691	0.971633							303	844223	0	1.00473	-2.01168	0.0700445	-0.181616
304	348549	0	0.402096	395.672	0.472186	0.943238							304	844114	0	1.0046	-2.01222	0.0684395	-0.169036
305	348478	0	0.402014	395.677	0.482341	0.900303							305	844148	0	1.00464	-2.01293	0.0669523	-0.158932
306	348539	0	0.402085	395.682	0.492014	0.84277							306	844180	0	1.00468	-2.01364	0.0655527	-0.151084
307	348528	0	0.402072	395.687	0.501043	0.770533							307	844099	0	1.00458	-2.01425	0.0642126	-0.145144
308	348511	0	0.402052	395.693	0.509255	0.683997							308	844154	0	1.00465	-2.01488	0.0629054	-0.140869
309	348531	0	0.402075	395.698	0.516482	0.583975							309	844135	0	1.00462	-2.01551	0.0616114	-0.138032
310	348551	0	0.402098	395.703	0.522576	0.471044							310	844131	0	1.00462	-2.01624	0.060316	-0.136482
311	348572	0	0.402123	395.709	0.527406	0.346196							311	844178	0	1.00468	-2.01703	0.0589968	-0.135869
312	348529	0	0.402073	395.715	0.530845	0.210623							312	844150	0	1.00464	-2.01781	0.0576487	-0.13582
313	348531	0	0.402075	395.722	0.532775	0.0660134							313	844176	0	1.00467	-2.01859	0.0562784	-0.136012
314	348501	0	0.402041	395.728	0.5331	-0.0856478							314	844175	0	1.00467	-2.01926	0.0548881	-0.136136
315	348495	0	0.402034	395.735	0.531768	-0.242336							315	844197	0	1.0047	-2.01991	0.0534807	-0.135955
316	348451	0	0.401983	395.741	0.528711	-0.402327							316	844163	0	1.00466	-2.02054	0.0520617	-0.13529
317	348467	0	0.402002	395.747	0.523885	-0.563739							317	844195	0	1.0047	-2.02105	0.050648	-0.133964
318	348523	0	0.402066	395.753	0.517289	-0.724591							318	844163	0	1.00466	-2.02138	0.0492543	-0.132021
319	348473	0	0.402008	395.759	0.508965	-0.882891							319	844204	0	1.00471	-2.02171	0.0478912	-0.129664
320	348526	0	0.40207	395.765	0.498977	-1.03644							320	844156	0	1.00465	-2.022	0.0465691	-0.126986
321	348530	0	0.402074	395.771	0.487401	-1.18338							321	844183	0	1.00468	-2.02227	0.0452968	-0.124072
322	348448	0	0.40198	395.777	0.474297	-1.32142							322	844158	0	1.00465	-2.02251	0.0440812	-0.121062
323	348456	0	0.401989	395.782	0.459757	-1.44816							323	844148	0	1.00464	-2.02289	0.0429211	-0.118175
324	348427	0	0.401955	395.788	0.443894	-1.56146							324	844199	0	1.0047	-2.02335	0.0418062	-0.115628
325	348452	0	0.401984	395.793	0.426828	-1.65958							325	844203	0	1.00471	-2.02379	0.0407187	-0.113623
326	348440	0	0.40197	395.798	0.408728	-1.74098							326	844201	0	1.0047	-2.02414	0.0396498	-0.112346
327	348369	0	0.401888	395.803	0.389763	-1.8042							327	844148	0	1.00464	-2.02445	0.038592	-0.112035
328	348404	0	0.401929	395.808	0.370141	-1.84755							328	844107	0	1.00459	-2.02485	0.0375343	-0.112914
329	348409	0	0.401935	395.812	0.350106	-1.8697							329	844189	0	1.00469	-2.02533	0.0364671	-0.115146
330	348409	0	0.401935	395.816	0.329913	-1.86974							330	844215	0	1.00472	-2.02574	0.035379	-0.118726
331	348412	0	0.401938	395.819	0.309816	-1.84689							331	844175	0	1.00467	-2.02599	0.0342564	-0.123632
332	348368	0	0.401887	395.822	0.290059	-1.80102							332	844193	0	1.00469	-2.02621	0.0330876	-0.130053
333	348393	0	0.401916	395.824	0.270898	-1.73246							333	844199	0	1.0047	-2.02644	0.0318527	-0.138107
334	348400	0	0.401924	395.826	0.252591	-1.64217							334	844127	0	1.00462	-2.02659	0.0305315	-0.147785
335	348404	0	0.401929	395.827	0.235394	-1.53178							335	844156	0	1.00465	-2.02689	0.0291036	-0.159185
336	348435	0	0.401965	395.828	0.219525	-1.4031							336	844231	0	1.00474	-2.02729	0.0275591	-0.172281
337	348418	0	0.401945	395.829	0.205201	-1.25787							337	844115	0	1.0046	-2.02764	0.0258828	-0.186886
338	348426	0	0.401954	395.83	0.192605	-1.09793							338	844144	0	1.00464	-2.02803	0.0240435	-0.202784
339	348392	0	0.401915	395.83	0.181869	-0.925345							339	844137	0	1.00463	-2.02844	0.0220192	-0.219622
340	348468	0	0.402003	395.831	0.17308	-0.742403							340	844236	0	1.00475	-2.02899	0.0198001	-0.237052
341	348422	0	0.40195	395.831	0.166292	-0.55186							341	844150	0	1.00464	-2.02938	0.0173648	-0.25472
342	348459	0	0.401992	395.831	0.161541	-0.356332							342	844198	0	1.0047	-2.02981	0.0147053	-0.272356
343	348480	0	0.402017	395.832	0.158872	-0.158614							343	844275	0	1.00479	-2.03031	0.0118301	-0.289592
344	348414	0	0.40194	395.832	0.158308	0.0383787							344	844223	0	1.00473	-2.0306	0.00875352	-0.305898
345	348411	0	0.401937	395.833	0.159856	0.232139							345	844168	0	1.00466	-2.03073	0.00549802	-0.320853
346	348352	0	0.401869	395.834	0.163503	0.42052							346	844203	0	1.00471	-2.03096	0.00208517	-0.33412
347	348355	0	0.401872	395.834	0.169171	0.601684							347	844223	0	1.00473	-2.03111	-0.00146286	-0.345177
348	348401	0	0.401925	395.834	0.176766	0.77374							348	844194	0	1.0047	-2.03111	-0.0051236	-0.353666
349	348463	0	0.401997	395.835	0.186167	0.934576							349	844186	0	1.00469	-2.03101	-0.00886815	-0.359523
350	348455	0	0.401988	395.835	0.197211	1.08219							350	844165	0	1.00466	-2.03082	-0.0126642	-0.362734
351	348467	0	0.402002	395.836	0.209725	1.2148							351	844159	0	1.00465	-2.03063	-0.0164832	-0.363427
352	348438	0	0.401968	395.838	0.223542	1.33081							352	844186	0	1.00469	-2.03051	-0.0202943	-0.361683
353	348393	0	0.401916	395.84	0.238494	1.42942							353	844220	0	1.00473	-2.03027	-0.0240564	-0.35742
354	348431	0	0.40196	395.842	0.25439	1.51034							354	844175	0	1.00467	-2.02994	-0.0277347	-0.350629
355	348471	0	0.402006	395.845	0.271021	1.57366							355	844214	0	1.00472	-2.02963	-0.0313127	-0.341447
356	348401	0	0.401925	395.848	0.288171	1.62013							356	844223	0	1.00473	-2.02919	-0.0347745	-0.329894
357	348411	0	0.401937	395.851	0.305632	1.65073							357	844216	0	1.00472	-2.02856	-0.0381132	-0.316049
358	348397	0	0.401921	395.855	0.3232	1.66637							358	844103	0	1.00459	-2.02789	-0.0413168	-0.300212
359	348381	0	0.401902	395.859	0.340701	1.66795							359	844113	0	1.0046	-2.02727	-0.0443533	-0.282833
360	348408	0	0.401933	395.862	0.358007	1.65662							360	844227	0	1.00473	-2.02679	-0.047199	-0.264326
361	348437	0	0.401967	395.866	0.375006	1.63369							361	844138	0	1.00463	-2.02618	-0.0498417	-0.244827
362	348374	0	0.401894	395.871	0.391626	1.601							362	844173	0	1.00467	-2.02564	-0.0522516	-0.224462
363	348401	0	0.401925	395.875	0.407813	1.56049							363	844270	0	1.00479	-2.02504	-0.0544091	-0.203313
364	348360	0	0.401878	395.88	0.423507	1.51416							364	844219	0	1.00472	-2.02422	-0.0563197	-0.181526
365	348349	0	0.401865	395.885	0.438649	1.46405							365	844155	0	1.00465	-2.0234	-0.0579964	-0.159478
366	348370	0	0.40189	395.89	0.453184	1.41173							366	844227	0	1.00473	-2.02267	-0.0594537	-0.137426
367	348362	0	0.40188	395.894	0.467063	1.35843							367	844135	0	1.00462	-2.02174	-0.060692	-0.115564
368	348391	0	0.401914	395.899	0.480291	1.305							368	844113	0	1.0046	-2.02089	-0.06171	-0.0943919
369	348342	0	0.401857	395.905	0.492891	1.25226							369	844151	0	1.00464	-2.02025	-0.0625107	-0.0742158
370	348415	0	0.401942	395.911	0.504899	1.20109							370	844192	0	1.00469	-2.01966	-0.0630998	-0.0548888
371	348355	0	0.401872	395.916	0.516388	1.15246							371	844144	0	1.00464	-2.0191	-0.0634906	-0.0361329
372	348317	0	0.401828	395.922	0.527415	1.10726							372	844157	0	1.00465	-2.01848	-0.0636902	-0.0176375
373	348352	0	0.401869	395.928	0.538018	1.06639							373	844100	0	1.00458	-2.01778	-0.0637094	0.00074539
374	348368	0	0.401887	395.933	0.548226	1.03007							374	844167	0	1.00466	-2.01723	-0.0635786	0.0189914
375	348281	0	0.401787	395.939	0.558085	0.998054							375	844170	0	1.00467	-2.01669	-0.0633149	0.0371362
376	348332	0	0.401846	395.944	0.567637	0.969848							376	844186	0	1.00469	-2.01608	-0.0629064	0.0552809
377	348352	0	0.401869	395.949	0.576943	0.944278							377	844132	0	1.00462	-2.01537	-0.0623324	0.0734262
378	348347	0	0.401863	395.955	0.586055	0.920121							378	844161	0	1.00466	-2.01481	-0.0615702	0.0914649
379	348311	0	0.401822	395.961	0.59503	0.896165							379	844138	0	1.00463	-2.01434	-0.0606025	0.109518
380	348345	0	0.401861	395.967	0.6039	0.871328							380	844201	0	1.0047	-2.01376	-0.059431	0.127963
381	348270	0	0.401774	395.973	0.612657	0.844283							381	844201	0	1.0047	-2.01292	-0.0580544	0.147072
382	348304	0	0.401813	395.979	0.621281	0.813724							382	844104	0	1.00459	-2.01201	-0.0564661	0.166675
383	348217	0	0.401713	395.985	0.629701	0.777908							383	844150	0	1.00464	-2.0112	-0.0546795	0.186429
384	348272	0	0.401777	395.991	0.637829	0.735062							384	844150	0	1.00464	-2.01039	-0.0527144	0.206007
385	348325	0	0.401838	395.997	0.645557	0.683261							385	844155	0	1.00465	-2.00975	-0.0505672	0.22511
386	348276	0	0.401781	396.003	0.652785	0.620613							386	844171	0	1.00467	-2.0092	-0.048223	0.243645
387	348280	0	0.401786	396.009	0.659399	0.545777							387	844113	0	1.0046	-2.00861	-0.0456664	0.261454
388	348262	0	0.401765	396.016	0.665284	0.457773							388	844140	0	1.00463	-2.00824	-0.0429054	0.278389
389	348303	0	0.401812	396.023	0.670292	0.356188							389	844178	0	1.00468	-2.0079	-0.0399609	0.294638
390	348242	0	0.401742	396.03	0.674262	0.240724							390	844151	0	1.00464	-2.00743	-0.0368494	0.31038
391	348287	0	0.401794	396.037	0.677022	0.111507							391	844223	0	1.00473	-2.0069	-0.0335893	0.325401
392	348254	0	0.401756	396.045	0.678373	-0.0314968							392	844077	0	1.00456	-2.00623	-0.0301937	0.339279
393	348279	0	0.401785	396.052	0.67815	-0.187939							393	844083	0	1.00456	-2.00571	-0.0266799	0.351537
394	348283	0	0.401789	396.06	0.676214	-0.357475							394	844144	0	1.00464	-2.00535	-0.0230595	0.361948
395	348258	0	0.40176	396.068	0.672444	-0.53929							395	844120	0	1.00461	-2.00501	-0.0193229	0.370531
396	348251	0	0.401752	396.076	0.666716	-0.732172							396	844101	0	1.00458	-2.00475	-0.0154688	0.377295
397	348215	0	0.401711	396.084	0.658938	-0.934481							397	844078	0	1.00456	-2.00462	-0.0115192	0.382238
398	348184	0	0.401675	396.092	0.649006	-1.14384							398	844173	0	1.00467	-2.00466	-0.00750947	0.38547
399	348212	0	0.401707	396.099	0.636846	-1.35797							399	844181	0	1.00468	-2.0046	-0.00348188	0.387277
400	348196	0	0.401689	396.107	0.622387	-1.57437							400	844075	0	1.00455	-2.00446	0.00052834	0.387725
401	348226	0	0.401724	396.114	0.605577	-1.79053							401	844069	0	1.00455	-2.00451	0.00450287	0.386589
402	348190	0	0.401682	396.122	0.586402	-2.00339							402	844111	0	1.0046	-2.00476	0.00842597	0.383705
403	348137	0	0.401621	396.129	0.564884	-2.20998							403	844161	0	1.00466	-2.00518	0.0122793	0.379236
404	348157	0	0.401644	396.136	0.541113	-2.40691							404	844122	0	1.00461	-2.00557	0.0160627	0.373569
405	348137	0	0.401621	396.143	0.515194	-2.59089							405	844177	0	1.00467	-2.00599	0.0197933	0.367138
406	348169	0	0.401658	396.15	0.487289	-2.75849							406	844170	0	1.00467	-2.00634	0.0234676	0.360304
407	348106	0	0.401585	396.156	0.457581	-2.90608							407	844155	0	1.00465	-2.00667	0.0270679	0.353272
408	348096	0	0.401574	396.162	0.426309	-3.03058							408	844182	0	1.00468	-2.00706	0.0305758	0.3462
409	348105	0	0.401584	396.167	0.39374	-3.1293							409	844179	0	1.00468	-2.00733	0.0339892	0.339213
410	348044	0	0.401514	396.171	0.360177	-3.20024							410	844122	0	1.00461	-2.00748	0.0373188	0.332125
411	348169	0	0.401658	396.175	0.325939	-3.24126							411	844104	0	1.00459	-2.00778	0.0405747	0.324568
412	348113	0	0.401593	396.178	0.291369	-3.25098							412	844136	0	1.00463	-2.00823	0.0437648	0.316414
413	348139	0	0.401623	396.18	0.256848	-3.22804							413	844131	0	1.00462	-2.00887	0.0468955	0.30772
414	348146	0	0.401631	396.182	0.222732	-3.17186							414	844153	0	1.00465	-2.00945	0.0499699	0.298653
415	348153	0	0.401639	396.184	0.189368	-3.08208							415	844205	0	1.00471	-2.00997	0.0529849	0.289203
416	348163	0	0.401651	396.185	0.157084	-2.9585							416	844145	0	1.00464	-2.01043	0.0559176	0.279153
417	348139	0	0.401623	396.185	0.126242	-2.80139							417	844133	0	1.00462	-2.01094	0.0587415	0.268243
418	348167	0	0.401655	396.186	0.0971713	-2.61156							418	844127	0	1.00462	-2.0114	0.0614373	0.256305
419	348087	0	0.401563	396.186	0.070216	-2.39068							419	844120	0	1.00461	-2.01189	0.0639943	0.243014
420	348113	0	0.401593	396.186	0.0456857	-2.14031							420	844134	0	1.00462	-2.01254	0.0664141	0.227981
421	348082	0	0.401557	396.185	0.0238907	-1.86248							421	844176	0	1.00467	-2.01333	0.0686935	0.211014
422	348143	0	0.401628	396.184	0.00515653	-1.55955							422	844107	0	1.00459	-2.01404	0.0708172	0.192176
423	348115	0	0.401595	396.182	-0.0102281	-1.23504							423	844173	0	1.00467	-2.01484	0.0727639	0.171584
424	348128	0	0.40161	396.179	-0.0220179	-0.892722							424	844186	0	1.00469	-2.01563	0.0745214	0.149275
425	348140	0	0.401624	396.177	-0.0300343	-0.536954							425	844116	0	1.0046	-2.01639	0.0760572	0.125229
426	348061	0	0.401533	396.174	-0.034105	-0.172219							426	844151	0	1.00464	-2.01719	0.0773276	0.0993226
427	348147	0	0.401632	396.17	-0.0341295	0.196526							427	844165	0	1.00466	-2.0181	0.0783066	0.0715207
428	348187	0	0.401679	396.167	-0.0300624	0.56362							428	844191	0	1.00469	-2.01906	0.0789788	0.0418688
429	348161	0	0.401649	396.164	-0.0219626	0.923722							429	844153	0	1.00465	-2.01994	0.0793315	0.0105635
430	348118	0	0.401599	396.161	-0.00995527	1.27173							430	844105	0	1.00459	-2.02097	0.0793503	-0.022254
431	348172	0	0.401661	396.159	0.00578157	1.60318							431	844206	0	1.00471	-2.02218	0.0790218	-0.0560992
432	348195	0	0.401688	396.157	0.0250193	1.91313							432	844178	0	1.00468	-2.02331	0.0783328	-0.0902935
433	348196	0	0.401689	396.155	0.0474738	2.19727							433	844208	0	1.00471	-2.0244	0.077276	-0.124276
434	348167	0	0.401655	396.154	0.0727909	2.4516							434	844142	0	1.00463	-2.02539	0.0758414	-0.157569
435	348151	0	0.401637	396.154	0.100619	2.67308							435	844170	0	1.00467	-2.02643	0.0740315	-0.189779
436	348189	0	0.401681	396.154	0.13059	2.85913							436	844210	0	1.00471	-2.02743	0.0718509	-0.220507
437	348164	0	0.401652	396.155	0.162347	3.00725							437	844218	0	1.00472	-2.02839	0.0693253	-0.249332
438	348196	0	0.401689	396.156	0.19547	3.11556							438	844124	0	1.00461	-2.02924	0.0664924	-0.275797
439	348127	0	0.401609	396.157	0.229543	3.18288							439	844195	0	1.0047	-2.03022	0.0633934	-0.299588
440	348175	0	0.401665	396.159	0.26413	3.20909							440	844209	0	1.00471	-2.03106	0.0600705	-0.32014
441	348177	0	0.401667	396.161	0.298807	3.19399							441	844200	0	1.0047	-2.03177	0.056558	-0.336979
442	348266	0	0.40177	396.164	0.333141	3.13795							442	844215	0	1.00472	-2.03238	0.0528895	-0.349738
443	348219	0	0.401715	396.168	0.366652	3.04178							443	844219	0	1.00472	-2.03293	0.0491019	-0.358281
444	348212	0	0.401707	396.173	0.398886	2.90769							444	844235	0	1.00474	-2.03331	0.0452371	-0.362602
445	348162	0	0.40165	396.178	0.42942	2.73848							445	844177	0	1.00467	-2.03357	0.0413255	-0.362753
446	348245	0	0.401745	396.184	0.457882	2.53763							446	844142	0	1.00463	-2.03384	0.0374246	-0.358877
447	348200	0	0.401694	396.191	0.483897	2.30919							447	844227	0	1.00473	-2.0342	0.0335941	-0.351065
448	348110	0	0.40159	396.199	0.507144	2.05797							448	844199	0	1.0047	-2.03445	0.0298823	-0.339398
449	348125	0	0.401607	396.208	0.527361	1.78985							449	844154	0	1.00465	-2.03464	0.0263316	-0.323916
450	348062	0	0.401534	396.216	0.544393	1.51065							450	844261	0	1.00477	-2.03491	0.0229801	-0.30484
451	348109	0	0.401589	396.224	0.55816	1.22613							451	844183	0	1.00468	-2.03491	0.0198631	-0.282272
452	348096	0	0.401574	396.233	0.568645	0.941532							452	844217	0	1.00472	-2.03479	0.0170053	-0.25676
453	348047	0	0.401517	396.241	0.57591	0.662515							453	844218	0	1.00472	-2.03469	0.0144302	-0.228951
454	348027	0	0.401494	396.249	0.580098	0.39429							454	844198	0	1.0047	-2.03452	0.0121618	-0.199439
455	347999	0	0.401462	396.257	0.581434	0.141619							455	844196	0	1.0047	-2.03437	0.010232	-0.168802
456	348065	0	0.401538	396.264	0.580164	-0.0915687							456	844150	0	1.00464	-2.03414	0.00865632	-0.137576
457	348007	0	0.401471	396.271	0.576556	-0.301946							457	844185	0	1.00468	-2.034	0.00745283	-0.106268
458	348023	0	0.401489	396.277	0.570866	-0.486387							458	844187	0	1.00469	-2.03391	0.00661344	-0.0752497
459	348075	0	0.401549	396.283	0.563399	-0.642502							459	844236	0	1.00475	-2.03388	0.00611996	-0.044938
460	348068	0	0.401541	396.289	0.554459	-0.768776							460	844137	0	1.00463	-2.03363	0.00594957	-0.0157112
461	348020	0	0.401486	396.295	0.544355	-0.864716							461	844190	0	1.00469	-2.03355	0.00607534	0.0117419
462	348093	0	0.40157	396.301	0.533405	-0.929934							462	844182	0	1.00468	-2.03346	0.00647102	0.0368727
463	348021	0	0.401487	396.306	0.521926	-0.964475							463	844205	0	1.00471	-2.03348	0.00711102	0.0591328
464	348037	0	0.401505	396.312	0.510278	-0.968606							464	844174	0	1.00467	-2.03347	0.00797537	0.0782617
465	348010	0	0.401474	396.317	0.49881	-0.943566							465	844204	0	1.00471	-2.03355	0.00903767	0.0941034
466	347969	0	0.401427	396.321	0.487845	-0.890939							466	844172	0	1.00467	-2.03361	0.0102764	0.106526
467	348035	0	0.401503	396.325	0.477668	-0.812853							467	844245	0	1.00476	-2.03371	0.011641	0.115502
468	347972	0	0.401431	396.328	0.468572	-0.712181							468	844218	0	1.00472	-2.03367	0.013081	0.120989
469	347979	0	0.401439	396.331	0.460819	-0.59241							469	844172	0	1.00467	-2.03362	0.0145488	0.122883
470	348025	0	0.401492	396.334	0.454633	-0.458048							470	844184	0	1.00468	-2.03368	0.0160049	0.120934
471	348031	0	0.401499	396.336	0.450171	-0.313855							471	844143	0	1.00463	-2.03375	0.0174124	0.115074
472	348041	0	0.40151	396.338	0.447546	-0.164494							472	844155	0	1.00465	-2.03402	0.0187327	0.105183
473	348026	0	0.401493	396.341	0.446813	-0.0141792							473	844248	0	1.00476	-2.03444	0.0199356	0.0916108
474	348044	0	0.401514	396.344	0.447943	0.132711							474	844194	0	1.0047	-2.03483	0.0209897	0.0747644
475	348024	0	0.40149	396.347	0.450837	0.272101							475	844212	0	1.00472	-2.03521	0.021857	0.0550682
476	347994	0	0.401456	396.35	0.455312	0.400369							476	844170	0	1.00467	-2.03555	0.0224874	0.0329025
477	348014	0	0.401479	396.354	0.461147	0.514331							477	844215	0	1.00472	-2.03602	0.0228465	0.00864405
478	348011	0	0.401475	396.358	0.468105	0.611204							478	844203	0	1.00471	-2.03639	0.0228984	-0.0172681
479	348026	0	0.401493	396.363	0.475967	0.68861							479	844206	0	1.00471	-2.03681	0.0226343	-0.0445591
480	348002	0	0.401465	396.368	0.484497	0.744868							480	844164	0	1.00466	-2.03721	0.0220528	-0.072847
481	347990	0	0.401451	396.373	0.493471	0.779144							481	844216	0	1.00472	-2.03778	0.021157	-0.101672
482	347979	0	0.401439	396.378	0.502677	0.791607							482	844170	0	1.00467	-2.03824	0.0199531	-0.13029
483	348003	0	0.401466	396.384	0.51189	0.782767							483	844251	0	1.00476	-2.03872	0.0184497	-0.158087
484	347968	0	0.401426	396.389	0.520891	0.753243							484	844178	0	1.00468	-2.03901	0.0166605	-0.1844
485	347898	0	0.401345	396.395	0.529446	0.703731							485	844195	0	1.0047	-2.03937	0.0145885	-0.208916
486	347982	0	0.401442	396.4	0.537327	0.635284							486	844168	0	1.00466	-2.03964	0.0122481	-0.231387
487	347995	0	0.401457	396.406	0.544334	0.549077							487	844198	0	1.0047	-2.0399	0.00965635	-0.251574
488	347961	0	0.401418	396.412	0.550305	0.446566							488	844220	0	1.00473	-2.04006	0.00685255	-0.269327
489	347997	0	0.401459	396.418	0.555079	0.329925							489	844208	0	1.00471	-2.04024	0.00387602	-0.284458
490	347989	0	0.40145	396.425	0.558494	0.201831							490	844241	0	1.00475	-2.04048	0.00077034	-0.296764
491	347951	0	0.401406	396.432	0.560414	0.0657062							491	844214	0	1.00472	-2.04059	-0.00243556	-0.305863
492	347893	0	0.401339	396.439	0.560731	-0.0746372							492	844204	0	1.00471	-2.04061	-0.0057137	-0.31154
493	347982	0	0.401442	396.446	0.55936	-0.21557							493	844256	0	1.00477	-2.04053	-0.00903195	-0.31361
494	347926	0	0.401377	396.453	0.556265	-0.353925							494	844245	0	1.00476	-2.04029	-0.012366	-0.31225
495	347881	0	0.401326	396.461	0.551481	-0.486541							495	844169	0	1.00467	-2.03999	-0.0156853	-0.307663
496	347911	0	0.40136	396.468	0.54511	-0.610204							496	844188	0	1.00469	-2.03973	-0.0189512	-0.300128
497	347879	0	0.401323	396.475	0.53733	-0.722081							497	844254	0	1.00477	-2.03951	-0.0221151	-0.28983
498	347843	0	0.401282	396.481	0.528371	-0.819544							498	844200	0	1.0047	-2.03913	-0.0251368	-0.27693
499	347861	0	0.401302	396.487	0.518466	-0.900204							499	844266	0	1.00478	-2.03882	-0.0279769	-0.261682
500	347849	0	0.401289	396.493	0.507834	-0.962272							500	844200	0	1.0047	-2.03832	-0.0306174	-0.244169
501	347831	0	0.401268	396.498	0.496694	-1.00469							501	844243	0	1.00475	-2.03776	-0.0330435	-0.224641
502	347859	0	0.4013	396.502	0.48527	-1.0273							502	844196	0	1.0047	-2.03709	-0.035245	-0.203461
503	347922	0	0.401373	396.506	0.473765	-1.03103							503	844169	0	1.00467	-2.03644	-0.0372152	-0.18117
504	347880	0	0.401324	396.51	0.462386	-1.0174							504	844161	0	1.00466	-2.03575	-0.0389453	-0.15822
505	347927	0	0.401379	396.514	0.451335	-0.987885							505	844200	0	1.0047	-2.03523	-0.0404338	-0.135113
506	347850	0	0.40129	396.518	0.440793	-0.943971							506	844148	0	1.00464	-2.03465	-0.0416663	-0.112038
507	347905	0	0.401353	396.522	0.430919	-0.887374							507	844121	0	1.00461	-2.03413	-0.0426422	-0.0891204
508	347821	0	0.401256	396.526	0.421835	-0.820199							508	844145	0	1.00464	-2.03371	-0.0433666	-0.0664738
509	347842	0	0.401281	396.53	0.413607	-0.744775							509	844206	0	1.00471	-2.03334	-0.0438555	-0.0441005
510	347839	0	0.401277	396.533	0.406283	-0.66396							510	844247	0	1.00476	-2.03294	-0.0441231	-0.022116
511	347828	0	0.401264	396.536	0.39992	-0.58118							511	844202	0	1.0047	-2.03241	-0.0441905	-0.00066479
512	347817	0	0.401252	396.539	0.394558	-0.500184							512	844169	0	1.00467	-2.03188	-0.0440619	0.0199714
513	347827	0	0.401263	396.541	0.390209	-0.424857							513	844171	0	1.00467	-2.0314	-0.0437379	0.039604
514	347851	0	0.401291	396.544	0.386846	-0.358862							514	844228	0	1.00474	-2.03097	-0.0432219	0.0580814
515	347798	0	0.40123	396.546	0.384392	-0.305315							515	844189	0	1.00469	-2.03051	-0.0425072	0.0754256
516	347819	0	0.401254	396.549	0.382711	-0.267179							516	844171	0	1.00467	-2.03009	-0.0415992	0.0916139
517	347889	0	0.401335	396.551	0.381594	-0.247661							517	844207	0	1.00471	-2.02961	-0.0405136	0.106679
518	347898	0	0.401345	396.554	0.380771	-0.249692							518	844202	0	1.0047	-2.02904	-0.0392698	0.120518
519	347847	0	0.401286	396.557	0.379936	-0.275773							519	844235	0	1.00474	-2.02852	-0.0378897	0.132919
520	347851	0	0.401291	396.561	0.378771	-0.327956							520	844173	0	1.00467	-2.02793	-0.0363968	0.143705
521	347918	0	0.401368	396.565	0.376969	-0.407449							521	844146	0	1.00464	-2.02753	-0.0348044	0.15254
522	347877	0	0.401321	396.569	0.374222	-0.514665							522	844227	0	1.00473	-2.02725	-0.0331295	0.159291
523	347851	0	0.401291	396.574	0.3702	-0.648911							523	844189	0	1.00469	-2.02688	-0.031389	0.163962
524	347815	0	0.401249	396.58	0.364595	-0.808442							524	844129	0	1.00462	-2.02656	-0.0295998	0.166568
525	347770	0	0.401197	396.585	0.357117	-0.990918							525	844226	0	1.00473	-2.0263	-0.0277876	0.167146
526	347821	0	0.401256	396.59	0.347491	-1.19372							526	844166	0	1.00466	-2.02595	-0.0259773	0.165803
527	347828	0	0.401264	396.595	0.335498	-1.41415							527	844149	0	1.00464	-2.02565	-0.0242025	0.162481
528	347831	0	0.401268	396.6	0.320951	-1.64906							528	844164	0	1.00466	-2.02543	-0.0224844	0.157072
529	347811	0	0.401245	396.605	0.303725	-1.89459							529	844137	0	1.00463	-2.02514	-0.0208382	0.149491
530	347871	0	0.401314	396.609	0.283758	-2.14657							530	844164	0	1.00466	-2.02488	-0.0192816	0.139599
531	347760	0	0.401186	396.614	0.261026	-2.40054							531	844177	0	1.00467	-2.0247	-0.0178322	0.127443
532	347747	0	0.401171	396.619	0.235525	-2.65158							532	844164	0	1.00466	-2.02457	-0.0165004	0.113178
533	347769	0	0.401196	396.623	0.207271	-2.89484							533	844157	0	1.00465	-2.02448	-0.0153067	0.0970338
534	347743	0	0.401166	396.627	0.176335	-3.12563							534	844192	0	1.00469	-2.02442	-0.0142808	0.0792314
535	347764	0	0.401191	396.631	0.142849	-3.33953							535	844164	0	1.00466	-2.02435	-0.01345	0.0599797
536	347742	0	0.401165	396.634	0.107007	-3.53255							536	844176	0	1.00467	-2.02434	-0.0128479	0.0395367
537	347742	0	0.401165	396.637	0.0690522	-3.70095							537	844123	0	1.00461	-2.02431	-0.0124945	0.0182023
538	347708	0	0.401126	396.639	0.0293015	-3.841							538	844137	0	1.00463	-2.02437	-0.012396	-0.00376933
539	347760	0	0.401186	396.64	-0.0118826	-3.9492							539	844205	0	1.00471	-2.02463	-0.0125584	-0.0260145
540	347673	0	0.401086	396.641	-0.0541249	-4.02276							540	844201	0	1.0047	-2.02489	-0.0129766	-0.0479994
541	347754	0	0.401179	396.64	-0.0970185	-4.0595							541	844250	0	1.00476	-2.02517	-0.0136406	-0.0691783
542	347764	0	0.401191	396.639	-0.140149	-4.05821							542	844189	0	1.00469	-2.02524	-0.0145372	-0.0889162
543	347725	0	0.401146	396.637	-0.183088	-4.01835							543	844140	0	1.00463	-2.0252	-0.0156479	-0.106759
544	347760	0	0.401186	396.634	-0.225395	-3.94037							544	844218	0	1.00472	-2.02526	-0.0169527	-0.12244
545	347750	0	0.401174	396.63	-0.266633	-3.82559							545	844146	0	1.00464	-2.02518	-0.0184284	-0.135619
546	347753	0	0.401178	396.626	-0.306395	-3.67564							546	844212	0	1.00472	-2.02507	-0.0200408	-0.146079
547	347777	0	0.401206	396.622	-0.344291	-3.49274							547	844180	0	1.00468	-2.02486	-0.0217514	-0.153689
548	347744	0	0.401167	396.616	-0.379979	-3.27945							548	844209	0	1.00471	-2.02465	-0.0235179	-0.158351
549	347839	0	0.401277	396.61	-0.41315	-3.03894							549	844148	0	1.00464	-2.02433	-0.0253056	-0.159921
550	347786	0	0.401216	396.604	-0.443543	-2.7748							550	844163	0	1.00466	-2.02401	-0.0270888	-0.158267
551	347823	0	0.401259	396.597	-0.470954	-2.49108							551	844182	0	1.00468	-2.0237	-0.0288327	-0.153275
552	347789	0	0.401219	396.59	-0.495202	-2.19193							552	844156	0	1.00465	-2.02334	-0.030506	-0.144954
553	347815	0	0.401249	396.583	-0.516147	-1.88173							553	844156	0	1.00465	-2.02298	-0.0320832	-0.133462
554	347822	0	0.401257	396.575	-0.533683	-1.56479							554	844179	0	1.00468	-2.02256	-0.0335393	-0.119023
555	347815	0	0.401249	396.568	-0.54776	-1.24523							555	844196	0	1.0047	-2.02211	-0.0348385	-0.101926
556	347823	0	0.401259	396.56	-0.558371	-0.926933							556	844153	0	1.00465	-2.02158	-0.0359447	-0.0824062
557	347827	0	0.401263	396.552	-0.565562	-0.613483							557	844146	0	1.00464	-2.02102	-0.0368214	-0.0608599
558	347834	0	0.401271	396.545	-0.569427	-0.308396							558	844151	0	1.00464	-2.02052	-0.0374353	-0.0376945
559	347886	0	0.401331	396.537	-0.570098	-0.0148027							559	844237	0	1.00475	-2.02002	-0.0377668	-0.0132307
560	347886	0	0.401331	396.53	-0.567754	0.264297							560	844214	0	1.00472	-2.01932	-0.0378007	0.0122115
561	347912	0	0.401361	396.523	-0.562577	0.526533							561	844180	0	1.00468	-2.01853	-0.0375367	0.0381849
562	347886	0	0.401331	396.516	-0.554775	0.769817							562	844150	0	1.00464	-2.01775	-0.0369776	0.0642015
563	347892	0	0.401338	396.51	-0.544572	0.992691							563	844135	0	1.00462	-2.01707	-0.0361359	0.0897526
564	347871	0	0.401314	396.504	-0.532209	1.19411							564	844139	0	1.00463	-2.01655	-0.0350293	0.114347
565	347838	0	0.401276	396.498	-0.517924	1.37359							565	844127	0	1.00462	-2.01609	-0.0336709	0.137741
566	347957	0	0.401413	396.493	-0.501967	1.53131							566	844134	0	1.00462	-2.01576	-0.032074	0.159687
567	347937	0	0.40139	396.487	-0.484576	1.66747							567	844123	0	1.00461	-2.01548	-0.0302563	0.18009
568	347935	0	0.401388	396.483	-0.465993	1.78266							568	844183	0	1.00468	-2.01532	-0.0282406	0.198875
569	347869	0	0.401312	396.478	-0.446439	1.87777							569	844177	0	1.00467	-2.01516	-0.0260511	0.216036
570	347957	0	0.401413	396.474	-0.426134	1.95409							570	844134	0	1.00462	-2.01494	-0.0237136	0.231565
571	347928	0	0.40138	396.47	-0.405267	2.01277							571	844199	0	1.0047	-2.01473	-0.0212378	0.245377
572	347922	0	0.401373	396.466	-0.383996	2.05536							572	844154	0	1.00465	-2.01439	-0.0186382	0.257414
573	347916	0	0.401366	396.463	-0.362481	2.0835							573	844141	0	1.00463	-2.01405	-0.0159259	0.267535
574	347947	0	0.401402	396.46	-0.340856	2.09895							574	844093	0	1.00457	-2.01378	-0.0131126	0.275713
575	347883	0	0.401328	396.457	-0.31924	2.10361							575	844174	0	1.00467	-2.01364	-0.0102115	0.282013
576	347907	0	0.401356	396.454	-0.297718	2.09933							576	844130	0	1.00462	-2.01343	-0.00724159	0.286627
577	347890	0	0.401336	396.452	-0.276391	2.08759							577	844117	0	1.0046	-2.01334	-0.00422568	0.289576
578	347907	0	0.401356	396.449	-0.255324	2.06954							578	844171	0	1.00467	-2.01339	-0.00118432	0.290958
579	347913	0	0.401362	396.447	-0.234556	2.04629							579	844171	0	1.00467	-2.01347	0.00184786	0.290905
580	347910	0	0.401359	396.445	-0.214119	2.01855							580	844176	0	1.00467	-2.01362	0.00484498	0.289514
581	347950	0	0.401405	396.443	-0.194006	1.98694							581	844142	0	1.00463	-2.01384	0.00779045	0.286864
582	347947	0	0.401402	396.441	-0.174215	1.95175							582	844160	0	1.00465	-2.0141	0.0106817	0.283049
583	347943	0	0.401397	396.439	-0.154756	1.91349							583	844143	0	1.00463	-2.01433	0.0135113	0.278209
584	347954	0	0.40141	396.438	-0.135651	1.87244							584	844217	0	1.00472	-2.01468	0.0162768	0.272428
585	347883	0	0.401328	396.437	-0.116926	1.82867							585	844188	0	1.00469	-2.01491	0.0189827	0.26597
586	347947	0	0.401402	396.435	-0.0986305	1.78199							586	844156	0	1.00465	-2.01504	0.0216291	0.258871
587	347972	0	0.401431	396.434	-0.0808076	1.73169							587	844157	0	1.00465	-2.0151	0.0242121	0.25107
588	347972	0	0.401431	396.434	-0.0635089	1.67717							588	844134	0	1.00462	-2.01515	0.0267243	0.242329
589	347951	0	0.401406	396.433	-0.0467726	1.61788							589	844189	0	1.00469	-2.01526	0.0291594	0.232515
590	348006	0	0.40147	396.433	-0.0306306	1.55334							590	844098	0	1.00458	-2.01537	0.0315071	0.221564
591	347933	0	0.401386	396.433	-0.0151153	1.48309							591	844122	0	1.00461	-2.01562	0.0337642	0.209335
592	347951	0	0.401406	396.434	-0.00028021	1.40706							592	844130	0	1.00462	-2.01602	0.0359095	0.195749
593	347919	0	0.401369	396.434	0.0137968	1.32491							593	844125	0	1.00461	-2.01659	0.0379188	0.180752
594	347902	0	0.40135	396.435	0.027045	1.2363							594	844176	0	1.00467	-2.01718	0.0397612	0.16449
595	347973	0	0.401432	396.435	0.0393894	1.14077							595	844153	0	1.00465	-2.01776	0.0414131	0.14704
596	347964	0	0.401421	396.435	0.0507501	1.03761							596	844108	0	1.00459	-2.01833	0.0428645	0.128433
597	347959	0	0.401415	396.436	0.0610453	0.926153							597	844163	0	1.00466	-2.01909	0.044103	0.108582
598	347926	0	0.401377	396.437	0.0702163	0.806234							598	844200	0	1.0047	-2.01979	0.0451189	0.0876518
599	347898	0	0.401345	396.438	0.0781815	0.678221							599	844224	0	1.00473	-2.02048	0.0459024	0.0658157
600	347919	0	0.401369	396.44	0.0848475	0.542656							600	844245	0	1.00476	-2.02101	0.0464631	0.0432893
601	347913	0	0.401362	396.441	0.0901199	0.40047							601	844185	0	1.00468	-2.02135	0.0468042	0.0201967
602	347880	0	0.401324	396.443	0.093883	0.252824							602	844103	0	1.00459	-2.02171	0.046919	-0.00343632
603	347950	0	0.401405	396.445	0.096023	0.1011							603	844104	0	1.00459	-2.02217	0.046794	-0.0274915
604	347972	0	0.401431	396.447	0.0964679	-0.0533632							604	844247	0	1.00476	-2.02283	0.0464277	-0.0518611
605	347914	0	0.401364	396.449	0.0951833	-0.208995							605	844200	0	1.0047	-2.0233	0.0458167	-0.0763517
606	347927	0	0.401379	396.451	0.0921637	-0.364023							606	844147	0	1.00464	-2.02383	0.0449559	-0.100958
607	347946	0	0.401401	396.454	0.0874458	-0.516292							607	844125	0	1.00461	-2.02446	0.0438367	-0.125514
608	347890	0	0.401336	396.456	0.081089	-0.663307							608	844165	0	1.00466	-2.02519	0.0424522	-0.149717
609	347912	0	0.401361	396.458	0.0731773	-0.802503							609	844208	0	1.00471	-2.02588	0.040804	-0.173072
610	347910	0	0.401359	396.459	0.0638128	-0.931452							610	844187	0	1.00469	-2.0265	0.0388956	-0.195266
611	347918	0	0.401368	396.46	0.0531021	-1.04796							611	844143	0	1.00463	-2.02715	0.0367402	-0.216075
612	347921	0	0.401372	396.461	0.0411646	-1.15003							612	844237	0	1.00475	-2.02774	0.0343482	-0.235176
613	347932	0	0.401384	396.462	0.0281649	-1.23588							613	844200	0	1.0047	-2.02811	0.0317425	-0.252215
614	347912	0	0.401361	396.462	0.0142862	-1.30375							614	844123	0	1.00461	-2.02838	0.028953	-0.266886
615	347951	0	0.401406	396.463	-0.00027736	-1.35191							615	844204	0	1.00471	-2.02872	0.0260253	-0.279036
616	347972	0	0.401431	396.463	-0.0153063	-1.37869							616	844198	0	1.0047	-2.02905	0.0229958	-0.288428
617	347884	0	0.401329	396.464	-0.0305715	-1.38233							617	844202	0	1.0047	-2.02925	0.0198878	-0.294817
618	347897	0	0.401344	396.464	-0.0458397	-1.36103							618	844153	0	1.00465	-2.02937	0.0167347	-0.297962
619	347909	0	0.401358	396.464	-0.0608602	-1.31366							619	844268	0	1.00478	-2.02951	0.0135709	-0.297795
620	347845	0	0.401284	396.464	-0.075361	-1.23949							620	844144	0	1.00464	-2.02947	0.0104259	-0.294282
621	347843	0	0.401282	396.463	-0.0890519	-1.13815							621	844151	0	1.00464	-2.02955	0.00731965	-0.287576
622	347892	0	0.401338	396.462	-0.10163	-1.00985							622	844215	0	1.00472	-2.02976	0.00428422	-0.277694
623	347802	0	0.401234	396.46	-0.112778	-0.85521							623	844153	0	1.00465	-2.02987	0.00136216	-0.264532
624	347856	0	0.401297	396.458	-0.122159	-0.675197							624	844210	0	1.00471	-2.0299	-0.00140717	-0.248154
625	347924	0	0.401375	396.455	-0.129474	-0.471431							625	844197	0	1.0047	-2.02981	-0.00399284	-0.228671
626	347892	0	0.401338	396.452	-0.134453	-0.245883							626	844231	0	1.00474	-2.02973	-0.00636093	-0.206207
627	347945	0	0.401399	396.448	-0.136855	-0.00092526							627	844195	0	1.0047	-2.02954	-0.00848373	-0.180866
628	347967	0	0.401425	396.445	-0.136488	0.260327							628	844173	0	1.00467	-2.0292	-0.0103275	-0.152908
629	347909	0	0.401358	396.442	-0.133197	0.534463							629	844146	0	1.00464	-2.02881	-0.011856	-0.122784
630	347976	0	0.401435	396.438	-0.126863	0.817564							630	844221	0	1.00473	-2.02847	-0.0130438	-0.091052
631	347993	0	0.401455	396.435	-0.117432	1.10548							631	844205	0	1.00471	-2.02807	-0.0138696	-0.0581604
632	347966	0	0.401424	396.432	-0.104867	1.39411							632	844137	0	1.00463	-2.02761	-0.014319	-0.0245659
633	347969	0	0.401427	396.429	-0.0891629	1.6793							633	844165	0	1.00466	-2.02718	-0.0143842	0.009196
634	347993	0	0.401455	396.427	-0.0703909	1.9569							634	844186	0	1.00469	-2.02683	-0.0140648	0.0425099
635	347940	0	0.401394	396.425	-0.0486422	2.22286							635	844184	0	1.00468	-2.02651	-0.0133719	0.074763
636	347913	0	0.401362	396.423	-0.0240517	2.47304							636	844215	0	1.00472	-2.02615	-0.0123334	0.105415
637	347937	0	0.40139	396.421	0.00318344	2.70361							637	844140	0	1.00463	-2.02574	-0.0109721	0.133847
638	348009	0	0.401473	396.419	0.03284	2.91068							638	844224	0	1.00473	-2.02546	-0.00930883	0.159405
639	347885	0	0.40133	396.418	0.0646606	3.0903							639	844163	0	1.00466	-2.02513	-0.00738021	0.18154
640	347950	0	0.401405	396.417	0.09834	3.2393							640	844176	0	1.00467	-2.02482	-0.00522636	0.199753
641	347979	0	0.401439	396.417	0.133546	3.35488							641	844166	0	1.00466	-2.02469	-0.00288448	0.213613
642	347933	0	0.401386	396.418	0.169902	3.43464							642	844179	0	1.00468	-2.02454	-0.00039393	0.222909
643	347975	0	0.401434	396.419	0.207001	3.47695							643	844150	0	1.00464	-2.02436	0.00219205	0.227339
644	348005	0	0.401469	396.421	0.244415	3.48057							644	844134	0	1.00462	-2.02433	0.00480953	0.226548
645	347928	0	0.40138	396.424	0.281673	3.44483							645	844217	0	1.00472	-2.02438	0.00740061	0.220424
646	348011	0	0.401475	396.427	0.318325	3.36992							646	844158	0	1.00465	-2.02443	0.00990551	0.208932
647	347966	0	0.401424	396.432	0.353943	3.25637							647	844159	0	1.00465	-2.02457	0.0122616	0.192051
648	347930	0	0.401382	396.436	0.388105	3.10543							648	844119	0	1.00461	-2.02488	0.0144157	0.169865
649	348017	0	0.401482	396.442	0.420418	2.91927							649	844180	0	1.00468	-2.02535	0.0163086	0.142622
650	347988	0	0.401449	396.448	0.450508	2.70049							650	844171	0	1.00467	-2.02581	0.017877	0.110747
651	347926	0	0.401377	396.454	0.47804	2.45271							651	844182	0	1.00468	-2.02626	0.0190706	0.074724
652	347966	0	0.401424	396.461	0.50273	2.1799							652	844166	0	1.00466	-2.02675	0.0198454	0.035061
653	347916	0	0.401366	396.468	0.524311	1.88621							653	844158	0	1.00465	-2.02728	0.0201616	-0.00767811
654	347950	0	0.401405	396.475	0.542554	1.57632							654	844169	0	1.00467	-2.02784	0.0199898	-0.0528587
655	347932	0	0.401384	396.483	0.557313	1.25512							655	844194	0	1.0047	-2.02842	0.0193067	-0.0997645
656	347864	0	0.401306	396.492	0.568474	0.927755							656	844206	0	1.00471	-2.02898	0.0180992	-0.147582
657	347882	0	0.401327	396.5	0.575998	0.599702							657	844186	0	1.00469	-2.02949	0.0163675	-0.195569
658	347885	0	0.40133	396.508	0.579913	0.276416							658	844196	0	1.0047	-2.02999	0.0141128	-0.242942
659	347817	0	0.401252	396.517	0.580289	-0.0364656							659	844202	0	1.0047	-2.03041	0.0113403	-0.288938
660	347790	0	0.401221	396.525	0.577264	-0.333173							660	844189	0	1.00469	-2.03088	0.00807267	-0.332854
661	347827	0	0.401263	396.533	0.571032	-0.608775							661	844238	0	1.00475	-2.03131	0.00433686	-0.373939
662	347825	0	0.401261	396.541	0.561839	-0.858772							662	844170	0	1.00467	-2.03158	0.00016715	-0.411479
663	347794	0	0.401225	396.548	0.550004	-1.07925							663	844182	0	1.00468	-2.03182	-0.00439769	-0.444914
664	347800	0	0.401232	396.555	0.5359	-1.26683							664	844214	0	1.00472	-2.03204	-0.00930767	-0.473612
665	347859	0	0.4013	396.561	0.519935	-1.4185							665	844186	0	1.00469	-2.03204	-0.014511	-0.496936
666	347851	0	0.401291	396.567	0.502573	-1.53204							666	844217	0	1.00472	-2.03201	-0.0199526	-0.514506
667	347786	0	0.401216	396.572	0.48426	-1.60587							667	844206	0	1.00471	-2.03186	-0.025566	-0.525981
668	347800	0	0.401232	396.577	0.465422	-1.63879							668	844226	0	1.00473	-2.03161	-0.0312783	-0.531169
669	347830	0	0.401267	396.581	0.446488	-1.63061							669	844178	0	1.00468	-2.03118	-0.0370222	-0.529952
670	347806	0	0.401239	396.585	0.427894	-1.58203							670	844185	0	1.00468	-2.03072	-0.0427206	-0.522338
671	347840	0	0.401278	396.588	0.41007	-1.49438							671	844187	0	1.00469	-2.03014	-0.0482921	-0.508343
672	347829	0	0.401266	396.591	0.393418	-1.37011							672	844171	0	1.00467	-2.02948	-0.0536681	-0.48811
673	347784	0	0.401214	396.595	0.378327	-1.21182							673	844168	0	1.00466	-2.02872	-0.0587809	-0.461922
674	347737	0	0.401159	396.597	0.365184	-1.02239							674	844202	0	1.0047	-2.02792	-0.0635731	-0.430146
675	347775	0	0.401203	396.599	0.354331	-0.80534							675	844194	0	1.0047	-2.02697	-0.0679919	-0.39322
676	347780	0	0.401209	396.601	0.346057	-0.564809							676	844177	0	1.00467	-2.02592	-0.0719882	-0.351696
677	347766	0	0.401193	396.602	0.340609	-0.305482							677	844186	0	1.00469	-2.02487	-0.0755121	-0.306243
678	347759	0	0.401185	396.603	0.33816	-0.0325133							678	844155	0	1.00465	-2.0238	-0.0785259	-0.257447
679	347741	0	0.401164	396.604	0.338842	0.248429							679	844178	0	1.00468	-2.02278	-0.0809966	-0.205944
680	347797	0	0.401229	396.604	0.342735	0.531255							680	844231	0	1.00474	-2.02173	-0.0828958	-0.152207
681	347812	0	0.401246	396.605	0.349847	0.809723							681	844171	0	1.00467	-2.02053	-0.0842086	-0.0967849
682	347840	0	0.401278	396.606	0.360117	1.07806							682	844165	0	1.00466	-2.01927	-0.0849241	-0.0403191
683	347824	0	0.40126	396.607	0.373412	1.33089							683	844151	0	1.00464	-2.01806	-0.0850412	0.0164374
684	347824	0	0.40126	396.609	0.389517	1.56345							684	844164	0	1.00466	-2.01685	-0.0845618	0.0728197
685	347832	0	0.401269	396.611	0.408139	1.77107							685	844096	0	1.00458	-2.01561	-0.0834942	0.128067
686	347831	0	0.401268	396.614	0.428934	1.94947							686	844205	0	1.00471	-2.01453	-0.081838	0.181436
687	347852	0	0.401292	396.617	0.451498	2.09513							687	844118	0	1.0046	-2.01332	-0.0796061	0.232347
688	347869	0	0.401312	396.621	0.475424	2.20505							688	844165	0	1.00466	-2.01224	-0.0768265	0.280193
689	347841	0	0.401279	396.626	0.500316	2.27684							689	844144	0	1.00464	-2.01115	-0.0735396	0.324567
690	347790	0	0.401221	396.631	0.525774	2.30906							690	844207	0	1.00471	-2.01019	-0.0697875	0.36508
691	347786	0	0.401216	396.637	0.55137	2.30119							691	844095	0	1.00458	-2.00911	-0.0656286	0.401436
692	347728	0	0.401149	396.644	0.576671	2.25331							692	844124	0	1.00461	-2.00824	-0.0611234	0.433193
693	347755	0	0.40118	396.65	0.601263	2.16652							693	844083	0	1.00456	-2.0075	-0.056327	0.460131
694	347764	0	0.401191	396.657	0.624723	2.04204							694	844129	0	1.00462	-2.00694	-0.051301	0.482186
695	347791	0	0.401222	396.664	0.646632	1.88136							695	844115	0	1.0046	-2.00648	-0.0460932	0.499435
696	347753	0	0.401178	396.671	0.666604	1.68642							696	844144	0	1.00464	-2.00626	-0.0407522	0.512024
697	347742	0	0.401165	396.68	0.684281	1.45994							697	844152	0	1.00465	-2.00603	-0.0353219	0.520286
698	347778	0	0.401207	396.688	0.699331	1.20536							698	844147	0	1.00464	-2.00588	-0.0298548	0.52456
699	347761	0	0.401187	396.697	0.71148	0.926434							699	844178	0	1.00468	-2.00572	-0.0243903	0.525175
700	347702	0	0.401119	396.707	0.720468	0.627608							700	844121	0	1.00461	-2.00549	-0.0189641	0.522515
701	347743	0	0.401166	396.716	0.726079	0.31383							701	844138	0	1.00463	-2.00533	-0.0136074	0.516738
702	347690	0	0.401105	396.727	0.728144	-0.00977521							702	844103	0	1.00459	-2.00524	-0.00834459	0.508105
703	347680	0	0.401094	396.737	0.726563	-0.338047							703	844132	0	1.00462	-2.00525	-0.00319429	0.496885
704	347683	0	0.401097	396.747	0.721315	-0.665934							704	844135	0	1.00462	-2.0053	0.00182375	0.483496
705	347640	0	0.401047	396.756	0.712435	-0.988832							705	844117	0	1.0046	-2.00543	0.006694	0.468262
706	347645	0	0.401053	396.766	0.700036	-1.30202							706	844114	0	1.0046	-2.00567	0.0114009	0.45162
707	347691	0	0.401106	396.775	0.684292	-1.60098							707	844115	0	1.0046	-2.00596	0.0159155	0.433931
708	347654	0	0.401064	396.783	0.665431	-1.88156							708	844128	0	1.00462	-2.00641	0.0202204	0.415525
709	347632	0	0.401038	396.791	0.643716	-2.14019							709	844125	0	1.00461	-2.00689	0.0243043	0.396755
710	347592	0	0.400992	396.799	0.619419	-2.37394							710	844159	0	1.00465	-2.0074	0.0281647	0.377898
711	347637	0	0.401044	396.806	0.59282	-2.5806							711	844142	0	1.00463	-2.00793	0.0318011	0.359157
712	347587	0	0.400986	396.812	0.564226	-2.75871							712	844187	0	1.00469	-2.00857	0.0352303	0.34066
713	347628	0	0.401034	396.818	0.533962	-2.90738							713	844167	0	1.00466	-2.00909	0.0384643	0.322664
714	347616	0	0.40102	396.824	0.502356	-3.02656							714	844150	0	1.00464	-2.00958	0.0415184	0.305204
715	347593	0	0.400993	396.829	0.469741	-3.1165							715	844177	0	1.00467	-2.01002	0.0444163	0.288255
716	347573	0	0.40097	396.834	0.436442	-3.17779							716	844231	0	1.00474	-2.01042	0.0471715	0.271638
717	347527	0	0.400917	396.838	0.402762	-3.21111							717	844094	0	1.00458	-2.01061	0.0497928	0.255129
718	347627	0	0.401033	396.841	0.368991	-3.21783							718	844186	0	1.00469	-2.01096	0.0522801	0.238284
719	347634	0	0.401041	396.844	0.335407	-3.20002							719	844103	0	1.00459	-2.01124	0.0546351	0.220831
720	347596	0	0.400997	396.847	0.302245	-3.16002							720	844140	0	1.00463	-2.01158	0.0568448	0.20242
721	347548	0	0.400941	396.849	0.269736	-3.1006							721	844124	0	1.00461	-2.01209	0.0588949	0.182648
722	347538	0	0.40093	396.85	0.238085	-3.0249							722	844106	0	1.00459	-2.01267	0.0607613	0.161299
723	347596	0	0.400997	396.851	0.207487	-2.93603							723	844122	0	1.00461	-2.01341	0.0624166	0.138175
724	347608	0	0.401011	396.851	0.178086	-2.83726							724	844135	0	1.00462	-2.01424	0.0638244	0.113205
725	347614	0	0.401018	396.852	0.149959	-2.73198							725	844177	0	1.00467	-2.01515	0.064964	0.0863197
726	347621	0	0.401026	396.852	0.123153	-2.62312							726	844179	0	1.00468	-2.01602	0.0658087	0.0576201
727	347562	0	0.400958	396.852	0.0976683	-2.51363							727	844162	0	1.00466	-2.01693	0.0663341	0.0271492
728	347647	0	0.401056	396.851	0.0734539	-2.4063							728	844171	0	1.00467	-2.0178	0.0665274	-0.00481096
729	347624	0	0.401029	396.851	0.0504387	-2.30406							729	844158	0	1.00465	-2.01862	0.0663738	-0.0379599
730	347606	0	0.401008	396.85	0.0285193	-2.20921							730	844113	0	1.0046	-2.01936	0.0658646	-0.0719959
731	347606	0	0.401008	396.85	0.00756851	-2.12336							731	844191	0	1.00469	-2.02017	0.0649935	-0.106725
732	347633	0	0.401039	396.849	-0.0125298	-2.04752							732	844170	0	1.00467	-2.02096	0.0637593	-0.14181
733	347590	0	0.40099	396.849	-0.0318994	-1.98206							733	844177	0	1.00467	-2.02174	0.0621528	-0.176843
734	347594	0	0.400994	396.849	-0.0506712	-1.92684							734	844185	0	1.00468	-2.02257	0.0601839	-0.211438
735	347598	0	0.400999	396.849	-0.0689995	-1.88122							735	844177	0	1.00467	-2.02342	0.0578615	-0.245047
736	347583	0	0.400982	396.848	-0.0870185	-1.84417							736	844193	0	1.00469	-2.02428	0.0551849	-0.277149
737	347604	0	0.401006	396.847	-0.104844	-1.81429							737	844162	0	1.00466	-2.02512	0.052157	-0.307076
738	347616	0	0.40102	396.847	-0.122549	-1.79031							738	844179	0	1.00468	-2.02603	0.0487915	-0.334145
739	347635	0	0.401042	396.846	-0.140179	-1.77065							739	844162	0	1.00466	-2.02676	0.0451129	-0.35756
740	347623	0	0.401028	396.845	-0.157767	-1.75331							740	844111	0	1.0046	-2.02749	0.0411548	-0.376896
741	347614	0	0.401018	396.844	-0.175308	-1.73593							741	844241	0	1.00475	-2.0283	0.0369682	-0.391707
742	347561	0	0.400956	396.843	-0.192782	-1.71619							742	844197	0	1.0047	-2.02894	0.0326068	-0.401444
743	347600	0	0.401001	396.842	-0.210146	-1.69177							743	844210	0	1.00471	-2.02946	0.0281444	-0.405638
744	347651	0	0.40106	396.84	-0.227367	-1.66097							744	844213	0	1.00472	-2.02978	0.0236618	-0.403903
745	347553	0	0.400947	396.838	-0.244378	-1.6223							745	844211	0	1.00472	-2.02995	0.0192456	-0.396046
746	347632	0	0.401038	396.836	-0.261068	-1.57433							746	844184	0	1.00468	-2.02996	0.0149565	-0.382024
747	347613	0	0.401016	396.833	-0.277311	-1.5162							747	844268	0	1.00478	-2.02994	0.0108566	-0.362032
748	347666	0	0.401077	396.83	-0.292961	-1.44738							748	844182	0	1.00468	-2.02963	0.00701154	-0.336318
749	347598	0	0.400999	396.827	-0.307856	-1.36766							749	844184	0	1.00468	-2.02922	0.00348053	-0.305546
750	347592	0	0.400992	396.824	-0.321864	-1.27672							750	844119	0	1.00461	-2.02878	0.00032309	-0.270509
751	347603	0	0.401005	396.82	-0.334855	-1.17484							751	844166	0	1.00466	-2.0285	-0.00241258	-0.231986
752	347561	0	0.400956	396.816	-0.346687	-1.06302							752	844199	0	1.0047	-2.02822	-0.00468806	-0.190501
753	347567	0	0.400963	396.811	-0.357252	-0.942984							753	844192	0	1.00469	-2.02794	-0.00647572	-0.146677
754	347621	0	0.401026	396.806	-0.366467	-0.816968							754	844211	0	1.00472	-2.02761	-0.00775141	-0.101202
755	347619	0	0.401023	396.801	-0.374265	-0.687527							755	844217	0	1.00472	-2.02715	-0.00852118	-0.0548215
756	347596	0	0.400997	396.796	-0.380574	-0.557205							756	844210	0	1.00471	-2.02664	-0.00879924	-0.00848897
757	347632	0	0.401038	396.79	-0.385358	-0.429081							757	844198	0	1.0047	-2.0261	-0.00859271	0.0370547
758	347672	0	0.401084	396.785	-0.388631	-0.30611							758	844154	0	1.00465	-2.02555	-0.00790369	0.0808619
759	347668	0	0.40108	396.78	-0.390469	-0.191113							759	844102	0	1.00459	-2.02507	-0.0067446	0.121994
760	347657	0	0.401067	396.774	-0.390997	-0.0869039							760	844145	0	1.00464	-2.02482	-0.00513271	0.159585
761	347693	0	0.401109	396.769	-0.39036	0.00365714							761	844186	0	1.00469	-2.02461	-0.00309805	0.193172
762	347694	0	0.40111	396.764	-0.388729	0.0775536							762	844200	0	1.0047	-2.02423	-0.00069559	0.222408
763	347771	0	0.401199	396.759	-0.386345	0.132056							763	844156	0	1.00465	-2.02389	0.00203398	0.246872
764	347716	0	0.401135	396.754	-0.38342	0.16477							764	844155	0	1.00465	-2.02365	0.00501536	0.266002
765	347693	0	0.401109	396.75	-0.380185	0.174192							765	844169	0	1.00467	-2.02354	0.00816355	0.279464
766	347713	0	0.401132	396.747	-0.376895	0.159362							766	844146	0	1.00464	-2.02356	0.0113987	0.287322
767	347752	0	0.401177	396.743	-0.373827	0.11596							767	844177	0	1.00467	-2.02376	0.0146594	0.291316
768	347702	0	0.401119	396.74	-0.371267	0.0502558							768	844100	0	1.00458	-2.02399	0.0178897	0.289851
769	347741	0	0.401164	396.737	-0.369511	-0.0383008							769	844117	0	1.0046	-2.02456	0.0210319	0.282999
770	347732	0	0.401154	396.735	-0.368858	-0.150241							770	844167	0	1.00466	-2.02533	0.0240166	0.271384
771	347723	0	0.401143	396.732	-0.369566	-0.285325							771	844228	0	1.00474	-2.02608	0.0267911	0.255759
772	347699	0	0.401116	396.73	-0.371874	-0.442997							772	844212	0	1.00472	-2.02664	0.0293459	0.236977
773	347688	0	0.401103	396.728	-0.376444	-0.621436							773	844209	0	1.00471	-2.02717	0.0318599	0.215642
774	347674	0	0.401087	396.726	-0.382698	-0.820002							774	844164	0	1.00466	-2.02762	0.0340866	0.193016
775	347659	0	0.401069	396.724	-0.390941	-1.03871							775	844140	0	1.00463	-2.02819	0.0359938	0.171171
776	347664	0	0.401075	396.721	-0.401449	-1.28162							776	844208	0	1.00471	-2.02889	0.0375815	0.155252
777	347661	0	0.401072	396.719	-0.414424	-1.58594							777	844214	0	1.00472	-2.02957	0.0388547	0.166815
778	347705	0	0.401122	396.716	-0.430055	-1.76852							778	844200	0	1.0047	-2.03017	0.039836	0.150234
779	347703	0	0.40112	396.713	-0.448399	-1.96892							779	844200	0	1.0047	-2.0308	0.0405365	0.131545
780	347711	0	0.401129	396.71	-0.469668	-2.19245							780	844222	0	1.00473	-2.03133	0.0410516	0.11455
781	347713	0	0.401132	396.707	-0.494157	-2.43622							781	844161	0	1.00466	-2.03188	0.0415725	0.101792
782	347716	0	0.401135	396.703	-0.522653	-2.69737							782	844121	0	1.00461	-2.03242	0.0426469	0.0965332
783	347692	0	0.401107	396.699	-0.559878	-2.96577							783	844194	0	1.0047	-2.03294	0.0468089	0.0936173
784	347684	0	0.401098	396.694	-0.584096	-3.27267							784	844190	0	1.00469	-2.03337	0.0473739	0.105996
785	347729	0	0.40115	396.689	-0.612714	-3.63151							785	844223	0	1.00473	-2.0336	0.0476454	0.149503
786	347728	0	0.401149	396.683	-0.645792	-4.118							786	844232	0	1.00474	-2.03395	0.0478325	0.271236
787	347747	0	0.401171	396.678	-0.683287	-5.13344							787	844232	0	1.00474	-2.03426	0.0482088	0.689714
788	347697	0	0.401113	396.671	-0.725133								788	844205	0	1.00471	-2.03419	0.0491654
789	347702	0	0.401119	396.663	-0.770316								789	844214	0	1.00472	-2.03506	0.0500888
790	347786	0	0.401216	396.656	-0.822775								790	844224	0	1.00473	-2.03506	0.0525555
791	347766	0	0.401193	396.649	-0.88418								791	844136	0	1.00463	-2.03507	0.0584768
792	347745	0	0.401169	396.641	-0.963828								792	844180	0	1.00468	-2.0352	0.0735999
793	347804	0	0.401237	396.632	-1.11017								793	844222	0	1.00473	-2.03512	0.124338
794	347791	0	0.401222	396.624									794	844160	0	1.00465	-2.0352
795	347835	0	0.401272	396.614									795	844228	0	1.00474	-2.03543
796	347740	0	0.401163	396.603									796	844193	0	1.00469	-2.03495
797	347768	0	0.401195	396.592									797	844169	0	1.00467	-2.03529
798	347816	0	0.401251	396.579									798	844159	0	1.00465	-2.03753
799	347848	0	0.401287	396.544									799	844223	0	1.00473	-2.04918
#End													#End
JOB DATA													JOB DATA
Job UID: <1719486602_2029>	Sample UID: <1719484691_1781>	Test UID: <1719481066_1566>											Job UID: <1723784621_1879>	Sample UID: <1723784588_1872>	Test UID: <1719481036_1563>
Material UID: <0_0>	Quality Control UID: <0_0>												Material UID: <0_0>	Quality Control UID: <0_0>
#SampleID: Sample 2 #Test: TCT+aPV	#Type	Test Release: 7.6											#SampleID: aPI #Test: TCT+aPI	#Type	Test Release: 7.6
Wavelength: 671nm-Red	EndOfDelay - Time:	5	Acquisition Time: 80.00000000	#AquisitionMode	Standard								Wavelength: 671nm-Red	EndOfDelay - Time:	5	Acquisition Time: 80.00000000	#AquisitionMode	Standard
#Type: Patient													#Type: Patient
Lot Type: Unknown lot	Lot Status: Active Lot												Lot Type: Unknown lot	Lot Status: Active Lot
Calibration UID: <0_0> Finish Date													Calibration UID: <0_0> Finish Date
Master Calibration UID: <0_0> Finish Date													Master Calibration UID: <0_0> Finish Date
Paired Master UID: <0_0> Finish Date													Paired Master UID: <0_0> Finish Date
Rerun Master UID: <0_0> Finish Date													Rerun Master UID: <0_0> Finish Date
NormalPoolPlasma UID: <0_0> Finish Date													NormalPoolPlasma UID: <0_0> Finish Date
Tracking materials: 1													Tracking materials: 1
Material: Venom aPV	Mat Def UID: <1719480934_1557>	Vial: <1719486559_1992>											Material: Venom aPI	Mat Def UID: <1719480916_1555>	Vial: <1723784714_1911>
	Type: Reagent	Lot ID:	Expiration Date:											Type: Reagent	Lot ID:	Expiration Date:
User Revision:	Order Date: 27/06/2024 12:10:02	Finish Date:											User Revision:	Order Date: 16/08/2024 06:03:41	Finish Date:
Priority: Normal	Job Status: Complete	Persistent Job Status: Complete											Priority: Normal	Job Status: Complete	Persistent Job Status: Complete
Track: 06	Is CTS: 0	Is TFH: 0	Slot: 7	AM: 1	Rack Area: Sample	Position: 1							Track: 60	Is CTS: 0	Is TFH: 0	Slot: 7	AM: 1	Rack Area: Sample	Position: 0
Highest Error: CE Coagulation error on one or more determinations													Highest Error: CE Coagulation error on one or more determinations
Added by: user													Added by: user
Display Clot Curves as Primary Wavelength: Normalized	Y Axis Setup	[0.000 - 3000.000]	AutoScale	Enabled									Display Clot Curves as Primary Wavelength: Normalized	Y Axis Setup	[0.000 - 3000.000]	AutoScale	Enabled
	Smooth with degree: 10	10	14											Smooth with degree: 10	10	14
Normalization is: Normalize using absorbance													Normalization is: Normalize using absorbance
Completed Date: 27/06/2024 12:15:47	Calculated Date: 27/06/2024 12:15:47												Completed Date: 16/08/2024 06:11:50	Calculated Date: 16/08/2024 06:11:50
Validated Date:	Verifier:												Validated Date:	Verifier:
Result Status	FAILED	Validation Status: Failed											Result Status	FAILED	Validation Status: Failed
Upload Status: Not uploaded	Print Status: Not printed												Upload Status: Not uploaded	Print Status: Not printed
Precision: 3													Precision: 3
Test Range: [-999999.999 - 999999.999]													Test Range: [-999999.999 - 999999.999]
NPP Mode:	User input valueNormal Pool Value: Result: 0.00000000	s											NPP Mode:	User input valueNormal Pool Value: Result: 0.00000000	s
	Normal Range: Disabled													Normal Range: Disabled
	Test Range: [5.000 - 80.000]													Test Range: [5.000 - 80.000]
Calibration:	Result Status	Undefined											Calibration:	Result Status	Undefined
Calibrated Delta Check: 0.00000000													Calibrated Delta Check: 0.00000000
Overall Calibration (all segments) Result Status	FAILED Segment Cut Off: 0.00000000												Overall Calibration (all segments) Result Status	FAILED Segment Cut Off: 0.00000000
Calibration curve results computed with following axis configuration													Calibration curve results computed with following axis configuration
	Calibration Results along X axis, Measured Results along Y axis													Calibration Results along X axis, Measured Results along Y axis
Overall Calibration (all segments)													Overall Calibration (all segments)
*** Calibration Results used in Parallelism ***													*** Calibration Results used in Parallelism ***
	with x transformation:	X=X												with x transformation:	X=X
	with Y transformation:	Y=Y												with Y transformation:	Y=Y
Result Status	Undefined												Result Status	Undefined
this model failed estimation due to Indetermination error													this model failed estimation due to Indetermination error
HIL Results													HIL Results
	TestCode:	Completed Date:	Status: Cancelled											TestCode: HIL	Completed Date: 16/08/2024 06:04:40	Status: OK
	Hemoglobin: FAILED													Hemoglobin: [EEDA03F203F003EE03F3 - 551803F303F703EE03F7] mg/dL	IL Threshold: 0.00000000	User Threshold: 0.00000000
	Bilirubin: FAILED													Bilirubin: [C31803F003EE03F0 - C31803F003EE03F0] mg/dL	IL Threshold: 0.00000000	User Threshold: 0.00000000
	Lipemia: FAILED													Lipemia: [931E03F003EE03F9 - 821803F103EE03F1] mAbs	IL Threshold: 0.00000000	User Threshold: 0.00000000
Concentration: 1	Concentration: 100.00000000	Liquid Name		Target: 100.00000000									Concentration: 1	Concentration: 100.00000000	Liquid Name		Target: 100.00000000
Determination: 1	Completed Date: 27/06/2024 12:15:47												Determination: 1	Completed Date: 16/08/2024 06:11:50
Primary Wavelength	Determination Wavelength Results												Primary Wavelength	Determination Wavelength Results
MeasuredResultResult: FAILED	s												MeasuredResultResult: FAILED	s
	Normal Range: [-999999.900 - 999999.900]													Normal Range: [-999999.900 - 999999.900]
	Test Range: [5.000 - 80.000]													Test Range: [5.000 - 80.000]
	Result Errors and Warnings....													Result Errors and Warnings....
		RE	5100	Measured result failed											RE	5100	Measured result failed
Data Reduction Errors and Warnings ...													Data Reduction Errors and Warnings ...
	CE	5050	(Data) First point out of range											CE	5057	(Data) Curve min. and max. not in correct sequence
UpperClotPoint: Has not been established	ClotPoint: Has not been established												UpperClotPoint: Has not been established	ClotPoint: Has not been established
Result: FAILED	s												Result: FAILED	s
	Normal Range: [-999999.900 - 999999.900]													Normal Range: [-999999.900 - 999999.900]
	Test Range: [5.000 - 80.000]													Test Range: [5.000 - 80.000]
	Result Errors and Warnings....													Result Errors and Warnings....
		RE	5100	Measured result failed											RE	5100	Measured result failed
Result: FAILED	Ratio												Result: FAILED	Ratio
	Normal Range: Disabled													Normal Range: Disabled
	Test Range: Disabled													Test Range: Disabled
	Result Errors and Warnings....													Result Errors and Warnings....
		RE	5100	Measured result failed											RE	5100	Measured result failed
First deriv peak max: Has not been established	Second deriv peak max: Has not been established	Second deriv peak min: Has not been established											First deriv peak max: Has not been established	Second deriv peak max: Has not been established	Second deriv peak min: Has not been established
Primary Wavelength	Concentration Wavelength Results												Primary Wavelength	Concentration Wavelength Results
MeasuredResult	%CV:	Failed											MeasuredResult	%CV:	Failed
Result: FAILED	s												Result: FAILED	s
	Normal Range: [-999999.900 - 999999.900]													Normal Range: [-999999.900 - 999999.900]
	Test Range: [5.000 - 80.000]													Test Range: [5.000 - 80.000]
	Result Errors and Warnings....													Result Errors and Warnings....
		RE	5100	Measured result failed											RE	5100	Measured result failed
Result: FAILED	s												Result: FAILED	s
	Normal Range: [-999999.900 - 999999.900]													Normal Range: [-999999.900 - 999999.900]
	Test Range: [5.000 - 80.000]													Test Range: [5.000 - 80.000]
	Result Errors and Warnings....													Result Errors and Warnings....
		RE	5100	Measured result failed											RE	5100	Measured result failed
Result: FAILED	Ratio												Result: FAILED	Ratio
	Normal Range: Disabled													Normal Range: Disabled
	Test Range: Disabled													Test Range: Disabled
	Result Errors and Warnings....													Result Errors and Warnings....
		RE	5100	Measured result failed											RE	5100	Measured result failed
Calibration Result Result: Undefined													Calibration Result Result: Undefined
	Normal Range: Disabled													Normal Range: Disabled
	Test Range: Disabled													Test Range: Disabled
REPORTABLE RESULTS FOR JOB													REPORTABLE RESULTS FOR JOB
Highest Error: CE Coagulation error on one or more determinations													Highest Error: CE Coagulation error on one or more determinations
Result: FAILED	s												Result: FAILED	s
	Normal Range: [-999999.900 - 999999.900]													Normal Range: [-999999.900 - 999999.900]
	Test Range: [5.000 - 80.000]													Test Range: [5.000 - 80.000]
	Result Errors and Warnings....													Result Errors and Warnings....
		RE	5100	Measured result failed											RE	5100	Measured result failed
Result: FAILED	Ratio												Result: FAILED	Ratio
	Normal Range: Disabled													Normal Range: Disabled
	Test Range: Disabled													Test Range: Disabled
	Result Errors and Warnings....													Result Errors and Warnings....
		RE	5100	Measured result failed											RE	5100	Measured result failed
Errors and Warnings:													Errors and Warnings:
			General													General
	PW	5775	HIL test cancelled											MT	5600	Maintenance overdue or failed
			Replicate 1											PW	5770	Hemoglobin high
			Measured (s)											PW	5772	Lipemia high
	CE	5050	(Data) First point out of range											PW	5771	Bilirubin (Icterus) high
			Unit 1 (s)													Replicate 1
	RE	5100	Measured result failed													Measured (s)
			Unit 2 (Ratio)											CE	5057	(Data) Curve min. and max. not in correct sequence
	RE	5100	Measured result failed													Unit 1 (s)
														RE	5100	Measured result failed
																Unit 2 (Ratio)
														RE	5100	Measured result failed
