# Supplementary material for: Purified zymogens reveal mechanisms of snake venom metalloproteinase auto-activation
Source: eLife. 2026 Jun 10;15:RP109112. doi: 10.7554/eLife.109112 (PMC13252954; doi:10.7554/eLife.109112)
Supplement: Figure 4—source data 3. [file elife-109112-fig4-data3.xlsx]

## Sheet: 4g
[substrate] uM	Reaction rate (uM.min-1)
0	-39.721	-52.455	-46.448
1	-34.085	-61.164	-99.455
2.5	-18.903	-30.745	-57.658
5	152.96	252.76	286.28
7.5	152.89	227.57	308.24
10	177.86	248.7	451.12
20	244.68	352.03	450.33
50	469.99	457.88	545.25
100	658.21	724.13	691.56
175	668.58	632.9	693.29

## Sheet: 4h - PIII
Retention Time (minutes)	Absorbance at 214nm
0.0022	0
0.006333	-0.01131
0.010533	-0.07623
0.014667	-0.24325
0.018867	-0.50312
0.023	-0.78318
0.0272	-1.00855
0.031333	-1.14686
0.035533	-1.20893
0.039667	-1.2283
0.043867	-1.23732
0.048	-1.2506
0.0522	-1.26352
0.056333	-1.26549
0.060533	-1.25497
0.064667	-1.24276
0.068867	-1.24217
0.073	-1.25534
0.0772	-1.27125
0.081333	-1.2789
0.085533	-1.27808
0.089667	-1.2744
0.093867	-1.27043
0.098	-1.26581
0.1022	-1.26014
0.106333	-1.25329
0.110533	-1.24566
0.114667	-1.23909
0.118867	-1.23675
0.123	-1.23903
0.1272	-1.2406
0.131333	-1.2355
0.135533	-1.22309
0.139667	-1.20703
0.143867	-1.19234
0.148	-1.18436
0.1522	-1.18697
0.156333	-1.20003
0.160533	-1.21867
0.164667	-1.23575
0.168867	-1.24616
0.173	-1.24972
0.1772	-1.25074
0.181333	-1.25239
0.185533	-1.25274
0.189667	-1.24936
0.193867	-1.24379
0.198	-1.23916
0.2022	-1.23842
0.206333	-1.24238
0.210533	-1.24733
0.214667	-1.24674
0.218867	-1.2363
0.223	-1.21776
0.2272	-1.19741
0.231333	-1.182
0.235533	-1.17763
0.239667	-1.18722
0.243867	-1.20621
0.248	-1.22491
0.2522	-1.23655
0.256333	-1.23986
0.260533	-1.23499
0.264667	-1.22177
0.268867	-1.20359
0.273	-1.18926
0.2772	-1.18789
0.281333	-1.2009
0.285533	-1.21894
0.289667	-1.2306
0.293867	-1.23369
0.298	-1.232
0.3022	-1.22683
0.306333	-1.21812
0.310533	-1.20768
0.314667	-1.19801
0.318867	-1.19203
0.323	-1.1929
0.3272	-1.19966
0.331333	-1.20638
0.335533	-1.20917
0.339667	-1.20883
0.343867	-1.20705
0.348	-1.20557
0.3522	-1.20665
0.356333	-1.21071
0.360533	-1.21563
0.364667	-1.21817
0.368867	-1.21708
0.373	-1.2146
0.3772	-1.21194
0.381333	-1.20827
0.385533	-1.2052
0.389667	-1.20466
0.393867	-1.20447
0.398	-1.20257
0.4022	-1.20157
0.406333	-1.20288
0.410533	-1.20255
0.414667	-1.1986
0.418867	-1.19474
0.423	-1.1918
0.4272	-1.18615
0.431333	-1.17975
0.435533	-1.18057
0.439667	-1.19125
0.443867	-1.20426
0.448	-1.209
0.4522	-1.20339
0.456333	-1.19649
0.460533	-1.19658
0.464667	-1.20183
0.468867	-1.20539
0.473	-1.20266
0.4772	-1.19282
0.481333	-1.17787
0.485533	-1.16054
0.489667	-1.14342
0.493867	-1.13066
0.498	-1.12685
0.5022	-1.13109
0.506333	-1.13614
0.510533	-1.13724
0.514667	-1.13746
0.518867	-1.14275
0.523	-1.15538
0.5272	-1.17196
0.531333	-1.18447
0.535533	-1.18564
0.539667	-1.17619
0.543867	-1.16403
0.548	-1.1554
0.5522	-1.15111
0.556333	-1.15006
0.560533	-1.15008
0.564667	-1.14912
0.568867	-1.14856
0.573	-1.14975
0.5772	-1.15121
0.581333	-1.15179
0.585533	-1.15158
0.589667	-1.15231
0.593867	-1.15644
0.598	-1.16418
0.6022	-1.17327
0.606333	-1.18142
0.610533	-1.18862
0.614667	-1.19563
0.618867	-1.2009
0.623	-1.20233
0.6272	-1.20007
0.631333	-1.19607
0.635533	-1.19242
0.639667	-1.19112
0.643867	-1.19365
0.648	-1.19945
0.6522	-1.20523
0.656333	-1.20668
0.660533	-1.20049
0.664667	-1.18474
0.668867	-1.15998
0.673	-1.12961
0.6772	-1.09734
0.681333	-1.06488
0.685533	-1.03319
0.689667	-1.00445
0.693867	-0.98102
0.698	-0.96163
0.7022	-0.9397
0.706333	-0.90803
0.710533	-0.86706
0.714667	-0.82598
0.718867	-0.79432
0.723	-0.77503
0.7272	-0.76383
0.731333	-0.75287
0.735533	-0.73654
0.739667	-0.7166
0.743867	-0.70051
0.748	-0.69232
0.7522	-0.6878
0.756333	-0.68031
0.760533	-0.67021
0.764667	-0.66527
0.768867	-0.66876
0.773	-0.67313
0.7772	-0.67117
0.781333	-0.66478
0.785533	-0.65804
0.789667	-0.64978
0.793867	-0.63786
0.798	-0.62664
0.8022	-0.6223
0.806333	-0.62319
0.810533	-0.62223
0.814667	-0.617
0.818867	-0.61181
0.823	-0.60984
0.8272	-0.60787
0.831333	-0.60212
0.835533	-0.59616
0.839667	-0.59781
0.843867	-0.60858
0.848	-0.62007
0.8522	-0.62172
0.856333	-0.60912
0.860533	-0.58443
0.864667	-0.5533
0.868867	-0.52437
0.873	-0.50809
0.8772	-0.50929
0.881333	-0.52076
0.885533	-0.52885
0.889667	-0.52459
0.893867	-0.50844
0.898	-0.48693
0.9022	-0.46629
0.906333	-0.44956
0.910533	-0.43805
0.914667	-0.43267
0.918867	-0.4344
0.923	-0.44539
0.9272	-0.46701
0.931333	-0.49551
0.935533	-0.52311
0.939667	-0.5438
0.943867	-0.55507
0.948	-0.55536
0.9522	-0.54321
0.956333	-0.52042
0.960533	-0.49336
0.964667	-0.46888
0.968867	-0.44959
0.973	-0.4329
0.9772	-0.4144
0.981333	-0.39343
0.985533	-0.3749
0.989667	-0.36602
0.993867	-0.37014
0.998	-0.38282
1.0022	-0.39446
1.00633	-0.39765
1.01053	-0.39284
1.01467	-0.38547
1.01887	-0.37824
1.023	-0.37098
1.0272	-0.3667
1.03133	-0.37551
1.03553	-0.41512
1.03967	-0.50993
1.04387	-0.69101
1.048	-0.99788
1.0522	-1.47981
1.05633	-2.19327
1.06053	-3.19335
1.06467	-4.52268
1.06887	-6.20305
1.073	-8.2326
1.0772	-10.589
1.08133	-13.2377
1.08553	-16.14
1.08967	-19.2588
1.09387	-22.5607
1.098	-26.0168
1.1022	-29.6038
1.10633	-33.306
1.11053	-37.1112
1.11467	-41.0042
1.11887	-44.9675
1.123	-48.9931
1.1272	-53.0931
1.13133	-57.2968
1.13553	-61.6399
1.13967	-66.1568
1.14387	-70.8853
1.148	-75.8722
1.1522	-81.1711
1.15633	-86.828
1.16053	-92.8558
1.16467	-99.2075
1.16887	-105.764
1.173	-112.341
1.1772	-118.72
1.18133	-124.678
1.18553	-130.034
1.18967	-134.668
1.19387	-138.527
1.198	-141.614
1.2022	-143.98
1.20633	-145.711
1.21053	-146.904
1.21467	-147.647
1.21887	-148.017
1.223	-148.077
1.2272	-147.879
1.23133	-147.457
1.23553	-146.835
1.23967	-146.033
1.24387	-145.082
1.248	-144.015
1.2522	-142.872
1.25633	-141.691
1.26053	-140.503
1.26467	-139.326
1.26887	-138.159
1.273	-136.982
1.2772	-135.762
1.28133	-134.459
1.28553	-133.031
1.28967	-131.441
1.29387	-129.669
1.298	-127.708
1.3022	-125.557
1.30633	-123.222
1.31053	-120.715
1.31467	-118.057
1.31887	-115.272
1.323	-112.387
1.3272	-109.421
1.33133	-106.384
1.33553	-103.282
1.33967	-100.121
1.34387	-96.906
1.348	-93.6436
1.3522	-90.342
1.35633	-87.0102
1.36053	-83.6551
1.36467	-80.2791
1.36887	-76.8789
1.373	-73.4497
1.3772	-69.9892
1.38133	-66.4935
1.38553	-62.9441
1.38967	-59.2927
1.39387	-55.4292
1.398	-51.0853
1.4022	-45.6869
1.40633	-38.2812
1.41053	-27.6857
1.41467	-12.872
1.41887	6.56887
1.423	30.1112
1.4272	56.3035
1.43133	83.1094
1.43553	108.43
1.43967	130.597
1.44387	148.67
1.448	162.479
1.4522	172.457
1.45633	179.366
1.46053	184.043
1.46467	187.215
1.46887	189.432
1.473	191.068
1.4772	192.358
1.48133	193.428
1.48553	194.325
1.48967	195.053
1.49387	195.588
1.498	195.877
1.5022	195.835
1.50633	195.334
1.51053	194.184
1.51467	192.134
1.51887	188.92
1.523	184.319
1.5272	178.203
1.53133	170.595
1.53553	161.706
1.53967	151.908
1.54387	141.678
1.548	131.535
1.5522	121.957
1.55633	113.312
1.56053	105.802
1.56467	99.4658
1.56887	94.2013
1.573	89.7967
1.5772	85.971
1.58133	82.4303
1.58553	78.912
1.58967	75.2052
1.59387	71.1578
1.598	66.6764
1.6022	61.7098
1.60633	56.2141
1.61053	50.1205
1.61467	43.3307
1.61887	35.7432
1.623	27.2917
1.6272	17.9773
1.63133	7.88995
1.63553	-2.79633
1.63967	-13.8636
1.64387	-25.0971
1.648	-36.3201
1.6522	-47.4085
1.65633	-58.2732
1.66053	-68.8279
1.66467	-78.967
1.66887	-88.5577
1.673	-97.4522
1.6772	-105.517
1.68133	-112.663
1.68553	-118.858
1.68967	-124.129
1.69387	-128.552
1.698	-132.232
1.7022	-135.29
1.70633	-137.843
1.71053	-139.995
1.71467	-141.838
1.71887	-143.437
1.723	-144.84
1.7272	-146.077
1.73133	-147.167
1.73553	-148.118
1.73967	-148.935
1.74387	-149.625
1.748	-150.191
1.7522	-150.632
1.75633	-150.944
1.76053	-151.122
1.76467	-151.162
1.76887	-151.059
1.773	-150.806
1.7772	-150.394
1.78133	-149.81
1.78553	-149.043
1.78967	-148.084
1.79387	-146.925
1.798	-145.561
1.8022	-143.99
1.80633	-142.209
1.81053	-140.215
1.81467	-138.014
1.81887	-135.614
1.823	-133.019
1.8272	-130.238
1.83133	-127.282
1.83553	-124.17
1.83967	-120.919
1.84387	-117.541
1.848	-114.043
1.8522	-110.438
1.85633	-106.743
1.86053	-102.973
1.86467	-99.1435
1.86887	-95.2644
1.873	-91.3502
1.8772	-87.4178
1.88133	-83.4812
1.88553	-79.5506
1.88967	-75.6369
1.89387	-71.7527
1.898	-67.9118
1.9022	-64.1307
1.90633	-60.4237
1.91053	-56.8016
1.91467	-53.2757
1.91887	-49.8598
1.923	-46.5659
1.9272	-43.4007
1.93133	-40.3669
1.93553	-37.4688
1.93967	-34.713
1.94387	-32.1046
1.948	-29.6468
1.9522	-27.3382
1.95633	-25.1698
1.96053	-23.129
1.96467	-21.2091
1.96887	-19.4092
1.973	-17.7289
1.9772	-16.1647
1.98133	-14.7113
1.98553	-13.3632
1.98967	-12.1151
1.99387	-10.9625
1.998	-9.90249
2.0022	-8.93178
2.00633	-8.04489
2.01053	-7.23543
2.01467	-6.49826
2.01887	-5.83218
2.023	-5.23852
2.0272	-4.71823
2.03133	-4.27135
2.03553	-3.89258
2.03967	-3.56958
2.04387	-3.29157
2.048	-3.05556
2.0522	-2.86198
2.05633	-2.70629
2.06053	-2.57874
2.06467	-2.4721
2.06887	-2.3843
2.073	-2.31569
2.0772	-2.26612
2.08133	-2.23227
2.08553	-2.20709
2.08967	-2.18352
2.09387	-2.15925
2.098	-2.1366
2.1022	-2.11844
2.10633	-2.10607
2.11053	-2.09973
2.11467	-2.09868
2.11887	-2.09964
2.123	-2.09791
2.1272	-2.09195
2.13133	-2.08632
2.13553	-2.08895
2.13967	-2.10244
2.14387	-2.11942
2.148	-2.12963
2.1522	-2.12847
2.15633	-2.11821
2.16053	-2.10618
2.16467	-2.10133
2.16887	-2.10564
2.173	-2.11018
2.1772	-2.10494
2.18133	-2.08854
2.18553	-2.06636
2.18967	-2.04416
2.19387	-2.02564
2.198	-2.01358
2.2022	-2.00928
2.20633	-2.009
2.21053	-2.00608
2.21467	-1.99857
2.21887	-1.98967
2.223	-1.98188
2.2272	-1.97624
2.23133	-1.97489
2.23553	-1.97808
2.23967	-1.98192
2.24387	-1.98328
2.248	-1.98107
2.2522	-1.97483
2.25633	-1.96754
2.26053	-1.96264
2.26467	-1.95825
2.26887	-1.94991
2.273	-1.93584
2.2772	-1.917
2.28133	-1.89524
2.28553	-1.87219
2.28967	-1.84947
2.29387	-1.82911
2.298	-1.81025
2.3022	-1.78771
2.30633	-1.75769
2.31053	-1.72144
2.31467	-1.68176
2.31887	-1.63845
2.323	-1.5901
2.3272	-1.53746
2.33133	-1.48076
2.33553	-1.41959
2.33967	-1.35699
2.34387	-1.29548
2.348	-1.23196
2.3522	-1.16155
2.35633	-1.08375
2.36053	-1.00374
2.36467	-0.92774
2.36887	-0.85688
2.373	-0.78725
2.3772	-0.71637
2.38133	-0.64636
2.38553	-0.58005
2.38967	-0.51854
2.39387	-0.46291
2.398	-0.41451
2.4022	-0.37178
2.40633	-0.33015
2.41053	-0.28746
2.41467	-0.24741
2.41887	-0.21521
2.423	-0.18873
2.4272	-0.15389
2.43133	-0.08754
2.43553	0.0327
2.43967	0.21566
2.44387	0.45449
2.448	0.7315
2.4522	1.01727
2.45633	1.27467
2.46053	1.47346
2.46467	1.60278
2.46887	1.67384
2.473	1.71037
2.4772	1.73404
2.48133	1.75947
2.48553	1.79516
2.48967	1.84293
2.49387	1.90039
2.498	1.96256
2.5022	2.02126
2.50633	2.07045
2.51053	2.11083
2.51467	2.14606
2.51887	2.17732
2.523	2.20147
2.5272	2.21255
2.53133	2.20487
2.53553	2.17518
2.53967	2.12301
2.54387	2.05085
2.548	1.9655
2.5522	1.87643
2.55633	1.78935
2.56053	1.70174
2.56467	1.60663
2.56887	1.50155
2.573	1.39298
2.5772	1.29081
2.58133	1.19942
2.58553	1.11447
2.58967	1.02836
2.59387	0.93755
2.598	0.84342
2.6022	0.74939
2.60633	0.6572
2.61053	0.56377
2.61467	0.46169
2.61887	0.3416
2.623	0.19661
2.6272	0.02747
2.63133	-0.16063
2.63553	-0.36531
2.63967	-0.58511
2.64387	-0.8146
2.648	-1.04663
2.6522	-1.27601
2.65633	-1.49834
2.66053	-1.70656
2.66467	-1.89212
2.66887	-2.0515
2.673	-2.18902
2.6772	-2.3119
2.68133	-2.42303
2.68553	-2.52046
2.68967	-2.60229
2.69387	-2.67024
2.698	-2.72959
2.7022	-2.78441
2.70633	-2.83514
2.71053	-2.88168
2.71467	-2.92306
2.71887	-2.95704
2.723	-2.98349
2.7272	-3.00222
2.73133	-3.01173
2.73553	-3.01379
2.73967	-3.01088
2.74387	-3.0025
2.748	-2.98856
2.7522	-2.96944
2.75633	-2.94492
2.76053	-2.917
2.76467	-2.88944
2.76887	-2.86427
2.773	-2.83937
2.7772	-2.81192
2.78133	-2.78372
2.78553	-2.75613
2.78967	-2.72524
2.79387	-2.68849
2.798	-2.64941
2.8022	-2.61454
2.80633	-2.58725
2.81053	-2.56443
2.81467	-2.53982
2.81887	-2.50869
2.823	-2.46963
2.8272	-2.42414
2.83133	-2.37633
2.83553	-2.33166
2.83967	-2.29254
2.84387	-2.25675
2.848	-2.22089
2.8522	-2.18262
2.85633	-2.14116
2.86053	-2.09868
2.86467	-2.05934
2.86887	-2.02613
2.873	-1.99914
2.8772	-1.97532
2.88133	-1.94996
2.88553	-1.92015
2.88967	-1.88726
2.89387	-1.8564
2.898	-1.83033
2.9022	-1.80582
2.90633	-1.77928
2.91053	-1.75187
2.91467	-1.72679
2.91887	-1.70451
2.923	-1.68371
2.9272	-1.66475
2.93133	-1.64616
2.93553	-1.62288
2.93967	-1.59313
2.94387	-1.56178
2.948	-1.53517
2.9522	-1.51426
2.95633	-1.49553
2.96053	-1.47727
2.96467	-1.46006
2.96887	-1.44407
2.973	-1.42852
2.9772	-1.4129
2.98133	-1.39923
2.98553	-1.39035
2.98967	-1.38489
2.99387	-1.37741
2.998	-1.36436
3.0022	-1.34589
3.00633	-1.32252
3.01053	-1.29629
3.01467	-1.2741
3.01887	-1.26259
3.023	-1.26003
3.0272	-1.2568
3.03133	-1.24381
3.03553	-1.22052
3.03967	-1.19509
3.04387	-1.17643
3.048	-1.1659
3.0522	-1.15848
3.05633	-1.15143
3.06053	-1.14492
3.06467	-1.13652
3.06887	-1.12315
3.073	-1.10663
3.0772	-1.09174
3.08133	-1.08156
3.08553	-1.07687
3.08967	-1.07517
3.09387	-1.07067
3.098	-1.05987
3.1022	-1.04511
3.10633	-1.03132
3.11053	-1.02038
3.11467	-1.00997
3.11887	-0.99934
3.123	-0.99338
3.1272	-0.9946
3.13133	-0.99706
3.13553	-0.99495
3.13967	-0.98862
3.14387	-0.97939
3.148	-0.96834
3.1522	-0.95879
3.15633	-0.95249
3.16053	-0.94815
3.16467	-0.94515
3.16887	-0.94277
3.173	-0.93949
3.1772	-0.93507
3.18133	-0.92895
3.18553	-0.92042
3.18967	-0.91158
3.19387	-0.90586
3.198	-0.90467
3.2022	-0.90767
3.20633	-0.91392
3.21053	-0.9196
3.21467	-0.91826
3.21887	-0.90744
3.223	-0.89151
3.2272	-0.87688
3.23133	-0.86876
3.23553	-0.87133
3.23967	-0.88445
3.24387	-0.90077
3.248	-0.91048
3.2522	-0.90915
3.25633	-0.90032
3.26053	-0.89018
3.26467	-0.8815
3.26887	-0.87327
3.273	-0.86452
3.2772	-0.85702
3.28133	-0.85327
3.28553	-0.85324
3.28967	-0.85449
3.29387	-0.85532
3.298	-0.85675
3.3022	-0.85949
3.30633	-0.86139
3.31053	-0.86127
3.31467	-0.86142
3.31887	-0.86258
3.323	-0.86241
3.3272	-0.86123
3.33133	-0.86143
3.33553	-0.86299
3.33967	-0.86464
3.34387	-0.86563
3.348	-0.86603
3.3522	-0.8677
3.35633	-0.87124
3.36053	-0.87408
3.36467	-0.87501
3.36887	-0.87583
3.373	-0.87765
3.3772	-0.8788
3.38133	-0.87777
3.38553	-0.87601
3.38967	-0.8741
3.39387	-0.87104
3.398	-0.86871
3.4022	-0.86904
3.40633	-0.86949
3.41053	-0.86642
3.41467	-0.85918
3.41887	-0.85149
3.423	-0.84839
3.4272	-0.84974
3.43133	-0.84964
3.43553	-0.84318
3.43967	-0.83098
3.44387	-0.81801
3.448	-0.81125
3.4522	-0.81596
3.45633	-0.82871
3.46053	-0.83851
3.46467	-0.83868
3.46887	-0.83237
3.473	-0.82778
3.4772	-0.83063
3.48133	-0.83854
3.48553	-0.84244
3.48967	-0.83614
3.49387	-0.82292
3.498	-0.81073
3.5022	-0.80418
3.50633	-0.80212
3.51053	-0.80026
3.51467	-0.79675
3.51887	-0.79374
3.523	-0.79277
3.5272	-0.79357
3.53133	-0.79726
3.53553	-0.80386
3.53967	-0.80934
3.54387	-0.80981
3.548	-0.80636
3.5522	-0.80399
3.55633	-0.80495
3.56053	-0.80766
3.56467	-0.81248
3.56887	-0.81961
3.573	-0.82465
3.5772	-0.82484
3.58133	-0.8227
3.58553	-0.82025
3.58967	-0.81794
3.59387	-0.81906
3.598	-0.82546
3.6022	-0.83174
3.60633	-0.83242
3.61053	-0.8305
3.61467	-0.83404
3.61887	-0.84543
3.623	-0.85762
3.6272	-0.86288
3.63133	-0.86178
3.63553	-0.86074
3.63967	-0.86259
3.64387	-0.86408
3.648	-0.8618
3.6522	-0.85765
3.65633	-0.85824
3.66053	-0.86586
3.66467	-0.87424
3.66887	-0.87767
3.673	-0.87563
3.6772	-0.8694
3.68133	-0.86271
3.68553	-0.86033
3.68967	-0.86255
3.69387	-0.86686
3.698	-0.87287
3.7022	-0.87946
3.70633	-0.88245
3.71053	-0.87953
3.71467	-0.87425
3.71887	-0.87396
3.723	-0.88182
3.7272	-0.89127
3.73133	-0.89263
3.73553	-0.88449
3.73967	-0.87503
3.74387	-0.87036
3.748	-0.86717
3.7522	-0.86005
3.75633	-0.8494
3.76053	-0.84031
3.76467	-0.83752
3.76887	-0.84074
3.773	-0.84672
3.7772	-0.85484
3.78133	-0.86463
3.78553	-0.87234
3.78967	-0.87541
3.79387	-0.87437
3.798	-0.86926
3.8022	-0.86092
3.80633	-0.8543
3.81053	-0.85309
3.81467	-0.85414
3.81887	-0.85236
3.823	-0.84764
3.8272	-0.84449
3.83133	-0.84517
3.83553	-0.84744
3.83967	-0.85006
3.84387	-0.853
3.848	-0.85409
3.8522	-0.8516
3.85633	-0.84656
3.86053	-0.84229
3.86467	-0.8428
3.86887	-0.84782
3.873	-0.85168
3.8772	-0.85028
3.88133	-0.84616
3.88553	-0.84524
3.88967	-0.84904
3.89387	-0.85288
3.898	-0.85266
3.9022	-0.85048
3.90633	-0.853
3.91053	-0.86377
3.91467	-0.8784
3.91887	-0.88825
3.923	-0.88804
3.9272	-0.87912
3.93133	-0.86605
3.93553	-0.85276
3.93967	-0.842
3.94387	-0.83496
3.948	-0.83149
3.9522	-0.83073
3.95633	-0.83118
3.96053	-0.83116
3.96467	-0.82893
3.96887	-0.82394
3.973	-0.81917
3.9772	-0.81818
3.98133	-0.82003
3.98553	-0.82175
3.98967	-0.82386
3.99387	-0.82789
3.998	-0.83117
4.0022	-0.8281
4.00633	-0.81619
4.01053	-0.79932
4.01467	-0.78209
4.01887	-0.76604
4.023	-0.7544
4.0272	-0.7496
4.03133	-0.74789
4.03553	-0.74467
4.03967	-0.738
4.04387	-0.7255
4.048	-0.70566
4.0522	-0.68161
4.05633	-0.65919
4.06053	-0.64238
4.06467	-0.63214
4.06887	-0.62672
4.073	-0.62231
4.0772	-0.61577
4.08133	-0.60643
4.08553	-0.59557
4.08967	-0.5866
4.09387	-0.58447
4.098	-0.59171
4.1022	-0.60435
4.10633	-0.61248
4.11053	-0.60742
4.11467	-0.58907
4.11887	-0.56616
4.123	-0.54955
4.1272	-0.54323
4.13133	-0.54222
4.13553	-0.54009
4.13967	-0.53568
4.14387	-0.53197
4.148	-0.53133
4.1522	-0.53335
4.15633	-0.53602
4.16053	-0.5377
4.16467	-0.53789
4.16887	-0.53807
4.173	-0.54118
4.1772	-0.54906
4.18133	-0.56244
4.18553	-0.58098
4.18967	-0.60174
4.19387	-0.61924
4.198	-0.62691
4.2022	-0.62169
4.20633	-0.60769
4.21053	-0.59283
4.21467	-0.58403
4.21887	-0.58437
4.223	-0.59262
4.2272	-0.60663
4.23133	-0.62646
4.23553	-0.65141
4.23967	-0.67596
4.24387	-0.69218
4.248	-0.69632
4.2522	-0.69159
4.25633	-0.68522
4.26053	-0.68451
4.26467	-0.69296
4.26887	-0.70772
4.273	-0.72258
4.2772	-0.73301
4.28133	-0.73907
4.28553	-0.74527
4.28967	-0.75671
4.29387	-0.77454
4.298	-0.79615
4.3022	-0.81858
4.30633	-0.83948
4.31053	-0.85604
4.31467	-0.86707
4.31887	-0.87579
4.323	-0.88761
4.3272	-0.90447
4.33133	-0.9228
4.33553	-0.93758
4.33967	-0.94709
4.34387	-0.95354
4.348	-0.96014
4.3522	-0.96721
4.35633	-0.97331
4.36053	-0.97957
4.36467	-0.99022
4.36887	-1.0073
4.373	-1.02517
4.3772	-1.03523
4.38133	-1.03517
4.38553	-1.02993
4.38967	-1.02713
4.39387	-1.0331
4.398	-1.04819
4.4022	-1.06494
4.40633	-1.07484
4.41053	-1.07678
4.41467	-1.07617
4.41887	-1.07806
4.423	-1.08339
4.4272	-1.09055
4.43133	-1.09874
4.43553	-1.10937
4.43967	-1.12461
4.44387	-1.14438
4.448	-1.16559
4.4522	-1.18412
4.45633	-1.19579
4.46053	-1.19724
4.46467	-1.18843
4.46887	-1.17242
4.473	-1.15308
4.4772	-1.13556
4.48133	-1.12536
4.48553	-1.12331
4.48967	-1.12447
4.49387	-1.12386
4.498	-1.12027
4.5022	-1.11476
4.50633	-1.10881
4.51053	-1.10309
4.51467	-1.09707
4.51887	-1.09044
4.523	-1.08356
4.5272	-1.07628
4.53133	-1.06781
4.53553	-1.05793
4.53967	-1.04731
4.54387	-1.03627
4.548	-1.02511
4.5522	-1.01551
4.55633	-1.0083
4.56053	-1.0009
4.56467	-0.98946
4.56887	-0.97297
4.573	-0.95501
4.5772	-0.94138
4.58133	-0.93443
4.58553	-0.93088
4.58967	-0.92624
4.59387	-0.91715
4.598	-0.89992
4.6022	-0.87267
4.60633	-0.8382
4.61053	-0.80234
4.61467	-0.76986
4.61887	-0.74128
4.623	-0.71504
4.6272	-0.69148
4.63133	-0.67168
4.63553	-0.65289
4.63967	-0.62912
4.64387	-0.59752
4.648	-0.56148
4.6522	-0.52735
4.65633	-0.50027
4.66053	-0.48178
4.66467	-0.46795
4.66887	-0.44938
4.673	-0.41804
4.6772	-0.37415
4.68133	-0.32344
4.68553	-0.27183
4.68967	-0.22346
4.69387	-0.17983
4.698	-0.14009
4.7022	-0.10286
4.70633	-0.06742
4.71053	-0.03247
4.71467	0.00513
4.71887	0.04815
4.723	0.09481
4.7272	0.13915
4.73133	0.17832
4.73553	0.21727
4.73967	0.26339
4.74387	0.31953
4.748	0.38392
4.7522	0.45227
4.75633	0.51781
4.76053	0.57387
4.76467	0.61901
4.76887	0.65849
4.773	0.70012
4.7772	0.74845
4.78133	0.80286
4.78553	0.86118
4.78967	0.9213
4.79387	0.97843
4.798	1.0286
4.8022	1.07592
4.80633	1.13
4.81053	1.19615
4.81467	1.27005
4.81887	1.34189
4.823	1.40621
4.8272	1.46704
4.83133	1.53066
4.83553	1.59776
4.83967	1.6666
4.84387	1.7361
4.848	1.80398
4.8522	1.86836
4.85633	1.93056
4.86053	1.993
4.86467	2.05533
4.86887	2.11511
4.873	2.17331
4.8772	2.23336
4.88133	2.2951
4.88553	2.35687
4.88967	2.42088
4.89387	2.49081
4.898	2.56772
4.9022	2.64992
4.90633	2.73393
4.91053	2.81502
4.91467	2.88898
4.91887	2.95469
4.923	3.01468
4.9272	3.07259
4.93133	3.13127
4.93553	3.19435
4.93967	3.26576
4.94387	3.34582
4.948	3.42947
4.9522	3.50994
4.95633	3.5853
4.96053	3.65758
4.96467	3.72613
4.96887	3.79063
4.973	3.85772
4.9772	3.93521
4.98133	4.02327
4.98553	4.11498
4.98967	4.20142
4.99387	4.27682
4.998	4.34215
5.0022	4.40446
5.00633	4.47091
5.01053	4.54337
5.01467	4.62119
5.01887	4.70489
5.023	4.79298
5.0272	4.8805
5.03133	4.96354
5.03553	5.04228
5.03967	5.11914
5.04387	5.19492
5.048	5.26835
5.0522	5.33912
5.05633	5.4094
5.06053	5.48258
5.06467	5.56071
5.06887	5.64234
5.073	5.72383
5.0772	5.80253
5.08133	5.87846
5.08553	5.95362
5.08967	6.03054
5.09387	6.11025
5.098	6.1911
5.1022	6.27003
5.10633	6.34514
5.11053	6.41658
5.11467	6.48412
5.11887	6.54788
5.123	6.61324
5.1272	6.68748
5.13133	6.77164
5.13553	6.85975
5.13967	6.94385
5.14387	7.01991
5.148	7.08971
5.1522	7.15709
5.15633	7.22469
5.16053	7.29436
5.16467	7.36634
5.16887	7.43653
5.173	7.50095
5.1772	7.5638
5.18133	7.63263
5.18553	7.70822
5.18967	7.7849
5.19387	7.85689
5.198	7.923
5.2022	7.98569
5.20633	8.0467
5.21053	8.1064
5.21467	8.16523
5.21887	8.22368
5.223	8.28111
5.2272	8.33587
5.23133	8.38708
5.23553	8.43694
5.23967	8.49139
5.24387	8.55457
5.248	8.62282
5.2522	8.68803
5.25633	8.74542
5.26053	8.79588
5.26467	8.84319
5.26887	8.89192
5.273	8.94374
5.2772	8.99578
5.28133	9.04634
5.28553	9.09637
5.28967	9.14478
5.29387	9.18842
5.298	9.22696
5.3022	9.26543
5.30633	9.30927
5.31053	9.35807
5.31467	9.40651
5.31887	9.45018
5.323	9.49018
5.3272	9.53181
5.33133	9.57856
5.33553	9.62722
5.33967	9.67139
5.34387	9.70996
5.348	9.74688
5.3522	9.78566
5.35633	9.82811
5.36053	9.87427
5.36467	9.92106
5.36887	9.96303
5.373	9.99672
5.3772	10.0248
5.38133	10.0549
5.38553	10.0931
5.38967	10.1374
5.39387	10.1793
5.398	10.2135
5.4022	10.2452
5.40633	10.2837
5.41053	10.3301
5.41467	10.3769
5.41887	10.4168
5.423	10.4492
5.4272	10.4788
5.43133	10.5108
5.43553	10.5461
5.43967	10.58
5.44387	10.6074
5.448	10.6291
5.4522	10.6529
5.45633	10.6863
5.46053	10.7284
5.46467	10.7705
5.46887	10.8041
5.473	10.8309
5.4772	10.8591
5.48133	10.8919
5.48553	10.9247
5.48967	10.953
5.49387	10.9793
5.498	11.0091
5.5022	11.0442
5.50633	11.0811
5.51053	11.1143
5.51467	11.1406
5.51887	11.1613
5.523	11.1816
5.5272	11.2045
5.53133	11.2295
5.53553	11.2569
5.53967	11.2876
5.54387	11.3199
5.548	11.3529
5.5522	11.388
5.55633	11.4241
5.56053	11.458
5.56467	11.4882
5.56887	11.5153
5.573	11.5407
5.5772	11.5629
5.58133	11.5782
5.58553	11.5859
5.58967	11.5895
5.59387	11.5958
5.598	11.6115
5.6022	11.6387
5.60633	11.6718
5.61053	11.7041
5.61467	11.7334
5.61887	11.7615
5.623	11.791
5.6272	11.8204
5.63133	11.8449
5.63553	11.8628
5.63967	11.8755
5.64387	11.8851
5.648	11.8973
5.6522	11.9187
5.65633	11.9494
5.66053	11.9823
5.66467	12.0095
5.66887	12.0273
5.673	12.0353
5.6772	12.0373
5.68133	12.0434
5.68553	12.0625
5.68967	12.092
5.69387	12.1224
5.698	12.1463
5.7022	12.1618
5.70633	12.1721
5.71053	12.1813
5.71467	12.1915
5.71887	12.2034
5.723	12.2185
5.7272	12.2374
5.73133	12.2587
5.73553	12.28
5.73967	12.299
5.74387	12.3153
5.748	12.3306
5.7522	12.3467
5.75633	12.3616
5.76053	12.371
5.76467	12.3736
5.76887	12.3752
5.773	12.3857
5.7772	12.4109
5.78133	12.4462
5.78553	12.4794
5.78967	12.5033
5.79387	12.5213
5.798	12.5422
5.8022	12.5715
5.80633	12.6074
5.81053	12.6423
5.81467	12.6694
5.81887	12.6912
5.823	12.7191
5.8272	12.7621
5.83133	12.8168
5.83553	12.872
5.83967	12.919
5.84387	12.9561
5.848	12.986
5.8522	13.0143
5.85633	13.0461
5.86053	13.0815
5.86467	13.1155
5.86887	13.1414
5.873	13.1582
5.8772	13.1697
5.88133	13.1766
5.88553	13.1759
5.88967	13.1673
5.89387	13.1567
5.898	13.1499
5.9022	13.1453
5.90633	13.1361
5.91053	13.1177
5.91467	13.0932
5.91887	13.0701
5.923	13.0528
5.9272	13.0404
5.93133	13.0298
5.93553	13.0193
5.93967	13.0096
5.94387	13.0002
5.948	12.9898
5.9522	12.9797
5.95633	12.9743
5.96053	12.9752
5.96467	12.9795
5.96887	12.9834
5.973	12.9862
5.9772	12.9875
5.98133	12.986
5.98553	12.9802
5.98967	12.9701
5.99387	12.9588
5.998	12.9532
6.0022	12.959
6.00633	12.9739
6.01053	12.9887
6.01467	12.9957
6.01887	12.9964
6.023	12.9958
6.0272	12.9952
6.03133	12.9955
6.03553	12.9986
6.03967	13.0025
6.04387	13.0042
6.048	13.0042
6.0522	13.0055
6.05633	13.0107
6.06053	13.0198
6.06467	13.0294
6.06887	13.0361
6.073	13.0367
6.0772	13.0298
6.08133	13.0217
6.08553	13.0211
6.08967	13.0284
6.09387	13.0387
6.098	13.0496
6.1022	13.0607
6.10633	13.0694
6.11053	13.0724
6.11467	13.0718
6.11887	13.0725
6.123	13.0759
6.1272	13.0794
6.13133	13.08
6.13553	13.0787
6.13967	13.078
6.14387	13.0782
6.148	13.0807
6.1522	13.0868
6.15633	13.0944
6.16053	13.1021
6.16467	13.1121
6.16887	13.1219
6.173	13.1258
6.1772	13.1251
6.18133	13.1267
6.18553	13.1325
6.18967	13.1376
6.19387	13.1389
6.198	13.1399
6.2022	13.1449
6.20633	13.1514
6.21053	13.1523
6.21467	13.1474
6.21887	13.1435
6.223	13.1454
6.2272	13.1504
6.23133	13.154
6.23553	13.1577
6.23967	13.1652
6.24387	13.173
6.248	13.1738
6.2522	13.1679
6.25633	13.1625
6.26053	13.161
6.26467	13.1599
6.26887	13.1565
6.273	13.154
6.2772	13.1567
6.28133	13.1617
6.28553	13.1625
6.28967	13.1577
6.29387	13.1517
6.298	13.149
6.3022	13.1481
6.30633	13.1441
6.31053	13.1378
6.31467	13.1364
6.31887	13.1429
6.323	13.1526
6.3272	13.1604
6.33133	13.1662
6.33553	13.1722
6.33967	13.1811
6.34387	13.1928
6.348	13.2039
6.3522	13.212
6.35633	13.2161
6.36053	13.216
6.36467	13.2142
6.36887	13.215
6.373	13.2191
6.3772	13.2219
6.38133	13.2184
6.38553	13.2093
6.38967	13.2006
6.39387	13.1973
6.398	13.1987
6.4022	13.1995
6.40633	13.1947
6.41053	13.1828
6.41467	13.1672
6.41887	13.153
6.423	13.1429
6.4272	13.1375
6.43133	13.1344
6.43553	13.13
6.43967	13.1247
6.44387	13.122
6.448	13.122
6.4522	13.1229
6.45633	13.1235
6.46053	13.1262
6.46467	13.134
6.46887	13.146
6.473	13.1577
6.4772	13.1652
6.48133	13.1668
6.48553	13.1618
6.48967	13.152
6.49387	13.1421
6.498	13.1355
6.5022	13.1314
6.50633	13.128
6.51053	13.1255
6.51467	13.1251
6.51887	13.1274
6.523	13.1313
6.5272	13.1359
6.53133	13.1406
6.53553	13.1436
6.53967	13.1433
6.54387	13.1403
6.548	13.1365
6.5522	13.1341
6.55633	13.1328
6.56053	13.1294
6.56467	13.124
6.56887	13.1194
6.573	13.1167
6.5772	13.1167
6.58133	13.1213
6.58553	13.1313
6.58967	13.1447
6.59387	13.1572
6.598	13.1642
6.6022	13.1637
6.60633	13.1598
6.61053	13.1594
6.61467	13.1656
6.61887	13.1756
6.623	13.1842
6.6272	13.1885
6.63133	13.1898
6.63553	13.1921
6.63967	13.1988
6.64387	13.2112
6.648	13.2303
6.6522	13.2546
6.65633	13.2778
6.66053	13.2948
6.66467	13.3045
6.66887	13.3089
6.673	13.3145
6.6772	13.3267
6.68133	13.3411
6.68553	13.3487
6.68967	13.3465
6.69387	13.3399
6.698	13.3348
6.7022	13.3303
6.70633	13.3251
6.71053	13.3194
6.71467	13.3099
6.71887	13.2922
6.723	13.2686
6.7272	13.2475
6.73133	13.2356
6.73553	13.2337
6.73967	13.2358
6.74387	13.2348
6.748	13.2307
6.7522	13.2314
6.75633	13.2401
6.76053	13.2517
6.76467	13.2632
6.76887	13.279
6.773	13.3023
6.7772	13.3292
6.78133	13.3559
6.78553	13.3836
6.78967	13.4136
6.79387	13.4445
6.798	13.4783
6.8022	13.5207
6.80633	13.5736
6.81053	13.6336
6.81467	13.6973
6.81887	13.763
6.823	13.8286
6.8272	13.8923
6.83133	13.9519
6.83553	14.0056
6.83967	14.0537
6.84387	14.0964
6.848	14.1315
6.8522	14.1585
6.85633	14.18
6.86053	14.1962
6.86467	14.2038
6.86887	14.2038
6.873	14.2008
6.8772	14.1934
6.88133	14.1764
6.88553	14.1511
6.88967	14.1232
6.89387	14.092
6.898	14.0522
6.9022	14.0052
6.90633	13.9601
6.91053	13.9244
6.91467	13.8961
6.91887	13.8662
6.923	13.8288
6.9272	13.7873
6.93133	13.7489
6.93553	13.7174
6.93967	13.692
6.94387	13.6684
6.948	13.6412
6.9522	13.6109
6.95633	13.5829
6.96053	13.56
6.96467	13.5415
6.96887	13.5287
6.973	13.5235
6.9772	13.5213
6.98133	13.515
6.98553	13.5045
6.98967	13.4934
6.99387	13.4833
6.998	13.4753
7.0022	13.4712
7.00633	13.4698
7.01053	13.4719
7.01467	13.4803
7.01887	13.4932
7.023	13.5046
7.0272	13.512
7.03133	13.5181
7.03553	13.5236
7.03967	13.5266
7.04387	13.5269
7.048	13.5273
7.0522	13.5304
7.05633	13.5369
7.06053	13.5435
7.06467	13.5476
7.06887	13.5494
7.073	13.5502
7.0772	13.551
7.08133	13.5516
7.08553	13.5504
7.08967	13.546
7.09387	13.5432
7.098	13.5484
7.1022	13.5602
7.10633	13.57
7.11053	13.5739
7.11467	13.5738
7.11887	13.5721
7.123	13.571
7.1272	13.5715
7.13133	13.5716
7.13553	13.5719
7.13967	13.5763
7.14387	13.5831
7.148	13.586
7.1522	13.5846
7.15633	13.5867
7.16053	13.5973
7.16467	13.6112
7.16887	13.6193
7.173	13.6192
7.1772	13.6146
7.18133	13.6092
7.18553	13.6057
7.18967	13.6046
7.19387	13.6033
7.198	13.6019
7.2022	13.6022
7.20633	13.6041
7.21053	13.6083
7.21467	13.6171
7.21887	13.6283
7.223	13.6377
7.2272	13.6418
7.23133	13.6395
7.23553	13.6348
7.23967	13.6325
7.24387	13.6331
7.248	13.6357
7.2522	13.6423
7.25633	13.6539
7.26053	13.6686
7.26467	13.6817
7.26887	13.6888
7.273	13.6901
7.2772	13.6905
7.28133	13.6934
7.28553	13.6975
7.28967	13.6984
7.29387	13.6961
7.298	13.6949
7.3022	13.6969
7.30633	13.7023
7.31053	13.7104
7.31467	13.7182
7.31887	13.7208
7.323	13.7159
7.3272	13.7076
7.33133	13.7041
7.33553	13.7087
7.33967	13.716
7.34387	13.72
7.348	13.7213
7.3522	13.7238
7.35633	13.7275
7.36053	13.7277
7.36467	13.722
7.36887	13.7156
7.373	13.7154
7.3772	13.7216
7.38133	13.7292
7.38553	13.7331
7.38967	13.7327
7.39387	13.732
7.398	13.7339
7.4022	13.7345
7.40633	13.7293
7.41053	13.7207
7.41467	13.7144
7.41887	13.712
7.423	13.7136
7.4272	13.7185
7.43133	13.7229
7.43553	13.7249
7.43967	13.7244
7.44387	13.7215
7.448	13.7183
7.4522	13.7176
7.45633	13.7194
7.46053	13.7251
7.46467	13.7379
7.46887	13.7562
7.473	13.7755
7.4772	13.7935
7.48133	13.8122
7.48553	13.8352
7.48967	13.8638
7.49387	13.8944
7.498	13.9259
7.5022	13.9632
7.50633	14.0109
7.51053	14.0667
7.51467	14.1255
7.51887	14.1842
7.523	14.239
7.5272	14.2844
7.53133	14.3198
7.53553	14.3502
7.53967	14.3775
7.54387	14.3979
7.548	14.4082
7.5522	14.4076
7.55633	14.3947
7.56053	14.3689
7.56467	14.3311
7.56887	14.284
7.573	14.2334
7.5772	14.1879
7.58133	14.1516
7.58553	14.1196
7.58967	14.0842
7.59387	14.0436
7.598	14.0033
7.6022	13.9705
7.60633	13.946
7.61053	13.9243
7.61467	13.9036
7.61887	13.8896
7.623	13.8861
7.6272	13.8878
7.63133	13.8849
7.63553	13.8745
7.63967	13.8614
7.64387	13.8497
7.648	13.8383
7.6522	13.8276
7.65633	13.8202
7.66053	13.8163
7.66467	13.8139
7.66887	13.8116
7.673	13.807
7.6772	13.7987
7.68133	13.791
7.68553	13.79
7.68967	13.7942
7.69387	13.7971
7.698	13.7969
7.7022	13.8001
7.70633	13.8126
7.71053	13.8307
7.71467	13.845
7.71887	13.8529
7.723	13.86
7.7272	13.8692
7.73133	13.8757
7.73553	13.8764
7.73967	13.8776
7.74387	13.8874
7.748	13.9071
7.7522	13.9272
7.75633	13.9358
7.76053	13.9297
7.76467	13.9169
7.76887	13.9062
7.773	13.8984
7.7772	13.8875
7.78133	13.8723
7.78553	13.859
7.78967	13.8509
7.79387	13.8445
7.798	13.8382
7.8022	13.8321
7.80633	13.8232
7.81053	13.8102
7.81467	13.7953
7.81887	13.781
7.823	13.771
7.8272	13.7703
7.83133	13.7792
7.83553	13.7905
7.83967	13.7963
7.84387	13.797
7.848	13.7986
7.8522	13.8039
7.85633	13.8128
7.86053	13.8256
7.86467	13.8396
7.86887	13.8497
7.873	13.8559
7.8772	13.8632
7.88133	13.873
7.88553	13.8826
7.88967	13.8917
7.89387	13.902
7.898	13.9126
7.9022	13.9241
7.90633	13.9389
7.91053	13.9548
7.91467	13.9663
7.91887	13.9738
7.923	13.9849
7.9272	14.0054
7.93133	14.0338
7.93553	14.0653
7.93967	14.0951
7.94387	14.1206
7.948	14.1389
7.9522	14.1483
7.95633	14.1543
7.96053	14.1663
7.96467	14.1864
7.96887	14.2117
7.973	14.2389
7.9772	14.2628
7.98133	14.2792
7.98553	14.2876
7.98967	14.2886
7.99387	14.2825
7.998	14.2719
8.0022	14.2591
8.00633	14.2438
8.01053	14.2249
8.01467	14.2018
8.01887	14.1745
8.023	14.1465
8.0272	14.122
8.03133	14.099
8.03553	14.0722
8.03967	14.0385
8.04387	13.9995
8.048	13.9629
8.0522	13.9358
8.05633	13.9174
8.06053	13.9008
8.06467	13.8811
8.06887	13.8624
8.073	13.8508
8.0772	13.8449
8.08133	13.8413
8.08553	13.8397
8.08967	13.8399
8.09387	13.8383
8.098	13.8324
8.1022	13.8247
8.10633	13.821
8.11053	13.8249
8.11467	13.8354
8.11887	13.847
8.123	13.853
8.1272	13.8536
8.13133	13.8536
8.13553	13.8555
8.13967	13.8597
8.14387	13.8676
8.148	13.8801
8.1522	13.8944
8.15633	13.9076
8.16053	13.9223
8.16467	13.9452
8.16887	13.9811
8.173	14.0307
8.1772	14.0906
8.18133	14.1538
8.18553	14.2163
8.18967	14.2849
8.19387	14.3703
8.198	14.4742
8.2022	14.5919
8.20633	14.7191
8.21053	14.8542
8.21467	14.9967
8.21887	15.1429
8.223	15.2849
8.2272	15.4163
8.23133	15.5321
8.23553	15.627
8.23967	15.7
8.24387	15.7533
8.248	15.7866
8.2522	15.7958
8.25633	15.7744
8.26053	15.7192
8.26467	15.6358
8.26887	15.5335
8.273	15.4162
8.2772	15.2838
8.28133	15.1392
8.28553	14.9872
8.28967	14.8319
8.29387	14.6815
8.298	14.5476
8.3022	14.4341
8.30633	14.3366
8.31053	14.2519
8.31467	14.1803
8.31887	14.1195
8.323	14.0641
8.3272	14.0136
[truncated: 5,317 more rows]

## Sheet: 4i - PI and EocePI
PI					Eoce PI
Retention Time (minutes)	Absorbance at 214nm				Retention Time (minutes)	Absorbance at 214nm
0.00215	0				0.0022	0
0.00635	-0.01145				0.006333	-0.0125
0.010483	-0.07823				0.010533	-0.08427
0.014683	-0.25159				0.014667	-0.26786
0.018817	-0.52157				0.018867	-0.55024
0.023017	-0.81086				0.023	-0.85009
0.02715	-1.04318				0.0272	-1.08896
0.03135	-1.18935				0.031333	-1.23563
0.035483	-1.25903				0.035533	-1.30088
0.039683	-1.27597				0.039667	-1.3157
0.043817	-1.26288				0.043867	-1.30953
0.048017	-1.23705				0.048	-1.2991
0.05215	-1.21227				0.0522	-1.29052
0.05635	-1.20032				0.056333	-1.28504
0.060483	-1.20585				0.060533	-1.28386
0.064683	-1.22266				0.064667	-1.2886
0.068817	-1.24093				0.068867	-1.29683
0.073017	-1.2547				0.073	-1.30232
0.07715	-1.25894				0.0772	-1.3025
0.08135	-1.24844				0.081333	-1.30178
0.085483	-1.22568				0.085533	-1.30613
0.089683	-1.2029				0.089667	-1.31602
0.093817	-1.19251				0.093867	-1.32645
0.098017	-1.19824				0.098	-1.33296
0.10215	-1.21479				0.1022	-1.33646
0.10635	-1.23199				0.106333	-1.34101
0.110483	-1.24065				0.110533	-1.34752
0.114683	-1.23975				0.114667	-1.35461
0.118817	-1.2371				0.118867	-1.36269
0.123017	-1.23767				0.123	-1.37
0.12715	-1.23497				0.1272	-1.37126
0.13135	-1.22031				0.131333	-1.3648
0.135483	-1.19583				0.135533	-1.35539
0.139683	-1.17386				0.139667	-1.34806
0.143817	-1.16613				0.143867	-1.34301
0.148017	-1.17532				0.148	-1.33835
0.15215	-1.19527				0.1522	-1.3338
0.15635	-1.21674				0.156333	-1.3299
0.160483	-1.23373				0.160533	-1.3269
0.164683	-1.24537				0.164667	-1.32475
0.168817	-1.25066				0.168867	-1.32315
0.173017	-1.2457				0.173	-1.32219
0.17715	-1.23075				0.1772	-1.32226
0.18135	-1.21506				0.181333	-1.3219
0.185483	-1.2092				0.185533	-1.31969
0.189683	-1.21445				0.189667	-1.31812
0.193817	-1.22168				0.193867	-1.31994
0.198017	-1.22024				0.198	-1.32211
0.20215	-1.20945				0.2022	-1.31827
0.20635	-1.19769				0.206333	-1.30754
0.210483	-1.18877				0.210533	-1.29748
0.214683	-1.18087				0.214667	-1.29658
0.218817	-1.17731				0.218867	-1.30611
0.223017	-1.18446				0.223	-1.32131
0.22715	-1.19994				0.2272	-1.3378
0.23135	-1.21295				0.231333	-1.35407
0.235483	-1.21432				0.235533	-1.36898
0.239683	-1.20109				0.239667	-1.3798
0.243817	-1.17633				0.243867	-1.38203
0.248017	-1.14784				0.248	-1.37199
0.25215	-1.12501				0.2522	-1.35255
0.25635	-1.11557				0.256333	-1.33356
0.260483	-1.12071				0.260533	-1.3228
0.264683	-1.13386				0.264667	-1.32048
0.268817	-1.14882				0.268867	-1.32402
0.273017	-1.16553				0.273	-1.331
0.27715	-1.18479				0.2772	-1.33833
0.28135	-1.20364				0.281333	-1.34403
0.285483	-1.21957				0.285533	-1.34821
0.289683	-1.2326				0.289667	-1.35089
0.293817	-1.23954				0.293867	-1.35134
0.298017	-1.23584				0.298	-1.34898
0.30215	-1.2233				0.3022	-1.344
0.30635	-1.20721				0.306333	-1.33717
0.310483	-1.19219				0.310533	-1.33016
0.314683	-1.18506				0.314667	-1.32538
0.318817	-1.19037				0.318867	-1.32451
0.323017	-1.20119				0.323	-1.32734
0.32715	-1.20532				0.3272	-1.33076
0.33135	-1.1995				0.331333	-1.33211
0.335483	-1.19019				0.335533	-1.33449
0.339683	-1.18467				0.339667	-1.34127
0.343817	-1.18619				0.343867	-1.34863
0.348017	-1.19444				0.348	-1.34946
0.35215	-1.20711				0.3522	-1.34122
0.35635	-1.22022				0.356333	-1.32983
0.360483	-1.22883				0.360533	-1.32536
0.364683	-1.22921				0.364667	-1.33148
0.368817	-1.22093				0.368867	-1.3416
0.373017	-1.2073				0.373	-1.34546
0.37715	-1.19377				0.3772	-1.33695
0.38135	-1.18441				0.381333	-1.31754
0.385483	-1.18081				0.385533	-1.29469
0.389683	-1.183				0.389667	-1.27647
0.393817	-1.18763				0.393867	-1.2663
0.398017	-1.1905				0.398	-1.2621
0.40215	-1.19152				0.4022	-1.25965
0.40635	-1.19024				0.406333	-1.25592
0.410483	-1.18327				0.410533	-1.25197
0.414683	-1.17237				0.414667	-1.25331
0.418817	-1.1663				0.418867	-1.2648
0.423017	-1.16943				0.423	-1.28662
0.42715	-1.17651				0.4272	-1.31563
0.43135	-1.17966				0.431333	-1.34637
0.435483	-1.17342				0.435533	-1.37114
0.439683	-1.15769				0.439667	-1.38188
0.443817	-1.14092				0.443867	-1.37678
0.448017	-1.13399				0.448	-1.36532
0.45215	-1.13897				0.4522	-1.35897
0.45635	-1.14952				0.456333	-1.35817
0.460483	-1.16118				0.460533	-1.35638
0.464683	-1.17537				0.464667	-1.35163
0.468817	-1.19253				0.468867	-1.34511
0.473017	-1.20738				0.473	-1.33674
0.47715	-1.21318				0.4772	-1.32883
0.48135	-1.20577				0.481333	-1.32437
0.485483	-1.18427				0.485533	-1.32325
0.489683	-1.15317				0.489667	-1.32513
0.493817	-1.12209				0.493867	-1.32885
0.498017	-1.09931				0.498	-1.33174
0.50215	-1.08728				0.5022	-1.33466
0.50635	-1.08663				0.506333	-1.34117
0.510483	-1.09965				0.510533	-1.35136
0.514683	-1.1259				0.514667	-1.36053
0.518817	-1.15826				0.518867	-1.36312
0.523017	-1.18572				0.523	-1.35712
0.52715	-1.19816				0.5272	-1.34421
0.53135	-1.19218				0.531333	-1.32816
0.535483	-1.17547				0.535533	-1.31402
0.539683	-1.16149				0.539667	-1.30496
0.543817	-1.15897				0.543867	-1.30098
0.548017	-1.16764				0.548	-1.30251
0.55215	-1.17926				0.5522	-1.31113
0.55635	-1.18243				0.556333	-1.32623
0.560483	-1.17222				0.560533	-1.34372
0.564683	-1.15551				0.564667	-1.35791
0.568817	-1.14522				0.568867	-1.36463
0.573017	-1.14924				0.573	-1.36254
0.57715	-1.16329				0.5772	-1.35277
0.58135	-1.17554				0.581333	-1.33846
0.585483	-1.18089				0.585533	-1.3256
0.589683	-1.1844				0.589667	-1.32238
0.593817	-1.18817				0.593867	-1.33238
0.598017	-1.1867				0.598	-1.34996
0.60215	-1.17804				0.6022	-1.36489
0.60635	-1.16661				0.606333	-1.36871
0.610483	-1.15207				0.610533	-1.35881
0.614683	-1.12862				0.614667	-1.34194
0.618817	-1.09593				0.618867	-1.32978
0.623017	-1.05829				0.623	-1.32711
0.62715	-1.01648				0.6272	-1.33028
0.63135	-0.97089				0.631333	-1.33496
0.635483	-0.9264				0.635533	-1.33931
0.639683	-0.88784				0.639667	-1.34249
0.643817	-0.85688				0.643867	-1.34299
0.648017	-0.834				0.648	-1.33924
0.65215	-0.81599				0.6522	-1.33371
0.65635	-0.79628				0.656333	-1.33271
0.660483	-0.77328				0.660533	-1.33752
0.664683	-0.74964				0.664667	-1.34162
0.668817	-0.72635				0.668867	-1.34102
0.673017	-0.705				0.673	-1.3389
0.67715	-0.68771				0.6772	-1.33757
0.68135	-0.67608				0.681333	-1.33408
0.685483	-0.6729				0.685533	-1.328
0.689683	-0.67793				0.689667	-1.32653
0.693817	-0.68572				0.693867	-1.33394
0.698017	-0.69097				0.698	-1.34296
0.70215	-0.6905				0.7022	-1.34528
0.70635	-0.68252				0.706333	-1.34257
0.710483	-0.66688				0.710533	-1.34086
0.714683	-0.64602				0.714667	-1.34232
0.718817	-0.62672				0.718867	-1.3456
0.723017	-0.61745				0.723	-1.34765
0.72715	-0.62137				0.7272	-1.34427
0.73135	-0.63358				0.731333	-1.33257
0.735483	-0.64556				0.735533	-1.31346
0.739683	-0.65082				0.739667	-1.29094
0.743817	-0.64813				0.743867	-1.27014
0.748017	-0.64121				0.748	-1.25569
0.75215	-0.63397				0.7522	-1.24946
0.75635	-0.62642				0.756333	-1.24954
0.760483	-0.61619				0.760533	-1.25277
0.764683	-0.60245				0.764667	-1.25687
0.768817	-0.58675				0.768867	-1.26174
0.773017	-0.57218				0.773	-1.27153
0.77715	-0.56291				0.7772	-1.29137
0.78135	-0.56268				0.781333	-1.31979
0.785483	-0.57031				0.785533	-1.3478
0.789683	-0.57754				0.789667	-1.36432
0.793817	-0.57667				0.793867	-1.36254
0.798017	-0.56899				0.798	-1.3446
0.80215	-0.56099				0.8022	-1.32099
0.80635	-0.55675				0.806333	-1.30458
0.810483	-0.55656				0.810533	-1.30281
0.814683	-0.5575				0.814667	-1.31413
0.818817	-0.55431				0.818867	-1.33294
0.823017	-0.54517				0.823	-1.35532
0.82715	-0.53374				0.8272	-1.3779
0.83135	-0.52302				0.831333	-1.39617
0.835483	-0.51532				0.835533	-1.40693
0.839683	-0.51377				0.839667	-1.41
0.843817	-0.51546				0.843867	-1.40668
0.848017	-0.51294				0.848	-1.3979
0.85215	-0.50458				0.8522	-1.38415
0.85635	-0.49591				0.856333	-1.36697
0.860483	-0.49042				0.860533	-1.34974
0.864683	-0.48382				0.864667	-1.3371
0.868817	-0.47272				0.868867	-1.33329
0.873017	-0.46146				0.873	-1.3396
0.87715	-0.45406				0.8772	-1.35305
0.88135	-0.45052				0.881333	-1.36918
0.885483	-0.4498				0.885533	-1.38459
0.889683	-0.44839				0.889667	-1.39633
0.893817	-0.44452				0.893867	-1.40284
0.898017	-0.44098				0.898	-1.40543
0.90215	-0.437				0.9022	-1.40622
0.90635	-0.42969				0.906333	-1.40543
0.910483	-0.42218				0.910533	-1.39923
0.914683	-0.41823				0.914667	-1.38188
0.918817	-0.41563				0.918867	-1.35438
0.923017	-0.40951				0.923	-1.32797
0.92715	-0.39721				0.9272	-1.31417
0.93135	-0.38146				0.931333	-1.31513
0.935483	-0.36979				0.935533	-1.32528
0.939683	-0.36611				0.939667	-1.33704
0.943817	-0.36432				0.943867	-1.34598
0.948017	-0.35577				0.948	-1.3527
0.95215	-0.34098				0.9522	-1.35691
0.95635	-0.32767				0.956333	-1.35478
0.960483	-0.32153				0.960533	-1.34647
0.964683	-0.32351				0.964667	-1.33938
0.968817	-0.32941				0.968867	-1.33957
0.973017	-0.33082				0.973	-1.3436
0.97715	-0.32183				0.9772	-1.3431
0.98135	-0.30284				0.981333	-1.33588
0.985483	-0.27642				0.985533	-1.32783
0.989683	-0.24415				0.989667	-1.32559
0.993817	-0.20842				0.993867	-1.32985
0.998017	-0.17404				0.998	-1.33619
1.00215	-0.14654				1.0022	-1.3417
1.00635	-0.13051				1.00633	-1.34786
1.01048	-0.12967				1.01053	-1.35655
1.01468	-0.14391				1.01467	-1.36417
1.01882	-0.16435				1.01887	-1.3623
1.02302	-0.17717				1.023	-1.34875
1.02715	-0.17702				1.0272	-1.33384
1.03135	-0.17542				1.03133	-1.33231
1.03548	-0.19636				1.03553	-1.35501
1.03968	-0.26899				1.03967	-1.41098
1.04382	-0.42785				1.04387	-1.51537
1.04802	-0.71519				1.048	-1.70009
1.05215	-1.17843				1.0522	-2.01737
1.05635	-1.86735				1.05633	-2.52762
1.06048	-2.83295				1.06053	-3.28546
1.06468	-4.12091				1.06467	-4.33521
1.06882	-5.76043				1.06887	-5.71013
1.07302	-7.75751				1.073	-7.43016
1.07715	-10.0967				1.0772	-9.49619
1.08135	-12.7477				1.08133	-11.8896
1.08548	-15.6721				1.08553	-14.5808
1.08968	-18.8294				1.08967	-17.5342
1.09382	-22.1808				1.09387	-20.711
1.09802	-25.6915				1.098	-24.0749
1.10215	-29.3332				1.1022	-27.5934
1.10635	-33.0853				1.10633	-31.2365
1.11048	-36.9349				1.11053	-34.9821
1.11468	-40.8713				1.11467	-38.8202
1.11882	-44.8824				1.11887	-42.7483
1.12302	-48.9591				1.123	-46.7647
1.12715	-53.106				1.1272	-50.8689
1.13135	-57.3492				1.13133	-55.0707
1.13548	-61.7357				1.13553	-59.3958
1.13968	-66.3263				1.13967	-63.8864
1.14382	-71.1903				1.14387	-68.5996
1.14802	-76.3992				1.148	-73.6038
1.15215	-82.0131				1.1522	-78.9702
1.15635	-88.0608				1.15633	-84.7525
1.16048	-94.5195				1.16053	-90.9595
1.16468	-101.298				1.16467	-97.5331
1.16882	-108.231				1.16887	-104.339
1.17302	-115.097				1.173	-111.174
1.17715	-121.653				1.1772	-117.804
1.18135	-127.677				1.18133	-124
1.18548	-133.008				1.18553	-129.573
1.18968	-137.552				1.18967	-134.395
1.19382	-141.283				1.19387	-138.408
1.19802	-144.224				1.198	-141.616
1.20215	-146.433				1.2022	-144.077
1.20635	-147.989				1.20633	-145.877
1.21048	-148.985				1.21053	-147.107
1.21468	-149.518				1.21467	-147.859
1.21882	-149.678				1.21887	-148.214
1.22302	-149.532				1.223	-148.243
1.22715	-149.126				1.2272	-148
1.23135	-148.491				1.23133	-147.527
1.23548	-147.64				1.23553	-146.854
1.23968	-146.594				1.23967	-146.002
1.24382	-145.384				1.24387	-144.993
1.24802	-144.059				1.248	-143.849
1.25215	-142.669				1.2522	-142.601
1.25635	-141.26				1.25633	-141.289
1.26048	-139.868				1.26053	-139.952
1.26468	-138.514				1.26467	-138.62
1.26882	-137.197				1.26887	-137.316
1.27302	-135.897				1.273	-136.041
1.27715	-134.58				1.2772	-134.777
1.28135	-133.198				1.28133	-133.488
1.28548	-131.699				1.28553	-132.131
1.28968	-130.04				1.28967	-130.659
1.29382	-128.201				1.29387	-129.031
1.29802	-126.175				1.298	-127.215
1.30215	-123.965				1.3022	-125.201
1.30635	-121.578				1.30633	-122.996
1.31048	-119.03				1.31053	-120.615
1.31468	-116.339				1.31467	-118.078
1.31882	-113.522				1.31887	-115.403
1.32302	-110.599				1.323	-112.607
1.32715	-107.585				1.3272	-109.701
1.33135	-104.496				1.33133	-106.696
1.33548	-101.352				1.33553	-103.611
1.33968	-98.1719				1.33967	-100.464
1.34382	-94.9702				1.34387	-97.2707
1.34802	-91.7526				1.348	-94.0474
1.35215	-88.5203				1.3522	-90.808
1.35635	-85.2765				1.35633	-87.5647
1.36048	-82.0315				1.36053	-84.3269
1.36468	-78.8014				1.36467	-81.1022
1.36882	-75.6021				1.36887	-77.8997
1.37302	-72.4448				1.373	-74.7329
1.37715	-69.3356				1.3772	-71.6198
1.38135	-66.2783				1.38133	-68.577
1.38548	-63.2771				1.38553	-65.6152
1.38968	-60.3359				1.38967	-62.739
1.39382	-57.4487				1.39387	-59.949
1.39802	-54.5883				1.398	-57.2472
1.40215	-51.7095				1.4022	-54.6374
1.40635	-48.7593				1.40633	-52.116
1.41048	-45.666				1.41053	-49.6601
1.41468	-42.277				1.41467	-47.2287
1.41882	-38.2453				1.41887	-44.7699
1.42302	-32.9001				1.423	-42.2248
1.42715	-25.2085				1.4272	-39.5167
1.43135	-13.9689				1.43133	-36.5224
1.43548	1.75468				1.43553	-33.0032
1.43968	22.1493				1.43967	-28.4813
1.44382	46.3954				1.44387	-22.1247
1.44802	72.7813				1.448	-12.8052
1.45215	99.1359				1.4522	0.57747
1.45635	123.394				1.45633	18.6188
1.46048	144.072				1.46053	41.0271
1.46468	160.499				1.46467	66.5405
1.46882	172.762				1.46887	93.1874
1.47302	181.466				1.473	118.792
1.47715	187.43				1.4772	141.525
1.48135	191.458				1.48133	160.279
1.48548	194.209				1.48553	174.752
1.48968	196.156				1.48967	185.301
1.49382	197.596				1.49387	192.667
1.49802	198.685				1.498	197.694
1.50215	199.489				1.5022	201.128
1.50635	200.018				1.50633	203.533
1.51048	200.232				1.51053	205.275
1.51468	200.045				1.51467	206.552
1.51882	199.302				1.51887	207.431
1.52302	197.777				1.523	207.881
1.52715	195.196				1.5272	207.781
1.53135	191.291				1.53133	206.926
1.53548	185.87				1.53553	205.055
1.53968	178.874				1.53967	201.893
1.54382	170.407				1.54387	197.222
1.54802	160.759				1.548	190.958
1.55215	150.379				1.5522	183.19
1.55635	139.812				1.55633	174.183
1.56048	129.593				1.56053	164.356
1.56468	120.144				1.56467	154.212
1.56882	111.726				1.56887	144.24
1.57302	104.428				1.573	134.827
1.57715	98.1658				1.5772	126.189
1.58135	92.7156				1.58133	118.36
1.58548	87.783				1.58553	111.227
1.58968	83.0794				1.58967	104.589
1.59382	78.3775				1.59387	98.2136
1.59802	73.5294				1.598	91.8863
1.60215	68.4669				1.6022	85.4549
1.60635	63.2				1.60633	78.865
1.61048	57.8012				1.61053	72.1661
1.61468	52.3685				1.61467	65.4806
1.61882	46.9726				1.61887	58.9463
1.62302	41.5985				1.623	52.6696
1.62715	36.1086				1.6272	46.6966
1.63135	30.243				1.63133	40.9914
1.63548	23.65				1.63553	35.4226
1.63968	15.9528				1.63967	29.7657
1.64382	6.84795				1.64387	23.723
1.64802	-3.79453				1.648	16.9479
1.65215	-15.8774				1.6522	9.0845
1.65635	-29.086				1.65633	-0.16371
1.66048	-42.9464				1.66053	-10.948
1.66468	-56.9067				1.66467	-23.208
1.66882	-70.4232				1.66887	-36.6523
1.67302	-83.0342				1.673	-50.7957
1.67715	-94.4089				1.6772	-65.0408
1.68135	-104.368				1.68133	-78.7802
1.68548	-112.87				1.68553	-91.4973
1.68968	-119.978				1.68967	-102.84
1.69382	-125.819				1.69387	-112.638
1.69802	-130.556				1.698	-120.877
1.70215	-134.359				1.7022	-127.651
1.70635	-137.4				1.70633	-133.123
1.71048	-139.844				1.71053	-137.485
1.71468	-141.843				1.71467	-140.931
1.71882	-143.53				1.71887	-143.633
1.72302	-145.001				1.723	-145.747
1.72715	-146.32				1.7272	-147.408
1.73135	-147.53				1.73133	-148.733
1.73548	-148.659				1.73553	-149.812
1.73968	-149.723				1.73967	-150.712
1.74382	-150.726				1.74387	-151.483
1.74802	-151.666				1.748	-152.162
1.75215	-152.532				1.7522	-152.775
1.75635	-153.308				1.75633	-153.34
1.76048	-153.979				1.76053	-153.863
1.76468	-154.54				1.76467	-154.34
1.76882	-154.984				1.76887	-154.759
1.77302	-155.307				1.773	-155.105
1.77715	-155.497				1.7772	-155.367
1.78135	-155.538				1.78133	-155.537
1.78548	-155.414				1.78553	-155.608
1.78968	-155.11				1.78967	-155.572
1.79382	-154.618				1.79387	-155.422
1.79802	-153.935				1.798	-155.148
1.80215	-153.057				1.8022	-154.74
1.80635	-151.976				1.80633	-154.192
1.81048	-150.682				1.81053	-153.496
1.81468	-149.166				1.81467	-152.641
1.81882	-147.425				1.81887	-151.613
1.82302	-145.462				1.823	-150.397
1.82715	-143.288				1.8272	-148.992
1.83135	-140.912				1.83133	-147.397
1.83548	-138.34				1.83553	-145.612
1.83968	-135.573				1.83967	-143.633
1.84382	-132.621				1.84387	-141.459
1.84802	-129.5				1.848	-139.093
1.85215	-126.234				1.8522	-136.543
1.85635	-122.84				1.85633	-133.815
1.86048	-119.331				1.86053	-130.918
1.86468	-115.72				1.86467	-127.864
1.86882	-112.019				1.86887	-124.663
1.87302	-108.239				1.873	-121.323
1.87715	-104.393				1.8772	-117.854
1.88135	-100.488				1.88133	-114.276
1.88548	-96.534				1.88553	-110.608
1.88968	-92.5497				1.88967	-106.869
1.89382	-88.5581				1.89387	-103.075
1.89802	-84.5734				1.898	-99.2306
1.90215	-80.6008				1.9022	-95.3419
1.90635	-76.6489				1.90633	-91.4185
1.91048	-72.7335				1.91053	-87.4741
1.91468	-68.8689				1.91467	-83.5228
1.91882	-65.0648				1.91887	-79.578
1.92302	-61.3318				1.923	-75.6517
1.92715	-57.6865				1.9272	-71.7546
1.93135	-54.1472				1.93133	-67.8992
1.93548	-50.7236				1.93553	-64.1025
1.93968	-47.4159				1.93967	-60.3838
1.94382	-44.2263				1.94387	-56.7575
1.94802	-41.1659				1.948	-53.23
1.95215	-38.2451				1.9522	-49.8059
1.95635	-35.468				1.95633	-46.492
1.96048	-32.8363				1.96053	-43.2961
1.96468	-30.3522				1.96467	-40.2248
1.96882	-28.0159				1.96887	-37.2848
1.97302	-25.8194				1.973	-34.4825
1.97715	-23.7494				1.9772	-31.8226
1.98135	-21.7985				1.98133	-29.3079
1.98548	-19.9686				1.98553	-26.9377
1.98968	-18.2611				1.98967	-24.7078
1.99382	-16.669				1.99387	-22.6132
1.99802	-15.1809				1.998	-20.6536
2.00215	-13.7898				2.0022	-18.8323
2.00635	-12.4947				2.00633	-17.1478
2.01048	-11.2937				2.01053	-15.5891
2.01468	-10.1837				2.01467	-14.1411
2.01882	-9.16437				2.01887	-12.7915
2.02302	-8.23633				2.023	-11.5322
2.02715	-7.39442				2.0272	-10.3613
2.03135	-6.6308				2.03133	-9.27982
2.03548	-5.94312				2.03553	-8.28829
2.03968	-5.33352				2.03967	-7.38549
2.04382	-4.799				2.04387	-6.56849
2.04802	-4.3279				2.048	-5.83273
2.05215	-3.90952				2.0522	-5.17392
2.05635	-3.54321				2.05633	-4.58851
2.06048	-3.23317				2.06053	-4.07289
2.06468	-2.97685				2.06467	-3.62429
2.06882	-2.7642				2.06887	-3.24006
2.07302	-2.5882				2.073	-2.9142
2.07715	-2.44841				2.0772	-2.63736
2.08135	-2.34101				2.08133	-2.40162
2.08548	-2.25511				2.08553	-2.20222
2.08968	-2.18243				2.08967	-2.03487
2.09382	-2.12147				2.09387	-1.89563
2.09802	-2.07196				2.098	-1.7827
2.10215	-2.03177				2.1022	-1.69317
2.10635	-2.00023				2.10633	-1.6204
2.11048	-1.97978				2.11053	-1.5576
2.11468	-1.96923				2.11467	-1.50207
2.11882	-1.96196				2.11887	-1.4555
2.12302	-1.9559				2.123	-1.42037
2.12715	-1.95682				2.1272	-1.39548
2.13135	-1.96825				2.13133	-1.37588
2.13548	-1.98333				2.13553	-1.35741
2.13968	-1.9909				2.13967	-1.34104
2.14382	-1.98743				2.14387	-1.3316
2.14802	-1.97678				2.148	-1.33167
2.15215	-1.96459				2.1522	-1.3389
2.15635	-1.95696				2.15633	-1.34841
2.16048	-1.95511				2.16053	-1.35459
2.16468	-1.9533				2.16467	-1.35276
2.16882	-1.94645				2.16887	-1.34338
2.17302	-1.93393				2.173	-1.33346
2.17715	-1.91792				2.1772	-1.32985
2.18135	-1.90202				2.18133	-1.33162
2.18548	-1.88818				2.18553	-1.33132
2.18968	-1.87519				2.18967	-1.32313
2.19382	-1.86099				2.19387	-1.30788
2.19802	-1.84433				2.198	-1.29112
2.20215	-1.82588				2.2022	-1.27743
2.20635	-1.80896				2.20633	-1.26736
2.21048	-1.79696				2.21053	-1.25908
2.21468	-1.79105				2.21467	-1.25077
2.21882	-1.79113				2.21887	-1.24163
2.22302	-1.79437				2.223	-1.23096
2.22715	-1.79567				2.2272	-1.21771
2.23135	-1.7926				2.23133	-1.20253
2.23548	-1.7859				2.23553	-1.18819
2.23968	-1.77731				2.23967	-1.17745
2.24382	-1.76966				2.24387	-1.17257
2.24802	-1.76482				2.248	-1.17607
2.25215	-1.76156				2.2522	-1.18993
2.25635	-1.75718				2.25633	-1.21342
2.26048	-1.75128				2.26053	-1.24106
2.26468	-1.74694				2.26467	-1.26445
2.26882	-1.74461				2.26887	-1.27769
2.27302	-1.73915				2.273	-1.28149
2.27715	-1.72661				2.2772	-1.28261
2.28135	-1.70958				2.28133	-1.28973
2.28548	-1.69431				2.28553	-1.30906
2.28968	-1.68362				2.28967	-1.34215
2.29382	-1.67342				2.29387	-1.38446
2.29802	-1.65646				2.298	-1.42595
2.30215	-1.62904				2.3022	-1.45712
2.30635	-1.59505				2.30633	-1.47618
2.31048	-1.55951				2.31053	-1.48947
2.31468	-1.52227				2.31467	-1.5058
2.31882	-1.48338				2.31887	-1.53004
2.32302	-1.44303				2.323	-1.56046
2.32715	-1.39635				2.3272	-1.59269
2.33135	-1.33983				2.33133	-1.62484
2.33548	-1.27798				2.33553	-1.65634
2.33968	-1.2159				2.33967	-1.68397
2.34382	-1.15202				2.34387	-1.70326
2.34802	-1.08443				2.348	-1.71264
2.35215	-1.0178				2.3522	-1.71693
2.35635	-0.95793				2.35633	-1.72755
2.36048	-0.90218				2.36053	-1.7551
2.36468	-0.84137				2.36467	-1.79983
2.36882	-0.77114				2.36887	-1.84995
2.37302	-0.69494				2.373	-1.88903
2.37715	-0.61855				2.3772	-1.90826
2.38135	-0.54871				2.38133	-1.91384
2.38548	-0.49236				2.38553	-1.92193
2.38968	-0.45017				2.38967	-1.94731
2.39382	-0.41573				2.39387	-1.99305
2.39802	-0.38437				2.398	-2.04711
2.40215	-0.35453				2.4022	-2.09247
2.40635	-0.32412				2.40633	-2.12181
2.41048	-0.29336				2.41053	-2.14019
2.41468	-0.26522				2.41467	-2.15659
2.41882	-0.24203				2.41887	-2.17708
2.42302	-0.22617				2.423	-2.20298
2.42715	-0.2208				2.4272	-2.23196
2.43135	-0.22533				2.43133	-2.25966
2.43548	-0.2314				2.43553	-2.2807
2.43968	-0.22384				2.43967	-2.29277
2.44382	-0.18047				2.44387	-2.30223
2.44802	-0.07465				2.448	-2.32096
2.45215	0.10994				2.4522	-2.35547
2.45635	0.36557				2.45633	-2.40132
2.46048	0.66546				2.46053	-2.44807
2.46468	0.97488				2.46467	-2.48769
2.46882	1.25511				2.46887	-2.51821
2.47302	1.47411				2.473	-2.53984
2.47715	1.62204				2.4772	-2.55149
2.48135	1.71047				2.48133	-2.55523
2.48548	1.75874				2.48553	-2.55914
2.48968	1.7863				2.48967	-2.56973
2.49382	1.81217				2.49387	-2.58544
2.49802	1.85091				2.498	-2.59968
2.50215	1.90695				2.5022	-2.60574
2.50635	1.97507				2.50633	-2.60112
2.51048	2.04545				2.51053	-2.59121
2.51468	2.11054				2.51467	-2.58559
2.51882	2.16953				2.51887	-2.58933
2.52302	2.22441				2.523	-2.59979
2.52715	2.27165				2.5272	-2.61074
2.53135	2.30101				2.53133	-2.61779
2.53548	2.3063				2.53553	-2.61954
2.53968	2.29157				2.53967	-2.61595
2.54382	2.26158				2.54387	-2.60834
2.54802	2.21474				2.548	-2.59986
2.55215	2.14735				2.5522	-2.59514
2.55635	2.05845				2.55633	-2.59788
2.56048	1.9526				2.56053	-2.60694
2.56468	1.84132				2.56467	-2.61679
2.56882	1.73644				2.56887	-2.622
2.57302	1.63917				2.573	-2.6206
2.57715	1.5425				2.5772	-2.61574
2.58135	1.44207				2.58133	-2.61341
2.58548	1.33691				2.58553	-2.61564
2.58968	1.2259				2.58967	-2.61735
2.59382	1.11055				2.59387	-2.60886
2.59802	0.99494				2.598	-2.58034
2.60215	0.87925				2.6022	-2.52536
2.60635	0.76085				2.60633	-2.4403
2.61048	0.639				2.61053	-2.32256
2.61468	0.51149				2.61467	-2.17147
2.61882	0.37092				2.61887	-1.99124
2.62302	0.20767				2.623	-1.79337
2.62715	0.0176				2.6272	-1.59437
2.63135	-0.19444				2.63133	-1.40893
2.63548	-0.41986				2.63553	-1.24334
2.63968	-0.64987				2.63967	-1.09575
2.64382	-0.87526				2.64387	-0.96547
2.64802	-1.09168				2.648	-0.85776
2.65215	-1.30257				2.6522	-0.77476
2.65635	-1.50931				2.65633	-0.70871
2.66048	-1.70401				2.66053	-0.65141
2.66468	-1.87732				2.66467	-0.60383
2.66882	-2.02724				2.66887	-0.5697
2.67302	-2.15903				2.673	-0.54691
2.67715	-2.27727				2.6772	-0.53056
2.68135	-2.38002				2.68133	-0.51716
2.68548	-2.46421				2.68553	-0.50188
2.68968	-2.53179				2.68967	-0.47952
2.69382	-2.58752				2.69387	-0.44952
2.69802	-2.6347				2.698	-0.41562
2.70215	-2.67506				2.7022	-0.38327
2.70635	-2.7104				2.70633	-0.3589
2.71048	-2.74187				2.71053	-0.3471
2.71468	-2.76871				2.71467	-0.34827
2.71882	-2.78892				2.71887	-0.35939
2.72302	-2.80081				2.723	-0.37539
2.72715	-2.80473				2.7272	-0.39041
2.73135	-2.80288				2.73133	-0.39778
2.73548	-2.79731				2.73553	-0.39159
2.73968	-2.78993				2.73967	-0.37154
2.74382	-2.78307				2.74387	-0.34463
2.74802	-2.77689				2.748	-0.32112
2.75215	-2.7672				2.7522	-0.30875
2.75635	-2.74807				2.75633	-0.31002
2.76048	-2.71609				2.76053	-0.32453
2.76468	-2.67254				2.76467	-0.35051
2.76882	-2.622				2.76887	-0.38483
2.77302	-2.56996				2.773	-0.42253
2.77715	-2.52089				2.7772	-0.45573
2.78135	-2.47759				2.78133	-0.4772
2.78548	-2.44208				2.78553	-0.48818
2.78968	-2.4142				2.78967	-0.49739
2.79382	-2.39018				2.79387	-0.51151
2.79802	-2.36421				2.798	-0.53156
2.80215	-2.33129				2.8022	-0.55785
2.80635	-2.28979				2.80633	-0.59005
2.81048	-2.24194				2.81053	-0.6217
2.81468	-2.19399				2.81467	-0.64489
2.81882	-2.15293				2.81887	-0.66076
2.82302	-2.118				2.823	-0.67657
2.82715	-2.08232				2.8272	-0.69506
2.83135	-2.04418				2.83133	-0.71204
2.83548	-2.00902				2.83553	-0.72333
2.83968	-1.98088				2.83967	-0.73226
2.84382	-1.95731				2.84387	-0.74772
2.84802	-1.93457				2.848	-0.77288
2.85215	-1.91192				2.8522	-0.79853
2.85635	-1.88875				2.85633	-0.81218
2.86048	-1.8633				2.86053	-0.81171
2.86468	-1.83387				2.86467	-0.80551
2.86882	-1.80027				2.86887	-0.80158
2.87302	-1.76648				2.873	-0.80172
2.87715	-1.73975				2.8772	-0.80625
2.88135	-1.72249				2.88133	-0.81816
2.88548	-1.70703				2.88553	-0.83954
2.88968	-1.68574				2.88967	-0.86808
2.89382	-1.66097				2.89387	-0.89707
2.89802	-1.6378				2.898	-0.91756
2.90215	-1.6161				2.9022	-0.9254
2.90635	-1.59261				2.90633	-0.92601
2.91048	-1.56549				2.91053	-0.92985
2.91468	-1.53712				2.91467	-0.94324
2.91882	-1.51226				2.91887	-0.96388
2.92302	-1.49355				2.923	-0.98615
2.92715	-1.47948				2.9272	-1.00916
2.93135	-1.46565				2.93133	-1.03453
2.93548	-1.44877				2.93553	-1.05773
2.93968	-1.43008				2.93967	-1.07091
2.94382	-1.41201				2.94387	-1.07419
2.94802	-1.39279				2.948	-1.07539
2.95215	-1.36861				2.9522	-1.0808
2.95635	-1.3395				2.95633	-1.09247
2.96048	-1.31054				2.96053	-1.10831
2.96468	-1.28885				2.96467	-1.1218
2.96882	-1.27873				2.96887	-1.1282
2.97302	-1.27653				2.973	-1.1305
2.97715	-1.27108				2.9772	-1.13693
2.98135	-1.25375				2.98133	-1.15316
2.98548	-1.22677				2.98553	-1.17404
2.98968	-1.19922				2.98967	-1.18624
2.99382	-1.17802				2.99387	-1.18337
2.99802	-1.16295				2.998	-1.17286
3.00215	-1.15063				3.0022	-1.16784
3.00635	-1.14137				3.00633	-1.17635
3.01048	-1.13555				3.01053	-1.19426
3.01468	-1.12814				3.01467	-1.20846
3.01882	-1.11545				3.01887	-1.21161
3.02302	-1.10122				3.023	-1.20961
3.02715	-1.09175				3.0272	-1.2128
3.03135	-1.08903				3.03133	-1.22497
3.03548	-1.08945				3.03553	-1.2408
3.03968	-1.08649				3.03967	-1.24938
3.04382	-1.07472				3.04387	-1.24276
3.04802	-1.05397				3.048	-1.22446
3.05215	-1.03033				3.0522	-1.2067
3.05635	-1.01133				3.05633	-1.20008
3.06048	-1.00056				3.06053	-1.20748
3.06468	-0.99661				3.06467	-1.22143
3.06882	-0.99494				3.06887	-1.22853
3.07302	-0.99052				3.073	-1.22353
3.07715	-0.97928				3.0772	-1.21418
3.08135	-0.95975				3.08133	-1.20979
3.08548	-0.93509				3.08553	-1.21268
3.08968	-0.91217				3.08967	-1.21974
3.09382	-0.89773				3.09387	-1.22613
3.09802	-0.89496				3.098	-1.22912
3.10215	-0.90258				3.1022	-1.23077
3.10635	-0.91541				3.10633	-1.2348
3.11048	-0.9248				3.11053	-1.24098
3.11468	-0.92227				3.11467	-1.24544
3.11882	-0.90701				3.11887	-1.24523
3.12302	-0.88688				3.123	-1.23955
3.12715	-0.87131				3.1272	-1.23154
3.13135	-0.86502				3.13133	-1.2287
3.13548	-0.86566				3.13553	-1.2337
3.13968	-0.86596				3.13967	-1.23978
3.14382	-0.86076				3.14387	-1.24232
3.14802	-0.85011				3.148	-1.24577
3.15215	-0.83626				3.1522	-1.25275
3.15635	-0.82225				3.15633	-1.25753
3.16048	-0.81129				3.16053	-1.25631
3.16468	-0.80514				3.16467	-1.25386
3.16882	-0.80339				3.16887	-1.25618
3.17302	-0.80427				3.173	-1.26324
3.17715	-0.80582				3.1772	-1.26919
3.18135	-0.80632				3.18133	-1.26922
3.18548	-0.80419				3.18553	-1.26499
3.18968	-0.79948				3.18967	-1.25982
3.19382	-0.79562				3.19387	-1.25298
3.19802	-0.79677				3.198	-1.24319
3.20215	-0.80269				3.2022	-1.23457
3.20635	-0.80931				3.20633	-1.23484
3.21048	-0.81323				3.21053	-1.24541
3.21468	-0.81364				3.21467	-1.25807
3.21882	-0.81313				3.21887	-1.26511
3.22302	-0.81572				3.223	-1.26575
3.22715	-0.82086				3.2272	-1.26143
3.23135	-0.8234				3.23133	-1.25416
3.23548	-0.81981				3.23553	-1.2494
3.23968	-0.8104				3.23967	-1.25153
3.24382	-0.79841				3.24387	-1.25685
3.24802	-0.78887				3.248	-1.25893
3.25215	-0.78462				3.2522	-1.25809
3.25635	-0.78263				3.25633	-1.25844
3.26048	-0.77851				3.26053	-1.25926
3.26468	-0.77479				3.26467	-1.25717
3.26882	-0.77758				3.26887	-1.25429
3.27302	-0.78561				3.273	-1.25674
3.27715	-0.79022				3.2772	-1.26604
3.28135	-0.78657				3.28133	-1.27614
3.28548	-0.78049				3.28553	-1.2792
3.28968	-0.78107				3.28967	-1.27407
3.29382	-0.78819				3.29387	-1.2675
3.29802	-0.79333				3.298	-1.26725
3.30215	-0.79095				3.3022	-1.27399
3.30635	-0.78455				3.30633	-1.27968
3.31048	-0.78175				3.31053	-1.27722
3.31468	-0.78557				3.31467	-1.27052
3.31882	-0.79364				3.31887	-1.27013
3.32302	-0.80375				3.323	-1.27908
3.32715	-0.81395				3.3272	-1.28947
3.33135	-0.81892				3.33133	-1.29335
3.33548	-0.81494				3.33553	-1.28893
3.33968	-0.80568				3.33967	-1.27872
3.34382	-0.7967				3.34387	-1.26775
3.34802	-0.78993				3.348	-1.25945
3.35215	-0.78505				3.3522	-1.25328
3.35635	-0.7809				3.35633	-1.24913
3.36048	-0.77664				3.36053	-1.24919
3.36468	-0.77463				3.36467	-1.25304
3.36882	-0.78052				3.36887	-1.2573
3.37302	-0.7983				3.373	-1.26077
3.37715	-0.8234				3.3772	-1.26382
3.38135	-0.84269				3.38133	-1.26648
3.38548	-0.84563				3.38553	-1.27004
3.38968	-0.83401				3.38967	-1.27377
3.39382	-0.81838				3.39387	-1.27271
3.39802	-0.80749				3.398	-1.26458
3.40215	-0.80307				3.4022	-1.25432
3.40635	-0.80226				3.40633	-1.24933
3.41048	-0.8016				3.41053	-1.25206
3.41468	-0.80001				3.41467	-1.25939
3.41882	-0.7997				3.41887	-1.26712
3.42302	-0.80264				3.423	-1.27234
3.42715	-0.80628				3.4272	-1.27447
3.43135	-0.80442				3.43133	-1.27511
3.43548	-0.79447				3.43553	-1.27578
3.43968	-0.78225				3.43967	-1.27617
3.44382	-0.77674				3.44387	-1.27529
3.44802	-0.78058				3.448	-1.27421
3.45215	-0.78665				3.4522	-1.27706
3.45635	-0.78551				3.45633	-1.28716
3.46048	-0.77532				3.46053	-1.30237
3.46468	-0.76207				3.46467	-1.31556
3.46882	-0.75302				3.46887	-1.31962
3.47302	-0.75261				3.473	-1.31398
3.47715	-0.76155				3.4772	-1.30625
3.48135	-0.77635				3.48133	-1.30292
3.48548	-0.7912				3.48553	-1.30386
3.48968	-0.80161				3.48967	-1.30768
3.49382	-0.80476				3.49387	-1.3127
3.49802	-0.7972				3.498	-1.31482
3.50215	-0.77829				3.5022	-1.31143
3.50635	-0.75454				3.50633	-1.30527
3.51048	-0.735				3.51053	-1.30211
3.51468	-0.72363				3.51467	-1.30379
3.51882	-0.71836				3.51887	-1.30637
3.52302	-0.7179				3.523	-1.30657
3.52715	-0.72323				3.5272	-1.30504
3.53135	-0.73026				3.53133	-1.30296
3.53548	-0.73182				3.53553	-1.29995
3.53968	-0.72786				3.53967	-1.29701
3.54382	-0.72554				3.54387	-1.29746
3.54802	-0.7302				3.548	-1.30168
3.55215	-0.73862				3.5522	-1.30642
3.55635	-0.74306				3.55633	-1.31068
3.56048	-0.74288				3.56053	-1.31583
3.56468	-0.7446				3.56467	-1.32045
3.56882	-0.74931				3.56887	-1.32169
3.57302	-0.75186				3.573	-1.32137
3.57715	-0.75064				3.5772	-1.32264
3.58135	-0.74736				3.58133	-1.32455
3.58548	-0.74219				3.58553	-1.32596
3.58968	-0.73698				3.58967	-1.3264
3.59382	-0.73608				3.59387	-1.32413
3.59802	-0.73935				3.598	-1.31869
3.60215	-0.74213				3.6022	-1.31091
3.60635	-0.74313				3.60633	-1.30324
3.61048	-0.74673				3.61053	-1.30161
3.61468	-0.756				3.61467	-1.30833
3.61882	-0.76761				3.61887	-1.31601
3.62302	-0.77806				3.623	-1.3155
3.62715	-0.78723				3.6272	-1.3069
3.63135	-0.79172				3.63133	-1.29902
3.63548	-0.7871				3.63553	-1.29864
3.63968	-0.77711				3.63967	-1.30367
3.64382	-0.77096				3.64387	-1.30885
3.64802	-0.77463				3.648	-1.31278
3.65215	-0.78719				3.6522	-1.3152
3.65635	-0.80201				3.65633	-1.31515
3.66048	-0.81369				3.66053	-1.31433
3.66468	-0.8219				3.66467	-1.31428
3.66882	-0.82619				3.66887	-1.31372
3.67302	-0.82559				3.673	-1.31287
3.67715	-0.82203				3.6772	-1.31336
3.68135	-0.8172				3.68133	-1.3158
3.68548	-0.81249				3.68553	-1.32029
3.68968	-0.81076				3.68967	-1.32383
3.69382	-0.81252				3.69387	-1.32151
3.69802	-0.81467				3.698	-1.31361
3.70215	-0.81386				3.7022	-1.3048
3.70635	-0.8092				3.70633	-1.29911
3.71048	-0.80198				3.71053	-1.29895
3.71468	-0.79389				3.71467	-1.30254
3.71882	-0.7874				3.71887	-1.30393
3.72302	-0.78611				3.723	-1.30006
3.72715	-0.79127				3.7272	-1.29441
3.73135	-0.79982				3.73133	-1.29332
3.73548	-0.80688				3.73553	-1.30096
3.73968	-0.80774				3.73967	-1.31708
3.74382	-0.79981				3.74387	-1.33635
3.74802	-0.78506				3.748	-1.35071
3.75215	-0.76869				3.7522	-1.35576
3.75635	-0.75557				3.75633	-1.35186
3.76048	-0.7491				3.76053	-1.34173
3.76468	-0.75004				3.76467	-1.33106
3.76882	-0.75473				3.76887	-1.32416
3.77302	-0.75834				3.773	-1.31933
3.77715	-0.75952				3.7772	-1.31373
3.78135	-0.75803				3.78133	-1.30902
3.78548	-0.75236				3.78553	-1.30947
3.78968	-0.7435				3.78967	-1.31697
3.79382	-0.73617				3.79387	-1.32893
3.79802	-0.73461				3.798	-1.33907
3.80215	-0.73998				3.8022	-1.34155
3.80635	-0.74895				3.80633	-1.33687
3.81048	-0.75279				3.81053	-1.33056
3.81468	-0.74427				3.81467	-1.32606
3.81882	-0.72738				3.81887	-1.32406
3.82302	-0.71517				3.823	-1.32575
3.82715	-0.71594				3.8272	-1.32954
3.83135	-0.72487				3.83133	-1.3301
3.83548	-0.73232				3.83553	-1.32625
3.83968	-0.73366				3.83967	-1.32151
3.84382	-0.72843				3.84387	-1.31772
3.84802	-0.71961				3.848	-1.31571
3.85215	-0.71238				3.8522	-1.31695
3.85635	-0.70737				3.85633	-1.32145
3.86048	-0.70164				3.86053	-1.32574
3.86468	-0.69581				3.86467	-1.32488
3.86882	-0.69231				3.86887	-1.31763
3.87302	-0.68985				3.873	-1.30734
3.87715	-0.6859				3.8772	-1.29846
3.88135	-0.68317				3.88133	-1.29373
3.88548	-0.68656				3.88553	-1.29317
3.88968	-0.69332				3.88967	-1.29484
3.89382	-0.69585				3.89387	-1.296
3.89802	-0.69208				3.898	-1.29502
3.90215	-0.68599				3.9022	-1.29285
3.90635	-0.68317				3.90633	-1.2927
3.91048	-0.68688				3.91053	-1.29805
3.91468	-0.6936				3.91467	-1.30841
3.91882	-0.6958				3.91887	-1.31773
3.92302	-0.69215				3.923	-1.31995
3.92715	-0.68921				3.9272	-1.31446
3.93135	-0.69094				3.93133	-1.30565
3.93548	-0.69316				3.93553	-1.29868
3.93968	-0.69085				3.93967	-1.29478
3.94382	-0.68609				3.94387	-1.2922
3.94802	-0.68384				3.948	-1.29209
3.95215	-0.6824				3.9522	-1.29702
3.95635	-0.67691				3.95633	-1.30553
3.96048	-0.66801				3.96053	-1.3131
3.96468	-0.6592				3.96467	-1.31493
3.96882	-0.65329				3.96887	-1.30841
3.97302	-0.65258				3.973	-1.29495
3.97715	-0.65564				3.9772	-1.27752
3.98135	-0.6578				3.98133	-1.25857
3.98548	-0.65566				3.98553	-1.2415
3.98968	-0.6488				3.98967	-1.23139
3.99382	-0.64105				3.99387	-1.23067
3.99802	-0.63799				3.998	-1.23521
4.00215	-0.63985				4.0022	-1.23779
4.00635	-0.64202				4.00633	-1.23394
4.01048	-0.64124				4.01053	-1.22234
4.01468	-0.63632				4.01467	-1.20322
4.01882	-0.62743				4.01887	-1.1809
4.02302	-0.61855				4.023	-1.16417
4.02715	-0.61355				4.0272	-1.1592
4.03135	-0.6088				4.03133	-1.16355
4.03548	-0.59926				4.03553	-1.16966
4.03968	-0.58727				4.03967	-1.17238
4.04382	-0.57638				4.04387	-1.17058
4.04802	-0.56618				4.048	-1.16307
4.05215	-0.55488				4.0522	-1.14736
4.05635	-0.53969				4.05633	-1.12464
4.06048	-0.52039				4.06053	-1.102
4.06468	-0.50314				4.06467	-1.08375
4.06882	-0.49377				4.06887	-1.06649
4.07302	-0.4907				4.073	-1.04684
4.07715	-0.48788				4.0772	-1.02629
4.08135	-0.48214				4.08133	-1.00758
4.08548	-0.47529				4.08553	-0.99167
4.08968	-0.46903				4.08967	-0.97788
4.09382	-0.46357				4.09387	-0.96636
4.09802	-0.45984				4.098	-0.95879
4.10215	-0.45637				4.1022	-0.9535
4.10635	-0.44958				4.10633	-0.94523
4.11048	-0.43952				4.11053	-0.93343
4.11468	-0.42977				4.11467	-0.92222
4.11882	-0.42261				4.11887	-0.9113
4.12302	-0.4175				4.123	-0.89549
4.12715	-0.41481				4.1272	-0.87392
4.13135	-0.41658				4.13133	-0.85365
4.13548	-0.42058				4.13553	-0.84104
4.13968	-0.42022				4.13967	-0.83393
4.14382	-0.41218				4.14387	-0.82565
4.14802	-0.40166				4.148	-0.81285
4.15215	-0.39695				4.1522	-0.79715
4.15635	-0.39843				4.15633	-0.78089
4.16048	-0.39967				4.16053	-0.76545
4.16468	-0.39646				4.16467	-0.75294
4.16882	-0.38794				4.16887	-0.74528
4.17302	-0.37681				4.173	-0.74219
4.17715	-0.36918				4.1772	-0.73961
4.18135	-0.36779				4.18133	-0.73222
4.18548	-0.36897				4.18553	-0.71915
4.18968	-0.36943				4.18967	-0.7024
4.19382	-0.37241				4.19387	-0.68383
4.19802	-0.38206				4.198	-0.66764
4.20215	-0.39511				4.2022	-0.65979
4.20635	-0.4067				4.20633	-0.66334
4.21048	-0.41755				4.21053	-0.67416
4.21468	-0.4286				4.21467	-0.68358
4.21882	-0.43841				4.21887	-0.68703
4.22302	-0.44799				4.223	-0.68416
4.22715	-0.4592				4.2272	-0.67617
4.23135	-0.46977				4.23133	-0.66962
4.23548	-0.47561				4.23553	-0.67069
4.23968	-0.47574				4.23967	-0.67541
4.24382	-0.47385				4.24387	-0.67576
4.24802	-0.4758				4.248	-0.67014
4.25215	-0.48453				4.2522	-0.66241
4.25635	-0.49792				4.25633	-0.65586
4.26048	-0.51196				4.26053	-0.65163
4.26468	-0.52551				4.26467	-0.64938
4.26882	-0.54173				4.26887	-0.64934
4.27302	-0.56283				4.273	-0.65462
4.27715	-0.58398				4.2772	-0.66652
4.28135	-0.59834				4.28133	-0.67926
4.28548	-0.60616				4.28553	-0.68517
4.28968	-0.61374				4.28967	-0.68342
4.29382	-0.6263				4.29387	-0.6811
4.29802	-0.64422				4.298	-0.6858
4.30215	-0.66404				4.3022	-0.69762
4.30635	-0.68254				4.30633	-0.7096
4.31048	-0.69954				4.31053	-0.71546
4.31468	-0.71577				4.31467	-0.71486
4.31882	-0.72983				4.31887	-0.71232
4.32302	-0.73945				4.323	-0.71395
4.32715	-0.74685				4.3272	-0.72394
4.33135	-0.75846				4.33133	-0.74021
4.33548	-0.77587				4.33553	-0.7549
4.33968	-0.79353				4.33967	-0.76261
4.34382	-0.80649				4.34387	-0.76684
4.34802	-0.81566				4.348	-0.77368
4.35215	-0.82548				4.3522	-0.78263
4.35635	-0.83826				4.35633	-0.78844
4.36048	-0.85221				4.36053	-0.78957
4.36468	-0.86468				4.36467	-0.78991
4.36882	-0.87661				4.36887	-0.79234
4.37302	-0.89179				4.373	-0.79648
4.37715	-0.9105				4.3772	-0.80239
4.38135	-0.92834				4.38133	-0.81154
4.38548	-0.94171				4.38553	-0.82554
4.38968	-0.9508				4.38967	-0.84385
4.39382	-0.95834				4.39387	-0.86372
4.39802	-0.96739				4.398	-0.88325
4.40215	-0.98109				4.4022	-0.90025
4.40635	-1.00085				4.40633	-0.91179
4.41048	-1.0215				4.41053	-0.91925
4.41468	-1.03585				4.41467	-0.92699
4.41882	-1.04398				4.41887	-0.93682
4.42302	-1.05182				4.423	-0.94929
4.42715	-1.06339				4.4272	-0.96496
4.43135	-1.07692				4.43133	-0.98131
4.43548	-1.08769				4.43553	-0.99442
4.43968	-1.09371				4.43967	-1.00412
4.44382	-1.09654				4.44387	-1.01268
4.44802	-1.09901				4.448	-1.022
4.45215	-1.10361				4.4522	-1.03446
4.45635	-1.11004				4.45633	-1.05058
4.46048	-1.11584				4.46053	-1.06679
4.46468	-1.12012				4.46467	-1.08032
4.46882	-1.12466				4.46887	-1.09277
4.47302	-1.13094				4.473	-1.10726
4.47715	-1.13788				4.4772	-1.12595
4.48135	-1.14463				4.48133	-1.14963
4.48548	-1.15213				4.48553	-1.17609
4.48968	-1.15926				4.48967	-1.20023
4.49382	-1.16276				4.49387	-1.21852
4.49802	-1.16125				4.498	-1.23085
4.50215	-1.15737				4.5022	-1.23878
4.50635	-1.15764				4.50633	-1.24517
4.51048	-1.16513				4.51053	-1.25335
4.51468	-1.17208				4.51467	-1.26545
4.51882	-1.16852				4.51887	-1.28214
4.52302	-1.1548				4.523	-1.30205
4.52715	-1.13942				4.5272	-1.32245
4.53135	-1.12996				4.53133	-1.34166
4.53548	-1.12692				4.53553	-1.35967
4.53968	-1.12345				4.53967	-1.37853
4.54382	-1.11521				4.54387	-1.40213
4.54802	-1.1057				4.548	-1.43152
4.55215	-1.09624				4.5522	-1.46142
4.55635	-1.08293				4.55633	-1.48425
4.56048	-1.0675				4.56053	-1.49577
4.56468	-1.05748				4.56467	-1.49797
4.56882	-1.05591				4.56887	-1.49872
4.57302	-1.06018				4.573	-1.50546
4.57715	-1.06524				4.5772	-1.51855
4.58135	-1.06292				4.58133	-1.53281
4.58548	-1.04766				4.58553	-1.54515
4.58968	-1.0251				4.58967	-1.55764
4.59382	-1.00778				4.59387	-1.57219
4.59802	-1.00068				4.598	-1.58839
4.60215	-0.99574				4.6022	-1.6057
4.60635	-0.98368				4.60633	-1.62245
4.61048	-0.96372				4.61053	-1.63814
4.61468	-0.938				4.61467	-1.65419
4.61882	-0.90834				4.61887	-1.6687
4.62302	-0.87898				4.623	-1.67976
4.62715	-0.85285				4.6272	-1.69003
4.63135	-0.83011				4.63133	-1.69932
4.63548	-0.81103				4.63553	-1.70221
4.63968	-0.79319				4.63967	-1.69647
4.64382	-0.77162				4.64387	-1.6868
4.64802	-0.74596				4.648	-1.68086
4.65215	-0.72213				4.6522	-1.68467
4.65635	-0.70325				4.65633	-1.69847
4.66048	-0.68305				4.66053	-1.71471
4.66468	-0.65634				4.66467	-1.72403
4.66882	-0.62682				4.66887	-1.72369
4.67302	-0.59694				4.673	-1.71831
4.67715	-0.56303				4.6772	-1.715
4.68135	-0.52327				4.68133	-1.71728
4.68548	-0.48179				4.68553	-1.72187
4.68968	-0.44384				4.68967	-1.72275
4.69382	-0.40912				4.69387	-1.71659
4.69802	-0.3734				4.698	-1.70342
4.70215	-0.33596				4.7022	-1.6862
4.70635	-0.30023				4.70633	-1.67092
4.71048	-0.26617				4.71053	-1.6629
4.71468	-0.22888				4.71467	-1.66061
4.71882	-0.18806				4.71887	-1.65714
4.72302	-0.14818				4.723	-1.64771
4.72715	-0.10719				4.7272	-1.63257
4.73135	-0.0593				4.73133	-1.61424
4.73548	-0.00584				4.73553	-1.59618
4.73968	0.04748				4.73967	-1.58251
4.74382	0.09836				4.74387	-1.57368
4.74802	0.14818				4.748	-1.56418
4.75215	0.19798				4.7522	-1.54795
4.75635	0.24603				4.75633	-1.52458
4.76048	0.29112				4.76053	-1.49946
4.76468	0.33703				4.76467	-1.47962
4.76882	0.38887				4.76887	-1.46733
4.77302	0.4471				4.773	-1.45564
4.77715	0.5089				4.7772	-1.43457
4.78135	0.57221				4.78133	-1.40194
4.78548	0.63548				4.78553	-1.3641
4.78968	0.69673				4.78967	-1.32957
4.79382	0.75573				4.79387	-1.30278
4.79802	0.81415				4.798	-1.28058
4.80215	0.87173				4.8022	-1.25677
4.80635	0.92625				4.80633	-1.22947
4.81048	0.9788				4.81053	-1.20032
4.81468	1.03337				4.81467	-1.16983
4.81882	1.09143				4.81887	-1.13619
4.82302	1.15124				4.823	-1.09653
4.82715	1.20944				4.8272	-1.04905
4.83135	1.26527				4.83133	-0.99588
4.83548	1.32387				4.83553	-0.94381
4.83968	1.38877				4.83967	-0.90047
4.84382	1.45734				4.84387	-0.86762
4.84802	1.52879				4.848	-0.83921
4.85215	1.60408				4.8522	-0.80701
4.85635	1.68056				4.85633	-0.76632
4.86048	1.75558				4.86053	-0.71592
4.86468	1.83054				4.86467	-0.65637
4.86882	1.9089				4.86887	-0.591
4.87302	1.99137				4.873	-0.52619
4.87715	2.07293				4.8772	-0.46833
4.88135	2.14703				4.88133	-0.41906
4.88548	2.21253				4.88553	-0.37313
4.88968	2.27564				4.88967	-0.32201
4.89382	2.34338				4.89387	-0.26004
4.89802	2.41606				4.898	-0.18831
4.90215	2.48991				4.9022	-0.11309
4.90635	2.56415				4.90633	-0.04001
4.91048	2.63919				4.91053	0.02927
4.91468	2.71248				4.91467	0.09574
4.91882	2.78265				4.91887	0.16209
4.92302	2.85279				4.923	0.2309
4.92715	2.92602				4.9272	0.30168
4.93135	3.0023				4.93133	0.37145
4.93548	3.07948				4.93553	0.43763
4.93968	3.15374				4.93967	0.50086
4.94382	3.22289				4.94387	0.56634
4.94802	3.29184				4.948	0.64074
4.95215	3.36868				4.9522	0.72648
4.95635	3.4546				4.95633	0.82029
4.96048	3.54329				4.96053	0.91759
4.96468	3.6288				4.96467	1.01552
4.96882	3.70944				4.96887	1.11227
4.97302	3.78615				4.973	1.20717
4.97715	3.86071				4.9772	1.30134
4.98135	3.93407				4.98133	1.39608
4.98548	4.00712				4.98553	1.49187
4.98968	4.08359				4.98967	1.58949
4.99382	4.16722				4.99387	1.68992
4.99802	4.25597				4.998	1.79315
5.00215	4.34282				5.0022	1.89842
5.00635	4.42202				5.00633	2.00443
5.01048	4.49301				5.01053	2.10929
5.01468	4.56026				5.01467	2.21254
5.01882	4.63205				5.01887	2.31682
5.02302	4.71446				5.023	2.42473
5.02715	4.80357				5.0272	2.53546
5.03135	4.89021				5.03133	2.64718
5.03548	4.97136				5.03553	2.75974
5.03968	5.04916				5.03967	2.87326
5.04382	5.125				5.04387	2.98595
5.04802	5.20001				5.048	3.09496
5.05215	5.27355				5.0522	3.19929
5.05635	5.34358				5.05633	3.30089
5.06048	5.41362				5.06053	3.40272
5.06468	5.49217				5.06467	3.50736
5.06882	5.58285				5.06887	3.6173
5.07302	5.68006				5.073	3.7336
5.07715	5.77448				5.0772	3.85462
5.08135	5.85948				5.08133	3.97921
5.08548	5.93308				5.08553	4.10882
5.08968	5.99767				5.08967	4.24403
5.09382	6.0594				5.09387	4.38241
5.09802	6.12624				5.098	4.52101
5.10215	6.2036				5.1022	4.65772
5.10635	6.29103				5.10633	4.7903
5.11048	6.38236				5.11053	4.91671
5.11468	6.46867				5.11467	5.03657
5.11882	6.54617				5.11887	5.1517
5.12302	6.61957				5.123	5.26552
5.12715	6.69545				5.1272	5.38173
5.13135	6.77589				5.13133	5.50193
5.13548	6.85692				5.13553	5.62322
5.13968	6.93305				5.13967	5.74042
5.14382	7.00475				5.14387	5.85214
5.14802	7.07522				5.148	5.96279
5.15215	7.14456				5.1522	6.07679
5.15635	7.2138				5.15633	6.19329
5.16048	7.28396				5.16053	6.30871
5.16468	7.3526				5.16467	6.42171
5.16882	7.4198				5.16887	6.53389
5.17302	7.49059				5.173	6.64689
5.17715	7.56708				5.1772	6.75891
5.18135	7.64517				5.18133	6.86649
5.18548	7.72108				5.18553	6.97035
5.18968	7.79381				5.18967	7.07524
5.19382	7.86296				5.19387	7.18373
5.19802	7.92961				5.198	7.2929
5.20215	7.99393				5.2022	7.39669
5.20635	8.05384				5.20633	7.49176
5.21048	8.11146				5.21053	7.58038
5.21468	8.1727				5.21467	7.66799
5.21882	8.23897				5.21887	7.76103
5.22302	8.30664				5.223	7.86351
5.22715	8.37283				5.2272	7.97276
5.23135	8.43696				5.23133	8.08146
5.23548	8.49781				5.23553	8.18428
5.23968	8.55352				5.23967	8.28143
5.24382	8.6062				5.24387	8.37634
5.24802	8.66265				5.248	8.47163
5.25215	8.72782				5.2522	8.56724
5.25635	8.79852				5.25633	8.66014
5.26048	8.86661				5.26053	8.74548
5.26468	8.92752				5.26467	8.8235
5.26882	8.98063				5.26887	8.9026
5.27302	9.02714				5.273	8.98986
5.27715	9.07227				5.2772	9.08131
5.28135	9.12048				5.28133	9.16554
5.28548	9.17166				5.28553	9.23781
5.28968	9.22751				5.28967	9.30616
5.29382	9.28855				5.29387	9.38039
5.29802	9.34847				5.298	9.46073
5.30215	9.40254				5.3022	9.53912
5.30635	9.45205				5.30633	9.6088
5.31048	9.49957				5.31053	9.67114
5.31468	9.54834				5.31467	9.73347
5.31882	9.599				5.31887	9.80193
5.32302	9.64809				5.323	9.8759
5.32715	9.69574				5.3272	9.94821
5.33135	9.74584				5.33133	10.0135
5.33548	9.79878				5.33553	10.0752
5.33968	9.85259				5.33967	10.1415
5.34382	9.90633				5.34387	10.2159
5.34802	9.95787				5.348	10.2941
5.35215	10.0032				5.3522	10.37
5.35635	10.0412				5.35633	10.441
5.36048	10.0783				5.36053	10.5091
5.36468	10.1216				5.36467	10.5767
5.36882	10.1707				5.36887	10.6445
5.37302	10.2176				5.373	10.7098
5.37715	10.2568				5.3772	10.7698
5.38135	10.2921				5.38133	10.8261
5.38548	10.3307				5.38553	10.885
5.38968	10.3727				5.38967	10.9494
5.39382	10.4155				5.39387	11.0145
5.39802	10.4586				5.398	11.0706
5.40215	10.4991				5.4022	11.1133
5.40635	10.5336				5.40633	11.1504
5.41048	10.565				5.41053	11.1937
5.41468	10.6006				5.41467	11.2475
5.41882	10.6435				5.41887	11.3079
5.42302	10.6886				5.423	11.3677
5.42715	10.7273				5.4272	11.4209
5.43135	10.7584				5.43133	11.467
5.43548	10.7857				5.43553	11.5097
5.43968	10.8107				5.43967	11.5518
5.44382	10.837				5.44387	11.5935
5.44802	10.87				5.448	11.6352
5.45215	10.9094				5.4522	11.6777
5.45635	10.9498				5.45633	11.722
5.46048	10.9875				5.46053	11.7654
5.46468	11.0208				5.46467	11.8029
5.46882	11.0478				5.46887	11.8326
5.47302	11.0699				5.473	11.8596
5.47715	11.0925				5.4772	11.8915
5.48135	11.1198				5.48133	11.9311
5.48548	11.1528				5.48553	11.9759
5.48968	11.1892				5.48967	12.0214
5.49382	11.2259				5.49387	12.0636
5.49802	11.2624				5.498	12.1006
5.50215	11.3011				5.5022	12.1337
5.50635	11.3422				5.50633	12.1673
5.51048	11.3811				5.51053	12.2052
5.51468	11.4137				5.51467	12.2475
5.51882	11.4396				5.51887	12.2917
5.52302	11.4627				5.523	12.3341
5.52715	11.4895				5.5272	12.3731
5.53135	11.5233				5.53133	12.409
5.53548	11.558				5.53553	12.4431
5.53968	11.5862				5.53967	12.4764
5.54382	11.6089				5.54387	12.5089
5.54802	11.6306				5.548	12.5404
5.55215	11.6515				5.5522	12.5714
5.55635	11.6727				5.55633	12.6017
5.56048	11.6977				5.56053	12.6308
5.56468	11.7266				5.56467	12.6584
5.56882	11.756				5.56887	12.6831
5.57302	11.781				5.573	12.7022
5.57715	11.7991				5.5772	12.7163
5.58135	11.815				5.58133	12.7327
5.58548	11.8366				5.58553	12.7591
5.58968	11.8653				5.58967	12.7956
5.59382	11.8951				5.59387	12.835
5.59802	11.9194				5.598	12.8711
5.60215	11.9368				5.6022	12.9015
5.60635	11.9503				5.60633	12.9248
5.61048	11.9627				5.61053	12.9376
5.61468	11.9741				5.61467	12.9421
5.61882	11.9827				5.61887	12.9491
5.62302	11.9897				5.623	12.9669
5.62715	11.9986				5.6272	12.9911
5.63135	12.0134				5.63133	13.0115
5.63548	12.0363				5.63553	13.025
5.63968	12.0663				5.63967	13.038
5.64382	12.0968				5.64387	13.0578
5.64802	12.1196				5.648	13.086
5.65215	12.1329				5.6522	13.1183
5.65635	12.1399				5.65633	13.1482
5.66048	12.1454				5.66053	13.1712
5.66468	12.1534				5.66467	13.186
5.66882	12.1656				5.66887	13.1945
5.67302	12.1813				5.673	13.2011
5.67715	12.1987				5.6772	13.2107
5.68135	12.2143				5.68133	13.2246
5.68548	12.2271				5.68553	13.2407
5.68968	12.2392				5.68967	13.2572
5.69382	12.2528				5.69387	13.2761
5.69802	12.2675				5.698	13.3009
5.70215	12.2797				5.7022	13.3311
5.70635	12.2871				5.70633	13.3612
5.71048	12.293				5.71053	13.3851
5.71468	12.3017				5.71467	13.4017
5.71882	12.315				5.71887	13.4156
5.72302	12.3335				5.723	13.4339
5.72715	12.3562				5.7272	13.4597
5.73135	12.3783				5.73133	13.4879
5.73548	12.3946				5.73553	13.5072
5.73968	12.4054				5.73967	13.5094
5.74382	12.413				5.74387	13.4969
5.74802	12.4183				5.748	13.4824
5.75215	12.4246				5.7522	13.4781
5.75635	12.4386				5.75633	13.4873
5.76048	12.4619				5.76053	13.5056
5.76468	12.4863				5.76467	13.526
5.76882	12.5029				5.76887	13.5434
5.77302	12.5134				5.773	13.557
5.77715	12.526				5.7772	13.5689
5.78135	12.5448				5.78133	13.5817
5.78548	12.566				5.78553	13.5967
5.78968	12.5859				5.78967	13.6112
5.79382	12.6075				5.79387	13.6183
5.79802	12.6359				5.798	13.6144
5.80215	12.6676				5.8022	13.606
5.80635	12.6946				5.80633	13.6039
5.81048	12.7177				5.81053	13.6141
5.81468	12.7459				5.81467	13.6344
5.81882	12.7842				5.81887	13.6585
5.82302	12.831				5.823	13.6802
5.82715	12.885				5.8272	13.6957
5.83135	12.946				5.83133	13.702
5.83548	13.0096				5.83553	13.6993
5.83968	13.0695				5.83967	13.6922
5.84382	13.126				5.84387	13.6881
5.84802	13.1826				5.848	13.6919
5.85215	13.2373				5.8522	13.7038
5.85635	13.2851				5.85633	13.7192
5.86048	13.3272				5.86053	13.7323
5.86468	13.368				5.86467	13.7393
5.86882	13.4036				5.86887	13.738
5.87302	13.4268				5.873	13.7279
5.87715	13.4377				5.8772	13.7146
5.88135	13.4426				5.88133	13.7075
5.88548	13.4441				5.88553	13.7125
5.88968	13.4397				5.88967	13.7279
5.89382	13.4289				5.89387	13.747
5.89802	13.4159				5.898	13.7639
5.90215	13.4026				5.9022	13.7766
5.90635	13.3844				5.90633	13.7851
5.91048	13.3555				5.91053	13.7903
5.91468	13.3181				5.91467	13.7934
5.91882	13.2802				5.91887	13.7949
5.92302	13.2462				5.923	13.794
5.92715	13.2156				5.9272	13.7887
5.93135	13.1873				5.93133	13.7782
5.93548	13.1607				5.93553	13.7669
5.93968	13.1352				5.93967	13.7627
5.94382	13.1106				5.94387	13.7695
5.94802	13.0851				5.948	13.7838
5.95215	13.0575				5.9522	13.7975
5.95635	13.0314				5.95633	13.8034
5.96048	13.0116				5.96053	13.7991
5.96468	12.998				5.96467	13.7886
5.96882	12.988				5.96887	13.7792
5.97302	12.9824				5.973	13.7758
5.97715	12.9828				5.9772	13.7778
5.98135	12.986				5.98133	13.7811
5.98548	12.9876				5.98553	13.7802
5.98968	12.9868				5.98967	13.7734
5.99382	12.9839				5.99387	13.7666
5.99802	12.9794				5.998	13.7696
6.00215	12.9746				6.0022	13.7878
6.00635	12.9694				6.00633	13.8179
6.01048	12.9632				6.01053	13.8511
6.01468	12.9599				6.01467	13.878
6.01882	12.9656				6.01887	13.8959
6.02302	12.9775				6.023	13.9128
6.02715	12.9871				6.0272	13.9399
6.03135	12.9904				6.03133	13.9804
6.03548	12.9879				6.03553	14.0268
6.03968	12.9808				6.03967	14.0711
6.04382	12.9736				6.04387	14.112
6.04802	12.9729				6.048	14.1538
6.05215	12.9787				6.0522	14.201
6.05635	12.9849				6.05633	14.256
6.06048	12.9904				6.06053	14.3176
6.06468	13.0005				6.06467	14.3819
6.06882	13.0175				6.06887	14.4436
6.07302	13.0336				6.073	14.4988
6.07715	13.0376				6.0772	14.547
6.08135	13.027				6.08133	14.5885
6.08548	13.0106				6.08553	14.6219
6.08968	12.9987				6.08967	14.6436
6.09382	12.9961				6.09387	14.6494
6.09802	13.003				6.098	14.6383
6.10215	13.0154				6.1022	14.6155
6.10635	13.0254				6.10633	14.5872
6.11048	13.026				6.11053	14.5555
6.11468	13.0186				6.11467	14.5174
6.11882	13.0079				6.11887	14.4706
6.12302	12.9948				6.123	14.4186
6.12715	12.9807				6.1272	14.3676
6.13135	12.9732				6.13133	14.3212
6.13548	12.9794				6.13553	14.2776
6.13968	12.995				6.13967	14.234
6.14382	13.0069				6.14387	14.1909
6.14802	13.0077				6.148	14.1513
6.15215	13.002				6.1522	14.1173
6.15635	12.9992				6.15633	14.0865
6.16048	13.0009				6.16053	14.0547
6.16468	12.9997				6.16467	14.0218
6.16882	12.9908				6.16887	13.9941
6.17302	12.979				6.173	13.9772
6.17715	12.9728				6.1772	13.9708
6.18135	12.9731				6.18133	13.9702
6.18548	12.9735				6.18553	13.9693
6.18968	12.9704				6.18967	13.9641
6.19382	12.9663				6.19387	13.9551
6.19802	12.9673				6.198	13.9462
6.20215	12.9762				6.2022	13.9406
6.20635	12.9877				6.20633	13.9369
6.21048	12.9933				6.21053	13.9297
6.21468	12.9896				6.21467	13.9171
6.21882	12.9778				6.21887	13.9061
6.22302	12.9623				6.223	13.9043
6.22715	12.9528				6.2272	13.9113
6.23135	12.9547				6.23133	13.9217
6.23548	12.9625				6.23553	13.9305
6.23968	12.9694				6.23967	13.936
6.24382	12.9754				6.24387	13.9378
6.24802	12.981				6.248	13.9345
6.25215	12.9839				6.2522	13.9247
6.25635	12.9831				6.25633	13.9115
6.26048	12.9812				6.26053	13.9017
6.26468	12.9806				6.26467	13.9017
6.26882	12.9797				6.26887	13.9136
6.27302	12.9754				6.273	13.933
6.27715	12.9708				6.2772	13.953
6.28135	12.9738				6.28133	13.9685
6.28548	12.9862				6.28553	13.978
6.28968	13.0009				6.28967	13.9829
6.29382	13.0101				6.29387	13.9862
6.29802	13.0124				6.298	13.9895
6.30215	13.0117				6.3022	13.9912
6.30635	13.0088				6.30633	13.9866
6.31048	13.0016				6.31053	13.9749
6.31468	12.9915				6.31467	13.9617
6.31882	12.985				6.31887	13.9535
6.32302	12.9879				6.323	13.9544
6.32715	12.9984				6.3272	13.9647
6.33135	13.0075				6.33133	13.9802
6.33548	13.0094				6.33553	13.9956
6.33968	13.0062				6.33967	14.0073
6.34382	13.0023				6.34387	14.0143
6.34802	13.0006				6.348	14.0172
6.35215	13.0025				6.3522	14.0178
6.35635	13.007				6.35633	14.0189
6.36048	13.0118				6.36053	14.0208
6.36468	13.0166				6.36467	14.0216
6.36882	13.0227				6.36887	14.0191
6.37302	13.0292				6.373	14.014
6.37715	13.0313				6.3772	14.0064
6.38135	13.0257				6.38133	13.9983
6.38548	13.0179				6.38553	13.9938
6.38968	13.0185				6.38967	13.9967
6.39382	13.0312				6.39387	14.007
6.39802	13.0459				6.398	14.0224
6.40215	13.0502				6.4022	14.0394
6.40635	13.0441				6.40633	14.0541
6.41048	13.0372				6.41053	14.0646
6.41468	13.0338				6.41467	14.071
6.41882	13.0302				6.41887	14.0746
6.42302	13.0251				6.423	14.0754
6.42715	13.0233				6.4272	14.072
6.43135	13.028				6.43133	14.0633
6.43548	13.0348				6.43553	14.0506
6.43968	13.0382				6.43967	14.0387
6.44382	13.0397				6.44387	14.0332
6.44802	13.0434				6.448	14.0366
6.45215	13.0482				6.4522	14.0475
6.45635	13.0487				6.45633	14.063
6.46048	13.0443				6.46053	14.079
6.46468	13.0406				6.46467	14.0929
6.46882	13.0398				6.46887	14.1048
6.47302	13.0386				6.473	14.1146
6.47715	13.0367				6.4772	14.1223
6.48135	13.0384				6.48133	14.1282
6.48548	13.045				6.48553	14.1326
6.48968	13.0526				6.48967	14.136
6.49382	13.0591				6.49387	14.1402
6.49802	13.0657				6.498	14.1452
6.50215	13.0726				6.5022	14.1482
6.50635	13.0784				6.50633	14.144
6.51048	13.0825				6.51053	14.1313
6.51468	13.083				6.51467	14.1166
6.51882	13.0792				6.51887	14.1095
6.52302	13.0752				6.523	14.1143
6.52715	13.0773				6.5272	14.127
6.53135	13.088				6.53133	14.139
6.53548	13.1019				6.53553	14.1449
6.53968	13.112				6.53967	14.1473
6.54382	13.1179				6.54387	14.1522
6.54802	13.1247				6.548	14.1614
6.55215	13.1355				6.5522	14.1723
6.55635	13.1467				6.55633	14.1815
6.56048	13.1564				6.56053	14.1875
6.56468	13.1675				6.56467	14.1926
6.56882	13.1793				6.56887	14.2006
6.57302	13.187				6.573	14.2124
6.57715	13.1921				6.5772	14.2222
6.58135	13.2006				6.58133	14.2252
6.58548	13.2134				6.58553	14.2256
6.58968	13.2275				6.58967	14.2303
6.59382	13.2394				6.59387	14.2382
6.59802	13.2467				6.598	14.2418
6.60215	13.2533				6.6022	14.2372
6.60635	13.2639				6.60633	14.2284
6.61048	13.2773				6.61053	14.224
6.61468	13.2925				6.61467	14.2281
6.61882	13.3101				6.61887	14.235
6.62302	13.3277				6.623	14.2358
6.62715	13.343				6.6272	14.2293
6.63135	13.359				6.63133	14.2211
6.63548	13.3767				6.63553	14.2185
6.63968	13.3932				6.63967	14.2248
6.64382	13.409				6.64387	14.2397
6.64802	13.4263				6.648	14.2609
6.65215	13.4442				6.6522	14.2842
6.65635	13.4653				6.65633	14.3031
6.66048	13.495				6.66053	14.313
6.66468	13.5332				6.66467	14.3154
6.66882	13.5719				6.66887	14.3168
6.67302	13.6024				6.673	14.3233
6.67715	13.6235				6.6772	14.336
6.68135	13.639				6.68133	14.3514
6.68548	13.6511				6.68553	14.3658
6.68968	13.6606				6.68967	14.3788
6.69382	13.6676				6.69387	14.3909
6.69802	13.6687				6.698	14.401
6.70215	13.6609				6.7022	14.4076
6.70635	13.646				6.70633	14.411
6.71048	13.6279				6.71053	14.4133
6.71468	13.61				6.71467	14.4166
6.71882	13.5945				6.71887	14.421
6.72302	13.5816				6.723	14.4231
6.72715	13.5676				6.7272	14.4191
6.73135	13.5484				6.73133	14.4094
6.73548	13.5253				6.73553	14.3978
6.73968	13.5015				6.73967	14.389
6.74382	13.4793				6.74387	14.3871
6.74802	13.464				6.748	14.3919
6.75215	13.4607				6.7522	14.398
6.75635	13.466				6.75633	14.4016
6.76048	13.4739				6.76053	14.4037
6.76468	13.4846				6.76467	14.4061
6.76882	13.4999				6.76887	14.4108
6.77302	13.5178				6.773	14.4221
6.77715	13.5359				6.7772	14.4426
6.78135	13.5569				6.78133	14.4705
6.78548	13.5852				6.78553	14.5001
6.78968	13.6226				6.78967	14.5255
6.79382	13.6665				6.79387	14.5476
6.79802	13.7148				6.798	14.5733
6.80215	13.768				6.8022	14.6045
6.80635	13.8257				6.80633	14.6357
6.81048	13.8839				6.81053	14.6609
6.81468	13.9386				6.81467	14.6794
6.81882	13.991				6.81887	14.6947
6.82302	14.0456				6.823	14.71
6.82715	14.105				6.8272	14.7271
6.83135	14.1664				6.83133	14.7453
6.83548	14.2239				6.83553	14.7602
6.83968	14.2742				6.83967	14.7675
6.84382	14.3187				6.84387	14.7661
6.84802	14.3616				6.848	14.7569
6.85215	14.4054				6.8522	14.7397
6.85635	14.4485				6.85633	14.7129
6.86048	14.4831				6.86053	14.6766
6.86468	14.5005				6.86467	14.6347
6.86882	14.5017				6.86887	14.5928
6.87302	14.4951				6.873	14.5558
6.87715	14.4847				6.8772	14.5267
6.88135	14.4686				6.88133	14.506
6.88548	14.4456				6.88553	14.4938
6.88968	14.4196				6.88967	14.4889
6.89382	14.3945				6.89387	14.4871
6.89802	14.3675				6.898	14.483
6.90215	14.3329				6.9022	14.4754
6.90635	14.291				6.90633	14.47
6.91048	14.2463				6.91053	14.4733
6.91468	14.2005				6.91467	14.4868
6.91882	14.1528				6.91887	14.5047
6.92302	14.1056				6.923	14.5194
6.92715	14.0622				6.9272	14.5284
6.93135	14.0215				6.93133	14.5366
6.93548	13.9805				6.93553	14.5522
6.93968	13.9398				6.93967	14.5818
6.94382	13.9022				6.94387	14.6268
6.94802	13.8684				6.948	14.6828
6.95215	13.8384				6.9522	14.7426
6.95635	13.8118				6.95633	14.7993
6.96048	13.7873				6.96053	14.8506
6.96468	13.7637				6.96467	14.9002
6.96882	13.7399				6.96887	14.9533
6.97302	13.7157				6.973	15.0098
6.97715	13.6941				6.9772	15.0639
6.98135	13.6796				6.98133	15.1123
6.98548	13.6725				6.98553	15.1585
6.98968	13.6679				6.98967	15.206
6.99382	13.6605				6.99387	15.2537
6.99802	13.6488				6.998	15.2972
7.00215	13.6367				7.0022	15.3317
7.00635	13.6296				7.00633	15.3533
7.01048	13.6293				7.01053	15.3613
7.01468	13.6342				7.01467	15.3595
7.01882	13.6418				7.01887	15.3543
7.02302	13.6486				7.023	15.3496
7.02715	13.6523				7.0272	15.3429
7.03135	13.6524				7.03133	15.3305
7.03548	13.6469				7.03553	15.3102
7.03968	13.6357				7.03967	15.2799
7.04382	13.6241				7.04387	15.2374
7.04802	13.6193				7.048	15.1849
7.05215	13.6245				7.0522	15.1289
7.05635	13.6353				7.05633	15.0756
7.06048	13.6444				7.06053	15.0266
7.06468	13.6499				7.06467	14.9781
7.06882	13.6555				7.06887	14.9271
7.07302	13.662				7.073	14.8765
7.07715	13.6663				7.0772	14.8315
7.08135	13.6657				7.08133	14.7927
7.08548	13.6608				7.08553	14.7561
7.08968	13.655				7.08967	14.7181
7.09382	13.6512				7.09387	14.6794
7.09802	13.6481				7.098	14.6424
7.10215	13.6438				7.1022	14.6065
7.10635	13.6395				7.10633	14.5711
7.11048	13.6374				7.11053	14.5402
7.11468	13.6392				7.11467	14.519
7.11882	13.6445				7.11887	14.5071
7.12302	13.6496				7.123	14.4991
7.12715	13.652				7.1272	14.4898
7.13135	13.6571				7.13133	14.4769
7.13548	13.6713				7.13553	14.4611
7.13968	13.6928				7.13967	14.4444
7.14382	13.7149				7.14387	14.4282
7.14802	13.7364				7.148	14.4124
7.15215	13.7588				7.1522	14.3987
7.15635	13.7835				7.15633	14.3894
7.16048	13.8116				7.16053	14.3834
7.16468	13.8437				7.16467	14.3751
7.16882	13.8793				7.16887	14.3604
7.17302	13.92				7.173	14.3435
7.17715	13.9701				7.1772	14.3324
7.18135	14.0313				7.18133	14.329
7.18548	14.0973				7.18553	14.3286
7.18968	14.1588				7.18967	14.3237
7.19382	14.2147				7.19387	14.3103
7.19802	14.2702				7.198	14.2949
7.20215	14.3273				7.2022	14.2861
7.20635	14.3839				7.20633	14.285
7.21048	14.436				7.21053	14.2888
7.21468	14.4767				7.21467	14.2943
7.21882	14.4963				7.21887	14.2985
7.22302	14.4901				7.223	14.3014
7.22715	14.4642				7.2272	14.3045
7.23135	14.428				7.23133	14.3083
7.23548	14.3874				7.23553	14.3111
7.23968	14.3404				7.23967	14.3109
7.24382	14.2816				7.24387	14.3081
7.24802	14.2131				7.248	14.3053
7.25215	14.1436				7.2522	14.3044
7.25635	14.0766				7.25633	14.3056
7.26048	14.0104				7.26053	14.308
7.26468	13.9484				7.26467	14.31
7.26882	13.8967				7.26887	14.3101
7.27302	13.8534				7.273	14.3076
7.27715	13.8113				7.2772	14.304
7.28135	13.7722				7.28133	14.3021
7.28548	13.7442				7.28553	14.3039
7.28968	13.7281				7.28967	14.3069
7.29382	13.7166				7.29387	14.3046
7.29802	13.7064				7.298	14.293
7.30215	13.6986				7.3022	14.2774
7.30635	13.6915				7.30633	14.2681
7.31048	13.6829				7.31053	14.2677
7.31468	13.6764				7.31467	14.27
7.31882	13.6759				7.31887	14.2703
7.32302	13.6783				7.323	14.2692
7.32715	13.6785				7.3272	14.2672
7.33135	13.6784				7.33133	14.2663
7.33548	13.683				7.33553	14.2702
7.33968	13.6908				7.33967	14.2778
7.34382	13.6969				7.34387	14.283
7.34802	13.7024				7.348	14.2821
7.35215	13.7121				7.3522	14.2784
7.35635	13.7264				7.35633	14.2776
7.36048	13.7413				7.36053	14.2811
7.36468	13.7523				7.36467	14.2859
7.36882	13.7582				7.36887	14.2906
7.37302	13.7602				7.373	14.297
7.37715	13.759				7.3772	14.3063
7.38135	13.7575				7.38133	14.3159
7.38548	13.7587				7.38553	14.3222
7.38968	13.7608				7.38967	14.326
7.39382	13.7628				7.39387	14.3312
7.39802	13.7689				7.398	14.3387
7.40215	13.7804				7.4022	14.3449
7.40635	13.7915				7.40633	14.3449
7.41048	13.7985				7.41053	14.3392
7.41468	13.8028				7.41467	14.3341
7.41882	13.8052				7.41887	14.3341
7.42302	13.8025				7.423	14.341
7.42715	13.7925				7.4272	14.3541
7.43135	13.7789				7.43133	14.3707
7.43548	13.7668				7.43553	14.3877
7.43968	13.7559				7.43967	14.4026
7.44382	13.7468				7.44387	14.4132
7.44802	13.747				7.448	14.4165
7.45215	13.7611				7.4522	14.4108
7.45635	13.7822				7.45633	14.399
7.46048	13.7988				7.46053	14.3868
7.46468	13.8056				7.46467	14.3794
7.46882	13.8039				7.46887	14.3808
7.47302	13.7959				7.473	14.3923
7.47715	13.7841				7.4772	14.411
7.48135	13.7767				7.48133	14.4331
7.48548	13.7832				7.48553	14.4543
7.48968	13.8043				7.48967	14.4701
7.49382	13.8316				7.49387	14.4766
7.49802	13.855				7.498	14.4729
7.50215	13.8688				7.5022	14.4621
7.50635	13.8709				7.50633	14.4506
7.51048	13.8623				7.51053	14.4436
7.51468	13.8522				7.51467	14.4411
7.51882	13.8514				7.51887	14.4404
7.52302	13.8605				7.523	14.4396
7.52715	13.8716				7.5272	14.4388
7.53135	13.8815				7.53133	14.4416
7.53548	13.8933				7.53553	14.4518
7.53968	13.9069				7.53967	14.4682
7.54382	13.9159				7.54387	14.4843
7.54802	13.9171				7.548	14.4943
7.55215	13.9163				7.5522	14.4982
7.55635	13.9203				7.55633	14.4973
7.56048	13.929				7.56053	14.4923
7.56468	13.9371				7.56467	14.4865
7.56882	13.9425				7.56887	14.4858
7.57302	13.9505				7.573	14.4911
7.57715	13.9665				7.5772	14.4984
7.58135	13.9868				7.58133	14.5025
7.58548	14.0003				7.58553	14.499
7.58968	14.0016				7.58967	14.4876
7.59382	13.9966				7.59387	14.4759
7.59802	13.9947				7.598	14.4715
7.60215	13.9992				7.6022	14.4741
7.60635	14.0085				7.60633	14.4791
7.61048	14.0185				7.61053	14.4812
7.61468	14.0224				7.61467	14.4776
7.61882	14.0147				7.61887	14.4726
7.62302	13.9975				7.623	14.4724
7.62715	13.9804				7.6272	14.4768
7.63135	13.9738				7.63133	14.4812
7.63548	13.9798				7.63553	14.4837
7.63968	13.9903				7.63967	14.4839
7.64382	13.9955				7.64387	14.4804
7.64802	13.9953				7.648	14.4748
7.65215	13.9962				7.6522	14.4728
7.65635	14.0026				7.65633	14.4765
7.66048	14.0148				7.66053	14.4811
7.66468	14.0335				7.66467	14.4846
7.66882	14.0598				7.66887	14.4895
7.67302	14.0926				7.673	14.4957
7.67715	14.1312				7.6772	14.5018
7.68135	14.1805				7.68133	14.5069
7.68548	14.247				7.68553	14.5093
7.68968	14.3318				7.68967	14.5107
7.69382	14.4329				7.69387	14.5165
7.69802	14.5476				7.698	14.5263
7.70215	14.6739				7.7022	14.5336
7.70635	14.8169				7.70633	14.5366
7.71048	14.9849				7.71053	14.5388
7.71468	15.1755				7.71467	14.5413
7.71882	15.3766				7.71887	14.5438
7.72302	15.581				7.723	14.5477
7.72715	15.7909				7.7272	14.5538
7.73135	16.009				7.73133	14.5619
7.73548	16.2341				7.73553	14.5703
7.73968	16.4636				7.73967	14.577
7.74382	16.6976				7.74387	14.5809
7.74802	16.9445				7.748	14.58
7.75215	17.2148				7.7522	14.5719
7.75635	17.5095				7.75633	14.5596
7.76048	17.8214				7.76053	14.5509
7.76468	18.1472				7.76467	14.5504
7.76882	18.4907				7.76887	14.5558
7.77302	18.8544				7.773	14.5617
7.77715	19.2312				7.7772	14.5637
7.78135	19.6067				7.78133	14.56
7.78548	19.9684				7.78553	14.5501
7.78968	20.3069				7.78967	14.5353
7.79382	20.6043				7.79387	14.5211
7.79802	20.8347				7.798	14.5135
7.80215	20.9779				7.8022	14.5123
7.80635	21.0278				7.80633	14.5133
7.81048	20.9857				7.81053	14.515
7.81468	20.8475				7.81467	14.5207
7.81882	20.6048				7.81887	14.5324
7.82302	20.2589				7.823	14.5467
7.82715	19.8308				7.8272	14.5576
7.83135	19.3517				7.83133	14.5615
7.83548	18.8467				7.83553	14.5597
7.83968	18.3311				7.83967	14.5564
7.84382	17.8181				7.84387	14.5555
7.84802	17.3225				7.848	14.559
7.85215	16.8549				7.8522	14.5658
7.85635	16.4204				7.85633	14.5718
7.86048	16.0264				7.86053	14.5737
7.86468	15.6823				7.86467	14.5705
7.86882	15.3904				7.86887	14.5633
7.87302	15.1444				7.873	14.5534
7.87715	14.9383				7.8772	14.5426
7.88135	14.768				7.88133	14.5324
7.88548	14.6287				7.88553	14.5245
7.88968	14.5191				7.88967	14.5231
7.89382	14.438				7.89387	14.5318
7.89802	14.3785				7.898	14.5472
7.90215	14.3358				7.9022	14.5616
7.90635	14.3102				7.90633	14.5687
7.91048	14.3004				7.91053	14.5669
7.91468	14.2989				7.91467	14.5564
7.91882	14.2989				7.91887	14.5392
7.92302	14.3				7.923	14.5211
7.92715	14.307				7.9272	14.5079
7.93135	14.3248				7.93133	14.5011
7.93548	14.3528				7.93553	14.4975
7.93968	14.3869				7.93967	14.4924
7.94382	14.4248				7.94387	14.4841
7.94802	14.4663				7.948	14.4766
7.95215	14.5103				7.9522	14.4757
7.95635	14.5565				7.95633	14.4816
7.96048	14.6041				7.96053	14.4908
7.96468	14.6503				7.96467	14.4994
7.96882	14.6929				7.96887	14.5054
7.97302	14.7336				7.973	14.5093
7.97715	14.773				7.9772	14.5119
7.98135	14.8076				7.98133	14.5139
7.98548	14.8358				7.98553	14.5189
7.98968	14.8589				7.98967	14.5331
7.99382	14.8757				7.99387	14.5594
7.99802	14.8826				7.998	14.5917
8.00215	14.8786				8.0022	14.6197
8.00635	14.866				8.00633	14.6395
8.01048	14.8469				8.01053	14.6568
8.01468	14.8208				8.01467	14.6794
8.01882	14.787				8.01887	14.7138
8.02302	14.7476				8.023	14.7615
8.02715	14.7055				8.0272	14.8187
8.03135	14.6624				8.03133	14.8806
8.03548	14.6164				8.03553	14.9445
8.03968	14.5613				8.03967	15.0074
8.04382	14.4951				8.04387	15.0658
8.04802	14.4273				8.048	15.1182
8.05215	14.3699				8.0522	15.1663
8.05635	14.3254				8.05633	15.2119
8.06048	14.291				8.06053	15.2545
8.06468	14.2667				8.06467	15.2907
8.06882	14.2516				8.06887	15.3146
8.07302	14.2391				8.073	15.3221
8.07715	14.2207				8.0772	15.3153
8.08135	14.196				8.08133	15.3011
8.08548	14.171				8.08553	15.2857
8.08968	14.1496				8.08967	15.2689
8.09382	14.1337				8.09387	15.2426
8.09802	14.1221				8.098	15.1992
8.10215	14.1126				8.1022	15.1387
8.10635	14.1081				8.10633	15.0696
8.11048	14.1101				8.11053	15.0031
8.11468	14.1142				8.11467	14.9454
8.11882	14.1175				8.11887	14.8951
8.12302	14.1205				8.123	14.8479
8.12715	14.1211				8.1272	14.8019
8.13135	14.1195				8.13133	14.7598
8.13548	14.1196				8.13553	14.7261
8.13968	14.1234				8.13967	14.7035
8.14382	14.1313				8.14387	14.6895
8.14802	14.1413				8.148	14.6783
8.15215	14.1505				8.1522	14.6647
8.15635	14.1592				8.15633	14.6454
8.16048	14.1697				8.16053	14.6205
8.16468	14.1804				8.16467	14.5955
8.16882	14.1891				8.16887	14.5792
8.17302	14.1956				8.173	14.5779
8.17715	14.1991				8.1772	14.5887
8.18135	14.1959				8.18133	14.6015
8.18548	14.185				8.18553	14.609
8.18968	14.1734				8.18967	14.6117
8.19382	14.17				8.19387	14.6131
8.19802	14.1768				8.198	14.6149
8.20215	14.1916				8.2022	14.617
8.20635	14.2105				8.20633	14.6187
8.21048	14.2281				8.21053	14.6199
8.21468	14.2376				8.21467	14.6205
8.21882	14.2367				8.21887	14.6214
8.22302	14.2322				8.223	14.6244
8.22715	14.2336				8.2272	14.6307
8.23135	14.2424				8.23133	14.6393
8.23548	14.2533				8.23553	14.648
8.23968	14.2597				8.23967	14.6562
8.24382	14.2586				8.24387	14.666
8.24802	14.2541				8.248	14.6792
8.25215	14.2524				8.2522	14.6963
8.25635	14.2522				8.25633	14.7152
8.26048	14.2464				8.26053	14.7329
8.26468	14.2343				8.26467	14.7487
8.26882	14.2232				8.26887	14.7658
8.27302	14.2177				8.273	14.7874
8.27715	14.215				8.2772	14.8132
8.28135	14.2105				8.28133	14.8407
8.28548	14.2026				8.28553	14.8671
8.28968	14.1936				8.28967	14.8898
8.29382	14.188				8.29387	14.9061
8.29802	14.1896				8.298	14.9135
8.30215	14.197				8.3022	14.9146
8.30635	14.2017				8.30633	14.9156
8.31048	14.1965				8.31053	14.9198
8.31468	14.1828				8.31467	14.9253
8.31882	14.1679				8.31887	14.9274
8.32302	14.1576				8.323	14.9216
[truncated: 5,683 more rows]
