# Supplementary material for: Purified zymogens reveal mechanisms of snake venom metalloproteinase auto-activation
Source: eLife. 2026 Jun 10;15:RP109112. doi: 10.7554/eLife.109112 (PMC13252954; doi:10.7554/eLife.109112)
Supplement: Figure 5—source data 1. [file elife-109112-fig5-data1.xlsx]

## Sheet: 5a
Repeat 1
[Sample] (nM)	Buffer control		PI		PII		PIII		PII_zymogen
250	107.228	107.818	90.1369	97.9026	48.9166	53.2848	108.754	107.61	94.9905	87.9875
500	100.711	114.717	99.6013	110.175	0.658699	-6.20558	105.287	111.215	24.7877	14.4219
Repeat 2
[Sample] (nM)	Buffer control		PI		PII		PIII		PII_zymogen
250	108.475	97.8424	105.918	104.62	103.808	99.3845	105.675	113.832	108.272	107.095
500	103.483	101.454	104.701	108.15	37.0105	26.581	96.909	93.5813	69.6787	60.7508
Repeat 3
[Sample] (nM)	Buffer control		PI		PII		PIII		PII_zymogen
250	112.492	100.48	110.991	96.8684	77.6733	73.9398	106.892	99.4251	90.7406	89.9696
500	107.947	92.5668	107.785	102.915	1.82618	13.4325	105.35	86.9259	14.1224	34.0074

## Sheet: 5b
Thrombin
		Normalised data	1st derivative	2nd derivative
	0
	0.1
	0.2
	0.3
	0.4
	0.5
	0.6
	0.7
	0.8
	0.9
	1
	1.1
	1.2
	1.3
	1.4
	1.5
	1.6
	1.7
	1.8
	1.9
	2
	2.1
	2.2
	2.3
	2.4
	2.5
	2.6
	2.7
	2.8
	2.9
	3
	3.1
	3.2
	3.3
	3.4
	3.5
	3.6
	3.7
	3.8
	3.9
	4
	4.1
	4.2
	4.3
	4.4
	4.5
	4.6
	4.7
	4.8
	4.9
	5
	5.1
	5.2
	5.3
	5.4
	5.5
	5.6
	5.7
	5.8
	5.9
	6
	6.1
	6.2
	6.3
	6.4
	6.5
	6.6
	6.7
	6.8
	6.9
	7
	7.1	412.629
	7.2	412.603
	7.3	412.592
	7.4	412.579
	7.5	412.563
	7.6	412.545
	7.7	412.527	-1.58924
	7.8	412.509	-1.53159
	7.9	412.493	-1.47742
	8	412.479	-1.40337
	8.1	412.465	-1.30915
	8.2	412.451	-1.19529
	8.3	412.438	-1.0725	11.3656
	8.4	412.425	-0.94234	12.1259
	8.5	412.414	-0.80348	12.9693
	8.6	412.402	-0.65636	13.6927
	8.7	412.392	-0.50178	14.2873
	8.8	412.384	-0.36643	14.7504
	8.9	412.377	-0.22537	15.1636
	9	412.372	-0.07648	15.5326
	9.1	412.368	0.078897	15.8393
	9.2	412.367	0.239752	16.0809
	9.3	412.368	0.405329	16.2729
	9.4	412.37	0.574755	16.6344
	9.5	412.375	0.747139	16.9529
	9.6	412.382	0.921579	17.2067
	9.7	412.392	1.09724	17.4043
	9.8	412.403	1.27335	17.5527
	9.9	412.416	1.45096	17.6577
	10	412.431	1.6297	17.7269
	10.1	412.449	1.80898	17.7694
	10.2	412.469	1.98832	17.7953
	10.3	412.492	2.16742	17.8156
	10.4	412.517	2.34607	17.8424
	10.5	412.544	2.52425	17.8743
	10.6	412.572	2.70199	17.9227
	10.7	412.602	2.87947	18.0025
	10.8	412.634	3.05701	18.1291
	10.9	412.667	3.2351	18.3184
	11	412.702	3.41444	18.5868
	11.1	412.738	3.59588	18.9513
	11.2	412.776	3.78042	19.4299
	11.3	412.815	3.96927	20.0417
	11.4	412.855	4.16382	20.8058
	11.5	412.897	4.36562	21.7419
	11.6	412.939	4.57649	22.8692
	11.7	412.983	4.7984	24.2068
	11.8	413.029	5.03358	25.7743
	11.9	413.075	5.28447	27.5909
	12	413.123	5.55371	29.6756
	12.1	413.172	5.84413	32.0474
	12.2	413.223	6.15874	34.7243
	12.3	413.275	6.50069	37.7236
	12.4	413.329	6.87333	41.0622
	12.5	413.385	7.28018	44.7553
	12.6	413.444	7.72489	48.8174
	12.7	413.507	8.21131	53.2618
	12.8	413.573	8.7434	58.1007
	12.9	413.644	9.32524	63.3448
	13	413.718	9.96105	69.0026
	13.1	413.798	10.6551	75.08
	13.2	413.883	11.4118	81.5798
	13.3	413.973	12.2355	88.5016
	13.4	414.07	13.1308	95.841
	13.5	414.173	14.1021	103.59
	13.6	414.284	15.1537	111.735
	13.7	414.403	16.2898	120.258
	13.8	414.531	17.5145	129.137
	13.9	414.67	18.8315	138.343
	14	414.82	20.2443	147.842
	14.1	414.983	21.756	157.594
	14.2	415.16	23.3692	167.553
	14.3	415.353	25.0861	177.667
	14.4	415.561	26.9083	187.881
	14.5	415.787	28.8367	198.132
	14.6	416.031	30.8719	208.353
	14.7	416.296	33.0133	218.472
	14.8	416.582	35.26	228.413
	14.9	416.891	37.6099	238.098
	15	417.224	40.0602	247.443
	15.1	417.583	42.6074	256.365
	15.2	417.97	45.2467	264.779
	15.3	418.387	47.9726	272.601
	15.4	418.834	50.7788	279.748
	15.5	419.314	53.6578	286.137
	15.6	419.827	56.6014	291.692
	15.7	420.375	59.6005	296.341
	15.8	420.959	62.6454	300.017
	15.9	421.58	65.7255	302.661
	16	422.237	68.8297	304.221
	16.1	422.932	71.9463	304.654
	16.2	423.665	75.0633	303.927
	16.3	424.436	78.1683	302.016
	16.4	425.245	81.2487	298.909
	16.5	426.093	84.2919	294.603
	16.6	426.977	87.2853	289.108
	16.7	427.899	90.2162	282.443
	16.8	428.856	93.0726	274.64
	16.9	429.848	95.8425	265.739
	17	430.873	98.5145	255.792
	17.1	431.931	101.078	244.861
	17.2	433.019	103.523	233.015
	17.3	434.136	105.84	220.332
	17.4	435.279	108.02	206.899
	17.5	436.447	110.057	192.805
	17.6	437.637	111.944	178.149
	17.7	438.848	113.675	163.029
	17.8	440.077	115.247	147.547
	17.9	441.322	116.656	131.808
	18	442.58	117.9	115.914
	18.1	443.849	118.979	99.9675
	18.2	445.128	119.892	84.0694
	18.3	446.413	120.641	68.3157
	18.4	447.703	121.228	52.7986
	18.5	448.995	121.656	37.6046
	18.6	450.287	121.93	22.8143
	18.7	451.578	122.053	8.50169
	18.8	452.866	122.032	-5.26632
	18.9	454.148	121.873	-18.4307
	19	455.425	121.583	-30.9402
	19.1	456.693	121.169	-42.752
	19.2	457.951	120.638	-53.8312
	19.3	459.199	119.999	-64.1518
	19.4	460.436	119.26	-73.6956
	19.5	461.661	118.43	-82.4518
	19.6	462.872	117.516	-90.4174
	19.7	464.069	116.526	-97.5959
	19.8	465.252	115.47	-103.998
	19.9	466.42	114.355	-109.639
	20	467.572	113.189	-114.543
	20.1	468.709	111.979	-118.735
	20.2	469.831	110.733	-122.247
	20.3	470.937	109.457	-125.113
	20.4	472.027	108.158	-127.37
	20.5	473.102	106.843	-129.056
	20.6	474.161	105.515	-130.211
	20.7	475.205	104.181	-130.877
	20.8	476.235	102.846	-131.094
	20.9	477.249	101.513	-130.904
	21	478.249	100.186	-130.348
	21.1	479.236	98.8681	-129.465
	21.2	480.208	97.5633	-128.293
	21.3	481.167	96.2737	-126.868
	21.4	482.112	95.0015	-125.224
	21.5	483.044	93.7486	-123.394
	21.6	483.963	92.5166	-121.407
	21.7	484.87	91.3068	-119.293
	21.8	485.765	90.1201	-117.078
	21.9	486.648	88.9573	-114.785
	22	487.52	87.8189	-112.435
	22.1	488.381	86.7053	-110.046
	22.2	489.231	85.6167	-107.635
	22.3	490.071	84.5529	-105.216
	22.4	490.901	83.5139	-102.801
	22.5	491.72	82.4995	-100.4
	22.6	492.53	81.5093	-98.0252
	22.7	493.33	80.5431	-95.6829
	22.8	494.12	79.6005	-93.3802
	22.9	494.902	78.6809	-91.122
	23	495.674	77.784	-88.9125
	23.1	496.437	76.9092	-86.7554
	23.2	497.192	76.0559	-84.6538
	23.3	497.939	75.2234	-82.61
	23.4	498.679	74.411	-80.6257
	23.5	499.41	73.6183	-78.7024
	23.6	500.135	72.8444	-76.841
	23.7	500.853	72.0888	-75.0412
	23.8	501.564	71.3509	-73.3018
	23.9	502.267	70.6299	-71.6214
	24	502.964	69.9254	-69.9988
	24.1	503.653	69.2367	-68.4328
	24.2	504.336	68.5631	-66.9221
	24.3	505.012	67.9043	-65.4652
	24.4	505.682	67.2597	-64.0607
	24.5	506.345	66.6288	-62.7072
	24.6	507.003	66.0112	-61.4029
	24.7	507.655	65.4063	-60.1456
	24.8	508.301	64.8137	-58.9331
	24.9	508.941	64.233	-57.7638
	25	509.576	63.6636	-56.636
	25.1	510.206	63.1051	-55.548
	25.2	510.83	62.557	-54.4978
	25.3	511.449	62.0192	-53.483
	25.4	512.063	61.4911	-52.5017
	25.5	512.672	60.9726	-51.5517
	25.6	513.276	60.4633	-50.6306
	25.7	513.875	59.963	-49.7362
	25.8	514.468	59.4714	-48.8671
	25.9	515.057	58.9884	-48.0225
	26	515.64	58.5136	-47.2015
	26.1	516.22	58.0468	-46.4032
	26.2	516.794	57.5879	-45.6268
	26.3	517.365	57.1367	-44.8718
	26.4	517.931	56.693	-44.1377
	26.5	518.492	56.2565	-43.424
	26.6	519.05	55.827	-42.73
	26.7	519.604	55.4043	-42.0554
	26.8	520.153	54.9881	-41.4003
	26.9	520.698	54.5784	-40.7648
	27	521.239	54.1749	-40.1483
	27.1	521.776	53.7775	-39.5505
	27.2	522.31	53.3859	-38.9712
	27.3	522.839	53.0001	-38.4101
	27.4	523.365	52.6199	-37.8671
	27.5	523.887	52.245	-37.342
	27.6	524.405	51.8752	-36.8344
	27.7	524.919	51.5104	-36.3447
	27.8	525.43	51.1504	-35.8725
	27.9	525.938	50.7951	-35.4176
	28	526.443	50.4441	-34.979
	28.1	526.944	50.0974	-34.5556
	28.2	527.442	49.7548	-34.1467
	28.3	527.936	49.4161	-33.7509
	28.4	528.427	49.0812	-33.367
	28.5	528.915	48.75	-32.9935
	28.6	529.4	48.4224	-32.6288
	28.7	529.881	48.0983	-32.2717
	28.8	530.359	47.7776	-31.9204
	28.9	530.834	47.4603	-31.573
	29	531.306	47.1464	-31.2277
	29.1	531.775	46.8358	-30.8832
	29.2	532.241	46.5286	-30.5379
	29.3	532.703	46.2248	-30.1905
	29.4	533.163	45.9243	-29.8399
	29.5	533.62	45.6274	-29.4849
	29.6	534.073	45.3339	-29.1249
	29.7	534.524	45.044	-28.7592
	29.8	534.971	44.7578	-28.3872
	29.9	535.416	44.4754	-28.0084
	30	535.857	44.1968	-27.623
	30.1	536.296	43.9221	-27.2316
	30.2	536.732	43.6514	-26.8346
	30.3	537.165	43.3847	-26.433
	30.4	537.596	43.1222	-26.0279
	30.5	538.024	42.8638	-25.6205
	30.6	538.449	42.6096	-25.2122
	30.7	538.872	42.3596	-24.8047
	30.8	539.292	42.1138	-24.3994
	30.9	539.71	41.8721	-23.9985
	31	540.125	41.6345	-23.6041
	31.1	540.538	41.401	-23.2182
	31.2	540.948	41.1713	-22.8426
	31.3	541.357	40.9456	-22.479
	31.4	541.764	40.7235	-22.1291
	31.5	542.168	40.5049	-21.7942
	31.6	542.57	40.2897	-21.4751
	31.7	542.971	40.0776	-21.1729
	31.8	543.369	39.8685	-20.888
	31.9	543.766	39.6621	-20.6211
	32	544.16	39.4583	-20.372
	32.1	544.553	39.2568	-20.1403
	32.2	544.944	39.0575	-19.9252
	32.3	545.333	38.8602	-19.7253
	32.4	545.721	38.6648	-19.5397
	32.5	546.106	38.471	-19.3668
	32.6	546.489	38.2788	-19.2049
	32.7	546.871	38.0881	-19.0529
	32.8	547.25	37.8987	-18.909
	32.9	547.628	37.7105	-18.7719
	33	548.005	37.5237	-18.6395
	33.1	548.379	37.3381	-18.5099
	33.2	548.751	37.1537	-18.3815
	33.3	549.122	36.9704	-18.2525
	33.4	549.49	36.7884	-18.1216
	33.5	549.857	36.6076	-17.9878
	33.6	550.221	36.428	-17.8502
	33.7	550.584	36.2498	-17.708
	33.8	550.946	36.0731	-17.561
	33.9	551.305	35.8978	-17.4083
	34	551.662	35.7241	-17.2498
	34.1	552.018	35.552	-17.0859
	34.2	552.371	35.3817	-16.9171
	34.3	552.723	35.2131	-16.7444
	34.4	553.073	35.0463	-16.569
	34.5	553.421	34.8815	-16.3923
	34.6	553.768	34.7184	-16.2155
	34.7	554.113	34.5573	-16.0397
	34.8	554.456	34.398	-15.866
	34.9	554.799	34.2405	-15.6953
	35	555.14	34.0848	-15.5284
	35.1	555.479	33.9307	-15.3663
	35.2	555.817	33.7782	-15.2099
	35.3	556.153	33.6272	-15.0597
	35.4	556.488	33.4778	-14.9162
	35.5	556.822	33.3297	-14.7794
	35.6	557.155	33.1829	-14.6489
	35.7	557.485	33.0375	-14.5246
	35.8	557.814	32.8932	-14.4062
	35.9	558.141	32.7501	-14.2932
	36	558.468	32.608	-14.1856
	36.1	558.793	32.467	-14.0829
	36.2	559.117	32.3269	-13.9844
	36.3	559.439	32.1877	-13.8895
	36.4	559.76	32.0495	-13.7969
	36.5	560.08	31.9121	-13.7054
	36.6	560.399	31.7755	-13.6139
	36.7	560.716	31.6397	-13.5213
	36.8	561.032	31.5048	-13.427
	36.9	561.346	31.3708	-13.3301
	37	561.659	31.2376	-13.2298
	37.1	561.97	31.1055	-13.1257
	37.2	562.28	30.9744	-13.0168
	37.3	562.588	30.8444	-12.903
	37.4	562.895	30.7157	-12.7839
	37.5	563.201	30.5881	-12.6597
	37.6	563.505	30.4619	-12.5308
	37.7	563.808	30.337	-12.3981
	37.8	564.11	30.2135	-12.2624
	37.9	564.411	30.0914	-12.1245
	38	564.711	29.9707	-11.9851
	38.1	565.009	29.8516	-11.845
	38.2	565.307	29.7339	-11.705
	38.3	565.603	29.6177	-11.5658
	38.4	565.897	29.5029	-11.4285
	38.5	566.191	29.3895	-11.2941
	38.6	566.484	29.2774	-11.164
	38.7	566.775	29.1667	-11.039
	38.8	567.066	29.0573	-10.92
	38.9	567.356	28.9491	-10.8075
	39	567.644	28.8421	-10.7022
	39.1	567.931	28.7361	-10.6047
	39.2	568.217	28.6311	-10.5157
	39.3	568.503	28.5269	-10.4359
	39.4	568.787	28.4235	-10.3657
	39.5	569.07	28.3208	-10.3058
	39.6	569.352	28.2186	-10.2562
	39.7	569.634	28.1169	-10.2165
	39.8	569.915	28.0156	-10.1863
	39.9	570.194	27.9144	-10.1648
	40	570.473	27.8134	-10.1513
	40.1	570.751	27.7124	-10.1449
	40.2	571.028	27.6113	-10.1443
	40.3	571.304	27.5101	-10.1483
	40.4	571.579	27.4087	-10.1556
	40.5	571.853	27.3071	-10.1648
	40.6	572.126	27.2054	-10.1743
	40.7	572.398	27.1034	-10.1823
	40.8	572.669	27.0013	-10.1877
	40.9	572.939	26.8991	-10.1894
	41	573.207	26.7969	-10.1863
	41.1	573.475	26.6946	-10.1775
	41.2	573.741	26.5925	-10.1622
	41.3	574.006	26.4905	-10.1398
	41.4	574.27	26.3888	-10.1099
	41.5	574.534	26.2874	-10.072
	41.6	574.796	26.1864	-10.0256
	41.7	575.057	26.0858	-9.97044
	41.8	575.318	25.9859	-9.90674
	41.9	575.577	25.8866	-9.8348
	42	575.835	25.7881	-9.75487
	42.1	576.092	25.6905	-9.6676
	42.2	576.348	25.5938	-9.57401
	42.3	576.602	25.4982	-9.47531
	42.4	576.856	25.4037	-9.37299
	42.5	577.108	25.3103	-9.26835
	42.6	577.36	25.2182	-9.16252
	42.7	577.61	25.1273	-9.05704
	42.8	577.86	25.0375	-8.95382
	42.9	578.109	24.9488	-8.85389
	43	578.357	24.8611	-8.75837
	43.1	578.605	24.7744	-8.66842
	43.2	578.852	24.6886	-8.58466
	43.3	579.099	24.6036	-8.50762
	43.4	579.345	24.5193	-8.43725
	43.5	579.59	24.4357	-8.37307
	43.6	579.833	24.3527	-8.31483
	43.7	580.076	24.2701	-8.26257
	43.8	580.319	24.188	-8.21605
	43.9	580.56	24.1063	-8.17467
	44	580.8	24.025	-8.13767
	44.1	581.04	23.944	-8.10473
	44.2	581.279	23.8634	-8.07498
	44.3	581.517	23.7829	-8.04738
	44.4	581.755	23.7027	-8.02118
	44.5	581.992	23.6227	-7.9953
	44.6	582.228	23.5428	-7.96926
	44.7	582.463	23.4631	-7.94286
	44.8	582.698	23.3837	-7.91535
	44.9	582.932	23.3044	-7.88559
	45	583.164	23.2255	-7.85308
	45.1	583.396	23.1469	-7.81729
	45.2	583.627	23.0687	-7.77788
	45.3	583.856	22.9909	-7.73482
	45.4	584.085	22.9135	-7.6883
	45.5	584.313	22.8366	-7.63896
	45.6	584.54	22.7603	-7.58756
	45.7	584.768	22.6846	-7.53476
	45.8	584.994	22.6095	-7.48077
	45.9	585.219	22.535	-7.42588
	46	585.444	22.4611	-7.37079
	46.1	585.668	22.3878	-7.31639
	46.2	585.89	22.315	-7.26323
	46.3	586.112	22.2427	-7.21226
	46.4	586.335	22.171	-7.16403
	46.5	586.556	22.0998	-7.11858
	46.6	586.776	22.029	-7.07617
	46.7	586.996	21.9587	-7.03644
	46.8	587.215	21.8887	-6.99868
	46.9	587.434	21.8191	-6.96267
	47	587.652	21.7498	-6.92847
	47.1	587.869	21.6807	-6.89587
	47.2	588.086	21.6119	-6.86451
	47.3	588.302	21.5434	-6.83379
	47.4	588.517	21.4751	-6.80307
	47.5	588.731	21.4072	-6.77166
	47.6	588.945	21.3396	-6.73902
	47.7	589.158	21.2723	-6.70461
	47.8	589.37	21.2053	-6.66802
	47.9	589.581	21.1386	-6.62924
	48	589.792	21.0724	-6.5883
	48.1	590.002	21.0065	-6.54487
	48.2	590.212	20.9411	-6.49852
	48.3	590.421	20.8762	-6.44881
	48.4	590.63	20.8118	-6.39541
	48.5	590.837	20.7479	-6.33861
	48.6	591.045	20.6846	-6.2789
	48.7	591.251	20.6218	-6.21658
	48.8	591.456	20.5598	-6.1524
	48.9	591.661	20.4984	-6.08746
	49	591.865	20.4378	-6.02259
	49.1	592.069	20.378	-5.95853
	49.2	592.271	20.3189	-5.89625
	49.3	592.473	20.2605	-5.83709
	49.4	592.674	20.2028	-5.7824
	49.5	592.876	20.1457	-5.73342
	49.6	593.077	20.0891	-5.69112
	49.7	593.277	20.0329	-5.65593
	49.8	593.477	19.977	-5.62832
	49.9	593.677	19.9214	-5.60863
	50	593.876	19.8659	-5.5968
	50.1	594.074	19.8104	-5.59282
	50.2	594.272	19.7549	-5.5967
	50.3	594.47	19.6993	-5.60843
	50.4	594.666	19.6435	-5.62798
	50.5	594.863	19.5875	-5.65475
	50.6	595.058	19.5312	-5.68774
	50.7	595.253	19.4746	-5.72607
	50.8	595.448	19.4175	-5.76914
	50.9	595.642	19.3599	-5.81598
	51	595.836	19.3016	-5.86539
	51.1	596.029	19.2428	-5.91629
	51.2	596.222	19.1834	-5.96746
	51.3	596.415	19.1233	-6.01743
	51.4	596.607	19.0626	-6.06454
	51.5	596.798	19.0014	-6.10734
	51.6	596.988	18.9397	-6.14455
	51.7	597.178	18.8775	-6.17543
	51.8	597.366	18.8151	-6.19971
	51.9	597.554	18.7525	-6.21725
	52	597.741	18.6897	-6.2277
	52.1	597.927	18.627	-6.23114
	52.2	598.112	18.5643	-6.22765
	52.3	598.297	18.5018	-6.21749
	52.4	598.482	18.4394	-6.20111
	52.5	598.666	18.3772	-6.179
	52.6	598.849	18.3153	-6.15209
	52.7	599.032	18.2536	-6.1214
	52.8	599.214	18.1923	-6.0877
	52.9	599.395	18.1315	-6.05145
	53	599.576	18.071	-6.01337
	53.1	599.756	18.011	-5.97416
	53.2	599.935	17.9515	-5.93475
	53.3	600.113	17.8924	-5.89623
	53.4	600.291	17.8338	-5.85972
	53.5	600.468	17.7756	-5.8261
	53.6	600.645	17.7178	-5.7959
	53.7	600.822	17.6603	-5.76953
	53.8	600.999	17.6031	-5.74688
	53.9	601.176	17.5461	-5.7275
	54	601.351	17.4892	-5.71092
	54.1	601.526	17.4323	-5.69704
	54.2	601.701	17.3755	-5.68543
	54.3	601.875	17.3186	-5.67561
	54.4	602.048	17.2618	-5.66687
	54.5	602.221	17.2051	-5.65825
	54.6	602.392	17.1485	-5.6491
	54.7	602.563	17.0919	-5.63878
	54.8	602.733	17.0355	-5.62672
	54.9	602.903	16.9792	-5.61275
	55	603.072	16.9231	-5.59704
	55.1	603.241	16.8671	-5.57952
	55.2	603.409	16.8113	-5.5601
	55.3	603.577	16.7557	-5.53832
	55.4	603.745	16.7003	-5.51344
	55.5	603.912	16.6451	-5.4851
	55.6	604.078	16.5902	-5.45314
	55.7	604.244	16.5356	-5.4178
	55.8	604.408	16.4812	-5.37914
	55.9	604.572	16.4273	-5.33755
	56	604.736	16.3739	-5.29377
	56.1	604.899	16.321	-5.24805
	56.2	605.061	16.2687	-5.20053
	56.3	605.223	16.217	-5.1516
	56.4	605.384	16.1658	-5.10187
	56.5	605.545	16.1152	-5.05212
	56.6	605.706	16.065	-5.0034
	56.7	605.866	16.0153	-4.95612
	56.8	606.026	15.9661	-4.91058
	56.9	606.186	15.9174	-4.86701
	57	606.345	15.869	-4.82537
	57.1	606.504	15.8211	-4.78529
	57.2	606.662	15.7735	-4.74652
	57.3	606.819	15.7263	-4.70928
	57.4	606.976	15.6794	-4.67394
	57.5	607.132	15.6329	-4.64112
	57.6	607.288	15.5867	-4.61083
	57.7	607.443	15.5409	-4.58308
	57.8	607.598	15.4954	-4.55766
	57.9	607.752	15.4502	-4.53484
	58	607.906	15.4053	-4.51457
	58.1	608.06	15.3604	-4.49648
	58.2	608.213	15.3157	-4.48075
	58.3	608.366	15.2711	-4.46761
	58.4	608.519	15.2266	-4.45704
	58.5	608.671	15.1821	-4.44859
	58.6	608.823	15.1377	-4.44152
	58.7	608.975	15.0933	-4.43485
	58.8	609.125	15.049	-4.42846
	58.9	609.275	15.0048	-4.42213
	59	609.425	14.9606	-4.41555
	59.1	609.574	14.9164	-4.40838
	59.2	609.723	14.8723	-4.40063
	59.3	609.872	14.8283	-4.39252
	59.4	610.02	14.7843	-4.38364
	59.5	610.168	14.7405	-4.37352
	59.6	610.315	14.6967	-4.36155
	59.7	610.462	14.6531	-4.34796
	59.8	610.609	14.6096	-4.33315
	59.9	610.755	14.5662	-4.31753
	60	610.9	14.523	-4.30103
	60.1	611.044	14.48	-4.28389
	60.2	611.188	14.4372	-4.26677
	60.3	611.332	14.3946	-4.25001
	60.4	611.476	14.3523	-4.23367
	60.5	611.619	14.3102	-4.21781
	60.6	611.761	14.2682	-4.20276
	60.7	611.903	14.2264	-4.18938
	60.8	612.045	14.1847	-4.17865
	60.9	612.187	14.1431	-4.17058
	61	612.328	14.1016	-4.16523
	61.1	612.469	14.0601	-4.16291
	61.2	612.61	14.0187	-4.16384
	61.3	612.75	13.9773	-4.16775
	61.4	612.889	13.9358	-4.17401
	61.5	613.027	13.8942	-4.18221
	61.6	613.166	13.8525	-4.19219
	61.7	613.304	13.8106	-4.20389
	61.8	613.443	13.7685	-4.21668
	61.9	613.581	13.7263	-4.22931
	62	613.718	13.6838	-4.24074
	62.1	613.856	13.6412	-4.25012
	62.2	613.993	13.5985	-4.25658
	62.3	614.129	13.5556	-4.25875
	62.4	614.265	13.5127	-4.2556
	62.5	614.4	13.4697	-4.24669
	62.6	614.534	13.4269	-4.23192
	62.7	614.668	13.3842	-4.21141
	62.8	614.802	13.3417	-4.18491
	62.9	614.935	13.2995	-4.15214
	63	615.067	13.2579	-4.11357
	63.1	615.199	13.2167	-4.06991
	63.2	615.331	13.176	-4.02147
	63.3	615.462	13.1359	-3.96913
	63.4	615.592	13.0963	-3.91398
	63.5	615.723	13.0574	-3.85761
	63.6	615.852	13.0191	-3.80163
	63.7	615.982	12.9814	-3.74731
	63.8	616.111	12.9443	-3.69568
	63.9	616.24	12.9079	-3.64756
	64	616.368	12.872	-3.60419
	64.1	616.495	12.8366	-3.56657
	64.2	616.623	12.8017	-3.53561
	64.3	616.75	12.767	-3.51191
	64.4	616.877	12.7325	-3.49649
	64.5	617.004	12.6982	-3.48986
	64.6	617.131	12.6638	-3.49195
	64.7	617.258	12.6294	-3.50219
	64.8	617.385	12.5948	-3.51948
	64.9	617.511	12.5599	-3.54261
	65	617.638	12.5247	-3.57046
	65.1	617.763	12.4891	-3.60185
	65.2	617.889	12.453	-3.6353
	65.3	618.014	12.4164	-3.66982
	65.4	618.138	12.3793	-3.70385
	65.5	618.262	12.3419	-3.73619
	65.6	618.386	12.3041	-3.76517
	65.7	618.51	12.2659	-3.78915
	65.8	618.633	12.2276	-3.80676
	65.9	618.755	12.189	-3.81715
	66	618.877	12.1503	-3.8203
	66.1	618.998	12.1116	-3.81634
	66.2	619.119	12.0729	-3.80567
	66.3	619.239	12.0344	-3.78868
	66.4	619.359	11.9962	-3.76634
	66.5	619.479	11.9583	-3.73923
	66.6	619.597	11.9209	-3.70829
	66.7	619.715	11.8839	-3.67468
	66.8	619.833	11.8474	-3.63996
	66.9	619.95	11.8113	-3.606
	67	620.067	11.7756	-3.57489
	67.1	620.184	11.7403	-3.5484
	67.2	620.301	11.7053	-3.52772
	67.3	620.417	11.6706	-3.51411
	67.4	620.533	11.6361	-3.50829
	67.5	620.65	11.6017	-3.51122
	67.6	620.766	11.5672	-3.52312
	67.7	620.881	11.5325	-3.54436
	67.8	620.996	11.4976	-3.57538
	67.9	621.111	11.4622	-3.61631
	68	621.226	11.4264	-3.66675
	68.1	621.341	11.39	-3.7254
	68.2	621.456	11.3528	-3.79088
	68.3	621.57	11.315	-3.86153
	68.4	621.684	11.2763	-3.9356
	68.5	621.797	11.2367	-4.01091
	68.6	621.911	11.1961	-4.08555
	68.7	622.024	11.1546	-4.15758
	68.8	622.136	11.1123	-4.22523
	68.9	622.248	11.0691	-4.28674
	69	622.36	11.0253	-4.34015
	69.1	622.47	10.9809	-4.38368
	69.2	622.579	10.9361	-4.41604
	69.3	622.688	10.891	-4.43669
	69.4	622.797	10.8458	-4.445
	69.5	622.905	10.8006	-4.44083
	69.6	623.011	10.7555	-4.42411
	69.7	623.118	10.7106	-4.39548
	69.8	623.225	10.6662	-4.35564
	69.9	623.331	10.6222	-4.30499
	70	623.437	10.5789	-4.244
	70.1	623.542	10.5362	-4.17348
	70.2	623.647	10.4944	-4.09487
	70.3	623.751	10.4535	-4.00925
	70.4	623.855	10.4134	-3.91795
	70.5	623.957	10.3744	-3.82247
	70.6	624.06	10.3365	-3.72467
	70.7	624.162	10.2997	-3.62617
	70.8	624.264	10.2641	-3.52848
	70.9	624.365	10.2295	-3.4327
	71	624.467	10.196	-3.33979
	71.1	624.568	10.1635	-3.25107
	71.2	624.669	10.1319	-3.16776
	71.3	624.771	10.1011	-3.09057
	71.4	624.872	10.071	-3.01966
	71.5	624.972	10.0415	-2.95537
	71.6	625.073	10.0127	-2.89767
	71.7	625.173	9.98431	-2.84623
	71.8	625.273	9.9564	-2.80029
	71.9	625.372	9.92888	-2.75904
	72	625.471	9.90172	-2.72223
	72.1	625.569	9.87487	-2.68988
	72.2	625.668	9.84829	-2.66178
	72.3	625.766	9.82197	-2.63728
	72.4	625.864	9.79587	-2.61602
	72.5	625.962	9.77	-2.59745
	72.6	626.059	9.74431	-2.58099
	72.7	626.157	9.71874	-2.56576
	72.8	626.254	9.69325	-2.55112
	72.9	626.351	9.66784	-2.53665
	73	626.447	9.64248	-2.52226
	73.1	626.544	9.61719	-2.50786
	73.2	626.64	9.592	-2.49277
	73.3	626.736	9.56698	-2.47618
	73.4	626.832	9.54216	-2.45758
	73.5	626.927	9.51757	-2.43692
	73.6	627.022	9.4932	-2.41401
	73.7	627.116	9.46906	-2.38913
	73.8	627.21	9.44518	-2.36276
	73.9	627.304	9.4216	-2.33566
	74	627.398	9.39834	-2.30866
	74.1	627.492	9.37541	-2.28197
	74.2	627.586	9.3528	-2.25561
	74.3	627.679	9.33049	-2.22998
	74.4	627.772	9.30847	-2.20584
	74.5	627.864	9.2867	-2.18396
	74.6	627.957	9.26512	-2.16528
	74.7	628.049	9.24373	-2.15056
	74.8	628.142	9.22252	-2.14074
	74.9	628.234	9.20146	-2.13651
	75	628.325	9.18048	-2.13835
	75.1	628.417	9.15952	-2.1467
	75.2	628.508	9.13851	-2.16202
	75.3	628.6	9.11734	-2.18517
	75.4	628.691	9.09591	-2.21689
	75.5	628.781	9.07411	-2.25764
	75.6	628.872	9.05187	-2.30768
	75.7	628.962	9.02909	-2.36684
	75.8	629.053	9.00568	-2.43468
	75.9	629.144	8.98151	-2.51065
	76	629.234	8.9565	-2.59394
	76.1	629.323	8.93054	-2.68362
	76.2	629.413	8.90356	-2.77901
	76.3	629.502	8.8755	-2.87924
	76.4	629.592	8.84635	-2.98268
	76.5	629.681	8.81606	-3.08706
	76.6	629.77	8.78463	-3.18999
	76.7	629.858	8.75208	-3.28442
	76.8	629.947	8.71839	-3.37704
	76.9	630.034	8.68359	-3.46635
	77	630.122	8.64776	-3.55015
	77.1	630.21	8.61106	-3.62592
	77.2	630.296	8.5737	-3.69078
	77.3	630.383	8.53641	-3.74222
	77.4	630.468	8.49831	-3.77606
	77.5	630.553	8.45954	-3.78545
	77.6	630.637	8.42033	-3.75497
	77.7	630.721	8.38095	-3.63058
	77.8	630.805	8.34174	-3.6292
	77.9	630.888	8.30301	-3.61718
	78	630.971	8.26526	-3.58064
	78.1	631.053	8.22933	-3.51248
	78.2	631.134	8.19716	-3.41045
	78.3	631.215	8.17539	-3.28846
	78.4	631.295	8.1382	-3.0879
	78.5	631.375	8.10235	-2.76481
	78.6	631.454	8.06864	-2.18904
	78.7	631.533	8.03804	-0.79214
	78.8	631.611	8.01107
	78.9	631.692	7.98634
	79	631.771	7.97119
	79.1	631.849	7.97124
	79.2	631.927	8.00258
	79.3	632.005	8.13427
	79.4	632.082
	79.5	632.159
	79.6	632.237
	79.7	632.317
	79.8	632.399
	79.9	632.51
	80

## Sheet: 5c
Native PIII
		Normalised data	1st derivative	2nd derivative
	0
	0.1
	0.2
	0.3
	0.4
	0.5
	0.6
	0.7
	0.8
	0.9
	1
	1.1
	1.2
	1.3
	1.4
	1.5
	1.6
	1.7
	1.8
	1.9
	2
	2.1
	2.2
	2.3
	2.4
	2.5
	2.6
	2.7
	2.8
	2.9
	3
	3.1
	3.2
	3.3
	3.4
	3.5
	3.6
	3.7
	3.8
	3.9
	4
	4.1
	4.2
	4.3
	4.4
	4.5
	4.6
	4.7
	4.8
	4.9
	5
	5.1
	5.2
	5.3
	5.4
	5.5
	5.6
	5.7
	5.8
	5.9
	6
	6.1
	6.2
	6.3
	6.4
	6.5
	6.6
	6.7
	6.8
	6.9
	7
	7.1	384.879
	7.2	384.848
	7.3	384.83
	7.4	384.824
	7.5	384.819
	7.6	384.813
	7.7	384.81	-0.45389
	7.8	384.808	-0.21372
	7.9	384.809	-0.04088
	8	384.813	0.114677
	8.1	384.82	0.267673
	8.2	384.821	0.418808
	8.3	384.825	0.567753	15.1587
	8.4	384.83	0.711748	14.1456
	8.5	384.838	0.850061	13.6431
	8.6	384.847	0.981572	13.2301
	8.7	384.856	1.10499	12.7803
	8.8	384.868	1.24028	12.2785
	8.9	384.881	1.36516	11.7187
	9	384.896	1.48375	11.1169
	9.1	384.914	1.59629	10.4737
	9.2	384.933	1.70228	9.79435
	9.3	384.953	1.80131	9.08095
	9.4	384.976	1.89223	8.16571
	9.5	385	1.974	7.23138
	9.6	385.026	2.04578	6.23994
	9.7	385.052	2.1069	5.18637
	9.8	385.079	2.15689	4.07273
	9.9	385.107	2.19471	2.90098
	10	385.135	2.22016	1.67991
	10.1	385.164	2.23292	0.418252
	10.2	385.193	2.23254	-0.87629
	10.3	385.222	2.21866	-2.1963
	10.4	385.252	2.19101	-3.53376
	10.5	385.281	2.14943	-4.87482
	10.6	385.31	2.09382	-6.21213
	10.7	385.339	2.02419	-7.53599
	10.8	385.366	1.94063	-8.83498
	10.9	385.393	1.84335	-10.0977
	11	385.419	1.73284	-11.3134
	11.1	385.443	1.60973	-12.4709
	11.2	385.465	1.4747	-13.5597
	11.3	385.485	1.3286	-14.5697
	11.4	385.502	1.17234	-15.4912
	11.5	385.518	1.00693	-16.3154
	11.6	385.53	0.833409	-17.0358
	11.7	385.54	0.652925	-17.647
	11.8	385.548	0.466655	-18.1443
	11.9	385.553	0.27582	-18.5242
	12	385.556	0.081683	-18.7836
	12.1	385.556	-0.1145	-18.9207
	12.2	385.555	-0.31146	-18.9345
	12.3	385.55	-0.50792	-18.825
	12.4	385.543	-0.70261	-18.5932
	12.5	385.533	-0.8943	-18.2415
	12.6	385.521	-1.08169	-17.7736
	12.7	385.506	-1.26356	-17.1938
	12.8	385.489	-1.43873	-16.5075
	12.9	385.469	-1.60607	-15.7206
	13	385.447	-1.76452	-14.8399
	13.1	385.422	-1.91316	-13.8726
	13.2	385.396	-2.05115	-12.8269
	13.3	385.368	-2.17776	-11.7116
	13.4	385.339	-2.29235	-10.5359
	13.5	385.309	-2.39439	-9.30927
	13.6	385.278	-2.4834	-8.04142
	13.7	385.247	-2.559	-6.74178
	13.8	385.214	-2.62092	-5.41943
	13.9	385.181	-2.66896	-4.08351
	14	385.147	-2.70304	-2.74294
	14.1	385.112	-2.72318	-1.40678
	14.2	385.078	-2.72949	-0.08401
	14.3	385.043	-2.72217	1.21646
	14.4	385.008	-2.70149	2.48623
	14.5	384.975	-2.66778	3.71732
	14.6	384.943	-2.62151	4.90263
	14.7	384.911	-2.5632	6.03585
	14.8	384.881	-2.49348	7.11119
	14.9	384.852	-2.41303	8.12352
	15	384.824	-2.32257	9.06802
	15.1	384.798	-2.22288	9.94022
	15.2	384.773	-2.11472	10.7363
	15.3	384.749	-1.99888	11.4534
	15.4	384.727	-1.87615	12.0891
	15.5	384.706	-1.74735	12.6419
	15.6	384.687	-1.61332	13.1105
	15.7	384.67	-1.47496	13.4948
	15.8	384.654	-1.33315	13.7946
	15.9	384.64	-1.1888	14.01
	16	384.628	-1.04279	14.1415
	16.1	384.618	-0.896	14.1906
	16.2	384.611	-0.74931	14.1593
	16.3	384.606	-0.6035	14.0508
	16.4	384.602	-0.45937	13.8689
	16.5	384.601	-0.31769	13.6176
	16.6	384.6	-0.17917	13.3015
	16.7	384.601	-0.04448	12.9253
	16.8	384.604	0.085793	12.494
	16.9	384.608	0.211142	12.0126
	17	384.613	0.331113	11.4864
	17.1	384.62	0.44531	10.9214
	17.2	384.629	0.553389	10.3242
	17.3	384.638	0.655033	9.70107
	17.4	384.649	0.749976	9.05829
	17.5	384.661	0.83801	8.40189
	17.6	384.674	0.918996	7.73787
	17.7	384.687	0.992888	7.07212
	17.8	384.702	1.05974	6.41021
	17.9	384.718	1.11965	5.75777
	18	384.733	1.17279	5.12044
	18.1	384.749	1.21937	4.50349
	18.2	384.764	1.25966	3.91156
	18.3	384.78	1.29397	3.34841
	18.4	384.796	1.32261	2.81671
	18.5	384.811	1.34597	2.31867
	18.6	384.826	1.36443	1.85602
	18.7	384.842	1.37843	1.42992
	18.8	384.857	1.38838	1.04113
	18.9	384.872	1.3947	0.689939
	19	384.887	1.39774	0.376306
	19.1	384.902	1.39789	0.099632
	19.2	384.916	1.39551	-0.14157
	19.3	384.93	1.39096	-0.34944
	19.4	384.944	1.38459	-0.52627
	19.5	384.958	1.37676	-0.67435
	19.6	384.971	1.36777	-0.79563
	19.7	384.985	1.35792	-0.89218
	19.8	384.998	1.34744	-0.96589
	19.9	385.01	1.33649	-1.01849
	20	385.023	1.32523	-1.05183
	20.1	385.036	1.31377	-1.06787
	20.2	385.049	1.30227	-1.06829
	20.3	385.062	1.29083	-1.05456
	20.4	385.076	1.2796	-1.02764
	20.5	385.089	1.26874	-0.98773
	20.6	385.102	1.25837	-0.93495
	20.7	385.115	1.24861	-0.86934
	20.8	385.127	1.23958	-0.79101
	20.9	385.139	1.23137	-0.70013
	21	385.151	1.22412	-0.59711
	21.1	385.162	1.21797	-0.48233
	21.2	385.173	1.21304	-0.35605
	21.3	385.185	1.20945	-0.21799
	21.4	385.197	1.20734	-0.06758
	21.5	385.209	1.20681	0.095897
	21.6	385.221	1.20795	0.273177
	21.7	385.233	1.21086	0.464481
	21.8	385.244	1.21565	0.670071
	21.9	385.256	1.22245	0.889793
	22	385.267	1.23147	1.12339
	22.1	385.278	1.24288	1.3707
	22.2	385.289	1.2569	1.63186
	22.3	385.299	1.27371	1.90691
	22.4	385.31	1.29344	2.19607
	22.5	385.321	1.31623	2.49952
	22.6	385.331	1.34215	2.8174
	22.7	385.342	1.3713	3.15014
	22.8	385.354	1.40377	3.49879
	22.9	385.367	1.43969	3.86541
	23	385.381	1.47917	4.25287
	23.1	385.396	1.5224	4.66554
	23.2	385.411	1.56955	5.10872
	23.3	385.427	1.6209	5.58853
	23.4	385.442	1.67676	6.11163
	23.5	385.458	1.73755	6.68559
	23.6	385.474	1.80379	7.31864
	23.7	385.491	1.87609	8.01983
	23.8	385.507	1.9552	8.79919
	23.9	385.525	2.04192	9.66749
	24	385.543	2.13717	10.6366
	24.1	385.561	2.24196	11.719
	24.2	385.581	2.35741	12.9279
	24.3	385.602	2.48478	14.2768
	24.4	385.623	2.62546	15.7796
	24.5	385.646	2.781	17.4506
	24.6	385.67	2.95315	19.3048
	24.7	385.695	3.14384	21.3566
	24.8	385.721	3.35514	23.6207
	24.9	385.748	3.58931	26.1104
	25	385.776	3.84874	28.838
	25.1	385.805	4.13599	31.8144
	25.2	385.836	4.45374	35.0481
	25.3	385.869	4.80476	38.5451
	25.4	385.904	5.19189	42.309
	25.5	385.942	5.61802	46.341
	25.6	385.982	6.08601	50.6386
	25.7	386.026	6.59873	55.196
	25.8	386.073	7.15892	60.0037
	25.9	386.125	7.76924	65.0484
	26	386.182	8.43223	70.3126
	26.1	386.244	9.15023	75.7748
	26.2	386.313	9.92537	81.4094
	26.3	386.387	10.7595	87.1861
	26.4	386.469	11.6542	93.0711
	26.5	386.559	12.6106	99.0261
	26.6	386.658	13.6294	105.009
	26.7	386.766	14.711	110.973
	26.8	386.885	15.8551	116.87
	26.9	387.016	17.0611	122.646
	27	387.158	18.3274	128.248
	27.1	387.314	19.6524	133.619
	27.2	387.485	21.0333	138.703
	27.3	387.672	22.467	143.444
	27.4	387.875	23.9497	147.785
	27.5	388.095	25.477	151.672
	27.6	388.332	27.0439	155.054
	27.7	388.589	28.6449	157.883
	27.8	388.866	30.2738	160.115
	27.9	389.163	31.9242	161.71
	28	389.481	33.5893	162.637
	28.1	389.82	35.2617	162.868
	28.2	390.179	36.934	162.382
	28.3	390.56	38.5984	161.168
	28.4	390.962	40.2471	159.218
	28.5	391.385	41.8723	156.536
	28.6	391.829	43.4662	153.131
	28.7	392.294	45.0211	149.021
	28.8	392.778	46.5298	144.231
	28.9	393.282	47.985	138.794
	29	393.803	49.38	132.75
	29.1	394.342	50.7086	126.146
	29.2	394.897	51.965	119.032
	29.3	395.467	53.1442	111.468
	29.4	396.05	54.2417	103.512
	29.5	396.646	55.2536	95.2316
	29.6	397.253	56.1771	86.6923
	29.7	397.87	57.0097	77.9627
	29.8	398.495	57.7501	69.1121
	29.9	399.126	58.3973	60.2088
	30	399.762	58.9513	51.3192
	30.1	400.402	59.4128	42.5077
	30.2	401.045	59.7831	33.8353
	30.3	401.689	60.0641	25.3593
	30.4	402.333	60.2585	17.1322
	30.5	402.976	60.3693	9.20209
	30.6	403.617	60.4	1.61135
	30.7	404.256	60.3546	-5.60329
	30.8	404.89	60.2373	-12.4111
	30.9	405.521	60.0528	-18.7873
	31	406.146	59.8059	-24.7134
	31.1	406.765	59.5015	-30.1766
	31.2	407.378	59.1446	-35.17
	31.3	407.984	58.7404	-39.6922
	31.4	408.584	58.2937	-43.747
	31.5	409.175	57.8096	-47.3425
	31.6	409.759	57.2929	-50.4919
	31.7	410.336	56.7481	-53.212
	31.8	410.905	56.1796	-55.5226
	31.9	411.467	55.5915	-57.4461
	32	412.021	54.9877	-59.0071
	32.1	412.568	54.3718	-60.2316
	32.2	413.107	53.7469	-61.1466
	32.3	413.639	53.1161	-61.7795
	32.4	414.165	52.4819	-62.1579
	32.5	414.683	51.8468	-62.3089
	32.6	415.194	51.2129	-62.259
	32.7	415.699	50.5819	-62.0338
	32.8	416.197	49.9553	-61.657
	32.9	416.688	49.3345	-61.1511
	33	417.173	48.7206	-60.5369
	33.1	417.652	48.1144	-59.8339
	33.2	418.125	47.5166	-59.0596
	33.3	418.593	46.9277	-58.2296
	33.4	419.055	46.3481	-57.3577
	33.5	419.511	45.7779	-56.4562
	33.6	419.962	45.2175	-55.5355
	33.7	420.407	44.6668	-54.6039
	33.8	420.847	44.1257	-53.6685
	33.9	421.282	43.5943	-52.7349
	34	421.711	43.0724	-51.8082
	34.1	422.135	42.5598	-50.8921
	34.2	422.555	42.0564	-49.9895
	34.3	422.969	41.562	-49.1022
	34.4	423.379	41.0764	-48.2316
	34.5	423.784	40.5995	-47.3785
	34.6	424.184	40.1311	-46.5435
	34.7	424.58	39.6709	-45.7263
	34.8	424.971	39.2188	-44.9268
	34.9	425.357	38.7745	-44.1454
	35	425.739	38.3379	-43.3823
	35.1	426.118	37.9089	-42.6373
	35.2	426.491	37.4871	-41.9101
	35.3	426.861	37.0726	-41.2002
	35.4	427.227	36.6651	-40.5074
	35.5	427.588	36.2645	-39.8316
	35.6	427.946	35.8705	-39.1723
	35.7	428.3	35.483	-38.5291
	35.8	428.649	35.1019	-37.9021
	35.9	428.996	34.7269	-37.2913
	36	429.339	34.3579	-36.6964
	36.1	429.679	33.9947	-36.1169
	36.2	430.015	33.6373	-35.5522
	36.3	430.347	33.2854	-35.002
	36.4	430.676	32.9389	-34.4661
	36.5	431.002	32.5977	-33.9444
	36.6	431.324	32.2616	-33.4361
	36.7	431.643	31.9305	-32.9411
	36.8	431.958	31.6043	-32.4595
	36.9	432.271	31.2828	-31.991
	37	432.58	30.9659	-31.5351
	37.1	432.887	30.6535	-31.0911
	37.2	433.19	30.3455	-30.6588
	37.3	433.49	30.0418	-30.2379
	37.4	433.788	29.7421	-29.8282
	37.5	434.082	29.4464	-29.4291
	37.6	434.374	29.1547	-29.0401
	37.7	434.662	28.8667	-28.661
	37.8	434.948	28.5825	-28.2919
	37.9	435.231	28.3019	-27.9328
	38	435.51	28.0249	-27.5833
	38.1	435.787	27.7513	-27.2436
	38.2	436.062	27.4811	-26.9141
	38.3	436.334	27.2142	-26.5949
	38.4	436.603	26.9505	-26.2858
	38.5	436.87	26.6898	-25.9866
	38.6	437.134	26.4321	-25.6973
	38.7	437.396	26.1772	-25.4178
	38.8	437.656	25.925	-25.1481
	38.9	437.913	25.6754	-24.8873
	39	438.168	25.4282	-24.6348
	39.1	438.42	25.1835	-24.3899
	39.2	438.67	24.9412	-24.1517
	39.3	438.918	24.7012	-23.919
	39.4	439.163	24.4634	-23.6906
	39.5	439.405	24.2278	-23.4656
	39.6	439.645	23.9943	-23.2435
	39.7	439.882	23.763	-23.0237
	39.8	440.118	23.5339	-22.8052
	39.9	440.352	23.3069	-22.5872
	40	440.583	23.0821	-22.3685
	40.1	440.812	22.8595	-22.1485
	40.2	441.039	22.639	-21.9259
	40.3	441.264	22.4207	-21.6999
	40.4	441.486	22.2046	-21.4697
	40.5	441.706	21.9907	-21.2353
	40.6	441.924	21.7791	-20.9963
	40.7	442.14	21.5699	-20.7527
	40.8	442.354	21.3632	-20.5039
	40.9	442.565	21.1591	-20.25
	41	442.775	20.9576	-19.9912
	41.1	442.982	20.7587	-19.7281
	41.2	443.187	20.5626	-19.4615
	41.3	443.39	20.3692	-19.1926
	41.4	443.591	20.1785	-18.9229
	41.5	443.79	19.9907	-18.6543
	41.6	443.988	19.8056	-18.3883
	41.7	444.184	19.6233	-18.1258
	41.8	444.377	19.4438	-17.8679
	41.9	444.57	19.2668	-17.6159
	42	444.76	19.0925	-17.3709
	42.1	444.949	18.9205	-17.1341
	42.2	445.136	18.751	-16.9069
	42.3	445.322	18.5836	-16.6905
	42.4	445.506	18.4184	-16.4858
	42.5	445.688	18.2553	-16.2937
	42.6	445.87	18.094	-16.114
	42.7	446.049	17.9346	-15.947
	42.8	446.227	17.7768	-15.7924
	42.9	446.403	17.6205	-15.6504
	43	446.578	17.4655	-15.5211
	43.1	446.751	17.3116	-15.4043
	43.2	446.923	17.1588	-15.2999
	43.3	447.094	17.0069	-15.207
	43.4	447.263	16.8559	-15.1246
	43.5	447.431	16.7056	-15.0511
	43.6	447.598	16.5559	-14.9847
	43.7	447.762	16.4067	-14.9236
	43.8	447.926	16.2581	-14.8667
	43.9	448.088	16.1098	-14.8128
	44	448.248	15.9619	-14.7604
	44.1	448.407	15.8143	-14.7084
	44.2	448.565	15.6673	-14.6553
	44.3	448.721	15.5208	-14.5995
	44.4	448.875	15.3748	-14.5393
	44.5	449.028	15.2294	-14.4735
	44.6	449.18	15.0846	-14.4013
	44.7	449.329	14.9406	-14.3222
	44.8	449.477	14.7973	-14.2365
	44.9	449.624	14.6548	-14.1441
	45	449.769	14.5133	-14.0448
	45.1	449.913	14.3729	-13.9385
	45.2	450.056	14.2337	-13.8251
	45.3	450.197	14.0957	-13.7042
	45.4	450.337	13.9589	-13.5762
	45.5	450.475	13.8235	-13.4418
	45.6	450.611	13.6894	-13.3021
	45.7	450.747	13.5568	-13.1583
	45.8	450.881	13.4256	-13.0113
	45.9	451.014	13.2961	-12.8619
	46	451.146	13.1681	-12.7107
	46.1	451.276	13.0418	-12.5584
	46.2	451.405	12.9171	-12.4059
	46.3	451.532	12.794	-12.2543
	46.4	451.658	12.6723	-12.1049
	46.5	451.784	12.5523	-11.9593
	46.6	451.908	12.4336	-11.8185
	46.7	452.031	12.3165	-11.6832
	46.8	452.153	12.2007	-11.5539
	46.9	452.274	12.0862	-11.4305
	47	452.394	11.973	-11.3135
	47.1	452.513	11.8609	-11.2029
	47.2	452.63	11.7499	-11.0991
	47.3	452.747	11.6398	-11.0025
	47.4	452.862	11.5306	-10.9134
	47.5	452.977	11.4223	-10.8313
	47.6	453.091	11.3147	-10.7558
	47.7	453.203	11.2079	-10.6862
	47.8	453.314	11.1017	-10.6219
	47.9	453.425	10.9962	-10.5624
	48	453.534	10.8911	-10.5072
	48.1	453.642	10.7865	-10.4559
	48.2	453.749	10.6823	-10.408
	48.3	453.855	10.5786	-10.3627
	48.4	453.96	10.4753	-10.319
	48.5	454.065	10.3723	-10.2757
	48.6	454.168	10.2698	-10.2318
	48.7	454.27	10.1676	-10.1863
	48.8	454.371	10.0658	-10.1386
	48.9	454.471	9.96438	-10.0881
	49	454.57	9.86346	-10.0341
	49.1	454.668	9.76307	-9.97577
	49.2	454.766	9.66328	-9.91259
	49.3	454.862	9.56413	-9.84394
	49.4	454.957	9.4657	-9.76941
	49.5	455.05	9.36802	-9.68878
	49.6	455.143	9.27118	-9.60242
	49.7	455.235	9.17523	-9.51074
	49.8	455.326	9.08025	-9.41412
	49.9	455.416	8.9863	-9.31277
	50	455.505	8.89344	-9.20703
	50.1	455.592	8.80173	-9.09732
	50.2	455.679	8.71117	-8.98436
	50.3	455.765	8.62178	-8.8691
	50.4	455.85	8.53358	-8.75252
	50.5	455.934	8.4466	-8.63576
	50.6	456.017	8.36085	-8.52001
	50.7	456.1	8.27634	-8.40613
	50.8	456.182	8.19305	-8.2946
	50.9	456.263	8.11094	-8.18601
	51	456.342	8.02995	-8.08086
	51.1	456.421	7.95001	-7.98007
	51.2	456.5	7.87104	-7.88433
	51.3	456.577	7.79299	-7.79423
	51.4	456.655	7.71582	-7.71003
	51.5	456.732	7.63946	-7.63165
	51.6	456.808	7.56388	-7.55882
	51.7	456.883	7.48899	-7.49082
	51.8	456.957	7.41473	-7.42698
	51.9	457.031	7.34104	-7.36697
	52	457.104	7.26785	-7.31059
	52.1	457.176	7.19514	-7.25749
	52.2	457.248	7.12289	-7.20736
	52.3	457.319	7.05111	-7.15931
	52.4	457.389	6.9798	-7.11256
	52.5	457.459	6.90895	-7.06616
	52.6	457.528	6.83855	-7.01927
	52.7	457.596	6.76856	-6.97121
	52.8	457.663	6.699	-6.92181
	52.9	457.729	6.62987	-6.87122
	53	457.795	6.56122	-6.81944
	53.1	457.86	6.4931	-6.76644
	53.2	457.924	6.42554	-6.71186
	53.3	457.988	6.3586	-6.65557
	53.4	458.051	6.29227	-6.59749
	53.5	458.113	6.22656	-6.53802
	53.6	458.173	6.16147	-6.47779
	53.7	458.234	6.09698	-6.41757
	53.8	458.294	6.03312	-6.35825
	53.9	458.354	5.9699	-6.30041
	54	458.413	5.9073	-6.24399
	54.1	458.471	5.84531	-6.18888
	54.2	458.529	5.78389	-6.13505
	54.3	458.586	5.72299	-6.08234
	54.4	458.643	5.66255	-6.03097
	54.5	458.7	5.60255	-5.98089
	54.6	458.755	5.54299	-5.93217
	54.7	458.81	5.4839	-5.88466
	54.8	458.865	5.42526	-5.83799
	54.9	458.919	5.3671	-5.79134
	55	458.973	5.30941	-5.74382
	55.1	459.026	5.25219	-5.69495
	55.2	459.078	5.19544	-5.64451
	55.3	459.129	5.13915	-5.59248
	55.4	459.18	5.08333	-5.5388
	55.5	459.231	5.02803	-5.48328
	55.6	459.281	4.97329	-5.42551
	55.7	459.33	4.91915	-5.36514
	55.8	459.379	4.86565	-5.30176
	55.9	459.427	4.8128	-5.23495
	56	459.474	4.7606	-5.16471
	56.1	459.521	4.70911	-5.09187
	56.2	459.567	4.65834	-5.01726
	56.3	459.613	4.60837	-4.94149
	56.4	459.658	4.55923	-4.8652
	56.5	459.703	4.51096	-4.78885
	56.6	459.747	4.46357	-4.71295
	56.7	459.791	4.417	-4.63807
	56.8	459.834	4.37122	-4.56481
	56.9	459.877	4.32618	-4.49378
	57	459.919	4.28183	-4.42589
	57.1	459.962	4.23813	-4.36196
	57.2	460.004	4.19505	-4.30227
	57.3	460.046	4.15254	-4.24657
	57.4	460.087	4.11057	-4.19449
	57.5	460.128	4.06912	-4.14563
	57.6	460.168	4.02812	-4.09982
	57.7	460.209	3.98752	-4.05677
	57.8	460.248	3.94729	-4.01617
	57.9	460.287	3.90741	-3.97788
	58	460.325	3.86788	-3.94187
	58.1	460.364	3.8287	-3.908
	58.2	460.402	3.78985	-3.87532
	58.3	460.44	3.75132	-3.84282
	58.4	460.478	3.71311	-3.80992
	58.5	460.515	3.67519	-3.77603
	58.6	460.551	3.63754	-3.74077
	58.7	460.588	3.60016	-3.70398
	58.8	460.623	3.56308	-3.66532
	58.9	460.659	3.52638	-3.62474
	59	460.694	3.4901	-3.58218
	59.1	460.728	3.45429	-3.53732
	59.2	460.762	3.41899	-3.48988
	59.3	460.795	3.38422	-3.4399
	59.4	460.828	3.35001	-3.38798
	59.5	460.861	3.31636	-3.33489
	59.6	460.894	3.28325	-3.28129
	59.7	460.926	3.25071	-3.22782
	59.8	460.958	3.21876	-3.17529
	59.9	460.99	3.18737	-3.12415
	60	461.021	3.15652	-3.07471
	60.1	461.053	3.1262	-3.02702
	60.2	461.084	3.09635	-2.98099
	60.3	461.114	3.06695	-2.93722
	60.4	461.145	3.03796	-2.89633
	60.5	461.175	3.00933	-2.85864
	60.6	461.204	2.98105	-2.82458
	60.7	461.234	2.95311	-2.79452
	60.8	461.263	2.92553	-2.76845
	60.9	461.293	2.89825	-2.74647
	61	461.321	2.8712	-2.72832
	61.1	461.35	2.84433	-2.71388
	61.2	461.378	2.81757	-2.70333
	61.3	461.406	2.79085	-2.69683
	61.4	461.433	2.76413	-2.69468
	61.5	461.461	2.73738	-2.69659
	61.6	461.489	2.71056	-2.70218
	61.7	461.516	2.68366	-2.71099
	61.8	461.543	2.65665	-2.72231
	61.9	461.569	2.62949	-2.73523
	62	461.595	2.60217	-2.74928
	62.1	461.621	2.57466	-2.76399
	62.2	461.647	2.54694	-2.77901
	62.3	461.672	2.51901	-2.7943
	62.4	461.697	2.4909	-2.80922
	62.5	461.722	2.46263	-2.82304
	62.6	461.747	2.43422	-2.83498
	62.7	461.771	2.4057	-2.84412
	62.8	461.796	2.37708	-2.84934
	62.9	461.819	2.34834	-2.84988
	63	461.843	2.31954	-2.84513
	63.1	461.866	2.29073	-2.83481
	63.2	461.889	2.26197	-2.81858
	63.3	461.911	2.23336	-2.79599
	63.4	461.934	2.20502	-2.76665
	63.5	461.956	2.17703	-2.72975
	63.6	461.978	2.14948	-2.68514
	63.7	461.998	2.12245	-2.63281
	63.8	462.019	2.09599	-2.57303
	63.9	462.04	2.07018	-2.50654
	64	462.06	2.04508	-2.4344
	64.1	462.08	2.02077	-2.35765
	64.2	462.099	1.99732	-2.27734
	64.3	462.119	1.97479	-2.19449
	64.4	462.138	1.95321	-2.10978
	64.5	462.157	1.93258	-2.02423
	64.6	462.175	1.91289	-1.93909
	64.7	462.193	1.89411	-1.85595
	64.8	462.211	1.8762	-1.77628
	64.9	462.229	1.85911	-1.70184
	65	462.246	1.84282	-1.63422
	65.1	462.264	1.82727	-1.57472
	65.2	462.282	1.81239	-1.52417
	65.3	462.3	1.79806	-1.48318
	65.4	462.317	1.78417	-1.45216
	65.5	462.335	1.77057	-1.43141
	65.6	462.352	1.7571	-1.42157
	65.7	462.37	1.74361	-1.42272
	65.8	462.387	1.72999	-1.43463
	65.9	462.405	1.71613	-1.45666
	66	462.423	1.70194	-1.48791
	66.1	462.44	1.68734	-1.52693
	66.2	462.458	1.67223	-1.57187
	66.3	462.476	1.65654	-1.62101
	66.4	462.493	1.64023	-1.67271
	66.5	462.51	1.62326	-1.72569
	66.6	462.526	1.60562	-1.77868
	66.7	462.543	1.58734	-1.83025
	66.8	462.559	1.56848	-1.87868
	66.9	462.575	1.54909	-1.92264
	67	462.591	1.52926	-1.96064
	67.1	462.607	1.50905	-1.99118
	67.2	462.622	1.4885	-2.01303
	67.3	462.637	1.46771	-2.02544
	67.4	462.651	1.44679	-2.0282
	67.5	462.666	1.42583	-2.02122
	67.6	462.68	1.40495	-2.0046
	67.7	462.694	1.38432	-1.97819
	67.8	462.707	1.36406	-1.94209
	67.9	462.72	1.34429	-1.89675
	68	462.733	1.32509	-1.84298
	68.1	462.745	1.30655	-1.78157
	68.2	462.757	1.28871	-1.71375
	68.3	462.769	1.27166	-1.64125
	68.4	462.781	1.25545	-1.56557
	68.5	462.793	1.2401	-1.48809
	68.6	462.804	1.22563	-1.40989
	68.7	462.816	1.21204	-1.33176
	68.8	462.828	1.1993	-1.25463
	68.9	462.839	1.18737	-1.17954
	69	462.851	1.17619	-1.10722
	69.1	462.862	1.16572	-1.03836
	69.2	462.874	1.1559	-0.97363
	69.3	462.885	1.14673	-0.91356
	69.4	462.897	1.13816	-0.85836
	69.5	462.908	1.13012	-0.80791
	69.6	462.919	1.12258	-0.76215
	69.7	462.93	1.1155	-0.72093
	69.8	462.941	1.10879	-0.68418
	69.9	462.952	1.10241	-0.65208
	70	462.963	1.0963	-0.62445
	70.1	462.974	1.09042	-0.60098
	70.2	462.985	1.08473	-0.58151
	70.3	462.996	1.0792	-0.56568
	70.4	463.007	1.0738	-0.55306
	70.5	463.018	1.06848	-0.54335
	70.6	463.028	1.06322	-0.53629
	70.7	463.039	1.058	-0.53175
	70.8	463.049	1.0528	-0.52982
	70.9	463.06	1.04762	-0.53041
	71	463.07	1.04243	-0.5334
	71.1	463.08	1.03721	-0.53869
	71.2	463.091	1.03194	-0.54624
	71.3	463.101	1.02661	-0.55608
	71.4	463.111	1.02115	-0.56818
	71.5	463.121	1.01555	-0.5825
	71.6	463.131	1.00979	-0.59888
	71.7	463.141	1.00384	-0.617
	71.8	463.151	0.997674	-0.6366
	71.9	463.162	0.991271	-0.65747
	72	463.172	0.98462	-0.67912
	72.1	463.182	0.977716	-0.70127
	72.2	463.192	0.970563	-0.72367
	72.3	463.201	0.963171	-0.74592
	72.4	463.211	0.955553	-0.76766
	72.5	463.221	0.947711	-0.78826
	72.6	463.231	0.939658	-0.80723
	72.7	463.24	0.931403	-0.82424
	72.8	463.25	0.922954	-0.83909
	72.9	463.259	0.914331	-0.85151
	73	463.269	0.905555	-0.86145
	73.1	463.278	0.89668	-0.86869
	73.2	463.287	0.887752	-0.87304
	73.3	463.296	0.878807	-0.87449
	73.4	463.305	0.869872	-0.87291
	73.5	463.313	0.860989	-0.86852
	73.6	463.322	0.852179	-0.86168
	73.7	463.329	0.843468	-0.85319
	73.8	463.337	0.834893	-0.84381
	73.9	463.345	0.826464	-0.83415
	74	463.353	0.818205	-0.82452
	74.1	463.361	0.810109	-0.81531
	74.2	463.369	0.802153	-0.80675
	74.3	463.377	0.794297	-0.79904
	74.4	463.384	0.786495	-0.79255
	74.5	463.392	0.778709	-0.78745
	74.6	463.4	0.77093	-0.78426
	74.7	463.408	0.763152	-0.78297
	74.8	463.416	0.755368	-0.78312
	74.9	463.423	0.747584	-0.78403
	75	463.431	0.739787	-0.78502
	75.1	463.438	0.73197	-0.78544
	75.2	463.445	0.724094	-0.78492
	75.3	463.453	0.716153	-0.78323
	75.4	463.46	0.708179	-0.77999
	75.5	463.467	0.700213	-0.7751
	75.6	463.475	0.692292	-0.76811
	75.7	463.482	0.684456	-0.7584
	75.8	463.489	0.67674	-0.74492
	75.9	463.496	0.669164	-0.72691
	76	463.503	0.66177	-0.70421
	76.1	463.509	0.654571	-0.67707
	76.2	463.515	0.647614	-0.64571
	76.3	463.522	0.640962	-0.61061
	76.4	463.528	0.634703	-0.57248
	76.5	463.534	0.628924	-0.53181
	76.6	463.54	0.623674	-0.48991
	76.7	463.546	0.618965	-0.44719
	76.8	463.551	0.614807	-0.40177
	76.9	463.556	0.611183	-0.35521
	77	463.562	0.608042	-0.30932
	77.1	463.567	0.605347	-0.26607
	77.2	463.573	0.602981	-0.22663
	77.3	463.578	0.600909	-0.19251
	77.4	463.584	0.599402	-0.16646
	77.5	463.59	0.598337	-0.15133
	77.6	463.596	0.597585	-0.15052
	77.7	463.601	0.596996	-0.16519
	77.8	463.607	0.596478	-0.14969
	77.9	463.613	0.595864	-0.14012
	78	463.62	0.594831	-0.14187
	78.1	463.626	0.593023	-0.1561
	78.2	463.633	0.58998	-0.18079
	78.3	463.639	0.585524	-0.21599
	78.4	463.646	0.585018	-0.2814
	78.5	463.652	0.584094	-0.38723
	78.6	463.658	0.582377	-0.55955
	78.7	463.664	0.579605	-0.79684
	78.8	463.67	0.57589
	78.9	463.675	0.571077
	79	463.682	0.56271
	79.1	463.689	0.549396
	79.2	463.695	0.527685
	79.3	463.701	0.497403
	79.4	463.707
	79.5	463.712
	79.6	463.716
	79.7	463.72
	79.8	463.721
	79.9	463.724
	80

## Sheet: 5d
recombinant PIII
		Normalised data	1st derivative	2nd derivative
	0
	0.1
	0.2
	0.3
	0.4
	0.5
	0.6
	0.7
	0.8
	0.9
	1
	1.1
	1.2
	1.3
	1.4
	1.5
	1.6
	1.7
	1.8
	1.9
	2
	2.1
	2.2
	2.3
	2.4
	2.5
	2.6
	2.7
	2.8
	2.9
	3
	3.1
	3.2
	3.3
	3.4
	3.5
	3.6
	3.7
	3.8
	3.9
	4
	4.1
	4.2
	4.3
	4.4
	4.5
	4.6
	4.7
	4.8
	4.9
	5	72.3692
	5.1	72.3818
	5.2	72.3843
	5.3	72.3855
	5.4	72.3864
	5.5	72.3869
	5.6	72.3873	0.160045
	5.7	72.3876	0.098677
	5.8	72.3875	0.073359
	5.9	72.3875	0.0585
	6	72.3874	0.048509
	6.1	72.3882	0.041578
	6.2	72.3885	0.035432	-1.24235
	6.3	72.3881	0.030625	-0.75079
	6.4	72.388	0.026959	-0.55361
	6.5	72.3879	0.024192	-0.43972
	6.6	72.3878	0.022094	-0.36388
	6.7	72.3876	0.014627	-0.31143
	6.8	72.3874	0.010964	-0.26432
	6.9	72.3873	0.008582	-0.22773
	7	72.3871	0.006925	-0.20049
	7.1	72.3869	0.005733	-0.18099
	7.2	72.3868	0.004843	-0.16482
	7.3	72.3868	0.004206	-0.10382
	7.4	72.3868	0.003714	-0.07495
	7.5	72.3869	0.003298	-0.05753
	7.6	72.3869	0.0029	-0.04716
	7.7	72.387	0.002472	-0.04186
	7.8	72.3871	0.002316	-0.04041
	7.9	72.3872	0.002168	-0.04238
	8	72.3873	0.001969	-0.04686
	8.1	72.3875	0.001679	-0.05332
	8.2	72.3876	0.001266	-0.06118
	8.3	72.3876	0.000709	-0.07004
	8.4	72.3878	-5.8e-06	-0.08231
	8.5	72.388	-0.00088	-0.0955
	8.6	72.3882	-0.00191	-0.1089
	8.7	72.3885	-0.0031	-0.12189
	8.8	72.3886	-0.00444	-0.13393
	8.9	72.3887	-0.00593	-0.14462
	9	72.3886	-0.00756	-0.15369
	9.1	72.3887	-0.00929	-0.16105
	9.2	72.3887	-0.0111	-0.16657
	9.3	72.3886	-0.01295	-0.17009
	9.4	72.3884	-0.01481	-0.17151
	9.5	72.3881	-0.01665	-0.17071
	9.6	72.3877	-0.01845	-0.16763
	9.7	72.3874	-0.0202	-0.16249
	9.8	72.3872	-0.0219	-0.15539
	9.9	72.3869	-0.02351	-0.14662
	10	72.3865	-0.02502	-0.13647
	10.1	72.3863	-0.02642	-0.12518
	10.2	72.386	-0.02768	-0.11285
	10.3	72.3857	-0.02879	-0.09954
	10.4	72.3853	-0.02975	-0.08542
	10.5	72.3848	-0.03054	-0.07076
	10.6	72.3843	-0.03118	-0.05594
	10.7	72.3836	-0.03167	-0.04124
	10.8	72.383	-0.03199	-0.02712
	10.9	72.3825	-0.03215	-0.01385
	11	72.3821	-0.03215	-0.00159
	11.1	72.3819	-0.032	0.009653
	11.2	72.3816	-0.03173	0.020072
	11.3	72.3812	-0.03137	0.02978
	11.4	72.3809	-0.03093	0.038781
	11.5	72.3807	-0.03045	0.04709
	11.6	72.3805	-0.02994	0.054841
	11.7	72.3804	-0.02938	0.062189
	11.8	72.3803	-0.02877	0.069438
	11.9	72.3802	-0.02809	0.076869
	12	72.38	-0.02734	0.084867
	12.1	72.3797	-0.0265	0.093662
	12.2	72.3793	-0.02557	0.103349
	12.3	72.3788	-0.02454	0.113817
	12.4	72.3784	-0.0234	0.124794
	12.5	72.378	-0.02214	0.136085
	12.6	72.3777	-0.02075	0.147634
	12.7	72.3774	-0.01921	0.159435
	12.8	72.3774	-0.01754	0.171447
	12.9	72.3772	-0.01573	0.183718
	13	72.3771	-0.0138	0.196059
	13.1	72.3768	-0.01176	0.208226
	13.2	72.3766	-0.00962	0.219881
	13.3	72.3765	-0.00737	0.230659
	13.4	72.3764	-0.00499	0.240264
	13.5	72.3762	-0.00249	0.248491
	13.6	72.376	0.000125	0.25522
	13.7	72.3756	0.002844	0.260251
	13.8	72.3754	0.005637	0.263225
	13.9	72.3752	0.008466	0.263799
	14	72.3751	0.011296	0.261631
	14.1	72.3752	0.014094	0.256417
	14.2	72.3754	0.016828	0.248146
	14.3	72.3757	0.019466	0.236941
	14.4	72.3762	0.021966	0.223061
	14.5	72.3768	0.02429	0.206915
	14.6	72.3774	0.026402	0.18891
	14.7	72.3779	0.028276	0.16935
	14.8	72.3785	0.029902	0.148522
	14.9	72.379	0.031277	0.126677
	15	72.3796	0.032404	0.104203
	15.1	72.3802	0.033296	0.08159
	15.2	72.3806	0.033966	0.059329
	15.3	72.381	0.034416	0.03781
	15.4	72.3814	0.034651	0.01727
	15.5	72.3819	0.034668	-0.00212
	15.6	72.3823	0.034471	-0.02027
	15.7	72.3827	0.034081	-0.0372
	15.8	72.3833	0.033521	-0.05296
	15.9	72.3838	0.032813	-0.06728
	16	72.3843	0.031975	-0.08007
	16.1	72.3846	0.031023	-0.09117
	16.2	72.3848	0.029973	-0.10058
	16.3	72.3849	0.028832	-0.10856
	16.4	72.3851	0.027611	-0.1154
	16.5	72.3851	0.026342	-0.12137
	16.6	72.3852	0.025042	-0.12674
	16.7	72.3854	0.023727	-0.13176
	16.8	72.3856	0.022401	-0.13656
	16.9	72.3858	0.021053	-0.14118
	17	72.3858	0.019674	-0.14561
	17.1	72.3859	0.018249	-0.15016
	17.2	72.3861	0.016766	-0.15501
	17.3	72.3864	0.015211	-0.16032
	17.4	72.3867	0.013585	-0.1661
	17.5	72.3869	0.011891	-0.17214
	17.6	72.3872	0.010138	-0.17827
	17.7	72.3874	0.008323	-0.1842
	17.8	72.3877	0.00644	-0.18957
	17.9	72.3879	0.004488	-0.19405
	18	72.3881	0.002469	-0.19764
	18.1	72.3881	0.000396	-0.20017
	18.2	72.3881	-0.00172	-0.20151
	18.3	72.3882	-0.00386	-0.20142
	18.4	72.3884	-0.00598	-0.19955
	18.5	72.3885	-0.00808	-0.19563
	18.6	72.3885	-0.01013	-0.18948
	18.7	72.3883	-0.01213	-0.18102
	18.8	72.388	-0.01404	-0.17028
	18.9	72.3876	-0.01585	-0.15747
	19	72.3872	-0.01751	-0.14291
	19.1	72.387	-0.01899	-0.12686
	19.2	72.3866	-0.02027	-0.10927
	19.3	72.3861	-0.02133	-0.09036
	19.4	72.3855	-0.02215	-0.07044
	19.5	72.385	-0.02275	-0.0498
	19.6	72.3846	-0.02313	-0.02888
	19.7	72.3842	-0.0233	-0.00793
	19.8	72.3839	-0.02324	0.012666
	19.9	72.3836	-0.02297	0.032588
	20	72.3834	-0.0225	0.051671
	20.1	72.3831	-0.02182	0.069975
	20.2	72.3829	-0.02097	0.087438
	20.3	72.3826	-0.01994	0.103872
	20.4	72.3824	-0.01875	0.118983
	20.5	72.3821	-0.01742	0.132576
	20.6	72.3818	-0.01595	0.14458
	20.7	72.3815	-0.01435	0.154893
	20.8	72.3813	-0.01264	0.163524
	20.9	72.3812	-0.01083	0.170457
	21	72.3813	-0.00897	0.175886
	21.1	72.3812	-0.00706	0.180042
	21.2	72.3811	-0.00515	0.182978
	21.3	72.3811	-0.00324	0.184538
	21.4	72.3814	-0.00135	0.184869
	21.5	72.3816	0.000515	0.184318
	21.6	72.3818	0.002358	0.183143
	21.7	72.3819	0.004189	0.18161
	21.8	72.3819	0.006005	0.179767
	21.9	72.3818	0.00779	0.177719
	22	72.3817	0.009545	0.175492
	22.1	72.3815	0.011284	0.172948
	22.2	72.3814	0.013011	0.16976
	22.3	72.3815	0.014729	0.165747
	22.4	72.3817	0.016426	0.160998
	22.5	72.3818	0.01809	0.155661
	22.6	72.3821	0.019711	0.149732
	22.7	72.3824	0.021268	0.143107
	22.8	72.3827	0.022729	0.135781
	22.9	72.3832	0.024079	0.12774
	23	72.3836	0.025325	0.119155
	23.1	72.384	0.026469	0.110014
	23.2	72.3844	0.027513	0.100384
	23.3	72.3848	0.028457	0.090491
	23.4	72.3852	0.029305	0.080648
	23.5	72.3853	0.030058	0.070931
	23.6	72.3855	0.030724	0.061095
	23.7	72.3858	0.031291	0.050981
	23.8	72.3861	0.031758	0.04042
	23.9	72.3864	0.032127	0.029384
	24	72.3868	0.032407	0.017802
	24.1	72.3872	0.032591	0.005629
	24.2	72.3877	0.032656	-0.0071
	24.3	72.3881	0.032587	-0.02013
	24.4	72.3885	0.032364	-0.03337
	24.5	72.3889	0.031983	-0.04691
	24.6	72.3893	0.031441	-0.06079
	24.7	72.3897	0.030734	-0.07495
	24.8	72.3902	0.029872	-0.08922
	24.9	72.3906	0.028876	-0.10347
	25	72.3909	0.027753	-0.11757
	25.1	72.3912	0.026498	-0.13159
	25.2	72.3914	0.025112	-0.14548
	25.3	72.3915	0.023596	-0.15926
	25.4	72.3916	0.02195	-0.1731
	25.5	72.3918	0.020171	-0.18715
	25.6	72.392	0.018255	-0.20139
	25.7	72.3922	0.016192	-0.21554
	25.8	72.3924	0.013983	-0.22939
	25.9	72.3927	0.011622	-0.24264
	26	72.3931	0.0091	-0.25499
	26.1	72.3935	0.006418	-0.26612
	26.2	72.3938	0.003586	-0.27567
	26.3	72.394	0.000633	-0.28332
	26.4	72.3942	-0.00241	-0.2889
	26.5	72.3944	-0.00552	-0.29207
	26.6	72.3943	-0.00865	-0.29252
	26.7	72.3942	-0.01176	-0.29006
	26.8	72.3939	-0.01483	-0.28457
	26.9	72.3936	-0.01781	-0.27613
	27	72.3931	-0.02068	-0.26477
	27.1	72.3927	-0.02343	-0.25066
	27.2	72.3923	-0.026	-0.23387
	27.3	72.3919	-0.02839	-0.21458
	27.4	72.3917	-0.03056	-0.19292
	27.5	72.3914	-0.0325	-0.16896
	27.6	72.391	-0.03419	-0.14282
	27.7	72.3906	-0.0356	-0.11483
	27.8	72.3902	-0.03671	-0.0854
	27.9	72.3897	-0.03751	-0.0548
	28	72.389	-0.03798	-0.02347
	28.1	72.3883	-0.03808	0.008112
	28.2	72.3875	-0.03782	0.039498
	28.3	72.3868	-0.03721	0.070202
	28.4	72.3861	-0.03625	0.099696
	28.5	72.3854	-0.03496	0.127535
	28.6	72.3847	-0.03338	0.153118
	28.7	72.3842	-0.03153	0.175899
	28.8	72.3839	-0.02945	0.195557
	28.9	72.3836	-0.02718	0.211832
	29	72.3833	-0.02475	0.224647
	29.1	72.3831	-0.02221	0.233851
	29.2	72.3829	-0.0196	0.239476
	29.3	72.3828	-0.01697	0.24157
	29.4	72.3826	-0.01436	0.240221
	29.5	72.3824	-0.01179	0.235548
	29.6	72.3824	-0.00929	0.227688
	29.7	72.3825	-0.0069	0.216904
	29.8	72.3826	-0.00464	0.203672
	29.9	72.3827	-0.00254	0.188429
	30	72.3829	-0.00062	0.171469
	30.1	72.3832	0.001091	0.153226
	30.2	72.3834	0.002573	0.134092
	30.3	72.3836	0.00382	0.114421
	30.4	72.3839	0.004839	0.094546
	30.5	72.3841	0.005638	0.07492
	30.6	72.3844	0.00622	0.055933
	30.7	72.3846	0.006601	0.038074
	30.8	72.3846	0.006799	0.021763
	30.9	72.3846	0.006828	0.007163
	31	72.3847	0.006703	-0.00563
	31.1	72.3849	0.00645	-0.01659
	31.2	72.385	0.006091	-0.02562
	31.3	72.385	0.005659	-0.03281
	31.4	72.3852	0.005184	-0.03825
	31.5	72.3853	0.004679	-0.04196
	31.6	72.3854	0.004164	-0.04405
	31.7	72.3855	0.003648	-0.04474
	31.8	72.3853	0.003146	-0.04433
	31.9	72.3851	0.002663	-0.04328
	32	72.385	0.002209	-0.04193
	32.1	72.3848	0.001793	-0.04048
	32.2	72.3847	0.001417	-0.03925
	32.3	72.3846	0.001082	-0.03845
	32.4	72.3846	0.000771	-0.03829
	32.5	72.3846	0.000466	-0.03891
	32.6	72.3845	0.000153	-0.04058
	32.7	72.3845	-0.00018	-0.0435
	32.8	72.3845	-0.00055	-0.04784
	32.9	72.3847	-0.00097	-0.05367
	33	72.3848	-0.00145	-0.0608
	33.1	72.3847	-0.00201	-0.06903
	33.2	72.3848	-0.00266	-0.07822
	33.3	72.3848	-0.00343	-0.08824
	33.4	72.3849	-0.00432	-0.09879
	33.5	72.3849	-0.00536	-0.10961
	33.6	72.385	-0.00652	-0.12045
	33.7	72.3852	-0.00782	-0.13101
	33.8	72.3853	-0.00923	-0.14081
	33.9	72.3854	-0.01077	-0.14941
	34	72.3855	-0.0124	-0.15637
	34.1	72.3854	-0.01412	-0.16144
	34.2	72.3854	-0.0159	-0.16456
	34.3	72.3852	-0.01773	-0.16555
	34.4	72.385	-0.01956	-0.1643
	34.5	72.3847	-0.02136	-0.16068
	34.6	72.3845	-0.02309	-0.15461
	34.7	72.3841	-0.02473	-0.14601
	34.8	72.3838	-0.02627	-0.13491
	34.9	72.3834	-0.02768	-0.12141
	35	72.3829	-0.02895	-0.10572
	35.1	72.3825	-0.03005	-0.08826
	35.2	72.3822	-0.03095	-0.06939
	35.3	72.3818	-0.03164	-0.0493
	35.4	72.3815	-0.03209	-0.02817
	35.5	72.3809	-0.0323	-0.0063
	35.6	72.3804	-0.03224	0.015935
	35.7	72.3797	-0.03195	0.038108
	35.8	72.379	-0.03142	0.059724
	35.9	72.3784	-0.03065	0.08031
	36	72.3778	-0.02965	0.099368
	36.1	72.3774	-0.02844	0.116516
	36.2	72.377	-0.02704	0.131577
	36.3	72.3768	-0.02547	0.144531
	36.4	72.3766	-0.02379	0.155358
	36.5	72.3764	-0.022	0.163907
	36.6	72.3763	-0.02017	0.170067
	36.7	72.3761	-0.01831	0.173792
	36.8	72.3761	-0.01645	0.175203
	36.9	72.376	-0.0146	0.174453
	37	72.3759	-0.01277	0.171802
	37.1	72.376	-0.01098	0.167481
	37.2	72.3759	-0.00924	0.161922
	37.3	72.3758	-0.00759	0.155467
	37.4	72.3757	-0.00601	0.148218
	37.5	72.3756	-0.00454	0.140318
	37.6	72.3757	-0.00317	0.131981
	37.7	72.3758	-0.00191	0.123589
	37.8	72.3761	-0.00074	0.115505
	37.9	72.3761	0.000342	0.108154
	38	72.3763	0.001332	0.101751
	38.1	72.3764	0.002234	0.096617
	38.2	72.3765	0.003066	0.09296
	38.3	72.3765	0.003852	0.090884
	38.4	72.3765	0.004617	0.090374
	38.5	72.3766	0.005393	0.091391
	38.6	72.3767	0.006196	0.09409
	38.7	72.3766	0.007053	0.098492
	38.8	72.3765	0.007985	0.104467
	38.9	72.3765	0.009	0.111755
	39	72.3765	0.010107	0.120088
	39.1	72.3766	0.011309	0.12908
	39.2	72.3766	0.012622	0.138495
	39.3	72.3766	0.014053	0.147894
	39.4	72.3768	0.015602	0.156928
	39.5	72.3769	0.017262	0.165406
	39.6	72.377	0.019028	0.173022
	39.7	72.377	0.020883	0.179399
	39.8	72.3771	0.022815	0.184049
	39.9	72.3771	0.024801	0.1866
	40	72.3773	0.026817	0.18669
	40.1	72.3775	0.028849	0.184121
	40.2	72.3778	0.03087	0.178671
	40.3	72.3781	0.032837	0.170256
	40.4	72.3785	0.034708	0.158835
	40.5	72.3789	0.036445	0.144453
	40.6	72.3792	0.038004	0.127146
	40.7	72.3798	0.039357	0.106863
	40.8	72.3805	0.040468	0.083782
	40.9	72.3811	0.041314	0.058303
	41	72.3817	0.041876	0.030816
	41.1	72.3823	0.042135	0.001751
	41.2	72.3829	0.042074	-0.02835
	41.3	72.3835	0.041672	-0.05902
	41.4	72.3842	0.040923	-0.0897
	41.5	72.3847	0.039834	-0.11995
	41.6	72.3854	0.038406	-0.14937
	41.7	72.3861	0.036655	-0.17745
	41.8	72.3868	0.034603	-0.2036
	41.9	72.3874	0.032274	-0.22722
	42	72.388	0.029704	-0.24789
	42.1	72.3886	0.02692	-0.26527
	42.2	72.389	0.023951	-0.27902
	42.3	72.3892	0.020841	-0.28891
	42.4	72.3894	0.017642	-0.2949
	42.5	72.3895	0.014406	-0.29703
	42.6	72.3896	0.011177	-0.29543
	42.7	72.3896	0.008001	-0.29014
	42.8	72.3895	0.004924	-0.28128
	42.9	72.3893	0.001986	-0.26917
	43	72.389	-0.00079	-0.25431
	43.1	72.3888	-0.00337	-0.23712
	43.2	72.3886	-0.00575	-0.21808
	43.3	72.3883	-0.0079	-0.19771
	43.4	72.3879	-0.0098	-0.1766
	43.5	72.3876	-0.01146	-0.15535
	43.6	72.3873	-0.01287	-0.13436
	43.7	72.387	-0.01405	-0.11398
	43.8	72.3866	-0.01499	-0.09457
	43.9	72.3863	-0.01572	-0.07656
	44	72.386	-0.01627	-0.06021
	44.1	72.3857	-0.01666	-0.04571
	44.2	72.3854	-0.01691	-0.03307
	44.3	72.3852	-0.01705	-0.02247
	44.4	72.3852	-0.0171	-0.0139
	44.5	72.3851	-0.01708	-0.00725
	44.6	72.3852	-0.01703	-0.00226
	44.7	72.385	-0.01694	0.001472
	44.8	72.3849	-0.01684	0.004094
	44.9	72.3849	-0.01674	0.005946
	45	72.3848	-0.01666	0.007384
	45.1	72.3847	-0.01659	0.00877
	45.2	72.3846	-0.01654	0.010408
	45.3	72.3844	-0.01648	0.012539
	45.4	72.3844	-0.01642	0.015406
	45.5	72.3844	-0.01633	0.019446
	45.6	72.3844	-0.01621	0.024979
	45.7	72.3844	-0.01603	0.032202
	45.8	72.3842	-0.01578	0.041252
	45.9	72.384	-0.01544	0.052035
	46	72.3836	-0.01499	0.064566
	46.1	72.3833	-0.01441	0.078577
	46.2	72.383	-0.01366	0.093784
	46.3	72.3827	-0.01273	0.109823
	46.4	72.3824	-0.01159	0.12639
	46.5	72.382	-0.01024	0.14311
	46.6	72.3816	-0.00867	0.15955
	46.7	72.3811	-0.0069	0.175105
	46.8	72.3809	-0.00496	0.189156
	46.9	72.3806	-0.00285	0.201242
	47	72.3805	-0.00061	0.210769
	47.1	72.3804	0.001734	0.21738
	47.2	72.3804	0.004152	0.220751
	47.3	72.3806	0.006601	0.220684
	47.4	72.3808	0.009035	0.21708
	47.5	72.3809	0.011419	0.209915
	47.6	72.3811	0.013704	0.199045
	47.7	72.3812	0.01585	0.184527
	47.8	72.3814	0.017821	0.166366
	47.9	72.3818	0.019578	0.144628
	48	72.382	0.021093	0.119679
	48.1	72.3825	0.022337	0.091766
	48.2	72.3829	0.023273	0.061391
	48.3	72.3834	0.023877	0.028997
	48.4	72.3839	0.024116	-0.00487
	48.5	72.3844	0.023956	-0.03956
	48.6	72.385	0.023397	-0.07441
	48.7	72.3856	0.022431	-0.10872
	48.8	72.3861	0.021071	-0.14167
	48.9	72.3867	0.01933	-0.17261
	49	72.3874	0.017236	-0.20075
	49.1	72.3877	0.014831	-0.22529
	49.2	72.3881	0.012164	-0.24579
	49.3	72.3883	0.009291	-0.26179
	49.4	72.3885	0.006273	-0.27287
	49.5	72.3885	0.003164	-0.27877
	49.6	72.3885	2.56e-05	-0.27938
	49.7	72.3882	-0.00308	-0.27468
	49.8	72.388	-0.0061	-0.26495
	49.9	72.3877	-0.00898	-0.25036
	50	72.3875	-0.01167	-0.23111
	50.1	72.3873	-0.01412	-0.20756
	50.2	72.3872	-0.01629	-0.18011
	50.3	72.3868	-0.01813	-0.14914
	50.4	72.3865	-0.01963	-0.11497
	50.5	72.386	-0.02075	-0.07811
	50.6	72.3855	-0.02146	-0.0393
	50.7	72.385	-0.02174	0.000735
	50.8	72.3843	-0.02159	0.041249
	50.9	72.3838	-0.02097	0.081481
	51	72.3831	-0.0199	0.120919
	51.1	72.3823	-0.01836	0.158802
	51.2	72.3819	-0.01639	0.194384
	51.3	72.3815	-0.01403	0.227277
	51.4	72.381	-0.01134	0.256974
	51.5	72.3806	-0.00835	0.282866
	51.6	72.3804	-0.00512	0.30451
	51.7	72.3804	-0.0017	0.321625
	51.8	72.3806	0.001866	0.33424
	51.9	72.3808	0.00553	0.342634
	52	72.3811	0.00925	0.347146
	52.1	72.3813	0.01297	0.348081
	52.2	72.3816	0.016646	0.345726
	52.3	72.3818	0.020239	0.34049
	52.4	72.3821	0.023719	0.332603
	52.5	72.3826	0.027082	0.322163
	52.6	72.3831	0.030319	0.309396
	52.7	72.3835	0.033416	0.294821
	52.8	72.384	0.036367	0.278847
	52.9	72.3846	0.039163	0.261903
	53	72.3851	0.041778	0.244388
	53.1	72.3856	0.044189	0.226365
	53.2	72.3862	0.046377	0.207979
	53.3	72.3866	0.048348	0.18943
	53.4	72.3872	0.050108	0.170744
	53.5	72.3879	0.051667	0.15198
	53.6	72.3887	0.053046	0.133475
	53.7	72.3895	0.054245	0.115457
	53.8	72.39	0.055276	0.098167
	53.9	72.3904	0.056148	0.081524
	54	72.3909	0.056856	0.065242
	54.1	72.3913	0.057401	0.048929
	54.2	72.3918	0.057795	0.032239
	54.3	72.3922	0.058044	0.01503
	54.4	72.3927	0.058157	-0.00293
	54.5	72.3933	0.058131	-0.02169
	54.6	72.3939	0.057937	-0.04109
	54.7	72.3945	0.057539	-0.0609
	54.8	72.3953	0.056915	-0.0811
	54.9	72.396	0.056049	-0.10158
	55	72.3966	0.054924	-0.12233
	55.1	72.3975	0.053545	-0.14323
	55.2	72.3986	0.051926	-0.16384
	55.3	72.3995	0.050093	-0.1836
	55.4	72.4002	0.048064	-0.20215
	55.5	72.4009	0.045854	-0.21913
	55.6	72.4015	0.043478	-0.23411
	55.7	72.4019	0.040943	-0.24693
	55.8	72.4021	0.038276	-0.25751
	55.9	72.4024	0.035506	-0.26598
	56	72.4028	0.032657	-0.27229
	56.1	72.4032	0.029753	-0.2762
	56.2	72.4036	0.026831	-0.27743
	56.3	72.4039	0.023914	-0.27572
	56.4	72.4043	0.021024	-0.2711
	56.5	72.4046	0.018176	-0.2635
	56.6	72.4047	0.015389	-0.253
	56.7	72.4046	0.01271	-0.23979
	56.8	72.4045	0.010187	-0.22431
	56.9	72.4044	0.007856	-0.20691
	57	72.4042	0.005745	-0.18791
	57.1	72.404	0.003887	-0.16749
	57.2	72.4036	0.002297	-0.14588
	57.3	72.4032	0.000978	-0.12365
	57.4	72.4029	-8.6e-05	-0.10131
	57.5	72.4028	-0.00092	-0.07928
	57.6	72.4026	-0.00152	-0.05782
	57.7	72.4025	-0.00192	-0.03738
	57.8	72.4026	-0.00212	-0.01819
	57.9	72.4028	-0.00213	-0.0004
	58	72.403	-0.00197	0.01609
	58.1	72.403	-0.00166	0.031371
	58.2	72.403	-0.00119	0.045292
	58.3	72.4029	-0.0006	0.057691
	58.4	72.4028	0.000114	0.068386
	58.5	72.4025	0.00093	0.077319
	58.6	72.4024	0.001845	0.084277
	58.7	72.4022	0.002848	0.089185
	58.8	72.4022	0.00391	0.091849
	58.9	72.4024	0.005	0.092345
	59	72.4025	0.00609	0.090738
	59.1	72.4027	0.007151	0.087046
	59.2	72.4029	0.008143	0.0812
	59.3	72.4032	0.009045	0.07311
	59.4	72.4034	0.009828	0.062943
	59.5	72.4035	0.010483	0.050766
	59.6	72.4036	0.011003	0.036677
	59.7	72.4037	0.011376	0.020714
	59.8	72.4037	0.011589	0.003102
	59.9	72.4038	0.011622	-0.01606
	60	72.4038	0.011463	-0.03656
	60.1	72.4038	0.011092	-0.05836
	60.2	72.4039	0.010491	-0.08142
	60.3	72.4042	0.009637	-0.10548
	60.4	72.4045	0.008515	-0.13024
	60.5	72.4048	0.007117	-0.1553
	60.6	72.4053	0.00544	-0.18022
	60.7	72.4056	0.003479	-0.20438
	60.8	72.406	0.001232	-0.22732
	60.9	72.4063	-0.00128	-0.24842
	61	72.4065	-0.00404	-0.2672
	61.1	72.4066	-0.00701	-0.28319
	61.2	72.4067	-0.01016	-0.29604
	61.3	72.4068	-0.01343	-0.3053
	61.4	72.4067	-0.01679	-0.31053
	61.5	72.4065	-0.02017	-0.31152
	61.6	72.4064	-0.02355	-0.30805
	61.7	72.4061	-0.02687	-0.30005
	61.8	72.4058	-0.03008	-0.28758
	61.9	72.4055	-0.03316	-0.27087
	62	72.405	-0.03603	-0.25006
	62.1	72.4045	-0.03866	-0.22549
	62.2	72.4038	-0.04101	-0.19743
	62.3	72.4031	-0.04302	-0.16622
	62.4	72.4023	-0.04467	-0.13232
	62.5	72.4015	-0.04594	-0.09624
	62.6	72.4006	-0.0468	-0.0586
	62.7	72.3997	-0.04723	-0.02004
	62.8	72.3989	-0.04724	0.018648
	62.9	72.3981	-0.04681	0.056884
	63	72.3972	-0.04596	0.09406
	63.1	72.3966	-0.04471	0.129666
	63.2	72.3959	-0.04306	0.163228
	63.3	72.3953	-0.04107	0.194321
	63.4	72.3947	-0.03877	0.22249
	63.5	72.3942	-0.03619	0.247351
	63.6	72.3937	-0.03339	0.268722
	63.7	72.3934	-0.03038	0.286345
	63.8	72.3931	-0.02721	0.300132
	63.9	72.3931	-0.02391	0.310189
	64	72.3929	-0.02054	0.316793
	64.1	72.3928	-0.01713	0.320099
	64.2	72.3926	-0.01372	0.320309
	64.3	72.3927	-0.01034	0.317591
	64.4	72.3928	-0.00705	0.312208
	64.5	72.3929	-0.00385	0.304509
	64.6	72.3931	-0.00075	0.294791
	64.7	72.3932	0.002218	0.283367
	64.8	72.3935	0.005051	0.270524
	64.9	72.3936	0.007733	0.256723
	65	72.3937	0.010257	0.24223
	65.1	72.3939	0.012626	0.227186
	65.2	72.3939	0.014834	0.211672
	65.3	72.3941	0.016874	0.195736
	65.4	72.3943	0.018746	0.179566
	65.5	72.3944	0.020462	0.163359
	65.6	72.3945	0.022021	0.147175
	65.7	72.3949	0.023417	0.131036
	65.8	72.3953	0.024648	0.115193
	65.9	72.3956	0.025706	0.099814
	66	72.3959	0.026599	0.08498
	66.1	72.3962	0.027336	0.07061
	66.2	72.3966	0.027918	0.056729
	66.3	72.397	0.028351	0.043466
	66.4	72.3975	0.028657	0.030941
	66.5	72.3978	0.028852	0.019294
	66.6	72.3981	0.028944	0.008474
	66.7	72.3985	0.028935	-0.00151
	66.8	72.3988	0.028828	-0.01055
	66.9	72.3991	0.028633	-0.01856
	67	72.3994	0.028361	-0.0257
	67.1	72.3999	0.028021	-0.03194
	67.2	72.4002	0.027616	-0.03719
	67.3	72.4007	0.027155	-0.04138
	67.4	72.401	0.026652	-0.04433
	67.5	72.4014	0.026123	-0.04615
	67.6	72.4017	0.025574	-0.04694
	67.7	72.402	0.02502	-0.04675
	67.8	72.4021	0.024481	-0.04569
	67.9	72.4021	0.02397	-0.04399
	68	72.4021	0.023508	-0.04192
	68.1	72.4022	0.023094	-0.03977
	68.2	72.4022	0.022728	-0.03773
	68.3	72.4023	0.022411	-0.03602
	68.4	72.4024	0.022133	-0.03499
	68.5	72.4025	0.021876	-0.03491
	68.6	72.4028	0.021622	-0.03615
	68.7	72.403	0.021351	-0.03876
	68.8	72.4033	0.021046	-0.04279
	68.9	72.4036	0.020697	-0.04831
	69	72.4039	0.020281	-0.05533
	69.1	72.4042	0.01978	-0.06374
	69.2	72.4045	0.01917	-0.07359
	69.3	72.4048	0.018443	-0.08483
	69.4	72.4049	0.017593	-0.09745
	69.5	72.4052	0.016613	-0.11153
	69.6	72.4054	0.015494	-0.12692
	69.7	72.4057	0.014226	-0.14345
	69.8	72.406	0.012791	-0.16086
	69.9	72.4061	0.011171	-0.17898
	70	72.4062	0.009352	-0.19769
	70.1	72.4065	0.007314	-0.21687
	70.2	72.4068	0.005051	-0.23629
	70.3	72.4071	0.002566	-0.25572
	70.4	72.4074	-0.00013	-0.27482
	70.5	72.4075	-0.00303	-0.29325
	70.6	72.4076	-0.00613	-0.31059
	70.7	72.4076	-0.00941	-0.3264
	70.8	72.4075	-0.01286	-0.34046
	70.9	72.4074	-0.01646	-0.35264
	71	72.4071	-0.02019	-0.36293
	71.1	72.4068	-0.02402	-0.37127
	71.2	72.4065	-0.02792	-0.37752
	71.3	72.4061	-0.03185	-0.38141
	71.4	72.4059	-0.0358	-0.38279
	71.5	72.4056	-0.03975	-0.38147
	71.6	72.4052	-0.04368	-0.37719
	71.7	72.4046	-0.04759	-0.36981
	71.8	72.4041	-0.05143	-0.35937
	71.9	72.4036	-0.05518	-0.34595
	72	72.4031	-0.0588	-0.32947
	72.1	72.4027	-0.06224	-0.30977
	72.2	72.4021	-0.06545	-0.28658
	72.3	72.4014	-0.0684	-0.25978
	72.4	72.4005	-0.07104	-0.22941
	72.5	72.3996	-0.07337	-0.19564
	72.6	72.3986	-0.07534	-0.15865
	72.7	72.3975	-0.07692	-0.11878
	72.8	72.3965	-0.07807	-0.07652
	72.9	72.3954	-0.07876	-0.0322
	73	72.3944	-0.07896	0.013862
	73.1	72.3934	-0.07866	0.061522
	73.2	72.3923	-0.07783	0.110469
	73.3	72.3913	-0.07649	0.160192
	73.4	72.3902	-0.07463	0.210053
	73.5	72.3891	-0.07226	0.259469
	73.6	72.388	-0.06938	0.307895
	73.7	72.3869	-0.06599	0.354667
	73.8	72.3861	-0.06208	0.399164
	73.9	72.3853	-0.0577	0.441019
	74	72.3845	-0.05287	0.479924
	74.1	72.3837	-0.04762	0.515487
	74.2	72.3829	-0.04201	0.547279
	74.3	72.3823	-0.0361	0.574726
	74.4	72.3818	-0.02993	0.597407
	74.5	72.3815	-0.02357	0.615069
	74.6	72.3812	-0.01704	0.627553
	74.7	72.381	-0.0104	0.634677
	74.8	72.3811	-0.00371	0.636399
	74.9	72.3812	0.002982	0.632914
	75	72.3813	0.009604	0.62443
	75.1	72.3814	0.016108	0.611082
	75.2	72.3817	0.022439	0.592898
	75.3	72.3821	0.028537	0.570068
	75.4	72.3826	0.034354	0.542976
	75.5	72.3832	0.039852	0.512145
	75.6	72.3838	0.044998	0.478081
	75.7	72.3847	0.049762	0.441305
	75.8	72.3857	0.054106	0.402522
	75.9	72.3866	0.058007	0.362464
	76	72.3875	0.061451	0.321676
	76.1	72.3884	0.064439	0.280588
	76.2	72.3893	0.066974	0.23963
	76.3	72.3902	0.069065	0.199366
	76.4	72.3911	0.070742	0.160427
	76.5	72.392	0.072033	0.123292
	76.6	72.3928	0.072955	0.088263
	76.7	72.3936	0.073522	0.055773
	76.8	72.3945	0.073753	0.025642
	76.9	72.3952	0.073685	-0.00175
	77	72.396	0.073358	-0.0262
	77.1	72.3969	0.072802	-0.04747
	77.2	72.3979	0.072043	-0.0652
	77.3	72.3989	0.071132	-0.07912
	77.4	72.3998	0.070051	-0.08901
	77.5	72.4007	0.068855	-0.09441
	77.6	72.4014	0.067598	-0.09622
	77.7	72.4021	0.066337	-0.09377
	77.8	72.4025	0.065132	-0.09593
	77.9	72.4028	0.064028	-0.09543
	78	72.4031	0.063072	-0.09147
	78.1	72.4034	0.062357	-0.08435
	78.2	72.4038	0.061811	-0.07443
	78.3	72.4043	0.06155	-0.06107
	78.4	72.4049	0.060531	-0.04095
	78.5	72.4055	0.05968	-0.01471
	78.6	72.4061	0.059074	0.017325
	78.7	72.4067	0.058733	0.05153
	78.8	72.4073	0.058666
	78.9	72.4079	0.059008
	79	72.4085	0.060217
	79.1	72.4089	0.062263
	79.2	72.4091	0.065151
	79.3	72.4093	0.06854
	79.4	72.4099
	79.5	72.4111
	79.6	72.4123
	79.7	72.4131
	79.8	72.4134
	79.9	72.415
	80

## Sheet: 5e
Repeat 1
Time (min)	PII			PI			PIII			EchOce			Normal Clotting (PBS)			No Clotting (no calcium)
0	0.052	0.052	0.054	0.049	0.049	0.05	0.051	0.052	0.053	0.048	0.049	0.053	0.046	0.048	0.048	0.052	0.049	0.05
2	0.052	0.051	0.054	0.05	0.05	0.051	0.051	0.052	0.052	0.252	0.22	0.223	0.046	0.048	0.048	0.052	0.048	0.05
4	0.051	0.051	0.053	0.05	0.051	0.051	0.051	0.052	0.052	0.339	0.286	0.303	0.046	0.049	0.048	0.051	0.048	0.049
6	0.052	0.051	0.053	0.051	0.051	0.052	0.05	0.052	0.052	0.38	0.335	0.352	0.046	0.05	0.048	0.051	0.048	0.049
8	0.051	0.05	0.053	0.051	0.052	0.053	0.05	0.051	0.052	0.395	0.378	0.39	0.046	0.052	0.048	0.051	0.048	0.049
10	0.052	0.051	0.053	0.052	0.053	0.054	0.051	0.052	0.052	0.401	0.412	0.413	0.046	0.058	0.049	0.051	0.048	0.05
12	0.052	0.051	0.054	0.053	0.055	0.055	0.052	0.052	0.053	0.406	0.425	0.421	0.046	0.061	0.049	0.052	0.049	0.049
14	0.052	0.053	0.054	0.056	0.058	0.057	0.053	0.053	0.054	0.409	0.431	0.426	0.053	0.062	0.051	0.052	0.049	0.049
16	0.079	0.07	0.076	0.09	0.08	0.086	0.083	0.07	0.073	0.413	0.436	0.431	0.095	0.087	0.073	0.051	0.048	0.049
18	0.154	0.119	0.14	0.168	0.137	0.149	0.164	0.12	0.125	0.416	0.44	0.436	0.198	0.142	0.13	0.052	0.048	0.049
20	0.279	0.208	0.251	0.284	0.232	0.252	0.293	0.208	0.215	0.419	0.443	0.44	0.343	0.232	0.225	0.051	0.048	0.049
22	0.4	0.305	0.375	0.399	0.325	0.352	0.415	0.312	0.321	0.422	0.447	0.443	0.45	0.331	0.327	0.051	0.048	0.049
24	0.472	0.392	0.466	0.472	0.403	0.439	0.476	0.404	0.411	0.424	0.45	0.446	0.49	0.416	0.415	0.052	0.048	0.049
26	0.497	0.467	0.507	0.502	0.473	0.504	0.496	0.478	0.483	0.426	0.453	0.449	0.506	0.486	0.482	0.051	0.048	0.049
28	0.506	0.513	0.52	0.515	0.517	0.532	0.504	0.517	0.517	0.428	0.456	0.452	0.516	0.525	0.511	0.052	0.048	0.05
30	0.511	0.528	0.526	0.521	0.531	0.543	0.509	0.529	0.528	0.43	0.458	0.454	0.522	0.538	0.52	0.051	0.048	0.049
Repeat 2
Time (min)	PII			PI			PIII			EchOce			Normal clotting (PBS)
0	0.052	0.053	0.053	0.05	0.05	0.049	0.051	0.052	0.054	0.057	0.06	0.061	0.047	0.05	0.047
2	0.052	0.052	0.052	0.05	0.05	0.049	0.051	0.051	0.054	0.224	0.224	0.192	0.047	0.05	0.048
4	0.052	0.052	0.052	0.052	0.052	0.05	0.051	0.05	0.052	0.305	0.307	0.258	0.048	0.05	0.048
6	0.052	0.052	0.052	0.053	0.052	0.052	0.051	0.051	0.052	0.351	0.358	0.306	0.048	0.05	0.052
8	0.052	0.052	0.052	0.055	0.054	0.052	0.051	0.051	0.053	0.383	0.394	0.349	0.048	0.05	0.049
10	0.054	0.052	0.052	0.056	0.055	0.054	0.052	0.051	0.053	0.399	0.409	0.386	0.049	0.052	0.053
12	0.054	0.052	0.053	0.058	0.056	0.055	0.053	0.052	0.054	0.406	0.416	0.406	0.049	0.052	0.06
14	0.056	0.053	0.054	0.06	0.06	0.061	0.054	0.054	0.055	0.411	0.421	0.414	0.051	0.055	0.091
16	0.082	0.077	0.076	0.086	0.09	0.087	0.077	0.078	0.076	0.416	0.426	0.42	0.072	0.077	0.126
18	0.148	0.141	0.131	0.144	0.156	0.147	0.132	0.139	0.123	0.419	0.43	0.424	0.124	0.132	0.19
20	0.256	0.249	0.222	0.239	0.259	0.238	0.223	0.24	0.2	0.422	0.434	0.429	0.211	0.223	0.282
22	0.363	0.365	0.317	0.338	0.354	0.325	0.319	0.343	0.282	0.426	0.437	0.433	0.304	0.316	0.366
24	0.45	0.458	0.402	0.413	0.436	0.392	0.402	0.427	0.356	0.43	0.44	0.437	0.387	0.391	0.438
26	0.508	0.514	0.478	0.486	0.503	0.46	0.475	0.493	0.426	0.432	0.444	0.44	0.46	0.46	0.5
28	0.527	0.535	0.529	0.529	0.533	0.514	0.519	0.524	0.493	0.435	0.447	0.443	0.507	0.513	0.553
30	0.535	0.543	0.547	0.544	0.546	0.535	0.532	0.532	0.528	0.437	0.448	0.446	0.522	0.532	0.586
32	0.54	0.548	0.554	0.551	0.555	0.542	0.539	0.538	0.54	0.439	0.451	0.448	0.529	0.54	0.598
34	0.545	0.552	0.559	0.556	0.56	0.547	0.543	0.542	0.545	0.441	0.453	0.451	0.533	0.545	0.606
36	0.548	0.555	0.563	0.56	0.564	0.552	0.547	0.545	0.549	0.443	0.454	0.452	0.538	0.55	0.612
38	0.551	0.558	0.567	0.564	0.568	0.555	0.55	0.549	0.553	0.445	0.456	0.455	0.542	0.553	0.616
40	0.554	0.56	0.569	0.567	0.571	0.558	0.553	0.551	0.555	0.446	0.458	0.457	0.544	0.556	0.621
42	0.556	0.563	0.572	0.569	0.573	0.56	0.555	0.553	0.558	0.447	0.459	0.459	0.546	0.559	0.624
44	0.558	0.565	0.574	0.572	0.576	0.563	0.557	0.556	0.56	0.449	0.462	0.46	0.549	0.562	0.628
46	0.56	0.567	0.576	0.574	0.578	0.565	0.56	0.558	0.563	0.45	0.462	0.462	0.551	0.564	0.631
48	0.562	0.569	0.579	0.576	0.58	0.567	0.562	0.56	0.565	0.452	0.464	0.464	0.553	0.566	0.634
50	0.564	0.57	0.58	0.578	0.582	0.568	0.563	0.561	0.567	0.452	0.465	0.465	0.555	0.568	0.636
52	0.566	0.571	0.582	0.581	0.584	0.57	0.565	0.562	0.569	0.454	0.466	0.466	0.556	0.569	0.638
54	0.567	0.573	0.583	0.582	0.585	0.572	0.566	0.564	0.57	0.455	0.468	0.467	0.558	0.571	0.64
56	0.568	0.574	0.585	0.583	0.587	0.573	0.568	0.565	0.572	0.456	0.468	0.468	0.559	0.572	0.642
58	0.57	0.576	0.586	0.584	0.588	0.574	0.569	0.566	0.573	0.457	0.469	0.47	0.56	0.574	0.644
60	0.571	0.576	0.588	0.586	0.59	0.575	0.57	0.567	0.574	0.458	0.47	0.471	0.562	0.575	0.646
62	0.573	0.578	0.589	0.587	0.59	0.576	0.571	0.569	0.576	0.459	0.472	0.472	0.564	0.577	0.648
64	0.573	0.579	0.59	0.588	0.591	0.578	0.573	0.57	0.576	0.459	0.472	0.473	0.565	0.577	0.649
66	0.574	0.58	0.591	0.589	0.592	0.578	0.574	0.57	0.577	0.46	0.473	0.474	0.565	0.578	0.65
68	0.576	0.581	0.592	0.59	0.594	0.58	0.575	0.571	0.579	0.462	0.474	0.475	0.566	0.58	0.652
70	0.576	0.582	0.593	0.591	0.595	0.581	0.576	0.572	0.579	0.462	0.475	0.475	0.566	0.581	0.653
72	0.577	0.582	0.594	0.592	0.595	0.581	0.575	0.573	0.58	0.463	0.476	0.477	0.568	0.581	0.655
74	0.578	0.584	0.594	0.592	0.596	0.582	0.577	0.574	0.581	0.463	0.476	0.478	0.569	0.582	0.655
76	0.578	0.585	0.596	0.594	0.597	0.583	0.578	0.575	0.582	0.464	0.477	0.478	0.569	0.583	0.657
78	0.579	0.585	0.596	0.594	0.597	0.584	0.578	0.575	0.582	0.465	0.478	0.479	0.57	0.583	0.658
80	0.579	0.586	0.596	0.594	0.598	0.584	0.579	0.575	0.583	0.465	0.478	0.48	0.571	0.584	0.658
82	0.58	0.586	0.598	0.595	0.599	0.585	0.58	0.577	0.584	0.465	0.479	0.48	0.572	0.585	0.659
84	0.581	0.587	0.598	0.596	0.6	0.586	0.58	0.577	0.585	0.466	0.48	0.481	0.573	0.586	0.661
86	0.581	0.588	0.598	0.596	0.6	0.586	0.581	0.577	0.585	0.466	0.48	0.482	0.572	0.586	0.662
88	0.582	0.589	0.6	0.597	0.601	0.586	0.582	0.578	0.586	0.467	0.481	0.483	0.574	0.587	0.662

## Sheet: 5f
Repeat 1
[Sample] (nM)	PII		PI		PIII
25	92.6239	91.5357	77.3881	86.0943	66.1427	70.4958
50	84.9315	83.0635	72.2291	77.8331	66.2516	66.9988
100	78.4047	84.2412	63.2296	57.393	48.6381	49.2218
Repeat 2
[Sample] (nM)	PII		PI		PIII
50	84.7203	84.4475	60.1637	57.1624	85.266	80.6276
25	102.46	84.7478	70.2337	65.5597	85.7319	86.9619
12.5	105.589	96.8408	83.4751	72.7825	91.2515	90.7655
