# Supplementary figures and images for: Purified Zymogens Reveal Mechanisms of Snake Venom Metalloproteinase Auto-Activation
Source: eLife journal article supplement (doi:10.7554/elife.109112), 2026-01-21

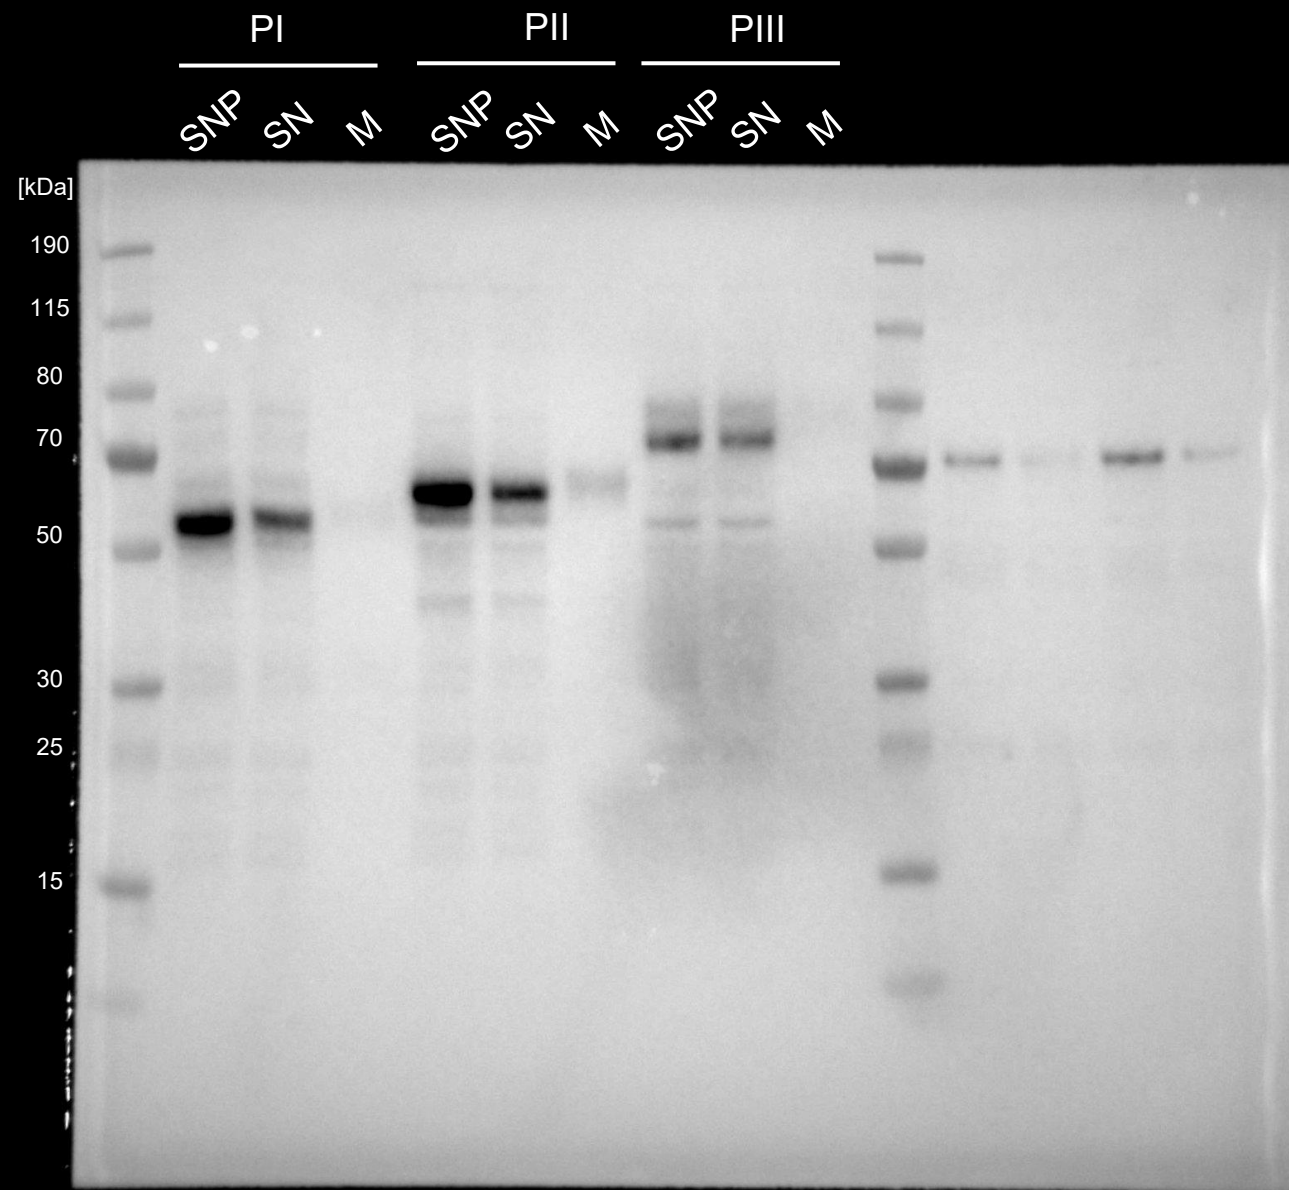

Supplement: fig2-data2 [file Figure 2d - source data 2.pdf › Figure 2d - source data 2.pdf]

Figure S8

Glycosylation test of recombinant SVMPs

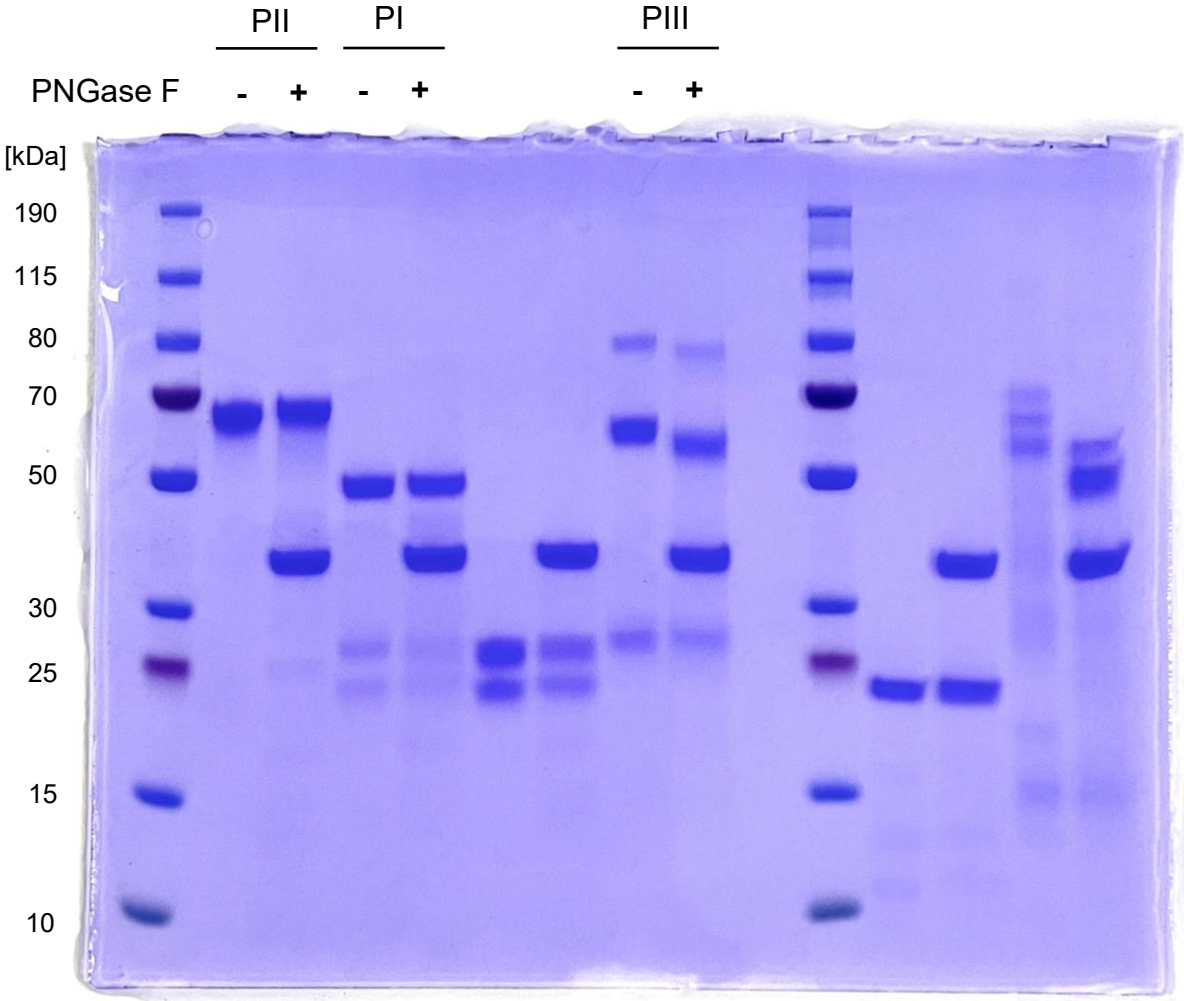

Supplement: fig3-figsupp5-data2 [file Figure 3 supplement 5 - source data 2.pdf › Figure 3 supplement 5 - source data 2/Figure 3 supplement 5 - source data 2.pdf]

Figure S10b

Coomassie-stained SDS gel of activated PI zym  $\Delta$ C SEC

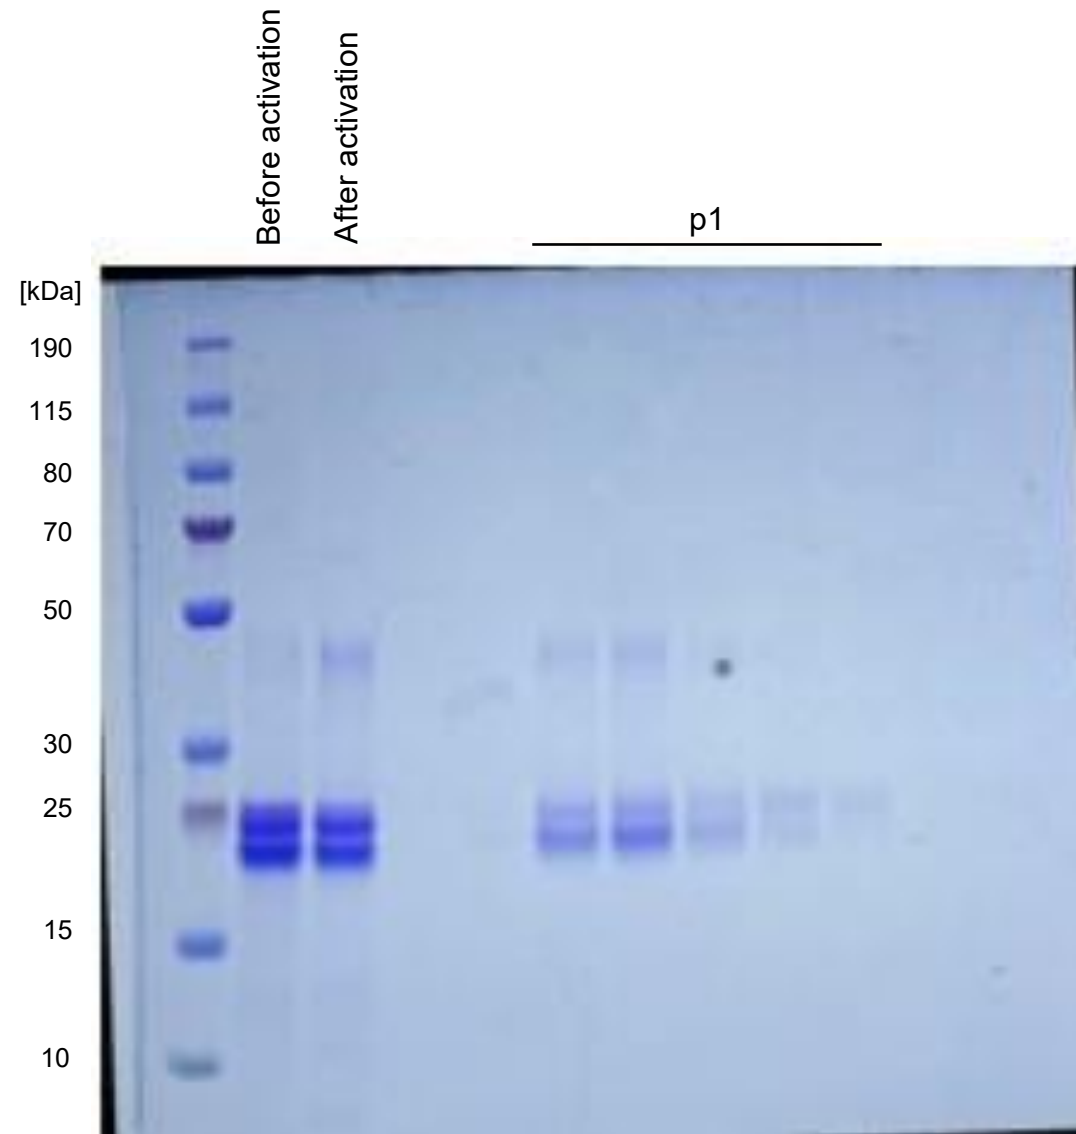

Supplement: fig3-figsupp7-data2 [file Figure 3 supplement 7 - source data 2.pdf › Figure 3 supplement 7 - source data 2/Figure 3 supplement 7 - source data 2.pdf]
